# Supplementary material for: Age–sex differences in the global burden of lower respiratory infections and risk factors, 1990–2019: results from the Global Burden of Disease Study 2019
Source: PubMed Central journal article supplement (PMC9605880; doi:10.1016/s1473-3099(22)00510-2), 2022-11
Supplement: mmc2.pdf [file mmc2.pdf]

# THE LANCET

## Infectious Diseases

### Supplementary appendix 2

This appendix formed part of the original submission and has been peer reviewed. We post it as supplied by the authors.

Supplement to: GBD 2019 LRI Collaborators. Age–sex differences in the global burden of lower respiratory infections and risk factors, 1990–2019: results from the Global Burden of Disease Study 2019. *Lancet Infect Dis* 2022; published online Aug 11. [https://doi.org/10.1016/S1473-3099\(22\)00510-2](https://doi.org/10.1016/S1473-3099(22)00510-2).

## Appendix 2

### “Age-sex differences in the global burden of lower respiratory infections and risk factors: results from the Global Burden of Disease Study 2019”

This appendix provides additional tables and figures for “Age-sex differences in the global burden of lower respiratory infections and risk factors: results from the Global Burden of Disease Study 2019”.

## TABLE OF CONTENTS

|                                                                                                                                                                                                                                                                                                                          |     |
|--------------------------------------------------------------------------------------------------------------------------------------------------------------------------------------------------------------------------------------------------------------------------------------------------------------------------|-----|
| Supplementary Appendix to “Age-sex differences in the global burden of lower respiratory infections and risk factors: results from the Global Burden of Disease Study 2019” .....                                                                                                                                        | 1   |
| Appendix Figure 1. Global time trend of lower respiratory infection incident episodes (A) and deaths (B) by age and sex, 1990-2019 .....                                                                                                                                                                                 | 3   |
| Appendix Table 1. Lower respiratory infection episodes and age standardized incidence rates (per 100, 000 people) among males and females in 2019 and the percent change in episodes and age standardized incidence rates between 1990 and 2019 for 21 GBD regions and 204 countries and territories (95% UI) .....      | 5   |
| Appendix Table 2. Lower respiratory infection episodes (in thousands) and incidence rates (per 100,000 people) in 2019 and the percent change in episodes and incidence rates between 1990 and 2019 by age, sex, and GBD super-regions (95% UI) .....                                                                    | 34  |
| Appendix Table 3. Lower respiratory infection deaths and age standardized mortality rates (per 100, 000 people) among males and females in 2019 and the percent change in deaths and age standardized mortality rates between 1990 and 2019 for 21 GBD regions and 204 countries and territories (95% UI) .....          | 38  |
| Appendix Table 4. Lower respiratory infection deaths and age standardized mortality rates attributable to all risk factors combined in 2019 and the percent change in attributable deaths and age standardized mortality rates between 1990 and 2019 for 21 GBD regions and 204 countries and territories (95% UI) ..... | 68  |
| Appendix Table 5. Lower respiratory infection mortality attributable to all evaluated risk factors combined in 2019 and the percent change in attributable mortality between 1990 and 2019 by age, sex, and GBD super-regions (95% UI)...                                                                                | 97  |
| Appendix Table 6. Lower respiratory infection age-standardized risk-deleted mortality rate (per 100,000 people) for all evaluated risk factors combined by sex for 204 countries and territories and 21 GBD regions for 1990 and 2019 (95% UI).....                                                                      | 102 |
| Appendix Table 7. Population-attributable fractions of lower respiratory infections due to evaluated risk factors among children younger than 5 years in 2019, males (M) and females (F) (95% UI).....                                                                                                                   | 117 |
| Appendix Table 8. Population-attributable fractions of lower respiratory infections due to evaluated risk factors among children aged 5-14 years in 2019, males (M) and females (F) (95% UI) .....                                                                                                                       | 134 |
| Appendix Table 9. Population-attributable fractions of lower respiratory infections due to evaluated risk factors among people aged 15-49 years in 2019, males (M) and females (F) (95% UI) .....                                                                                                                        | 147 |
| Appendix Table 10. Population-attributable fractions of lower respiratory infections due to evaluated risk factors among people aged 50 to 69 years in 2019, males (M) and females (F) (95% UI) .....                                                                                                                    | 160 |
| Appendix table 11. Population-attributable fractions of lower respiratory infections due to evaluated risk factors among people aged 70 years and older in 2019, males (M) and females (F) (95% UI) .....                                                                                                                | 173 |

Appendix Figure 1. Global time trend of lower respiratory infection incident episodes (A) and deaths (B) by age and sex, 1990-2019

A

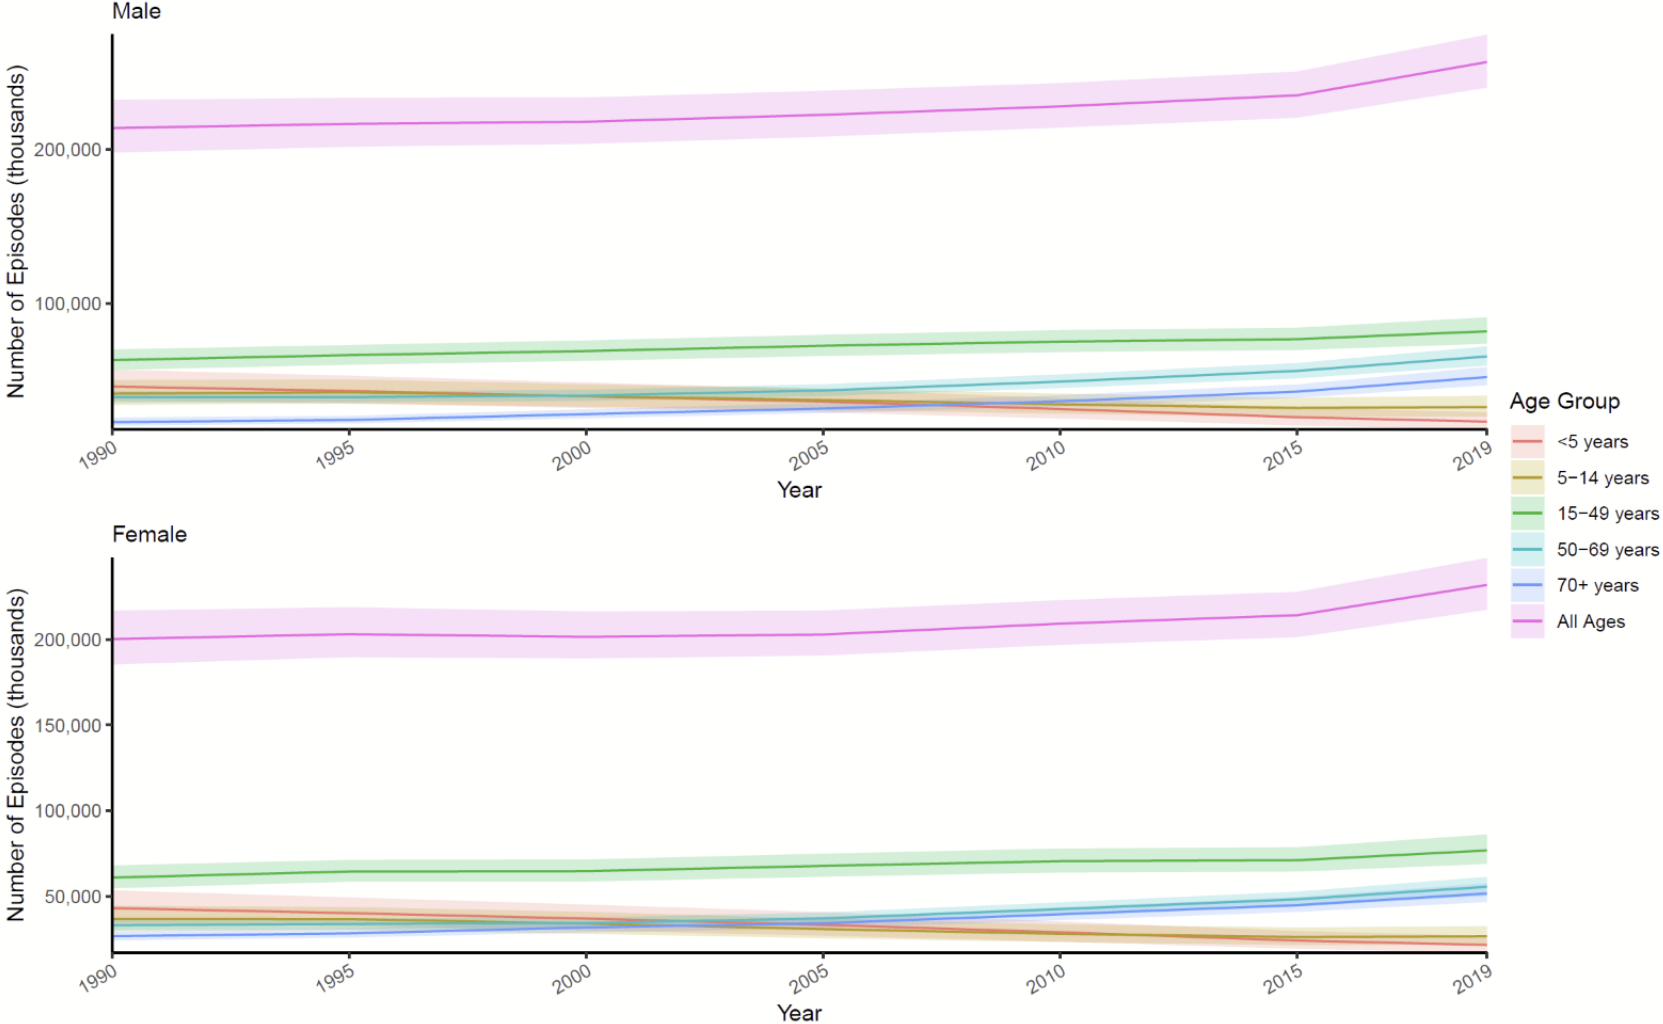

B

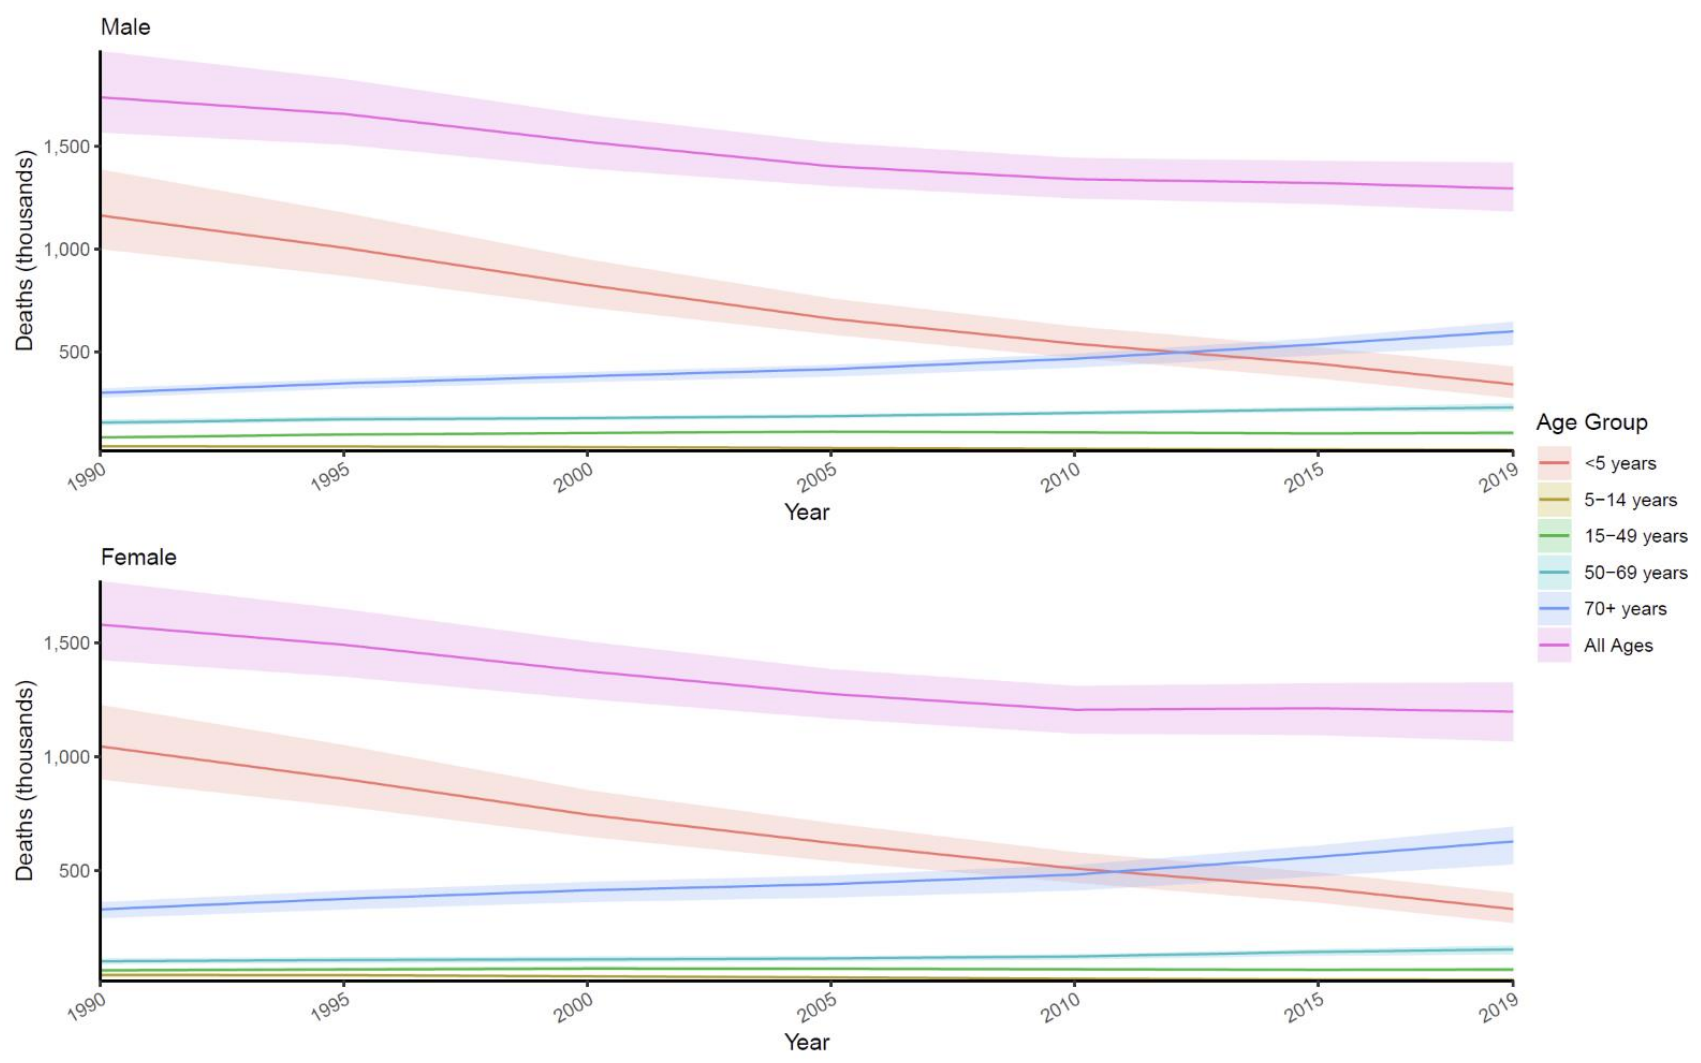

Appendix Table 1. Lower respiratory infection episodes and age standardized incidence rates (per 100, 000 people) among males and females in 2019 and the percent change in episodes and age standardized incidence rates between 1990 and 2019 for 21 GBD regions and 204 countries and territories (95% UI)

|                                                         | Male                                                      |                                               |                                       |                                         | Female                                                    |                                               |                                         |                                         |
|---------------------------------------------------------|-----------------------------------------------------------|-----------------------------------------------|---------------------------------------|-----------------------------------------|-----------------------------------------------------------|-----------------------------------------------|-----------------------------------------|-----------------------------------------|
|                                                         | 2019                                                      |                                               | Percent change from 1990 to 2019      |                                         | 2019                                                      |                                               | Percent change from 1990 to 2019        |                                         |
|                                                         | Number of episodes                                        | Age standardized incidence (per 100,000)      | Number of episodes                    | Age standardized incidence              | Number of episodes                                        | Age standardized incidence (per 100,000)      | Number of episodes                      | Age standardized incidence              |
| <b>Global</b>                                           | <b>257,000,000</b><br><b>(240,000,000 to 275,000,000)</b> | <b>6,832.0</b><br><b>(6,393.8 to 7,313.1)</b> | <b>20.0</b><br><b>(15.8 to 24.5)</b>  | <b>-22.6</b><br><b>(-24.3 to -21.0)</b> | <b>232,000,000</b><br><b>(217,000,000 to 248,000,000)</b> | <b>5,837.3</b><br><b>(5,450.4 to 6,245.7)</b> | <b>15.8</b><br><b>(11.9 to 19.7)</b>    | <b>-25.5</b><br><b>(-26.9 to -24.0)</b> |
| <b>Central Europe, Eastern Europe, and Central Asia</b> | <b>13,000,000</b><br><b>(12,300,000 to 13,900,000)</b>    | <b>6,040.8</b><br><b>(5,665.9 to 6,450.1)</b> | <b>-7.3</b><br><b>(-10.2 to -4.1)</b> | <b>-20.2</b><br><b>(-22.2 to -18.1)</b> | <b>9,830,000</b><br><b>(9,210,000 to 10,500,000)</b>      | <b>3,844.3</b><br><b>(3,551.0 to 4,171.0)</b> | <b>-15.1</b><br><b>(-17.7 to -12.4)</b> | <b>-24.5</b><br><b>(-26.1 to -23.0)</b> |
| Central Asia                                            | 2,510,000<br>(2,360,000 to 2,690,000)                     | 6,635.8<br>(6,262.8 to 7,107.6)               | -3.8<br>(-8.8 to 1.3)                 | -23.0<br>(-26.1 to -19.5)               | 1,940,000<br>(1,820,000 to 2,070,000)                     | 4,523.5<br>(4,244.9 to 4,816.8)               | -13.6<br>(-17.8 to -9.3)                | -27.6<br>(-30.4 to -24.6)               |
| Armenia                                                 | 88,800<br>(81,300 to 97,600)                              | 5,847.1<br>(5,333.4 to 6,424.6)               | -7.5<br>(-14.8 to 0.8)                | -12.5<br>(-18.7 to -5.5)                | 75,700<br>(69,000 to 83,100)                              | 4,306.2<br>(3,937.4 to 4,728.5)               | -8.2<br>(-16.3 to 0.8)                  | -13.9<br>(-19.9 to -6.9)                |
| Azerbaijan                                              | 283,000<br>(260,000 to 307,000)                           | 6,724.3<br>(6,216.1 to 7,350.8)               | 1.0<br>(-7.6 to 11.2)                 | -22.8<br>(-28.7 to 15.8)                | 208,000<br>(192,000 to 224,000)                           | 4,732.7<br>(4,374.9 to 5,112.5)               | -8.6<br>(-16.0 to 0.3)                  | -22.8<br>(-28.6 to 16.4)                |
| Georgia                                                 | 158,000<br>(144,000 to 173,000)                           | 7,846.0<br>(7,155.4 to 8,546.7)               | -19.6<br>(-26.9 to 10.3)              | -5.2<br>(-13.9 to 5.0)                  | 135,000<br>(123,000 to 148,000)                           | 5,287.0<br>(4,857.7 to 5,766.4)               | -23.6<br>(-30.9 to 15.2)                | -14.2<br>(-21.4 to 6.3)                 |
| Kazakhstan                                              | 508,000<br>(467,000 to 551,000)                           | 6,707.4<br>(6,211.3 to 7,314.8)               | 0.4<br>(-7.5 to 8.7)                  | -12.9<br>(-19.2 to -5.7)                | 391,000<br>(359,000 to 429,000)                           | 4,144.8<br>(3,821.1 to 4,545.1)               | -7.1<br>(-14.2 to 0.9)                  | -18.4<br>(-24.4 to 12.0)                |
| Kyrgyzstan                                              | 127,000<br>(117,000 to 138,000)                           | 4,717.6<br>(4,358.3 to 5,073.7)               | -16.7<br>(-23.7 to 9.1)               | -38.7<br>(-43.4 to 34.0)                | 103,000<br>(93,700 to 113,000)                            | 3,327.0<br>(3,051.0 to 3,656.1)               | -22.8<br>(-30.2 to 15.5)                | -40.0<br>(-45.4 to 35.0)                |

|                        | Male                                  |                                          |                                  |                            | Female                                |                                          |                                  |                            |
|------------------------|---------------------------------------|------------------------------------------|----------------------------------|----------------------------|---------------------------------------|------------------------------------------|----------------------------------|----------------------------|
|                        | 2019                                  |                                          | Percent change from 1990 to 2019 |                            | 2019                                  |                                          | Percent change from 1990 to 2019 |                            |
|                        | Number of episodes                    | Age standardized incidence (per 100,000) | Number of episodes               | Age standardized incidence | Number of episodes                    | Age standardized incidence (per 100,000) | Number of episodes               | Age standardized incidence |
| Mongolia               | 71,700<br>(65,700 to 77,900)          | 5,481.6<br>(5,052.0 to 5,960.9)          | -19.0<br>(-26.9 to 11.1)         | -43.4<br>(-47.7 to 38.3)   | 56,300<br>(51,700 to 61,600)          | 3,749.1<br>(3,454.0 to 4,083.3)          | -30.6<br>(-36.5 to 24.4)         | -50.1<br>(-53.9 to 46.2)   |
| Tajikistan             | 265,000<br>(242,000 to 290,000)       | 7,479.2<br>(6,906.0 to 8,138.1)          | -0.7<br>(-9.8 to 11.3)           | -31.2<br>(-37.3 to 23.4)   | 206,000<br>(187,000 to 227,000)       | 5,449.2<br>(5,011.1 to 5,928.5)          | -13.0<br>(-21.0 to 4.3)          | -35.9<br>(-41.4 to 30.5)   |
| Turkmenistan           | 118,000<br>(109,000 to 128,000)       | 5,298.9<br>(4,898.2 to 5,690.8)          | -18.2<br>(-24.9 to 10.2)         | -39.7<br>(-44.1 to 34.7)   | 88,400<br>(81,500 to 95,900)          | 3,715.6<br>(3,432.6 to 4,018.9)          | -30.3<br>(-36.7 to 22.2)         | -43.0<br>(-47.7 to 37.5)   |
| Uzbekistan             | 890,000<br>(826,000 to 964,000)       | 6,831.8<br>(6,372.8 to 7,426.5)          | 1.3<br>(-7.9 to 12.3)            | -25.8<br>(-31.4 to 19.2)   | 681,000<br>(627,000 to 737,000)       | 4,752.3<br>(4,400.1 to 5,129.0)          | -10.9<br>(-18.9 to 2.3)          | -31.2<br>(-36.6 to 25.1)   |
| Central Europe         | 2,760,000<br>(2,590,000 to 2,970,000) | 4,186.9<br>(3,859.7 to 4,558.2)          | -18.5<br>(-21.6 to 15.4)         | -30.5<br>(-32.6 to 28.4)   | 2,370,000<br>(2,210,000 to 2,550,000) | 3,194.1<br>(2,902.8 to 3,509.2)          | -22.9<br>(-26.2 to 20.0)         | -33.2<br>(-35.5 to 31.1)   |
| Albania                | 59,500<br>(54,200 to 65,500)          | 4,028.0<br>(3,676.7 to 4,421.0)          | -49.5<br>(-54.7 to 43.4)         | -50.6<br>(-54.4 to 46.4)   | 49,500<br>(45,100 to 54,300)          | 3,441.2<br>(3,090.1 to 3,805.9)          | -49.7<br>(-54.3 to 44.7)         | -46.6<br>(-50.6 to 42.1)   |
| Bosnia and Herzegovina | 65,000<br>(58,900 to 71,700)          | 3,797.4<br>(3,396.3 to 4,253.4)          | -33.2<br>(-38.7 to 26.3)         | -27.9<br>(-33.2 to 21.9)   | 60,100<br>(54,400 to 66,600)          | 3,341.3<br>(2,969.2 to 3,787.0)          | -34.5<br>(-40.2 to 28.3)         | -25.1<br>(-29.8 to 19.9)   |
| Bulgaria               | 181,000<br>(163,000 to 201,000)       | 4,384.1<br>(3,988.4 to 4,854.1)          | -49.3<br>(-54.2 to 44.9)         | -45.9<br>(-50.8 to 41.2)   | 151,000<br>(137,000 to 165,000)       | 3,329.3<br>(3,010.2 to 3,675.5)          | -44.4<br>(-49.6 to 38.7)         | -45.5<br>(-49.7 to 40.7)   |

|                 | Male                            |                                          |                                  |                            | Female                          |                                          |                                  |                            |
|-----------------|---------------------------------|------------------------------------------|----------------------------------|----------------------------|---------------------------------|------------------------------------------|----------------------------------|----------------------------|
|                 | 2019                            |                                          | Percent change from 1990 to 2019 |                            | 2019                            |                                          | Percent change from 1990 to 2019 |                            |
|                 | Number of episodes              | Age standardized incidence (per 100,000) | Number of episodes               | Age standardized incidence | Number of episodes              | Age standardized incidence (per 100,000) | Number of episodes               | Age standardized incidence |
| Croatia         | 85,000<br>(77,000 to 93,400)    | 3,617.0<br>(3,248.5 to 4,035.7)          | -31.5<br>(-37.2 to -25.4)        | -35.7<br>(-40.2 to -31.5)  | 69,400<br>(63,100 to 75,800)    | 2,663.2<br>(2,357.1 to 3,006.4)          | -35.8<br>(-41.6 to -29.6)        | -34.4<br>(-39.1 to -29.7)  |
| Czechia         | 265,000<br>(242,000 to 290,000) | 4,047.9<br>(3,674.6 to 4,445.2)          | 4.8<br>(-3.7 to 15.1)            | -22.8<br>(-27.9 to -16.5)  | 228,000<br>(207,000 to 252,000) | 3,115.2<br>(2,789.6 to 3,463.0)          | -9.5<br>(-17.1 to 1.1)           | -26.0<br>(-30.5 to -21.3)  |
| Hungary         | 172,000<br>(156,000 to 190,000) | 3,413.7<br>(3,052.2 to 3,802.3)          | -18.2<br>(-24.6 to -11.5)        | -22.3<br>(-26.9 to -16.4)  | 190,000<br>(174,000 to 209,000) | 3,210.4<br>(2,838.0 to 3,599.4)          | -11.0<br>(-19.2 to -3.1)         | -16.8<br>(-22.0 to -11.2)  |
| Montenegro      | 12,900<br>(11,700 to 14,200)    | 4,058.8<br>(3,640.7 to 4,490.2)          | 0.3<br>(-7.6 to 8.9)             | -12.3<br>(-18.2 to -6.5)   | 11,500<br>(10,500 to 12,600)    | 3,520.2<br>(3,126.0 to 3,974.5)          | -4.1<br>(-10.9 to 3.7)           | -11.5<br>(-16.9 to -5.6)   |
| North Macedonia | 41,200<br>(37,300 to 45,300)    | 3,978.6<br>(3,595.3 to 4,418.6)          | -14.3<br>(-21.2 to -6.0)         | -24.4<br>(-30.3 to -18.2)  | 34,500<br>(31,200 to 38,000)    | 3,452.5<br>(3,079.5 to 3,885.4)          | -17.8<br>(-24.2 to -10.3)        | -23.7<br>(-29.6 to -17.9)  |
| Poland          | 868,000<br>(807,000 to 933,000) | 3,823.8<br>(3,530.5 to 4,140.2)          | 16.3<br>(10.6 to 22.9)           | -14.3<br>(-16.6 to -11.6)  | 740,000<br>(688,000 to 801,000) | 2,737.1<br>(2,494.5 to 3,012.5)          | -5.4<br>(-9.3 to 0.8)            | -26.5<br>(-28.4 to -24.4)  |
| Romania         | 628,000<br>(568,000 to 683,000) | 5,544.4<br>(5,079.2 to 6,035.2)          | -36.5<br>(-41.6 to -31.1)        | -38.1<br>(-42.5 to -33.7)  | 516,000<br>(474,000 to 568,000) | 4,148.1<br>(3,786.2 to 4,581.2)          | -36.2<br>(-42.4 to -30.7)        | -40.3<br>(-45.3 to -35.6)  |
| Serbia          | 178,000<br>(162,000 to 199,000) | 3,547.0<br>(3,203.5 to 3,953.1)          | -2.4<br>(-10.1 to 8.0)           | -16.5<br>(-22.0 to -9.9)   | 141,000<br>(127,000 to 156,000) | 2,768.7<br>(2,459.2 to 3,085.6)          | -14.4<br>(-21.1 to -6.9)         | -20.8<br>(-25.9 to -15.7)  |



|                     | Male                                  |                                          |                                  |                            | Female                                |                                          |                                  |                            |
|---------------------|---------------------------------------|------------------------------------------|----------------------------------|----------------------------|---------------------------------------|------------------------------------------|----------------------------------|----------------------------|
|                     | 2019                                  |                                          | Percent change from 1990 to 2019 |                            | 2019                                  |                                          | Percent change from 1990 to 2019 |                            |
|                     | Number of episodes                    | Age standardized incidence (per 100,000) | Number of episodes               | Age standardized incidence | Number of episodes                    | Age standardized incidence (per 100,000) | Number of episodes               | Age standardized incidence |
| Slovakia            | 158,000<br>(143,000 to 175,000)       | 5,378.9<br>(4,889.0 to 5,922.5)          | -21.1<br>(-28.0 to 13.2)         | -35.4<br>(-40.7 to 29.7)   | 131,000<br>(119,000 to 144,000)       | 3,783.8<br>(3,425.3 to 4,238.6)          | -25.4<br>(-31.4 to 19.1)         | -38.1<br>(-42.4 to 33.3)   |
| Slovenia            | 51,100<br>(46,400 to 56,100)          | 4,195.5<br>(3,749.6 to 4,687.1)          | -6.2<br>(-12.7 to 1.5)           | -34.1<br>(-38.2 to 29.5)   | 47,400<br>(42,800 to 52,100)          | 3,319.3<br>(2,934.2 to 3,730.7)          | -10.8<br>(-18.1 to 2.5)          | -31.7<br>(-36.6 to 27.3)   |
| Eastern Europe      | 7,780,000<br>(7,250,000 to 8,320,000) | 6,964.0<br>(6,495.6 to 7,468.8)          | -3.6<br>(-7.1 to 0.1)            | -13.0<br>(-15.7 to 10.0)   | 5,520,000<br>(5,130,000 to 5,950,000) | 3,988.8<br>(3,635.1 to 4,347.3)          | -11.9<br>(-14.9 to 8.1)          | -17.1<br>(-19.3 to 14.5)   |
| Belarus             | 297,000<br>(273,000 to 322,000)       | 5,957.4<br>(5,480.8 to 6,466.5)          | -20.4<br>(-27.2 to 12.4)         | -25.2<br>(-30.8 to 18.6)   | 202,000<br>(183,000 to 223,000)       | 3,335.7<br>(2,964.8 to 3,728.7)          | -29.0<br>(-34.7 to 22.9)         | -30.3<br>(-34.8 to 25.9)   |
| Estonia             | 48,600<br>(43,700 to 54,200)          | 6,427.6<br>(5,802.8 to 7,153.4)          | -32.3<br>(-38.9 to 25.9)         | -34.2<br>(-40.0 to 28.9)   | 38,000<br>(34,400 to 42,300)          | 3,961.0<br>(3,569.0 to 4,413.2)          | -27.1<br>(-34.0 to 19.6)         | -29.6<br>(-34.4 to 24.5)   |
| Latvia              | 78,800<br>(71,200 to 87,700)          | 7,144.2<br>(6,487.7 to 7,874.9)          | -38.4<br>(-44.9 to 31.2)         | -29.7<br>(-36.0 to 22.9)   | 69,500<br>(63,000 to 76,200)          | 4,725.5<br>(4,267.1 to 5,240.7)          | -31.3<br>(-37.7 to 24.7)         | -24.8<br>(-29.8 to 19.8)   |
| Lithuania           | 131,000<br>(121,000 to 144,000)       | 8,053.2<br>(7,414.9 to 8,851.2)          | -13.8<br>(-21.1 to 6.5)          | -10.9<br>(-17.5 to -4.4)   | 105,000<br>(94,900 to 116,000)        | 4,923.4<br>(4,399.8 to 5,515.3)          | -13.4<br>(-21.5 to 4.7)          | -17.7<br>(-22.4 to 11.7)   |
| Republic of Moldova | 158,000<br>(142,000 to 173,000)       | 7,657.1<br>(6,961.9 to 8,383.0)          | -20.3<br>(-28.0 to 11.7)         | -23.4<br>(-30.0 to 16.5)   | 87,700<br>(79,300 to 96,100)          | 3,878.8<br>(3,515.8 to 4,272.2)          | -35.9<br>(-41.1 to 30.5)         | -34.6<br>(-38.8 to 30.1)   |

|                          | Male                                             |                                          |                                  |                                   | Female                                           |                                          |                                  |                                   |
|--------------------------|--------------------------------------------------|------------------------------------------|----------------------------------|-----------------------------------|--------------------------------------------------|------------------------------------------|----------------------------------|-----------------------------------|
|                          | 2019                                             |                                          | Percent change from 1990 to 2019 |                                   | 2019                                             |                                          | Percent change from 1990 to 2019 |                                   |
|                          | Number of episodes                               | Age standardized incidence (per 100,000) | Number of episodes               | Age standardized incidence        | Number of episodes                               | Age standardized incidence (per 100,000) | Number of episodes               | Age standardized incidence        |
| Russian Federation       | 5,270,000<br>(4,900,000 to 5,650,000)            | 6,822.0<br>(6,355.2 to 7,308.9)          | 2.1<br>(-1.4 to 5.5)             | -12.6<br>(-14.9 to -10.1)         | 3,830,000<br>(3,570,000 to 4,110,000)            | 3,967.8<br>(3,632.5 to 4,319.3)          | -5.2<br>(-8.2 to -2.2)           | -16.0<br>(-18.2 to -13.9)         |
| Ukraine                  | 1,790,000<br>(1,630,000 to 1,960,000)            | 7,549.9<br>(6,905.6 to 8,194.2)          | -9.8<br>(-18.0 to 1.3)           | -6.5<br>(-14.0 to 3.9)            | 1,190,000<br>(1,070,000 to 1,300,000)            | 4,133.8<br>(3,735.0 to 4,548.9)          | -22.4<br>(-29.5 to 14.2)         | -13.6<br>(-19.8 to 6.7)           |
| <b>High-income</b>       | <b>21,100,000<br/>(19,800,000 to 22,600,000)</b> | <b>3,252.5<br/>(3,007.1 to 3,529.1)</b>  | <b>12.4<br/>(9.0 to 15.1)</b>    | <b>-23.6<br/>(-25.1 to -21.7)</b> | <b>20,100,000<br/>(18,900,000 to 21,400,000)</b> | <b>2,830.7<br/>(2,600.1 to 3,068.3)</b>  | <b>9.2<br/>(7.0 to 11.9)</b>     | <b>-17.7<br/>(-19.2 to -15.9)</b> |
| Australasia              | 449,000<br>(416,000 to 487,000)                  | 2,576.1<br>(2,356.3 to 2,818.9)          | 34.6<br>(25.9 to 44.8)           | -26.8<br>(-30.9 to -22.4)         | 399,000<br>(367,000 to 439,000)                  | 2,056.1<br>(1,866.8 to 2,268.6)          | 37.0<br>(28.1 to 46.6)           | -22.2<br>(-26.3 to -17.8)         |
| Australia                | 346,000<br>(318,000 to 379,000)                  | 2,359.5<br>(2,149.4 to 2,597.9)          | 33.6<br>(23.2 to 46.1)           | -27.9<br>(-32.9 to -22.3)         | 305,000<br>(278,000 to 340,000)                  | 1,863.6<br>(1,680.2 to 2,070.6)          | 39.2<br>(28.5 to 52.0)           | -22.7<br>(-27.8 to -16.9)         |
| New Zealand              | 103,000<br>(95,000 to 112,000)                   | 3,744.2<br>(3,429.6 to 4,072.3)          | 37.7<br>(27.7 to 48.6)           | -20.6<br>(-26.1 to -15.1)         | 93,900<br>(86,700 to 102,000)                    | 3,087.8<br>(2,833.5 to 3,369.9)          | 30.5<br>(20.4 to 41.4)           | -18.2<br>(-23.4 to -12.9)         |
| High-income Asia Pacific | 3,100,000<br>(2,890,000 to 3,320,000)            | 2,670.2<br>(2,411.7 to 2,943.1)          | 13.6<br>(8.2 to 19.0)            | -28.8<br>(-31.2 to -26.3)         | 2,600,000<br>(2,430,000 to 2,790,000)            | 2,081.2<br>(1,850.5 to 2,320.7)          | 4.8<br>(-1.2 to 10.7)            | -28.6<br>(-31.5 to -25.9)         |
| Brunei Darussalam        | 5,430<br>(4,930 to 6,010)                        | 3,226.9<br>(2,946.5 to 3,530.5)          | 30.3<br>(20.7 to 41.4)           | -11.2<br>(-17.0 to -5.2)          | 4,240<br>(3,800 to 4,700)                        | 2,536.1<br>(2,266.5 to 2,805.2)          | 36.7<br>(27.6 to 47.7)           | -7.6<br>(-13.0 to 1.7)            |

|                           | Male                                  |                                          |                                  |                            | Female                                |                                          |                                  |                            |
|---------------------------|---------------------------------------|------------------------------------------|----------------------------------|----------------------------|---------------------------------------|------------------------------------------|----------------------------------|----------------------------|
|                           | 2019                                  |                                          | Percent change from 1990 to 2019 |                            | 2019                                  |                                          | Percent change from 1990 to 2019 |                            |
|                           | Number of episodes                    | Age standardized incidence (per 100,000) | Number of episodes               | Age standardized incidence | Number of episodes                    | Age standardized incidence (per 100,000) | Number of episodes               | Age standardized incidence |
| Japan                     | 2,480,000<br>(2,310,000 to 2,650,000) | 2,768.4<br>(2,504.9 to 3,049.7)          | 18.7<br>(13.2 to 24.3)           | -26.0<br>(-28.3 to -23.0)  | 2,090,000<br>(1,940,000 to 2,250,000) | 2,140.4<br>(1,904.9 to 2,380.4)          | 9.3<br>(2.5 to 15.6)             | -25.2<br>(-28.1 to -22.4)  |
| Republic of Korea         | 528,000<br>(481,000 to 576,000)       | 2,282.5<br>(2,029.3 to 2,553.7)          | -7.6<br>(-15.8 to 0.7)           | -25.9<br>(-30.8 to -20.6)  | 442,000<br>(400,000 to 483,000)       | 1,852.0<br>(1,613.1 to 2,113.4)          | -15.2<br>(-22.7 to -7.1)         | -30.1<br>(-35.2 to -24.1)  |
| Singapore                 | 86,800<br>(80,400 to 94,400)          | 3,253.8<br>(2,961.8 to 3,584.8)          | 35.9<br>(24.9 to 50.0)           | -36.0<br>(-40.5 to -31.1)  | 69,100<br>(63,800 to 75,700)          | 2,578.2<br>(2,321.3 to 2,856.4)          | 38.3<br>(28.1 to 49.3)           | -35.2<br>(-39.5 to -30.5)  |
| High-income North America | 6,770,000<br>(6,350,000 to 7,230,000) | 3,577.8<br>(3,298.2 to 3,874.0)          | 11.2<br>(7.4 to 15.4)            | -18.4<br>(-21.2 to -15.3)  | 8,090,000<br>(7,560,000 to 8,620,000) | 3,942.1<br>(3,641.2 to 4,263.8)          | 16.0<br>(13.1 to 19.3)           | -7.7<br>(-10.0 to -4.9)    |
| Canada                    | 564,000<br>(517,000 to 610,000)       | 2,875.0<br>(2,610.1 to 3,183.7)          | 8.3<br>(0.5 to 16.4)             | -27.9<br>(-32.4 to -23.4)  | 682,000<br>(622,000 to 745,000)       | 3,155.6<br>(2,846.9 to 3,472.8)          | 14.0<br>(5.7 to 23.4)            | -22.1<br>(-27.1 to -16.9)  |
| Greenland                 | 1,020<br>(929 to 1,120)               | 3,438.3<br>(3,117.3 to 3,749.0)          | -15.9<br>(-22.6 to -8.2)         | -30.5<br>(-35.5 to -25.3)  | 970<br>(885 to 1,060)                 | 3,522.2<br>(3,209.0 to 3,840.5)          | -17.9<br>(-23.8 to -10.7)        | -32.6<br>(-37.3 to -27.7)  |
| United States of America  | 6,210,000<br>(5,820,000 to 6,630,000) | 3,655.0<br>(3,366.8 to 3,958.0)          | 11.5<br>(7.6 to 15.6)            | -17.5<br>(-20.4 to -14.2)  | 7,410,000<br>(6,930,000 to 7,890,000) | 4,027.7<br>(3,723.2 to 4,351.5)          | 16.2<br>(12.9 to 19.9)           | -6.1<br>(-8.7 to -3.1)     |
| Southern Latin America    | 1,760,000<br>(1,630,000 to 1,900,000) | 5,277.1<br>(4,863.9 to 5,718.4)          | 26.7<br>(19.1 to 34.1)           | -14.3<br>(-19.0 to -9.3)   | 1,670,000<br>(1,540,000 to 1,830,000) | 4,290.0<br>(3,936.9 to 4,673.1)          | 36.3<br>(27.7 to 45.6)           | -11.5<br>(-16.4 to -6.4)   |

|                | Male                                  |                                          |                                  |                            | Female                                |                                          |                                  |                            |
|----------------|---------------------------------------|------------------------------------------|----------------------------------|----------------------------|---------------------------------------|------------------------------------------|----------------------------------|----------------------------|
|                | 2019                                  |                                          | Percent change from 1990 to 2019 |                            | 2019                                  |                                          | Percent change from 1990 to 2019 |                            |
|                | Number of episodes                    | Age standardized incidence (per 100,000) | Number of episodes               | Age standardized incidence | Number of episodes                    | Age standardized incidence (per 100,000) | Number of episodes               | Age standardized incidence |
| Argentina      | 1,300,000<br>(1,190,000 to 1,410,000) | 5,842.7<br>(5,357.8 to 6,362.5)          | 61.0<br>(48.1 to 73.8)           | 11.4<br>(3.1 to 19.6)      | 1,240,000<br>(1,130,000 to 1,370,000) | 4,676.1<br>(4,277.8 to 5,150.4)          | 71.0<br>(56.6 to 87.1)           | 11.8<br>(3.1 to 21.5)      |
| Chile          | 383,000<br>(352,000 to 419,000)       | 4,234.9<br>(3,875.5 to 4,666.0)          | -22.4<br>(-28.2 to -16.7)        | -52.2<br>(-56.1 to -48.2)  | 357,000<br>(325,000 to 391,000)       | 3,612.9<br>(3,260.0 to 3,994.9)          | -15.2<br>(-22.0 to -8.1)         | -47.9<br>(-52.0 to -43.5)  |
| Uruguay        | 79,800<br>(73,600 to 87,100)          | 4,478.5<br>(4,099.2 to 4,917.8)          | -11.4<br>(-17.0 to -4.6)         | -23.5<br>(-28.2 to -17.8)  | 80,700<br>(75,100 to 87,400)          | 3,640.7<br>(3,334.1 to 3,994.6)          | -3.7<br>(-10.4 to 3.8)           | -23.2<br>(-27.8 to -18.4)  |
| Western Europe | 9,050,000<br>(8,380,000 to 9,760,000) | 2,947.8<br>(2,732.2 to 3,204.7)          | 9.6<br>(5.0 to 13.3)             | -29.0<br>(-30.9 to -27.1)  | 7,350,000<br>(6,840,000 to 7,890,000) | 2,041.1<br>(1,863.7 to 2,234.9)          | -1.3<br>(-4.6 to 2.9)            | -28.9<br>(-30.8 to -26.8)  |
| Andorra        | 1,300<br>(1,170 to 1,430)             | 2,563.5<br>(2,327.2 to 2,822.8)          | 62.6<br>(48.9 to 78.2)           | -22.5<br>(-27.7 to -16.7)  | 1,010<br>(917 to 1,120)               | 1,938.6<br>(1,738.2 to 2,145.0)          | 76.9<br>(62.8 to 93.2)           | -26.1<br>(-30.6 to -20.8)  |
| Austria        | 160,000<br>(144,000 to 177,000)       | 2,925.4<br>(2,627.8 to 3,218.8)          | 2.5<br>(-6.0 to 11.0)            | -29.0<br>(-34.2 to -24.1)  | 127,000<br>(114,000 to 139,000)       | 2,081.1<br>(1,866.0 to 2,317.8)          | -12.7<br>(-20.8 to -4.0)         | -27.6<br>(-32.7 to -22.6)  |
| Belgium        | 320,000<br>(293,000 to 352,000)       | 3,951.2<br>(3,634.5 to 4,329.5)          | 32.8<br>(21.9 to 46.8)           | -13.8<br>(-19.7 to -6.1)   | 274,000<br>(249,000 to 307,000)       | 2,779.6<br>(2,531.7 to 3,093.3)          | 30.0<br>(17.5 to 45.4)           | -11.4<br>(-17.7 to -3.6)   |
| Cyprus         | 16,300<br>(15,000 to 17,900)          | 2,320.0<br>(2,131.8 to 2,557.2)          | 34.1<br>(23.0 to 46.8)           | -33.0<br>(-37.6 to -27.6)  | 12,600<br>(11,400 to 13,700)          | 1,692.5<br>(1,519.3 to 1,870.7)          | 25.3<br>(15.9 to 35.4)           | -37.0<br>(-41.2 to -32.8)  |

|         | Male                                  |                                          |                                  |                            | Female                                |                                          |                                  |                            |
|---------|---------------------------------------|------------------------------------------|----------------------------------|----------------------------|---------------------------------------|------------------------------------------|----------------------------------|----------------------------|
|         | 2019                                  |                                          | Percent change from 1990 to 2019 |                            | 2019                                  |                                          | Percent change from 1990 to 2019 |                            |
|         | Number of episodes                    | Age standardized incidence (per 100,000) | Number of episodes               | Age standardized incidence | Number of episodes                    | Age standardized incidence (per 100,000) | Number of episodes               | Age standardized incidence |
| Denmark | 123,000<br>(111,000 to 136,000)       | 3,119.5<br>(2,843.8 to 3,460.1)          | 6.7<br>(-2.7 to 18.1)            | -24.4<br>(-30.2 to -18.1)  | 99,700<br>(90,400 to 109,000)         | 2,251.3<br>(2,027.3 to 2,498.7)          | -6.8<br>(-14.8 to 1.7)           | -26.9<br>(-31.7 to -22.2)  |
| Finland | 98,000<br>(89,500 to 108,000)         | 2,777.7<br>(2,512.1 to 3,079.2)          | -28.8<br>(-34.6 to 22.3)         | -50.5<br>(-54.2 to 46.5)   | 76,200<br>(68,100 to 84,100)          | 1,981.3<br>(1,759.6 to 2,231.1)          | -41.4<br>(-46.5 to 35.3)         | -46.8<br>(-50.9 to 42.4)   |
| France  | 1,350,000<br>(1,230,000 to 1,490,000) | 2,945.4<br>(2,686.5 to 3,236.1)          | 6.6<br>(-2.5 to 16.4)            | -29.7<br>(-34.9 to 24.7)   | 1,150,000<br>(1,050,000 to 1,250,000) | 2,026.1<br>(1,835.8 to 2,246.0)          | 12.0<br>(2.8 to 22.6)            | -23.8<br>(-28.5 to 18.7)   |
| Germany | 1,750,000<br>(1,580,000 to 1,930,000) | 2,887.6<br>(2,620.0 to 3,184.7)          | 9.5<br>(-0.2 to 20.6)            | -27.2<br>(-32.2 to 21.2)   | 1,310,000<br>(1,190,000 to 1,420,000) | 1,973.0<br>(1,779.9 to 2,178.3)          | -8.6<br>(-17.0 to 0.8)           | -24.7<br>(-30.0 to 19.4)   |
| Greece  | 248,000<br>(222,000 to 277,000)       | 3,135.4<br>(2,855.8 to 3,484.4)          | 7.7<br>(-2.3 to 20.4)            | -24.1<br>(-29.5 to 17.0)   | 204,000<br>(185,000 to 224,000)       | 2,345.5<br>(2,130.2 to 2,588.1)          | 12.9<br>(3.2 to 23.5)            | -21.3<br>(-26.1 to 16.2)   |
| Iceland | 6,670<br>(6,110 to 7,290)             | 3,102.7<br>(2,839.3 to 3,386.6)          | 20.7<br>(10.4 to 32.3)           | -29.4<br>(-34.6 to 23.8)   | 5,250<br>(4,820 to 5,700)             | 2,251.8<br>(2,049.8 to 2,462.6)          | -3.1<br>(-10.8 to 4.4)           | -40.2<br>(-44.2 to 36.3)   |
| Ireland | 82,600<br>(75,300 to 89,400)          | 2,904.1<br>(2,646.9 to 3,174.5)          | -8.3<br>(-16.7 to 0.4)           | -43.7<br>(-48.5 to 38.7)   | 71,400<br>(65,400 to 78,800)          | 2,215.8<br>(2,019.3 to 2,445.7)          | -7.9<br>(-14.8 to 0.3)           | -41.3<br>(-45.1 to 37.2)   |
| Israel  | 136,000<br>(124,000 to 151,000)       | 2,694.5<br>(2,466.0 to 2,984.0)          | 77.0<br>(62.5 to 95.1)           | -18.3<br>(-24.5 to 10.8)   | 102,000<br>(91,600 to 114,000)        | 1,813.4<br>(1,633.5 to 2,034.8)          | 64.0<br>(51.7 to 77.9)           | -26.1<br>(-31.0 to 21.0)   |

|             | Male                                  |                                          |                                  |                            | Female                              |                                          |                                  |                            |
|-------------|---------------------------------------|------------------------------------------|----------------------------------|----------------------------|-------------------------------------|------------------------------------------|----------------------------------|----------------------------|
|             | 2019                                  |                                          | Percent change from 1990 to 2019 |                            | 2019                                |                                          | Percent change from 1990 to 2019 |                            |
|             | Number of episodes                    | Age standardized incidence (per 100,000) | Number of episodes               | Age standardized incidence | Number of episodes                  | Age standardized incidence (per 100,000) | Number of episodes               | Age standardized incidence |
| Italy       | 1,360,000<br>(1,270,000 to 1,470,000) | 2,903.0<br>(2,699.0 to 3,145.5)          | 37.1<br>(30.3 to 43.8)           | -17.8<br>(-20.8 to 14.7)   | 1,050,000<br>(971,000 to 1,130,000) | 1,865.5<br>(1,713.0 to 2,043.5)          | 28.6<br>(21.9 to 35.1)           | -22.1<br>(-24.8 to 19.2)   |
| Luxembourg  | 9,790<br>(8,850 to 10,900)            | 2,698.3<br>(2,449.8 to 2,983.3)          | 42.5<br>(30.0 to 55.2)           | -26.3<br>(-31.9 to 20.4)   | 7,810<br>(7,130 to 8,570)           | 1,910.9<br>(1,732.7 to 2,124.1)          | 26.6<br>(15.0 to 39.5)           | -24.9<br>(-30.1 to 19.6)   |
| Malta       | 11,000<br>(9,960 to 12,300)           | 3,540.8<br>(3,240.5 to 3,883.9)          | 28.3<br>(15.1 to 43.9)           | -28.3<br>(-34.0 to 21.8)   | 8,890<br>(8,020 to 9,790)           | 2,549.5<br>(2,306.8 to 2,815.9)          | 17.1<br>(7.8 to 28.8)            | -31.4<br>(-35.8 to 26.1)   |
| Monaco      | 1,030<br>(930 to 1,150)               | 3,248.8<br>(2,953.4 to 3,580.4)          | 24.8<br>(11.4 to 37.2)           | -16.2<br>(-22.3 to -9.9)   | 871<br>(783 to 970)                 | 2,336.6<br>(2,120.6 to 2,573.7)          | 13.1<br>(1.9 to 24.4)            | -14.3<br>(-20.1 to 7.9)    |
| Netherlands | 288,000<br>(258,000 to 321,000)       | 2,465.4<br>(2,214.1 to 2,743.7)          | 17.8<br>(6.7 to 29.1)            | -26.5<br>(-32.8 to 20.9)   | 239,000<br>(217,000 to 262,000)     | 1,777.1<br>(1,611.5 to 1,964.2)          | 6.5<br>(-2.0 to 15.4)            | -24.3<br>(-29.1 to 19.1)   |
| Norway      | 121,000<br>(111,000 to 130,000)       | 3,553.8<br>(3,264.1 to 3,864.2)          | -20.1<br>(-23.9 to 16.6)         | -40.4<br>(-42.8 to 38.1)   | 94,800<br>(87,900 to 102,000)       | 2,415.6<br>(2,202.9 to 2,654.2)          | -31.5<br>(-35.1 to 27.8)         | -41.3<br>(-43.8 to 38.7)   |
| Portugal    | 325,000<br>(295,000 to 358,000)       | 4,159.3<br>(3,794.9 to 4,576.2)          | 0.5<br>(-8.1 to 11.0)            | -33.8<br>(-38.4 to 28.4)   | 256,000<br>(231,000 to 279,000)     | 2,584.1<br>(2,345.6 to 2,841.6)          | 8.9<br>(-2.8 to 19.3)            | -32.8<br>(-37.8 to 28.0)   |
| San Marino  | 620<br>(559 to 687)                   | 2,798.7<br>(2,533.4 to 3,093.2)          | 39.5<br>(27.4 to 53.4)           | -22.8<br>(-28.3 to 17.3)   | 445<br>(404 to 488)                 | 1,850.7<br>(1,655.2 to 2,044.7)          | 42.3<br>(30.5 to 54.7)           | -18.5<br>(-23.5 to 13.5)   |

|                                    | Male                                             |                                          |                                  |                                   | Female                                           |                                          |                                  |                                   |
|------------------------------------|--------------------------------------------------|------------------------------------------|----------------------------------|-----------------------------------|--------------------------------------------------|------------------------------------------|----------------------------------|-----------------------------------|
|                                    | 2019                                             |                                          | Percent change from 1990 to 2019 |                                   | 2019                                             |                                          | Percent change from 1990 to 2019 |                                   |
|                                    | Number of episodes                               | Age standardized incidence (per 100,000) | Number of episodes               | Age standardized incidence        | Number of episodes                               | Age standardized incidence (per 100,000) | Number of episodes               | Age standardized incidence        |
| Spain                              | 823,000<br>(748,000 to 896,000)                  | 2,592.9<br>(2,367.5 to 2,830.9)          | 18.1<br>(7.4 to 29.0)            | -27.3<br>(-32.9 to -21.8)         | 672,000<br>(615,000 to 743,000)                  | 1,779.2<br>(1,597.1 to 1,979.0)          | 20.3<br>(7.9 to 33.9)            | -25.1<br>(-30.5 to -19.2)         |
| Sweden                             | 227,000<br>(209,000 to 248,000)                  | 3,320.4<br>(3,007.8 to 3,678.3)          | -12.2<br>(-18.2 to 5.3)          | -30.5<br>(-34.7 to -26.0)         | 177,000<br>(163,000 to 194,000)                  | 2,522.7<br>(2,259.8 to 2,816.8)          | -18.9<br>(-24.7 to 12.9)         | -27.3<br>(-31.7 to 23.3)          |
| Switzerland                        | 124,000<br>(113,000 to 135,000)                  | 2,114.5<br>(1,922.6 to 2,319.8)          | -1.7<br>(-11.8 to 7.7)           | -39.1<br>(-44.5 to -34.2)         | 99,200<br>(89,700 to 109,000)                    | 1,485.3<br>(1,338.8 to 1,647.4)          | -12.9<br>(-21.0 to 3.5)          | -37.8<br>(-42.5 to -33.1)         |
| United Kingdom                     | 1,470,000<br>(1,370,000 to 1,580,000)            | 3,137.8<br>(2,922.7 to 3,391.1)          | -3.5<br>(-6.8 to 0.4)            | -36.8<br>(-38.3 to -35.0)         | 1,310,000<br>(1,210,000 to 1,400,000)            | 2,353.6<br>(2,184.4 to 2,545.1)          | -24.5<br>(-26.9 to 22.3)         | -39.3<br>(-40.8 to 38.0)          |
| <b>Latin America and Caribbean</b> | <b>20,700,000<br/>(19,400,000 to 22,100,000)</b> | <b>7,718.1<br/>(7,213.4 to 8,238.2)</b>  | <b>29.1<br/>(22.9 to 35.4)</b>   | <b>-24.7<br/>(-26.5 to -22.8)</b> | <b>20,500,000<br/>(19,200,000 to 21,900,000)</b> | <b>6,813.4<br/>(6,370.4 to 7,297.4)</b>  | <b>28.4<br/>(22.3 to 34.9)</b>   | <b>-32.2<br/>(-33.6 to -30.8)</b> |
| Andean Latin America               | 2,790,000<br>(2,590,000 to 3,010,000)            | 9,789.2<br>(9,105.8 to 10,542.8)         | 33.6<br>(25.2 to 43.6)           | -26.7<br>(-31.1 to -21.3)         | 2,610,000<br>(2,410,000 to 2,820,000)            | 8,749.2<br>(8,078.3 to 9,509.9)          | 33.2<br>(24.4 to 42.4)           | -32.4<br>(-36.3 to -28.2)         |
| Bolivia (Plurinational State of)   | 470,000<br>(431,000 to 511,000)                  | 9,272.0<br>(8,515.6 to 10,048.0)         | 28.3<br>(17.3 to 39.4)           | -30.8<br>(-35.4 to -25.3)         | 416,000<br>(379,000 to 454,000)                  | 8,089.9<br>(7,389.9 to 8,846.3)          | 19.4<br>(10.9 to 30.1)           | -37.1<br>(-41.5 to 31.7)          |
| Ecuador                            | 593,000<br>(550,000 to 642,000)                  | 7,793.9<br>(7,238.1 to 8,444.4)          | 30.5<br>(20.9 to 40.6)           | -29.0<br>(-34.2 to 23.5)          | 648,000<br>(598,000 to 705,000)                  | 8,105.1<br>(7,472.1 to 8,834.3)          | 44.5<br>(32.1 to 58.4)           | -29.4<br>(-35.2 to 22.5)          |

|                     | Male                                  |                                          |                                  |                            | Female                                |                                          |                                  |                            |
|---------------------|---------------------------------------|------------------------------------------|----------------------------------|----------------------------|---------------------------------------|------------------------------------------|----------------------------------|----------------------------|
|                     | 2019                                  |                                          | Percent change from 1990 to 2019 |                            | 2019                                  |                                          | Percent change from 1990 to 2019 |                            |
|                     | Number of episodes                    | Age standardized incidence (per 100,000) | Number of episodes               | Age standardized incidence | Number of episodes                    | Age standardized incidence (per 100,000) | Number of episodes               | Age standardized incidence |
| Peru                | 1,730,000<br>(1,590,000 to 1,880,000) | 10,806.1<br>(9,892.9 to 11,769.2)        | 36.2<br>(24.0 to 50.8)           | -24.8<br>(-31.6 to -17.0)  | 1,540,000<br>(1,400,000 to 1,690,000) | 9,203.3<br>(8,318.7 to 10,128.1)         | 32.9<br>(20.6 to 46.1)           | -32.3<br>(-38.2 to -26.4)  |
| Caribbean           | 1,580,000<br>(1,470,000 to 1,700,000) | 6,809.9<br>(6,349.0 to 7,338.7)          | 21.9<br>(16.5 to 28.1)           | -20.6<br>(-23.4 to -17.5)  | 1,540,000<br>(1,430,000 to 1,660,000) | 6,019.0<br>(5,604.6 to 6,497.1)          | 16.2<br>(10.8 to 22.2)           | -29.2<br>(-31.9 to -26.1)  |
| Antigua and Barbuda | 2,610<br>(2,380 to 2,850)             | 6,243.7<br>(5,709.7 to 6,824.8)          | 29.7<br>(19.3 to 42.6)           | -20.9<br>(-27.2 to -13.9)  | 2,690<br>(2,450 to 2,930)             | 5,718.1<br>(5,229.6 to 6,227.0)          | 10.2<br>(1.7 to 19.6)            | -24.4<br>(-29.8 to -18.4)  |
| Bahamas             | 9,200<br>(8,470 to 9,950)             | 5,507.2<br>(5,072.7 to 5,977.4)          | 29.3<br>(20.1 to 38.8)           | -31.5<br>(-36.5 to -26.4)  | 8,920<br>(8,130 to 9,720)             | 4,649.5<br>(4,239.8 to 5,080.1)          | 20.3<br>(11.1 to 31.2)           | -36.5<br>(-41.5 to -30.6)  |
| Barbados            | 11,900<br>(10,800 to 13,000)          | 6,752.7<br>(6,203.0 to 7,357.4)          | 24.0<br>(12.2 to 36.9)           | -16.2<br>(-22.8 to -9.3)   | 12,600<br>(11,300 to 13,800)          | 5,857.9<br>(5,326.6 to 6,418.4)          | 13.6<br>(3.1 to 26.0)            | -18.8<br>(-25.2 to -11.6)  |
| Belize              | 10,700<br>(9,770 to 11,600)           | 6,596.0<br>(6,036.2 to 7,186.2)          | 79.0<br>(63.7 to 95.2)           | -18.9<br>(-25.0 to -12.3)  | 9,050<br>(8,330 to 9,810)             | 5,760.3<br>(5,311.9 to 6,261.2)          | 51.9<br>(40.6 to 65.2)           | -32.8<br>(-37.8 to -27.1)  |
| Bermuda             | 1,880<br>(1,700 to 2,060)             | 4,696.5<br>(4,244.7 to 5,128.5)          | 16.8<br>(6.6 to 27.7)            | -25.5<br>(-30.7 to -20.1)  | 2,220<br>(1,990 to 2,440)             | 4,287.8<br>(3,884.4 to 4,738.5)          | 7.3<br>(-3.0 to 18.2)            | -34.1<br>(-39.1 to -28.8)  |
| Cuba                | 491,000<br>(448,000 to 541,000)       | 6,626.8<br>(6,080.8 to 7,276.4)          | 30.4<br>(19.6 to 43.1)           | -11.5<br>(-18.2 to -4.2)   | 486,000<br>(437,000 to 544,000)       | 5,803.5<br>(5,272.4 to 6,436.4)          | 29.7<br>(15.8 to 44.9)           | -21.2<br>(-28.4 to -13.5)  |



|                       | Male                            |                                          |                                  |                            | Female                          |                                          |                                  |                            |
|-----------------------|---------------------------------|------------------------------------------|----------------------------------|----------------------------|---------------------------------|------------------------------------------|----------------------------------|----------------------------|
|                       | 2019                            |                                          | Percent change from 1990 to 2019 |                            | 2019                            |                                          | Percent change from 1990 to 2019 |                            |
|                       | Number of episodes              | Age standardized incidence (per 100,000) | Number of episodes               | Age standardized incidence | Number of episodes              | Age standardized incidence (per 100,000) | Number of episodes               | Age standardized incidence |
| Dominica              | 2,330<br>(2,130 to 2,540)       | 6,197.1<br>(5,692.9 to 6,750.3)          | -11.7<br>(-19.3 to -3.0)         | -23.7<br>(-29.8 to -17.0)  | 2,050<br>(1,870 to 2,270)       | 5,062.7<br>(4,619.5 to 5,564.8)          | -33.6<br>(-39.4 to -27.3)        | -32.8<br>(-38.1 to -27.2)  |
| Dominican Republic    | 319,000<br>(293,000 to 351,000) | 6,557.3<br>(5,999.0 to 7,203.4)          | 31.0<br>(20.0 to 43.8)           | -17.8<br>(-24.4 to -10.7)  | 291,000<br>(266,000 to 316,000) | 5,813.0<br>(5,302.3 to 6,319.4)          | 22.7<br>(12.7 to 34.7)           | -28.1<br>(-33.8 to -21.8)  |
| Grenada               | 3,520<br>(3,210 to 3,840)       | 7,464.4<br>(6,842.3 to 8,105.5)          | -0.1<br>(-8.9 to 8.5)            | -23.1<br>(-28.6 to -17.5)  | 3,470<br>(3,160 to 3,810)       | 6,508.9<br>(5,941.6 to 7,115.6)          | -21.1<br>(-27.6 to -14.0)        | -33.1<br>(-38.3 to -27.6)  |
| Guyana                | 20,500<br>(18,800 to 22,200)    | 6,592.2<br>(6,069.6 to 7,129.5)          | -10.1<br>(-17.7 to -2.6)         | -23.2<br>(-29.6 to -16.9)  | 18,000<br>(16,400 to 19,900)    | 5,385.9<br>(4,916.3 to 5,926.1)          | -17.2<br>(-24.4 to -9.6)         | -33.0<br>(-39.3 to -26.7)  |
| Haiti                 | 392,000<br>(357,000 to 427,000) | 8,869.1<br>(8,117.3 to 9,702.0)          | 27.6<br>(18.7 to 36.7)           | -27.6<br>(-32.2 to -22.2)  | 384,000<br>(352,000 to 418,000) | 8,186.8<br>(7,489.7 to 8,920.7)          | 18.0<br>(10.2 to 26.7)           | -33.5<br>(-38.1 to -28.4)  |
| Jamaica               | 75,000<br>(68,500 to 81,900)    | 5,494.4<br>(4,992.5 to 6,011.7)          | 4.1<br>(-4.5 to 12.3)            | -21.7<br>(-27.9 to -15.7)  | 71,000<br>(64,600 to 77,800)    | 4,789.2<br>(4,349.3 to 5,256.2)          | -9.2<br>(-16.3 to 0.4)           | -31.4<br>(-36.8 to -24.9)  |
| Puerto Rico           | 121,000<br>(109,000 to 136,000) | 5,257.8<br>(4,767.3 to 5,825.3)          | -11.8<br>(-19.0 to -2.6)         | -35.9<br>(-40.7 to -30.5)  | 136,000<br>(124,000 to 150,000) | 4,720.5<br>(4,303.6 to 5,169.9)          | -7.1<br>(-15.9 to 1.7)           | -39.3<br>(-43.8 to -34.2)  |
| Saint Kitts and Nevis | 1,740<br>(1,570 to 1,920)       | 6,301.5<br>(5,734.4 to 6,879.4)          | 13.5<br>(4.0 to 23.7)            | -28.3<br>(-33.8 to -22.7)  | 1,590<br>(1,460 to 1,740)       | 5,348.0<br>(4,911.4 to 5,803.3)          | -13.8<br>(-21.2 to -4.3)         | -40.3<br>(-44.8 to -34.8)  |

|                                  | Male                                  |                                          |                                  |                            | Female                                |                                          |                                  |                            |
|----------------------------------|---------------------------------------|------------------------------------------|----------------------------------|----------------------------|---------------------------------------|------------------------------------------|----------------------------------|----------------------------|
|                                  | 2019                                  |                                          | Percent change from 1990 to 2019 |                            | 2019                                  |                                          | Percent change from 1990 to 2019 |                            |
|                                  | Number of episodes                    | Age standardized incidence (per 100,000) | Number of episodes               | Age standardized incidence | Number of episodes                    | Age standardized incidence (per 100,000) | Number of episodes               | Age standardized incidence |
| Saint Lucia                      | 5,960<br>(5,490 to 6,450)             | 6,811.9<br>(6,272.2 to 7,382.2)          | 39.6<br>(27.4 to 52.6)           | -17.4<br>(-23.4 to -11.2)  | 5,720<br>(5,210 to 6,200)             | 5,758.1<br>(5,281.8 to 6,238.9)          | 21.5<br>(11.7 to 32.9)           | -28.2<br>(-33.3 to -22.7)  |
| Saint Vincent and the Grenadines | 3,850<br>(3,500 to 4,210)             | 6,348.8<br>(5,797.0 to 6,918.5)          | 22.9<br>(11.3 to 35.3)           | -14.8<br>(-22.0 to -7.7)   | 3,280<br>(2,990 to 3,610)             | 5,574.9<br>(5,079.9 to 6,119.0)          | -0.5<br>(-9.5 to 9.2)            | -20.5<br>(-27.5 to -13.5)  |
| Suriname                         | 15,100<br>(13,800 to 16,300)          | 5,675.8<br>(5,202.0 to 6,115.8)          | 42.4<br>(31.4 to 53.4)           | -16.7<br>(-22.9 to -10.4)  | 14,200<br>(12,900 to 15,600)          | 4,695.0<br>(4,279.9 to 5,158.1)          | 34.8<br>(24.0 to 48.5)           | -28.5<br>(-34.7 to -21.3)  |
| Trinidad and Tobago              | 35,800<br>(32,600 to 38,800)          | 4,865.0<br>(4,421.7 to 5,270.3)          | -7.8<br>(-15.5 to 0.9)           | -38.5<br>(-43.3 to -32.9)  | 32,000<br>(29,400 to 34,900)          | 4,096.2<br>(3,746.3 to 4,480.8)          | -14.3<br>(-21.3 to -7.0)         | -44.0<br>(-48.2 to -39.2)  |
| United States Virgin Islands     | 3,010<br>(2,720 to 3,320)             | 4,994.9<br>(4,539.0 to 5,449.6)          | 15.0<br>(5.4 to 25.1)            | -16.7<br>(-22.1 to -11.4)  | 3,170<br>(2,840 to 3,520)             | 4,284.6<br>(3,871.4 to 4,712.0)          | 10.2<br>(0.8 to 21.7)            | -28.4<br>(-32.7 to -23.0)  |
| Central Latin America            | 6,690,000<br>(6,260,000 to 7,160,000) | 6,000.8<br>(5,615.0 to 6,427.2)          | 19.7<br>(13.4 to 26.3)           | -30.3<br>(-32.3 to -28.4)  | 6,720,000<br>(6,280,000 to 7,230,000) | 5,477.5<br>(5,102.5 to 5,906.7)          | 16.4<br>(10.4 to 23.2)           | -39.3<br>(-41.0 to -37.6)  |
| Colombia                         | 1,310,000<br>(1,200,000 to 1,420,000) | 5,637.4<br>(5,156.0 to 6,166.6)          | 28.0<br>(16.0 to 41.7)           | -28.2<br>(-34.2 to -21.9)  | 1,370,000<br>(1,240,000 to 1,500,000) | 5,206.0<br>(4,721.8 to 5,753.9)          | 25.0<br>(13.7 to 38.0)           | -39.7<br>(-44.4 to -34.6)  |
| Costa Rica                       | 162,000<br>(147,000 to 177,000)       | 7,234.3<br>(6,587.1 to 7,939.8)          | 60.9<br>(44.6 to 76.5)           | -10.0<br>(-17.9 to -2.9)   | 150,000<br>(136,000 to 166,000)       | 6,062.7<br>(5,456.9 to 6,734.7)          | 46.8<br>(35.0 to 61.6)           | -27.3<br>(-32.8 to -21.3)  |

|                                    | Male                                   |                                          |                                  |                            | Female                                 |                                          |                                  |                            |
|------------------------------------|----------------------------------------|------------------------------------------|----------------------------------|----------------------------|----------------------------------------|------------------------------------------|----------------------------------|----------------------------|
|                                    | 2019                                   |                                          | Percent change from 1990 to 2019 |                            | 2019                                   |                                          | Percent change from 1990 to 2019 |                            |
|                                    | Number of episodes                     | Age standardized incidence (per 100,000) | Number of episodes               | Age standardized incidence | Number of episodes                     | Age standardized incidence (per 100,000) | Number of episodes               | Age standardized incidence |
| El Salvador                        | 244,000<br>(223,000 to 268,000)        | 9,042.1<br>(8,248.6 to 9,942.4)          | 6.2<br>(-3.8 to 17.2)            | -16.1<br>(-23.4 to -8.4)   | 277,000<br>(253,000 to 302,000)        | 8,202.2<br>(7,471.9 to 8,958.2)          | 10.0<br>(0.4 to 20.7)            | -29.3<br>(-34.7 to 22.8)   |
| Guatemala                          | 661,000<br>(607,000 to 715,000)        | 10,233.5<br>(9,423.1 to 11,064.5)        | 16.3<br>(4.6 to 27.3)            | -42.5<br>(-47.3 to 37.9)   | 652,000<br>(600,000 to 717,000)        | 9,186.4<br>(8,412.8 to 10,108.9)         | 12.4<br>(-0.6 to 24.0)           | -52.0<br>(-56.2 to 47.9)   |
| Honduras                           | 266,000<br>(241,000 to 291,000)        | 7,124.7<br>(6,466.6 to 7,767.9)          | 34.9<br>(23.0 to 47.4)           | -23.4<br>(-30.2 to 17.2)   | 253,000<br>(227,000 to 281,000)        | 6,479.8<br>(5,850.4 to 7,228.7)          | 24.7<br>(11.9 to 38.8)           | -34.9<br>(-41.1 to 27.7)   |
| Mexico                             | 2,900,000<br>(2,700,000 to 3,110,000)  | 5,221.6<br>(4,877.5 to 5,590.7)          | 7.5<br>(2.0 to 13.4)             | -36.0<br>(-37.8 to 34.1)   | 2,870,000<br>(2,670,000 to 3,090,000)  | 4,783.0<br>(4,450.1 to 5,150.7)          | 4.9<br>(-1.3 to 11.2)            | -43.3<br>(-45.2 to 41.4)   |
| Nicaragua                          | 169,000<br>(155,000 to 186,000)        | 6,449.1<br>(5,929.5 to 7,037.5)          | 10.6<br>(0.9 to 22.4)            | -25.6<br>(-31.0 to 19.7)   | 170,000<br>(155,000 to 188,000)        | 6,122.2<br>(5,556.5 to 6,732.5)          | 3.9<br>(-6.2 to 15.8)            | -33.4<br>(-38.8 to 27.3)   |
| Panama                             | 143,000<br>(132,000 to 157,000)        | 7,090.1<br>(6,511.1 to 7,749.1)          | 103.9<br>(86.9 to 122.1)         | -0.5<br>(-8.6 to 8.2)      | 134,000<br>(122,000 to 146,000)        | 6,352.2<br>(5,780.6 to 6,939.2)          | 90.6<br>(75.5 to 108.3)          | -13.9<br>(-20.9 to 6.3)    |
| Venezuela (Bolivarian Republic of) | 846,000<br>(773,000 to 920,000)        | 6,465.9<br>(5,901.4 to 7,035.1)          | 51.3<br>(38.1 to 65.4)           | -15.0<br>(-21.2 to -8.0)   | 847,000<br>(777,000 to 934,000)        | 5,829.4<br>(5,341.1 to 6,439.3)          | 48.6<br>(34.8 to 65.3)           | -25.5<br>(-31.6 to 18.3)   |
| Tropical Latin America             | 9,670,000<br>(9,040,000 to 10,300,000) | 9,137.1<br>(8,539.5 to 9,778.8)          | 36.6<br>(28.8 to 44.2)           | -20.9<br>(-23.6 to 18.0)   | 9,650,000<br>(9,010,000 to 10,300,000) | 7,866.1<br>(7,334.9 to 8,420.1)          | 39.3<br>(31.2 to 47.6)           | -27.1<br>(-29.4 to 24.7)   |

|                                     | Male                                             |                                          |                                  |                                   | Female                                           |                                          |                                  |                                   |
|-------------------------------------|--------------------------------------------------|------------------------------------------|----------------------------------|-----------------------------------|--------------------------------------------------|------------------------------------------|----------------------------------|-----------------------------------|
|                                     | 2019                                             |                                          | Percent change from 1990 to 2019 |                                   | 2019                                             |                                          | Percent change from 1990 to 2019 |                                   |
|                                     | Number of episodes                               | Age standardized incidence (per 100,000) | Number of episodes               | Age standardized incidence        | Number of episodes                               | Age standardized incidence (per 100,000) | Number of episodes               | Age standardized incidence        |
| Brazil                              | 9,460,000<br>(8,840,000 to 10,100,000)           | 9,198.4<br>(8,595.6 to 9,847.3)          | 36.5<br>(28.8 to 44.2)           | -21.1<br>(-23.7 to -18.2)         | 9,470,000<br>(8,850,000 to 10,100,000)           | 7,920.4<br>(7,389.6 to 8,472.5)          | 39.7<br>(31.6 to 48.0)           | -27.2<br>(-29.5 to -24.8)         |
| Paraguay                            | 204,000<br>(188,000 to 221,000)                  | 6,719.7<br>(6,200.8 to 7,274.9)          | 39.7<br>(28.6 to 51.1)           | -17.1<br>(-23.2 to -10.8)         | 173,000<br>(159,000 to 189,000)                  | 5,518.2<br>(5,072.9 to 6,021.0)          | 20.2<br>(10.7 to 29.9)           | -30.0<br>(-35.1 to -24.6)         |
| <b>North Africa and Middle East</b> | <b>17,800,000<br/>(16,600,000 to 19,200,000)</b> | <b>6,653.1<br/>(6,201.2 to 7,134.1)</b>  | <b>18.4<br/>(12.0 to 25.4)</b>   | <b>-27.3<br/>(-29.5 to -25.0)</b> | <b>16,400,000<br/>(15,100,000 to 17,700,000)</b> | <b>6,365.7<br/>(5,919.7 to 6,861.6)</b>  | <b>7.3<br/>(1.2 to 13.6)</b>     | <b>-30.6<br/>(-32.8 to -28.3)</b> |
| Afghanistan                         | 1,220,000<br>(1,090,000 to 1,360,000)            | 7,914.8<br>(7,246.3 to 8,598.5)          | 94.3<br>(79.7 to 109.3)          | -25.9<br>(-31.0 to -20.3)         | 1,330,000<br>(1,180,000 to 1,500,000)            | 8,162.3<br>(7,458.8 to 8,909.8)          | 93.9<br>(80.1 to 109.0)          | -28.4<br>(-33.2 to -23.4)         |
| Algeria                             | 1,100,000<br>(1,010,000 to 1,210,000)            | 5,873.8<br>(5,396.9 to 6,403.9)          | 24.6<br>(14.1 to 35.4)           | -25.7<br>(-30.9 to -20.3)         | 1,060,000<br>(972,000 to 1,150,000)              | 5,824.1<br>(5,351.8 to 6,318.6)          | 12.6<br>(4.3 to 22.5)            | -28.5<br>(-32.7 to -23.7)         |
| Bahrain                             | 36,100<br>(32,400 to 39,900)                     | 5,676.6<br>(5,143.6 to 6,227.0)          | 145.8<br>(121.6 to 171.6)        | -19.5<br>(-25.1 to -13.7)         | 24,300<br>(21,900 to 26,800)                     | 5,724.4<br>(5,147.2 to 6,313.8)          | 91.3<br>(75.8 to 108.7)          | -18.4<br>(-23.4 to -13.0)         |
| Egypt                               | 3,890,000<br>(3,560,000 to 4,230,000)            | 8,599.1<br>(7,905.5 to 9,350.2)          | 10.4<br>(1.1 to 21.0)            | -31.3<br>(-36.4 to -25.5)         | 3,110,000<br>(2,840,000 to 3,410,000)            | 7,626.2<br>(6,977.3 to 8,299.9)          | -7.6<br>(-15.3 to 0.2)           | -36.7<br>(-40.9 to -31.7)         |
| Iran (Islamic Republic of)          | 2,060,000<br>(1,920,000 to 2,220,000)            | 5,339.5<br>(4,971.7 to 5,754.8)          | -0.9<br>(-7.4 to 6.2)            | -33.5<br>(-35.6 to -31.3)         | 1,880,000<br>(1,740,000 to 2,030,000)            | 5,044.3<br>(4,670.6 to 5,457.7)          | -10.2<br>(-16.8 to -3.3)         | -35.1<br>(-37.5 to -32.7)         |

|           | Male                                |                                          |                                  |                            | Female                              |                                          |                                  |                            |
|-----------|-------------------------------------|------------------------------------------|----------------------------------|----------------------------|-------------------------------------|------------------------------------------|----------------------------------|----------------------------|
|           | 2019                                |                                          | Percent change from 1990 to 2019 |                            | 2019                                |                                          | Percent change from 1990 to 2019 |                            |
|           | Number of episodes                  | Age standardized incidence (per 100,000) | Number of episodes               | Age standardized incidence | Number of episodes                  | Age standardized incidence (per 100,000) | Number of episodes               | Age standardized incidence |
| Iraq      | 991,000<br>(900,000 to 1,090,000)   | 5,556.6<br>(5,088.5 to 6,078.6)          | 23.1<br>(11.7 to 35.5)           | -38.4<br>(-42.9 to -33.5)  | 981,000<br>(889,000 to 1,080,000)   | 5,523.4<br>(5,071.9 to 6,001.3)          | 24.5<br>(13.3 to 38.0)           | -37.0<br>(-41.6 to -31.6)  |
| Jordan    | 297,000<br>(269,000 to 331,000)     | 5,899.0<br>(5,418.8 to 6,492.7)          | 124.6<br>(107.6 to 144.1)        | -28.8<br>(-34.0 to -22.9)  | 237,000<br>(213,000 to 262,000)     | 5,205.8<br>(4,733.9 to 5,742.0)          | 85.8<br>(71.9 to 102.0)          | -35.3<br>(-39.6 to -30.3)  |
| Kuwait    | 116,000<br>(107,000 to 127,000)     | 6,609.2<br>(6,062.9 to 7,277.9)          | 124.2<br>(108.4 to 143.3)        | -5.1<br>(-11.6 to 1.9)     | 94,700<br>(86,500 to 104,000)       | 6,499.7<br>(5,930.4 to 7,140.1)          | 107.9<br>(90.3 to 126.5)         | -15.5<br>(-21.4 to -9.9)   |
| Lebanon   | 141,000<br>(129,000 to 156,000)     | 5,766.7<br>(5,258.4 to 6,336.8)          | 29.9<br>(20.4 to 41.1)           | -18.6<br>(-24.3 to -12.3)  | 145,000<br>(131,000 to 160,000)     | 5,456.7<br>(4,906.3 to 6,023.9)          | 35.9<br>(25.2 to 47.7)           | -20.3<br>(-25.6 to -14.1)  |
| Libya     | 177,000<br>(162,000 to 192,000)     | 6,074.3<br>(5,581.9 to 6,610.0)          | 12.2<br>(2.1 to 24.0)            | -24.9<br>(-29.5 to -18.7)  | 164,000<br>(150,000 to 178,000)     | 5,896.3<br>(5,362.4 to 6,431.8)          | 6.5<br>(-4.0 to 17.8)            | -25.7<br>(-30.8 to -20.2)  |
| Morocco   | 1,020,000<br>(942,000 to 1,110,000) | 6,371.2<br>(5,865.2 to 6,901.1)          | 0.5<br>(-8.0 to 11.0)            | -27.5<br>(-32.5 to -21.6)  | 1,050,000<br>(962,000 to 1,140,000) | 6,423.6<br>(5,900.3 to 7,000.3)          | -9.0<br>(-16.5 to 0.8)           | -31.3<br>(-35.7 to -26.4)  |
| Oman      | 109,000<br>(98,200 to 120,000)      | 6,347.9<br>(5,763.9 to 6,929.8)          | 40.0<br>(28.4 to 53.6)           | -32.3<br>(-37.5 to -26.9)  | 74,600<br>(67,300 to 82,700)        | 6,255.5<br>(5,721.4 to 6,848.1)          | 5.7<br>(-4.2 to 16.0)            | -33.8<br>(-38.4 to -28.6)  |
| Palestine | 146,000<br>(132,000 to 161,000)     | 7,245.1<br>(6,638.4 to 7,909.0)          | 24.6<br>(14.3 to 35.7)           | -37.3<br>(-41.9 to -32.5)  | 138,000<br>(124,000 to 153,000)     | 6,701.0<br>(6,172.2 to 7,294.1)          | 30.4<br>(17.8 to 42.3)           | -34.2<br>(-39.1 to -29.3)  |

|                      | Male                                  |                                          |                                  |                            | Female                                |                                          |                                  |                            |
|----------------------|---------------------------------------|------------------------------------------|----------------------------------|----------------------------|---------------------------------------|------------------------------------------|----------------------------------|----------------------------|
|                      | 2019                                  |                                          | Percent change from 1990 to 2019 |                            | 2019                                  |                                          | Percent change from 1990 to 2019 |                            |
|                      | Number of episodes                    | Age standardized incidence (per 100,000) | Number of episodes               | Age standardized incidence | Number of episodes                    | Age standardized incidence (per 100,000) | Number of episodes               | Age standardized incidence |
| Qatar                | 68,500<br>(60,800 to 77,200)          | 5,345.3<br>(4,823.8 to 5,922.5)          | 425.4<br>(382.9 to 475.6)        | -18.2<br>(-23.7 to 12.1)   | 28,700<br>(25,600 to 31,900)          | 5,761.5<br>(5,245.3 to 6,260.3)          | 221.3<br>(195.5 to 249.2)        | -20.1<br>(-25.1 to 14.4)   |
| Saudi Arabia         | 1,040,000<br>(949,000 to 1,140,000)   | 6,979.1<br>(6,361.8 to 7,664.6)          | 53.1<br>(39.0 to 69.0)           | -28.8<br>(-34.1 to 23.1)   | 836,000<br>(754,000 to 923,000)       | 7,288.9<br>(6,644.9 to 7,976.3)          | 36.6<br>(23.4 to 51.7)           | -28.6<br>(-33.8 to 22.7)   |
| Sudan                | 1,060,000<br>(957,000 to 1,170,000)   | 6,251.0<br>(5,706.5 to 6,802.7)          | 12.5<br>(3.6 to 22.5)            | -32.5<br>(-37.4 to 27.4)   | 966,000<br>(878,000 to 1,080,000)     | 5,873.9<br>(5,425.3 to 6,404.1)          | 4.1<br>(-4.6 to 12.5)            | -36.5<br>(-40.8 to 32.2)   |
| Syrian Arab Republic | 439,000<br>(402,000 to 477,000)       | 6,725.0<br>(6,166.4 to 7,309.5)          | -17.0<br>(-24.9 to 8.3)          | -16.4<br>(-22.0 to -9.7)   | 412,000<br>(377,000 to 450,000)       | 6,338.4<br>(5,799.1 to 6,887.7)          | -22.3<br>(-30.2 to 13.3)         | -21.4<br>(-26.9 to 15.5)   |
| Tunisia              | 331,000<br>(300,000 to 361,000)       | 5,970.5<br>(5,422.8 to 6,535.0)          | 11.5<br>(1.8 to 22.6)            | -21.9<br>(-27.3 to 16.4)   | 356,000<br>(325,000 to 390,000)       | 6,245.4<br>(5,667.0 to 6,868.9)          | 11.1<br>(0.6 to 22.7)            | -24.4<br>(-30.2 to 17.8)   |
| Turkey               | 2,360,000<br>(2,170,000 to 2,590,000) | 6,130.9<br>(5,611.2 to 6,727.4)          | 8.8<br>(-1.9 to 19.7)            | -22.4<br>(-29.2 to 15.8)   | 2,340,000<br>(2,140,000 to 2,550,000) | 5,729.5<br>(5,256.8 to 6,286.8)          | 3.3<br>(-7.1 to 15.3)            | -28.6<br>(-34.4 to 22.5)   |
| United Arab Emirates | 225,000<br>(201,000 to 251,000)       | 6,632.7<br>(6,052.8 to 7,201.6)          | 324.5<br>(283.1 to 370.5)        | -20.8<br>(-26.0 to 14.7)   | 94,700<br>(84,500 to 105,000)         | 6,297.6<br>(5,738.1 to 6,879.0)          | 157.6<br>(133.8 to 184.3)        | -20.9<br>(-26.4 to 14.8)   |
| Yemen                | 983,000<br>(894,000 to 1,080,000)     | 8,084.9<br>(7,480.0 to 8,873.9)          | 28.4<br>(16.7 to 41.0)           | -29.1<br>(-33.5 to 23.7)   | 1,020,000<br>(918,000 to 1,120,000)   | 8,028.9<br>(7,346.0 to 8,741.5)          | 14.9<br>(5.0 to 26.6)            | -34.4<br>(-39.1 to 29.3)   |

|                                               | Male                                                   |                                                  |                                      |                                         | Female                                                 |                                                 |                                       |                                         |
|-----------------------------------------------|--------------------------------------------------------|--------------------------------------------------|--------------------------------------|-----------------------------------------|--------------------------------------------------------|-------------------------------------------------|---------------------------------------|-----------------------------------------|
|                                               | 2019                                                   |                                                  | Percent change from 1990 to 2019     |                                         | 2019                                                   |                                                 | Percent change from 1990 to 2019      |                                         |
|                                               | Number of episodes                                     | Age standardized incidence (per 100,000)         | Number of episodes                   | Age standardized incidence              | Number of episodes                                     | Age standardized incidence (per 100,000)        | Number of episodes                    | Age standardized incidence              |
| <b>South Asia</b>                             | <b>91,300,000</b><br><b>(84,700,000 to 98,500,000)</b> | <b>11,468.0</b><br><b>(10,682.7 to 12,342.4)</b> | <b>37.6</b><br><b>(31.6 to 43.9)</b> | <b>-19.1</b><br><b>(-21.3 to -17.0)</b> | <b>83,700,000</b><br><b>(78,100,000 to 89,800,000)</b> | <b>10,542.4</b><br><b>(9,844.2 to 11,281.7)</b> | <b>39.0</b><br><b>(33.6 to 44.7)</b>  | <b>-24.1</b><br><b>(-25.9 to -22.3)</b> |
| Bangladesh                                    | 5,710,000<br>(5,230,000 to 6,170,000)                  | 7,811.7<br>(7,192.7 to 8,430.4)                  | -17.3<br>(-23.8 to 9.8)              | -45.9<br>(-50.1 to 41.7)                | 5,020,000<br>(4,620,000 to 5,450,000)                  | 6,926.7<br>(6,382.8 to 7,492.2)                 | -5.4<br>(-13.7 to 3.5)                | -41.7<br>(-46.0 to 36.4)                |
| Bhutan                                        | 23,300<br>(21,300 to 25,500)                           | 6,905.5<br>(6,307.1 to 7,564.4)                  | -16.9<br>(-24.2 to 8.9)              | -35.1<br>(-39.3 to 30.2)                | 20,100<br>(18,400 to 22,000)                           | 6,285.5<br>(5,757.5 to 6,881.9)                 | -18.3<br>(-25.1 to 11.3)              | -38.1<br>(-42.4 to 33.7)                |
| India                                         | 76,600,000<br>(71,000,000 to 82,600,000)               | 12,307.8<br>(11,449.9 to 13,277.9)               | 44.5<br>(38.0 to 51.2)               | -17.2<br>(-19.7 to 14.8)                | 71,800,000<br>(67,000,000 to 77,100,000)               | 11,451.4<br>(10,700.0 to 12,274.5)              | 43.5<br>(37.8 to 49.7)                | -23.6<br>(-25.6 to 21.6)                |
| Nepal                                         | 1,200,000<br>(1,090,000 to 1,310,000)                  | 9,234.6<br>(8,407.7 to 10,038.2)                 | -4.6<br>(-12.5 to 3.7)               | -37.1<br>(-41.9 to 32.0)                | 1,200,000<br>(1,100,000 to 1,320,000)                  | 8,566.0<br>(7,825.1 to 9,364.1)                 | 1.2<br>(-7.4 to 11.5)                 | -40.2<br>(-44.7 to 34.8)                |
| Pakistan                                      | 7,730,000<br>(7,090,000 to 8,440,000)                  | 8,304.8<br>(7,700.4 to 8,914.6)                  | 50.4<br>(44.1 to 57.3)               | -14.5<br>(-17.6 to 11.0)                | 5,680,000<br>(5,190,000 to 6,250,000)                  | 6,136.6<br>(5,669.1 to 6,622.2)                 | 53.9<br>(47.1 to 61.6)                | -18.2<br>(-21.6 to 14.8)                |
| <b>Southeast Asia, East Asia, and Oceania</b> | <b>55,600,000</b><br><b>(51,800,000 to 59,600,000)</b> | <b>5,293.0</b><br><b>(4,909.3 to 5,672.2)</b>    | <b>-3.8</b><br><b>(-8.8 to 1.1)</b>  | <b>-31.0</b><br><b>(-33.4 to 29.0)</b>  | <b>46,700,000</b><br><b>(43,300,000 to 50,200,000)</b> | <b>4,298.9</b><br><b>(3,966.4 to 4,642.0)</b>   | <b>-13.2</b><br><b>(-17.4 to 8.7)</b> | <b>-40.4</b><br><b>(-42.3 to 38.5)</b>  |
| East Asia                                     | 32,600,000<br>(30,200,000 to 35,000,000)               | 4,382.2<br>(4,038.6 to 4,699.0)                  | -14.6<br>(-20.0 to 9.9)              | -37.5<br>(-40.2 to 35.2)                | 26,900,000<br>(24,800,000 to 29,000,000)               | 3,535.3<br>(3,231.4 to 3,850.8)                 | -26.3<br>(-30.5 to 22.0)              | -49.0<br>(-51.3 to 46.8)                |

|                                       | Male                                     |                                          |                                  |                            | Female                                   |                                          |                                  |                            |
|---------------------------------------|------------------------------------------|------------------------------------------|----------------------------------|----------------------------|------------------------------------------|------------------------------------------|----------------------------------|----------------------------|
|                                       | 2019                                     |                                          | Percent change from 1990 to 2019 |                            | 2019                                     |                                          | Percent change from 1990 to 2019 |                            |
|                                       | Number of episodes                       | Age standardized incidence (per 100,000) | Number of episodes               | Age standardized incidence | Number of episodes                       | Age standardized incidence (per 100,000) | Number of episodes               | Age standardized incidence |
| China                                 | 30,700,000<br>(28,400,000 to 33,000,000) | 4,267.0<br>(3,929.5 to 4,587.0)          | -16.2<br>(-21.5 to 11.4)         | -38.5<br>(-41.2 to 36.2)   | 25,200,000<br>(23,200,000 to 27,200,000) | 3,443.1<br>(3,147.9 to 3,753.4)          | -28.0<br>(-32.2 to 23.7)         | -50.0<br>(-52.3 to 47.8)   |
| Democratic People's Republic of Korea | 770,000<br>(702,000 to 837,000)          | 6,580.3<br>(6,033.9 to 7,140.4)          | -1.2<br>(-10.1 to 8.2)           | -24.7<br>(-29.9 to 18.8)   | 805,000<br>(738,000 to 878,000)          | 5,590.9<br>(5,131.2 to 6,109.3)          | -6.0<br>(-13.8 to 2.8)           | -30.9<br>(-35.7 to 25.8)   |
| Taiwan (Province of China)            | 1,140,000<br>(1,040,000 to 1,250,000)    | 8,084.7<br>(7,372.7 to 8,821.6)          | 46.9<br>(33.6 to 62.4)           | -7.1<br>(-14.1 to 0.7)     | 890,000<br>(806,000 to 972,000)          | 6,312.9<br>(5,709.8 to 6,925.8)          | 39.7<br>(27.9 to 52.2)           | -16.9<br>(-21.8 to 11.3)   |
| Oceania                               | 473,000<br>(431,000 to 518,000)          | 8,135.7<br>(7,531.1 to 8,816.7)          | 61.1<br>(53.4 to 69.6)           | -19.8<br>(-23.4 to 15.9)   | 418,000<br>(379,000 to 463,000)          | 7,291.7<br>(6,702.6 to 7,894.9)          | 63.9<br>(56.9 to 72.6)           | -19.3<br>(-22.3 to 15.9)   |
| American Samoa                        | 1,530<br>(1,400 to 1,670)                | 6,064.9<br>(5,557.4 to 6,574.6)          | -4.5<br>(-12.7 to 3.7)           | -21.2<br>(-27.2 to 14.7)   | 1,520<br>(1,390 to 1,660)                | 5,847.7<br>(5,349.1 to 6,377.7)          | 5.2<br>(-2.2 to 12.9)            | -15.0<br>(-20.0 to 9.6)    |
| Cook Islands                          | 759<br>(699 to 825)                      | 7,702.7<br>(7,121.5 to 8,336.9)          | -20.6<br>(-27.5 to 12.8)         | -28.3<br>(-33.5 to 22.7)   | 607<br>(558 to 662)                      | 6,109.2<br>(5,594.4 to 6,667.7)          | -23.6<br>(-30.1 to 16.2)         | -34.8<br>(-39.5 to 29.5)   |
| Fiji                                  | 26,700<br>(24,300 to 29,100)             | 6,544.0<br>(6,021.1 to 7,085.4)          | -4.3<br>(-11.6 to 4.2)           | -24.0<br>(-29.1 to 18.1)   | 22,900<br>(21,100 to 24,800)             | 5,550.6<br>(5,129.3 to 5,989.2)          | -3.3<br>(-10.4 to 4.2)           | -23.1<br>(-27.9 to 18.1)   |
| Guam                                  | 4,860<br>(4,460 to 5,310)                | 5,551.1<br>(5,100.9 to 6,054.7)          | 22.7<br>(13.8 to 32.7)           | -15.9<br>(-21.9 to 10.3)   | 4,340<br>(3,970 to 4,690)                | 4,966.5<br>(4,535.0 to 5,383.6)          | 24.1<br>(15.5 to 33.9)           | -22.0<br>(-27.1 to 16.3)   |



|                                  | Male                            |                                          |                                  |                            | Female                          |                                          |                                  |                            |
|----------------------------------|---------------------------------|------------------------------------------|----------------------------------|----------------------------|---------------------------------|------------------------------------------|----------------------------------|----------------------------|
|                                  | 2019                            |                                          | Percent change from 1990 to 2019 |                            | 2019                            |                                          | Percent change from 1990 to 2019 |                            |
|                                  | Number of episodes              | Age standardized incidence (per 100,000) | Number of episodes               | Age standardized incidence | Number of episodes              | Age standardized incidence (per 100,000) | Number of episodes               | Age standardized incidence |
| Kiribati                         | 3,450<br>(3,160 to 3,800)       | 7,474.4<br>(6,907.6 to 8,162.7)          | 17.3<br>(8.5 to 27.4)            | -18.9<br>(-25.3 to 12.4)   | 3,470<br>(3,150 to 3,810)       | 6,402.9<br>(5,864.6 to 6,954.5)          | 21.3<br>(11.7 to 32.4)           | -20.6<br>(-26.5 to 14.4)   |
| Marshall Islands                 | 1,980<br>(1,820 to 2,170)       | 8,229.4<br>(7,606.9 to 8,926.0)          | -0.7<br>(-8.4 to 7.8)            | -20.5<br>(-26.0 to 14.8)   | 1,760<br>(1,600 to 1,920)       | 7,391.7<br>(6,759.4 to 7,977.7)          | -1.8<br>(-8.7 to 6.2)            | -19.2<br>(-24.1 to 14.2)   |
| Micronesia (Federated States of) | 3,410<br>(3,130 to 3,730)       | 7,902.6<br>(7,292.8 to 8,564.5)          | -29.2<br>(-35.3 to 23.0)         | -24.6<br>(-29.7 to 18.8)   | 3,060<br>(2,800 to 3,350)       | 6,881.3<br>(6,316.6 to 7,445.0)          | -31.0<br>(-36.7 to 24.3)         | -27.3<br>(-32.2 to 21.2)   |
| Nauru                            | 324<br>(294 to 359)             | 7,836.1<br>(7,180.6 to 8,513.1)          | -23.4<br>(-29.3 to 16.7)         | -15.6<br>(-21.3 to -9.3)   | 300<br>(272 to 331)             | 6,683.4<br>(6,173.0 to 7,226.0)          | -21.3<br>(-27.0 to 14.7)         | -17.7<br>(-23.3 to 11.7)   |
| Niue                             | 57<br>(52 to 62)                | 6,646.4<br>(6,110.6 to 7,196.0)          | -40.1<br>(-44.9 to 35.5)         | -22.1<br>(-27.2 to 17.2)   | 53<br>(49 to 58)                | 5,781.1<br>(5,307.8 to 6,258.3)          | -41.2<br>(-44.9 to 37.2)         | -19.2<br>(-23.8 to 14.1)   |
| Northern Mariana Islands         | 1,400<br>(1,260 to 1,530)       | 6,395.9<br>(5,879.5 to 6,973.1)          | -2.9<br>(-11.3 to 8.9)           | -17.5<br>(-22.8 to 11.0)   | 1,030<br>(951 to 1,120)         | 5,276.1<br>(4,861.5 to 5,739.8)          | -15.0<br>(-22.4 to 5.5)          | -21.0<br>(-26.0 to 15.9)   |
| Palau                            | 999<br>(913 to 1,090)           | 10,427.7<br>(9,640.0 to 11,278.8)        | 7.6<br>(-1.3 to 18.2)            | -22.3<br>(-27.5 to 16.2)   | 804<br>(741 to 872)             | 10,172.8<br>(9,399.2 to 10,987.7)        | -10.8<br>(-18.4 to 2.3)          | -23.1<br>(-28.7 to 17.3)   |
| Papua New Guinea                 | 355,000<br>(321,000 to 393,000) | 8,217.4<br>(7,547.7 to 8,984.4)          | 87.3<br>(75.2 to 100.6)          | -19.0<br>(-23.9 to 13.5)   | 314,000<br>(281,000 to 352,000) | 7,493.7<br>(6,856.4 to 8,154.1)          | 91.3<br>(80.3 to 104.3)          | -18.4<br>(-22.8 to 13.2)   |

|                 | Male                                     |                                          |                                  |                            | Female                                   |                                          |                                  |                            |
|-----------------|------------------------------------------|------------------------------------------|----------------------------------|----------------------------|------------------------------------------|------------------------------------------|----------------------------------|----------------------------|
|                 | 2019                                     |                                          | Percent change from 1990 to 2019 |                            | 2019                                     |                                          | Percent change from 1990 to 2019 |                            |
|                 | Number of episodes                       | Age standardized incidence (per 100,000) | Number of episodes               | Age standardized incidence | Number of episodes                       | Age standardized incidence (per 100,000) | Number of episodes               | Age standardized incidence |
| Samoa           | 7,080<br>(6,540 to 7,670)                | 7,738.1<br>(7,133.9 to 8,390.1)          | -0.5<br>(-8.2 to 8.2)            | -21.9<br>(-27.9 to 15.8)   | 6,820<br>(6,230 to 7,410)                | 7,400.6<br>(6,806.2 to 8,005.1)          | 7.3<br>(-0.5 to 15.2)            | -17.5<br>(-22.7 to 11.8)   |
| Solomon Islands | 29,000<br>(26,500 to 31,600)             | 11,696.3<br>(10,790.9 to 12,613.5)       | 28.4<br>(19.5 to 37.3)           | -29.2<br>(-34.0 to 23.9)   | 25,700<br>(23,300 to 28,700)             | 9,559.8<br>(8,732.0 to 10,428.4)         | 31.1<br>(21.0 to 42.1)           | -31.1<br>(-35.8 to 25.9)   |
| Tokelau         | 46<br>(42 to 50)                         | 6,642.6<br>(6,104.9 to 7,211.1)          | -36.8<br>(-41.3 to 31.9)         | -26.4<br>(-31.5 to 21.4)   | 41<br>(37 to 44)                         | 6,039.7<br>(5,526.7 to 6,566.1)          | -46.9<br>(-50.5 to 42.9)         | -29.5<br>(-34.1 to 24.7)   |
| Tonga           | 3,240<br>(2,970 to 3,540)                | 7,240.3<br>(6,676.0 to 7,847.5)          | -20.4<br>(-25.5 to 14.6)         | -28.4<br>(-33.5 to 22.3)   | 3,030<br>(2,770 to 3,300)                | 6,073.3<br>(5,583.4 to 6,615.8)          | -19.2<br>(-24.6 to 13.5)         | -32.0<br>(-36.7 to 26.8)   |
| Tuvalu          | 371<br>(340 to 403)                      | 6,840.0<br>(6,289.1 to 7,420.1)          | -9.7<br>(-17.2 to 1.8)           | -30.1<br>(-35.2 to 24.3)   | 327<br>(302 to 354)                      | 6,122.4<br>(5,652.4 to 6,609.7)          | -24.6<br>(-30.5 to 18.0)         | -33.8<br>(-38.4 to 28.4)   |
| Vanuatu         | 9,980<br>(9,130 to 10,900)               | 7,865.7<br>(7,230.7 to 8,492.9)          | 61.0<br>(49.9 to 73.4)           | -15.6<br>(-21.3 to -9.2)   | 8,740<br>(7,980 to 9,560)                | 6,878.7<br>(6,342.2 to 7,438.9)          | 54.8<br>(44.1 to 67.1)           | -20.5<br>(-25.1 to 14.8)   |
| Southeast Asia  | 22,600,000<br>(21,000,000 to 24,100,000) | 7,654.4<br>(7,156.7 to 8,186.5)          | 16.4<br>(10.3 to 22.9)           | -20.3<br>(-22.9 to 17.4)   | 19,400,000<br>(18,100,000 to 20,800,000) | 6,107.9<br>(5,695.5 to 6,566.9)          | 13.7<br>(7.8 to 20.2)            | -24.1<br>(-26.3 to 21.7)   |
| Cambodia        | 663,000<br>(612,000 to 717,000)          | 10,311.7<br>(9,491.5 to 11,170.0)        | -1.0<br>(-9.8 to 8.6)            | -32.8<br>(-37.3 to 27.4)   | 637,000<br>(587,000 to 690,000)          | 8,541.5<br>(7,874.7 to 9,281.2)          | -10.0<br>(-17.8 to 1.2)          | -41.3<br>(-45.0 to 36.7)   |

|                                  | Male                                  |                                          |                                  |                            | Female                                |                                          |                                  |                            |
|----------------------------------|---------------------------------------|------------------------------------------|----------------------------------|----------------------------|---------------------------------------|------------------------------------------|----------------------------------|----------------------------|
|                                  | 2019                                  |                                          | Percent change from 1990 to 2019 |                            | 2019                                  |                                          | Percent change from 1990 to 2019 |                            |
|                                  | Number of episodes                    | Age standardized incidence (per 100,000) | Number of episodes               | Age standardized incidence | Number of episodes                    | Age standardized incidence (per 100,000) | Number of episodes               | Age standardized incidence |
| Indonesia                        | 8,350,000<br>(7,700,000 to 9,050,000) | 7,559.4<br>(7,013.4 to 8,195.0)          | 11.2<br>(4.8 to 18.2)            | -19.3<br>(-22.9 to 15.1)   | 7,030,000<br>(6,500,000 to 7,610,000) | 6,146.1<br>(5,690.2 to 6,649.9)          | 12.7<br>(5.8 to 20.2)            | -16.9<br>(-20.6 to 13.1)   |
| Lao People's Democratic Republic | 223,000<br>(204,000 to 244,000)       | 7,808.8<br>(7,178.6 to 8,494.6)          | -10.0<br>(-17.8 to 2.3)          | -38.8<br>(-43.0 to 34.3)   | 202,000<br>(185,000 to 219,000)       | 6,804.2<br>(6,234.5 to 7,408.4)          | -15.6<br>(-22.4 to 8.3)          | -42.9<br>(-46.9 to 38.6)   |
| Malaysia                         | 1,370,000<br>(1,260,000 to 1,490,000) | 9,571.3<br>(8,843.8 to 10,475.5)         | 96.3<br>(80.1 to 113.8)          | -0.3<br>(-7.5 to 7.9)      | 1,060,000<br>(972,000 to 1,150,000)   | 7,770.2<br>(7,110.4 to 8,399.8)          | 75.7<br>(62.0 to 91.2)           | -7.2<br>(-14.0 to 0.6)     |
| Maldives                         | 13,000<br>(11,700 to 14,400)          | 5,337.0<br>(4,862.8 to 5,892.4)          | 76.9<br>(60.6 to 95.3)           | -26.4<br>(-31.0 to 21.2)   | 7,770<br>(6,990 to 8,650)             | 4,453.4<br>(4,042.2 to 4,912.7)          | 13.8<br>(3.2 to 24.5)            | -39.8<br>(-44.5 to 35.1)   |
| Mauritius                        | 37,600<br>(34,600 to 41,300)          | 5,875.9<br>(5,392.9 to 6,459.5)          | -7.9<br>(-16.5 to 0.1)           | -36.0<br>(-41.4 to 30.7)   | 31,100<br>(28,700 to 34,000)          | 4,511.7<br>(4,129.9 to 4,962.2)          | -10.7<br>(-17.6 to 3.1)          | -37.5<br>(-42.3 to 32.7)   |
| Myanmar                          | 1,490,000<br>(1,370,000 to 1,620,000) | 6,556.9<br>(6,060.8 to 7,093.9)          | -22.0<br>(-28.6 to 15.0)         | -38.5<br>(-43.2 to 33.5)   | 1,360,000<br>(1,250,000 to 1,480,000) | 5,182.3<br>(4,752.4 to 5,633.7)          | -23.0<br>(-30.0 to 16.0)         | -44.9<br>(-49.0 to 40.4)   |
| Philippines                      | 4,490,000<br>(4,190,000 to 4,810,000) | 10,114.1<br>(9,470.3 to 10,822.5)        | 25.8<br>(19.7 to 33.1)           | -19.3<br>(-22.0 to 16.2)   | 3,990,000<br>(3,740,000 to 4,260,000) | 8,382.7<br>(7,881.9 to 8,947.3)          | 25.3<br>(19.7 to 32.2)           | -25.3<br>(-27.3 to 23.1)   |
| Seychelles                       | 4,880<br>(4,470 to 5,370)             | 9,585.8<br>(8,782.5 to 10,517.0)         | 45.1<br>(32.9 to 57.6)           | -13.5<br>(-19.8 to -6.2)   | 3,810<br>(3,500 to 4,150)             | 7,483.7<br>(6,869.6 to 8,137.2)          | 24.0<br>(15.2 to 34.0)           | -14.0<br>(-19.4 to 7.8)    |

|                            | Male                                                   |                                                 |                                      |                                        | Female                                                 |                                               |                                      |                                        |
|----------------------------|--------------------------------------------------------|-------------------------------------------------|--------------------------------------|----------------------------------------|--------------------------------------------------------|-----------------------------------------------|--------------------------------------|----------------------------------------|
|                            | 2019                                                   |                                                 | Percent change from 1990 to 2019     |                                        | 2019                                                   |                                               | Percent change from 1990 to 2019     |                                        |
|                            | Number of episodes                                     | Age standardized incidence (per 100,000)        | Number of episodes                   | Age standardized incidence             | Number of episodes                                     | Age standardized incidence (per 100,000)      | Number of episodes                   | Age standardized incidence             |
| Sri Lanka                  | 618,000<br>(567,000 to 672,000)                        | 5,902.9<br>(5,420.3 to 6,419.1)                 | 2.3<br>(-5.8 to 10.7)                | -29.0<br>(-34.0 to 23.8)               | 555,000<br>(508,000 to 606,000)                        | 4,701.0<br>(4,283.9 to 5,130.5)               | 3.2<br>(-5.2 to 12.7)                | -37.0<br>(-42.0 to 31.9)               |
| Thailand                   | 2,530,000<br>(2,290,000 to 2,750,000)                  | 6,497.2<br>(5,935.5 to 7,026.4)                 | 55.8<br>(39.3 to 70.7)               | -6.5<br>(-13.8 to 0.6)                 | 2,250,000<br>(2,060,000 to 2,460,000)                  | 5,277.4<br>(4,839.9 to 5,752.5)               | 52.8<br>(39.0 to 67.9)               | -12.8<br>(-19.1 to 6.0)                |
| Timor-Leste                | 43,400<br>(39,600 to 47,500)                           | 7,786.7<br>(7,129.2 to 8,500.4)                 | 7.1<br>(-2.7 to 17.8)                | -26.8<br>(-32.2 to 21.0)               | 37,700<br>(34,300 to 41,300)                           | 6,744.2<br>(6,210.9 to 7,332.3)               | -9.3<br>(-17.4 to 0.4)               | -40.4<br>(-44.7 to 35.5)               |
| Viet Nam                   | 2,720,000<br>(2,480,000 to 2,940,000)                  | 6,532.6<br>(5,991.7 to 7,067.9)                 | 10.7<br>(0.6 to 20.6)                | -23.0<br>(-28.1 to 17.4)               | 2,190,000<br>(2,000,000 to 2,390,000)                  | 4,647.2<br>(4,233.5 to 5,079.4)               | 0.1<br>(-7.7 to 9.7)                 | -31.0<br>(-35.7 to 26.1)               |
| <b>Sub-Saharan Africa</b>  | <b>37,300,000</b><br><b>(34,500,000 to 40,400,000)</b> | <b>10,066.6</b><br><b>(9,424.5 to 10,750.7)</b> | <b>44.2</b><br><b>(40.0 to 48.7)</b> | <b>-22.4</b><br><b>(-23.8 to 20.8)</b> | <b>34,700,000</b><br><b>(32,200,000 to 37,800,000)</b> | <b>8,232.3</b><br><b>(7,721.8 to 8,794.4)</b> | <b>38.7</b><br><b>(34.5 to 43.0)</b> | <b>-26.9</b><br><b>(-28.3 to 25.5)</b> |
| Central Sub-Saharan Africa | 4,500,000<br>(4,090,000 to 4,930,000)                  | 10,443.0<br>(9,607.8 to 11,271.3)               | 34.3<br>(26.2 to 42.8)               | -32.7<br>(-36.3 to 28.5)               | 4,370,000<br>(4,000,000 to 4,750,000)                  | 8,702.4<br>(8,063.1 to 9,408.8)               | 37.4<br>(29.2 to 45.1)               | -33.0<br>(-35.9 to 29.4)               |
| Angola                     | 813,000<br>(747,000 to 897,000)                        | 8,470.6<br>(7,821.2 to 9,140.0)                 | 35.6<br>(24.2 to 46.5)               | -41.0<br>(-45.5 to 36.0)               | 775,000<br>(709,000 to 847,000)                        | 6,589.1<br>(6,112.7 to 7,086.1)               | 36.5<br>(26.7 to 48.1)               | -46.2<br>(-49.9 to 41.6)               |
| Central African Republic   | 219,000<br>(198,000 to 244,000)                        | 12,067.5<br>(11,064.3 to 13,265.1)              | 44.6<br>(34.8 to 55.6)               | -16.5<br>(-22.3 to 10.2)               | 217,000<br>(198,000 to 239,000)                        | 10,145.4<br>(9,298.2 to 11,084.1)             | 50.4<br>(39.4 to 61.7)               | -14.8<br>(-20.7 to 8.7)                |

|                                  | Male                                     |                                          |                                  |                            | Female                                   |                                          |                                  |                            |
|----------------------------------|------------------------------------------|------------------------------------------|----------------------------------|----------------------------|------------------------------------------|------------------------------------------|----------------------------------|----------------------------|
|                                  | 2019                                     |                                          | Percent change from 1990 to 2019 |                            | 2019                                     |                                          | Percent change from 1990 to 2019 |                            |
|                                  | Number of episodes                       | Age standardized incidence (per 100,000) | Number of episodes               | Age standardized incidence | Number of episodes                       | Age standardized incidence (per 100,000) | Number of episodes               | Age standardized incidence |
| Congo                            | 152,000<br>(139,000 to 166,000)          | 8,406.8<br>(7,720.9 to 9,151.2)          | 34.7<br>(24.4 to 44.9)           | -33.0<br>(-38.0 to -27.9)  | 155,000<br>(142,000 to 168,000)          | 7,648.3<br>(7,051.5 to 8,358.3)          | 35.5<br>(26.3 to 45.8)           | -27.6<br>(-32.5 to -22.1)  |
| Democratic Republic of the Congo | 3,220,000<br>(2,920,000 to 3,550,000)    | 11,185.1<br>(10,182.0 to 12,172.5)       | 33.9<br>(24.2 to 44.6)           | -30.6<br>(-35.2 to -25.1)  | 3,140,000<br>(2,850,000 to 3,440,000)    | 9,435.2<br>(8,678.0 to 10,314.2)         | 37.8<br>(27.8 to 48.3)           | -30.3<br>(-34.4 to -25.5)  |
| Equatorial Guinea                | 34,700<br>(31,600 to 38,100)             | 7,815.2<br>(7,211.7 to 8,500.5)          | 19.9<br>(8.3 to 33.3)            | -53.0<br>(-56.7 to -48.4)  | 28,400<br>(25,900 to 31,100)             | 6,162.7<br>(5,671.2 to 6,688.3)          | 6.4<br>(-2.9 to 16.3)            | -52.3<br>(-55.9 to -48.2)  |
| Gabon                            | 58,200<br>(53,400 to 63,200)             | 9,299.3<br>(8,511.9 to 10,071.8)         | 16.3<br>(6.8 to 26.5)            | -29.1<br>(-34.5 to -22.8)  | 49,000<br>(45,200 to 53,300)             | 6,749.9<br>(6,211.1 to 7,380.4)          | 5.9<br>(-2.1 to 14.0)            | -33.6<br>(-38.6 to -28.9)  |
| Eastern Sub-Saharan Africa       | 13,600,000<br>(12,600,000 to 14,800,000) | 9,374.8<br>(8,770.8 to 10,007.7)         | 31.5<br>(27.1 to 36.0)           | -28.5<br>(-30.2 to -26.7)  | 12,400,000<br>(11,400,000 to 13,500,000) | 7,633.0<br>(7,155.7 to 8,154.9)          | 25.9<br>(21.8 to 30.1)           | -32.8<br>(-34.4 to -31.1)  |
| Burundi                          | 400,000<br>(362,000 to 444,000)          | 9,411.6<br>(8,587.9 to 10,243.0)         | 35.2<br>(25.3 to 46.1)           | -30.1<br>(-35.5 to -24.4)  | 384,000<br>(345,000 to 425,000)          | 8,131.2<br>(7,462.6 to 8,854.9)          | 31.3<br>(22.5 to 41.2)           | -27.9<br>(-32.8 to -22.9)  |
| Comoros                          | 24,700<br>(22,700 to 26,800)             | 8,509.8<br>(7,864.4 to 9,195.5)          | -9.5<br>(-16.1 to 1.4)           | -37.5<br>(-41.9 to -32.7)  | 26,400<br>(24,200 to 28,700)             | 8,194.0<br>(7,571.5 to 8,898.7)          | -6.4<br>(-13.5 to 1.9)           | -36.0<br>(-40.1 to -31.0)  |
| Djibouti                         | 41,200<br>(37,600 to 45,100)             | 8,449.8<br>(7,803.4 to 9,166.5)          | 66.3<br>(53.6 to 81.6)           | -27.0<br>(-31.8 to -21.7)  | 30,400<br>(27,600 to 33,200)             | 6,860.8<br>(6,311.6 to 7,429.5)          | 57.5<br>(44.5 to 70.3)           | -29.3<br>(-34.1 to -24.5)  |

|            | Male                                  |                                          |                                  |                            | Female                                |                                          |                                  |                            |
|------------|---------------------------------------|------------------------------------------|----------------------------------|----------------------------|---------------------------------------|------------------------------------------|----------------------------------|----------------------------|
|            | 2019                                  |                                          | Percent change from 1990 to 2019 |                            | 2019                                  |                                          | Percent change from 1990 to 2019 |                            |
|            | Number of episodes                    | Age standardized incidence (per 100,000) | Number of episodes               | Age standardized incidence | Number of episodes                    | Age standardized incidence (per 100,000) | Number of episodes               | Age standardized incidence |
| Eritrea    | 284,000<br>(257,000 to 313,000)       | 12,209.3<br>(11,217.7 to 13,392.6)       | 46.8<br>(36.3 to 57.7)           | -24.1<br>(-29.0 to -19.4)  | 249,000<br>(225,000 to 275,000)       | 9,311.6<br>(8,510.9 to 10,200.3)         | 43.4<br>(32.6 to 54.9)           | -28.2<br>(-32.6 to -23.6)  |
| Ethiopia   | 3,620,000<br>(3,320,000 to 3,960,000) | 9,192.1<br>(8,555.2 to 9,898.1)          | 15.6<br>(10.6 to 21.2)           | -37.4<br>(-40.0 to -34.3)  | 3,010,000<br>(2,760,000 to 3,310,000) | 7,411.2<br>(6,918.4 to 7,968.3)          | 4.5<br>(-0.2 to 9.8)             | -40.7<br>(-43.1 to -38.0)  |
| Kenya      | 1,630,000<br>(1,510,000 to 1,750,000) | 9,571.6<br>(8,970.0 to 10,229.1)         | 70.5<br>(62.4 to 78.5)           | -11.2<br>(-13.2 to -9.3)   | 1,420,000<br>(1,310,000 to 1,540,000) | 7,466.5<br>(6,971.4 to 7,993.3)          | 46.8<br>(40.5 to 52.7)           | -24.7<br>(-26.1 to -23.3)  |
| Madagascar | 964,000<br>(879,000 to 1,050,000)     | 10,069.2<br>(9,222.6 to 10,929.3)        | 21.8<br>(11.8 to 33.4)           | -31.5<br>(-36.9 to -25.5)  | 924,000<br>(840,000 to 1,010,000)     | 8,740.9<br>(8,097.0 to 9,486.2)          | 31.4<br>(20.4 to 44.1)           | -29.5<br>(-35.6 to -22.6)  |
| Malawi     | 569,000<br>(517,000 to 624,000)       | 9,289.9<br>(8,577.3 to 10,103.9)         | 18.5<br>(9.6 to 27.6)            | -24.1<br>(-29.4 to -18.2)  | 509,000<br>(461,000 to 563,000)       | 6,897.8<br>(6,323.0 to 7,506.6)          | 4.1<br>(-4.3 to 13.2)            | -37.1<br>(-41.9 to -32.1)  |
| Mozambique | 817,000<br>(741,000 to 901,000)       | 8,621.5<br>(7,899.9 to 9,409.9)          | 34.6<br>(23.5 to 46.4)           | -22.0<br>(-28.1 to -15.5)  | 771,000<br>(701,000 to 849,000)       | 6,576.6<br>(6,040.9 to 7,102.4)          | 28.1<br>(18.6 to 38.4)           | -31.7<br>(-36.7 to -26.5)  |
| Rwanda     | 420,000<br>(383,000 to 462,000)       | 9,622.2<br>(8,813.9 to 10,391.8)         | -10.7<br>(-17.3 to 2.9)          | -37.9<br>(-42.2 to -32.9)  | 419,000<br>(383,000 to 461,000)       | 7,955.0<br>(7,329.7 to 8,616.0)          | -10.3<br>(-17.2 to 3.3)          | -40.3<br>(-44.5 to -36.3)  |
| Somalia    | 788,000<br>(713,000 to 883,000)       | 10,835.5<br>(9,942.1 to 11,831.2)        | 99.0<br>(83.9 to 112.7)          | -17.9<br>(-24.2 to 11.8)   | 743,000<br>(668,000 to 828,000)       | 9,171.3<br>(8,477.5 to 10,012.4)         | 111.3<br>(97.0 to 127.0)         | -20.5<br>(-26.0 to 14.9)   |

|                             | Male                                  |                                          |                                  |                            | Female                                |                                          |                                  |                            |
|-----------------------------|---------------------------------------|------------------------------------------|----------------------------------|----------------------------|---------------------------------------|------------------------------------------|----------------------------------|----------------------------|
|                             | 2019                                  |                                          | Percent change from 1990 to 2019 |                            | 2019                                  |                                          | Percent change from 1990 to 2019 |                            |
|                             | Number of episodes                    | Age standardized incidence (per 100,000) | Number of episodes               | Age standardized incidence | Number of episodes                    | Age standardized incidence (per 100,000) | Number of episodes               | Age standardized incidence |
| South Sudan                 | 340,000<br>(307,000 to 377,000)       | 9,495.1<br>(8,730.1 to 10,333.2)         | 12.3<br>(5.1 to 19.9)            | -20.2<br>(-25.4 to -13.9)  | 303,000<br>(274,000 to 335,000)       | 8,068.3<br>(7,438.6 to 8,743.6)          | 13.6<br>(5.4 to 22.1)            | -25.0<br>(-30.0 to -19.5)  |
| Uganda                      | 1,270,000<br>(1,150,000 to 1,410,000) | 9,183.5<br>(8,447.7 to 10,093.8)         | 55.8<br>(44.4 to 68.1)           | -17.4<br>(-23.0 to -10.8)  | 1,210,000<br>(1,100,000 to 1,340,000) | 7,375.7<br>(6,787.9 to 8,009.6)          | 59.3<br>(48.1 to 70.6)           | -22.2<br>(-27.5 to -16.3)  |
| United Republic of Tanzania | 1,980,000<br>(1,800,000 to 2,180,000) | 9,316.1<br>(8,607.8 to 10,097.6)         | 32.7<br>(22.7 to 42.4)           | -32.1<br>(-37.3 to -26.7)  | 1,930,000<br>(1,750,000 to 2,140,000) | 8,036.8<br>(7,343.0 to 8,785.3)          | 33.1<br>(24.3 to 43.8)           | -32.8<br>(-37.2 to -27.3)  |
| Zambia                      | 477,000<br>(435,000 to 527,000)       | 7,730.2<br>(7,131.4 to 8,341.1)          | 26.1<br>(16.1 to 37.2)           | -31.4<br>(-36.3 to -26.0)  | 427,000<br>(387,000 to 469,000)       | 6,178.3<br>(5,695.4 to 6,718.0)          | 15.8<br>(7.4 to 25.2)            | -38.5<br>(-43.0 to -33.8)  |
| Southern Sub-Saharan Africa | 3,450,000<br>(3,220,000 to 3,700,000) | 11,464.0<br>(10,765.1 to 12,247.7)       | 37.2<br>(32.0 to 42.2)           | -9.0<br>(-12.1 to -6.1)    | 3,060,000<br>(2,860,000 to 3,270,000) | 8,506.7<br>(7,934.0 to 9,099.0)          | 21.9<br>(17.1 to 26.7)           | -16.3<br>(-18.7 to -13.7)  |
| Botswana                    | 80,600<br>(73,600 to 87,800)          | 9,286.5<br>(8,543.7 to 10,100.5)         | 44.5<br>(35.1 to 56.4)           | -22.9<br>(-28.0 to -17.2)  | 75,000<br>(68,400 to 82,600)          | 7,420.7<br>(6,785.1 to 8,145.7)          | 57.6<br>(47.8 to 69.5)           | -9.1<br>(-14.5 to -2.9)    |
| Eswatini                    | 45,700<br>(41,800 to 50,000)          | 10,897.0<br>(10,041.7 to 11,825.7)       | 19.5<br>(10.3 to 29.4)           | -16.9<br>(-22.9 to -10.8)  | 38,000<br>(34,900 to 41,400)          | 7,641.8<br>(7,063.4 to 8,318.3)          | 0.2<br>(-6.9 to 8.0)             | -25.6<br>(-30.6 to -20.3)  |
| Lesotho                     | 97,300<br>(88,900 to 107,000)         | 11,996.3<br>(11,021.1 to 13,010.9)       | 6.9<br>(-0.4 to 16.4)            | -11.0<br>(-17.6 to -4.1)   | 83,900<br>(76,300 to 91,400)          | 8,899.8<br>(8,109.6 to 9,656.4)          | -1.9<br>(-9.2 to 5.6)            | -12.3<br>(-18.0 to -5.4)   |

|                            | Male                                     |                                          |                                  |                            | Female                                   |                                          |                                  |                            |
|----------------------------|------------------------------------------|------------------------------------------|----------------------------------|----------------------------|------------------------------------------|------------------------------------------|----------------------------------|----------------------------|
|                            | 2019                                     |                                          | Percent change from 1990 to 2019 |                            | 2019                                     |                                          | Percent change from 1990 to 2019 |                            |
|                            | Number of episodes                       | Age standardized incidence (per 100,000) | Number of episodes               | Age standardized incidence | Number of episodes                       | Age standardized incidence (per 100,000) | Number of episodes               | Age standardized incidence |
| Namibia                    | 107,000<br>(98,400 to 117,000)           | 12,180.6<br>(11,232.0 to 13,337.8)       | 22.6<br>(14.6 to 30.6)           | -24.2<br>(-29.4 to -19.3)  | 89,000<br>(81,600 to 97,800)             | 8,285.5<br>(7,640.0 to 9,029.5)          | 9.2<br>(2.0 to 17.4)             | -34.3<br>(-38.9 to -29.3)  |
| South Africa               | 2,550,000<br>(2,390,000 to 2,730,000)    | 11,585.8<br>(10,819.3 to 12,428.3)       | 41.9<br>(35.3 to 48.1)           | -8.3<br>(-12.0 to -4.6)    | 2,280,000<br>(2,130,000 to 2,440,000)    | 8,659.1<br>(8,072.1 to 9,262.2)          | 19.1<br>(13.5 to 24.7)           | -19.3<br>(-22.3 to -16.3)  |
| Zimbabwe                   | 564,000<br>(518,000 to 615,000)          | 10,845.1<br>(10,035.7 to 11,728.7)       | 28.1<br>(19.0 to 37.0)           | -9.6<br>(-16.1 to -2.5)    | 494,000<br>(448,000 to 539,000)          | 7,907.2<br>(7,265.6 to 8,550.7)          | 43.5<br>(33.7 to 54.6)           | -3.5<br>(-10.0 to 3.8)     |
| Western Sub-Saharan Africa | 15,800,000<br>(14,600,000 to 17,000,000) | 10,268.3<br>(9,599.8 to 10,984.0)        | 63.0<br>(58.2 to 68.0)           | -16.3<br>(-18.0 to -14.5)  | 15,000,000<br>(13,800,000 to 16,300,000) | 8,578.8<br>(8,032.5 to 9,187.5)          | 56.8<br>(52.0 to 62.5)           | -22.3<br>(-23.9 to -20.5)  |
| Benin                      | 417,000<br>(380,000 to 453,000)          | 10,264.0<br>(9,419.6 to 11,119.4)        | 75.1<br>(63.3 to 89.0)           | -19.2<br>(-24.7 to -12.8)  | 423,000<br>(386,000 to 461,000)          | 8,839.3<br>(8,111.7 to 9,625.1)          | 80.4<br>(65.9 to 94.2)           | -17.8<br>(-24.1 to -11.8)  |
| Burkina Faso               | 830,000<br>(755,000 to 910,000)          | 11,137.4<br>(10,218.0 to 12,188.6)       | 81.8<br>(70.4 to 94.9)           | -12.2<br>(-18.4 to -5.3)   | 800,000<br>(733,000 to 879,000)          | 9,040.1<br>(8,300.5 to 9,856.1)          | 73.1<br>(61.0 to 86.5)           | -16.3<br>(-22.5 to -10.6)  |
| Cabo Verde                 | 21,000<br>(19,200 to 22,800)             | 9,249.8<br>(8,467.9 to 10,085.5)         | 40.1<br>(29.4 to 52.2)           | -15.5<br>(-22.0 to -8.4)   | 19,200<br>(17,700 to 20,900)             | 7,277.2<br>(6,697.0 to 7,939.5)          | 15.7<br>(6.9 to 24.9)            | -21.6<br>(-27.4 to -15.5)  |
| Cameroon                   | 995,000<br>(910,000 to 1,080,000)        | 10,490.8<br>(9,577.6 to 11,363.5)        | 114.5<br>(99.9 to 129.8)         | -11.0<br>(-17.3 to -4.1)   | 895,000<br>(818,000 to 976,000)          | 8,354.9<br>(7,686.3 to 9,042.3)          | 102.3<br>(87.2 to 118.4)         | -15.6<br>(-21.7 to -9.3)   |



|               | Male                                  |                                          |                                  |                            | Female                            |                                          |                                  |                            |
|---------------|---------------------------------------|------------------------------------------|----------------------------------|----------------------------|-----------------------------------|------------------------------------------|----------------------------------|----------------------------|
|               | 2019                                  |                                          | Percent change from 1990 to 2019 |                            | 2019                              |                                          | Percent change from 1990 to 2019 |                            |
|               | Number of episodes                    | Age standardized incidence (per 100,000) | Number of episodes               | Age standardized incidence | Number of episodes                | Age standardized incidence (per 100,000) | Number of episodes               | Age standardized incidence |
| Chad          | 745,000<br>(674,000 to 826,000)       | 12,875.3<br>(11,770.1 to 14,138.8)       | 116.9<br>(103.0 to 132.9)        | -11.2<br>(-17.4 to -4.2)   | 716,000<br>(646,000 to 801,000)   | 11,457.3<br>(10,559.0 to 12,445.2)       | 107.3<br>(94.0 to 121.9)         | -9.0<br>(-15.1 to 2.8)     |
| Côte d'Ivoire | 1,010,000<br>(914,000 to 1,090,000)   | 11,041.2<br>(10,060.9 to 12,032.1)       | 69.9<br>(58.0 to 82.8)           | -16.4<br>(-22.6 to -9.4)   | 920,000<br>(839,000 to 1,010,000) | 9,905.0<br>(9,105.7 to 10,787.7)         | 78.7<br>(66.4 to 92.9)           | -8.6<br>(-14.8 to 1.9)     |
| Gambia        | 84,700<br>(77,400 to 91,900)          | 11,477.7<br>(10,474.2 to 12,390.0)       | 47.9<br>(35.1 to 60.7)           | -25.2<br>(-31.6 to 18.7)   | 79,300<br>(72,600 to 87,200)      | 9,468.9<br>(8,688.8 to 10,278.2)         | 53.4<br>(40.8 to 67.6)           | -23.5<br>(-29.7 to 17.7)   |
| Ghana         | 1,300,000<br>(1,180,000 to 1,400,000) | 12,449.0<br>(11,354.3 to 13,588.4)       | 79.2<br>(66.2 to 94.7)           | -8.6<br>(-15.2 to -1.2)    | 961,000<br>(882,000 to 1,040,000) | 7,630.8<br>(7,018.5 to 8,251.4)          | 52.4<br>(40.4 to 66.6)           | -25.7<br>(-31.1 to 19.5)   |
| Guinea        | 586,000<br>(537,000 to 635,000)       | 13,499.7<br>(12,410.1 to 14,667.0)       | 54.8<br>(44.3 to 66.6)           | -6.0<br>(-12.9 to 0.8)     | 558,000<br>(508,000 to 611,000)   | 11,323.9<br>(10,398.5 to 12,328.4)       | 46.1<br>(35.1 to 57.2)           | -13.9<br>(-19.7 to 7.8)    |
| Guinea-Bissau | 66,900<br>(61,000 to 72,900)          | 11,596.8<br>(10,666.5 to 12,564.6)       | 26.0<br>(16.4 to 36.6)           | -20.2<br>(-25.9 to 13.8)   | 71,900<br>(65,000 to 78,800)      | 10,049.1<br>(9,195.1 to 10,888.5)        | 34.2<br>(23.9 to 44.9)           | -19.1<br>(-24.6 to 13.1)   |
| Liberia       | 176,000<br>(161,000 to 193,000)       | 10,795.8<br>(9,869.6 to 11,822.0)        | 47.1<br>(35.4 to 59.9)           | -22.8<br>(-28.8 to 16.3)   | 162,000<br>(147,000 to 177,000)   | 9,413.7<br>(8,645.8 to 10,240.4)         | 42.9<br>(31.3 to 55.1)           | -24.7<br>(-30.4 to 19.1)   |
| Mali          | 610,000<br>(557,000 to 667,000)       | 7,760.0<br>(7,151.8 to 8,399.4)          | 81.1<br>(69.6 to 95.1)           | -18.7<br>(-24.8 to 12.4)   | 594,000<br>(536,000 to 658,000)   | 6,762.2<br>(6,247.3 to 7,318.5)          | 76.9<br>(65.4 to 89.6)           | -19.5<br>(-24.8 to 13.7)   |

|                       | Male                                  |                                          |                                  |                            | Female                                |                                          |                                  |                            |
|-----------------------|---------------------------------------|------------------------------------------|----------------------------------|----------------------------|---------------------------------------|------------------------------------------|----------------------------------|----------------------------|
|                       | 2019                                  |                                          | Percent change from 1990 to 2019 |                            | 2019                                  |                                          | Percent change from 1990 to 2019 |                            |
|                       | Number of episodes                    | Age standardized incidence (per 100,000) | Number of episodes               | Age standardized incidence | Number of episodes                    | Age standardized incidence (per 100,000) | Number of episodes               | Age standardized incidence |
| Mauritania            | 150,000<br>(137,000 to 164,000)       | 10,270.7<br>(9,383.3 to 11,197.4)        | 51.7<br>(40.8 to 62.5)           | -19.3<br>(-25.2 to -12.9)  | 136,000<br>(124,000 to 148,000)       | 8,696.9<br>(7,977.0 to 9,451.6)          | 42.1<br>(31.1 to 53.5)           | -17.0<br>(-23.6 to -10.5)  |
| Niger                 | 933,000<br>(844,000 to 1,040,000)     | 12,313.7<br>(11,253.2 to 13,445.3)       | 85.0<br>(71.8 to 98.1)           | -20.3<br>(-26.4 to -13.5)  | 948,000<br>(854,000 to 1,050,000)     | 10,899.8<br>(10,062.9 to 11,848.2)       | 91.3<br>(77.6 to 106.5)          | -21.7<br>(-26.9 to -15.6)  |
| Nigeria               | 6,630,000<br>(6,110,000 to 7,190,000) | 9,167.8<br>(8,570.3 to 9,797.3)          | 48.1<br>(43.6 to 52.8)           | -20.1<br>(-22.3 to -17.9)  | 6,530,000<br>(6,010,000 to 7,120,000) | 7,982.4<br>(7,463.2 to 8,565.0)          | 41.9<br>(36.7 to 47.6)           | -27.8<br>(-29.8 to -25.7)  |
| Sao Tome and Principe | 9,110<br>(8,330 to 9,960)             | 12,125.2<br>(11,037.7 to 13,220.2)       | 22.3<br>(11.5 to 34.4)           | -19.6<br>(-25.8 to -12.4)  | 8,350<br>(7,640 to 9,130)             | 10,423.6<br>(9,591.3 to 11,289.9)        | 7.8<br>(-1.4 to 18.5)            | -24.5<br>(-30.1 to -17.9)  |
| Senegal               | 567,000<br>(521,000 to 617,000)       | 10,175.3<br>(9,360.5 to 11,026.3)        | 45.7<br>(34.6 to 58.5)           | -19.1<br>(-25.3 to -12.6)  | 509,000<br>(468,000 to 551,000)       | 8,528.9<br>(7,890.1 to 9,192.1)          | 42.7<br>(30.2 to 55.0)           | -17.7<br>(-24.0 to -12.1)  |
| Sierra Leone          | 359,000<br>(327,000 to 392,000)       | 12,484.8<br>(11,477.1 to 13,645.2)       | 55.1<br>(44.5 to 67.5)           | -17.9<br>(-23.8 to -10.8)  | 348,000<br>(317,000 to 382,000)       | 10,998.4<br>(10,109.7 to 12,026.1)       | 69.1<br>(56.7 to 81.9)           | -10.7<br>(-16.6 to -4.1)   |
| Togo                  | 283,000<br>(258,000 to 309,000)       | 11,350.3<br>(10,375.3 to 12,364.9)       | 51.4<br>(38.8 to 63.8)           | -20.4<br>(-26.9 to -14.0)  | 275,000<br>(251,000 to 300,000)       | 9,066.9<br>(8,335.8 to 9,934.2)          | 43.5<br>(31.6 to 55.6)           | -26.6<br>(-31.8 to -21.0)  |

**Appendix Table 2. Lower respiratory infection episodes (in thousands) and incidence rates (per 100,000 people) in 2019 and the percent change in episodes and incidence rates between 1990 and 2019 by age, sex, and GBD super-regions (95% UI)**

|                                                  |             | Male                         |                                    |                                  |                           | Female                       |                                    |                                  |                           |
|--------------------------------------------------|-------------|------------------------------|------------------------------------|----------------------------------|---------------------------|------------------------------|------------------------------------|----------------------------------|---------------------------|
|                                                  |             | 2019                         |                                    | Percent change from 1990 to 2019 |                           | 2019                         |                                    | Percent change from 1990 to 2019 |                           |
|                                                  |             | Age Group                    | Number of episodes (in thousands)  | Incidence rate (per 100,000)     | Number of episodes        | Incidence rate               | Number of episodes (in thousands)  | Incidence rate (per 100,000)     | Number of episodes        |
| Global                                           | 0-4 years   | 23,500<br>(18,600 to 29,500) | 6,876.8<br>(5,444.3 to 8,625.5)    | -49.1<br>(-51.1 to -47.4)        | -51.7<br>(-53.5 to -50.0) | 21,500<br>(17,100 to 26,800) | 6,721.1<br>(5,337.5 to 8,363.0)    | -49.9<br>(-51.6 to -48.5)        | -52.1<br>(-53.7 to -50.7) |
|                                                  | 5-14 years  | 33,000<br>(26,900 to 40,300) | 4,931.0<br>(4,018.3 to 6,023.6)    | -20.8<br>(-25.6 to -16.2)        | -31.9<br>(-36.0 to -27.9) | 26,600<br>(21,600 to 32,500) | 4,235.4<br>(3,439.3 to 5,172.5)    | -27.5<br>(-31.4 to -23.9)        | -36.9<br>(-40.2 to -33.7) |
|                                                  | 15-49 years | 82,100<br>(74,200 to 91,200) | 4,128.1<br>(3,726.8 to 4,583.5)    | 29.5<br>(26.8 to 31.9)           | -10.6<br>(-12.4 to -8.9)  | 76,700<br>(68,900 to 86,000) | 3,944.6<br>(3,541.5 to 4,421.4)    | 26.1<br>(23.2 to 29.1)           | -13.3<br>(-15.3 to -11.2) |
|                                                  | 50-69 years | 65,800<br>(60,000 to 72,400) | 9,737.2<br>(8,868.2 to 10,708.0)   | 66.8<br>(64.0 to 69.6)           | -17.0<br>(-18.4 to -15.6) | 55,500<br>(50,300 to 61,300) | 7,894.7<br>(7,151.2 to 8,715.1)    | 67.6<br>(64.8 to 70.4)           | -17.6<br>(-18.9 to -16.2) |
|                                                  | 70+ years   | 52,500<br>(47,200 to 58,900) | 25,786.6<br>(23,182.5 to 28,975.4) | 126.0<br>(121.4 to 131.1)        | -8.6<br>(-10.5 to -6.6)   | 51,600<br>(46,600 to 57,400) | 19,819.9<br>(17,921.3 to 22,072.6) | 93.7<br>(89.8 to 98.0)           | -11.2<br>(-13.0 to -9.2)  |
| Central Europe, Eastern Europe, and Central Asia | 0-4 years   | 825<br>(654 to 1,030)        | 5,809.8<br>(4,602.4 to 7,284.2)    | -57.6<br>(-60.6 to -54.6)        | -45.7<br>(-49.7 to -42.0) | 744<br>(587 to 934)          | 5,565.6<br>(4,395.4 to 6,990.1)    | -57.1<br>(-60.0 to -54.5)        | -43.9<br>(-47.6 to -40.5) |
|                                                  | 5-14 years  | 1,220<br>(998 to 1,480)      | 4,371.5<br>(3,589.0 to 5,302.6)    | -43.4<br>(-45.9 to -40.7)        | -27.8<br>(-31.1 to -24.4) | 1,090<br>(889 to 1,340)      | 4,171.7<br>(3,392.2 to 5,108.1)    | -45.7<br>(-48.1 to -43.4)        | -29.0<br>(-32.1 to -26.1) |
|                                                  | 15-49 years | 3,440<br>(3,160 to 3,720)    | 3,433.3<br>(3,155.2 to 3,713.0)    | 0.6<br>(-2.8 to 4.7)             | 2.9<br>(-0.6 to 7.1)      | 1,960<br>(1,780 to 2,150)    | 1,967.5<br>(1,787.7 to 2,157.2)    | -10.8<br>(-14.0 to -7.4)         | -8.3<br>(-11.5 to -4.8)   |

|                             |             |                           |                                    |                           |                           |                           |                                    |                           |                           |
|-----------------------------|-------------|---------------------------|------------------------------------|---------------------------|---------------------------|---------------------------|------------------------------------|---------------------------|---------------------------|
|                             | 50-69 years | 4,760<br>(4,360 to 5,190) | 10,646.2<br>(9,745.2 to 11,620.2)  | 0.8<br>(-3.8 to 4.7)      | -17.9<br>(-21.7 to -14.7) | 2,710<br>(2,470 to 2,980) | 4,971.0<br>(4,527.6 to 5,459.1)    | -3.8<br>(-6.9 to -0.5)    | -17.0<br>(-19.7 to -14.2) |
|                             | 70+ years   | 2,810<br>(2,510 to 3,130) | 22,099.9<br>(19,745.1 to 24,630.1) | 52.9<br>(46.7 to 59.0)    | -9.2<br>(-12.9 to -5.5)   | 3,320<br>(2,980 to 3,690) | 13,555.0<br>(12,158.2 to 15,056.5) | 17.7<br>(12.3 to 22.5)    | -15.2<br>(-19.1 to -11.7) |
| High-income                 | 0-4 years   | 1,570<br>(1,220 to 2,020) | 5,394.0<br>(4,175.9 to 6,938.8)    | -27.7<br>(-30.7 to -24.6) | -21.9<br>(-25.1 to -18.6) | 1,240<br>(959 to 1,600)   | 4,471.5<br>(3,453.0 to 5,773.3)    | -26.1<br>(-29.0 to -23.3) | -20.5<br>(-23.6 to -17.4) |
|                             | 5-14 years  | 1,480<br>(1,160 to 1,850) | 2,378.1<br>(1,865.9 to 2,964.7)    | -3.7<br>(-7.8 to 0.8)     | -0.5<br>(-4.7 to 4.1)     | 1,370<br>(1,080 to 1,710) | 2,298.8<br>(1,818.4 to 2,876.1)    | -6.1<br>(-9.2 to -2.3)    | -3.1<br>(-6.3 to 0.8)     |
|                             | 15-49 years | 4,240<br>(3,790 to 4,760) | 1,725.3<br>(1,544.2 to 1,938.9)    | -10.9<br>(-13.5 to -7.7)  | -14.1<br>(-16.6 to -11.0) | 4,450<br>(3,930 to 5,040) | 1,849.4<br>(1,632.7 to 2,093.6)    | 3.2<br>(0.5 to 6.4)       | 0.1<br>(-2.5 to 3.2)      |
|                             | 50-69 years | 5,400<br>(4,950 to 5,880) | 4,042.5<br>(3,706.4 to 4,409.2)    | 12.6<br>(8.3 to 16.6)     | -29.7<br>(-32.4 to -27.3) | 4,730<br>(4,300 to 5,200) | 3,388.2<br>(3,078.3 to 3,723.6)    | 19.2<br>(15.1 to 23.2)    | -21.4<br>(-24.1 to -18.8) |
|                             | 70+ years   | 8,440<br>(7,660 to 9,250) | 13,519.0<br>(12,278.1 to 14,820.7) | 52.4<br>(46.5 to 58.6)    | -30.2<br>(-33.0 to -27.4) | 8,330<br>(7,610 to 9,060) | 9,979.5<br>(9,115.8 to 10,859.0)   | 18.9<br>(14.7 to 23.7)    | -32.3<br>(-34.7 to -29.6) |
| Latin America and Caribbean | 0-4 years   | 1,840<br>(1,450 to 2,300) | 7,515.0<br>(5,927.5 to 9,386.0)    | -51.1<br>(-53.7 to -48.2) | -49.4<br>(-52.1 to -46.4) | 1,800<br>(1,430 to 2,220) | 7,630.2<br>(6,064.1 to 9,438.6)    | -54.0<br>(-56.5 to -51.4) | -51.9<br>(-54.4 to -49.1) |
|                             | 5-14 years  | 1,930<br>(1,570 to 2,360) | 3,907.0<br>(3,175.2 to 4,770.8)    | -34.6<br>(-38.7 to -30.3) | -36.8<br>(-40.8 to -32.6) | 1,750<br>(1,420 to 2,140) | 3,688.1<br>(2,986.5 to 4,511.9)    | -37.6<br>(-41.7 to -33.8) | -38.5<br>(-42.5 to -34.7) |
|                             | 15-49 years | 5,540<br>(5,030 to 6,020) | 3,653.9<br>(3,319.5 to 3,975.8)    | 23.9<br>(19.4 to 28.2)    | -21.1<br>(-24.0 to -18.4) | 4,210<br>(3,790 to 4,620) | 2,688.9<br>(2,423.6 to 2,956.8)    | 16.8<br>(11.8 to 21.5)    | -24.9<br>(-28.2 to -21.9) |
|                             | 50-69 years | 5,730<br>(5,180 to 6,310) | 12,278.7<br>(11,096.7 to 13,509.5) | 111.5<br>(103.8 to 118.4) | -16.3<br>(-19.3 to -13.6) | 5,770<br>(5,250 to 6,320) | 11,044.7<br>(10,057.8 to 12,099.3) | 101.4<br>(95.5 to 107.6)  | -24.4<br>(-26.6 to -22.1) |
|                             | 70+ years   | 5,690<br>(5,120 to 6,290) | 39,537.0<br>(35,616.5 to 43,707.7) | 163.9<br>(153.9 to 173.1) | -7.6<br>(-11.1 to -4.4)   | 7,000<br>(6,350 to 7,780) | 38,357.6<br>(34,786.1 to 42,667.0) | 149.0<br>(141.3 to 156.5) | -19.7<br>(-22.2 to -17.2) |

|                                        |             |                              |                                    |                           |                           |                              |                                    |                           |                           |
|----------------------------------------|-------------|------------------------------|------------------------------------|---------------------------|---------------------------|------------------------------|------------------------------------|---------------------------|---------------------------|
| North Africa and Middle East           | 0-4 years   | 2,560<br>(2,010 to 3,180)    | 8,336.2<br>(6,540.8 to 10,366.6)   | -48.7<br>(-51.7 to -46.0) | -54.4<br>(-57.0 to -51.9) | 2,440<br>(1,910 to 3,030)    | 8,408.3<br>(6,590.1 to 10,434.3)   | -54.3<br>(-57.0 to -51.9) | -59.1<br>(-61.4 to -56.8) |
|                                        | 5-14 years  | 3,040<br>(2,450 to 3,700)    | 5,083.2<br>(4,089.3 to 6,182.7)    | -20.8<br>(-26.4 to -14.7) | -38.7<br>(-43.0 to -34.0) | 2,970<br>(2,400 to 3,630)    | 5,272.5<br>(4,268.0 to 6,454.9)    | -24.4<br>(-29.8 to -19.1) | -40.8<br>(-45.1 to -36.7) |
|                                        | 15-49 years | 6,040<br>(5,390 to 6,750)    | 3,454.4<br>(3,084.5 to 3,857.6)    | 74.0<br>(66.3 to 81.0)    | -17.1<br>(-20.7 to -13.8) | 5,570<br>(4,960 to 6,250)    | 3,509.4<br>(3,122.5 to 3,933.6)    | 60.8<br>(53.5 to 68.2)    | -19.9<br>(-23.5 to -16.2) |
|                                        | 50-69 years | 3,530<br>(3,180 to 3,900)    | 8,584.6<br>(7,738.6 to 9,497.8)    | 110.0<br>(100.6 to 120.4) | -17.6<br>(-21.3 to -13.5) | 2,980<br>(2,660 to 3,300)    | 7,730.3<br>(6,899.1 to 8,534.4)    | 105.6<br>(96.9 to 115.6)  | -18.5<br>(-22.0 to -14.6) |
|                                        | 70+ years   | 2,680<br>(2,400 to 3,030)    | 27,496.0<br>(24,656.3 to 31,125.2) | 146.6<br>(132.8 to 161.1) | -7.2<br>(-12.4 to -1.7)   | 2,390<br>(2,120 to 2,700)    | 24,401.5<br>(21,644.2 to 27,597.0) | 125.6<br>(112.4 to 139.9) | -11.9<br>(-17.1 to -6.4)  |
| South Asia                             | 0-4 years   | 5,530<br>(4,340 to 6,880)    | 6,454.8<br>(5,066.7 to 8,032.7)    | -50.7<br>(-53.3 to -48.1) | -51.8<br>(-54.4 to -49.3) | 4,910<br>(3,880 to 6,090)    | 6,238.8<br>(4,934.7 to 7,737.2)    | -50.1<br>(-52.1 to -48.3) | -50.6<br>(-52.6 to -48.8) |
|                                        | 5-14 years  | 13,600<br>(10,900 to 16,700) | 7,402.1<br>(5,925.4 to 9,124.1)    | -12.0<br>(-19.6 to -4.5)  | -30.8<br>(-36.8 to -24.9) | 8,150<br>(6,580 to 9,980)    | 4,821.9<br>(3,893.1 to 5,903.7)    | -28.7<br>(-33.9 to -23.1) | -43.9<br>(-48.0 to -39.5) |
|                                        | 15-49 years | 31,600<br>(28,200 to 35,300) | 6,366.6<br>(5,681.3 to 7,111.8)    | 51.5<br>(45.7 to 57.0)    | -16.3<br>(-19.5 to -13.3) | 33,000<br>(29,400 to 37,000) | 6,911.6<br>(6,157.3 to 7,756.1)    | 46.4<br>(40.6 to 51.8)    | -21.8<br>(-24.9 to -19.0) |
|                                        | 50-69 years | 24,600<br>(22,200 to 27,400) | 20,043.3<br>(18,058.9 to 22,288.0) | 86.0<br>(79.8 to 93.0)    | -13.6<br>(-16.5 to -10.3) | 23,600<br>(21,000 to 26,200) | 19,278.2<br>(17,193.7 to 21,449.8) | 95.7<br>(88.8 to 102.7)   | -19.4<br>(-22.2 to -16.5) |
|                                        | 70+ years   | 15,900<br>(14,000 to 18,600) | 48,185.3<br>(42,327.6 to 56,191.8) | 185.4<br>(171.6 to 197.9) | -3.2<br>(-7.9 to 1.0)     | 14,000<br>(12,400 to 16,100) | 38,852.6<br>(34,264.3 to 44,606.1) | 223.1<br>(209.7 to 237.9) | -4.2<br>(-8.2 to 0.1)     |
| Southeast Asia, East Asia, and Oceania | 0-4 years   | 4,130<br>(3,240 to 5,200)    | 5,556.8<br>(4,360.8 to 7,004.4)    | -71.1<br>(-73.0 to -69.1) | -63.4<br>(-65.8 to -60.8) | 3,420<br>(2,660 to 4,300)    | 5,161.2<br>(4,022.2 to 6,498.3)    | -73.5<br>(-75.3 to -71.8) | -65.6<br>(-67.8 to -63.3) |
|                                        | 5-14 years  | 5,270<br>(4,190 to 6,600)    | 3,746.3<br>(2,976.3 to 4,689.0)    | -51.0<br>(-55.4 to -46.5) | -40.9<br>(-46.2 to -35.5) | 4,560<br>(3,610 to 5,710)    | 3,641.9<br>(2,887.1 to 4,560.9)    | -53.6<br>(-57.6 to -49.6) | -40.8<br>(-45.9 to -35.7) |

|                    |             |                              |                                    |                           |                           |                              |                                    |                          |                           |
|--------------------|-------------|------------------------------|------------------------------------|---------------------------|---------------------------|------------------------------|------------------------------------|--------------------------|---------------------------|
|                    | 15-49 years | 17,800<br>(15,800 to 20,100) | 3,124.4<br>(2,776.8 to 3,528.9)    | -7.3<br>(-11.0 to -3.5)   | -22.7<br>(-25.8 to -19.5) | 15,500<br>(13,600 to 17,800) | 2,831.9<br>(2,486.8 to 3,249.1)    | -9.3<br>(-14.0 to -4.4)  | -24.4<br>(-28.3 to -20.3) |
|                    | 50-69 years | 15,500<br>(14,000 to 17,200) | 6,286.4<br>(5,675.2 to 6,971.3)    | 77.3<br>(71.8 to 82.9)    | -24.0<br>(-26.4 to -21.6) | 10,700<br>(9,590 to 12,000)  | 4,269.8<br>(3,823.0 to 4,766.4)    | 45.1<br>(40.7 to 49.9)   | -40.9<br>(-42.7 to -38.9) |
|                    | 70+ years   | 12,900<br>(11,600 to 14,500) | 20,702.3<br>(18,538.5 to 23,202.7) | 165.2<br>(151.8 to 178.9) | -7.1<br>(-11.8 to -2.3)   | 12,500<br>(11,300 to 14,000) | 16,156.8<br>(14,589.5 to 18,051.8) | 89.8<br>(82.7 to 97.4)   | -29.6<br>(-32.2 to -26.8) |
| Sub-Saharan Africa | 0-4 years   | 7,090<br>(5,640 to 8,800)    | 8,452.1<br>(6,729.8 to 10,493.6)   | -10.3<br>(-13.1 to -7.6)  | -51.8<br>(-53.3 to -50.3) | 6,990<br>(5,580 to 8,700)    | 8,540.7<br>(6,822.2 to 10,636.8)   | -8.1<br>(-11.1 to -5.2)  | -50.0<br>(-51.6 to -48.4) |
|                    | 5-14 years  | 6,490<br>(5,290 to 7,860)    | 4,451.0<br>(3,626.5 to 5,391.4)    | 29.9<br>(23.7 to 35.9)    | -40.1<br>(-42.9 to -37.3) | 6,700<br>(5,420 to 8,160)    | 4,649.1<br>(3,765.5 to 5,668.5)    | 28.6<br>(23.1 to 34.9)   | -39.8<br>(-42.4 to -36.8) |
|                    | 15-49 years | 13,500<br>(12,200 to 15,100) | 5,353.5<br>(4,844.8 to 5,981.5)    | 85.2<br>(81.1 to 89.1)    | -21.7<br>(-23.4 to -20.1) | 12,100<br>(11,000 to 13,600) | 4,535.2<br>(4,122.7 to 5,105.7)    | 57.1<br>(53.5 to 61.0)   | -33.9<br>(-35.4 to -32.2) |
|                    | 50-69 years | 6,290<br>(5,650 to 6,980)    | 15,499.9<br>(13,928.8 to 17,200.7) | 75.7<br>(72.2 to 80.1)    | -15.6<br>(-17.3 to -13.5) | 4,990<br>(4,490 to 5,520)    | 11,211.6<br>(10,094.9 to 12,403.1) | 94.8<br>(90.7 to 99.5)   | -17.1<br>(-18.9 to -15.1) |
|                    | 70+ years   | 3,980<br>(3,540 to 4,530)    | 46,296.9<br>(41,168.9 to 52,655.8) | 86.4<br>(81.5 to 91.8)    | -6.6<br>(-9.1 to -3.9)    | 4,000<br>(3,580 to 4,530)    | 37,562.8<br>(33,598.4 to 42,583.6) | 100.1<br>(94.9 to 105.4) | -6.1<br>(-8.5 to -3.6)    |

Appendix Table 3. Lower respiratory infection deaths and age standardized mortality rates (per 100, 000 people) among males and females in 2019 and the percent change in deaths and age standardized mortality rates between 1990 and 2019 for 21 GBD regions and 204 countries and territories (95% UI)

|                                                         | Male                                         |                                               |                                  |                                  | Female                                       |                                               |                                  |                                  |
|---------------------------------------------------------|----------------------------------------------|-----------------------------------------------|----------------------------------|----------------------------------|----------------------------------------------|-----------------------------------------------|----------------------------------|----------------------------------|
|                                                         | 2019                                         |                                               | Percent change from 1990 to 2019 |                                  | 2019                                         |                                               | Percent change from 1990 to 2019 |                                  |
|                                                         | Number of deaths                             | Age standardized mortality rate (per 100,000) | Number of deaths                 | Age standardized mortality rate  | Number of deaths                             | Age standardized mortality rate (per 100,000) | Number of deaths                 | Age standardized mortality rate  |
| <b>Global</b>                                           | <b>1,300,000</b><br>(1,180,000 to 1,420,000) | <b>39.7</b><br>(36.0 to 43.6)                 | <b>-25.6</b><br>(-34.8 to -15.5) | <b>-47.2</b><br>(-52.1 to -41.4) | <b>1,200,000</b><br>(1,070,000 to 1,330,000) | <b>30.5</b><br>(27.2 to 34.0)                 | <b>-24.2</b><br>(-35.0 to -13.8) | <b>-49.8</b><br>(-56.4 to -43.5) |
| <b>Central Europe, Eastern Europe, and Central Asia</b> | <b>60,500</b><br>(54,700 to 66,600)          | <b>29.0</b><br>(26.1 to 32.0)                 | <b>-9.5</b><br>(-19.6 to 0.1)    | <b>-29.1</b><br>(-37.0 to -21.5) | <b>39,400</b><br>(35,500 to 43,300)          | <b>14.3</b><br>(12.8 to 16.0)                 | <b>-26.2</b><br>(-33.5 to -18.8) | <b>-47.5</b><br>(-53.4 to -40.5) |
| Central Asia                                            | 13,900<br>(12,100 to 16,200)                 | 37.7<br>(33.6 to 43.1)                        | -54.5<br>(-61.8 to -45.8)        | -49.0<br>(-56.0 to -41.4)        | 10,500<br>(9,130 to 12,300)                  | 25.9<br>(22.7 to 29.8)                        | -58.1<br>(-64.5 to -50.2)        | -55.7<br>(-61.9 to -48.3)        |
| Armenia                                                 | 287<br>(245 to 331)                          | 20.5<br>(17.3 to 23.5)                        | -52.7<br>(-60.9 to -43.1)        | -44.3<br>(-53.7 to -33.9)        | 259<br>(217 to 302)                          | 13.8<br>(11.6 to 16.1)                        | -52.0<br>(-61.4 to -41.4)        | -56.5<br>(-64.3 to -45.9)        |
| Azerbaijan                                              | 1,310<br>(1,010 to 1,650)                    | 37.5<br>(29.8 to 46.3)                        | -71.4<br>(-78.4 to -62.5)        | -64.5<br>(-72.6 to -54.9)        | 1,150<br>(920 to 1,420)                      | 34.4<br>(27.6 to 42.9)                        | -71.6<br>(-78.1 to -63.9)        | -63.6<br>(-71.9 to -52.8)        |
| Georgia                                                 | 413<br>(349 to 479)                          | 19.3<br>(16.5 to 22.3)                        | -61.7<br>(-67.8 to -55.0)        | -61.9<br>(-67.7 to -55.4)        | 353<br>(294 to 413)                          | 9.8<br>(8.3 to 11.4)                          | -58.3<br>(-65.4 to -50.7)        | -73.0<br>(-77.3 to -68.2)        |
| Kazakhstan                                              | 2,470<br>(2,140 to 2,840)                    | 35.3<br>(30.9 to 40.2)                        | -31.1<br>(-41.2 to -18.4)        | -26.6<br>(-36.4 to -14.1)        | 1,550<br>(1,360 to 1,760)                    | 17.3<br>(15.1 to 19.5)                        | -43.4<br>(-51.4 to -34.0)        | -47.4<br>(-54.4 to -39.1)        |

|                        | Male                         |                                               |                                  |                                 | Female                       |                                               |                                  |                                 |
|------------------------|------------------------------|-----------------------------------------------|----------------------------------|---------------------------------|------------------------------|-----------------------------------------------|----------------------------------|---------------------------------|
|                        | 2019                         |                                               | Percent change from 1990 to 2019 |                                 | 2019                         |                                               | Percent change from 1990 to 2019 |                                 |
|                        | Number of deaths             | Age standardized mortality rate (per 100,000) | Number of deaths                 | Age standardized mortality rate | Number of deaths             | Age standardized mortality rate (per 100,000) | Number of deaths                 | Age standardized mortality rate |
| Kyrgyzstan             | 446<br>(381 to 501)          | 17.1<br>(14.9 to 19.0)                        | -75.6<br>(-79.6 to -71.4)        | -75.1<br>(-78.7 to -71.4)       | 325<br>(274 to 370)          | 11.1<br>(9.6 to 12.5)                         | -78.3<br>(-82.1 to -74.0)        | -79.1<br>(-82.4 to -75.1)       |
| Mongolia               | 293<br>(220 to 386)          | 23.1<br>(18.6 to 28.6)                        | -83.1<br>(-87.9 to -74.0)        | -81.8<br>(-86.1 to -73.3)       | 237<br>(181 to 312)          | 15.6<br>(12.1 to 20.1)                        | -82.9<br>(-87.5 to -75.7)        | -83.6<br>(-87.7 to -76.6)       |
| Tajikistan             | 1,900<br>(1,450 to 2,510)    | 53.5<br>(43.9 to 67.8)                        | -55.9<br>(-67.7 to -38.7)        | -51.8<br>(-61.7 to -36.8)       | 1,380<br>(1,060 to 1,880)    | 38.5<br>(31.1 to 51.1)                        | -62.5<br>(-72.3 to -46.9)        | -59.1<br>(-68.2 to -44.8)       |
| Turkmenistan           | 749<br>(587 to 966)          | 31.5<br>(25.4 to 39.5)                        | -72.8<br>(-80.2 to -62.9)        | -69.6<br>(-77.1 to -60.3)       | 534<br>(436 to 659)          | 21.5<br>(17.6 to 26.4)                        | -75.6<br>(-80.7 to -68.4)        | -73.4<br>(-78.8 to -66.1)       |
| Uzbekistan             | 6,050<br>(5,080 to 7,270)    | 46.3<br>(39.9 to 53.8)                        | -40.2<br>(-52.1 to -25.9)        | -32.7<br>(-44.5 to -19.3)       | 4,740<br>(4,010 to 5,680)    | 35.0<br>(29.9 to 40.9)                        | -42.4<br>(-52.9 to -28.7)        | -36.3<br>(-47.4 to -23.3)       |
| Central Europe         | 16,900<br>(14,800 to 19,000) | 21.6<br>(18.9 to 24.3)                        | -5.6<br>(-17.8 to 5.7)           | -39.3<br>(-47.1 to -32.0)       | 13,800<br>(11,900 to 15,500) | 11.2<br>(9.8 to 12.6)                         | -7.1<br>(-18.1 to 4.4)           | -52.3<br>(-57.9 to -46.0)       |
| Albania                | 255<br>(195 to 334)          | 17.1<br>(13.3 to 21.6)                        | -77.4<br>(-83.5 to -62.0)        | -81.2<br>(-85.7 to -63.9)       | 202<br>(157 to 266)          | 11.8<br>(9.3 to 15.3)                         | -80.1<br>(-85.3 to -67.7)        | -81.8<br>(-86.3 to -70.4)       |
| Bosnia and Herzegovina | 216<br>(168 to 276)          | 10.1<br>(8.0 to 12.7)                         | -10.5<br>(-31.9 to 18.9)         | -43.6<br>(-56.2 to -22.8)       | 198<br>(151 to 311)          | 6.6<br>(5.0 to 10.0)                          | -17.5<br>(-38.7 to 34.5)         | -52.0<br>(-63.7 to 22.2)        |



|                 | Male                      |                                               |                                  |                                 | Female                    |                                               |                                  |                                 |
|-----------------|---------------------------|-----------------------------------------------|----------------------------------|---------------------------------|---------------------------|-----------------------------------------------|----------------------------------|---------------------------------|
|                 | 2019                      |                                               | Percent change from 1990 to 2019 |                                 | 2019                      |                                               | Percent change from 1990 to 2019 |                                 |
|                 | Number of deaths          | Age standardized mortality rate (per 100,000) | Number of deaths                 | Age standardized mortality rate | Number of deaths          | Age standardized mortality rate (per 100,000) | Number of deaths                 | Age standardized mortality rate |
| Bulgaria        | 1,170<br>(938 to 1,430)   | 23.1<br>(18.8 to 28.2)                        | -52.3<br>(-61.7 to -41.1)        | -60.3<br>(-68.0 to -51.4)       | 824<br>(662 to 1,010)     | 11.7<br>(9.3 to 14.3)                         | -51.4<br>(-60.7 to -40.9)        | -68.0<br>(-74.2 to -60.7)       |
| Croatia         | 309<br>(247 to 379)       | 9.5<br>(7.6 to 11.6)                          | -31.7<br>(-45.3 to -15.6)        | -58.1<br>(-66.1 to -49.0)       | 270<br>(217 to 331)       | 4.7<br>(3.7 to 5.7)                           | -36.2<br>(-49.4 to -22.4)        | -64.2<br>(-71.5 to -56.6)       |
| Czechia         | 1,750<br>(1,450 to 2,100) | 21.7<br>(18.0 to 25.8)                        | 57.8<br>(31.0 to 89.8)           | -12.4<br>(-27.0 to 4.4)         | 1,630<br>(1,330 to 1,960) | 12.0<br>(9.9 to 14.5)                         | 34.5<br>(12.3 to 59.6)           | -22.6<br>(-35.2 to -7.1)        |
| Hungary         | 596<br>(499 to 713)       | 9.0<br>(7.5 to 10.7)                          | -15.5<br>(-29.4 to 0.6)          | -42.3<br>(-51.4 to -31.5)       | 620<br>(509 to 743)       | 5.0<br>(4.1 to 6.0)                           | 4.2<br>(-12.2 to 23.3)           | -45.2<br>(-53.6 to -34.7)       |
| Montenegro      | 41<br>(33 to 50)          | 11.7<br>(9.5 to 14.4)                         | 27.2<br>(-0.8 to 61.8)           | -13.1<br>(-31.1 to 9.3)         | 28<br>(23 to 37)          | 6.0<br>(4.9 to 7.6)                           | 12.0<br>(-11.4 to 43.0)          | -30.5<br>(-45.5 to -13.3)       |
| North Macedonia | 99<br>(77 to 130)         | 10.0<br>(7.9 to 12.5)                         | -46.7<br>(-61.2 to -25.0)        | -56.1<br>(-66.8 to -40.8)       | 82<br>(62 to 126)         | 7.3<br>(5.8 to 10.4)                          | -51.1<br>(-64.7 to -22.9)        | -64.5<br>(-73.2 to -48.4)       |
| Poland          | 6,480<br>(5,250 to 7,900) | 25.2<br>(20.5 to 30.5)                        | 77.5<br>(43.0 to 117.4)          | 2.1<br>(-16.9 to 23.5)          | 5,430<br>(4,310 to 6,640) | 11.6<br>(9.4 to 14.2)                         | 66.5<br>(36.5 to 100.2)          | -18.7<br>(-33.2 to -1.7)        |
| Romania         | 3,790<br>(3,150 to 4,500) | 29.3<br>(24.9 to 34.5)                        | -30.9<br>(-43.9 to -17.9)        | -48.4<br>(-57.0 to -38.8)       | 2,570<br>(2,150 to 3,040) | 15.2<br>(12.9 to 17.7)                        | -36.5<br>(-47.4 to -23.9)        | -62.6<br>(-68.4 to -55.3)       |

|                | Male                         |                                               |                                  |                                 | Female                       |                                               |                                  |                                 |
|----------------|------------------------------|-----------------------------------------------|----------------------------------|---------------------------------|------------------------------|-----------------------------------------------|----------------------------------|---------------------------------|
|                | 2019                         |                                               | Percent change from 1990 to 2019 |                                 | 2019                         |                                               | Percent change from 1990 to 2019 |                                 |
|                | Number of deaths             | Age standardized mortality rate (per 100,000) | Number of deaths                 | Age standardized mortality rate | Number of deaths             | Age standardized mortality rate (per 100,000) | Number of deaths                 | Age standardized mortality rate |
| Serbia         | 892<br>(688 to 1,110)        | 14.5<br>(11.4 to 17.7)                        | 27.1<br>(-9.0 to 66.3)           | -20.0<br>(-41.8 to 4.7)         | 680<br>(531 to 852)          | 9.0<br>(7.0 to 11.0)                          | 12.7<br>(-14.7 to 44.9)          | -33.3<br>(-49.3 to -13.4)       |
| Slovakia       | 968<br>(750 to 1,210)        | 30.4<br>(23.9 to 37.6)                        | -35.5<br>(-49.9 to -16.0)        | -55.2<br>(-64.8 to -41.9)       | 883<br>(680 to 1,130)        | 16.2<br>(12.6 to 20.7)                        | -31.3<br>(-48.9 to 6.1)          | -59.3<br>(-69.6 to -38.0)       |
| Slovenia       | 326<br>(259 to 413)          | 19.5<br>(15.7 to 24.4)                        | 31.4<br>(-2.8 to 76.5)           | -38.2<br>(-53.5 to -19.2)       | 368<br>(275 to 462)          | 9.8<br>(7.5 to 12.3)                          | 33.6<br>(-3.6 to 76.8)           | -49.7<br>(-62.8 to -33.7)       |
| Eastern Europe | 29,700<br>(25,600 to 34,100) | 25.0<br>(21.7 to 28.5)                        | 61.1<br>(39.0 to 85.2)           | 15.9<br>(0.9 to 32.1)           | 15,100<br>(13,100 to 17,200) | 8.6<br>(7.5 to 9.8)                           | 12.5<br>(-1.5 to 28.4)           | -23.1<br>(-32.8 to -12.3)       |
| Belarus        | 709<br>(559 to 893)          | 13.4<br>(10.7 to 16.6)                        | 1.9<br>(-19.3 to 28.8)           | -22.8<br>(-37.8 to -3.4)        | 446<br>(360 to 553)          | 4.4<br>(3.6 to 5.5)                           | -26.0<br>(-40.3 to -7.7)         | -55.6<br>(-64.3 to -44.1)       |
| Estonia        | 126<br>(99 to 157)           | 14.6<br>(11.6 to 17.9)                        | -2.3<br>(-24.5 to 21.9)          | -25.2<br>(-41.3 to -7.3)        | 97<br>(77 to 119)            | 5.6<br>(4.6 to 6.8)                           | 8.6<br>(-12.8 to 33.4)           | -34.9<br>(-47.5 to -20.1)       |
| Latvia         | 196<br>(156 to 243)          | 15.9<br>(12.8 to 19.6)                        | -11.5<br>(-30.5 to 10.5)         | -15.3<br>(-32.7 to 4.8)         | 155<br>(122 to 197)          | 6.5<br>(5.1 to 8.4)                           | -4.4<br>(-24.0 to 22.4)          | -24.8<br>(-40.7 to -2.3)        |
| Lithuania      | 312<br>(254 to 378)          | 16.6<br>(13.7 to 19.9)                        | 48.6<br>(20.6 to 81.7)           | 26.1<br>(3.5 to 52.5)           | 219<br>(179 to 259)          | 6.2<br>(5.2 to 7.4)                           | 32.0<br>(9.3 to 56.3)            | -9.3<br>(-24.7 to 7.7)          |

|                          | Male                                    |                                               |                                  |                                   | Female                                  |                                               |                                  |                                   |
|--------------------------|-----------------------------------------|-----------------------------------------------|----------------------------------|-----------------------------------|-----------------------------------------|-----------------------------------------------|----------------------------------|-----------------------------------|
|                          | 2019                                    |                                               | Percent change from 1990 to 2019 |                                   | 2019                                    |                                               | Percent change from 1990 to 2019 |                                   |
|                          | Number of deaths                        | Age standardized mortality rate (per 100,000) | Number of deaths                 | Age standardized mortality rate   | Number of deaths                        | Age standardized mortality rate (per 100,000) | Number of deaths                 | Age standardized mortality rate   |
| Republic of Moldova      | 619<br>(536 to 705)                     | 30.0<br>(26.2 to 33.8)                        | -14.9<br>(-28.7 to 0.8)          | -23.7<br>(-34.9 to -10.6)         | 253<br>(218 to 287)                     | 10.7<br>(9.3 to 12.1)                         | -48.0<br>(-56.5 to -38.7)        | -55.6<br>(-62.6 to -47.3)         |
| Russian Federation       | 21,800<br>(18,100 to 25,900)            | 26.5<br>(22.2 to 31.2)                        | 65.4<br>(36.7 to 97.5)           | 12.2<br>(-6.5 to 32.4)            | 11,200<br>(9,370 to 13,100)             | 9.3<br>(7.8 to 10.8)                          | 20.9<br>(2.4 to 41.7)            | -22.9<br>(-34.7 to -9.4)          |
| Ukraine                  | 6,010<br>(4,830 to 7,520)               | 24.0<br>(19.6 to 29.7)                        | 81.3<br>(44.7 to 129.4)          | 49.0<br>(20.9 to 86.7)            | 2,720<br>(2,210 to 3,310)               | 7.5<br>(6.1 to 9.1)                           | 2.7<br>(-16.6 to 25.9)           | -7.9<br>(-25.3 to 13.8)           |
| <b>High-income</b>       | <b>218,000<br/>(194,000 to 231,000)</b> | <b>22.4<br/>(19.9 to 23.8)</b>                | <b>53.2<br/>(42.9 to 59.4)</b>   | <b>-35.3<br/>(-38.6 to -33.1)</b> | <b>218,000<br/>(177,000 to 240,000)</b> | <b>13.2<br/>(11.1 to 14.4)</b>                | <b>47.1<br/>(33.5 to 55.1)</b>   | <b>-34.1<br/>(-38.2 to -31.3)</b> |
| Australasia              | 2,290<br>(1,970 to 2,530)               | 10.0<br>(8.7 to 11.0)                         | 74.8<br>(57.3 to 91.9)           | -43.1<br>(-48.1 to -38.0)         | 2,880<br>(2,260 to 3,280)               | 8.0<br>(6.4 to 9.0)                           | 90.5<br>(68.7 to 109.2)          | -31.8<br>(-38.8 to -25.5)         |
| Australia                | 1,900<br>(1,640 to 2,110)               | 9.9<br>(8.5 to 10.9)                          | 115.3<br>(91.1 to 140.2)         | -29.1<br>(-36.1 to -21.6)         | 2,370<br>(1,850 to 2,720)               | 7.9<br>(6.3 to 8.9)                           | 151.9<br>(120.5 to 182.3)        | -10.9<br>(-20.9 to -1.5)          |
| New Zealand              | 391<br>(338 to 444)                     | 11.0<br>(9.5 to 12.4)                         | -8.6<br>(-20.4 to 4.2)           | -68.5<br>(-72.2 to -64.3)         | 505<br>(392 to 591)                     | 8.9<br>(7.1 to 10.3)                          | -11.2<br>(-23.4 to 1.8)          | -66.0<br>(-70.2 to -61.6)         |
| High-income Asia Pacific | 78,700<br>(66,900 to 85,400)            | 35.3<br>(30.2 to 38.4)                        | 101.6<br>(79.8 to 114.6)         | -44.7<br>(-49.6 to -41.6)         | 59,300<br>(42,700 to 69,300)            | 13.9<br>(10.5 to 15.9)                        | 99.6<br>(60.9 to 122.2)          | -53.7<br>(-60.9 to -49.6)         |

|                           | Male                         |                                               |                                  |                                 | Female                       |                                               |                                  |                                 |
|---------------------------|------------------------------|-----------------------------------------------|----------------------------------|---------------------------------|------------------------------|-----------------------------------------------|----------------------------------|---------------------------------|
|                           | 2019                         |                                               | Percent change from 1990 to 2019 |                                 | 2019                         |                                               | Percent change from 1990 to 2019 |                                 |
|                           | Number of deaths             | Age standardized mortality rate (per 100,000) | Number of deaths                 | Age standardized mortality rate | Number of deaths             | Age standardized mortality rate (per 100,000) | Number of deaths                 | Age standardized mortality rate |
| Brunei Darussalam         | 46<br>(38 to 56)             | 85.7<br>(71.6 to 100.5)                       | 130.9<br>(63.1 to 190.4)         | 14.1<br>(-21.1 to 44.1)         | 35<br>(27 to 41)             | 40.1<br>(31.7 to 46.4)                        | 186.3<br>(83.0 to 260.9)         | 26.4<br>(-23.2 to 62.5)         |
| Japan                     | 68,700<br>(57,600 to 74,900) | 36.0<br>(30.5 to 39.1)                        | 90.8<br>(69.5 to 103.9)          | -45.2<br>(-50.0 to -42.1)       | 50,100<br>(35,600 to 59,000) | 13.5<br>(10.1 to 15.5)                        | 87.2<br>(49.8 to 108.7)          | -55.5<br>(-61.9 to -51.6)       |
| Republic of Korea         | 8,060<br>(4,480 to 9,290)    | 29.3<br>(16.6 to 33.9)                        | 244.9<br>(59.6 to 306.9)         | -7.0<br>(-61.5 to 10.6)         | 7,570<br>(3,960 to 9,280)    | 14.7<br>(7.8 to 18.0)                         | 226.4<br>(67.8 to 305.2)         | -23.5<br>(-60.9 to -5.2)        |
| Singapore                 | 1,840<br>(1,610 to 2,000)    | 65.1<br>(55.9 to 71.3)                        | 178.8<br>(150.1 to 204.6)        | -34.3<br>(-40.4 to -28.2)       | 1,640<br>(1,290 to 1,860)    | 39.5<br>(31.3 to 44.6)                        | 158.3<br>(120.4 to 186.5)        | -41.2<br>(-48.4 to -35.2)       |
| High-income North America | 43,100<br>(39,200 to 45,600) | 15.6<br>(14.2 to 16.4)                        | 10.7<br>(6.4 to 15.2)            | -47.4<br>(-49.1 to -45.5)       | 48,000<br>(40,600 to 52,200) | 11.5<br>(10.0 to 12.3)                        | 18.7<br>(12.9 to 24.6)           | -33.7<br>(-36.0 to -30.7)       |
| Canada                    | 4,090<br>(3,530 to 4,540)    | 13.4<br>(11.6 to 14.8)                        | 25.9<br>(12.5 to 39.4)           | -54.5<br>(-58.8 to -49.9)       | 5,040<br>(4,030 to 5,730)    | 10.3<br>(8.5 to 11.6)                         | 51.4<br>(34.7 to 68.8)           | -40.9<br>(-46.5 to -34.7)       |
| Greenland                 | 7<br>(6 to 9)                | 31.1<br>(24.2 to 36.8)                        | 9.8<br>(-17.6 to 38.5)           | -44.9<br>(-56.8 to -32.4)       | 5<br>(4 to 6)                | 20.4<br>(15.7 to 25.0)                        | -14.1<br>(-34.2 to 10.6)         | -53.5<br>(-64.3 to -40.1)       |
| United States of America  | 39,000<br>(35,500 to 41,200) | 15.9<br>(14.5 to 16.7)                        | 9.4<br>(5.1 to 13.8)             | -46.6<br>(-48.4 to -44.7)       | 42,900<br>(36,400 to 46,600) | 11.6<br>(10.2 to 12.4)                        | 15.8<br>(10.2 to 21.7)           | -33.0<br>(-35.4 to -30.0)       |

|                        | Male                         |                                               |                                  |                                 | Female                       |                                               |                                  |                                 |
|------------------------|------------------------------|-----------------------------------------------|----------------------------------|---------------------------------|------------------------------|-----------------------------------------------|----------------------------------|---------------------------------|
|                        | 2019                         |                                               | Percent change from 1990 to 2019 |                                 | 2019                         |                                               | Percent change from 1990 to 2019 |                                 |
|                        | Number of deaths             | Age standardized mortality rate (per 100,000) | Number of deaths                 | Age standardized mortality rate | Number of deaths             | Age standardized mortality rate (per 100,000) | Number of deaths                 | Age standardized mortality rate |
| Southern Latin America | 20,200<br>(18,500 to 21,700) | 60.5<br>(55.4 to 65.1)                        | 135.3<br>(116.9 to 153.6)        | 24.5<br>(15.5 to 33.4)          | 22,400<br>(19,500 to 24,500) | 42.6<br>(37.4 to 46.6)                        | 205.9<br>(176.7 to 233.0)        | 38.2<br>(27.4 to 49.7)          |
| Argentina              | 17,200<br>(15,800 to 18,700) | 80.9<br>(73.6 to 87.5)                        | 264.8<br>(233.8 to 299.1)        | 108.3<br>(90.8 to 126.4)        | 19,000<br>(16,500 to 20,900) | 55.1<br>(48.4 to 60.6)                        | 380.6<br>(334.4 to 429.9)        | 133.0<br>(111.4 to 156.2)       |
| Chile                  | 2,260<br>(1,990 to 2,480)    | 23.7<br>(20.7 to 26.0)                        | -34.3<br>(-41.1 to -27.6)        | -72.7<br>(-75.3 to -69.9)       | 2,440<br>(2,040 to 2,720)    | 17.8<br>(14.9 to 19.9)                        | -17.1<br>(-27.8 to -8.2)         | -73.0<br>(-76.0 to -70.3)       |
| Uruguay                | 671<br>(600 to 739)          | 30.0<br>(26.8 to 32.9)                        | 66.7<br>(49.5 to 84.4)           | 5.3<br>(-4.9 to 16.5)           | 924<br>(773 to 1,030)        | 21.9<br>(18.8 to 24.2)                        | 121.2<br>(96.1 to 145.6)         | 10.9<br>(-0.1 to 22.3)          |
| Western Europe         | 73,700<br>(66,100 to 78,500) | 17.4<br>(15.6 to 18.5)                        | 35.3<br>(27.3 to 41.9)           | -39.2<br>(-42.0 to -36.6)       | 85,400<br>(70,600 to 93,500) | 11.3<br>(9.6 to 12.3)                         | 23.4<br>(13.9 to 30.2)           | -38.8<br>(-42.3 to -35.9)       |
| Andorra                | 9<br>(7 to 11)               | 13.2<br>(10.3 to 16.2)                        | 183.4<br>(97.2 to 300.8)         | -30.7<br>(-49.9 to -4.4)        | 11<br>(8 to 15)              | 11.5<br>(8.2 to 15.2)                         | 338.9<br>(189.4 to 526.0)        | -24.8<br>(-48.3 to 6.0)         |
| Austria                | 581<br>(510 to 642)          | 7.4<br>(6.4 to 8.1)                           | -4.3<br>(-14.6 to 6.4)           | -54.6<br>(-59.2 to -49.8)       | 624<br>(511 to 707)          | 4.4<br>(3.7 to 4.9)                           | -18.6<br>(-28.3 to -8.9)         | -54.6<br>(-59.2 to -50.0)       |
| Belgium                | 2,920<br>(2,550 to 3,210)    | 27.3<br>(23.9 to 30.0)                        | 71.8<br>(54.2 to 89.9)           | -19.2<br>(-26.7 to -11.3)       | 3,420<br>(2,710 to 3,870)    | 17.4<br>(14.2 to 19.5)                        | 94.3<br>(71.0 to 117.4)          | 0.3<br>(-9.6 to 11.0)           |

|         | Male                         |                                               |                                  |                                 | Female                       |                                               |                                  |                                 |
|---------|------------------------------|-----------------------------------------------|----------------------------------|---------------------------------|------------------------------|-----------------------------------------------|----------------------------------|---------------------------------|
|         | 2019                         |                                               | Percent change from 1990 to 2019 |                                 | 2019                         |                                               | Percent change from 1990 to 2019 |                                 |
|         | Number of deaths             | Age standardized mortality rate (per 100,000) | Number of deaths                 | Age standardized mortality rate | Number of deaths             | Age standardized mortality rate (per 100,000) | Number of deaths                 | Age standardized mortality rate |
| Cyprus  | 76<br>(63 to 92)             | 11.6<br>(9.6 to 13.9)                         | 24.9<br>(-2.7 to 63.1)           | -53.6<br>(-62.9 to -40.8)       | 93<br>(76 to 122)            | 11.2<br>(9.1 to 14.7)                         | 16.7<br>(-11.5 to 66.4)          | -65.5<br>(-72.7 to -53.0)       |
| Denmark | 1,160<br>(1,010 to 1,290)    | 23.5<br>(20.3 to 26.1)                        | 41.9<br>(25.8 to 58.5)           | -14.8<br>(-24.3 to -5.1)        | 1,310<br>(1,050 to 1,500)    | 15.4<br>(12.6 to 17.5)                        | 28.8<br>(12.9 to 45.5)           | -16.6<br>(-26.5 to -6.2)        |
| Finland | 375<br>(333 to 419)          | 7.0<br>(6.2 to 7.8)                           | -66.5<br>(-70.1 to -62.5)        | -87.3<br>(-88.6 to -85.9)       | 400<br>(323 to 457)          | 4.0<br>(3.4 to 4.6)                           | -72.6<br>(-75.9 to -69.2)        | -86.9<br>(-88.3 to -85.4)       |
| France  | 10,200<br>(8,700 to 11,500)  | 15.4<br>(13.2 to 17.3)                        | 26.6<br>(11.6 to 41.8)           | -46.5<br>(-52.0 to -40.5)       | 12,900<br>(9,770 to 15,000)  | 9.4<br>(7.3 to 10.7)                          | 34.2<br>(13.3 to 51.4)           | -40.6<br>(-48.1 to -34.0)       |
| Germany | 12,800<br>(11,400 to 14,300) | 14.8<br>(13.2 to 16.4)                        | 47.7<br>(32.1 to 64.3)           | -31.0<br>(-37.5 to -23.9)       | 12,200<br>(10,300 to 13,700) | 8.5<br>(7.2 to 9.4)                           | 17.9<br>(6.4 to 31.3)            | -27.9<br>(-33.9 to -20.3)       |
| Greece  | 2,740<br>(2,360 to 3,060)    | 20.5<br>(17.9 to 22.6)                        | 184.4<br>(150.9 to 222.2)        | 24.8<br>(11.9 to 39.9)          | 3,220<br>(2,690 to 3,640)    | 17.6<br>(15.0 to 19.6)                        | 246.1<br>(201.1 to 290.7)        | 45.3<br>(29.3 to 61.3)          |
| Iceland | 48<br>(41 to 55)             | 17.8<br>(15.1 to 20.3)                        | 21.0<br>(4.3 to 39.8)            | -44.9<br>(-52.2 to -36.5)       | 54<br>(40 to 65)             | 12.0<br>(9.3 to 14.1)                         | -12.5<br>(-27.0 to 0.7)          | -63.7<br>(-69.0 to -58.5)       |
| Ireland | 735<br>(638 to 830)          | 24.3<br>(20.9 to 27.3)                        | -13.6<br>(-24.2 to -2.9)         | -60.9<br>(-65.4 to -56.1)       | 978<br>(777 to 1,110)        | 20.1<br>(16.2 to 22.8)                        | -3.5<br>(-16.8 to 8.4)           | -56.3<br>(-61.6 to -51.1)       |

|             | Male                      |                                               |                                  |                                 | Female                    |                                               |                                  |                                 |
|-------------|---------------------------|-----------------------------------------------|----------------------------------|---------------------------------|---------------------------|-----------------------------------------------|----------------------------------|---------------------------------|
|             | 2019                      |                                               | Percent change from 1990 to 2019 |                                 | 2019                      |                                               | Percent change from 1990 to 2019 |                                 |
|             | Number of deaths          | Age standardized mortality rate (per 100,000) | Number of deaths                 | Age standardized mortality rate | Number of deaths          | Age standardized mortality rate (per 100,000) | Number of deaths                 | Age standardized mortality rate |
| Israel      | 839<br>(732 to 930)       | 15.6<br>(13.6 to 17.3)                        | 134.7<br>(109.5 to 162.7)        | -15.5<br>(-24.3 to -5.9)        | 900<br>(746 to 1,020)     | 11.6<br>(9.7 to 13.1)                         | 147.5<br>(114.0 to 177.3)        | -28.9<br>(-37.3 to -21.2)       |
| Italy       | 5,850<br>(5,100 to 6,300) | 8.7<br>(7.6 to 9.4)                           | 40.3<br>(27.7 to 49.3)           | -40.4<br>(-44.3 to -37.1)       | 6,540<br>(5,270 to 7,270) | 5.2<br>(4.3 to 5.7)                           | 46.7<br>(28.7 to 57.7)           | -43.8<br>(-48.8 to -40.4)       |
| Luxembourg  | 61<br>(51 to 70)          | 14.3<br>(11.9 to 16.5)                        | 43.7<br>(20.3 to 69.8)           | -43.8<br>(-52.7 to -34.0)       | 76<br>(58 to 92)          | 9.8<br>(7.7 to 11.7)                          | 64.4<br>(32.6 to 97.3)           | -32.1<br>(-43.9 to -19.0)       |
| Malta       | 88<br>(76 to 101)         | 23.1<br>(19.9 to 26.5)                        | 86.5<br>(58.8 to 115.6)          | -30.9<br>(-40.4 to -20.3)       | 103<br>(80 to 121)        | 15.9<br>(12.7 to 18.6)                        | 125.5<br>(88.0 to 162.2)         | -23.5<br>(-34.8 to -10.9)       |
| Monaco      | 12<br>(9 to 14)           | 23.9<br>(19.2 to 29.0)                        | 74.2<br>(21.2 to 129.2)          | -1.2<br>(-29.7 to 27.4)         | 13<br>(9 to 16)           | 16.3<br>(12.1 to 20.3)                        | 61.6<br>(13.6 to 119.5)          | 7.0<br>(-24.5 to 42.7)          |
| Netherlands | 2,910<br>(2,520 to 3,250) | 20.7<br>(17.9 to 23.2)                        | 70.0<br>(52.0 to 88.6)           | -21.3<br>(-29.0 to -12.7)       | 3,420<br>(2,800 to 3,900) | 13.8<br>(11.5 to 15.6)                        | 51.7<br>(35.3 to 67.7)           | -18.7<br>(-26.9 to -10.7)       |
| Norway      | 909<br>(798 to 987)       | 20.5<br>(18.0 to 22.3)                        | -29.1<br>(-33.7 to -24.5)        | -58.2<br>(-60.6 to -55.6)       | 1,130<br>(900 to 1,260)   | 14.0<br>(11.4 to 15.5)                        | -33.6<br>(-38.9 to -28.7)        | -58.8<br>(-61.6 to -55.9)       |
| Portugal    | 4,090<br>(3,560 to 4,500) | 37.5<br>(32.7 to 41.2)                        | 133.4<br>(104.4 to 159.1)        | -4.4<br>(-15.0 to 5.3)          | 4,180<br>(3,380 to 4,720) | 21.2<br>(17.5 to 23.7)                        | 166.5<br>(128.3 to 196.6)        | -5.7<br>(-17.2 to 4.1)          |

|                                    | Male                                  |                                               |                                  |                                   | Female                                |                                               |                                  |                                   |
|------------------------------------|---------------------------------------|-----------------------------------------------|----------------------------------|-----------------------------------|---------------------------------------|-----------------------------------------------|----------------------------------|-----------------------------------|
|                                    | 2019                                  |                                               | Percent change from 1990 to 2019 |                                   | 2019                                  |                                               | Percent change from 1990 to 2019 |                                   |
|                                    | Number of deaths                      | Age standardized mortality rate (per 100,000) | Number of deaths                 | Age standardized mortality rate   | Number of deaths                      | Age standardized mortality rate (per 100,000) | Number of deaths                 | Age standardized mortality rate   |
| San Marino                         | 4<br>(3 to 6)                         | 13.2<br>(9.2 to 17.6)                         | 108.1<br>(39.9 to 183.6)         | -27.7<br>(-50.7 to -0.6)          | 3<br>(2 to 5)                         | 6.3<br>(4.3 to 9.0)                           | 122.0<br>(49.1 to 223.6)         | -23.4<br>(-48.9 to 12.8)          |
| Spain                              | 6,670<br>(5,780 to 7,460)             | 14.5<br>(12.7 to 16.1)                        | 47.9<br>(31.3 to 65.3)           | -40.0<br>(-46.4 to -33.5)         | 7,510<br>(5,870 to 8,720)             | 8.7<br>(7.1 to 10.0)                          | 66.8<br>(45.1 to 87.8)           | -40.3<br>(-46.9 to -33.8)         |
| Sweden                             | 1,410<br>(1,220 to 1,560)             | 13.3<br>(11.6 to 14.7)                        | -32.6<br>(-39.9 to -24.9)        | -61.6<br>(-65.3 to -57.3)         | 1,440<br>(1,150 to 1,630)             | 8.5<br>(7.0 to 9.6)                           | -34.2<br>(-41.4 to -26.6)        | -58.1<br>(-62.3 to -53.8)         |
| Switzerland                        | 869<br>(745 to 974)                   | 10.4<br>(8.9 to 11.6)                         | -22.5<br>(-31.5 to -13.7)        | -65.7<br>(-69.3 to -62.0)         | 1,080<br>(834 to 1,260)               | 7.1<br>(5.7 to 8.1)                           | -26.1<br>(-35.1 to -16.7)        | -64.0<br>(-67.9 to -60.0)         |
| United Kingdom                     | 18,200<br>(16,400 to 19,200)          | 31.6<br>(28.4 to 33.4)                        | 26.6<br>(19.7 to 32.5)           | -37.7<br>(-40.2 to -35.1)         | 23,700<br>(20,000 to 25,700)          | 25.4<br>(21.9 to 27.4)                        | 0.9<br>(-5.3 to 8.0)             | -34.2<br>(-37.3 to -29.8)         |
| <b>Latin America and Caribbean</b> | <b>97,700<br/>(86,400 to 108,000)</b> | <b>39.7<br/>(35.0 to 44.1)</b>                | <b>-0.1<br/>(-12.8 to 12.2)</b>  | <b>-40.7<br/>(-46.9 to -33.9)</b> | <b>93,700<br/>(80,800 to 104,000)</b> | <b>30.8<br/>(26.5 to 34.2)</b>                | <b>11.2<br/>(-5.2 to 25.6)</b>   | <b>-45.0<br/>(-51.4 to -38.7)</b> |
| Andean Latin America               | 15,200<br>(12,100 to 18,900)          | 59.3<br>(47.2 to 73.0)                        | -16.5<br>(-36.9 to 6.3)          | -47.7<br>(-58.8 to -35.4)         | 15,000<br>(12,000 to 18,200)          | 52.1<br>(41.7 to 63.4)                        | -12.7<br>(-31.6 to 6.7)          | -51.9<br>(-60.9 to -42.1)         |
| Bolivia (Plurinational State of)   | 3,200<br>(2,510 to 3,920)             | 81.6<br>(63.4 to 101.1)                       | -41.2<br>(-58.6 to -17.3)        | -52.2<br>(-64.7 to -37.9)         | 3,370<br>(2,730 to 4,310)             | 79.4<br>(63.7 to 101.8)                       | -29.8<br>(-47.9 to 7.7)          | -47.9<br>(-59.7 to -34.3)         |



|                     | Male                       |                                               |                                  |                                 | Female                     |                                               |                                  |                                 |
|---------------------|----------------------------|-----------------------------------------------|----------------------------------|---------------------------------|----------------------------|-----------------------------------------------|----------------------------------|---------------------------------|
|                     | 2019                       |                                               | Percent change from 1990 to 2019 |                                 | 2019                       |                                               | Percent change from 1990 to 2019 |                                 |
|                     | Number of deaths           | Age standardized mortality rate (per 100,000) | Number of deaths                 | Age standardized mortality rate | Number of deaths           | Age standardized mortality rate (per 100,000) | Number of deaths                 | Age standardized mortality rate |
| Ecuador             | 2,810<br>(2,260 to 3,550)  | 45.5<br>(37.1 to 57.0)                        | 22.2<br>(-2.7 to 55.0)           | -28.2<br>(-41.7 to -10.4)       | 2,630<br>(2,160 to 3,370)  | 38.5<br>(31.7 to 49.1)                        | 15.8<br>(-6.6 to 48.9)           | -46.0<br>(-55.7 to -30.5)       |
| Peru                | 9,200<br>(6,930 to 12,000) | 59.4<br>(44.6 to 77.8)                        | -12.2<br>(-37.1 to 17.4)         | -49.6<br>(-63.0 to -33.3)       | 8,980<br>(6,640 to 11,500) | 51.0<br>(37.8 to 65.5)                        | -11.0<br>(-33.8 to 16.6)         | -53.9<br>(-65.1 to -39.9)       |
| Caribbean           | 9,920<br>(8,470 to 11,500) | 44.4<br>(37.8 to 51.8)                        | 6.9<br>(-11.3 to 28.1)           | -28.4<br>(-39.4 to -15.6)       | 9,260<br>(7,800 to 10,800) | 34.8<br>(29.0 to 40.9)                        | 11.3<br>(-7.6 to 34.0)           | -33.8<br>(-44.6 to -21.4)       |
| Antigua and Barbuda | 14<br>(12 to 17)           | 40.5<br>(34.3 to 47.9)                        | 35.8<br>(12.9 to 63.7)           | -19.1<br>(-32.0 to -3.5)        | 16<br>(13 to 18)           | 33.8<br>(28.4 to 39.0)                        | 39.5<br>(16.7 to 66.6)           | 15.4<br>(-3.3 to 37.1)          |
| Bahamas             | 50<br>(42 to 60)           | 36.6<br>(30.3 to 43.6)                        | 46.5<br>(18.9 to 81.9)           | -36.7<br>(-47.9 to -22.6)       | 43<br>(36 to 52)           | 23.5<br>(19.3 to 27.9)                        | 52.5<br>(25.8 to 85.1)           | -29.1<br>(-41.7 to -13.9)       |
| Barbados            | 77<br>(63 to 91)           | 39.3<br>(32.5 to 46.2)                        | 82.7<br>(48.0 to 119.5)          | 5.1<br>(-14.6 to 24.7)          | 88<br>(72 to 103)          | 32.3<br>(26.5 to 38.0)                        | 94.6<br>(60.5 to 130.6)          | 27.3<br>(5.3 to 50.2)           |
| Belize              | 63<br>(54 to 73)           | 49.4<br>(41.8 to 57.4)                        | 82.6<br>(52.3 to 118.1)          | -7.8<br>(-22.5 to 10.1)         | 49<br>(41 to 56)           | 37.5<br>(31.6 to 43.4)                        | 37.3<br>(15.9 to 63.2)           | -28.6<br>(-39.1 to -16.5)       |
| Bermuda             | 8<br>(7 to 10)             | 16.2<br>(13.7 to 19.3)                        | 47.5<br>(22.2 to 80.8)           | -41.1<br>(-51.0 to -28.3)       | 9<br>(7 to 12)             | 10.7<br>(8.4 to 13.3)                         | 42.0<br>(13.6 to 75.2)           | -48.9<br>(-58.4 to -36.4)       |

|                    | Male                      |                                               |                                  |                                 | Female                    |                                               |                                  |                                 |
|--------------------|---------------------------|-----------------------------------------------|----------------------------------|---------------------------------|---------------------------|-----------------------------------------------|----------------------------------|---------------------------------|
|                    | 2019                      |                                               | Percent change from 1990 to 2019 |                                 | 2019                      |                                               | Percent change from 1990 to 2019 |                                 |
|                    | Number of deaths          | Age standardized mortality rate (per 100,000) | Number of deaths                 | Age standardized mortality rate | Number of deaths          | Age standardized mortality rate (per 100,000) | Number of deaths                 | Age standardized mortality rate |
| Cuba               | 3,710<br>(3,040 to 4,450) | 41.5<br>(34.0 to 49.6)                        | 103.2<br>(67.5 to 141.5)         | 4.6<br>(-13.3 to 24.2)          | 3,410<br>(2,750 to 4,120) | 29.7<br>(24.1 to 35.7)                        | 134.6<br>(95.1 to 175.8)         | -2.8<br>(-19.1 to 14.2)         |
| Dominica           | 16<br>(13 to 20)          | 43.8<br>(34.9 to 53.9)                        | 16.9<br>(-8.3 to 46.1)           | -9.3<br>(-28.4 to 12.9)         | 14<br>(11 to 17)          | 29.0<br>(23.0 to 36.0)                        | -1.0<br>(-21.2 to 25.9)          | -7.7<br>(-27.0 to 16.8)         |
| Dominican Republic | 1,070<br>(817 to 1,390)   | 24.7<br>(19.1 to 32.0)                        | -3.1<br>(-29.8 to 38.0)          | -24.3<br>(-42.9 to 1.8)         | 945<br>(731 to 1,220)     | 20.4<br>(15.8 to 26.4)                        | -12.2<br>(-36.4 to 20.7)         | -37.9<br>(-53.1 to -19.5)       |
| Grenada            | 20<br>(18 to 23)          | 58.0<br>(51.3 to 65.4)                        | -24.0<br>(-35.1 to -11.0)        | -28.7<br>(-38.5 to -17.1)       | 27<br>(23 to 30)          | 49.9<br>(42.5 to 56.4)                        | -15.0<br>(-28.9 to -1.3)         | -16.6<br>(-30.2 to -2.9)        |
| Guyana             | 143<br>(111 to 179)       | 59.8<br>(47.7 to 72.8)                        | -8.8<br>(-31.8 to 19.6)          | -22.8<br>(-39.3 to -1.9)        | 119<br>(92 to 148)        | 44.0<br>(34.6 to 54.0)                        | 2.0<br>(-23.0 to 30.8)           | -20.2<br>(-39.4 to 0.8)         |
| Haiti              | 3,260<br>(2,320 to 4,310) | 78.5<br>(52.4 to 107.5)                       | -27.2<br>(-51.1 to 1.8)          | -43.8<br>(-57.9 to -27.3)       | 3,060<br>(2,220 to 4,060) | 73.2<br>(52.2 to 99.5)                        | -26.5<br>(-48.1 to 1.5)          | -42.5<br>(-57.0 to -24.7)       |
| Jamaica            | 225<br>(180 to 277)       | 16.1<br>(12.8 to 19.9)                        | -3.4<br>(-21.8 to 17.7)          | -38.3<br>(-50.4 to -24.2)       | 250<br>(195 to 304)       | 12.9<br>(10.2 to 15.9)                        | 2.8<br>(-16.1 to 23.6)           | -40.6<br>(-51.4 to -27.7)       |
| Puerto Rico        | 612<br>(483 to 763)       | 19.2<br>(15.1 to 24.0)                        | -13.1<br>(-30.4 to 7.1)          | -58.8<br>(-66.9 to -48.9)       | 655<br>(507 to 805)       | 13.6<br>(10.6 to 16.8)                        | 16.0<br>(-6.1 to 42.5)           | -56.5<br>(-65.1 to -46.5)       |

|                                  | Male                         |                                               |                                  |                                 | Female                       |                                               |                                  |                                 |
|----------------------------------|------------------------------|-----------------------------------------------|----------------------------------|---------------------------------|------------------------------|-----------------------------------------------|----------------------------------|---------------------------------|
|                                  | 2019                         |                                               | Percent change from 1990 to 2019 |                                 | 2019                         |                                               | Percent change from 1990 to 2019 |                                 |
|                                  | Number of deaths             | Age standardized mortality rate (per 100,000) | Number of deaths                 | Age standardized mortality rate | Number of deaths             | Age standardized mortality rate (per 100,000) | Number of deaths                 | Age standardized mortality rate |
| Saint Kitts and Nevis            | 10<br>(9 to 12)              | 49.6<br>(43.1 to 56.4)                        | -2.7<br>(-21.5 to 19.1)          | -36.3<br>(-46.1 to -24.6)       | 9<br>(8 to 11)               | 34.8<br>(29.1 to 40.8)                        | -20.6<br>(-34.8 to -3.3)         | -43.2<br>(-52.8 to -31.8)       |
| Saint Lucia                      | 28<br>(24 to 33)             | 35.5<br>(29.8 to 41.5)                        | 60.6<br>(33.9 to 92.1)           | -33.4<br>(-44.2 to -20.6)       | 26<br>(21 to 31)             | 23.8<br>(19.5 to 28.2)                        | 43.7<br>(19.8 to 70.2)           | -37.0<br>(-47.4 to -25.1)       |
| Saint Vincent and the Grenadines | 21<br>(18 to 25)             | 39.5<br>(34.3 to 45.1)                        | 50.0<br>(25.6 to 78.8)           | -19.0<br>(-31.5 to -4.0)        | 18<br>(15 to 21)             | 30.3<br>(25.8 to 35.3)                        | 15.9<br>(-0.9 to 36.4)           | -18.2<br>(-30.1 to -3.7)        |
| Suriname                         | 90<br>(72 to 110)            | 38.8<br>(31.6 to 47.5)                        | 49.0<br>(17.7 to 86.9)           | -18.1<br>(-34.2 to 1.9)         | 74<br>(59 to 90)             | 24.7<br>(19.7 to 30.2)                        | 50.6<br>(21.7 to 85.7)           | -21.9<br>(-36.2 to -4.8)        |
| Trinidad and Tobago              | 149<br>(114 to 190)          | 20.8<br>(15.9 to 26.3)                        | -19.8<br>(-38.7 to 2.5)          | -63.2<br>(-71.6 to -52.8)       | 125<br>(95 to 158)           | 13.8<br>(10.5 to 17.6)                        | -18.5<br>(-37.8 to 3.4)          | -63.3<br>(-71.7 to -52.9)       |
| United States Virgin Islands     | 14<br>(12 to 17)             | 22.5<br>(18.7 to 26.4)                        | 100.7<br>(57.2 to 159.2)         | -7.7<br>(-26.7 to 17.4)         | 11<br>(9 to 13)              | 12.3<br>(9.8 to 14.8)                         | 83.9<br>(42.4 to 132.4)          | -24.3<br>(-41.2 to -5.0)        |
| Central Latin America            | 28,000<br>(23,700 to 33,100) | 27.0<br>(22.9 to 31.6)                        | -12.3<br>(-26.9 to 4.4)          | -47.0<br>(-54.7 to -37.5)       | 23,800<br>(20,000 to 27,800) | 19.6<br>(16.5 to 23.0)                        | -15.8<br>(-30.7 to 0.7)          | -56.3<br>(-63.7 to -48.6)       |
| Colombia                         | 3,940<br>(3,020 to 5,020)    | 16.7<br>(12.7 to 21.3)                        | -4.8<br>(-28.6 to 24.4)          | -49.7<br>(-61.4 to -35.4)       | 3,960<br>(3,020 to 4,950)    | 13.7<br>(10.5 to 17.4)                        | 9.3<br>(-16.5 to 38.8)           | -55.1<br>(-65.8 to -42.9)       |

|                                    | Male                         |                                               |                                  |                                 | Female                      |                                               |                                  |                                 |
|------------------------------------|------------------------------|-----------------------------------------------|----------------------------------|---------------------------------|-----------------------------|-----------------------------------------------|----------------------------------|---------------------------------|
|                                    | 2019                         |                                               | Percent change from 1990 to 2019 |                                 | 2019                        |                                               | Percent change from 1990 to 2019 |                                 |
|                                    | Number of deaths             | Age standardized mortality rate (per 100,000) | Number of deaths                 | Age standardized mortality rate | Number of deaths            | Age standardized mortality rate (per 100,000) | Number of deaths                 | Age standardized mortality rate |
| Costa Rica                         | 392<br>(304 to 492)          | 17.2<br>(13.4 to 21.7)                        | 65.7<br>(28.3 to 113.7)          | -28.0<br>(-44.1 to -7.3)        | 284<br>(214 to 354)         | 9.8<br>(7.4 to 12.2)                          | 44.8<br>(14.3 to 83.9)           | -49.9<br>(-60.9 to -36.6)       |
| El Salvador                        | 1,190<br>(893 to 1,500)      | 44.4<br>(33.3 to 56.0)                        | 23.2<br>(-12.9 to 62.2)          | -8.9<br>(-34.2 to 17.8)         | 1,110<br>(811 to 1,430)     | 29.0<br>(21.2 to 37.6)                        | 18.6<br>(-14.3 to 55.1)          | -31.8<br>(-49.3 to -11.6)       |
| Guatemala                          | 5,250<br>(4,150 to 6,630)    | 111.2<br>(90.3 to 133.9)                      | -9.3<br>(-29.7 to 17.3)          | -48.4<br>(-58.9 to -35.7)       | 4,630<br>(3,690 to 5,730)   | 77.1<br>(62.0 to 94.4)                        | -13.4<br>(-32.5 to 9.9)          | -64.3<br>(-71.5 to -56.1)       |
| Honduras                           | 745<br>(611 to 920)          | 27.2<br>(22.0 to 33.5)                        | -8.1<br>(-32.6 to 25.1)          | -26.4<br>(-43.2 to -4.4)        | 377<br>(272 to 750)         | 13.6<br>(9.7 to 25.7)                         | -47.9<br>(-64.3 to 6.9)          | -55.7<br>(-68.3 to -16.1)       |
| Mexico                             | 12,500<br>(10,600 to 14,700) | 24.6<br>(20.8 to 28.9)                        | -24.3<br>(-38.5 to -8.7)         | -50.5<br>(-58.5 to -41.9)       | 10,000<br>(8,460 to 11,700) | 17.8<br>(15.1 to 20.7)                        | -31.0<br>(-42.7 to -16.5)        | -61.0<br>(-66.8 to -54.3)       |
| Nicaragua                          | 566<br>(471 to 682)          | 29.5<br>(24.5 to 35.4)                        | -47.4<br>(-60.2 to -27.8)        | -44.2<br>(-54.7 to -30.1)       | 445<br>(371 to 545)         | 19.6<br>(16.3 to 24.6)                        | -46.9<br>(-61.0 to -29.0)        | -42.4<br>(-55.6 to -26.7)       |
| Panama                             | 452<br>(348 to 574)          | 23.0<br>(17.7 to 29.2)                        | 112.3<br>(64.0 to 174.3)         | -8.5<br>(-29.5 to 18.2)         | 365<br>(278 to 458)         | 15.9<br>(12.1 to 20.0)                        | 120.4<br>(71.6 to 178.9)         | -14.1<br>(-32.7 to 8.9)         |
| Venezuela (Bolivarian Republic of) | 2,960<br>(2,280 to 3,800)    | 24.6<br>(19.1 to 31.4)                        | 34.9<br>(3.8 to 71.7)            | -32.9<br>(-48.1 to -14.4)       | 2,590<br>(1,960 to 3,370)   | 17.3<br>(12.9 to 22.7)                        | 36.0<br>(1.9 to 77.1)            | -42.9<br>(-57.2 to -26.2)       |

|                                     | Male                                 |                                               |                                   |                                   | Female                               |                                               |                                   |                                   |
|-------------------------------------|--------------------------------------|-----------------------------------------------|-----------------------------------|-----------------------------------|--------------------------------------|-----------------------------------------------|-----------------------------------|-----------------------------------|
|                                     | 2019                                 |                                               | Percent change from 1990 to 2019  |                                   | 2019                                 |                                               | Percent change from 1990 to 2019  |                                   |
|                                     | Number of deaths                     | Age standardized mortality rate (per 100,000) | Number of deaths                  | Age standardized mortality rate   | Number of deaths                     | Age standardized mortality rate (per 100,000) | Number of deaths                  | Age standardized mortality rate   |
| Tropical Latin America              | 44,500<br>(40,400 to 47,400)         | 46.9<br>(42.1 to 50.2)                        | 16.3<br>(1.2 to 28.8)             | -36.5<br>(-42.7 to -31.2)         | 45,600<br>(38,900 to 49,400)         | 35.6<br>(30.6 to 38.5)                        | 49.6<br>(24.2 to 70.2)            | -35.6<br>(-43.7 to -29.1)         |
| Brazil                              | 43,700<br>(39,700 to 46,600)         | 47.3<br>(42.5 to 50.5)                        | 15.8<br>(0.9 to 28.7)             | -37.1<br>(-43.4 to -31.9)         | 44,900<br>(38,400 to 48,600)         | 35.9<br>(30.8 to 38.8)                        | 49.9<br>(24.2 to 71.2)            | -36.1<br>(-44.2 to -29.4)         |
| Paraguay                            | 780<br>(598 to 988)                  | 32.3<br>(24.6 to 40.8)                        | 48.7<br>(9.9 to 94.2)             | -6.6<br>(-28.7 to 21.5)           | 693<br>(509 to 881)                  | 23.0<br>(17.0 to 29.4)                        | 31.0<br>(-2.4 to 70.0)            | -24.7<br>(-43.0 to -3.3)          |
| <b>North Africa and Middle East</b> | <b>58,500<br/>(50,700 to 66,900)</b> | <b>28.4<br/>(24.8 to 32.2)</b>                | <b>-42.0<br/>(-55.5 to -28.8)</b> | <b>-50.4<br/>(-58.2 to -43.3)</b> | <b>49,300<br/>(42,000 to 56,900)</b> | <b>24.3<br/>(20.9 to 28.1)</b>                | <b>-49.1<br/>(-60.0 to -37.2)</b> | <b>-53.9<br/>(-61.6 to -46.3)</b> |
| Afghanistan                         | 9,220<br>(6,750 to 12,200)           | 66.0<br>(53.8 to 80.0)                        | -25.2<br>(-49.7 to 13.1)          | -56.8<br>(-67.3 to -42.9)         | 9,480<br>(6,620 to 12,500)           | 57.5<br>(43.5 to 70.3)                        | -17.0<br>(-44.8 to 19.1)          | -58.1<br>(-71.4 to -43.9)         |
| Algeria                             | 2,940<br>(2,310 to 3,780)            | 22.0<br>(17.2 to 28.5)                        | -30.8<br>(-55.6 to 3.4)           | -57.2<br>(-68.0 to -44.3)         | 2,850<br>(2,210 to 3,690)            | 25.6<br>(19.6 to 34.0)                        | -26.6<br>(-51.2 to 8.5)           | -49.0<br>(-60.8 to -34.4)         |
| Bahrain                             | 48<br>(37 to 60)                     | 22.9<br>(16.6 to 28.4)                        | 122.7<br>(61.7 to 191.4)          | -35.6<br>(-51.5 to -18.2)         | 35<br>(26 to 43)                     | 20.4<br>(14.2 to 25.0)                        | 116.6<br>(61.9 to 183.3)          | -20.9<br>(-40.1 to 2.2)           |
| Egypt                               | 12,000<br>(8,990 to 15,900)          | 33.5<br>(25.4 to 44.9)                        | -56.6<br>(-68.9 to -39.7)         | -60.5<br>(-70.6 to -46.7)         | 9,330<br>(6,870 to 12,500)           | 35.9<br>(26.5 to 53.9)                        | -67.5<br>(-77.1 to -53.7)         | -59.7<br>(-70.8 to -43.4)         |

|                            | Male                      |                                               |                                  |                                 | Female                    |                                               |                                  |                                 |
|----------------------------|---------------------------|-----------------------------------------------|----------------------------------|---------------------------------|---------------------------|-----------------------------------------------|----------------------------------|---------------------------------|
|                            | 2019                      |                                               | Percent change from 1990 to 2019 |                                 | 2019                      |                                               | Percent change from 1990 to 2019 |                                 |
|                            | Number of deaths          | Age standardized mortality rate (per 100,000) | Number of deaths                 | Age standardized mortality rate | Number of deaths          | Age standardized mortality rate (per 100,000) | Number of deaths                 | Age standardized mortality rate |
| Iran (Islamic Republic of) | 5,760<br>(5,160 to 6,240) | 17.8<br>(15.8 to 19.3)                        | -29.3<br>(-46.4 to -12.0)        | -49.8<br>(-57.4 to -42.5)       | 4,450<br>(3,720 to 4,910) | 15.0<br>(12.4 to 16.7)                        | -40.1<br>(-55.5 to -23.6)        | -50.8<br>(-59.8 to -42.7)       |
| Iraq                       | 1,710<br>(1,370 to 2,110) | 14.9<br>(12.2 to 18.5)                        | -62.3<br>(-73.9 to -46.7)        | -65.0<br>(-73.5 to -51.4)       | 1,460<br>(1,170 to 1,830) | 11.0<br>(8.9 to 14.8)                         | -47.5<br>(-65.6 to -24.1)        | -60.3<br>(-71.5 to -44.9)       |
| Jordan                     | 577<br>(473 to 705)       | 19.1<br>(15.4 to 23.4)                        | 43.2<br>(5.3 to 94.3)            | -42.4<br>(-55.8 to -26.3)       | 477<br>(366 to 607)       | 18.0<br>(14.2 to 22.7)                        | 26.3<br>(-11.2 to 77.8)          | -46.4<br>(-59.0 to -29.5)       |
| Kuwait                     | 457<br>(371 to 554)       | 41.7<br>(33.5 to 50.6)                        | 351.7<br>(259.5 to 451.9)        | 41.5<br>(15.7 to 71.3)          | 211<br>(170 to 255)       | 26.7<br>(21.3 to 32.5)                        | 134.1<br>(90.2 to 191.1)         | -10.0<br>(-28.0 to 17.0)        |
| Lebanon                    | 544<br>(424 to 783)       | 24.7<br>(19.2 to 35.7)                        | 59.1<br>(18.4 to 135.8)          | -26.6<br>(-44.6 to 8.9)         | 365<br>(278 to 536)       | 13.1<br>(10.0 to 19.2)                        | 19.7<br>(-14.8 to 69.1)          | -44.7<br>(-58.7 to -19.7)       |
| Libya                      | 455<br>(347 to 574)       | 20.2<br>(15.5 to 25.5)                        | -0.3<br>(-29.3 to 37.8)          | -31.0<br>(-49.4 to -7.2)        | 382<br>(298 to 490)       | 17.0<br>(13.2 to 21.9)                        | -0.4<br>(-30.6 to 45.0)          | -30.4<br>(-49.2 to -4.0)        |
| Morocco                    | 3,390<br>(2,530 to 4,410) | 27.7<br>(20.7 to 36.1)                        | -45.6<br>(-61.5 to -24.4)        | -46.6<br>(-59.2 to -31.3)       | 2,860<br>(2,220 to 3,710) | 22.1<br>(16.9 to 28.6)                        | -53.1<br>(-67.1 to -35.0)        | -53.7<br>(-64.9 to -40.5)       |
| Oman                       | 232<br>(190 to 277)       | 48.1<br>(37.7 to 59.1)                        | 5.9<br>(-19.8 to 42.3)           | -28.6<br>(-45.0 to -0.4)        | 176<br>(135 to 210)       | 35.4<br>(26.2 to 43.6)                        | -20.0<br>(-40.4 to 9.4)          | -31.5<br>(-47.8 to -0.7)        |

|                      | Male                      |                                               |                                  |                                 | Female                    |                                               |                                  |                                 |
|----------------------|---------------------------|-----------------------------------------------|----------------------------------|---------------------------------|---------------------------|-----------------------------------------------|----------------------------------|---------------------------------|
|                      | 2019                      |                                               | Percent change from 1990 to 2019 |                                 | 2019                      |                                               | Percent change from 1990 to 2019 |                                 |
|                      | Number of deaths          | Age standardized mortality rate (per 100,000) | Number of deaths                 | Age standardized mortality rate | Number of deaths          | Age standardized mortality rate (per 100,000) | Number of deaths                 | Age standardized mortality rate |
| Palestine            | 276<br>(237 to 343)       | 33.9<br>(28.5 to 44.0)                        | 6.9<br>(-19.1 to 38.7)           | -27.8<br>(-42.5 to -5.3)        | 224<br>(184 to 322)       | 21.2<br>(17.2 to 31.4)                        | -2.1<br>(-31.9 to 32.6)          | -33.0<br>(-47.7 to 13.5)        |
| Qatar                | 46<br>(34 to 64)          | 21.4<br>(16.5 to 27.9)                        | 246.4<br>(141.2 to 395.4)        | -14.6<br>(-38.0 to 19.5)        | 24<br>(19 to 32)          | 37.0<br>(29.1 to 46.6)                        | 96.3<br>(42.4 to 169.5)          | 27.3<br>(-10.6 to 75.4)         |
| Saudi Arabia         | 2,770<br>(2,170 to 3,470) | 33.6<br>(27.9 to 40.4)                        | 86.5<br>(39.1 to 163.8)          | -25.5<br>(-42.7 to 8.9)         | 1,930<br>(1,430 to 2,460) | 30.3<br>(23.9 to 38.6)                        | 45.4<br>(8.5 to 101.1)           | -28.4<br>(-46.9 to 3.8)         |
| Sudan                | 3,990<br>(2,790 to 5,470) | 32.3<br>(22.6 to 43.6)                        | -57.0<br>(-77.1 to -27.6)        | -56.1<br>(-73.1 to -38.3)       | 3,040<br>(2,150 to 4,050) | 26.2<br>(19.6 to 34.6)                        | -63.8<br>(-79.5 to -35.5)        | -61.3<br>(-75.2 to -43.8)       |
| Syrian Arab Republic | 1,320<br>(981 to 1,700)   | 25.3<br>(19.3 to 32.0)                        | -32.8<br>(-54.7 to 1.8)          | -16.7<br>(-39.8 to 17.7)        | 967<br>(735 to 1,230)     | 23.2<br>(18.3 to 29.4)                        | -40.7<br>(-59.7 to -15.1)        | -13.2<br>(-36.9 to 19.3)        |
| Tunisia              | 1,030<br>(760 to 1,410)   | 21.3<br>(15.7 to 29.0)                        | -11.6<br>(-41.8 to 34.0)         | -41.2<br>(-57.7 to -18.3)       | 804<br>(591 to 1,070)     | 14.3<br>(10.5 to 19.0)                        | -31.8<br>(-56.0 to 0.6)          | -56.2<br>(-69.4 to -40.6)       |
| Turkey               | 8,000<br>(6,250 to 9,730) | 22.8<br>(17.9 to 27.5)                        | -51.2<br>(-66.3 to -31.5)        | -58.9<br>(-69.9 to -45.8)       | 6,860<br>(4,890 to 8,470) | 15.9<br>(11.6 to 19.6)                        | -56.2<br>(-69.9 to -36.6)        | -68.1<br>(-77.2 to -55.8)       |
| United Arab Emirates | 474<br>(357 to 623)       | 53.8<br>(29.5 to 65.9)                        | 341.5<br>(214.3 to 534.4)        | -36.8<br>(-51.8 to -10.6)       | 125<br>(92 to 162)        | 42.5<br>(18.2 to 57.3)                        | 79.7<br>(29.8 to 151.6)          | -48.0<br>(-60.9 to -26.9)       |

|                                               | Male                                          |                                               |                                         |                                         | Female                                        |                                               |                                         |                                         |
|-----------------------------------------------|-----------------------------------------------|-----------------------------------------------|-----------------------------------------|-----------------------------------------|-----------------------------------------------|-----------------------------------------------|-----------------------------------------|-----------------------------------------|
|                                               | 2019                                          |                                               | Percent change from 1990 to 2019        |                                         | 2019                                          |                                               | Percent change from 1990 to 2019        |                                         |
|                                               | Number of deaths                              | Age standardized mortality rate (per 100,000) | Number of deaths                        | Age standardized mortality rate         | Number of deaths                              | Age standardized mortality rate (per 100,000) | Number of deaths                        | Age standardized mortality rate         |
| Yemen                                         | 3,120<br>(2,080 to 4,510)                     | 39.2<br>(25.8 to 58.1)                        | -41.3<br>(-70.1 to 3.9)                 | -43.9<br>(-66.4 to -18.1)               | 3,170<br>(2,210 to 4,280)                     | 33.0<br>(23.9 to 47.3)                        | -51.8<br>(-70.3 to -22.1)               | -54.0<br>(-69.4 to -33.5)               |
| <b>South Asia</b>                             | <b>262,000</b><br><b>(225,000 to 300,000)</b> | <b>41.8</b><br><b>(35.7 to 47.8)</b>          | <b>-44.4</b><br><b>(-53.0 to -32.5)</b> | <b>-51.7</b><br><b>(-58.5 to -43.2)</b> | <b>286,000</b><br><b>(245,000 to 333,000)</b> | <b>43.4</b><br><b>(37.0 to 50.6)</b>          | <b>-35.5</b><br><b>(-48.3 to -21.3)</b> | <b>-48.7</b><br><b>(-58.2 to -38.4)</b> |
| Bangladesh                                    | 18,700<br>(15,200 to 24,000)                  | 31.1<br>(25.5 to 39.9)                        | -68.5<br>(-76.2 to -57.8)               | -67.3<br>(-74.3 to -57.7)               | 18,600<br>(13,800 to 22,500)                  | 32.7<br>(23.3 to 39.7)                        | -65.9<br>(-75.3 to -55.3)               | -61.3<br>(-71.2 to -50.7)               |
| Bhutan                                        | 83<br>(51 to 124)                             | 31.8<br>(19.4 to 47.9)                        | -70.0<br>(-83.2 to -36.1)               | -57.9<br>(-74.3 to -27.9)               | 78<br>(49 to 110)                             | 31.3<br>(19.1 to 43.2)                        | -62.0<br>(-78.7 to -15.3)               | -50.3<br>(-69.3 to -14.1)               |
| India                                         | 202,000<br>(171,000 to 234,000)               | 42.3<br>(35.6 to 49.0)                        | -42.7<br>(-52.6 to -28.9)               | -52.8<br>(-60.2 to -43.1)               | 232,000<br>(193,000 to 274,000)               | 45.1<br>(37.8 to 53.5)                        | -31.6<br>(-46.5 to -13.8)               | -50.9<br>(-61.0 to -39.3)               |
| Nepal                                         | 4,100<br>(3,040 to 5,260)                     | 40.1<br>(28.6 to 52.4)                        | -71.9<br>(-80.3 to -59.9)               | -63.2<br>(-75.7 to -47.0)               | 4,660<br>(3,540 to 5,780)                     | 43.2<br>(31.5 to 54.8)                        | -66.8<br>(-75.5 to -55.6)               | -60.3<br>(-72.4 to -45.9)               |
| Pakistan                                      | 36,800<br>(27,000 to 48,100)                  | 45.4<br>(31.8 to 60.6)                        | -16.4<br>(-37.5 to 14.3)                | -28.7<br>(-45.4 to -8.9)                | 31,400<br>(24,400 to 40,000)                  | 29.0<br>(23.5 to 36.0)                        | -14.9<br>(-39.3 to 18.3)                | -35.7<br>(-51.2 to 16.6)                |
| <b>Southeast Asia, East Asia, and Oceania</b> | <b>236,000</b><br><b>(212,000 to 262,000)</b> | <b>29.4</b><br><b>(26.2 to 32.5)</b>          | <b>-46.4</b><br><b>(-54.3 to -37.5)</b> | <b>-57.1</b><br><b>(-62.0 to -51.2)</b> | <b>197,000</b><br><b>(166,000 to 221,000)</b> | <b>18.4</b><br><b>(15.7 to 20.6)</b>          | <b>-50.8</b><br><b>(-58.3 to -42.0)</b> | <b>-69.0</b><br><b>(-73.1 to -64.5)</b> |



|                                       | Male                           |                                               |                                  |                                 | Female                        |                                               |                                  |                                 |
|---------------------------------------|--------------------------------|-----------------------------------------------|----------------------------------|---------------------------------|-------------------------------|-----------------------------------------------|----------------------------------|---------------------------------|
|                                       | 2019                           |                                               | Percent change from 1990 to 2019 |                                 | 2019                          |                                               | Percent change from 1990 to 2019 |                                 |
|                                       | Number of deaths               | Age standardized mortality rate (per 100,000) | Number of deaths                 | Age standardized mortality rate | Number of deaths              | Age standardized mortality rate (per 100,000) | Number of deaths                 | Age standardized mortality rate |
| East Asia                             | 113,000<br>(97,100 to 133,000) | 21.1<br>(18.4 to 23.8)                        | -60.6<br>(-67.3 to -46.8)        | -67.9<br>(-72.4 to -59.1)       | 92,000<br>(75,800 to 115,000) | 11.4<br>(9.6 to 13.9)                         | -66.4<br>(-72.9 to -54.6)        | -80.8<br>(-84.0 to -74.7)       |
| China                                 | 103,000<br>(86,800 to 122,000) | 19.8<br>(17.0 to 22.5)                        | -63.2<br>(-69.9 to -49.5)        | -70.1<br>(-74.5 to -61.8)       | 82,700<br>(67,800 to 105,000) | 10.8<br>(9.0 to 13.4)                         | -68.8<br>(-75.0 to -57.2)        | -82.0<br>(-85.3 to -76.0)       |
| Democratic People's Republic of Korea | 2,860<br>(2,300 to 3,500)      | 34.5<br>(27.1 to 42.2)                        | -55.0<br>(-69.2 to -36.1)        | -47.8<br>(-61.8 to -31.9)       | 4,140<br>(3,200 to 5,280)     | 25.1<br>(19.5 to 32.0)                        | -39.3<br>(-57.7 to -14.3)        | -57.3<br>(-67.9 to -43.7)       |
| Taiwan (Province of China)            | 7,910<br>(6,360 to 9,880)      | 43.7<br>(34.9 to 54.8)                        | 239.9<br>(174.2 to 319.8)        | 10.0<br>(-11.2 to 36.7)         | 5,160<br>(3,990 to 6,410)     | 22.9<br>(17.9 to 28.5)                        | 247.7<br>(180.7 to 326.2)        | -13.5<br>(-29.0 to 6.2)         |
| Oceania                               | 4,210<br>(3,150 to 5,660)      | 74.2<br>(59.0 to 106.1)                       | 30.8<br>(-1.5 to 74.4)           | -30.9<br>(-44.2 to -13.9)       | 3,560<br>(2,670 to 4,630)     | 65.3<br>(51.6 to 85.9)                        | 42.2<br>(5.1 to 89.7)            | -24.6<br>(-40.4 to -6.5)        |
| American Samoa                        | 6<br>(5 to 7)                  | 31.3<br>(26.0 to 36.8)                        | 13.2<br>(-9.4 to 41.0)           | -28.5<br>(-41.6 to -13.1)       | 6<br>(5 to 7)                 | 26.7<br>(21.2 to 33.2)                        | 31.5<br>(-0.5 to 70.8)           | -22.3<br>(-39.4 to -1.6)        |
| Cook Islands                          | 6<br>(5 to 7)                  | 56.0<br>(45.9 to 68.1)                        | -10.0<br>(-28.6 to 13.0)         | -44.9<br>(-55.7 to -31.3)       | 4<br>(3 to 5)                 | 32.1<br>(25.0 to 39.9)                        | -12.4<br>(-36.1 to 16.0)         | -53.4<br>(-65.6 to -38.5)       |
| Fiji                                  | 120<br>(92 to 153)             | 45.2<br>(36.2 to 55.1)                        | 2.6<br>(-25.7 to 41.7)           | -25.1<br>(-43.2 to -1.3)        | 96<br>(72 to 121)             | 29.1<br>(22.0 to 36.4)                        | 8.7<br>(-23.5 to 48.7)           | -29.7<br>(-49.0 to -4.6)        |

|                                  | Male             |                                               |                                  |                                 | Female           |                                               |                                  |                                 |
|----------------------------------|------------------|-----------------------------------------------|----------------------------------|---------------------------------|------------------|-----------------------------------------------|----------------------------------|---------------------------------|
|                                  | 2019             |                                               | Percent change from 1990 to 2019 |                                 | 2019             |                                               | Percent change from 1990 to 2019 |                                 |
|                                  | Number of deaths | Age standardized mortality rate (per 100,000) | Number of deaths                 | Age standardized mortality rate | Number of deaths | Age standardized mortality rate (per 100,000) | Number of deaths                 | Age standardized mortality rate |
| Guam                             | 18<br>(15 to 22) | 21.7<br>(18.0 to 26.4)                        | 56.8<br>(25.9 to 95.4)           | -36.7<br>(-48.9 to -21.3)       | 16<br>(13 to 20) | 16.8<br>(13.6 to 20.5)                        | 56.7<br>(24.3 to 96.9)           | -51.8<br>(-61.7 to -39.1)       |
| Kiribati                         | 18<br>(15 to 23) | 60.0<br>(48.8 to 73.0)                        | -14.9<br>(-37.9 to 12.1)         | -28.7<br>(-44.5 to -9.8)        | 17<br>(13 to 21) | 49.2<br>(38.5 to 60.5)                        | -14.7<br>(-38.9 to 15.6)         | -27.8<br>(-44.2 to -4.4)        |
| Marshall Islands                 | 11<br>(9 to 15)  | 67.4<br>(53.1 to 86.7)                        | -5.6<br>(-27.7 to 21.6)          | -30.0<br>(-44.6 to -11.2)       | 9<br>(6 to 12)   | 61.0<br>(45.9 to 82.4)                        | -1.2<br>(-27.5 to 33.1)          | -13.2<br>(-35.4 to 13.2)        |
| Micronesia (Federated States of) | 21<br>(15 to 27) | 72.0<br>(56.0 to 90.7)                        | -36.9<br>(-55.2 to -16.8)        | -27.2<br>(-44.4 to -8.3)        | 18<br>(13 to 24) | 59.8<br>(46.0 to 80.1)                        | -35.8<br>(-53.4 to -14.8)        | -27.8<br>(-45.8 to -3.8)        |
| Nauru                            | 2<br>(2 to 3)    | 81.9<br>(64.7 to 103.7)                       | -34.6<br>(-48.3 to -16.1)        | -17.7<br>(-35.3 to 2.4)         | 2<br>(1 to 2)    | 62.3<br>(48.0 to 81.4)                        | -39.0<br>(-53.5 to -19.7)        | -24.3<br>(-40.6 to -2.7)        |
| Niue                             | 0<br>(0 to 1)    | 51.6<br>(42.3 to 64.9)                        | -37.5<br>(-50.5 to -20.9)        | -27.6<br>(-42.6 to -8.4)        | 0<br>(0 to 1)    | 36.9<br>(27.8 to 48.7)                        | -46.4<br>(-59.4 to -26.8)        | -27.6<br>(-45.2 to -1.6)        |
| Northern Mariana Islands         | 7<br>(6 to 8)    | 38.9<br>(33.4 to 45.0)                        | 31.6<br>(4.5 to 65.2)            | -24.5<br>(-38.0 to -9.3)        | 4<br>(3 to 4)    | 21.8<br>(17.1 to 26.7)                        | 27.0<br>(-3.6 to 64.9)           | -39.1<br>(-54.2 to -21.2)       |
| Palau                            | 10<br>(8 to 12)  | 119.2<br>(98.7 to 144.0)                      | 16.1<br>(-12.9 to 54.0)          | -27.8<br>(-44.2 to -8.3)        | 8<br>(6 to 10)   | 116.3<br>(90.9 to 143.6)                      | 4.2<br>(-23.8 to 38.8)           | -27.7<br>(-46.5 to -3.6)        |

|                  | Male                            |                                               |                                  |                                 | Female                         |                                               |                                  |                                 |
|------------------|---------------------------------|-----------------------------------------------|----------------------------------|---------------------------------|--------------------------------|-----------------------------------------------|----------------------------------|---------------------------------|
|                  | 2019                            |                                               | Percent change from 1990 to 2019 |                                 | 2019                           |                                               | Percent change from 1990 to 2019 |                                 |
|                  | Number of deaths                | Age standardized mortality rate (per 100,000) | Number of deaths                 | Age standardized mortality rate | Number of deaths               | Age standardized mortality rate (per 100,000) | Number of deaths                 | Age standardized mortality rate |
| Papua New Guinea | 3,410<br>(2,470 to 4,730)       | 73.7<br>(55.5 to 118.2)                       | 38.7<br>(-0.1 to 92.2)           | -32.5<br>(-48.3 to -11.5)       | 2,900<br>(2,110 to 3,880)      | 68.5<br>(52.4 to 95.2)                        | 51.1<br>(6.7 to 109.2)           | -25.2<br>(-43.2 to -3.7)        |
| Samoa            | 31<br>(25 to 40)                | 48.2<br>(38.9 to 60.3)                        | -12.6<br>(-35.7 to 18.0)         | -37.0<br>(-51.1 to -19.9)       | 32<br>(24 to 43)               | 45.4<br>(34.0 to 61.1)                        | 2.3<br>(-28.2 to 39.2)           | -26.7<br>(-46.8 to 0.3)         |
| Solomon Islands  | 273<br>(221 to 328)             | 161.8<br>(133.3 to 191.6)                     | 2.9<br>(-20.2 to 36.5)           | -40.9<br>(-53.4 to -14.9)       | 206<br>(167 to 252)            | 141.1<br>(111.7 to 166.4)                     | 13.5<br>(-13.6 to 51.5)          | -35.9<br>(-51.0 to -13.8)       |
| Tokelau          | 0<br>(0 to 0)                   | 34.6<br>(27.4 to 43.6)                        | -49.5<br>(-61.6 to -34.4)        | -39.4<br>(-52.3 to -24.2)       | 0<br>(0 to 0)                  | 44.0<br>(33.9 to 57.3)                        | -55.1<br>(-67.2 to -39.6)        | -40.9<br>(-56.8 to -21.0)       |
| Tonga            | 18<br>(15 to 23)                | 54.0<br>(43.4 to 65.2)                        | 5.3<br>(-16.6 to 34.2)           | -17.8<br>(-34.8 to 4.5)         | 16<br>(12 to 20)               | 33.7<br>(25.9 to 43.3)                        | 15.1<br>(-12.4 to 53.2)          | -25.8<br>(-43.0 to -0.6)        |
| Tuvalu           | 2<br>(2 to 3)                   | 57.0<br>(44.7 to 75.8)                        | -49.3<br>(-65.5 to -28.7)        | -51.6<br>(-64.6 to -34.3)       | 2<br>(2 to 3)                  | 50.6<br>(38.3 to 68.2)                        | -54.9<br>(-68.5 to -36.8)        | -54.1<br>(-66.6 to -38.1)       |
| Vanuatu          | 64<br>(49 to 85)                | 68.8<br>(52.3 to 89.8)                        | 62.2<br>(24.0 to 120.6)          | -11.9<br>(-31.1 to 13.8)        | 49<br>(36 to 65)               | 57.2<br>(42.7 to 76.9)                        | 57.8<br>(13.9 to 120.5)          | -17.8<br>(-42.1 to 16.0)        |
| Southeast Asia   | 118,000<br>(101,000 to 134,000) | 54.0<br>(45.4 to 61.0)                        | -20.8<br>(-36.2 to -3.1)         | -32.3<br>(-42.2 to -20.2)       | 101,000<br>(76,900 to 115,000) | 38.0<br>(28.8 to 43.1)                        | -18.5<br>(-38.0 to 0.4)          | -38.5<br>(-53.3 to -26.3)       |

|                                  | Male                         |                                               |                                  |                                 | Female                       |                                               |                                  |                                 |
|----------------------------------|------------------------------|-----------------------------------------------|----------------------------------|---------------------------------|------------------------------|-----------------------------------------------|----------------------------------|---------------------------------|
|                                  | 2019                         |                                               | Percent change from 1990 to 2019 |                                 | 2019                         |                                               | Percent change from 1990 to 2019 |                                 |
|                                  | Number of deaths             | Age standardized mortality rate (per 100,000) | Number of deaths                 | Age standardized mortality rate | Number of deaths             | Age standardized mortality rate (per 100,000) | Number of deaths                 | Age standardized mortality rate |
| Cambodia                         | 6,000<br>(4,980 to 7,070)    | 128.9<br>(107.4 to 150.2)                     | -54.5<br>(-63.9 to -42.3)        | -45.0<br>(-56.0 to -33.5)       | 6,070<br>(4,920 to 7,010)    | 105.0<br>(83.4 to 121.0)                      | -47.9<br>(-58.2 to -34.1)        | -48.3<br>(-57.9 to -36.8)       |
| Indonesia                        | 23,800<br>(20,000 to 27,900) | 33.3<br>(28.1 to 38.5)                        | -53.7<br>(-63.0 to -39.1)        | -51.3<br>(-60.1 to -37.0)       | 20,500<br>(16,000 to 23,700) | 24.6<br>(19.2 to 28.3)                        | -48.9<br>(-61.8 to -34.3)        | -49.6<br>(-60.3 to -36.0)       |
| Lao People's Democratic Republic | 1,830<br>(1,380 to 2,320)    | 84.3<br>(65.5 to 103.5)                       | -66.3<br>(-75.7 to -53.2)        | -60.1<br>(-69.4 to -48.0)       | 1,570<br>(1,150 to 2,000)    | 69.0<br>(51.3 to 87.0)                        | -65.2<br>(-75.0 to -53.2)        | -60.8<br>(-70.6 to -49.2)       |
| Malaysia                         | 12,400<br>(7,880 to 15,600)  | 112.1<br>(72.2 to 140.3)                      | 327.7<br>(111.4 to 461.5)        | 77.1<br>(-15.5 to 133.8)        | 9,350<br>(5,230 to 11,800)   | 89.4<br>(50.9 to 112.6)                       | 302.6<br>(87.0 to 440.6)         | 78.7<br>(-18.0 to 145.1)        |
| Maldives                         | 18<br>(15 to 22)             | 13.1<br>(10.3 to 15.9)                        | -7.2<br>(-38.2 to 33.4)          | -48.3<br>(-61.0 to -32.7)       | 16<br>(13 to 20)             | 14.2<br>(10.7 to 17.4)                        | -24.4<br>(-48.7 to 11.0)         | -59.1<br>(-69.5 to -43.5)       |
| Mauritius                        | 162<br>(133 to 195)          | 26.6<br>(22.0 to 31.9)                        | -11.4<br>(-27.6 to 7.5)          | -61.2<br>(-68.2 to -53.5)       | 127<br>(103 to 153)          | 14.9<br>(12.0 to 17.9)                        | -7.2<br>(-22.9 to 12.4)          | -62.8<br>(-69.1 to -54.8)       |
| Myanmar                          | 11,700<br>(9,460 to 14,500)  | 64.4<br>(53.4 to 77.0)                        | -58.3<br>(-73.6 to -33.5)        | -55.2<br>(-67.1 to -37.3)       | 9,720<br>(7,130 to 12,100)   | 43.2<br>(31.8 to 53.1)                        | -65.4<br>(-77.5 to -43.1)        | -64.8<br>(-75.4 to -48.8)       |
| Philippines                      | 30,400<br>(24,700 to 36,600) | 101.6<br>(80.3 to 124.1)                      | 30.8<br>(2.3 to 62.3)            | 2.4<br>(-20.9 to 24.6)          | 28,000<br>(19,800 to 33,900) | 85.7<br>(56.5 to 104.0)                       | 49.3<br>(5.4 to 90.0)            | -4.7<br>(-41.7 to 18.8)         |

|                            | Male                                          |                                               |                                       |                                         | Female                                        |                                               |                                        |                                         |
|----------------------------|-----------------------------------------------|-----------------------------------------------|---------------------------------------|-----------------------------------------|-----------------------------------------------|-----------------------------------------------|----------------------------------------|-----------------------------------------|
|                            | 2019                                          |                                               | Percent change from 1990 to 2019      |                                         | 2019                                          |                                               | Percent change from 1990 to 2019       |                                         |
|                            | Number of deaths                              | Age standardized mortality rate (per 100,000) | Number of deaths                      | Age standardized mortality rate         | Number of deaths                              | Age standardized mortality rate (per 100,000) | Number of deaths                       | Age standardized mortality rate         |
| Seychelles                 | 44<br>(35 to 52)                              | 108.8<br>(88.0 to 127.4)                      | 55.7<br>(26.8 to 89.6)                | -13.2<br>(-29.3 to 5.1)                 | 34<br>(26 to 40)                              | 63.1<br>(48.5 to 75.0)                        | 59.7<br>(29.5 to 93.8)                 | 5.2<br>(-14.2 to 27.8)                  |
| Sri Lanka                  | 2,610<br>(1,910 to 3,490)                     | 29.1<br>(21.5 to 38.7)                        | -12.7<br>(-37.7 to 20.0)              | -56.1<br>(-68.1 to -38.8)               | 2,090<br>(1,530 to 3,030)                     | 17.9<br>(13.3 to 26.6)                        | -5.9<br>(-33.3 to 52.8)                | -65.0<br>(-74.8 to -42.9)               |
| Thailand                   | 17,200<br>(10,300 to 22,600)                  | 42.1<br>(25.8 to 54.9)                        | 181.9<br>(26.4 to 295.6)              | 18.8<br>(-49.1 to 65.9)                 | 13,900<br>(8,020 to 18,400)                   | 26.1<br>(15.4 to 34.4)                        | 197.9<br>(17.0 to 334.8)               | 2.9<br>(-60.3 to 50.6)                  |
| Timor-Leste                | 321<br>(234 to 410)                           | 80.1<br>(55.2 to 102.8)                       | -56.9<br>(-70.4 to -39.0)             | -40.5<br>(-56.6 to -20.5)               | 280<br>(209 to 351)                           | 70.0<br>(51.9 to 88.0)                        | -57.2<br>(-69.0 to -38.5)              | -48.3<br>(-60.6 to -32.2)               |
| Viet Nam                   | 11,700<br>(9,700 to 14,100)                   | 39.5<br>(33.4 to 47.4)                        | -20.5<br>(-38.6 to 3.0)               | -31.3<br>(-45.7 to -11.2)               | 9,620<br>(7,610 to 12,800)                    | 21.4<br>(17.0 to 28.1)                        | -13.5<br>(-34.2 to 15.1)               | -44.0<br>(-57.1 to -24.7)               |
| <b>Sub-Saharan Africa</b>  | <b>364,000</b><br><b>(306,000 to 436,000)</b> | <b>116.9</b><br><b>(103.1 to 131.6)</b>       | <b>-13.8</b><br><b>(-30.2 to 8.3)</b> | <b>-35.0</b><br><b>(-42.6 to -24.8)</b> | <b>314,000</b><br><b>(263,000 to 373,000)</b> | <b>86.8</b><br><b>(74.2 to 99.4)</b>          | <b>-11.0</b><br><b>(-29.7 to 10.5)</b> | <b>-37.1</b><br><b>(-45.7 to -27.4)</b> |
| Central Sub-Saharan Africa | 34,700<br>(26,500 to 45,700)                  | 132.4<br>(102.5 to 173.4)                     | -25.2<br>(-44.3 to -2.1)              | -36.6<br>(-47.9 to -22.8)               | 31,500<br>(23,800 to 41,100)                  | 91.6<br>(67.7 to 125.9)                       | -20.8<br>(-43.6 to 6.9)                | -37.7<br>(-51.2 to -21.5)               |
| Angola                     | 6,990<br>(5,540 to 8,770)                     | 117.8<br>(98.3 to 141.5)                      | -28.6<br>(-57.5 to 18.6)              | -42.1<br>(-58.2 to -17.7)               | 5,790<br>(4,310 to 7,510)                     | 71.5<br>(56.4 to 90.3)                        | -41.1<br>(-66.7 to 10.7)               | -54.8<br>(-68.7 to -28.8)               |

|                                  | Male                           |                                               |                                  |                                 | Female                        |                                               |                                  |                                 |
|----------------------------------|--------------------------------|-----------------------------------------------|----------------------------------|---------------------------------|-------------------------------|-----------------------------------------------|----------------------------------|---------------------------------|
|                                  | 2019                           |                                               | Percent change from 1990 to 2019 |                                 | 2019                          |                                               | Percent change from 1990 to 2019 |                                 |
|                                  | Number of deaths               | Age standardized mortality rate (per 100,000) | Number of deaths                 | Age standardized mortality rate | Number of deaths              | Age standardized mortality rate (per 100,000) | Number of deaths                 | Age standardized mortality rate |
| Central African Republic         | 3,180<br>(2,130 to 4,380)      | 199.4<br>(145.1 to 263.0)                     | 14.6<br>(-21.2 to 63.2)          | -20.8<br>(-38.5 to 0.2)         | 2,500<br>(1,770 to 3,640)     | 133.6<br>(92.3 to 184.6)                      | 12.9<br>(-26.9 to 69.5)          | -18.8<br>(-40.6 to 9.9)         |
| Congo                            | 1,050<br>(790 to 1,340)        | 98.1<br>(73.5 to 124.0)                       | -5.0<br>(-28.0 to 25.7)          | -40.9<br>(-52.7 to -25.1)       | 984<br>(731 to 1,290)         | 81.6<br>(60.7 to 104.7)                       | 4.7<br>(-26.2 to 41.5)           | -29.9<br>(-47.5 to -8.0)        |
| Democratic Republic of the Congo | 22,800<br>(16,200 to 32,100)   | 136.3<br>(97.3 to 190.6)                      | -28.2<br>(-47.7 to -3.4)         | -35.3<br>(-48.5 to -20.1)       | 21,800<br>(15,300 to 30,300)  | 96.5<br>(67.1 to 141.8)                       | -16.6<br>(-42.8 to 14.6)         | -34.3<br>(-50.2 to -15.3)       |
| Equatorial Guinea                | 191<br>(136 to 262)            | 96.9<br>(74.5 to 122.6)                       | -54.3<br>(-71.6 to -23.3)        | -54.0<br>(-69.0 to -34.5)       | 172<br>(118 to 249)           | 67.1<br>(47.7 to 92.0)                        | -50.4<br>(-72.6 to -10.5)        | -52.0<br>(-69.7 to -22.8)       |
| Gabon                            | 418<br>(310 to 532)            | 107.4<br>(80.6 to 135.9)                      | -12.0<br>(-33.3 to 15.9)         | -30.5<br>(-44.5 to -13.7)       | 279<br>(199 to 371)           | 55.2<br>(38.8 to 73.3)                        | -22.3<br>(-44.0 to 6.6)          | -39.1<br>(-54.9 to -19.2)       |
| Eastern Sub-Saharan Africa       | 113,000<br>(96,000 to 134,000) | 111.8<br>(99.3 to 125.2)                      | -35.4<br>(-48.2 to -16.9)        | -43.8<br>(-51.6 to -33.6)       | 97,400<br>(81,800 to 116,000) | 82.6<br>(70.3 to 93.7)                        | -29.5<br>(-46.3 to 13.1)         | -44.0<br>(-52.1 to -34.5)       |
| Burundi                          | 3,340<br>(2,380 to 4,700)      | 120.9<br>(92.5 to 153.8)                      | -26.7<br>(-48.5 to 10.3)         | -41.1<br>(-55.0 to -21.0)       | 3,120<br>(2,120 to 4,310)     | 99.6<br>(69.7 to 138.1)                       | -22.4<br>(-49.4 to 14.0)         | -35.3<br>(-53.8 to -12.2)       |
| Comoros                          | 208<br>(159 to 268)            | 95.6<br>(74.1 to 121.4)                       | -41.1<br>(-57.7 to -1.7)         | -40.1<br>(-54.9 to -10.5)       | 242<br>(177 to 303)           | 89.5<br>(65.3 to 112.8)                       | -29.5<br>(-48.6 to 17.1)         | -37.1<br>(-51.6 to -6.5)        |

|            | Male                         |                                               |                                  |                                 | Female                       |                                               |                                  |                                 |
|------------|------------------------------|-----------------------------------------------|----------------------------------|---------------------------------|------------------------------|-----------------------------------------------|----------------------------------|---------------------------------|
|            | 2019                         |                                               | Percent change from 1990 to 2019 |                                 | 2019                         |                                               | Percent change from 1990 to 2019 |                                 |
|            | Number of deaths             | Age standardized mortality rate (per 100,000) | Number of deaths                 | Age standardized mortality rate | Number of deaths             | Age standardized mortality rate (per 100,000) | Number of deaths                 | Age standardized mortality rate |
| Djibouti   | 347<br>(256 to 476)          | 108.4<br>(84.8 to 142.0)                      | 35.7<br>(-9.5 to 107.7)          | -23.8<br>(-40.7 to -0.5)        | 246<br>(178 to 333)          | 78.8<br>(60.2 to 103.5)                       | 16.7<br>(-25.7 to 81.2)          | -28.4<br>(-47.8 to -1.9)        |
| Eritrea    | 2,440<br>(1,440 to 3,940)    | 189.4<br>(107.0 to 313.1)                     | -20.7<br>(-55.3 to 26.8)         | -29.5<br>(-51.0 to 5.9)         | 1,990<br>(1,290 to 3,270)    | 123.4<br>(78.8 to 213.6)                      | -9.2<br>(-50.6 to 63.6)          | -25.9<br>(-53.9 to 20.7)        |
| Ethiopia   | 26,100<br>(21,900 to 31,800) | 100.7<br>(84.1 to 121.4)                      | -58.3<br>(-68.6 to -40.5)        | -61.8<br>(-71.2 to -46.2)       | 20,200<br>(16,500 to 24,400) | 71.8<br>(60.2 to 83.0)                        | -55.9<br>(-69.8 to -40.4)        | -60.7<br>(-70.0 to -47.0)       |
| Kenya      | 11,600<br>(9,410 to 14,000)  | 115.9<br>(94.6 to 141.2)                      | -4.7<br>(-25.2 to 20.3)          | -15.7<br>(-28.5 to -1.5)        | 9,930<br>(7,890 to 12,600)   | 81.0<br>(62.4 to 104.5)                       | -1.0<br>(-26.0 to 28.8)          | -25.8<br>(-40.4 to -11.8)       |
| Madagascar | 6,840<br>(5,210 to 8,940)    | 104.2<br>(83.4 to 130.7)                      | -29.5<br>(-47.6 to -7.4)         | -37.1<br>(-50.6 to -20.2)       | 6,830<br>(5,140 to 8,710)    | 94.8<br>(70.4 to 121.0)                       | -17.8<br>(-40.8 to 8.9)          | -30.4<br>(-47.9 to -10.4)       |
| Malawi     | 5,040<br>(4,040 to 6,260)    | 123.5<br>(104.3 to 143.7)                     | -33.8<br>(-50.6 to -10.3)        | -32.2<br>(-46.1 to -14.3)       | 4,170<br>(3,290 to 5,180)    | 76.2<br>(62.1 to 91.4)                        | -41.1<br>(-57.1 to 17.9)         | -47.9<br>(-59.7 to -32.2)       |
| Mozambique | 8,280<br>(6,430 to 10,500)   | 131.4<br>(108.3 to 159.4)                     | -25.7<br>(-51.0 to 23.1)         | -23.4<br>(-40.7 to 3.0)         | 7,240<br>(5,230 to 9,540)    | 79.2<br>(58.8 to 101.2)                       | -25.8<br>(-57.6 to 27.2)         | -40.7<br>(-58.8 to -14.4)       |
| Rwanda     | 2,820<br>(2,150 to 3,700)    | 101.2<br>(78.0 to 126.3)                      | -59.5<br>(-71.8 to -35.2)        | -52.9<br>(-64.7 to -36.9)       | 2,820<br>(2,120 to 3,580)    | 76.3<br>(56.1 to 95.7)                        | -47.7<br>(-65.5 to 25.6)         | -50.8<br>(-61.7 to -35.3)       |

|                             | Male                         |                                               |                                  |                                 | Female                       |                                               |                                  |                                 |
|-----------------------------|------------------------------|-----------------------------------------------|----------------------------------|---------------------------------|------------------------------|-----------------------------------------------|----------------------------------|---------------------------------|
|                             | 2019                         |                                               | Percent change from 1990 to 2019 |                                 | 2019                         |                                               | Percent change from 1990 to 2019 |                                 |
|                             | Number of deaths             | Age standardized mortality rate (per 100,000) | Number of deaths                 | Age standardized mortality rate | Number of deaths             | Age standardized mortality rate (per 100,000) | Number of deaths                 | Age standardized mortality rate |
| Somalia                     | 11,600<br>(7,930 to 16,400)  | 173.1<br>(132.4 to 221.4)                     | 36.6<br>(-7.3 to 108.6)          | -29.1<br>(-45.1 to -7.0)        | 9,130<br>(6,350 to 13,000)   | 125.1<br>(90.2 to 172.4)                      | 57.9<br>(9.8 to 128.3)           | -25.8<br>(-45.4 to 0.7)         |
| South Sudan                 | 4,490<br>(3,290 to 5,970)    | 120.5<br>(94.9 to 150.6)                      | -28.8<br>(-49.9 to -1.7)         | -37.8<br>(-52.2 to -21.6)       | 3,230<br>(2,290 to 4,640)    | 90.0<br>(69.4 to 115.8)                       | -28.7<br>(-52.1 to 4.0)          | -39.0<br>(-52.5 to -21.3)       |
| Uganda                      | 8,620<br>(6,670 to 11,000)   | 104.6<br>(84.5 to 126.3)                      | -12.0<br>(-38.6 to 27.8)         | -23.0<br>(-39.1 to -2.9)        | 7,870<br>(5,990 to 10,200)   | 75.1<br>(57.2 to 94.1)                        | 14.3<br>(-26.2 to 72.0)          | -18.6<br>(-40.5 to 12.2)        |
| United Republic of Tanzania | 16,400<br>(12,800 to 20,800) | 101.0<br>(83.4 to 120.3)                      | -31.2<br>(-49.6 to -6.8)         | -47.4<br>(-58.3 to -34.8)       | 16,600<br>(12,900 to 21,100) | 85.3<br>(69.4 to 103.1)                       | -21.7<br>(-41.4 to 8.3)          | -45.0<br>(-56.7 to -30.9)       |
| Zambia                      | 4,490<br>(3,540 to 5,620)    | 110.4<br>(91.2 to 134.0)                      | -40.1<br>(-56.8 to -13.4)        | -42.6<br>(-54.3 to -26.7)       | 3,700<br>(2,940 to 4,640)    | 76.9<br>(61.8 to 95.8)                        | -43.9<br>(-60.4 to -20.8)        | -51.0<br>(-63.0 to -36.2)       |
| Southern Sub-Saharan Africa | 26,300<br>(23,500 to 29,500) | 109.3<br>(98.7 to 119.9)                      | 19.1<br>(3.9 to 37.9)            | -12.0<br>(-21.8 to -1.7)        | 21,200<br>(18,000 to 24,100) | 68.3<br>(58.2 to 76.8)                        | 11.8<br>(-2.9 to 28.3)           | -21.0<br>(-30.2 to -10.6)       |
| Botswana                    | 859<br>(645 to 1,140)        | 144.1<br>(113.2 to 182.6)                     | 70.8<br>(25.4 to 129.4)          | -14.3<br>(-36.2 to 13.6)        | 669<br>(455 to 958)          | 89.0<br>(62.1 to 126.8)                       | 83.4<br>(31.7 to 151.9)          | -7.9<br>(-33.8 to 28.6)         |
| Eswatini                    | 431<br>(317 to 571)          | 145.8<br>(113.1 to 187.8)                     | 8.0<br>(-21.8 to 47.6)           | -5.2<br>(-23.7 to 20.7)         | 290<br>(197 to 396)          | 78.3<br>(53.6 to 106.0)                       | -0.3<br>(-31.9 to 42.6)          | -18.2<br>(-43.4 to 14.7)        |



|                            | Male                            |                                               |                                  |                                 | Female                          |                                               |                                  |                                 |
|----------------------------|---------------------------------|-----------------------------------------------|----------------------------------|---------------------------------|---------------------------------|-----------------------------------------------|----------------------------------|---------------------------------|
|                            | 2019                            |                                               | Percent change from 1990 to 2019 |                                 | 2019                            |                                               | Percent change from 1990 to 2019 |                                 |
|                            | Number of deaths                | Age standardized mortality rate (per 100,000) | Number of deaths                 | Age standardized mortality rate | Number of deaths                | Age standardized mortality rate (per 100,000) | Number of deaths                 | Age standardized mortality rate |
| Lesotho                    | 1,120<br>(887 to 1,370)         | 187.8<br>(153.5 to 225.7)                     | 16.3<br>(-9.4 to 49.2)           | 15.0<br>(-6.6 to 43.2)          | 820<br>(605 to 1,070)           | 110.3<br>(81.5 to 142.3)                      | 6.2<br>(-23.7 to 46.1)           | 15.6<br>(-16.5 to 59.1)         |
| Namibia                    | 865<br>(636 to 1,180)           | 143.3<br>(107.8 to 191.7)                     | 23.0<br>(-8.4 to 71.4)           | -16.5<br>(-34.3 to 7.7)         | 596<br>(421 to 841)             | 71.2<br>(50.9 to 99.4)                        | 15.9<br>(-19.1 to 66.6)          | -31.6<br>(-50.8 to -5.2)        |
| South Africa               | 15,700<br>(14,200 to 17,300)    | 88.9<br>(80.5 to 97.1)                        | 6.7<br>(-7.9 to 22.6)            | -20.4<br>(-30.2 to -11.1)       | 13,300<br>(11,600 to 15,000)    | 56.4<br>(49.3 to 63.3)                        | -1.8<br>(-14.8 to 13.1)          | -32.2<br>(-39.6 to -23.7)       |
| Zimbabwe                   | 7,310<br>(5,870 to 8,860)       | 196.7<br>(158.1 to 232.0)                     | 53.0<br>(17.8 to 100.4)          | 17.0<br>(-5.9 to 44.7)          | 5,590<br>(4,130 to 7,130)       | 122.7<br>(80.4 to 161.1)                      | 57.8<br>(17.6 to 113.5)          | 10.0<br>(-16.4 to 45.3)         |
| Western Sub-Saharan Africa | 190,000<br>(155,000 to 233,000) | 119.9<br>(101.7 to 140.4)                     | 6.2<br>(-16.2 to 40.2)           | -30.3<br>(-40.8 to -16.1)       | 164,000<br>(134,000 to 200,000) | 94.1<br>(78.9 to 111.4)                       | 5.3<br>(-19.0 to 35.4)           | -33.9<br>(-45.7 to -20.3)       |
| Benin                      | 4,810<br>(3,420 to 6,700)       | 131.7<br>(100.7 to 167.1)                     | 2.8<br>(-29.6 to 48.4)           | -33.4<br>(-48.2 to -15.2)       | 4,240<br>(2,960 to 5,810)       | 95.8<br>(73.1 to 123.6)                       | 4.7<br>(-28.7 to 51.3)           | -37.3<br>(-52.9 to -19.0)       |
| Burkina Faso               | 12,600<br>(9,060 to 17,200)     | 163.2<br>(133.0 to 199.8)                     | 31.1<br>(-6.9 to 90.0)           | -25.8<br>(-40.8 to -6.5)        | 11,700<br>(8,730 to 15,600)     | 119.2<br>(96.4 to 145.3)                      | 29.8<br>(-9.8 to 88.1)           | -30.2<br>(-46.8 to -8.9)        |
| Cabo Verde                 | 168<br>(145 to 192)             | 98.9<br>(84.6 to 112.1)                       | 74.8<br>(37.9 to 120.7)          | 40.8<br>(13.5 to 72.8)          | 126<br>(104 to 156)             | 48.5<br>(40.0 to 60.3)                        | 23.0<br>(-2.9 to 62.3)           | -15.0<br>(-31.7 to 9.6)         |

|               | Male                        |                                               |                                  |                                 | Female                     |                                               |                                  |                                 |
|---------------|-----------------------------|-----------------------------------------------|----------------------------------|---------------------------------|----------------------------|-----------------------------------------------|----------------------------------|---------------------------------|
|               | 2019                        |                                               | Percent change from 1990 to 2019 |                                 | 2019                       |                                               | Percent change from 1990 to 2019 |                                 |
|               | Number of deaths            | Age standardized mortality rate (per 100,000) | Number of deaths                 | Age standardized mortality rate | Number of deaths           | Age standardized mortality rate (per 100,000) | Number of deaths                 | Age standardized mortality rate |
| Cameroon      | 9,230<br>(6,640 to 12,200)  | 129.3<br>(94.8 to 168.5)                      | 62.0<br>(15.5 to 127.3)          | -13.7<br>(-32.9 to 12.2)        | 7,790<br>(5,620 to 11,200) | 91.1<br>(67.2 to 122.8)                       | 46.6<br>(-0.8 to 114.9)          | -26.9<br>(-45.8 to 1.5)         |
| Chad          | 11,000<br>(8,070 to 14,400) | 165.5<br>(135.0 to 200.6)                     | 60.1<br>(14.1 to 125.2)          | -20.9<br>(-40.9 to 3.1)         | 8,480<br>(6,090 to 11,600) | 129.4<br>(101.2 to 159.9)                     | 46.5<br>(1.3 to 109.6)           | -22.8<br>(-41.5 to 1.3)         |
| Côte d'Ivoire | 9,650<br>(7,210 to 12,500)  | 135.4<br>(104.1 to 168.9)                     | 3.8<br>(-24.5 to 41.7)           | -30.8<br>(-45.2 to -13.8)       | 7,330<br>(5,170 to 9,570)  | 93.2<br>(70.3 to 116.7)                       | -5.2<br>(-33.7 to 33.7)          | -33.5<br>(-49.0 to 14.0)        |
| Gambia        | 678<br>(526 to 840)         | 141.8<br>(108.7 to 176.4)                     | 2.7<br>(-25.1 to 39.3)           | -21.0<br>(-41.4 to 3.3)         | 546<br>(420 to 681)        | 98.4<br>(75.2 to 123.3)                       | 13.6<br>(-20.3 to 60.5)          | -18.5<br>(-40.0 to 10.5)        |
| Ghana         | 10,700<br>(8,580 to 12,800) | 155.0<br>(126.9 to 185.5)                     | 60.3<br>(16.6 to 115.4)          | -5.9<br>(-28.5 to 22.8)         | 5,620<br>(4,480 to 7,030)  | 60.7<br>(49.5 to 73.9)                        | -0.3<br>(-29.7 to 39.0)          | -42.6<br>(-57.6 to 22.1)        |
| Guinea        | 7,390<br>(5,530 to 9,820)   | 171.9<br>(133.0 to 217.4)                     | -15.9<br>(-40.5 to 19.4)         | -22.8<br>(-40.5 to 3.3)         | 6,160<br>(4,450 to 8,230)  | 134.8<br>(100.1 to 173.7)                     | -24.7<br>(-48.5 to 6.7)          | -37.1<br>(-53.1 to 16.8)        |
| Guinea-Bissau | 612<br>(475 to 779)         | 172.8<br>(136.9 to 209.4)                     | -36.8<br>(-55.7 to -9.0)         | -33.8<br>(-49.3 to -13.0)       | 509<br>(392 to 648)        | 112.9<br>(84.5 to 143.5)                      | -25.9<br>(-49.6 to 6.5)          | -31.6<br>(-50.4 to 5.4)         |
| Liberia       | 1,010<br>(768 to 1,320)     | 91.5<br>(70.7 to 116.3)                       | -56.0<br>(-68.4 to -38.3)        | -55.2<br>(-65.4 to -41.2)       | 927<br>(658 to 1,220)      | 81.2<br>(58.2 to 103.3)                       | -52.9<br>(-67.2 to 34.2)         | -55.3<br>(-67.8 to 41.5)        |

|                       | Male                          |                                               |                                  |                                 | Female                        |                                               |                                  |                                 |
|-----------------------|-------------------------------|-----------------------------------------------|----------------------------------|---------------------------------|-------------------------------|-----------------------------------------------|----------------------------------|---------------------------------|
|                       | 2019                          |                                               | Percent change from 1990 to 2019 |                                 | 2019                          |                                               | Percent change from 1990 to 2019 |                                 |
|                       | Number of deaths              | Age standardized mortality rate (per 100,000) | Number of deaths                 | Age standardized mortality rate | Number of deaths              | Age standardized mortality rate (per 100,000) | Number of deaths                 | Age standardized mortality rate |
| Mali                  | 6,960<br>(4,840 to 9,810)     | 69.2<br>(49.4 to 94.0)                        | 30.6<br>(-14.6 to 95.3)          | -34.7<br>(-53.6 to -9.6)        | 8,220<br>(5,880 to 10,900)    | 73.3<br>(53.5 to 94.3)                        | 60.0<br>(10.8 to 135.8)          | -27.5<br>(-46.9 to -3.3)        |
| Mauritania            | 935<br>(683 to 1,270)         | 86.3<br>(66.6 to 110.7)                       | -19.8<br>(-42.2 to 11.6)         | -44.8<br>(-57.3 to -28.7)       | 862<br>(630 to 1,150)         | 79.3<br>(59.4 to 100.2)                       | -21.3<br>(-45.4 to 8.3)          | -39.0<br>(-54.6 to -19.3)       |
| Niger                 | 12,200<br>(8,620 to 16,800)   | 138.6<br>(105.3 to 177.9)                     | -10.3<br>(-44.0 to 44.9)         | -46.7<br>(-61.3 to -23.7)       | 11,400<br>(8,110 to 15,500)   | 119.4<br>(92.0 to 152.3)                      | -7.1<br>(-45.0 to 48.4)          | -48.1<br>(-62.6 to -29.0)       |
| Nigeria               | 92,100<br>(73,300 to 117,000) | 103.9<br>(83.6 to 129.5)                      | 0.4<br>(-26.4 to 43.6)           | -36.2<br>(-50.6 to -14.1)       | 80,900<br>(64,900 to 100,000) | 91.5<br>(74.1 to 111.9)                       | 4.1<br>(-26.1 to 49.1)           | -34.2<br>(-51.1 to -9.9)        |
| Sao Tome and Principe | 57<br>(45 to 70)              | 121.9<br>(96.8 to 148.6)                      | -24.1<br>(-44.9 to 4.1)          | -24.2<br>(-41.4 to -1.6)        | 52<br>(38 to 67)              | 101.8<br>(75.7 to 133.3)                      | -27.9<br>(-48.9 to 1.8)          | -26.2<br>(-45.2 to -1.7)        |
| Senegal               | 3,570<br>(2,690 to 4,560)     | 84.9<br>(66.6 to 108.1)                       | -22.3<br>(-43.6 to 7.8)          | -37.4<br>(-51.9 to -19.3)       | 3,220<br>(2,410 to 4,050)     | 71.5<br>(55.3 to 89.5)                        | -18.6<br>(-42.1 to 14.7)         | -36.8<br>(-52.3 to -17.4)       |
| Sierra Leone          | 4,040<br>(2,900 to 5,490)     | 147.6<br>(112.4 to 190.0)                     | -16.1<br>(-42.3 to 21.2)         | -39.1<br>(-54.2 to -19.4)       | 3,420<br>(2,380 to 4,760)     | 118.6<br>(88.3 to 153.9)                      | -17.7<br>(-45.0 to 22.1)         | -37.7<br>(-54.3 to -16.5)       |
| Togo                  | 2,320<br>(1,810 to 3,030)     | 142.3<br>(114.6 to 173.9)                     | 16.8<br>(-15.0 to 56.4)          | -13.6<br>(-30.9 to 7.5)         | 2,030<br>(1,530 to 2,650)     | 92.3<br>(69.9 to 117.8)                       | 6.9<br>(-23.9 to 51.5)           | -31.6<br>(-46.7 to -12.0)       |



Appendix Table 4. Lower respiratory infection deaths and age standardized mortality rates attributable to all risk factors combined in 2019 and the percent change in attributable deaths and age standardized mortality rates between 1990 and 2019 for 21 GBD regions and 204 countries and territories (95% UI)

|                                                         | Male                                          |                                           |                                         |                                         | Female                                        |                                           |                                         |                                         |
|---------------------------------------------------------|-----------------------------------------------|-------------------------------------------|-----------------------------------------|-----------------------------------------|-----------------------------------------------|-------------------------------------------|-----------------------------------------|-----------------------------------------|
|                                                         | 2019                                          |                                           | Percent change from 1990 to 2019        |                                         | 2019                                          |                                           | Percent change from 1990 to 2019        |                                         |
|                                                         | Number of attributable deaths                 | Attributable mortality rate (per 100,000) | Number of attributable deaths           | Attributable mortality rate             | Number of attributable deaths                 | Attributable mortality rate (per 100,000) | Number of attributable deaths           | Attributable mortality rate             |
| <b>Global</b>                                           | <b>876,000</b><br><b>(770,000 to 987,000)</b> | <b>26.2</b><br><b>(23.1 to 29.5)</b>      | <b>-41.4</b><br><b>(-49.3 to -32.0)</b> | <b>-56.1</b><br><b>(-60.9 to -50.0)</b> | <b>725,000</b><br><b>(629,000 to 826,000)</b> | <b>19.4</b><br><b>(16.8 to 22.2)</b>      | <b>-44.5</b><br><b>(-53.9 to -34.9)</b> | <b>-59.1</b><br><b>(-65.6 to -52.5)</b> |
| <b>Central Europe, Eastern Europe, and Central Asia</b> | <b>40,400</b><br><b>(34,900 to 45,500)</b>    | <b>19.4</b><br><b>(16.8 to 21.8)</b>      | <b>-23.3</b><br><b>(-32.7 to -13.5)</b> | <b>-38.6</b><br><b>(-46.1 to -30.9)</b> | <b>19,700</b><br><b>(16,500 to 23,000)</b>    | <b>8.4</b><br><b>(7.1 to 9.8)</b>         | <b>-47.5</b><br><b>(-54.4 to -39.9)</b> | <b>-58.6</b><br><b>(-64.3 to -51.6)</b> |
| Central Asia                                            | 10,200<br>(8,560 to 12,200)                   | 26.3<br>(22.5 to 30.8)                    | -61.1<br>(-67.9 to -52.9)               | -57.2<br>(-63.8 to -49.4)               | 6,960<br>(5,730 to 8,500)                     | 16.5<br>(13.7 to 20.1)                    | -66.9<br>(-72.8 to -59.4)               | -65.4<br>(-71.1 to -57.9)               |
| Armenia                                                 | 197<br>(163 to 234)                           | 14.2<br>(11.8 to 16.8)                    | -60.5<br>(-68.1 to -51.5)               | -51.9<br>(-60.7 to -41.8)               | 134<br>(105 to 167)                           | 8.0<br>(6.4 to 9.9)                       | -69.6<br>(-76.7 to -61.0)               | -68.6<br>(-75.3 to -59.6)               |
| Azerbaijan                                              | 981<br>(743 to 1,260)                         | 27.6<br>(21.4 to 34.6)                    | -75.1<br>(-81.3 to -66.9)               | -69.2<br>(-76.6 to -60.0)               | 776<br>(582 to 1,020)                         | 23.2<br>(17.3 to 30.4)                    | -77.4<br>(-83.3 to -69.6)               | -70.8<br>(-78.5 to -60.9)               |
| Georgia                                                 | 270<br>(222 to 325)                           | 12.7<br>(10.6 to 15.1)                    | -68.4<br>(-73.8 to -62.3)               | -68.2<br>(-73.4 to -62.2)               | 166<br>(128 to 207)                           | 5.0<br>(3.9 to 6.1)                       | -72.5<br>(-77.9 to -66.3)               | -81.5<br>(-85.0 to -77.6)               |
| Kazakhstan                                              | 1,610<br>(1,350 to 1,910)                     | 22.0<br>(18.4 to 26.0)                    | -44.4<br>(-53.2 to -33.1)               | -41.4<br>(-50.2 to -30.3)               | 752<br>(614 to 898)                           | 8.4<br>(6.8 to 10.0)                      | -64.6<br>(-70.7 to -57.3)               | -66.7<br>(-72.3 to -60.0)               |
| Kyrgyzstan                                              | 325<br>(268 to 379)                           | 12.0<br>(10.1 to 14.0)                    | -78.2<br>(-82.0 to -74.0)               | -78.1<br>(-81.5 to -74.4)               | 224<br>(179 to 265)                           | 7.3<br>(5.8 to 8.6)                       | -81.5<br>(-85.2 to -77.2)               | -82.6<br>(-85.9 to -78.8)               |

|                        | Male                          |                                           |                                  |                             | Female                        |                                           |                                  |                             |
|------------------------|-------------------------------|-------------------------------------------|----------------------------------|-----------------------------|-------------------------------|-------------------------------------------|----------------------------------|-----------------------------|
|                        | 2019                          |                                           | Percent change from 1990 to 2019 |                             | 2019                          |                                           | Percent change from 1990 to 2019 |                             |
|                        | Number of attributable deaths | Attributable mortality rate (per 100,000) | Number of attributable deaths    | Attributable mortality rate | Number of attributable deaths | Attributable mortality rate (per 100,000) | Number of attributable deaths    | Attributable mortality rate |
| Mongolia               | 219<br>(160 to 289)           | 16.3<br>(12.7 to 20.8)                    | -85.1<br>(-89.5 to -77.2)        | -84.3<br>(-88.4 to -77.2)   | 171<br>(126 to 231)           | 10.6<br>(8.0 to 14.1)                     | -85.5<br>(-89.8 to -79.2)        | -86.4<br>(-90.1 to -80.6)   |
| Tajikistan             | 1,510<br>(1,110 to 2,030)     | 38.5<br>(30.4 to 49.9)                    | -61.4<br>(-72.2 to -46.4)        | -60.7<br>(-69.9 to -47.8)   | 1,030<br>(757 to 1,430)       | 25.3<br>(19.3 to 34.1)                    | -68.7<br>(-78.0 to -55.0)        | -68.7<br>(-77.0 to -56.5)   |
| Turkmenistan           | 569<br>(429 to 747)           | 22.8<br>(17.7 to 29.5)                    | -75.7<br>(-82.8 to -66.0)        | -73.1<br>(-80.3 to -63.4)   | 387<br>(308 to 488)           | 15.1<br>(12.0 to 19.1)                    | -78.4<br>(-83.2 to -71.4)        | -76.2<br>(-81.4 to -68.7)   |
| Uzbekistan             | 4,470<br>(3,640 to 5,530)     | 31.5<br>(26.1 to 37.9)                    | -48.7<br>(-59.7 to -35.5)        | -44.2<br>(-55.1 to -32.2)   | 3,320<br>(2,700 to 4,090)     | 22.6<br>(18.6 to 27.4)                    | -52.4<br>(-61.8 to -39.6)        | -49.5<br>(-58.9 to -37.3)   |
| Central Europe         | 10,600<br>(8,930 to 12,200)   | 13.5<br>(11.5 to 15.6)                    | -21.0<br>(-31.9 to -10.0)        | -48.8<br>(-56.0 to -41.8)   | 6,370<br>(5,200 to 7,640)     | 5.6<br>(4.6 to 6.6)                       | -31.6<br>(-41.1 to -20.3)        | -64.3<br>(-69.3 to -58.4)   |
| Albania                | 173<br>(130 to 225)           | 11.7<br>(9.1 to 14.8)                     | -81.6<br>(-86.7 to -69.9)        | -83.6<br>(-87.5 to -68.8)   | 107<br>(80 to 140)            | 6.9<br>(5.3 to 9.1)                       | -87.0<br>(-90.6 to -80.7)        | -86.2<br>(-89.8 to -79.5)   |
| Bosnia and Herzegovina | 150<br>(114 to 195)           | 6.9<br>(5.4 to 8.9)                       | -15.6<br>(-36.1 to 11.4)         | -46.2<br>(-58.4 to -26.7)   | 112<br>(82 to 172)            | 3.7<br>(2.8 to 5.6)                       | -30.9<br>(-49.0 to 12.8)         | -59.0<br>(-69.0 to -34.9)   |
| Bulgaria               | 772<br>(605 to 970)           | 15.4<br>(12.1 to 19.2)                    | -57.3<br>(-66.3 to -46.8)        | -63.5<br>(-71.1 to -54.9)   | 401<br>(308 to 513)           | 6.4<br>(5.0 to 8.1)                       | -61.1<br>(-69.4 to -51.7)        | -72.3<br>(-78.2 to -65.2)   |

|                 | Male                          |                                           |                                  |                             | Female                        |                                           |                                  |                             |
|-----------------|-------------------------------|-------------------------------------------|----------------------------------|-----------------------------|-------------------------------|-------------------------------------------|----------------------------------|-----------------------------|
|                 | 2019                          |                                           | Percent change from 1990 to 2019 |                             | 2019                          |                                           | Percent change from 1990 to 2019 |                             |
|                 | Number of attributable deaths | Attributable mortality rate (per 100,000) | Number of attributable deaths    | Attributable mortality rate | Number of attributable deaths | Attributable mortality rate (per 100,000) | Number of attributable deaths    | Attributable mortality rate |
| Croatia         | 192<br>(151 to 241)           | 5.9<br>(4.6 to 7.3)                       | -42.0<br>(-54.2 to -27.4)        | -63.9<br>(-71.2 to -55.5)   | 128<br>(97 to 162)            | 2.3<br>(1.7 to 2.9)                       | -48.7<br>(-60.0 to -36.9)        | -70.5<br>(-76.7 to -63.7)   |
| Czechia         | 1,090<br>(866 to 1,330)       | 13.3<br>(10.7 to 16.2)                    | 40.1<br>(14.3 to 69.5)           | -21.5<br>(-35.5 to -5.6)    | 734<br>(560 to 925)           | 5.6<br>(4.3 to 7.0)                       | 13.6<br>(-8.3 to 38.4)           | -34.2<br>(-46.6 to -19.7)   |
| Hungary         | 374<br>(300 to 460)           | 5.6<br>(4.5 to 6.9)                       | -28.3<br>(-40.9 to -13.2)        | -50.6<br>(-59.2 to -40.2)   | 287<br>(218 to 359)           | 2.5<br>(1.9 to 3.1)                       | -20.0<br>(-34.9 to -3.9)         | -57.1<br>(-64.9 to -47.9)   |
| Montenegro      | 28<br>(22 to 36)              | 7.9<br>(6.3 to 9.9)                       | 19.9<br>(-6.8 to 55.4)           | -19.1<br>(-36.6 to 3.3)     | 16<br>(12 to 21)              | 3.4<br>(2.6 to 4.4)                       | -6.2<br>(-27.2 to 20.8)          | -43.0<br>(-56.4 to -27.0)   |
| North Macedonia | 68<br>(52 to 91)              | 6.6<br>(5.2 to 8.5)                       | -54.6<br>(-67.7 to -35.5)        | -63.3<br>(-72.9 to -49.6)   | 46<br>(34 to 70)              | 4.1<br>(3.2 to 5.9)                       | -63.5<br>(-74.1 to -41.8)        | -73.1<br>(-80.2 to -60.6)   |
| Poland          | 3,990<br>(3,130 to 4,980)     | 15.3<br>(12.0 to 19.0)                    | 47.3<br>(16.8 to 81.7)           | -14.2<br>(-31.6 to 5.0)     | 2,480<br>(1,870 to 3,200)     | 5.5<br>(4.2 to 7.1)                       | 29.3<br>(4.2 to 60.9)            | -36.3<br>(-48.9 to -20.4)   |
| Romania         | 2,380<br>(1,910 to 2,900)     | 19.0<br>(15.7 to 22.8)                    | -43.2<br>(-53.9 to -31.7)        | -56.5<br>(-64.2 to -48.4)   | 1,200<br>(945 to 1,490)       | 8.2<br>(6.8 to 9.8)                       | -57.0<br>(-65.0 to -48.0)        | -72.1<br>(-76.9 to -66.3)   |
| Serbia          | 586<br>(443 to 746)           | 9.4<br>(7.2 to 11.8)                      | 11.7<br>(-20.4 to 49.0)          | -31.0<br>(-50.7 to -8.0)    | 355<br>(267 to 462)           | 4.7<br>(3.5 to 6.0)                       | -11.6<br>(-35.1 to 18.1)         | -49.2<br>(-62.9 to -31.4)   |

|                     | Male                          |                                           |                                  |                             | Female                        |                                           |                                  |                             |
|---------------------|-------------------------------|-------------------------------------------|----------------------------------|-----------------------------|-------------------------------|-------------------------------------------|----------------------------------|-----------------------------|
|                     | 2019                          |                                           | Percent change from 1990 to 2019 |                             | 2019                          |                                           | Percent change from 1990 to 2019 |                             |
|                     | Number of attributable deaths | Attributable mortality rate (per 100,000) | Number of attributable deaths    | Attributable mortality rate | Number of attributable deaths | Attributable mortality rate (per 100,000) | Number of attributable deaths    | Attributable mortality rate |
| Slovakia            | 584<br>(440 to 744)           | 18.0<br>(13.6 to 22.9)                    | -44.1<br>(-57.8 to -25.8)        | -61.3<br>(-70.4 to -49.1)   | 356<br>(257 to 478)           | 6.9<br>(5.0 to 9.1)                       | -45.2<br>(-59.5 to -16.2)        | -66.9<br>(-75.3 to -50.3)   |
| Slovenia            | 172<br>(131 to 227)           | 10.2<br>(7.8 to 13.3)                     | 4.1<br>(-24.4 to 44.0)           | -50.6<br>(-63.5 to -32.5)   | 152<br>(112 to 203)           | 4.2<br>(3.1 to 5.6)                       | 3.2<br>(-26.3 to 38.8)           | -59.8<br>(-70.7 to -45.9)   |
| Eastern Europe      | 19,700<br>(16,200 to 23,300)  | 16.3<br>(13.5 to 19.2)                    | 49.7<br>(28.0 to 73.9)           | 8.5<br>(-6.5 to 24.6)       | 6,320<br>(4,520 to 8,040)     | 4.1<br>(3.1 to 5.1)                       | -11.0<br>(-26.3 to 4.5)          | -38.8<br>(-48.8 to -29.0)   |
| Belarus             | 470<br>(357 to 610)           | 8.7<br>(6.7 to 11.1)                      | -6.7<br>(-28.1 to 19.8)          | -30.1<br>(-45.1 to -11.3)   | 174<br>(126 to 232)           | 1.9<br>(1.4 to 2.5)                       | -46.0<br>(-57.9 to -31.0)        | -67.5<br>(-75.2 to -58.2)   |
| Estonia             | 77<br>(57 to 100)             | 8.8<br>(6.6 to 11.4)                      | -11.7<br>(-33.6 to 11.7)         | -30.8<br>(-47.2 to -12.5)   | 34<br>(22 to 50)              | 2.3<br>(1.6 to 3.2)                       | -19.6<br>(-41.9 to 3.7)          | -49.2<br>(-62.0 to -35.6)   |
| Latvia              | 121<br>(90 to 156)            | 9.7<br>(7.3 to 12.6)                      | -21.3<br>(-39.8 to -0.1)         | -23.4<br>(-40.6 to -4.6)    | 58<br>(40 to 82)              | 2.8<br>(2.0 to 3.9)                       | -26.4<br>(-44.9 to -4.3)         | -39.2<br>(-54.2 to -20.4)   |
| Lithuania           | 189<br>(147 to 235)           | 10.1<br>(7.9 to 12.4)                     | 36.8<br>(10.3 to 69.5)           | 17.4<br>(-4.5 to 43.9)      | 81<br>(57 to 106)             | 2.7<br>(2.1 to 3.5)                       | 4.0<br>(-18.6 to 26.9)           | -22.9<br>(-38.5 to -5.4)    |
| Republic of Moldova | 430<br>(358 to 500)           | 20.8<br>(17.5 to 24.1)                    | -25.5<br>(-38.4 to -10.2)        | -31.8<br>(-42.5 to -19.0)   | 122<br>(97 to 147)            | 6.2<br>(5.1 to 7.4)                       | -66.0<br>(-72.4 to -58.5)        | -65.5<br>(-72.1 to -57.7)   |



|                          | Male                                   |                                           |                                  |                                   | Female                               |                                           |                                  |                                   |
|--------------------------|----------------------------------------|-------------------------------------------|----------------------------------|-----------------------------------|--------------------------------------|-------------------------------------------|----------------------------------|-----------------------------------|
|                          | 2019                                   |                                           | Percent change from 1990 to 2019 |                                   | 2019                                 |                                           | Percent change from 1990 to 2019 |                                   |
|                          | Number of attributable deaths          | Attributable mortality rate (per 100,000) | Number of attributable deaths    | Attributable mortality rate       | Number of attributable deaths        | Attributable mortality rate (per 100,000) | Number of attributable deaths    | Attributable mortality rate       |
| Russian Federation       | 14,400<br>(11,300 to 17,700)           | 17.2<br>(13.5 to 21.0)                    | 54.5<br>(27.4 to 85.5)           | 6.5<br>(-11.5 to 27.2)            | 4,660<br>(3,010 to 6,200)            | 4.4<br>(3.1 to 5.6)                       | -4.4<br>(-25.9 to 15.6)          | -39.5<br>(-52.1 to -27.2)         |
| Ukraine                  | 3,960<br>(3,060 to 5,080)              | 15.6<br>(12.3 to 19.7)                    | 68.9<br>(34.0 to 116.9)          | 39.8<br>(11.3 to 77.0)            | 1,200<br>(915 to 1,520)              | 3.8<br>(2.9 to 4.7)                       | -11.3<br>(-29.5 to 11.0)         | -18.4<br>(-34.8 to 2.3)           |
| <b>High-income</b>       | <b>106,000<br/>(90,900 to 119,000)</b> | <b>11.0<br/>(9.4 to 12.3)</b>             | <b>23.6<br/>(14.5 to 30.7)</b>   | <b>-46.0<br/>(-49.5 to -43.2)</b> | <b>81,000<br/>(64,100 to 95,800)</b> | <b>5.2<br/>(4.3 to 6.0)</b>               | <b>19.6<br/>(7.3 to 29.4)</b>    | <b>-44.6<br/>(-48.7 to -41.0)</b> |
| Australasia              | 868<br>(706 to 1,020)                  | 3.9<br>(3.2 to 4.5)                       | 23.2<br>(7.1 to 38.8)            | -56.7<br>(-61.9 to -51.3)         | 856<br>(654 to 1,040)                | 2.5<br>(2.0 to 3.0)                       | 37.2<br>(17.5 to 56.6)           | -48.5<br>(-55.0 to -42.0)         |
| Australia                | 702<br>(566 to 832)                    | 3.7<br>(3.0 to 4.4)                       | 50.4<br>(26.8 to 72.3)           | -45.8<br>(-53.3 to -38.1)         | 682<br>(517 to 838)                  | 2.4<br>(1.9 to 2.9)                       | 87.2<br>(56.1 to 118.9)          | -30.7<br>(-40.9 to -19.8)         |
| New Zealand              | 166<br>(130 to 204)                    | 4.7<br>(3.7 to 5.8)                       | -30.1<br>(-41.2 to -18.9)        | -74.5<br>(-78.2 to -70.7)         | 174<br>(129 to 222)                  | 3.2<br>(2.5 to 4.1)                       | -32.9<br>(-44.7 to -21.5)        | -73.0<br>(-77.1 to -68.7)         |
| High-income Asia Pacific | 38,200<br>(31,500 to 43,700)           | 17.3<br>(14.4 to 19.7)                    | 60.7<br>(41.2 to 75.7)           | -54.0<br>(-58.8 to -49.9)         | 20,200<br>(14,400 to 24,900)         | 4.9<br>(3.7 to 6.0)                       | 66.5<br>(30.2 to 95.3)           | -59.4<br>(-66.2 to -53.4)         |
| Brunei Darussalam        | 17<br>(13 to 22)                       | 24.2<br>(17.6 to 32.2)                    | 61.3<br>(10.7 to 115.7)          | -26.8<br>(-51.0 to -3.2)          | 7<br>(5 to 10)                       | 7.1<br>(4.9 to 9.9)                       | 54.5<br>(-0.0 to 108.9)          | -21.7<br>(-54.0 to 10.7)          |

|                           | Male                          |                                           |                                  |                             | Female                        |                                           |                                  |                             |
|---------------------------|-------------------------------|-------------------------------------------|----------------------------------|-----------------------------|-------------------------------|-------------------------------------------|----------------------------------|-----------------------------|
|                           | 2019                          |                                           | Percent change from 1990 to 2019 |                             | 2019                          |                                           | Percent change from 1990 to 2019 |                             |
|                           | Number of attributable deaths | Attributable mortality rate (per 100,000) | Number of attributable deaths    | Attributable mortality rate | Number of attributable deaths | Attributable mortality rate (per 100,000) | Number of attributable deaths    | Attributable mortality rate |
| Japan                     | 32,700<br>(27,100 to 37,700)  | 17.5<br>(14.7 to 20.0)                    | 49.6<br>(31.0 to 63.9)           | -54.8<br>(-59.5 to -51.0)   | 16,500<br>(11,500 to 20,400)  | 4.8<br>(3.6 to 5.7)                       | 54.0<br>(18.3 to 81.6)           | -60.8<br>(-67.2 to -55.4)   |
| Republic of Korea         | 4,910<br>(2,720 to 5,800)     | 17.4<br>(9.6 to 20.6)                     | 206.1<br>(42.3 to 268.4)         | -16.1<br>(-64.9 to 1.5)     | 3,320<br>(1,730 to 4,250)     | 6.5<br>(3.4 to 8.3)                       | 177.3<br>(39.4 to 255.4)         | -32.8<br>(-67.0 to -14.2)   |
| Singapore                 | 554<br>(413 to 721)           | 18.7<br>(13.9 to 24.6)                    | 86.3<br>(31.3 to 131.9)          | -53.6<br>(-68.2 to -41.8)   | 313<br>(197 to 476)           | 7.7<br>(4.9 to 11.6)                      | 78.4<br>(-4.0 to 155.3)          | -57.5<br>(-77.4 to -39.5)   |
| High-income North America | 19,000<br>(16,400 to 21,600)  | 6.9<br>(6.0 to 7.8)                       | -11.7<br>(-18.8 to -5.3)         | -56.8<br>(-60.1 to -53.7)   | 17,400<br>(14,200 to 20,200)  | 4.4<br>(3.7 to 5.1)                       | -3.1<br>(-13.0 to 6.1)           | -44.6<br>(-49.8 to -40.2)   |
| Canada                    | 1,850<br>(1,200 to 2,470)     | 6.1<br>(3.9 to 8.1)                       | -4.4<br>(-24.1 to 11.3)          | -64.4<br>(-71.1 to -59.0)   | 1,880<br>(997 to 2,710)       | 4.0<br>(2.3 to 5.7)                       | 18.5<br>(-10.0 to 39.3)          | -51.9<br>(-62.2 to -44.6)   |
| Greenland                 | 4<br>(3 to 6)                 | 16.7<br>(9.4 to 23.4)                     | -6.8<br>(-31.8 to 19.5)          | -52.3<br>(-65.2 to -39.4)   | 3<br>(1 to 4)                 | 10.1<br>(5.3 to 14.8)                     | -27.9<br>(-50.6 to -4.9)         | -59.3<br>(-71.2 to -46.1)   |
| United States of America  | 17,100<br>(14,900 to 19,300)  | 7.0<br>(6.1 to 7.9)                       | -12.5<br>(-19.2 to -5.8)         | -56.0<br>(-59.4 to -52.8)   | 15,500<br>(12,800 to 17,900)  | 4.4<br>(3.8 to 5.1)                       | -5.2<br>(-14.3 to 4.1)           | -44.0<br>(-49.1 to -39.2)   |
| Southern Latin America    | 10,300<br>(8,650 to 11,700)   | 30.4<br>(25.6 to 34.6)                    | 87.3<br>(68.6 to 107.1)          | 2.3<br>(-7.7 to 12.2)       | 9,450<br>(7,800 to 11,100)    | 18.5<br>(15.4 to 21.6)                    | 128.3<br>(102.1 to 157.5)        | 7.5<br>(-4.2 to 20.6)       |

|                | Male                          |                                           |                                  |                             | Female                        |                                           |                                  |                             |
|----------------|-------------------------------|-------------------------------------------|----------------------------------|-----------------------------|-------------------------------|-------------------------------------------|----------------------------------|-----------------------------|
|                | 2019                          |                                           | Percent change from 1990 to 2019 |                             | 2019                          |                                           | Percent change from 1990 to 2019 |                             |
|                | Number of attributable deaths | Attributable mortality rate (per 100,000) | Number of attributable deaths    | Attributable mortality rate | Number of attributable deaths | Attributable mortality rate (per 100,000) | Number of attributable deaths    | Attributable mortality rate |
| Argentina      | 8,840<br>(7,430 to 10,100)    | 40.7<br>(34.2 to 46.6)                    | 180.9<br>(147.7 to 215.7)        | 64.4<br>(45.7 to 83.4)      | 8,110<br>(6,690 to 9,510)     | 24.2<br>(20.0 to 28.2)                    | 247.7<br>(204.3 to 295.0)        | 74.5<br>(53.0 to 97.6)      |
| Chile          | 1,140<br>(940 to 1,360)       | 11.9<br>(9.7 to 14.2)                     | -46.0<br>(-53.0 to -38.9)        | -76.5<br>(-79.5 to -73.4)   | 1,050<br>(808 to 1,290)       | 7.8<br>(6.0 to 9.5)                       | -35.5<br>(-45.8 to -25.6)        | -77.6<br>(-81.1 to -74.3)   |
| Uruguay        | 290<br>(238 to 337)           | 13.2<br>(11.0 to 15.3)                    | 33.4<br>(17.3 to 51.3)           | -10.6<br>(-21.3 to 1.4)     | 289<br>(226 to 349)           | 7.5<br>(6.0 to 8.9)                       | 64.7<br>(41.6 to 94.2)           | -14.5<br>(-26.1 to -0.7)    |
| Western Europe | 37,600<br>(31,900 to 42,600)  | 8.9<br>(7.6 to 10.1)                      | 9.8<br>(0.3 to 17.8)             | -49.2<br>(-53.3 to -45.9)   | 33,200<br>(26,400 to 39,500)  | 4.6<br>(3.7 to 5.4)                       | 0.7<br>(-10.5 to 9.8)            | -48.6<br>(-53.6 to -44.3)   |
| Andorra        | 4<br>(3 to 6)                 | 6.4<br>(4.4 to 8.8)                       | 124.4<br>(49.3 to 227.6)         | -41.0<br>(-59.0 to -17.5)   | 4<br>(2 to 6)                 | 4.0<br>(2.2 to 6.3)                       | 223.2<br>(94.4 to 380.1)         | -38.7<br>(-61.6 to -10.8)   |
| Austria        | 324<br>(268 to 383)           | 4.1<br>(3.4 to 4.8)                       | -15.8<br>(-26.3 to -4.5)         | -59.1<br>(-64.0 to -54.0)   | 247<br>(185 to 313)           | 1.8<br>(1.4 to 2.3)                       | -29.2<br>(-41.5 to -17.5)        | -59.7<br>(-66.1 to -53.7)   |
| Belgium        | 1,610<br>(1,320 to 1,870)     | 15.1<br>(12.4 to 17.5)                    | 43.8<br>(26.3 to 60.6)           | -30.7<br>(-38.5 to -22.6)   | 1,490<br>(1,120 to 1,830)     | 7.9<br>(6.1 to 9.5)                       | 61.8<br>(36.9 to 86.6)           | -13.8<br>(-24.8 to -1.8)    |
| Cyprus         | 39<br>(31 to 50)              | 5.6<br>(4.5 to 7.1)                       | 17.4<br>(-9.5 to 53.6)           | -55.2<br>(-65.1 to -42.2)   | 28<br>(20 to 37)              | 3.2<br>(2.3 to 4.3)                       | -0.5<br>(-27.2 to 45.4)          | -68.8<br>(-76.8 to -56.2)   |

|         | Male                          |                                           |                                  |                             | Female                        |                                           |                                  |                             |
|---------|-------------------------------|-------------------------------------------|----------------------------------|-----------------------------|-------------------------------|-------------------------------------------|----------------------------------|-----------------------------|
|         | 2019                          |                                           | Percent change from 1990 to 2019 |                             | 2019                          |                                           | Percent change from 1990 to 2019 |                             |
|         | Number of attributable deaths | Attributable mortality rate (per 100,000) | Number of attributable deaths    | Attributable mortality rate | Number of attributable deaths | Attributable mortality rate (per 100,000) | Number of attributable deaths    | Attributable mortality rate |
| Denmark | 658<br>(536 to 778)           | 13.3<br>(10.7 to 15.7)                    | 18.2<br>(3.3 to 33.7)            | -28.8<br>(-37.8 to -19.5)   | 608<br>(459 to 759)           | 7.3<br>(5.6 to 9.1)                       | 6.3<br>(-9.4 to 23.0)            | -30.4<br>(-39.9 to -19.8)   |
| Finland | 155<br>(105 to 209)           | 2.9<br>(2.0 to 3.9)                       | -72.4<br>(-77.3 to -68.2)        | -88.9<br>(-90.8 to -87.1)   | 116<br>(62 to 180)            | 1.3<br>(0.7 to 1.9)                       | -77.3<br>(-83.4 to -73.1)        | -88.4<br>(-91.1 to -86.5)   |
| France  | 5,180<br>(4,110 to 6,110)     | 7.9<br>(6.4 to 9.3)                       | 0.7<br>(-13.2 to 15.2)           | -55.9<br>(-61.5 to -49.9)   | 4,860<br>(3,490 to 6,150)     | 3.7<br>(2.8 to 4.6)                       | 14.5<br>(-6.6 to 36.4)           | -48.2<br>(-56.2 to -39.3)   |
| Germany | 7,050<br>(5,860 to 8,220)     | 8.2<br>(6.8 to 9.5)                       | 21.5<br>(6.1 to 38.2)            | -42.2<br>(-49.0 to -35.1)   | 5,210<br>(4,080 to 6,390)     | 3.7<br>(3.0 to 4.5)                       | -4.7<br>(-17.7 to 8.7)           | -40.1<br>(-47.3 to -32.6)   |
| Greece  | 1,540<br>(1,280 to 1,780)     | 11.8<br>(10.1 to 13.5)                    | 141.0<br>(109.1 to 178.0)        | 10.3<br>(-3.1 to 26.4)      | 1,170<br>(938 to 1,390)       | 6.8<br>(5.5 to 7.9)                       | 184.6<br>(139.7 to 230.9)        | 25.7<br>(7.7 to 44.5)       |
| Iceland | 23<br>(15 to 29)              | 8.4<br>(5.7 to 10.8)                      | 2.8<br>(-17.1 to 22.2)           | -52.3<br>(-61.3 to -43.5)   | 20<br>(11 to 29)              | 4.6<br>(2.8 to 6.7)                       | -28.5<br>(-47.6 to -13.6)        | -69.5<br>(-77.2 to -63.3)   |
| Ireland | 389<br>(308 to 466)           | 12.7<br>(10.1 to 15.3)                    | -30.6<br>(-40.5 to -20.0)        | -67.9<br>(-72.3 to -63.2)   | 424<br>(308 to 539)           | 8.8<br>(6.5 to 11.1)                      | -24.3<br>(-37.3 to -12.4)        | -65.0<br>(-70.6 to -60.0)   |
| Israel  | 318<br>(253 to 384)           | 5.9<br>(4.8 to 7.2)                       | 83.1<br>(54.4 to 114.4)          | -30.1<br>(-40.7 to -18.0)   | 239<br>(172 to 311)           | 3.2<br>(2.3 to 4.1)                       | 85.0<br>(47.1 to 127.1)          | -43.2<br>(-54.2 to -30.8)   |

|             | Male                          |                                           |                                  |                             | Female                        |                                           |                                  |                             |
|-------------|-------------------------------|-------------------------------------------|----------------------------------|-----------------------------|-------------------------------|-------------------------------------------|----------------------------------|-----------------------------|
|             | 2019                          |                                           | Percent change from 1990 to 2019 |                             | 2019                          |                                           | Percent change from 1990 to 2019 |                             |
|             | Number of attributable deaths | Attributable mortality rate (per 100,000) | Number of attributable deaths    | Attributable mortality rate | Number of attributable deaths | Attributable mortality rate (per 100,000) | Number of attributable deaths    | Attributable mortality rate |
| Italy       | 3,020<br>(2,570 to 3,440)     | 4.5<br>(3.9 to 5.1)                       | 10.2<br>(-2.0 to 20.0)           | -51.4<br>(-56.2 to -47.1)   | 2,430<br>(1,860 to 2,880)     | 2.0<br>(1.6 to 2.4)                       | 16.7<br>(-1.9 to 33.9)           | -54.7<br>(-60.7 to -48.5)   |
| Luxembourg  | 33<br>(26 to 40)              | 7.7<br>(6.1 to 9.5)                       | 22.0<br>(1.1 to 46.8)            | -51.2<br>(-59.7 to -41.7)   | 32<br>(23 to 42)              | 4.3<br>(3.2 to 5.4)                       | 39.7<br>(9.4 to 70.1)            | -40.5<br>(-52.2 to -27.4)   |
| Malta       | 34<br>(24 to 43)              | 8.6<br>(6.3 to 11.0)                      | 47.1<br>(19.0 to 77.7)           | -42.0<br>(-52.9 to -30.0)   | 24<br>(14 to 35)              | 4.1<br>(2.5 to 5.7)                       | 63.7<br>(14.7 to 109.1)          | -40.2<br>(-56.0 to -24.9)   |
| Monaco      | 5<br>(4 to 7)                 | 10.8<br>(7.9 to 13.9)                     | 49.2<br>(1.4 to 105.6)           | -13.4<br>(-40.4 to 18.1)    | 4<br>(3 to 5)                 | 5.5<br>(4.0 to 7.3)                       | 42.4<br>(-1.3 to 100.5)          | -7.2<br>(-34.3 to 29.6)     |
| Netherlands | 1,540<br>(1,240 to 1,830)     | 10.8<br>(8.7 to 12.9)                     | 32.4<br>(15.1 to 50.6)           | -38.4<br>(-46.1 to -30.2)   | 1,470<br>(1,110 to 1,850)     | 6.1<br>(4.7 to 7.6)                       | 21.5<br>(3.2 to 39.7)            | -33.7<br>(-43.1 to -24.3)   |
| Norway      | 348<br>(244 to 487)           | 7.8<br>(5.5 to 11.0)                      | -44.8<br>(-54.2 to -36.1)        | -66.7<br>(-72.0 to -61.7)   | 339<br>(197 to 521)           | 4.4<br>(2.6 to 6.6)                       | -45.8<br>(-57.7 to -35.9)        | -65.8<br>(-72.5 to -60.2)   |
| Portugal    | 1,840<br>(1,520 to 2,160)     | 17.1<br>(14.1 to 19.8)                    | 79.9<br>(53.8 to 104.3)          | -22.6<br>(-32.9 to -13.1)   | 1,170<br>(888 to 1,410)       | 6.2<br>(4.8 to 7.4)                       | 98.6<br>(64.1 to 129.1)          | -29.3<br>(-40.4 to -18.9)   |
| San Marino  | 2<br>(1 to 3)                 | 6.2<br>(4.0 to 8.7)                       | 73.0<br>(12.4 to 148.1)          | -37.1<br>(-58.9 to -10.5)   | 1<br>(1 to 2)                 | 2.2<br>(1.4 to 3.3)                       | 85.1<br>(19.6 to 180.3)          | -33.2<br>(-56.3 to 2.7)     |

|                                    | Male                                 |                                           |                                   |                                   | Female                               |                                           |                                   |                                   |
|------------------------------------|--------------------------------------|-------------------------------------------|-----------------------------------|-----------------------------------|--------------------------------------|-------------------------------------------|-----------------------------------|-----------------------------------|
|                                    | 2019                                 |                                           | Percent change from 1990 to 2019  |                                   | 2019                                 |                                           | Percent change from 1990 to 2019  |                                   |
|                                    | Number of attributable deaths        | Attributable mortality rate (per 100,000) | Number of attributable deaths     | Attributable mortality rate       | Number of attributable deaths        | Attributable mortality rate (per 100,000) | Number of attributable deaths     | Attributable mortality rate       |
| Spain                              | 3,270<br>(2,740 to 3,840)            | 7.2<br>(6.1 to 8.4)                       | 13.1<br>(-2.9 to 28.8)            | -52.4<br>(-58.6 to -46.1)         | 2,300<br>(1,750 to 2,820)            | 2.9<br>(2.3 to 3.5)                       | 31.8<br>(10.0 to 52.9)            | -51.0<br>(-57.7 to -43.7)         |
| Sweden                             | 631<br>(451 to 798)                  | 6.0<br>(4.3 to 7.5)                       | -42.2<br>(-51.3 to -34.2)         | -66.3<br>(-71.2 to -61.9)         | 537<br>(360 to 719)                  | 3.3<br>(2.3 to 4.4)                       | -39.4<br>(-50.0 to -28.7)         | -60.5<br>(-66.8 to -54.0)         |
| Switzerland                        | 451<br>(354 to 537)                  | 5.4<br>(4.3 to 6.4)                       | -37.4<br>(-46.8 to -28.6)         | -71.9<br>(-75.9 to -68.0)         | 433<br>(309 to 565)                  | 3.0<br>(2.2 to 3.7)                       | -38.4<br>(-49.4 to -27.1)         | -69.6<br>(-74.5 to -64.6)         |
| United Kingdom                     | 9,100<br>(7,500 to 10,700)           | 15.8<br>(13.1 to 18.6)                    | 2.3<br>(-8.2 to 12.3)             | -48.2<br>(-53.2 to -43.2)         | 9,990<br>(7,720 to 12,400)           | 11.0<br>(8.7 to 13.5)                     | -15.5<br>(-25.5 to -5.6)          | -43.8<br>(-49.9 to -37.8)         |
| <b>Latin America and Caribbean</b> | <b>45,100<br/>(37,400 to 53,200)</b> | <b>18.1<br/>(15.0 to 21.5)</b>            | <b>-37.4<br/>(-47.1 to -26.9)</b> | <b>-59.4<br/>(-64.8 to -53.4)</b> | <b>34,300<br/>(28,000 to 41,300)</b> | <b>11.7<br/>(9.6 to 14.1)</b>             | <b>-41.5<br/>(-52.0 to -30.2)</b> | <b>-66.0<br/>(-71.1 to -60.6)</b> |
| Andean Latin America               | 6,800<br>(5,140 to 8,990)            | 25.8<br>(19.7 to 34.1)                    | -48.2<br>(-61.3 to -33.3)         | -64.8<br>(-73.0 to -55.1)         | 5,820<br>(4,360 to 7,540)            | 20.1<br>(15.0 to 26.0)                    | -51.5<br>(-63.4 to -37.3)         | -70.1<br>(-76.9 to -62.3)         |
| Bolivia (Plurinational State of)   | 1,680<br>(1,270 to 2,150)            | 38.8<br>(29.3 to 49.9)                    | -61.4<br>(-72.7 to -44.9)         | -68.9<br>(-77.3 to -58.8)         | 1,560<br>(1,190 to 2,000)            | 33.6<br>(25.3 to 44.5)                    | -58.2<br>(-70.0 to -42.7)         | -68.0<br>(-76.3 to -58.2)         |
| Ecuador                            | 1,150<br>(858 to 1,500)              | 17.5<br>(13.0 to 22.7)                    | -25.9<br>(-43.0 to -4.1)          | -53.6<br>(-63.7 to -40.7)         | 823<br>(610 to 1,090)                | 11.6<br>(8.6 to 15.6)                     | -40.1<br>(-54.5 to -21.0)         | -67.4<br>(-74.8 to -57.5)         |

|                     | Male                          |                                           |                                  |                             | Female                        |                                           |                                  |                             |
|---------------------|-------------------------------|-------------------------------------------|----------------------------------|-----------------------------|-------------------------------|-------------------------------------------|----------------------------------|-----------------------------|
|                     | 2019                          |                                           | Percent change from 1990 to 2019 |                             | 2019                          |                                           | Percent change from 1990 to 2019 |                             |
|                     | Number of attributable deaths | Attributable mortality rate (per 100,000) | Number of attributable deaths    | Attributable mortality rate | Number of attributable deaths | Attributable mortality rate (per 100,000) | Number of attributable deaths    | Attributable mortality rate |
| Peru                | 3,970<br>(2,840 to 5,530)     | 25.6<br>(18.3 to 35.7)                    | -45.1<br>(-61.7 to -24.4)        | -65.4<br>(-75.4 to -52.6)   | 3,450<br>(2,400 to 4,680)     | 19.7<br>(13.7 to 26.7)                    | -50.1<br>(-64.4 to -30.6)        | -71.3<br>(-79.2 to -61.3)   |
| Caribbean           | 5,540<br>(4,430 to 6,810)     | 25.2<br>(20.0 to 31.1)                    | -18.7<br>(-35.8 to 2.5)          | -38.8<br>(-50.6 to -23.9)   | 4,260<br>(3,350 to 5,330)     | 17.4<br>(13.6 to 21.9)                    | -26.0<br>(-43.5 to -4.7)         | -47.0<br>(-59.2 to -33.1)   |
| Antigua and Barbuda | 5<br>(4 to 7)                 | 14.2<br>(10.5 to 18.9)                    | 30.7<br>(0.4 to 65.6)            | -20.7<br>(-38.4 to 1.2)     | 4<br>(3 to 6)                 | 9.1<br>(6.3 to 12.4)                      | 14.8<br>(-14.9 to 50.9)          | -3.7<br>(-28.8 to 26.4)     |
| Bahamas             | 18<br>(14 to 24)              | 12.8<br>(9.5 to 17.2)                     | 8.6<br>(-16.9 to 42.2)           | -47.9<br>(-59.5 to -32.6)   | 11<br>(8 to 16)               | 6.4<br>(4.6 to 8.9)                       | 1.0<br>(-26.0 to 36.1)           | -45.3<br>(-58.8 to -27.6)   |
| Barbados            | 30<br>(22 to 38)              | 15.6<br>(11.7 to 19.9)                    | 60.6<br>(22.9 to 101.5)          | -5.2<br>(-27.2 to 18.3)     | 20<br>(13 to 30)              | 8.2<br>(5.5 to 12.1)                      | 63.0<br>(8.4 to 125.6)           | 7.0<br>(-26.7 to 45.8)      |
| Belize              | 30<br>(23 to 38)              | 22.3<br>(17.1 to 28.5)                    | 30.2<br>(1.1 to 66.0)            | -28.8<br>(-43.8 to -11.3)   | 17<br>(13 to 23)              | 12.8<br>(9.1 to 17.2)                     | -16.5<br>(-36.6 to 10.0)         | -51.2<br>(-62.4 to -37.3)   |
| Bermuda             | 3<br>(2 to 4)                 | 5.3<br>(3.4 to 7.2)                       | 13.4<br>(-18.3 to 48.0)          | -52.1<br>(-65.2 to -37.9)   | 2<br>(1 to 3)                 | 2.5<br>(1.2 to 3.8)                       | -4.4<br>(-51.6 to 36.9)          | -60.8<br>(-76.7 to -46.4)   |
| Cuba                | 1,680<br>(1,290 to 2,110)     | 19.1<br>(14.6 to 23.9)                    | 67.7<br>(34.2 to 104.5)          | -10.4<br>(-28.1 to 9.1)     | 1,050<br>(757 to 1,370)       | 9.6<br>(7.1 to 12.4)                      | 71.7<br>(33.6 to 116.6)          | -23.9<br>(-39.9 to -4.3)    |

|                       | Male                          |                                           |                                  |                             | Female                        |                                           |                                  |                             |
|-----------------------|-------------------------------|-------------------------------------------|----------------------------------|-----------------------------|-------------------------------|-------------------------------------------|----------------------------------|-----------------------------|
|                       | 2019                          |                                           | Percent change from 1990 to 2019 |                             | 2019                          |                                           | Percent change from 1990 to 2019 |                             |
|                       | Number of attributable deaths | Attributable mortality rate (per 100,000) | Number of attributable deaths    | Attributable mortality rate | Number of attributable deaths | Attributable mortality rate (per 100,000) | Number of attributable deaths    | Attributable mortality rate |
| Dominica              | 6<br>(4 to 8)                 | 17.2<br>(12.3 to 23.2)                    | -13.3<br>(-34.7 to 14.9)         | -28.4<br>(-46.0 to -5.3)    | 4<br>(3 to 5)                 | 9.3<br>(6.4 to 12.7)                      | -36.5<br>(-54.0 to -12.9)        | -33.2<br>(-51.0 to -9.8)    |
| Dominican Republic    | 551<br>(395 to 750)           | 12.5<br>(9.0 to 17.0)                     | -34.4<br>(-54.7 to -3.1)         | -44.7<br>(-59.6 to -23.5)   | 419<br>(299 to 580)           | 8.9<br>(6.4 to 12.2)                      | -48.8<br>(-64.3 to -24.2)        | -60.2<br>(-71.3 to -45.4)   |
| Grenada               | 9<br>(7 to 11)                | 22.6<br>(17.5 to 28.8)                    | -37.6<br>(-50.8 to -23.5)        | -44.6<br>(-56.2 to -31.7)   | 8<br>(5 to 10)                | 14.8<br>(10.6 to 20.0)                    | -45.1<br>(-59.5 to -26.9)        | -44.7<br>(-58.9 to -27.3)   |
| Guyana                | 71<br>(51 to 95)              | 27.3<br>(19.9 to 36.3)                    | -30.1<br>(-48.8 to -6.1)         | -37.0<br>(-52.4 to -17.5)   | 44<br>(29 to 62)              | 15.5<br>(10.4 to 21.8)                    | -32.3<br>(-51.7 to -6.4)         | -38.7<br>(-55.0 to -16.9)   |
| Haiti                 | 2,530<br>(1,820 to 3,390)     | 53.8<br>(37.1 to 73.5)                    | -36.7<br>(-57.0 to -8.8)         | -52.1<br>(-64.7 to -37.1)   | 2,260<br>(1,590 to 3,060)     | 49.1<br>(33.8 to 67.4)                    | -37.6<br>(-56.4 to -11.0)        | -51.1<br>(-64.0 to -35.2)   |
| Jamaica               | 95<br>(72 to 124)             | 7.0<br>(5.3 to 9.1)                       | -32.0<br>(-46.8 to -13.7)        | -52.7<br>(-63.1 to -39.5)   | 77<br>(54 to 104)             | 4.4<br>(3.1 to 5.9)                       | -41.0<br>(-55.7 to -24.0)        | -61.8<br>(-71.3 to -50.7)   |
| Puerto Rico           | 188<br>(136 to 252)           | 6.4<br>(4.7 to 8.5)                       | -29.2<br>(-46.4 to -7.8)         | -62.2<br>(-71.6 to -51.3)   | 122<br>(80 to 169)            | 3.0<br>(2.1 to 4.1)                       | -11.4<br>(-38.7 to 18.3)         | -60.5<br>(-71.6 to -47.5)   |
| Saint Kitts and Nevis | 3<br>(2 to 4)                 | 14.0<br>(10.2 to 18.7)                    | -19.9<br>(-40.9 to 6.8)          | -47.7<br>(-60.1 to -31.4)   | 2<br>(1 to 3)                 | 8.0<br>(5.8 to 10.8)                      | -44.4<br>(-58.1 to -28.5)        | -56.9<br>(-67.2 to -45.5)   |



|                                  | Male                          |                                           |                                  |                             | Female                        |                                           |                                  |                             |
|----------------------------------|-------------------------------|-------------------------------------------|----------------------------------|-----------------------------|-------------------------------|-------------------------------------------|----------------------------------|-----------------------------|
|                                  | 2019                          |                                           | Percent change from 1990 to 2019 |                             | 2019                          |                                           | Percent change from 1990 to 2019 |                             |
|                                  | Number of attributable deaths | Attributable mortality rate (per 100,000) | Number of attributable deaths    | Attributable mortality rate | Number of attributable deaths | Attributable mortality rate (per 100,000) | Number of attributable deaths    | Attributable mortality rate |
| Saint Lucia                      | 11<br>(8 to 14)               | 13.8<br>(10.4 to 17.6)                    | 11.8<br>(-11.9 to 41.4)          | -49.2<br>(-60.2 to -35.8)   | 7<br>(5 to 10)                | 6.7<br>(4.7 to 9.4)                       | -17.1<br>(-39.0 to 11.6)         | -57.9<br>(-69.0 to -43.5)   |
| Saint Vincent and the Grenadines | 9<br>(7 to 11)                | 15.7<br>(12.0 to 20.0)                    | 10.9<br>(-13.4 to 38.4)          | -33.7<br>(-47.8 to -18.5)   | 5<br>(4 to 7)                 | 9.4<br>(6.6 to 12.9)                      | -26.7<br>(-45.4 to -3.6)         | -42.6<br>(-57.0 to -25.4)   |
| Suriname                         | 46<br>(35 to 60)              | 19.4<br>(14.7 to 25.3)                    | 13.8<br>(-13.7 to 48.4)          | -34.0<br>(-49.1 to -15.5)   | 28<br>(20 to 38)              | 9.8<br>(7.0 to 13.1)                      | -1.9<br>(-26.1 to 30.4)          | -43.9<br>(-58.0 to -26.2)   |
| Trinidad and Tobago              | 63<br>(45 to 88)              | 8.8<br>(6.4 to 12.2)                      | -35.5<br>(-53.6 to -13.2)        | -67.1<br>(-76.2 to -56.2)   | 37<br>(24 to 53)              | 4.5<br>(3.1 to 6.5)                       | -40.0<br>(-57.4 to -19.2)        | -67.5<br>(-77.1 to -55.3)   |
| United States Virgin Islands     | 5<br>(3 to 6)                 | 7.0<br>(4.9 to 9.4)                       | 54.2<br>(4.6 to 118.7)           | -21.6<br>(-47.7 to 11.9)    | 3<br>(2 to 3)                 | 2.9<br>(2.1 to 3.9)                       | 36.3<br>(-6.3 to 86.8)           | -37.5<br>(-57.1 to -14.4)   |
| Central Latin America            | 13,400<br>(10,700 to 16,500)  | 12.7<br>(10.2 to 15.7)                    | -44.0<br>(-54.6 to -30.9)        | -62.9<br>(-69.6 to -54.7)   | 9,270<br>(7,350 to 11,800)    | 7.8<br>(6.2 to 10.0)                      | -53.2<br>(-62.6 to -41.7)        | -71.2<br>(-76.9 to -64.6)   |
| Colombia                         | 1,650<br>(1,210 to 2,220)     | 7.2<br>(5.2 to 9.6)                       | -42.7<br>(-58.8 to -22.4)        | -65.4<br>(-74.3 to -53.5)   | 1,390<br>(1,010 to 1,860)     | 5.2<br>(3.8 to 7.1)                       | -40.2<br>(-56.2 to -19.8)        | -69.7<br>(-78.0 to -59.7)   |
| Costa Rica                       | 154<br>(113 to 206)           | 6.8<br>(5.0 to 9.1)                       | 8.3<br>(-20.4 to 47.8)           | -48.2<br>(-60.8 to -31.4)   | 80<br>(57 to 110)             | 2.9<br>(2.1 to 4.0)                       | -19.4<br>(-39.9 to 8.5)          | -66.7<br>(-74.7 to -56.1)   |

|                                    | Male                          |                                           |                                  |                             | Female                        |                                           |                                  |                             |
|------------------------------------|-------------------------------|-------------------------------------------|----------------------------------|-----------------------------|-------------------------------|-------------------------------------------|----------------------------------|-----------------------------|
|                                    | 2019                          |                                           | Percent change from 1990 to 2019 |                             | 2019                          |                                           | Percent change from 1990 to 2019 |                             |
|                                    | Number of attributable deaths | Attributable mortality rate (per 100,000) | Number of attributable deaths    | Attributable mortality rate | Number of attributable deaths | Attributable mortality rate (per 100,000) | Number of attributable deaths    | Attributable mortality rate |
| El Salvador                        | 445<br>(310 to 618)           | 16.7<br>(11.6 to 23.1)                    | -35.2<br>(-56.1 to -8.5)         | -46.4<br>(-62.6 to -26.3)   | 341<br>(220 to 488)           | 9.3<br>(6.0 to 13.4)                      | -47.3<br>(-65.9 to -24.3)        | -65.6<br>(-76.4 to -52.3)   |
| Guatemala                          | 2,890<br>(2,170 to 3,790)     | 54.4<br>(41.6 to 70.4)                    | -36.3<br>(-53.3 to -14.9)        | -64.2<br>(-72.8 to -53.3)   | 2,330<br>(1,740 to 3,030)     | 36.0<br>(27.0 to 47.1)                    | -42.6<br>(-56.8 to -24.0)        | -74.9<br>(-80.9 to -67.7)   |
| Honduras                           | 416<br>(318 to 536)           | 14.1<br>(10.9 to 18.4)                    | -37.1<br>(-55.0 to -12.2)        | -48.3<br>(-60.7 to -31.2)   | 195<br>(130 to 375)           | 6.3<br>(4.2 to 11.8)                      | -65.5<br>(-77.9 to -31.2)        | -70.7<br>(-80.3 to -45.6)   |
| Mexico                             | 5,990<br>(4,820 to 7,380)     | 11.6<br>(9.4 to 14.3)                     | -52.1<br>(-62.5 to -40.4)        | -65.8<br>(-72.3 to -59.1)   | 3,750<br>(3,060 to 4,610)     | 6.7<br>(5.5 to 8.3)                       | -63.6<br>(-71.0 to -54.4)        | -75.5<br>(-79.7 to -70.4)   |
| Nicaragua                          | 322<br>(253 to 399)           | 15.3<br>(11.9 to 19.0)                    | -64.8<br>(-74.2 to -50.6)        | -62.6<br>(-71.0 to -51.3)   | 221<br>(168 to 282)           | 9.0<br>(6.8 to 11.7)                      | -68.4<br>(-78.1 to -56.4)        | -65.6<br>(-74.9 to -53.9)   |
| Panama                             | 176<br>(128 to 237)           | 8.9<br>(6.5 to 12.1)                      | 47.2<br>(9.6 to 98.0)            | -31.0<br>(-49.4 to -8.9)    | 108<br>(75 to 147)            | 5.0<br>(3.5 to 6.9)                       | 28.1<br>(-6.1 to 74.4)           | -40.4<br>(-56.1 to -20.3)   |
| Venezuela (Bolivarian Republic of) | 1,320<br>(948 to 1,780)       | 10.8<br>(7.7 to 14.6)                     | -6.7<br>(-32.8 to 24.2)          | -48.2<br>(-61.7 to -32.2)   | 858<br>(600 to 1,220)         | 6.1<br>(4.3 to 8.6)                       | -17.1<br>(-41.7 to 13.2)         | -54.8<br>(-68.2 to -38.3)   |
| Tropical Latin America             | 19,400<br>(16,400 to 22,400)  | 20.2<br>(16.9 to 23.4)                    | -31.3<br>(-42.8 to -20.4)        | -59.6<br>(-64.7 to -54.5)   | 15,000<br>(11,900 to 18,100)  | 12.2<br>(9.9 to 14.6)                     | -28.9<br>(-45.1 to -13.6)        | -64.6<br>(-71.0 to -58.4)   |

|                                     | Male                                 |                                           |                                   |                                   | Female                               |                                           |                                   |                                   |
|-------------------------------------|--------------------------------------|-------------------------------------------|-----------------------------------|-----------------------------------|--------------------------------------|-------------------------------------------|-----------------------------------|-----------------------------------|
|                                     | 2019                                 |                                           | Percent change from 1990 to 2019  |                                   | 2019                                 |                                           | Percent change from 1990 to 2019  |                                   |
|                                     | Number of attributable deaths        | Attributable mortality rate (per 100,000) | Number of attributable deaths     | Attributable mortality rate       | Number of attributable deaths        | Attributable mortality rate (per 100,000) | Number of attributable deaths     | Attributable mortality rate       |
| Brazil                              | 19,000<br>(16,000 to 21,900)         | 20.2<br>(17.1 to 23.4)                    | -31.8<br>(-43.4 to -20.8)         | -60.1<br>(-65.2 to -55.1)         | 14,700<br>(11,700 to 17,700)         | 12.3<br>(9.9 to 14.7)                     | -29.1<br>(-45.4 to -13.4)         | -65.0<br>(-71.4 to -58.8)         |
| Paraguay                            | 431<br>(318 to 571)                  | 17.6<br>(13.0 to 23.3)                    | 7.4<br>(-22.0 to 43.4)            | -30.9<br>(-48.7 to -9.9)          | 308<br>(217 to 416)                  | 10.3<br>(7.3 to 13.9)                     | -18.1<br>(-40.8 to 9.2)           | -50.6<br>(-63.4 to -34.7)         |
| <b>North Africa and Middle East</b> | <b>39,700<br/>(33,400 to 46,800)</b> | <b>18.3<br/>(15.5 to 21.4)</b>            | <b>-54.1<br/>(-65.7 to -42.3)</b> | <b>-59.2<br/>(-66.4 to -52.1)</b> | <b>30,500<br/>(25,200 to 36,100)</b> | <b>13.9<br/>(11.6 to 16.4)</b>            | <b>-62.9<br/>(-71.5 to -53.5)</b> | <b>-65.1<br/>(-72.1 to -58.3)</b> |
| Afghanistan                         | 8,090<br>(5,740 to 10,900)           | 50.8<br>(40.2 to 62.8)                    | -29.3<br>(-53.8 to 8.2)           | -62.0<br>(-71.9 to -48.7)         | 8,340<br>(5,700 to 11,200)           | 44.6<br>(33.4 to 55.7)                    | -21.6<br>(-49.0 to 14.8)          | -63.4<br>(-74.9 to -50.5)         |
| Algeria                             | 1,810<br>(1,400 to 2,330)            | 13.1<br>(10.0 to 17.2)                    | -46.2<br>(-67.9 to -16.4)         | -63.1<br>(-73.0 to -50.7)         | 1,410<br>(1,070 to 1,840)            | 11.9<br>(8.8 to 16.1)                     | -51.4<br>(-69.9 to -20.9)         | -59.6<br>(-70.8 to -44.7)         |
| Bahrain                             | 29<br>(22 to 37)                     | 13.4<br>(9.6 to 17.2)                     | 92.4<br>(37.9 to 154.9)           | -41.1<br>(-56.5 to -24.6)         | 18<br>(13 to 23)                     | 10.0<br>(6.7 to 13.1)                     | 69.3<br>(24.9 to 128.2)           | -29.5<br>(-47.3 to -8.1)          |
| Egypt                               | 8,410<br>(6,140 to 11,400)           | 22.6<br>(16.7 to 30.8)                    | -64.1<br>(-74.9 to -49.1)         | -66.1<br>(-75.4 to -53.4)         | 5,740<br>(4,130 to 7,920)            | 19.4<br>(13.7 to 28.2)                    | -76.0<br>(-83.4 to -64.9)         | -70.9<br>(-79.7 to -58.3)         |
| Iran (Islamic Republic of)          | 3,170<br>(2,730 to 3,610)            | 9.7<br>(8.3 to 11.0)                      | -51.7<br>(-64.9 to -36.4)         | -60.4<br>(-67.8 to -53.1)         | 2,070<br>(1,690 to 2,410)            | 6.9<br>(5.6 to 8.0)                       | -65.1<br>(-75.8 to -52.7)         | -65.6<br>(-74.2 to -57.9)         |

|           | Male                          |                                           |                                  |                             | Female                        |                                           |                                  |                             |
|-----------|-------------------------------|-------------------------------------------|----------------------------------|-----------------------------|-------------------------------|-------------------------------------------|----------------------------------|-----------------------------|
|           | 2019                          |                                           | Percent change from 1990 to 2019 |                             | 2019                          |                                           | Percent change from 1990 to 2019 |                             |
|           | Number of attributable deaths | Attributable mortality rate (per 100,000) | Number of attributable deaths    | Attributable mortality rate | Number of attributable deaths | Attributable mortality rate (per 100,000) | Number of attributable deaths    | Attributable mortality rate |
| Iraq      | 1,200<br>(939 to 1,530)       | 9.9<br>(8.0 to 12.4)                      | -69.6<br>(-79.6 to -56.3)        | -71.2<br>(-78.7 to -60.4)   | 913<br>(689 to 1,180)         | 6.2<br>(4.8 to 8.1)                       | -60.3<br>(-75.3 to -39.4)        | -68.9<br>(-78.4 to -55.8)   |
| Jordan    | 370<br>(293 to 460)           | 11.3<br>(8.8 to 14.0)                     | 18.1<br>(-15.4 to 64.7)          | -49.5<br>(-61.6 to -35.6)   | 261<br>(194 to 347)           | 8.4<br>(6.2 to 10.9)                      | -1.6<br>(-34.1 to 47.3)          | -53.0<br>(-65.3 to -36.8)   |
| Kuwait    | 282<br>(216 to 351)           | 25.4<br>(19.3 to 31.7)                    | 292.6<br>(208.4 to 389.5)        | 32.0<br>(5.8 to 60.4)       | 115<br>(87 to 146)            | 14.1<br>(10.4 to 18.1)                    | 94.4<br>(53.8 to 143.1)          | -15.7<br>(-32.6 to 8.5)     |
| Lebanon   | 337<br>(262 to 483)           | 15.1<br>(11.7 to 21.8)                    | 41.6<br>(4.5 to 109.4)           | -29.0<br>(-46.7 to 4.0)     | 202<br>(150 to 299)           | 7.3<br>(5.4 to 10.7)                      | -1.8<br>(-32.3 to 43.8)          | -48.5<br>(-61.9 to -25.7)   |
| Libya     | 266<br>(199 to 346)           | 11.7<br>(8.7 to 15.2)                     | -24.1<br>(-48.5 to 10.2)         | -41.4<br>(-57.2 to -21.1)   | 171<br>(127 to 232)           | 7.6<br>(5.6 to 10.3)                      | -37.2<br>(-59.3 to -3.2)         | -45.9<br>(-61.6 to -23.3)   |
| Morocco   | 1,890<br>(1,400 to 2,490)     | 14.8<br>(10.9 to 19.8)                    | -63.9<br>(-75.5 to -48.0)        | -62.1<br>(-72.2 to -49.7)   | 1,350<br>(963 to 1,810)       | 10.2<br>(7.2 to 13.7)                     | -72.9<br>(-82.2 to -59.7)        | -70.5<br>(-79.9 to -59.6)   |
| Oman      | 115<br>(81 to 151)            | 22.3<br>(14.8 to 30.7)                    | -27.6<br>(-51.0 to 0.9)          | -47.4<br>(-62.9 to -25.6)   | 79<br>(52 to 106)             | 14.1<br>(8.7 to 20.5)                     | -51.2<br>(-67.8 to -28.0)        | -53.9<br>(-69.9 to -30.8)   |
| Palestine | 161<br>(131 to 202)           | 18.7<br>(15.0 to 24.6)                    | -13.6<br>(-36.9 to 14.6)         | -38.3<br>(-51.8 to -19.2)   | 98<br>(75 to 142)             | 8.6<br>(6.4 to 12.8)                      | -36.9<br>(-59.5 to -7.9)         | -50.9<br>(-63.3 to -35.6)   |

|                      | Male                          |                                           |                                  |                             | Female                        |                                           |                                  |                             |
|----------------------|-------------------------------|-------------------------------------------|----------------------------------|-----------------------------|-------------------------------|-------------------------------------------|----------------------------------|-----------------------------|
|                      | 2019                          |                                           | Percent change from 1990 to 2019 |                             | 2019                          |                                           | Percent change from 1990 to 2019 |                             |
|                      | Number of attributable deaths | Attributable mortality rate (per 100,000) | Number of attributable deaths    | Attributable mortality rate | Number of attributable deaths | Attributable mortality rate (per 100,000) | Number of attributable deaths    | Attributable mortality rate |
| Qatar                | 28<br>(20 to 39)              | 12.1<br>(8.7 to 16.7)                     | 191.5<br>(96.7 to 329.3)         | -22.6<br>(-45.2 to 9.4)     | 13<br>(9 to 18)               | 18.3<br>(12.6 to 24.8)                    | 59.9<br>(9.1 to 127.6)           | 16.5<br>(-21.8 to 62.7)     |
| Saudi Arabia         | 1,620<br>(1,200 to 2,080)     | 18.6<br>(14.5 to 23.4)                    | 58.8<br>(17.1 to 125.3)          | -34.7<br>(-50.2 to -3.2)    | 967<br>(678 to 1,300)         | 14.7<br>(10.7 to 19.5)                    | 9.9<br>(-20.7 to 53.1)           | -40.8<br>(-57.3 to -13.8)   |
| Sudan                | 3,080<br>(2,070 to 4,440)     | 22.8<br>(15.7 to 31.2)                    | -64.7<br>(-80.9 to -39.1)        | -64.7<br>(-78.8 to -49.1)   | 2,250<br>(1,510 to 3,200)     | 17.0<br>(12.1 to 22.9)                    | -71.4<br>(-84.2 to -48.3)        | -71.0<br>(-81.9 to -56.1)   |
| Syrian Arab Republic | 787<br>(568 to 1,060)         | 14.7<br>(10.8 to 19.4)                    | -50.9<br>(-68.0 to -21.9)        | -33.0<br>(-52.9 to -3.1)    | 455<br>(331 to 605)           | 10.3<br>(7.7 to 13.4)                     | -64.3<br>(-76.9 to -45.9)        | -37.9<br>(-55.7 to -14.1)   |
| Tunisia              | 619<br>(448 to 861)           | 12.6<br>(9.2 to 17.6)                     | -32.2<br>(-56.9 to 6.8)          | -51.0<br>(-66.0 to -29.7)   | 332<br>(232 to 464)           | 6.0<br>(4.3 to 8.3)                       | -63.0<br>(-77.1 to -40.3)        | -72.1<br>(-81.3 to -59.5)   |
| Turkey               | 4,740<br>(3,540 to 5,910)     | 13.4<br>(10.1 to 16.6)                    | -65.4<br>(-76.7 to -50.1)        | -69.5<br>(-78.0 to -58.9)   | 3,220<br>(2,250 to 4,080)     | 7.6<br>(5.6 to 9.6)                       | -75.6<br>(-83.9 to -63.7)        | -80.7<br>(-86.7 to -72.6)   |
| United Arab Emirates | 261<br>(170 to 365)           | 27.7<br>(15.3 to 37.6)                    | 302.8<br>(174.4 to 482.0)        | -39.7<br>(-58.4 to -11.5)   | 57<br>(36 to 82)              | 18.2<br>(7.4 to 27.3)                     | 41.4<br>(-11.5 to 109.4)         | -50.4<br>(-69.8 to -29.4)   |
| Yemen                | 2,400<br>(1,540 to 3,590)     | 26.8<br>(17.4 to 40.2)                    | -52.2<br>(-75.2 to -15.5)        | -55.1<br>(-73.1 to -32.9)   | 2,420<br>(1,630 to 3,490)     | 21.4<br>(15.0 to 29.7)                    | -60.9<br>(-75.7 to -37.0)        | -65.0<br>(-76.8 to -47.9)   |

|                                               | Male                                          |                                           |                                         |                                         | Female                                        |                                           |                                         |                                         |
|-----------------------------------------------|-----------------------------------------------|-------------------------------------------|-----------------------------------------|-----------------------------------------|-----------------------------------------------|-------------------------------------------|-----------------------------------------|-----------------------------------------|
|                                               | 2019                                          |                                           | Percent change from 1990 to 2019        |                                         | 2019                                          |                                           | Percent change from 1990 to 2019        |                                         |
|                                               | Number of attributable deaths                 | Attributable mortality rate (per 100,000) | Number of attributable deaths           | Attributable mortality rate             | Number of attributable deaths                 | Attributable mortality rate (per 100,000) | Number of attributable deaths           | Attributable mortality rate             |
| <b>South Asia</b>                             | <b>199,000</b><br><b>(170,000 to 230,000)</b> | <b>30.7</b><br><b>(26.0 to 35.2)</b>      | <b>-54.1</b><br><b>(-61.8 to -43.4)</b> | <b>-58.9</b><br><b>(-64.7 to -50.9)</b> | <b>208,000</b><br><b>(175,000 to 243,000)</b> | <b>30.6</b><br><b>(25.5 to 36.0)</b>      | <b>-48.6</b><br><b>(-58.7 to -37.1)</b> | <b>-56.7</b><br><b>(-64.7 to -47.5)</b> |
| Bangladesh                                    | 14,300<br>(11,400 to 18,400)                  | 23.4<br>(18.8 to 30.2)                    | -74.3<br>(-80.8 to -65.0)               | -72.2<br>(-78.3 to -63.4)               | 14,000<br>(10,400 to 17,400)                  | 24.1<br>(17.6 to 30.0)                    | -72.5<br>(-80.3 to -63.1)               | -67.2<br>(-75.8 to -58.1)               |
| Bhutan                                        | 56<br>(35 to 85)                              | 20.8<br>(12.8 to 30.8)                    | -78.2<br>(-87.8 to -53.2)               | -68.7<br>(-81.1 to -44.4)               | 51<br>(32 to 74)                              | 19.5<br>(12.2 to 28.1)                    | -73.3<br>(-84.9 to -40.0)               | -63.7<br>(-78.1 to -33.6)               |
| India                                         | 151,000<br>(127,000 to 176,000)               | 30.8<br>(25.9 to 35.6)                    | -53.4<br>(-62.0 to -41.2)               | -59.8<br>(-66.1 to -51.1)               | 163,000<br>(134,000 to 194,000)               | 31.3<br>(25.7 to 37.2)                    | -46.8<br>(-58.2 to -33.0)               | -58.6<br>(-67.1 to -48.3)               |
| Nepal                                         | 3,320<br>(2,490 to 4,290)                     | 31.1<br>(22.4 to 41.0)                    | -75.9<br>(-83.0 to -65.6)               | -68.2<br>(-78.6 to -54.8)               | 3,630<br>(2,840 to 4,510)                     | 32.7<br>(24.8 to 41.2)                    | -72.4<br>(-79.4 to -63.0)               | -66.4<br>(-76.0 to -54.2)               |
| Pakistan                                      | 30,400<br>(22,400 to 40,200)                  | 34.1<br>(23.9 to 45.3)                    | -24.7<br>(-44.1 to 3.4)                 | -38.4<br>(-52.7 to -20.2)               | 27,600<br>(20,800 to 35,800)                  | 23.3<br>(18.2 to 29.2)                    | -20.3<br>(-43.9 to 12.0)                | -42.1<br>(-57.3 to -22.0)               |
| <b>Southeast Asia, East Asia, and Oceania</b> | <b>151,000</b><br><b>(131,000 to 174,000)</b> | <b>18.4</b><br><b>(15.8 to 21.0)</b>      | <b>-60.5</b><br><b>(-67.0 to -52.4)</b> | <b>-67.3</b><br><b>(-71.9 to -62.0)</b> | <b>99,500</b><br><b>(81,900 to 120,000)</b>   | <b>10.0</b><br><b>(8.4 to 11.8)</b>       | <b>-70.7</b><br><b>(-76.1 to -64.0)</b> | <b>-79.2</b><br><b>(-82.4 to -75.5)</b> |
| East Asia                                     | 76,500<br>(64,600 to 90,500)                  | 13.5<br>(11.5 to 15.6)                    | -69.7<br>(-75.3 to -58.5)               | -75.3<br>(-79.2 to -68.4)               | 48,600<br>(39,200 to 61,400)                  | 6.3<br>(5.3 to 7.8)                       | -79.1<br>(-83.5 to -71.4)               | -87.0<br>(-89.4 to -82.7)               |

|                                       | Male                          |                                           |                                  |                             | Female                        |                                           |                                  |                             |
|---------------------------------------|-------------------------------|-------------------------------------------|----------------------------------|-----------------------------|-------------------------------|-------------------------------------------|----------------------------------|-----------------------------|
|                                       | 2019                          |                                           | Percent change from 1990 to 2019 |                             | 2019                          |                                           | Percent change from 1990 to 2019 |                             |
|                                       | Number of attributable deaths | Attributable mortality rate (per 100,000) | Number of attributable deaths    | Attributable mortality rate | Number of attributable deaths | Attributable mortality rate (per 100,000) | Number of attributable deaths    | Attributable mortality rate |
| China                                 | 70,600<br>(58,800 to 84,700)  | 13.0<br>(11.0 to 15.3)                    | -71.2<br>(-76.7 to -60.0)        | -76.4<br>(-80.4 to -69.7)   | 44,500<br>(35,800 to 56,900)  | 6.1<br>(5.0 to 7.6)                       | -80.3<br>(-84.6 to -72.7)        | -87.6<br>(-89.9 to -83.3)   |
| Democratic People's Republic of Korea | 2,120<br>(1,660 to 2,620)     | 24.8<br>(19.0 to 30.8)                    | -62.9<br>(-75.0 to -46.6)        | -55.0<br>(-67.6 to -40.0)   | 2,640<br>(2,010 to 3,460)     | 16.4<br>(12.6 to 21.3)                    | -55.5<br>(-70.1 to -34.1)        | -66.1<br>(-75.6 to -53.5)   |
| Taiwan (Province of China)            | 3,780<br>(2,880 to 4,820)     | 20.9<br>(15.8 to 26.8)                    | 153.2<br>(98.9 to 219.3)         | -14.8<br>(-33.3 to 7.4)     | 1,480<br>(1,060 to 1,980)     | 6.7<br>(4.9 to 8.9)                       | 121.3<br>(70.6 to 186.3)         | -41.9<br>(-55.0 to -25.6)   |
| Oceania                               | 3,460<br>(2,550 to 4,710)     | 52.9<br>(40.4 to 74.0)                    | 23.1<br>(-8.8 to 66.2)           | -36.9<br>(-50.4 to -20.0)   | 2,900<br>(2,110 to 3,840)     | 46.2<br>(35.3 to 60.3)                    | 34.3<br>(-3.0 to 81.3)           | -30.1<br>(-46.6 to -11.3)   |
| American Samoa                        | 2<br>(2 to 3)                 | 11.8<br>(8.8 to 16.0)                     | -17.2<br>(-41.4 to 11.9)         | -42.7<br>(-58.7 to -25.7)   | 2<br>(1 to 3)                 | 7.9<br>(5.4 to 11.1)                      | -24.2<br>(-50.1 to 10.8)         | -44.5<br>(-64.4 to -22.1)   |
| Cook Islands                          | 2<br>(2 to 3)                 | 21.3<br>(15.3 to 28.0)                    | -26.1<br>(-44.8 to -2.6)         | -50.2<br>(-62.7 to -36.1)   | 1<br>(1 to 1)                 | 7.5<br>(4.9 to 10.4)                      | -51.5<br>(-67.0 to -31.7)        | -69.2<br>(-78.7 to -57.5)   |
| Fiji                                  | 58<br>(41 to 78)              | 18.3<br>(13.4 to 24.5)                    | -21.4<br>(-45.7 to 13.7)         | -45.7<br>(-61.0 to -24.5)   | 37<br>(26 to 51)              | 10.1<br>(7.2 to 13.9)                     | -27.3<br>(-50.8 to 5.4)          | -51.2<br>(-66.4 to -29.8)   |
| Guam                                  | 7<br>(5 to 9)                 | 8.2<br>(5.8 to 11.1)                      | 30.6<br>(-9.1 to 72.6)           | -36.1<br>(-57.8 to -15.3)   | 5<br>(4 to 7)                 | 5.5<br>(3.9 to 7.8)                       | 13.6<br>(-24.2 to 54.0)          | -47.5<br>(-68.1 to -26.8)   |

|                                  | Male                          |                                           |                                  |                             | Female                        |                                           |                                  |                             |
|----------------------------------|-------------------------------|-------------------------------------------|----------------------------------|-----------------------------|-------------------------------|-------------------------------------------|----------------------------------|-----------------------------|
|                                  | 2019                          |                                           | Percent change from 1990 to 2019 |                             | 2019                          |                                           | Percent change from 1990 to 2019 |                             |
|                                  | Number of attributable deaths | Attributable mortality rate (per 100,000) | Number of attributable deaths    | Attributable mortality rate | Number of attributable deaths | Attributable mortality rate (per 100,000) | Number of attributable deaths    | Attributable mortality rate |
| Kiribati                         | 12<br>(9 to 16)               | 38.6<br>(29.6 to 47.9)                    | -28.2<br>(-48.4 to -2.7)         | -37.8<br>(-51.8 to -21.3)   | 11<br>(8 to 14)               | 29.8<br>(21.9 to 39.0)                    | -31.0<br>(-52.5 to -3.7)         | -40.2<br>(-54.5 to -20.9)   |
| Marshall Islands                 | 5<br>(4 to 8)                 | 28.5<br>(20.1 to 39.4)                    | -32.9<br>(-51.6 to -9.8)         | -49.7<br>(-64.2 to -33.5)   | 4<br>(3 to 5)                 | 21.7<br>(14.6 to 32.7)                    | -38.0<br>(-57.3 to -13.1)        | -45.1<br>(-62.5 to -23.6)   |
| Micronesia (Federated States of) | 10<br>(7 to 14)               | 32.2<br>(22.4 to 43.8)                    | -57.3<br>(-70.6 to -41.4)        | -49.8<br>(-63.9 to -33.5)   | 7<br>(5 to 10)                | 21.8<br>(14.6 to 32.1)                    | -63.4<br>(-75.6 to -48.3)        | -57.3<br>(-71.0 to -40.0)   |
| Nauru                            | 1<br>(1 to 2)                 | 33.5<br>(23.0 to 49.5)                    | -45.5<br>(-59.5 to -28.7)        | -31.4<br>(-50.7 to -10.9)   | 1<br>(1 to 1)                 | 21.6<br>(14.4 to 34.5)                    | -50.1<br>(-63.7 to -32.7)        | -42.3<br>(-60.0 to -22.7)   |
| Niue                             | 0<br>(0 to 0)                 | 20.6<br>(15.1 to 27.3)                    | -50.9<br>(-63.5 to -35.2)        | -39.6<br>(-54.7 to -20.9)   | 0<br>(0 to 0)                 | 11.8<br>(8.4 to 15.8)                     | -62.1<br>(-72.4 to -47.2)        | -44.1<br>(-58.9 to -23.1)   |
| Northern Mariana Islands         | 3<br>(2 to 4)                 | 14.4<br>(10.8 to 19.0)                    | 6.5<br>(-22.5 to 39.3)           | -34.5<br>(-52.8 to -17.4)   | 1<br>(1 to 2)                 | 6.1<br>(4.3 to 8.9)                       | -12.6<br>(-38.5 to 16.5)         | -48.5<br>(-67.0 to -30.2)   |
| Palau                            | 4<br>(2 to 5)                 | 41.1<br>(28.9 to 62.4)                    | -11.1<br>(-40.1 to 23.5)         | -42.0<br>(-60.9 to -22.2)   | 2<br>(1 to 4)                 | 29.5<br>(19.3 to 49.9)                    | -36.6<br>(-61.1 to -9.6)         | -47.0<br>(-68.6 to -27.7)   |
| Papua New Guinea                 | 2,940<br>(2,090 to 4,040)     | 56.0<br>(41.9 to 85.4)                    | 31.6<br>(-5.7 to 81.7)           | -38.4<br>(-53.4 to -18.4)   | 2,510<br>(1,790 to 3,350)     | 52.5<br>(39.3 to 70.8)                    | 44.3<br>(0.9 to 98.9)            | -30.9<br>(-48.5 to -9.8)    |



|                 | Male                          |                                           |                                  |                             | Female                        |                                           |                                  |                             |
|-----------------|-------------------------------|-------------------------------------------|----------------------------------|-----------------------------|-------------------------------|-------------------------------------------|----------------------------------|-----------------------------|
|                 | 2019                          |                                           | Percent change from 1990 to 2019 |                             | 2019                          |                                           | Percent change from 1990 to 2019 |                             |
|                 | Number of attributable deaths | Attributable mortality rate (per 100,000) | Number of attributable deaths    | Attributable mortality rate | Number of attributable deaths | Attributable mortality rate (per 100,000) | Number of attributable deaths    | Attributable mortality rate |
| Samoa           | 18<br>(13 to 23)              | 26.4<br>(20.0 to 34.0)                    | -26.7<br>(-47.9 to 0.4)          | -45.7<br>(-59.0 to -30.1)   | 15<br>(10 to 21)              | 20.8<br>(14.7 to 29.4)                    | -22.4<br>(-47.5 to 9.4)          | -41.9<br>(-59.6 to -20.4)   |
| Solomon Islands | 190<br>(147 to 234)           | 106.1<br>(81.1 to 131.5)                  | -10.4<br>(-30.6 to 17.2)         | -48.6<br>(-60.6 to -28.6)   | 137<br>(107 to 172)           | 87.3<br>(65.3 to 109.3)                   | -3.3<br>(-27.0 to 29.4)          | -44.3<br>(-58.4 to -24.3)   |
| Tokelau         | 0<br>(0 to 0)                 | 12.5<br>(8.6 to 18.1)                     | -64.1<br>(-75.0 to -49.5)        | -52.9<br>(-66.3 to -37.4)   | 0<br>(0 to 0)                 | 11.1<br>(7.1 to 16.9)                     | -72.4<br>(-82.6 to -60.5)        | -59.0<br>(-72.7 to -42.2)   |
| Tonga           | 9<br>(7 to 12)                | 26.5<br>(19.9 to 34.6)                    | -20.8<br>(-39.2 to 4.8)          | -35.9<br>(-50.5 to -17.6)   | 6<br>(4 to 8)                 | 12.3<br>(8.5 to 17.1)                     | -29.4<br>(-49.8 to -1.2)         | -51.0<br>(-65.3 to -32.8)   |
| Tuvalu          | 1<br>(1 to 1)                 | 22.4<br>(15.4 to 31.9)                    | -71.4<br>(-81.8 to -57.6)        | -70.9<br>(-80.7 to -58.7)   | 1<br>(0 to 1)                 | 15.2<br>(9.7 to 22.9)                     | -79.6<br>(-87.1 to -67.8)        | -78.5<br>(-86.1 to -67.7)   |
| Vanuatu         | 41<br>(30 to 54)              | 40.3<br>(29.5 to 53.8)                    | 33.2<br>(-0.0 to 83.2)           | -26.4<br>(-43.5 to -3.1)    | 30<br>(22 to 41)              | 31.9<br>(22.5 to 44.6)                    | 26.9<br>(-10.2 to 79.5)          | -31.5<br>(-51.8 to -3.3)    |
| Southeast Asia  | 71,500<br>(59,100 to 83,300)  | 31.4<br>(25.6 to 36.8)                    | -44.3<br>(-56.0 to -30.6)        | -50.1<br>(-58.1 to -40.0)   | 48,000<br>(36,700 to 58,500)  | 18.0<br>(13.8 to 21.9)                    | -54.0<br>(-64.8 to -39.7)        | -61.8<br>(-70.1 to -52.2)   |
| Cambodia        | 4,630<br>(3,760 to 5,620)     | 95.2<br>(77.5 to 115.4)                   | -62.1<br>(-70.2 to -51.6)        | -53.2<br>(-62.6 to -42.9)   | 4,000<br>(3,130 to 4,870)     | 66.2<br>(50.4 to 81.9)                    | -62.1<br>(-70.8 to -50.6)        | -60.4<br>(-69.0 to -50.4)   |

|                                  | Male                          |                                           |                                  |                             | Female                        |                                           |                                  |                             |
|----------------------------------|-------------------------------|-------------------------------------------|----------------------------------|-----------------------------|-------------------------------|-------------------------------------------|----------------------------------|-----------------------------|
|                                  | 2019                          |                                           | Percent change from 1990 to 2019 |                             | 2019                          |                                           | Percent change from 1990 to 2019 |                             |
|                                  | Number of attributable deaths | Attributable mortality rate (per 100,000) | Number of attributable deaths    | Attributable mortality rate | Number of attributable deaths | Attributable mortality rate (per 100,000) | Number of attributable deaths    | Attributable mortality rate |
| Indonesia                        | 14,000<br>(11,100 to 16,900)  | 18.4<br>(14.6 to 22.3)                    | -68.1<br>(-75.4 to -57.4)        | -65.0<br>(-72.0 to -55.0)   | 9,590<br>(7,430 to 11,900)    | 11.2<br>(8.6 to 14.0)                     | -71.9<br>(-80.0 to -62.2)        | -70.4<br>(-78.0 to -61.9)   |
| Lao People's Democratic Republic | 1,430<br>(1,050 to 1,880)     | 60.9<br>(45.4 to 77.2)                    | -71.4<br>(-79.6 to -60.2)        | -67.4<br>(-75.3 to -57.4)   | 1,130<br>(798 to 1,520)       | 45.6<br>(33.1 to 59.7)                    | -72.5<br>(-80.9 to -61.4)        | -69.7<br>(-78.3 to -59.4)   |
| Malaysia                         | 5,250<br>(3,290 to 7,000)     | 46.0<br>(28.7 to 61.1)                    | 209.4<br>(56.1 to 308.6)         | 32.8<br>(-36.1 to 76.1)     | 2,260<br>(1,180 to 3,230)     | 21.2<br>(11.3 to 30.4)                    | 129.7<br>(13.0 to 231.2)         | 17.8<br>(-44.9 to 72.1)     |
| Maldives                         | 9<br>(7 to 12)                | 6.5<br>(4.6 to 8.4)                       | -44.4<br>(-65.1 to -15.4)        | -66.1<br>(-75.5 to -53.6)   | 6<br>(4 to 9)                 | 4.8<br>(3.4 to 6.7)                       | -65.9<br>(-79.1 to -43.5)        | -79.0<br>(-85.7 to -69.1)   |
| Mauritius                        | 66<br>(48 to 88)              | 10.8<br>(7.9 to 14.3)                     | -31.7<br>(-46.1 to -14.1)        | -68.3<br>(-74.9 to -60.7)   | 28<br>(15 to 42)              | 3.8<br>(2.3 to 5.4)                       | -38.2<br>(-59.0 to -20.4)        | -69.3<br>(-77.5 to -60.9)   |
| Myanmar                          | 8,240<br>(6,140 to 10,600)    | 43.4<br>(33.2 to 54.1)                    | -67.7<br>(-80.2 to -47.1)        | -65.1<br>(-75.1 to -49.3)   | 6,410<br>(4,660 to 8,330)     | 28.1<br>(20.5 to 35.8)                    | -74.9<br>(-83.9 to -57.1)        | -73.6<br>(-82.1 to -60.0)   |
| Philippines                      | 19,500<br>(15,300 to 24,200)  | 60.2<br>(44.9 to 76.9)                    | -0.8<br>(-23.2 to 25.4)          | -20.5<br>(-39.2 to -1.7)    | 14,400<br>(10,200 to 19,000)  | 41.3<br>(26.7 to 56.1)                    | -4.1<br>(-30.1 to 26.6)          | -34.2<br>(-58.4 to -16.6)   |
| Seychelles                       | 22<br>(16 to 27)              | 53.1<br>(38.9 to 65.6)                    | 52.8<br>(21.4 to 90.9)           | -15.3<br>(-32.3 to 3.7)     | 9<br>(6 to 12)                | 16.8<br>(11.5 to 22.6)                    | 36.5<br>(6.3 to 69.6)            | -7.2<br>(-26.9 to 16.1)     |

|                            | Male                                    |                                           |                                  |                                   | Female                                  |                                           |                                  |                                   |
|----------------------------|-----------------------------------------|-------------------------------------------|----------------------------------|-----------------------------------|-----------------------------------------|-------------------------------------------|----------------------------------|-----------------------------------|
|                            | 2019                                    |                                           | Percent change from 1990 to 2019 |                                   | 2019                                    |                                           | Percent change from 1990 to 2019 |                                   |
|                            | Number of attributable deaths           | Attributable mortality rate (per 100,000) | Number of attributable deaths    | Attributable mortality rate       | Number of attributable deaths           | Attributable mortality rate (per 100,000) | Number of attributable deaths    | Attributable mortality rate       |
| Sri Lanka                  | 1,200<br>(795 to 1,720)                 | 13.1<br>(8.7 to 18.6)                     | -38.9<br>(-58.5 to -12.9)        | -68.9<br>(-78.4 to -55.4)         | 690<br>(432 to 1,100)                   | 6.0<br>(3.8 to 9.6)                       | -47.7<br>(-66.2 to -14.9)        | -78.9<br>(-86.2 to -65.9)         |
| Thailand                   | 9,320<br>(5,520 to 12,900)              | 22.9<br>(14.2 to 31.3)                    | 96.5<br>(-9.9 to 187.3)          | -13.7<br>(-62.3 to 24.9)          | 4,990<br>(2,680 to 7,290)               | 9.8<br>(5.5 to 14.0)                      | 58.8<br>(-34.5 to 141.4)         | -40.0<br>(-75.0 to -9.5)          |
| Timor-Leste                | 231<br>(168 to 299)                     | 51.3<br>(35.4 to 67.8)                    | -67.4<br>(-77.7 to -53.3)        | -57.0<br>(-69.2 to -41.5)         | 186<br>(133 to 240)                     | 39.7<br>(28.5 to 52.3)                    | -69.8<br>(-79.0 to -55.6)        | -65.2<br>(-74.7 to -52.0)         |
| Viet Nam                   | 7,580<br>(6,080 to 9,400)               | 24.8<br>(20.1 to 30.7)                    | -40.3<br>(-54.7 to -20.9)        | -46.0<br>(-57.5 to -28.8)         | 4,290<br>(3,150 to 5,720)               | 9.9<br>(7.3 to 13.0)                      | -51.3<br>(-64.7 to -33.4)        | -65.2<br>(-74.4 to -52.7)         |
| <b>Sub-Saharan Africa</b>  | <b>294,000<br/>(240,000 to 358,000)</b> | <b>82.8<br/>(69.2 to 97.2)</b>            | <b>-22.7<br/>(-37.8 to -1.1)</b> | <b>-43.6<br/>(-51.1 to -33.5)</b> | <b>252,000<br/>(207,000 to 304,000)</b> | <b>60.7<br/>(50.2 to 71.2)</b>            | <b>-20.2<br/>(-37.7 to 0.4)</b>  | <b>-45.5<br/>(-54.1 to -35.4)</b> |
| Central Sub-Saharan Africa | 25,600<br>(18,800 to 33,800)            | 86.8<br>(62.4 to 116.4)                   | -37.7<br>(-54.0 to -17.0)        | -46.9<br>(-57.2 to -34.2)         | 23,100<br>(17,000 to 30,400)            | 60.3<br>(42.3 to 83.4)                    | -34.5<br>(-55.1 to -9.2)         | -47.8<br>(-60.7 to -32.6)         |
| Angola                     | 4,990<br>(3,850 to 6,520)               | 72.0<br>(55.9 to 90.4)                    | -43.3<br>(-67.2 to -1.8)         | -56.0<br>(-70.0 to -36.7)         | 4,060<br>(2,910 to 5,480)               | 41.4<br>(31.1 to 54.4)                    | -54.7<br>(-74.8 to -12.5)        | -68.2<br>(-79.6 to -46.8)         |
| Central African Republic   | 2,690<br>(1,780 to 3,860)               | 151.3<br>(108.0 to 202.3)                 | 9.3<br>(-26.6 to 58.3)           | -25.0<br>(-41.5 to -4.2)          | 2,110<br>(1,470 to 3,090)               | 101.2<br>(68.6 to 143.9)                  | 7.3<br>(-31.5 to 65.1)           | -23.2<br>(-45.0 to 6.0)           |

|                                  | Male                          |                                           |                                  |                             | Female                        |                                           |                                  |                             |
|----------------------------------|-------------------------------|-------------------------------------------|----------------------------------|-----------------------------|-------------------------------|-------------------------------------------|----------------------------------|-----------------------------|
|                                  | 2019                          |                                           | Percent change from 1990 to 2019 |                             | 2019                          |                                           | Percent change from 1990 to 2019 |                             |
|                                  | Number of attributable deaths | Attributable mortality rate (per 100,000) | Number of attributable deaths    | Attributable mortality rate | Number of attributable deaths | Attributable mortality rate (per 100,000) | Number of attributable deaths    | Attributable mortality rate |
| Congo                            | 653<br>(471 to 869)           | 56.1<br>(40.2 to 75.8)                    | -26.5<br>(-45.9 to -0.8)         | -53.3<br>(-64.1 to -40.2)   | 553<br>(393 to 750)           | 42.5<br>(29.5 to 58.2)                    | -25.6<br>(-49.2 to 4.3)          | -48.5<br>(-63.8 to -30.2)   |
| Democratic Republic of the Congo | 16,900<br>(11,500 to 23,700)  | 91.2<br>(61.3 to 130.7)                   | -40.0<br>(-57.9 to -16.9)        | -44.6<br>(-57.1 to -29.9)   | 16,200<br>(11,100 to 22,400)  | 65.6<br>(43.1 to 96.1)                    | -29.8<br>(-53.9 to -0.9)         | -42.7<br>(-57.2 to -25.4)   |
| Equatorial Guinea                | 116<br>(78 to 167)            | 51.8<br>(36.7 to 69.9)                    | -69.1<br>(-81.8 to -44.5)        | -69.1<br>(-79.8 to -54.0)   | 92<br>(59 to 136)             | 31.2<br>(20.2 to 44.8)                    | -70.6<br>(-85.1 to -42.5)        | -72.3<br>(-83.8 to -51.3)   |
| Gabon                            | 226<br>(161 to 304)           | 53.0<br>(37.3 to 72.3)                    | -38.1<br>(-54.4 to -15.8)        | -49.8<br>(-62.0 to -35.1)   | 125<br>(86 to 176)            | 23.1<br>(15.5 to 33.5)                    | -53.0<br>(-67.3 to -31.9)        | -61.9<br>(-73.0 to -46.4)   |
| Eastern Sub-Saharan Africa       | 89,300<br>(72,800 to 109,000) | 79.4<br>(65.7 to 93.1)                    | -43.4<br>(-54.9 to -26.7)        | -51.3<br>(-59.0 to -41.5)   | 77,100<br>(63,000 to 93,800)  | 58.4<br>(47.9 to 68.7)                    | -38.1<br>(-53.4 to -22.1)        | -51.3<br>(-59.3 to -42.1)   |
| Burundi                          | 2,670<br>(1,820 to 3,870)     | 89.1<br>(65.2 to 116.2)                   | -34.7<br>(-55.6 to 0.7)          | -47.5<br>(-60.4 to -29.7)   | 2,500<br>(1,640 to 3,550)     | 71.5<br>(48.3 to 98.3)                    | -29.4<br>(-56.1 to 6.5)          | -41.4<br>(-58.5 to -20.1)   |
| Comoros                          | 142<br>(104 to 188)           | 61.6<br>(45.6 to 81.0)                    | -54.9<br>(-69.2 to -25.7)        | -52.1<br>(-64.5 to -26.9)   | 166<br>(118 to 215)           | 58.5<br>(41.4 to 75.4)                    | -45.6<br>(-61.8 to -8.7)         | -48.5<br>(-61.7 to -21.3)   |
| Djibouti                         | 251<br>(179 to 354)           | 69.6<br>(50.9 to 93.6)                    | 9.6<br>(-29.0 to 72.1)           | -37.6<br>(-53.1 to -15.1)   | 176<br>(122 to 244)           | 47.1<br>(33.7 to 64.9)                    | -7.3<br>(-42.8 to 49.1)          | -43.7<br>(-60.5 to -22.5)   |

|            | Male                          |                                           |                                  |                             | Female                        |                                           |                                  |                             |
|------------|-------------------------------|-------------------------------------------|----------------------------------|-----------------------------|-------------------------------|-------------------------------------------|----------------------------------|-----------------------------|
|            | 2019                          |                                           | Percent change from 1990 to 2019 |                             | 2019                          |                                           | Percent change from 1990 to 2019 |                             |
|            | Number of attributable deaths | Attributable mortality rate (per 100,000) | Number of attributable deaths    | Attributable mortality rate | Number of attributable deaths | Attributable mortality rate (per 100,000) | Number of attributable deaths    | Attributable mortality rate |
| Eritrea    | 1,790<br>(1,060 to 2,900)     | 124.8<br>(69.8 to 213.1)                  | -35.8<br>(-63.7 to 5.7)          | -41.8<br>(-60.8 to -11.3)   | 1,450<br>(908 to 2,290)       | 81.1<br>(49.1 to 138.6)                   | -26.5<br>(-61.7 to 35.3)         | -38.7<br>(-62.3 to 2.1)     |
| Ethiopia   | 20,600<br>(16,600 to 25,900)  | 72.4<br>(57.7 to 88.9)                    | -63.7<br>(-73.3 to -47.2)        | -66.6<br>(-74.8 to -52.6)   | 16,400<br>(13,100 to 20,400)  | 52.2<br>(42.5 to 61.7)                    | -60.9<br>(-73.6 to -46.1)        | -65.5<br>(-73.9 to -54.1)   |
| Kenya      | 8,130<br>(6,370 to 10,000)    | 73.9<br>(56.4 to 93.7)                    | -24.1<br>(-41.8 to -1.6)         | -32.0<br>(-43.6 to -18.5)   | 6,910<br>(5,310 to 8,880)     | 51.0<br>(37.6 to 67.8)                    | -21.5<br>(-41.5 to 3.9)          | -39.5<br>(-51.8 to -25.3)   |
| Madagascar | 5,290<br>(3,930 to 7,070)     | 70.8<br>(53.9 to 91.9)                    | -38.9<br>(-55.6 to -16.8)        | -47.6<br>(-59.4 to -32.9)   | 5,300<br>(3,870 to 6,940)     | 65.6<br>(48.0 to 86.1)                    | -28.5<br>(-49.2 to -3.3)         | -39.9<br>(-55.3 to -22.4)   |
| Malawi     | 3,970<br>(3,060 to 5,070)     | 89.6<br>(71.4 to 109.2)                   | -41.5<br>(-57.2 to -19.2)        | -39.3<br>(-52.2 to -23.3)   | 3,250<br>(2,490 to 4,190)     | 54.2<br>(42.1 to 66.9)                    | -48.3<br>(-63.9 to -26.4)        | -53.7<br>(-64.6 to -39.7)   |
| Mozambique | 6,600<br>(4,880 to 8,690)     | 94.5<br>(73.9 to 118.4)                   | -35.3<br>(-59.3 to 12.9)         | -34.2<br>(-50.9 to 7.7)     | 5,860<br>(4,120 to 7,920)     | 57.4<br>(41.4 to 74.0)                    | -34.2<br>(-63.1 to 16.4)         | -48.7<br>(-66.2 to -24.0)   |
| Rwanda     | 2,220<br>(1,650 to 2,950)     | 75.0<br>(55.6 to 95.4)                    | -64.4<br>(-75.6 to -42.1)        | -58.0<br>(-68.6 to -43.0)   | 2,170<br>(1,620 to 2,780)     | 55.7<br>(40.2 to 70.6)                    | -54.2<br>(-70.4 to -33.2)        | -55.6<br>(-66.3 to -39.7)   |
| Somalia    | 10,400<br>(6,970 to 14,900)   | 138.5<br>(102.6 to 183.3)                 | 31.9<br>(-12.5 to 105.3)         | -33.3<br>(-49.0 to 11.3)    | 8,080<br>(5,460 to 11,800)    | 99.1<br>(68.9 to 144.0)                   | 51.7<br>(4.2 to 123.2)           | -30.2<br>(-49.4 to 4.0)     |

|                             | Male                          |                                           |                                  |                             | Female                        |                                           |                                  |                             |
|-----------------------------|-------------------------------|-------------------------------------------|----------------------------------|-----------------------------|-------------------------------|-------------------------------------------|----------------------------------|-----------------------------|
|                             | 2019                          |                                           | Percent change from 1990 to 2019 |                             | 2019                          |                                           | Percent change from 1990 to 2019 |                             |
|                             | Number of attributable deaths | Attributable mortality rate (per 100,000) | Number of attributable deaths    | Attributable mortality rate | Number of attributable deaths | Attributable mortality rate (per 100,000) | Number of attributable deaths    | Attributable mortality rate |
| South Sudan                 | 3,920<br>(2,820 to 5,360)     | 93.2<br>(71.6 to 118.8)                   | -32.6<br>(-53.5 to -6.1)         | -43.2<br>(-56.9 to -27.5)   | 2,820<br>(1,930 to 4,100)     | 69.4<br>(52.4 to 90.3)                    | -32.2<br>(-55.1 to 1.6)          | -43.6<br>(-56.9 to -25.3)   |
| Uganda                      | 6,720<br>(5,040 to 8,870)     | 73.3<br>(56.3 to 92.1)                    | -22.6<br>(-47.3 to 16.4)         | -32.3<br>(-47.0 to -13.0)   | 6,020<br>(4,370 to 7,880)     | 52.1<br>(38.8 to 66.5)                    | -0.4<br>(-38.1 to 53.3)          | -27.7<br>(-48.2 to 1.6)     |
| United Republic of Tanzania | 13,200<br>(10,100 to 17,200)  | 73.8<br>(58.6 to 90.7)                    | -38.7<br>(-56.1 to -15.4)        | -53.8<br>(-63.9 to -41.5)   | 13,300<br>(10,000 to 17,400)  | 61.6<br>(48.9 to 76.7)                    | -30.4<br>(-49.0 to -1.2)         | -51.4<br>(-62.6 to -37.5)   |
| Zambia                      | 3,240<br>(2,460 to 4,210)     | 68.7<br>(52.4 to 86.5)                    | -51.5<br>(-65.8 to -28.3)        | -55.1<br>(-65.4 to -40.8)   | 2,690<br>(2,020 to 3,500)     | 48.9<br>(37.1 to 62.4)                    | -54.1<br>(-68.3 to -33.9)        | -61.0<br>(-71.2 to -47.7)   |
| Southern Sub-Saharan Africa | 17,100<br>(14,500 to 19,800)  | 67.0<br>(56.8 to 76.8)                    | -3.9<br>(-18.0 to 14.4)          | -28.7<br>(-37.6 to -19.1)   | 12,300<br>(10,200 to 14,600)  | 38.1<br>(31.1 to 45.3)                    | -14.8<br>(-28.5 to 1.0)          | -37.8<br>(-46.3 to -28.2)   |
| Botswana                    | 554<br>(405 to 729)           | 88.1<br>(65.5 to 113.6)                   | 42.6<br>(3.8 to 90.4)            | -28.7<br>(-47.3 to -5.2)    | 378<br>(254 to 546)           | 47.5<br>(31.9 to 69.1)                    | 39.6<br>(0.7 to 94.6)            | -28.9<br>(-48.6 to -1.1)    |
| Eswatini                    | 262<br>(184 to 353)           | 79.6<br>(57.9 to 107.0)                   | -18.4<br>(-41.6 to 15.0)         | -27.9<br>(-43.8 to -6.2)    | 167<br>(111 to 231)           | 41.3<br>(27.2 to 57.0)                    | -25.7<br>(-49.9 to 7.7)          | -38.7<br>(-57.3 to -14.1)   |
| Lesotho                     | 879<br>(684 to 1,090)         | 141.4<br>(113.0 to 174.7)                 | 4.5<br>(-20.9 to 34.8)           | 5.3<br>(-15.2 to 31.0)      | 606<br>(445 to 803)           | 78.8<br>(57.9 to 103.6)                   | -8.5<br>(-34.3 to 24.1)          | 1.9<br>(-25.7 to 38.8)      |

|                            | Male                            |                                           |                                  |                             | Female                          |                                           |                                  |                             |
|----------------------------|---------------------------------|-------------------------------------------|----------------------------------|-----------------------------|---------------------------------|-------------------------------------------|----------------------------------|-----------------------------|
|                            | 2019                            |                                           | Percent change from 1990 to 2019 |                             | 2019                            |                                           | Percent change from 1990 to 2019 |                             |
|                            | Number of attributable deaths   | Attributable mortality rate (per 100,000) | Number of attributable deaths    | Attributable mortality rate | Number of attributable deaths   | Attributable mortality rate (per 100,000) | Number of attributable deaths    | Attributable mortality rate |
| Namibia                    | 499<br>(350 to 693)             | 77.6<br>(55.9 to 106.2)                   | -7.4<br>(-34.0 to 30.3)          | -35.9<br>(-51.2 to -15.6)   | 335<br>(229 to 482)             | 37.4<br>(25.5 to 53.0)                    | -14.7<br>(-41.5 to 25.6)         | -48.9<br>(-63.8 to -29.5)   |
| South Africa               | 9,570<br>(8,210 to 10,900)      | 51.7<br>(44.1 to 59.1)                    | -18.9<br>(-31.0 to -4.8)         | -38.9<br>(-46.8 to -30.5)   | 6,900<br>(5,720 to 8,110)       | 29.1<br>(24.1 to 34.3)                    | -31.6<br>(-42.7 to -18.5)        | -50.7<br>(-57.4 to -42.7)   |
| Zimbabwe                   | 5,350<br>(4,140 to 6,600)       | 132.9<br>(102.0 to 162.5)                 | 36.6<br>(5.0 to 81.4)            | 4.9<br>(-16.1 to 30.2)      | 3,930<br>(2,910 to 5,110)       | 78.0<br>(52.9 to 104.2)                   | 39.6<br>(2.4 to 88.9)            | -1.0<br>(-24.5 to 30.1)     |
| Western Sub-Saharan Africa | 162,000<br>(129,000 to 201,000) | 88.8<br>(72.6 to 106.6)                   | -1.0<br>(-23.2 to 32.7)          | -37.9<br>(-48.1 to -23.4)   | 139,000<br>(112,000 to 172,000) | 69.3<br>(56.9 to 83.0)                    | -1.5<br>(-26.0 to 28.8)          | -41.2<br>(-52.3 to -27.4)   |
| Benin                      | 4,000<br>(2,750 to 5,610)       | 95.7<br>(70.2 to 125.6)                   | -5.4<br>(-37.0 to 38.9)          | -40.9<br>(-55.4 to -22.8)   | 3,530<br>(2,400 to 4,920)       | 70.1<br>(50.6 to 91.9)                    | -3.9<br>(-36.4 to 41.6)          | -43.8<br>(-58.9 to -25.5)   |
| Burkina Faso               | 11,200<br>(7,790 to 15,500)     | 127.2<br>(100.2 to 160.1)                 | 26.5<br>(-12.7 to 86.3)          | -30.1<br>(-45.4 to -9.8)    | 10,400<br>(7,510 to 14,200)     | 94.4<br>(74.2 to 120.2)                   | 24.4<br>(-15.2 to 85.7)          | -34.5<br>(-51.1 to -12.6)   |
| Cabo Verde                 | 89<br>(68 to 110)               | 51.5<br>(39.2 to 63.5)                    | 18.0<br>(-13.0 to 55.9)          | -0.5<br>(-22.9 to 26.6)     | 61<br>(45 to 80)                | 23.6<br>(17.4 to 30.9)                    | -21.7<br>(-43.3 to 7.2)          | -42.8<br>(-57.3 to -24.3)   |
| Cameroon                   | 6,980<br>(5,020 to 9,590)       | 86.7<br>(62.3 to 115.8)                   | 43.9<br>(1.2 to 107.6)           | -24.3<br>(-41.9 to 0.3)     | 5,880<br>(4,090 to 8,450)       | 60.4<br>(44.0 to 82.7)                    | 31.1<br>(-12.0 to 94.8)          | -35.4<br>(-53.1 to -12.6)   |

|               | Male                          |                                           |                                  |                             | Female                        |                                           |                                  |                             |
|---------------|-------------------------------|-------------------------------------------|----------------------------------|-----------------------------|-------------------------------|-------------------------------------------|----------------------------------|-----------------------------|
|               | 2019                          |                                           | Percent change from 1990 to 2019 |                             | 2019                          |                                           | Percent change from 1990 to 2019 |                             |
|               | Number of attributable deaths | Attributable mortality rate (per 100,000) | Number of attributable deaths    | Attributable mortality rate | Number of attributable deaths | Attributable mortality rate (per 100,000) | Number of attributable deaths    | Attributable mortality rate |
| Chad          | 9,770<br>(7,030 to 13,100)    | 131.2<br>(103.7 to 163.2)                 | 55.5<br>(9.0 to 124.6)           | -25.4<br>(-43.8 to -2.2)    | 7,590<br>(5,330 to 10,500)    | 102.0<br>(77.1 to 129.8)                  | 43.1<br>(-2.6 to 107.5)          | -27.6<br>(-45.5 to -3.5)    |
| Côte d'Ivoire | 7,790<br>(5,640 to 10,400)    | 96.4<br>(71.6 to 125.3)                   | -6.2<br>(-32.6 to 30.3)          | -37.4<br>(-51.2 to -21.1)   | 5,990<br>(4,140 to 8,050)     | 66.8<br>(49.0 to 85.9)                    | -14.7<br>(-42.0 to 22.0)         | -40.2<br>(-54.7 to -22.5)   |
| Gambia        | 518<br>(402 to 655)           | 101.8<br>(76.3 to 131.3)                  | -13.3<br>(-37.8 to 20.0)         | -30.7<br>(-49.0 to -7.6)    | 405<br>(306 to 523)           | 68.9<br>(51.6 to 89.0)                    | -5.7<br>(-35.1 to 36.8)          | -28.5<br>(-48.6 to -1.8)    |
| Ghana         | 6,950<br>(5,300 to 8,650)     | 94.4<br>(72.7 to 118.1)                   | 27.8<br>(-11.2 to 74.0)          | -22.5<br>(-41.7 to 1.9)     | 3,730<br>(2,750 to 4,920)     | 36.8<br>(27.6 to 47.1)                    | -21.0<br>(-47.4 to 17.1)         | -53.2<br>(-66.2 to -35.3)   |
| Guinea        | 6,230<br>(4,570 to 8,400)     | 132.6<br>(98.9 to 172.2)                  | -22.3<br>(-46.1 to 12.6)         | -29.6<br>(-47.4 to -6.6)    | 5,110<br>(3,580 to 6,920)     | 101.2<br>(73.8 to 131.5)                  | -31.0<br>(-53.6 to -0.4)         | -43.3<br>(-58.3 to -24.8)   |
| Guinea-Bissau | 464<br>(353 to 609)           | 121.8<br>(92.9 to 156.1)                  | -45.4<br>(-62.5 to -20.6)        | -41.3<br>(-56.1 to -22.0)   | 388<br>(287 to 505)           | 79.9<br>(58.9 to 104.5)                   | -35.8<br>(-56.7 to -5.7)         | -39.0<br>(-56.1 to -15.6)   |
| Liberia       | 763<br>(558 to 1,020)         | 64.3<br>(47.6 to 83.9)                    | -63.0<br>(-74.1 to -47.2)        | -62.3<br>(-71.9 to -49.8)   | 700<br>(494 to 952)           | 57.0<br>(40.2 to 75.1)                    | -60.3<br>(-73.2 to -42.8)        | -62.0<br>(-72.9 to -49.3)   |
| Mali          | 6,270<br>(4,310 to 8,900)     | 56.3<br>(39.4 to 76.1)                    | 27.1<br>(-18.3 to 92.9)          | -37.3<br>(-55.7 to -12.9)   | 7,490<br>(5,260 to 9,950)     | 60.1<br>(43.6 to 77.7)                    | 57.7<br>(8.2 to 133.4)           | -29.9<br>(-48.4 to -5.0)    |



|                       | Male                          |                                           |                                  |                             | Female                        |                                           |                                  |                             |
|-----------------------|-------------------------------|-------------------------------------------|----------------------------------|-----------------------------|-------------------------------|-------------------------------------------|----------------------------------|-----------------------------|
|                       | 2019                          |                                           | Percent change from 1990 to 2019 |                             | 2019                          |                                           | Percent change from 1990 to 2019 |                             |
|                       | Number of attributable deaths | Attributable mortality rate (per 100,000) | Number of attributable deaths    | Attributable mortality rate | Number of attributable deaths | Attributable mortality rate (per 100,000) | Number of attributable deaths    | Attributable mortality rate |
| Mauritania            | 648<br>(453 to 905)           | 55.2<br>(40.5 to 73.7)                    | -35.1<br>(-54.8 to -5.7)         | -54.2<br>(-65.4 to -38.3)   | 593<br>(418 to 815)           | 50.2<br>(36.4 to 66.7)                    | -36.1<br>(-57.7 to -7.3)         | -49.6<br>(-64.3 to -31.4)   |
| Niger                 | 11,100<br>(7,660 to 15,400)   | 110.1<br>(81.7 to 142.7)                  | -14.3<br>(-47.3 to 40.3)         | -51.1<br>(-65.6 to -29.3)   | 10,400<br>(7,220 to 14,400)   | 95.8<br>(72.3 to 126.5)                   | -11.2<br>(-48.3 to 43.7)         | -52.6<br>(-66.8 to -33.8)   |
| Nigeria               | 81,200<br>(63,300 to 104,000) | 79.4<br>(62.8 to 99.4)                    | -4.2<br>(-30.7 to 38.7)          | -42.9<br>(-56.3 to -23.2)   | 70,300<br>(55,200 to 87,200)  | 67.5<br>(54.5 to 83.1)                    | -1.3<br>(-30.9 to 42.8)          | -42.4<br>(-57.6 to -19.4)   |
| Sao Tome and Principe | 33<br>(25 to 42)              | 65.7<br>(49.8 to 85.2)                    | -47.7<br>(-63.4 to -26.4)        | -45.1<br>(-58.8 to -27.7)   | 29<br>(21 to 39)              | 53.2<br>(37.9 to 73.8)                    | -51.4<br>(-66.9 to -30.7)        | -48.4<br>(-63.3 to -29.4)   |
| Senegal               | 2,720<br>(2,000 to 3,570)     | 59.5<br>(45.1 to 77.6)                    | -33.4<br>(-53.4 to -5.4)         | -45.7<br>(-59.5 to -29.2)   | 2,420<br>(1,750 to 3,190)     | 49.7<br>(37.3 to 64.8)                    | -30.7<br>(-51.9 to 0.5)          | -44.8<br>(-59.0 to -26.3)   |
| Sierra Leone          | 3,430<br>(2,430 to 4,700)     | 114.1<br>(84.7 to 149.0)                  | -21.7<br>(-47.7 to 13.9)         | -44.6<br>(-59.1 to -26.1)   | 2,860<br>(1,950 to 4,070)     | 90.0<br>(66.3 to 119.5)                   | -24.7<br>(-50.6 to 14.3)         | -44.3<br>(-59.9 to -22.7)   |
| Togo                  | 1,780<br>(1,320 to 2,390)     | 100.3<br>(77.7 to 127.4)                  | 1.1<br>(-26.7 to 39.2)           | -24.3<br>(-40.1 to -5.6)    | 1,520<br>(1,110 to 2,000)     | 63.8<br>(46.1 to 84.5)                    | -9.0<br>(-37.0 to 34.7)          | -39.4<br>(-53.5 to -21.0)   |

**Appendix Table 5. Lower respiratory infection mortality attributable to all evaluated risk factors combined in 2019 and the percent change in attributable mortality between 1990 and 2019 by age, sex, and GBD super-regions (95% UI)**

|                                     |             | Male                            |                                                  |                                  |                                                  | Female                          |                                                  |                                  |                                                  |
|-------------------------------------|-------------|---------------------------------|--------------------------------------------------|----------------------------------|--------------------------------------------------|---------------------------------|--------------------------------------------------|----------------------------------|--------------------------------------------------|
|                                     |             | 2019                            |                                                  | Percent change from 1990 to 2019 |                                                  | 2019                            |                                                  | Percent change from 1990 to 2019 |                                                  |
|                                     | Age Group   | Number of attributable deaths   | Attributable mortality rate (per 100 000 people) | Number of attributable deaths    | Attributable mortality rate (per 100 000 people) | Number of attributable deaths   | Attributable mortality rate (per 100 000 people) | Number of attributable deaths    | Attributable mortality rate (per 100 000 people) |
| Global                              | 0-4 years   | 319,000<br>(256,000 to 401,000) | 93.0<br>(74.8 to 117.1)                          | -71.0<br>(-77.5 to -62.3)        | -72.4<br>(-78.6 to -64.1)                        | 310,000<br>(254,000 to 378,000) | 96.7<br>(79.2 to 117.8)                          | -68.7<br>(-76.1 to -60.1)        | -70.0<br>(-77.2 to -61.9)                        |
|                                     | 5-14 years  | 12,500<br>(9,960 to 15,500)     | 1.9<br>(1.5 to 2.3)                              | -51.2<br>(-59.8 to -38.0)        | -58.0<br>(-65.5 to -46.7)                        | 11,800<br>(9,010 to 14,900)     | 1.9<br>(1.4 to 2.4)                              | -55.6<br>(-64.6 to -45.9)        | -61.3<br>(-69.2 to -52.9)                        |
|                                     | 15-49 years | 64,700<br>(55,700 to 74,200)    | 3.3<br>(2.8 to 3.7)                              | 13.9<br>(0.7 to 28.8)            | -21.4<br>(-30.5 to -11.0)                        | 36,600<br>(29,800 to 44,000)    | 1.9<br>(1.5 to 2.3)                              | -9.1<br>(-21.8 to 4.9)           | -37.5<br>(-46.2 to -27.9)                        |
|                                     | 50-69 years | 149,000<br>(129,000 to 168,000) | 22.0<br>(19.1 to 24.8)                           | 29.3<br>(14.6 to 44.3)           | -35.7<br>(-43.0 to -28.2)                        | 84,700<br>(69,400 to 100,000)   | 12.1<br>(9.9 to 14.3)                            | 25.4<br>(8.6 to 45.7)            | -38.3<br>(-46.6 to -28.4)                        |
|                                     | 70+ years   | 331,000<br>(287,000 to 375,000) | 162.9<br>(141.3 to 184.6)                        | 66.6<br>(50.4 to 82.8)           | -32.7<br>(-39.2 to -26.1)                        | 282,000<br>(230,000 to 334,000) | 108.4<br>(88.6 to 128.4)                         | 54.1<br>(37.6 to 70.5)           | -29.3<br>(-36.9 to -21.8)                        |
| Central Europe, Eastern Europe, and | 0-4 years   | 6,710<br>(5,370 to 8,420)       | 47.2<br>(37.8 to 59.3)                           | -78.6<br>(-83.2 to -72.8)        | -72.7<br>(-78.5 to -65.2)                        | 5,340<br>(4,300 to 6,660)       | 39.9<br>(32.2 to 49.9)                           | -78.7<br>(-83.0 to -73.2)        | -72.2<br>(-77.7 to -65.0)                        |
|                                     | 5-14 years  | 360<br>(288 to 440)             | 1.3<br>(1.0 to 1.6)                              | -50.8<br>(-58.4 to -41.8)        | -37.4<br>(-47.0 to -25.8)                        | 297<br>(241 to 363)             | 1.1<br>(0.9 to 1.4)                              | -54.9<br>(-61.3 to -46.2)        | -41.0<br>(-49.4 to -29.6)                        |

|                             |             |                               |                           |                           |                           |                              |                          |                           |                           |
|-----------------------------|-------------|-------------------------------|---------------------------|---------------------------|---------------------------|------------------------------|--------------------------|---------------------------|---------------------------|
| Central Asia                | 15-49 years | 8,680<br>(7,280 to 10,000)    | 8.7<br>(7.3 to 10.0)      | 77.9<br>(55.8 to 99.8)    | 81.8<br>(59.3 to 104.2)   | 2,300<br>(1,850 to 2,780)    | 2.3<br>(1.9 to 2.8)      | 36.7<br>(17.0 to 58.7)    | 40.7<br>(20.3 to 63.2)    |
|                             | 50-69 years | 13,800<br>(11,700 to 15,900)  | 31.0<br>(26.3 to 35.6)    | 63.0<br>(43.9 to 82.0)    | 32.8<br>(17.2 to 48.3)    | 3,280<br>(2,680 to 3,860)    | 6.0<br>(4.9 to 7.1)      | 22.3<br>(7.7 to 36.4)     | 5.5<br>(-7.1 to 17.6)     |
|                             | 70+ years   | 10,800<br>(9,130 to 12,300)   | 84.8<br>(71.8 to 96.3)    | 51.6<br>(35.6 to 65.9)    | -10.0<br>(-19.4 to -1.4)  | 8,450<br>(6,590 to 10,300)   | 34.4<br>(26.9 to 42.1)   | 14.4<br>(1.9 to 26.6)     | -17.6<br>(-26.6 to -8.8)  |
| High-income                 | 0-4 years   | 644<br>(500 to 796)           | 2.2<br>(1.7 to 2.7)       | -76.1<br>(-80.4 to -71.3) | -74.2<br>(-78.8 to -69.0) | 495<br>(388 to 600)          | 1.8<br>(1.4 to 2.2)      | -76.8<br>(-80.6 to -72.9) | -75.0<br>(-79.1 to -70.8) |
|                             | 5-14 years  | 56<br>(46 to 68)              | 0.1<br>(0.1 to 0.1)       | -72.1<br>(-75.4 to -67.2) | -71.2<br>(-74.6 to -66.2) | 57<br>(46 to 68)             | 0.1<br>(0.1 to 0.1)      | -70.1<br>(-73.9 to -62.2) | -69.2<br>(-73.0 to -60.9) |
|                             | 15-49 years | 2,540<br>(2,240 to 2,790)     | 1.0<br>(0.9 to 1.1)       | -38.4<br>(-41.8 to -34.7) | -40.6<br>(-43.9 to -37.0) | 1,430<br>(1,240 to 1,600)    | 0.6<br>(0.5 to 0.7)      | -27.2<br>(-31.6 to -22.5) | -29.3<br>(-33.7 to -24.8) |
|                             | 50-69 years | 14,200<br>(12,700 to 15,600)  | 10.6<br>(9.5 to 11.7)     | -3.8<br>(-8.8 to 1.3)     | -40.0<br>(-43.1 to -36.8) | 6,640<br>(5,830 to 7,440)    | 4.8<br>(4.2 to 5.3)      | 2.8<br>(-3.4 to 8.6)      | -32.3<br>(-36.3 to -28.4) |
|                             | 70+ years   | 88,400<br>(75,000 to 100,000) | 141.7<br>(120.1 to 160.9) | 38.4<br>(27.4 to 46.7)    | -36.7<br>(-41.7 to -32.9) | 72,400<br>(56,000 to 86,800) | 86.8<br>(67.1 to 104.0)  | 27.0<br>(13.3 to 37.9)    | -27.7<br>(-35.5 to -21.5) |
| Latin America and Caribbean | 0-4 years   | 8,820<br>(6,570 to 11,600)    | 36.0<br>(26.8 to 47.3)    | -81.2<br>(-86.6 to -75.0) | -80.5<br>(-86.1 to -74.1) | 6,900<br>(5,230 to 8,810)    | 29.3<br>(22.2 to 37.4)   | -82.6<br>(-87.3 to -77.3) | -81.8<br>(-86.7 to -76.2) |
|                             | 5-14 years  | 324<br>(238 to 419)           | 0.7<br>(0.5 to 0.8)       | -73.7<br>(-79.1 to -67.8) | -74.6<br>(-79.8 to -68.9) | 308<br>(230 to 398)          | 0.6<br>(0.5 to 0.8)      | -74.2<br>(-78.7 to -69.1) | -74.5<br>(-79.0 to -69.5) |
|                             | 15-49 years | 4,660<br>(3,860 to 5,500)     | 3.1<br>(2.5 to 3.6)       | -7.6<br>(-18.3 to 4.7)    | -41.2<br>(-48.0 to -33.4) | 2,140<br>(1,720 to 2,640)    | 1.4<br>(1.1 to 1.7)      | -26.8<br>(-37.6 to -14.8) | -53.0<br>(-59.9 to -45.3) |
|                             | 50-69 years | 9,730<br>(8,150 to 11,300)    | 20.8<br>(17.5 to 24.3)    | 41.8<br>(25.9 to 60.4)    | -43.9<br>(-50.2 to -36.5) | 5,240<br>(4,290 to 6,250)    | 10.0<br>(8.2 to 12.0)    | 35.4<br>(18.3 to 52.7)    | -49.2<br>(-55.6 to -42.7) |
|                             | 70+ years   | 21,600<br>(17,400 to 25,800)  | 150.0<br>(120.6 to 179.4) | 78.6<br>(59.4 to 99.3)    | -37.4<br>(-44.2 to -30.2) | 19,700<br>(15,200 to 24,000) | 108.1<br>(83.3 to 131.6) | 81.1<br>(59.7 to 103.7)   | -41.6<br>(-48.5 to -34.3) |

|                                        |             |                               |                           |                           |                           |                               |                           |                           |                           |
|----------------------------------------|-------------|-------------------------------|---------------------------|---------------------------|---------------------------|-------------------------------|---------------------------|---------------------------|---------------------------|
| North Africa and Middle East           | 0-4 years   | 14,100<br>(10,800 to 18,200)  | 46.1<br>(35.2 to 59.2)    | -80.3<br>(-86.6 to -72.7) | -82.4<br>(-88.0 to -75.7) | 14,200<br>(11,000 to 17,700)  | 49.0<br>(37.8 to 60.9)    | -80.0<br>(-85.6 to -73.6) | -82.1<br>(-87.1 to -76.4) |
|                                        | 5-14 years  | 949<br>(694 to 1,250)         | 1.6<br>(1.2 to 2.1)       | -49.2<br>(-65.1 to -33.4) | -60.7<br>(-73.0 to -48.4) | 870<br>(566 to 1,150)         | 1.5<br>(1.0 to 2.0)       | -53.0<br>(-64.9 to -38.7) | -63.2<br>(-72.5 to -52.0) |
|                                        | 15-49 years | 3,860<br>(3,090 to 4,810)     | 2.2<br>(1.8 to 2.8)       | 60.2<br>(32.5 to 92.9)    | -23.7<br>(-36.9 to -8.1)  | 2,540<br>(1,890 to 3,270)     | 1.6<br>(1.2 to 2.1)       | 25.2<br>(-0.0 to 54.4)    | -37.6<br>(-50.2 to -23.1) |
|                                        | 50-69 years | 7,510<br>(6,010 to 9,140)     | 18.3<br>(14.6 to 22.3)    | 74.6<br>(43.6 to 116.4)   | -31.5<br>(-43.7 to -15.1) | 3,890<br>(2,890 to 4,990)     | 10.1<br>(7.5 to 12.9)     | 57.6<br>(26.4 to 110.7)   | -37.6<br>(-49.9 to -16.5) |
|                                        | 70+ years   | 13,200<br>(11,000 to 15,800)  | 136.1<br>(112.9 to 162.6) | 112.3<br>(81.8 to 158.1)  | -20.1<br>(-31.6 to -2.9)  | 8,980<br>(7,280 to 11,000)    | 91.8<br>(74.4 to 112.4)   | 94.4<br>(61.8 to 155.5)   | -24.1<br>(-36.9 to -0.3)  |
| South Asia                             | 0-4 years   | 83,900<br>(66,100 to 105,000) | 97.9<br>(77.1 to 122.9)   | -76.5<br>(-82.6 to -67.7) | -77.0<br>(-83.0 to -68.4) | 98,500<br>(79,200 to 121,000) | 125.2<br>(100.7 to 154.2) | -70.5<br>(-78.7 to -61.1) | -70.8<br>(-78.9 to -61.5) |
|                                        | 5-14 years  | 3,940<br>(2,870 to 5,170)     | 2.2<br>(1.6 to 2.8)       | -54.1<br>(-64.6 to -38.4) | -63.9<br>(-72.2 to -51.6) | 4,450<br>(3,100 to 5,800)     | 2.6<br>(1.8 to 3.4)       | -63.7<br>(-72.6 to -52.9) | -71.4<br>(-78.4 to -63.0) |
|                                        | 15-49 years | 11,000<br>(8,700 to 13,700)   | 2.2<br>(1.8 to 2.7)       | 7.6<br>(-15.6 to 34.9)    | -40.6<br>(-53.4 to -25.5) | 9,180<br>(6,910 to 11,600)    | 1.9<br>(1.4 to 2.4)       | -5.7<br>(-29.1 to 22.5)   | -49.7<br>(-62.1 to -34.6) |
|                                        | 50-69 years | 33,400<br>(26,000 to 41,000)  | 27.2<br>(21.2 to 33.4)    | 27.3<br>(-1.0 to 60.2)    | -40.9<br>(-54.0 to -25.6) | 30,200<br>(22,600 to 38,900)  | 24.7<br>(18.4 to 31.8)    | 47.4<br>(8.1 to 99.1)     | -39.3<br>(-55.5 to -18.0) |
|                                        | 70+ years   | 67,300<br>(54,000 to 82,400)  | 203.9<br>(163.6 to 249.5) | 103.1<br>(60.5 to 155.6)  | -31.1<br>(-45.6 to -13.3) | 65,700<br>(49,000 to 83,800)  | 182.1<br>(135.8 to 232.1) | 136.3<br>(72.4 to 218.9)  | -30.0<br>(-48.9 to -5.5)  |
| Southeast Asia, East Asia, and Oceania | 0-4 years   | 27,100<br>(22,700 to 32,000)  | 36.5<br>(30.5 to 43.1)    | -90.7<br>(-92.8 to -88.3) | -88.2<br>(-90.9 to -85.1) | 20,800<br>(17,600 to 24,400)  | 31.3<br>(26.5 to 36.8)    | -92.0<br>(-93.7 to -89.8) | -89.6<br>(-91.8 to -86.8) |
|                                        | 5-14 years  | 965<br>(751 to 1,240)         | 0.7<br>(0.5 to 0.9)       | -85.4<br>(-88.3 to -75.0) | -82.4<br>(-85.8 to -69.8) | 737<br>(563 to 964)           | 0.6<br>(0.4 to 0.8)       | -85.8<br>(-88.8 to -78.9) | -81.9<br>(-85.7 to -73.1) |

|                    |             |                                 |                           |                           |                           |                                 |                           |                           |                           |
|--------------------|-------------|---------------------------------|---------------------------|---------------------------|---------------------------|---------------------------------|---------------------------|---------------------------|---------------------------|
|                    | 15-49 years | 9,700<br>(8,060 to 11,600)      | 1.7<br>(1.4 to 2.0)       | -33.2<br>(-45.5 to -10.9) | -44.3<br>(-54.5 to -25.7) | 3,910<br>(3,040 to 4,960)       | 0.7<br>(0.6 to 0.9)       | -56.0<br>(-65.3 to -44.3) | -63.3<br>(-71.1 to -53.6) |
|                    | 50-69 years | 31,200<br>(26,400 to 36,600)    | 12.7<br>(10.7 to 14.8)    | 20.1<br>(-0.9 to 46.8)    | -48.5<br>(-57.6 to -37.1) | 11,500<br>(9,020 to 14,300)     | 4.6<br>(3.6 to 5.7)       | -23.1<br>(-37.5 to -4.6)  | -68.7<br>(-74.5 to -61.1) |
|                    | 70+ years   | 82,500<br>(69,800 to 95,600)    | 131.9<br>(111.7 to 152.9) | 77.7<br>(49.9 to 116.3)   | -37.8<br>(-47.5 to -24.3) | 62,600<br>(49,200 to 78,100)    | 80.8<br>(63.4 to 100.7)   | 24.3<br>(3.2 to 51.1)     | -53.9<br>(-61.7 to -43.9) |
| Sub-Saharan Africa | 0-4 years   | 177,000<br>(135,000 to 230,000) | 211.4<br>(160.9 to 274.5) | -40.8<br>(-55.6 to -18.1) | -68.2<br>(-76.1 to -55.9) | 164,000<br>(128,000 to 208,000) | 199.9<br>(156.2 to 254.5) | -36.1<br>(-53.4 to -15.2) | -65.2<br>(-74.7 to -53.9) |
|                    | 5-14 years  | 5,860<br>(4,380 to 7,690)       | 4.0<br>(3.0 to 5.3)       | -6.9<br>(-29.6 to 31.2)   | -57.0<br>(-67.5 to -39.4) | 5,120<br>(3,670 to 6,800)       | 3.6<br>(2.5 to 4.7)       | -4.1<br>(-29.4 to 28.1)   | -55.1<br>(-66.9 to -40.0) |
|                    | 15-49 years | 24,300<br>(19,400 to 30,100)    | 9.6<br>(7.7 to 11.9)      | 55.2<br>(26.9 to 85.7)    | -34.4<br>(-46.4 to -21.5) | 15,100<br>(11,400 to 19,300)    | 5.7<br>(4.3 to 7.3)       | 15.7<br>(-7.7 to 42.7)    | -51.3<br>(-61.1 to -39.9) |
|                    | 50-69 years | 38,900<br>(31,400 to 46,800)    | 95.9<br>(77.4 to 115.3)   | 36.7<br>(13.5 to 63.4)    | -34.4<br>(-45.5 to -21.5) | 24,000<br>(18,300 to 29,800)    | 53.9<br>(41.2 to 67.0)    | 44.4<br>(18.4 to 78.4)    | -38.5<br>(-49.6 to -24.1) |
|                    | 70+ years   | 47,500<br>(39,600 to 55,800)    | 552.4<br>(461.0 to 649.0) | 58.5<br>(35.0 to 83.2)    | -20.6<br>(-32.4 to -8.2)  | 44,300<br>(35,100 to 53,300)    | 415.9<br>(329.6 to 500.8) | 77.1<br>(50.8 to 106.3)   | -16.9<br>(-29.2 to -3.2)  |



Appendix Table 6. Lower respiratory infection age-standardized risk-deleted mortality rate (per 100,000 people) for all evaluated risk factors combined by sex for 204 countries and territories and 21 GBD regions for 1990 and 2019 (95% UI)

|                                                         | 1990                       |                            |                            | 2019                       |                            |                            |
|---------------------------------------------------------|----------------------------|----------------------------|----------------------------|----------------------------|----------------------------|----------------------------|
|                                                         | Male                       | Female                     | Male to female ratio       | Male                       | Female                     | Male to female ratio       |
| <b>Global</b>                                           | <b>15·6</b><br>(13·0–18·3) | <b>13·4</b><br>(11·2–15·7) | <b>1·17</b><br>(1·07–1·28) | <b>13·5</b><br>(11·4–15·7) | <b>11·1</b><br>(9·24–12·7) | <b>1·22</b><br>(1·12–1·36) |
| <b>Central Europe, Eastern Europe, and Central Asia</b> | <b>9·29</b><br>(7·57–11·1) | <b>7·02</b><br>(5·82–8·32) | <b>1·32</b><br>(1·24–1·42) | <b>9·58</b><br>(7·85–11·5) | <b>5·93</b><br>(4·90–6·95) | <b>1·62</b><br>(1·43–1·83) |
| Central Asia                                            | 12·7<br>(9·77–16·2)        | 10·7<br>(8·41–13·3)        | 1·19<br>(1·12–1·26)        | 11·5<br>(9·50–13·7)        | 9·36<br>(7·80–11·1)        | 1·23<br>(1·13–1·35)        |
| Armenia                                                 | 7·28<br>(5·19–9·61)        | 6·38<br>(4·62–8·31)        | 1·14<br>(1·05–1·25)        | 6·27<br>(4·67–8·02)        | 5·84<br>(4·31–7·27)        | 1·08<br>(0·941–1·24)       |
| Azerbaijan                                              | 16·2<br>(12·1–21·9)        | 14·9<br>(10·7–20·2)        | 1·10<br>(0·971–1·21)       | 9·88<br>(7·50–12·8)        | 11·2<br>(8·45–15·1)        | 0·895<br>(0·675–1·15)      |
| Georgia                                                 | 10·9<br>(8·28–13·6)        | 9·43<br>(7·19–11·8)        | 1·15<br>(1·06–1·25)        | 6·63<br>(5·05–8·21)        | 4·82<br>(3·72–5·96)        | 1·38<br>(1·21–1·58)        |
| Kazakhstan                                              | 10·5<br>(8·02–13·1)        | 7·75<br>(5·96–9·64)        | 1·35<br>(1·24–1·47)        | 13·3<br>(10·7–16·3)        | 8·92<br>(7·23–10·6)        | 1·49<br>(1·31–1·70)        |
| Kyrgyzstan                                              | 13·6<br>(9·52–17·9)        | 11·0<br>(7·82–14·1)        | 1·24<br>(1·15–1·34)        | 5·07<br>(3·64–6·53)        | 3·79<br>(2·77–4·86)        | 1·34<br>(1·20–1·49)        |
| Mongolia                                                | 23·4<br>(14·6–32·7)        | 17·3<br>(10·9–24·4)        | 1·36<br>(1·14–1·64)        | 6·82<br>(4·72–9·29)        | 5·02<br>(3·41–7·20)        | 1·37<br>(1·10–1·64)        |
| Tajikistan                                              | 13·2<br>(9·16–17·9)        | 13·4<br>(9·55–17·9)        | 0·982<br>(0·851–1·14)      | 15·0<br>(10·9–20·7)        | 13·2<br>(9·27–18·9)        | 1·15<br>(0·908–1·38)       |
| Turkmenistan                                            | 18·8<br>(14·3–24·8)        | 17·2<br>(13·3–21·9)        | 1·09<br>(1·01–1·18)        | 8·62<br>(6·68–11·1)        | 6·33<br>(4·86–8·13)        | 1·36<br>(1·25–1·51)        |
| Uzbekistan                                              | 12·1<br>(9·24–15·6)        | 10·2<br>(7·93–12·7)        | 1·19<br>(1·10–1·28)        | 14·7<br>(12·0–18·1)        | 12·4<br>(10·1–15·0)        | 1·19<br>(1·10–1·29)        |
| Central Europe                                          | 9·30<br>(7·42–11·2)        | 7·86<br>(6·36–9·30)        | 1·18<br>(1·09–1·29)        | 8·15<br>(6·59–9·84)        | 5·62<br>(4·56–6·64)        | 1·45<br>(1·26–1·66)        |
| Albania                                                 | 19·8<br>(10·6–25·2)        | 15·2<br>(7·74–19·8)        | 1·33<br>(1·08–2·28)        | 5·39<br>(3·93–7·30)        | 4·93<br>(3·71–6·65)        | 1·10<br>(0·857–1·38)       |

|                        | 1990                |                     |                       | 2019                |                     |                      |
|------------------------|---------------------|---------------------|-----------------------|---------------------|---------------------|----------------------|
|                        | Male                | Female              | Male to female ratio  | Male                | Female              | Male to female ratio |
| Bosnia and Herzegovina | 5.09<br>(3.70–6.57) | 4.55<br>(3.24–5.77) | 1.12<br>(0.939–1.42)  | 3.21<br>(2.32–4.22) | 2.82<br>(2.03–4.41) | 1.16<br>(0.775–1.42) |
| Bulgaria               | 16.1<br>(12.9–19.6) | 13.5<br>(11.1–16.0) | 1.19<br>(1.06–1.33)   | 7.73<br>(6.01–9.69) | 5.30<br>(4.12–6.65) | 1.46<br>(1.31–1.65)  |
| Croatia                | 6.41<br>(5.00–7.97) | 5.29<br>(4.18–6.42) | 1.21<br>(1.06–1.38)   | 3.64<br>(2.78–4.69) | 2.38<br>(1.82–3.03) | 1.53<br>(1.34–1.73)  |
| Czechia                | 7.93<br>(6.25–9.74) | 7.06<br>(5.57–8.44) | 1.12<br>(1.01–1.23)   | 8.48<br>(6.49–10.7) | 6.46<br>(4.97–8.00) | 1.32<br>(1.19–1.46)  |
| Hungary                | 4.21<br>(3.31–5.23) | 3.35<br>(2.64–4.13) | 1.26<br>(1.14–1.38)   | 3.37<br>(2.58–4.22) | 2.53<br>(1.96–3.16) | 1.34<br>(1.20–1.49)  |
| Montenegro             | 3.73<br>(2.81–4.79) | 2.73<br>(2.00–3.52) | 1.37<br>(1.06–1.73)   | 3.82<br>(2.84–4.96) | 2.64<br>(2.02–3.52) | 1.46<br>(1.12–1.80)  |
| North Macedonia        | 4.62<br>(3.41–6.17) | 5.16<br>(3.83–6.74) | 0.899<br>(0.736–1.08) | 3.31<br>(2.44–4.46) | 3.16<br>(2.33–4.66) | 1.06<br>(0.750–1.33) |
| Poland                 | 6.83<br>(5.34–8.46) | 5.61<br>(4.46–6.75) | 1.22<br>(1.11–1.34)   | 9.89<br>(7.49–12.9) | 6.09<br>(4.55–7.74) | 1.64<br>(1.23–2.15)  |
| Romania                | 13.3<br>(10.5–16.5) | 11.2<br>(8.79–13.8) | 1.19<br>(1.09–1.29)   | 10.4<br>(8.06–13.0) | 6.96<br>(5.58–8.56) | 1.49<br>(1.34–1.66)  |
| Serbia                 | 4.57<br>(3.44–5.95) | 4.24<br>(3.20–5.50) | 1.08<br>(0.864–1.34)  | 5.14<br>(3.82–6.60) | 4.29<br>(3.23–5.43) | 1.21<br>(0.969–1.50) |
| Slovakia               | 21.2<br>(15.2–26.8) | 19.1<br>(11.8–23.9) | 1.12<br>(0.911–1.69)  | 12.3<br>(9.00–16.4) | 9.37<br>(7.02–12.4) | 1.32<br>(1.04–1.62)  |
| Slovenia               | 11.0<br>(8.05–14.2) | 9.00<br>(6.71–11.6) | 1.22<br>(1.09–1.35)   | 9.36<br>(6.97–12.0) | 5.60<br>(4.11–7.26) | 1.68<br>(1.46–1.92)  |
| Eastern Europe         | 6.60<br>(5.26–8.11) | 4.47<br>(3.59–5.39) | 1.48<br>(1.34–1.63)   | 8.76<br>(6.76–11.2) | 4.49<br>(3.52–5.59) | 1.96<br>(1.57–2.42)  |
| Belarus                | 4.86<br>(3.63–5.97) | 4.03<br>(3.11–4.84) | 1.21<br>(1.08–1.34)   | 4.66<br>(3.45–6.07) | 2.50<br>(1.89–3.18) | 1.87<br>(1.58–2.20)  |
| Estonia                | 6.81<br>(5.01–8.41) | 4.06<br>(3.03–4.87) | 1.68<br>(1.49–1.87)   | 5.80<br>(4.08–7.76) | 3.30<br>(2.38–4.36) | 1.76<br>(1.52–2.01)  |



|                           | 1990                              |                                   |                                   | 2019                              |                                   |                                   |
|---------------------------|-----------------------------------|-----------------------------------|-----------------------------------|-----------------------------------|-----------------------------------|-----------------------------------|
|                           | Male                              | Female                            | Male to female ratio              | Male                              | Female                            | Male to female ratio              |
| Latvia                    | 6·01<br>(4·53–7·39)               | 3·99<br>(3·10–4·76)               | 1·51<br>(1·35–1·68)               | 6·14<br>(4·46–8·03)               | 3·67<br>(2·72–4·85)               | 1·69<br>(1·22–2·26)               |
| Lithuania                 | 4·61<br>(3·53–5·66)               | 3·37<br>(2·67–4·03)               | 1·37<br>(1·20–1·53)               | 6·56<br>(4·92–8·39)               | 3·54<br>(2·72–4·45)               | 1·85<br>(1·61–2·12)               |
| Republic of Moldova       | 8·73<br>(6·68–11·2)               | 6·13<br>(4·73–7·81)               | 1·42<br>(1·28–1·57)               | 9·13<br>(7·27–11·3)               | 4·49<br>(3·68–5·46)               | 2·04<br>(1·73–2·34)               |
| Russian Federation        | 7·43<br>(5·84–9·41)               | 4·81<br>(3·77–5·95)               | 1·55<br>(1·39–1·70)               | 9·27<br>(6·83–12·3)               | 4·90<br>(3·68–6·36)               | 1·90<br>(1·45–2·45)               |
| Ukraine                   | 4·96<br>(3·97–5·95)               | 3·58<br>(2·98–4·19)               | 1·39<br>(1·23–1·55)               | 8·42<br>(6·44–10·9)               | 3·78<br>(2·94–4·74)               | 2·25<br>(1·66–3·01)               |
| <b>High-income</b>        | <b>14·3</b><br><b>(12·2–16·5)</b> | <b>10·7</b><br><b>(8·93–12·1)</b> | <b>1·34</b><br><b>(1·26–1·44)</b> | <b>11·4</b><br><b>(9·62–13·1)</b> | <b>8·03</b><br><b>(6·42–9·13)</b> | <b>1·43</b><br><b>(1·34–1·54)</b> |
| Australasia               | 8·72<br>(7·42–10·0)               | 6·86<br>(5·71–7·77)               | 1·27<br>(1·18–1·38)               | 6·17<br>(5·11–7·10)               | 5·49<br>(4·24–6·40)               | 1·13<br>(1·03–1·25)               |
| Australia                 | 7·06<br>(6·08–8·15)               | 5·35<br>(4·44–6·05)               | 1·32<br>(1·21–1·44)               | 6·15<br>(5·07–7·13)               | 5·46<br>(4·21–6·39)               | 1·13<br>(1·03–1·26)               |
| New Zealand               | 16·3<br>(13·5–19·6)               | 14·2<br>(11·3–16·8)               | 1·15<br>(1·04–1·26)               | 6·24<br>(5·08–7·49)               | 5·66<br>(4·34–6·74)               | 1·11<br>(1·02–1·22)               |
| High-income Asia Pacific  | 26·4<br>(22·0–31·0)               | 17·8<br>(14·7–20·0)               | 1·49<br>(1·33–1·65)               | 18·0<br>(14·5–21·0)               | 8·90<br>(6·57–10·5)               | 2·04<br>(1·82–2·32)               |
| Brunei Darussalam         | 42·1<br>(31·4–57·2)               | 22·6<br>(16·8–35·5)               | 1·89<br>(1·19–2·43)               | 61·5<br>(50·0–73·2)               | 32·9<br>(25·5–38·9)               | 1·88<br>(1·51–2·39)               |
| Japan                     | 27·1<br>(22·6–31·8)               | 18·2<br>(15·1–20·5)               | 1·49<br>(1·33–1·66)               | 18·5<br>(14·9–21·6)               | 8·73<br>(6·34–10·3)               | 2·14<br>(1·91–2·46)               |
| Republic of Korea         | 10·8<br>(8·50–14·0)               | 9·52<br>(7·72–12·4)               | 1·14<br>(0·903–1·38)              | 11·9<br>(6·86–15·2)               | 8·18<br>(4·41–10·4)               | 1·50<br>(1·16–2·75)               |
| Singapore                 | 59·0<br>(36·1–69·9)               | 49·2<br>(28·8–57·6)               | 1·20<br>(1·10–1·30)               | 46·5<br>(36·5–53·6)               | 31·9<br>(22·9–37·2)               | 1·46<br>(1·33–1·63)               |
| High-income North America | 13·6<br>(11·7–15·7)               | 9·37<br>(7·77–10·7)               | 1·46<br>(1·35–1·57)               | 8·67<br>(7·49–9·76)               | 7·08<br>(5·94–7·96)               | 1·23<br>(1·15–1·31)               |

|                          | 1990                |                     |                        | 2019                |                     |                        |
|--------------------------|---------------------|---------------------|------------------------|---------------------|---------------------|------------------------|
|                          | Male                | Female              | Male to female ratio   | Male                | Female              | Male to female ratio   |
| Canada                   | 12.3<br>(8.93–16.3) | 9.02<br>(6.41–11.9) | 1.37<br>(1.24–1.52)    | 7.31<br>(5.41–9.66) | 6.26<br>(4.40–8.29) | 1.17<br>(1.07–1.29)    |
| United States of America | 13.8<br>(11.8–15.8) | 9.42<br>(7.85–10.8) | 1.46<br>(1.36–1.59)    | 8.84<br>(7.67–9.88) | 7.18<br>(6.05–8.03) | 1.23<br>(1.16–1.31)    |
| Southern Latin America   | 18.9<br>(15.5–22.3) | 13.6<br>(11.2–15.9) | 1.39<br>(1.30–1.49)    | 30.1<br>(25.6–35.4) | 24.1<br>(19.8–28.0) | 1.25<br>(1.14–1.38)    |
| Argentina                | 14.0<br>(11.5–16.9) | 9.83<br>(8.03–11.6) | 1.43<br>(1.30–1.58)    | 40.1<br>(34.0–47.2) | 31.0<br>(25.5–36.2) | 1.30<br>(1.18–1.44)    |
| Chile                    | 35.9<br>(28.7–42.8) | 31.2<br>(24.8–37.2) | 1.15<br>(1.07–1.25)    | 11.8<br>(9.27–14.3) | 10.0<br>(7.50–12.2) | 1.18<br>(1.08–1.29)    |
| Uruguay                  | 13.7<br>(11.9–15.7) | 10.9<br>(9.29–12.4) | 1.25<br>(1.17–1.35)    | 16.8<br>(14.3–19.5) | 14.4<br>(11.9–16.5) | 1.17<br>(1.08–1.27)    |
| Western Europe           | 11.0<br>(9.14–13.1) | 9.56<br>(7.80–11.1) | 1.16<br>(1.07–1.24)    | 8.49<br>(7.13–9.88) | 6.72<br>(5.39–7.74) | 1.26<br>(1.18–1.37)    |
| Andorra                  | 8.17<br>(5.30–11.5) | 8.67<br>(5.45–12.5) | 0.954<br>(0.691–1.26)  | 6.77<br>(4.77–9.04) | 7.44<br>(4.79–10.4) | 0.923<br>(0.701–1.19)  |
| Austria                  | 6.14<br>(4.83–7.45) | 5.10<br>(3.99–6.05) | 1.20<br>(1.09–1.33)    | 3.24<br>(2.55–3.93) | 2.54<br>(1.95–3.09) | 1.28<br>(1.14–1.42)    |
| Belgium                  | 12.1<br>(9.42–14.9) | 8.22<br>(6.35–9.86) | 1.47<br>(1.32–1.63)    | 12.2<br>(9.88–14.8) | 9.53<br>(7.38–11.3) | 1.29<br>(1.16–1.42)    |
| Cyprus                   | 12.4<br>(9.37–15.4) | 22.0<br>(16.7–27.2) | 0.570<br>(0.436–0.758) | 5.96<br>(4.58–7.45) | 7.92<br>(6.33–10.6) | 0.758<br>(0.572–0.929) |
| Denmark                  | 8.97<br>(6.96–11.1) | 7.93<br>(6.05–9.84) | 1.13<br>(1.01–1.26)    | 10.3<br>(7.98–12.7) | 8.07<br>(6.20–9.94) | 1.28<br>(1.15–1.42)    |
| Finland                  | 28.7<br>(20.9–35.1) | 19.9<br>(14.3–24.2) | 1.44<br>(1.31–1.58)    | 4.07<br>(3.03–5.04) | 2.78<br>(2.03–3.45) | 1.46<br>(1.34–1.62)    |
| France                   | 10.9<br>(8.74–13.1) | 8.65<br>(6.83–10.2) | 1.26<br>(1.11–1.41)    | 7.52<br>(6.03–9.04) | 5.68<br>(4.29–6.86) | 1.33<br>(1.20–1.50)    |
| Germany                  | 7.39<br>(5.88–9.18) | 5.47<br>(4.31–6.65) | 1.35<br>(1.21–1.51)    | 6.69<br>(5.39–8.02) | 4.71<br>(3.74–5.61) | 1.42<br>(1.29–1.58)    |

|             | 1990                |                     |                        | 2019                |                     |                        |
|-------------|---------------------|---------------------|------------------------|---------------------|---------------------|------------------------|
|             | Male                | Female              | Male to female ratio   | Male                | Female              | Male to female ratio   |
| Greece      | 5·71<br>(4·63–6·85) | 6·73<br>(5·64–7·71) | 0·850<br>(0·744–0·964) | 8·69<br>(7·09–10·4) | 10·8<br>(8·89–12·4) | 0·803<br>(0·708–0·902) |
| Iceland     | 14·5<br>(10·5–18·4) | 18·0<br>(12·7–22·9) | 0·809<br>(0·702–0·923) | 9·33<br>(6·60–12·0) | 7·41<br>(5·03–9·82) | 1·27<br>(1·11–1·45)    |
| Ireland     | 22·3<br>(17·5–27·7) | 20·7<br>(16·3–25·1) | 1·08<br>(0·977–1·19)   | 11·5<br>(9·10–14·1) | 11·2<br>(8·70–13·8) | 1·03<br>(0·913–1·16)   |
| Israel      | 9·96<br>(8·03–11·7) | 10·7<br>(8·79–12·4) | 0·931<br>(0·836–1·03)  | 9·65<br>(8·04–11·3) | 8·40<br>(6·77–9·86) | 1·15<br>(1·05–1·28)    |
| Italy       | 5·33<br>(4·34–6·35) | 4·73<br>(3·90–5·45) | 1·13<br>(1·03–1·23)    | 4·20<br>(3·47–4·83) | 3·14<br>(2·49–3·60) | 1·34<br>(1·23–1·47)    |
| Luxembourg  | 9·66<br>(7·52–12·2) | 7·24<br>(5·53–8·80) | 1·33<br>(1·19–1·49)    | 6·61<br>(5·02–8·35) | 5·51<br>(4·08–7·02) | 1·20<br>(1·04–1·38)    |
| Malta       | 18·6<br>(15·1–22·0) | 14·0<br>(11·4–16·4) | 1·33<br>(1·19–1·47)    | 14·5<br>(11·5–17·6) | 11·8<br>(9·08–14·4) | 1·23<br>(1·12–1·36)    |
| Monaco      | 11·8<br>(8·96–15·8) | 9·22<br>(6·80–12·4) | 1·29<br>(0·949–1·65)   | 13·2<br>(10·1–16·9) | 10·7<br>(7·93–13·7) | 1·24<br>(0·941–1·60)   |
| Netherlands | 8·68<br>(6·63–11·0) | 7·81<br>(5·88–9·66) | 1·11<br>(0·989–1·25)   | 9·83<br>(7·71–12·1) | 7·73<br>(5·95–9·47) | 1·27<br>(1·17–1·38)    |
| Norway      | 25·6<br>(19·0–31·2) | 21·2<br>(15·4–26·2) | 1·21<br>(1·12–1·32)    | 12·7<br>(9·42–15·5) | 9·61<br>(6·86–11·7) | 1·32<br>(1·21–1·46)    |
| Portugal    | 17·2<br>(14·7–19·8) | 13·7<br>(12·0–15·2) | 1·26<br>(1·14–1·39)    | 20·5<br>(17·1–23·7) | 15·0<br>(12·2–17·2) | 1·37<br>(1·23–1·53)    |
| San Marino  | 8·53<br>(6·56–10·9) | 4·96<br>(3·77–6·55) | 1·74<br>(1·32–2·23)    | 7·08<br>(4·72–9·97) | 4·12<br>(2·75–5·94) | 1·74<br>(1·31–2·23)    |
| Spain       | 9·09<br>(7·52–10·7) | 8·75<br>(7·28–9·93) | 1·04<br>(0·914–1·18)   | 7·32<br>(6·03–8·61) | 5·85<br>(4·59–6·83) | 1·25<br>(1·12–1·43)    |
| Sweden      | 16·8<br>(13·0–20·9) | 11·9<br>(8·83–14·6) | 1·42<br>(1·25–1·60)    | 7·31<br>(5·68–9·09) | 5·19<br>(3·89–6·47) | 1·41<br>(1·29–1·57)    |
| Switzerland | 11·0<br>(8·53–13·5) | 9·93<br>(7·47–11·9) | 1·11<br>(0·989–1·23)   | 4·96<br>(3·92–6·09) | 4·12<br>(3·05–5·03) | 1·21<br>(1·09–1·35)    |

|                                    | 1990                        |                             |                              | 2019                        |                             |                             |
|------------------------------------|-----------------------------|-----------------------------|------------------------------|-----------------------------|-----------------------------|-----------------------------|
|                                    | Male                        | Female                      | Male to female ratio         | Male                        | Female                      | Male to female ratio        |
| United Kingdom                     | 20.1<br>(16.3–24.2)         | 18.9<br>(15.3–22.5)         | 1.06<br>(0.993–1.15)         | 15.8<br>(12.9–18.7)         | 14.4<br>(11.4–16.9)         | 1.10<br>(1.03–1.18)         |
| <b>Latin America and Caribbean</b> | <b>22.4<br/>(18.8–26.3)</b> | <b>21.6<br/>(18.2–25.0)</b> | <b>1.04<br/>(0.973–1.11)</b> | <b>21.6<br/>(18.3–24.9)</b> | <b>19.1<br/>(16.0–21.8)</b> | <b>1.13<br/>(1.06–1.21)</b> |
| Andean Latin America               | 39.8<br>(31.5–49.2)         | 41.1<br>(32.6–51.4)         | 0.971<br>(0.855–1.08)        | 33.4<br>(26.0–42.6)         | 32.0<br>(24.9–40.3)         | 1.05<br>(0.910–1.18)        |
| Bolivia (Plurinational State of)   | 46.4<br>(34.2–60.9)         | 47.3<br>(35.3–63.1)         | 0.988<br>(0.763–1.26)        | 42.9<br>(31.6–55.6)         | 45.8<br>(35.3–60.1)         | 0.942<br>(0.721–1.15)       |
| Ecuador                            | 25.8<br>(20.7–30.7)         | 35.7<br>(28.7–42.5)         | 0.725<br>(0.638–0.852)       | 28.1<br>(22.0–35.4)         | 26.9<br>(21.5–35.1)         | 1.05<br>(0.850–1.23)        |
| Peru                               | 44.0<br>(34.0–55.8)         | 41.8<br>(32.2–53.3)         | 1.06<br>(0.921–1.20)         | 33.8<br>(24.7–45.3)         | 31.2<br>(22.6–41.7)         | 1.09<br>(0.922–1.28)        |
| Caribbean                          | 20.9<br>(17.3–24.5)         | 19.7<br>(16.3–23.2)         | 1.06<br>(0.958–1.18)         | 19.3<br>(15.8–23.0)         | 17.4<br>(14.1–20.6)         | 1.11<br>(1.01–1.21)         |
| Antigua and Barbuda                | 32.2<br>(24.6–38.2)         | 19.9<br>(15.0–24.0)         | 1.62<br>(1.41–1.85)          | 26.3<br>(20.7–31.9)         | 24.7<br>(19.8–29.4)         | 1.06<br>(0.955–1.18)        |
| Bahamas                            | 33.2<br>(27.1–39.1)         | 21.5<br>(17.6–25.1)         | 1.55<br>(1.40–1.71)          | 23.8<br>(19.3–29.1)         | 17.1<br>(13.7–20.8)         | 1.39<br>(1.25–1.53)         |
| Barbados                           | 21.0<br>(16.1–25.0)         | 17.7<br>(13.4–20.8)         | 1.18<br>(1.05–1.31)          | 23.7<br>(18.2–28.7)         | 24.1<br>(18.8–29.4)         | 0.984<br>(0.884–1.10)       |
| Belize                             | 22.3<br>(17.3–27.5)         | 26.3<br>(20.6–32.0)         | 0.848<br>(0.750–0.960)       | 27.1<br>(21.3–32.9)         | 24.7<br>(19.4–29.7)         | 1.10<br>(0.996–1.20)        |
| Cuba                               | 18.4<br>(14.9–21.4)         | 17.9<br>(14.5–20.5)         | 1.03<br>(0.939–1.11)         | 22.4<br>(17.4–27.6)         | 20.1<br>(15.5–24.6)         | 1.12<br>(1.02–1.25)         |
| Dominica                           | 24.3<br>(18.8–29.8)         | 17.5<br>(13.8–21.7)         | 1.39<br>(1.13–1.70)          | 26.6<br>(20.4–33.7)         | 19.7<br>(15.0–24.8)         | 1.36<br>(1.10–1.73)         |
| Dominican Republic                 | 10.1<br>(7.56–13.1)         | 10.5<br>(7.80–14.1)         | 0.969<br>(0.754–1.16)        | 12.2<br>(8.95–16.6)         | 11.5<br>(8.37–15.4)         | 1.07<br>(0.817–1.35)        |
| Grenada                            | 40.6<br>(31.7–49.9)         | 33.0<br>(25.5–39.7)         | 1.23<br>(1.08–1.40)          | 35.4<br>(28.9–42.1)         | 35.1<br>(27.7–41.3)         | 1.01<br>(0.906–1.15)        |

|                                  | 1990                |                     |                        | 2019                |                     |                      |
|----------------------------------|---------------------|---------------------|------------------------|---------------------|---------------------|----------------------|
|                                  | Male                | Female              | Male to female ratio   | Male                | Female              | Male to female ratio |
| Guyana                           | 34.1<br>(26.6–41.8) | 29.9<br>(23.6–36.4) | 1.14<br>(0.991–1.31)   | 32.5<br>(24.4–41.5) | 28.5<br>(21.1–36.4) | 1.14<br>(1.01–1.32)  |
| Haiti                            | 27.4<br>(16.2–43.6) | 26.7<br>(15.9–42.3) | 1.08<br>(0.549–1.99)   | 24.6<br>(14.1–37.8) | 24.0<br>(14.8–36.7) | 1.05<br>(0.613–1.69) |
| Jamaica                          | 11.3<br>(9.03–13.7) | 10.3<br>(8.16–12.5) | 1.10<br>(0.997–1.22)   | 9.12<br>(6.93–11.4) | 8.54<br>(6.47–10.7) | 1.07<br>(0.971–1.19) |
| Saint Kitts and Nevis            | 51.0<br>(43.0–59.2) | 42.5<br>(36.4–48.6) | 1.20<br>(1.08–1.34)    | 35.6<br>(29.2–41.8) | 26.7<br>(21.4–32.1) | 1.33<br>(1.19–1.49)  |
| Saint Lucia                      | 26.1<br>(20.3–31.2) | 21.7<br>(16.8–26.0) | 1.20<br>(1.05–1.37)    | 21.7<br>(17.1–26.2) | 17.0<br>(13.1–20.7) | 1.27<br>(1.15–1.43)  |
| Saint Vincent and the Grenadines | 25.0<br>(19.3–30.3) | 20.6<br>(15.7–24.9) | 1.22<br>(1.09–1.35)    | 23.7<br>(18.9–28.8) | 20.8<br>(16.4–25.4) | 1.14<br>(1.03–1.27)  |
| Suriname                         | 18.1<br>(13.7–22.7) | 14.1<br>(10.6–17.6) | 1.29<br>(1.06–1.53)    | 19.4<br>(14.7–24.6) | 14.9<br>(11.0–18.8) | 1.32<br>(1.06–1.64)  |
| Trinidad and Tobago              | 29.6<br>(22.5–35.0) | 23.8<br>(18.4–27.7) | 1.25<br>(1.14–1.35)    | 12.0<br>(8.59–15.7) | 9.30<br>(6.61–12.1) | 1.29<br>(1.15–1.45)  |
| Central Latin America            | 16.7<br>(13.5–20.0) | 17.8<br>(14.8–20.8) | 0.941<br>(0.873–1.01)  | 14.3<br>(11.8–17.3) | 11.8<br>(9.62–14.2) | 1.21<br>(1.08–1.37)  |
| Colombia                         | 12.5<br>(10.0–14.9) | 13.3<br>(10.8–15.8) | 0.939<br>(0.866–1.01)  | 9.53<br>(7.20–12.4) | 8.51<br>(6.37–10.9) | 1.12<br>(1.03–1.21)  |
| Costa Rica                       | 10.8<br>(8.73–13.0) | 10.7<br>(8.66–12.6) | 1.01<br>(0.921–1.11)   | 10.4<br>(7.88–13.4) | 6.86<br>(5.08–8.63) | 1.53<br>(1.39–1.72)  |
| El Salvador                      | 17.7<br>(12.8–22.5) | 15.6<br>(11.3–19.7) | 1.14<br>(0.984–1.37)   | 27.7<br>(19.5–36.2) | 19.7<br>(13.7–26.1) | 1.42<br>(1.19–1.80)  |
| Guatemala                        | 63.4<br>(46.8–81.4) | 72.4<br>(55.2–90.9) | 0.876<br>(0.744–1.04)  | 56.8<br>(43.5–71.2) | 41.1<br>(31.5–52.0) | 1.38<br>(1.27–1.51)  |
| Honduras                         | 9.66<br>(7.01–12.9) | 9.28<br>(6.70–12.5) | 1.05<br>(0.820–1.31)   | 13.1<br>(9.67–17.0) | 7.33<br>(4.73–14.3) | 1.89<br>(0.904–2.65) |
| Mexico                           | 15.8<br>(12.8–19.1) | 18.2<br>(15.0–21.4) | 0.870<br>(0.805–0.938) | 13.0<br>(10.6–15.8) | 11.1<br>(9.02–13.3) | 1.18<br>(0.928–1.47) |

|                                     | 1990                        |                             |                               | 2019                        |                             |                               |
|-------------------------------------|-----------------------------|-----------------------------|-------------------------------|-----------------------------|-----------------------------|-------------------------------|
|                                     | Male                        | Female                      | Male to female ratio          | Male                        | Female                      | Male to female ratio          |
| Nicaragua                           | 12.1<br>(8.69–15.9)         | 7.77<br>(5.62–10.3)         | 1.56<br>(1.29–1.88)           | 14.2<br>(10.9–18.6)         | 10.6<br>(8.12–13.8)         | 1.36<br>(1.08–1.62)           |
| Panama                              | 12.1<br>(9.89–14.5)         | 10.1<br>(8.08–11.9)         | 1.20<br>(1.08–1.33)           | 14.0<br>(10.7–17.9)         | 10.9<br>(8.03–13.8)         | 1.29<br>(1.17–1.45)           |
| Venezuela (Bolivarian Republic of)  | 15.7<br>(12.2–18.7)         | 16.9<br>(12.9–19.8)         | 0.931<br>(0.843–1.01)         | 13.8<br>(10.1–17.8)         | 11.2<br>(8.10–14.8)         | 1.23<br>(1.10–1.42)           |
| Tropical Latin America              | 23.9<br>(19.9–28.5)         | 20.8<br>(17.2–24.4)         | 1.15<br>(1.06–1.24)           | 26.8<br>(22.7–30.4)         | 23.4<br>(19.6–26.3)         | 1.14<br>(1.06–1.24)           |
| Brazil                              | 24.5<br>(20.4–29.1)         | 21.2<br>(17.6–24.9)         | 1.15<br>(1.07–1.25)           | 27.1<br>(23.0–30.7)         | 23.7<br>(19.8–26.6)         | 1.14<br>(1.06–1.24)           |
| Paraguay                            | 9.09<br>(6.78–12.0)         | 9.84<br>(7.32–12.7)         | 0.927<br>(0.772–1.13)         | 14.7<br>(10.4–19.2)         | 12.8<br>(9.17–16.6)         | 1.15<br>(0.960–1.45)          |
| <b>North Africa and Middle East</b> | <b>12.6<br/>(10.3–15.3)</b> | <b>12.9<br/>(10.5–16.2)</b> | <b>0.974<br/>(0.824–1.13)</b> | <b>10.2<br/>(8.28–12.2)</b> | <b>10.5<br/>(8.41–12.4)</b> | <b>0.977<br/>(0.856–1.16)</b> |
| Afghanistan                         | 19.1<br>(11.9–26.3)         | 15.4<br>(8.80–22.5)         | 1.26<br>(0.999–1.67)          | 15.2<br>(11.0–20.8)         | 12.9<br>(8.49–17.9)         | 1.21<br>(0.900–1.76)          |
| Algeria                             | 16.1<br>(12.0–21.4)         | 20.7<br>(15.0–29.0)         | 0.788<br>(0.548–1.06)         | 8.96<br>(6.62–12.4)         | 13.7<br>(9.95–18.8)         | 0.664<br>(0.472–0.889)        |
| Bahrain                             | 12.8<br>(9.34–16.3)         | 11.6<br>(8.58–15.0)         | 1.11<br>(0.875–1.45)          | 9.47<br>(6.65–12.3)         | 10.4<br>(6.89–13.4)         | 0.920<br>(0.709–1.35)         |
| Egypt                               | 18.3<br>(14.5–22.9)         | 22.2<br>(17.4–29.9)         | 0.826<br>(0.665–0.952)        | 10.9<br>(7.72–15.5)         | 16.4<br>(11.4–25.6)         | 0.675<br>(0.459–0.895)        |
| Iran (Islamic Republic of)          | 11.0<br>(8.94–13.2)         | 10.6<br>(8.48–12.8)         | 1.05<br>(0.887–1.28)          | 8.13<br>(6.76–9.46)         | 8.14<br>(6.42–9.47)         | 1.00<br>(0.887–1.24)          |
| Iraq                                | 8.35<br>(6.20–10.8)         | 7.70<br>(5.91–9.75)         | 1.09<br>(0.840–1.37)          | 5.02<br>(3.83–6.66)         | 4.78<br>(3.61–6.75)         | 1.06<br>(0.817–1.30)          |
| Jordan                              | 10.8<br>(8.27–13.8)         | 15.6<br>(11.8–20.0)         | 0.696<br>(0.528–0.907)        | 7.80<br>(5.93–10.4)         | 9.55<br>(7.34–12.3)         | 0.826<br>(0.591–1.08)         |
| Kuwait                              | 10.2<br>(7.66–13.2)         | 13.0<br>(9.42–16.4)         | 0.794<br>(0.671–1.05)         | 16.3<br>(11.8–21.8)         | 12.6<br>(9.01–16.6)         | 1.30<br>(1.04–1.58)           |

|                      | 1990                              |                                   |                                     | 2019                              |                                   |                                     |
|----------------------|-----------------------------------|-----------------------------------|-------------------------------------|-----------------------------------|-----------------------------------|-------------------------------------|
|                      | Male                              | Female                            | Male to female ratio                | Male                              | Female                            | Male to female ratio                |
| Lebanon              | 12.4<br>(9.59–15.5)               | 9.61<br>(7.47–12.0)               | 1.30<br>(1.03–1.66)                 | 9.63<br>(6.97–14.0)               | 5.84<br>(4.26–8.65)               | 1.67<br>(1.19–2.22)                 |
| Libya                | 9.37<br>(6.72–12.6)               | 10.5<br>(7.59–13.7)               | 0.904<br>(0.705–1.16)               | 8.56<br>(6.17–11.3)               | 9.44<br>(6.84–12.4)               | 0.913<br>(0.717–1.17)               |
| Morocco              | 12.8<br>(9.03–17.1)               | 13.2<br>(9.51–17.7)               | 0.983<br>(0.741–1.33)               | 12.9<br>(9.36–17.4)               | 11.9<br>(8.79–15.8)               | 1.09<br>(0.841–1.43)                |
| Oman                 | 24.9<br>(15.7–34.4)               | 21.0<br>(13.2–29.3)               | 1.20<br>(0.895–1.62)                | 25.8<br>(17.4–34.9)               | 21.2<br>(14.6–28.5)               | 1.23<br>(0.918–1.69)                |
| Palestine            | 16.6<br>(11.8–23.9)               | 14.1<br>(10.1–21.6)               | 1.19<br>(0.835–1.50)                | 15.2<br>(11.9–20.2)               | 12.6<br>(9.60–19.2)               | 1.22<br>(0.861–1.49)                |
| Qatar                | 9.36<br>(6.25–14.5)               | 13.4<br>(8.75–19.4)               | 0.707<br>(0.505–0.983)              | 9.26<br>(6.25–13.2)               | 18.8<br>(13.0–25.9)               | 0.498<br>(0.370–0.669)              |
| Saudi Arabia         | 16.6<br>(11.6–22.0)               | 17.6<br>(12.3–23.9)               | 0.955<br>(0.712–1.20)               | 15.0<br>(11.5–19.1)               | 15.6<br>(11.5–21.3)               | 0.968<br>(0.770–1.21)               |
| Sudan                | 8.98<br>(5.28–14.2)               | 9.02<br>(5.16–13.9)               | 1.03<br>(0.621–1.73)                | 9.52<br>(5.94–14.4)               | 9.17<br>(6.08–13.4)               | 1.06<br>(0.666–1.60)                |
| Syrian Arab Republic | 8.38<br>(6.39–11.0)               | 10.2<br>(7.51–15.2)               | 0.830<br>(0.558–1.06)               | 10.6<br>(7.82–13.7)               | 13.0<br>(9.82–17.0)               | 0.818<br>(0.648–0.995)              |
| Tunisia              | 10.4<br>(7.84–13.7)               | 11.2<br>(8.67–14.1)               | 0.939<br>(0.716–1.21)               | 8.68<br>(6.03–12.3)               | 8.31<br>(5.90–11.2)               | 1.05<br>(0.799–1.36)                |
| Turkey               | 11.4<br>(8.71–14.9)               | 10.4<br>(7.86–13.8)               | 1.11<br>(0.858–1.37)                | 9.38<br>(7.08–12.0)               | 8.30<br>(5.80–10.6)               | 1.14<br>(0.938–1.55)                |
| United Arab Emirates | 39.1<br>(19.2–55.6)               | 45.0<br>(17.4–67.9)               | 0.920<br>(0.608–1.85)               | 26.0<br>(14.1–36.7)               | 24.3<br>(10.1–36.6)               | 1.13<br>(0.806–2.50)                |
| Yemen                | 10.2<br>(5.78–16.3)               | 10.5<br>(5.57–16.8)               | 1.01<br>(0.579–1.73)                | 12.4<br>(7.29–19.6)               | 11.6<br>(7.22–18.8)               | 1.11<br>(0.618–1.82)                |
| <b>South Asia</b>    | <b>12.0</b><br><b>(8.67–15.8)</b> | <b>13.8</b><br><b>(9.53–18.7)</b> | <b>0.881</b><br><b>(0.650–1.14)</b> | <b>11.1</b><br><b>(8.32–14.2)</b> | <b>12.8</b><br><b>(9.61–16.8)</b> | <b>0.881</b><br><b>(0.669–1.14)</b> |
| Bangladesh           | 11.1<br>(7.59–15.6)               | 10.7<br>(6.81–15.0)               | 1.05<br>(0.806–1.48)                | 7.73<br>(5.43–10.7)               | 8.52<br>(5.03–11.5)               | 0.932<br>(0.688–1.58)               |

|                                               | 1990                        |                             |                              | 2019                        |                             |                             |
|-----------------------------------------------|-----------------------------|-----------------------------|------------------------------|-----------------------------|-----------------------------|-----------------------------|
|                                               | Male                        | Female                      | Male to female ratio         | Male                        | Female                      | Male to female ratio        |
| Bhutan                                        | 9.01<br>(4.99–13.9)         | 9.22<br>(4.62–14.9)         | 1.02<br>(0.624–1.69)         | 11.0<br>(5.89–18.6)         | 11.8<br>(6.21–17.4)         | 0.987<br>(0.502–2.11)       |
| India                                         | 13.1<br>(9.43–17.4)         | 16.2<br>(11.1–22.2)         | 0.824<br>(0.582–1.09)        | 11.5<br>(8.54–14.9)         | 13.8<br>(10.2–18.4)         | 0.848<br>(0.632–1.12)       |
| Nepal                                         | 10.9<br>(6.68–16.0)         | 11.5<br>(6.33–19.0)         | 0.982<br>(0.591–1.55)        | 9.00<br>(5.31–13.6)         | 10.5<br>(6.20–15.3)         | 0.878<br>(0.544–1.46)       |
| Pakistan                                      | 8.39<br>(5.26–12.5)         | 4.80<br>(3.09–6.87)         | 1.78<br>(1.15–2.44)          | 11.4<br>(6.70–17.2)         | 5.66<br>(4.07–7.91)         | 2.04<br>(1.15–3.08)         |
| <b>Southeast Asia, East Asia, and Oceania</b> | <b>12.4<br/>(9.40–15.7)</b> | <b>11.7<br/>(9.01–14.8)</b> | <b>1.06<br/>(0.901–1.26)</b> | <b>11.0<br/>(8.95–13.2)</b> | <b>8.48<br/>(6.69–10.1)</b> | <b>1.31<br/>(1.11–1.58)</b> |
| East Asia                                     | 11.0<br>(8.39–14.1)         | 10.9<br>(8.07–14.0)         | 1.01<br>(0.858–1.25)         | 7.58<br>(6.04–9.27)         | 5.07<br>(3.87–6.33)         | 1.51<br>(1.21–1.86)         |
| China                                         | 10.9<br>(8.25–14.1)         | 10.9<br>(8.01–14.1)         | 1.01<br>(0.846–1.25)         | 6.74<br>(5.32–8.36)         | 4.68<br>(3.56–5.94)         | 1.45<br>(1.13–1.83)         |
| Democratic People's Republic of Korea         | 11.1<br>(7.55–15.6)         | 10.3<br>(7.06–14.2)         | 1.09<br>(0.825–1.43)         | 9.76<br>(6.73–13.3)         | 8.64<br>(6.01–11.8)         | 1.15<br>(0.821–1.58)        |
| Taiwan (Province of China)                    | 15.2<br>(12.2–18.3)         | 14.9<br>(12.2–17.4)         | 1.02<br>(0.892–1.16)         | 22.8<br>(17.6–29.0)         | 16.2<br>(12.2–20.3)         | 1.41<br>(1.26–1.62)         |
| Oceania                                       | 23.7<br>(17.9–32.3)         | 20.6<br>(15.0–29.2)         | 1.16<br>(0.881–1.42)         | 21.3<br>(15.6–32.3)         | 19.1<br>(14.3–28.2)         | 1.12<br>(0.869–1.39)        |
| Fiji                                          | 26.7<br>(20.2–33.9)         | 20.6<br>(15.1–27.2)         | 1.31<br>(1.02–1.65)          | 27.0<br>(21.0–34.9)         | 19.0<br>(14.1–24.7)         | 1.43<br>(1.15–1.80)         |
| Kiribati                                      | 22.1<br>(14.7–30.2)         | 18.4<br>(12.3–26.0)         | 1.21<br>(0.922–1.54)         | 21.4<br>(15.5–28.4)         | 19.5<br>(13.9–26.3)         | 1.11<br>(0.843–1.47)        |
| Marshall Islands                              | 39.6<br>(23.3–53.7)         | 30.8<br>(17.8–44.7)         | 1.31<br>(0.940–1.75)         | 38.9<br>(28.6–51.6)         | 39.3<br>(26.3–54.9)         | 1.00<br>(0.758–1.30)        |
| Micronesia (Federated States of)              | 34.8<br>(19.7–47.4)         | 31.9<br>(18.9–47.5)         | 1.11<br>(0.816–1.44)         | 39.8<br>(28.3–53.0)         | 38.1<br>(26.6–53.8)         | 1.06<br>(0.810–1.34)        |
| Nauru                                         | 50.6<br>(29.2–68.7)         | 45.0<br>(27.6–59.2)         | 1.13<br>(0.861–1.45)         | 48.4<br>(31.8–65.3)         | 40.8<br>(28.3–55.7)         | 1.20<br>(0.851–1.63)        |



|                                  | 1990                |                     |                        | 2019                |                     |                        |
|----------------------------------|---------------------|---------------------|------------------------|---------------------|---------------------|------------------------|
|                                  | Male                | Female              | Male to female ratio   | Male                | Female              | Male to female ratio   |
| Palau                            | 94.1<br>(51.7–121)  | 105<br>(60.0–139)   | 0.901<br>(0.728–1.09)  | 78.1<br>(57.0–97.1) | 86.8<br>(59.3–110)  | 0.905<br>(0.749–1.08)  |
| Papua New Guinea                 | 18.1<br>(12.4–28.9) | 15.6<br>(10.4–26.8) | 1.18<br>(0.744–1.60)   | 17.7<br>(11.5–32.5) | 16.0<br>(10.6–27.2) | 1.11<br>(0.746–1.53)   |
| Samoa                            | 27.9<br>(20.2–37.1) | 26.2<br>(18.5–37.0) | 1.08<br>(0.795–1.40)   | 21.8<br>(16.1–28.6) | 24.6<br>(17.4–34.1) | 0.900<br>(0.651–1.20)  |
| Solomon Islands                  | 67.2<br>(43.4–93.5) | 63.5<br>(37.8–92.2) | 1.09<br>(0.769–1.63)   | 55.7<br>(38.3–75.1) | 53.8<br>(37.5–71.6) | 1.04<br>(0.835–1.40)   |
| Tonga                            | 24.3<br>(17.8–32.3) | 20.2<br>(14.9–26.2) | 1.21<br>(0.940–1.55)   | 27.4<br>(20.9–34.8) | 21.4<br>(15.7–28.1) | 1.30<br>(1.02–1.67)    |
| Tuvalu                           | 40.7<br>(22.7–54.1) | 39.7<br>(24.0–55.6) | 1.03<br>(0.805–1.30)   | 34.6<br>(24.5–46.9) | 35.4<br>(25.1–49.3) | 0.984<br>(0.782–1.22)  |
| Vanuatu                          | 23.2<br>(15.5–33.7) | 22.9<br>(14.0–35.1) | 1.04<br>(0.671–1.50)   | 28.4<br>(19.1–40.0) | 25.2<br>(16.6–36.8) | 1.14<br>(0.840–1.53)   |
| Southeast Asia                   | 16.9<br>(12.3–21.7) | 14.5<br>(10.6–19.3) | 1.17<br>(0.929–1.41)   | 22.7<br>(17.5–27.7) | 20.0<br>(14.0–24.1) | 1.15<br>(0.967–1.54)   |
| Cambodia                         | 31.1<br>(17.4–43.8) | 35.7<br>(19.9–49.5) | 0.882<br>(0.657–1.17)  | 33.7<br>(23.0–45.3) | 38.8<br>(26.2–50.7) | 0.876<br>(0.670–1.19)  |
| Indonesia                        | 15.7<br>(10.7–21.0) | 11.0<br>(7.78–14.9) | 1.44<br>(1.00–1.98)    | 14.9<br>(11.4–18.9) | 13.4<br>(9.63–16.4) | 1.12<br>(0.837–1.55)   |
| Lao People's Democratic Republic | 24.6<br>(16.4–35.6) | 25.7<br>(16.7–36.7) | 0.976<br>(0.648–1.39)  | 23.4<br>(15.9–32.2) | 23.4<br>(15.7–32.5) | 1.01<br>(0.736–1.35)   |
| Malaysia                         | 28.7<br>(22.1–38.5) | 32.0<br>(24.2–47.7) | 0.906<br>(0.666–1.12)  | 66.1<br>(43.6–84.5) | 68.1<br>(39.6–87.6) | 0.987<br>(0.800–1.51)  |
| Maldives                         | 6.26<br>(3.60–8.69) | 11.9<br>(7.16–16.4) | 0.533<br>(0.377–0.779) | 6.61<br>(4.74–8.59) | 9.41<br>(6.65–12.0) | 0.709<br>(0.548–0.915) |
| Mauritius                        | 34.4<br>(27.6–40.9) | 27.8<br>(22.9–31.7) | 1.24<br>(1.07–1.43)    | 15.8<br>(12.2–19.6) | 11.1<br>(8.64–13.9) | 1.42<br>(1.24–1.62)    |
| Myanmar                          | 19.4<br>(13.4–27.3) | 16.3<br>(11.0–23.2) | 1.20<br>(0.884–1.64)   | 20.9<br>(15.7–27.1) | 15.1<br>(10.3–19.6) | 1.40<br>(1.15–1.92)    |

|                                  | 1990                              |                                   |                                   | 2019                              |                                   |                                   |
|----------------------------------|-----------------------------------|-----------------------------------|-----------------------------------|-----------------------------------|-----------------------------------|-----------------------------------|
|                                  | Male                              | Female                            | Male to female ratio              | Male                              | Female                            | Male to female ratio              |
| Philippines                      | 23.4<br>(15.1–30.9)               | 27.1<br>(17.2–35.9)               | 0.867<br>(0.688–1.02)             | 41.4<br>(28.3–54.8)               | 44.3<br>(27.0–57.0)               | 0.951<br>(0.677–1.41)             |
| Seychelles                       | 62.6<br>(48.8–77.1)               | 41.9<br>(33.3–49.7)               | 1.50<br>(1.19–1.85)               | 55.7<br>(42.3–70.5)               | 46.3<br>(34.5–55.9)               | 1.21<br>(0.922–1.61)              |
| Sri Lanka                        | 24.2<br>(16.0–32.2)               | 22.4<br>(14.5–29.5)               | 1.09<br>(0.843–1.43)              | 16.0<br>(10.8–22.3)               | 11.8<br>(7.97–18.2)               | 1.37<br>(0.941–1.76)              |
| Thailand                         | 8.96<br>(6.26–13.2)               | 9.10<br>(6.08–17.3)               | 1.02<br>(0.580–1.34)              | 19.3<br>(11.5–26.2)               | 16.4<br>(9.15–22.4)               | 1.20<br>(0.945–1.91)              |
| Timor-Leste                      | 15.2<br>(9.90–22.8)               | 21.4<br>(13.7–30.4)               | 0.722<br>(0.482–1.08)             | 28.8<br>(17.4–40.6)               | 30.3<br>(20.2–41.6)               | 0.964<br>(0.625–1.43)             |
| Viet Nam                         | 11.5<br>(7.85–15.8)               | 9.82<br>(6.56–14.7)               | 1.19<br>(0.858–1.56)              | 14.7<br>(11.3–19.2)               | 11.5<br>(8.47–15.9)               | 1.30<br>(0.941–1.70)              |
| <b>Sub-Saharan Africa</b>        | <b>33.0</b><br><b>(22.3–44.5)</b> | <b>26.4</b><br><b>(17.1–36.2)</b> | <b>1.26</b><br><b>(1.04–1.53)</b> | <b>34.1</b><br><b>(25.7–43.8)</b> | <b>26.1</b><br><b>(19.2–33.3)</b> | <b>1.31</b><br><b>(1.13–1.63)</b> |
| Central Sub-Saharan Africa       | 45.3<br>(28.8–67.0)               | 31.6<br>(19.8–46.9)               | 1.47<br>(0.940–2.16)              | 45.5<br>(30.7–66.2)               | 31.3<br>(20.8–46.7)               | 1.49<br>(1.02–2.22)               |
| Angola                           | 39.7<br>(25.4–58.3)               | 27.7<br>(16.3–41.7)               | 1.47<br>(0.927–2.15)              | 45.9<br>(34.0–59.9)               | 30.1<br>(21.6–40.5)               | 1.54<br>(1.21–1.95)               |
| Central African Republic         | 50.1<br>(30.7–73.9)               | 32.8<br>(18.2–49.0)               | 1.59<br>(1.02–2.48)               | 48.1<br>(31.3–71.0)               | 32.4<br>(19.5–49.2)               | 1.53<br>(0.966–2.28)              |
| Congo                            | 45.8<br>(29.3–67.7)               | 33.8<br>(22.0–49.3)               | 1.37<br>(0.963–1.90)              | 42.0<br>(27.8–59.0)               | 39.1<br>(26.3–54.3)               | 1.09<br>(0.783–1.60)              |
| Democratic Republic of the Congo | 46.1<br>(27.2–73.2)               | 32.5<br>(19.1–53.4)               | 1.47<br>(0.804–2.43)              | 45.1<br>(27.7–71.7)               | 30.9<br>(18.8–51.1)               | 1.52<br>(0.885–2.54)              |
| Equatorial Guinea                | 42.5<br>(24.3–66.4)               | 27.4<br>(13.2–43.7)               | 1.64<br>(0.920–2.67)              | 45.0<br>(31.8–61.9)               | 35.9<br>(23.2–52.3)               | 1.28<br>(0.949–1.71)              |
| Gabon                            | 48.8<br>(32.1–69.2)               | 30.0<br>(20.9–41.1)               | 1.64<br>(1.12–2.30)               | 54.4<br>(36.9–75.3)               | 32.1<br>(20.9–44.8)               | 1.74<br>(1.09–2.54)               |
| Eastern Sub-Saharan Africa       | 35.8<br>(22.3–50.0)               | 27.7<br>(16.2–39.6)               | 1.31<br>(1.02–1.75)               | 32.4<br>(23.6–42.7)               | 24.2<br>(17.8–31.6)               | 1.34<br>(1.14–1.65)               |

|                             | 1990                |                     |                      | 2019                |                     |                      |
|-----------------------------|---------------------|---------------------|----------------------|---------------------|---------------------|----------------------|
|                             | Male                | Female              | Male to female ratio | Male                | Female              | Male to female ratio |
| Burundi                     | 35.5<br>(22.2–53.5) | 31.8<br>(17.6–48.7) | 1.16<br>(0.724–1.83) | 31.8<br>(20.8–45.3) | 28.1<br>(16.8–43.3) | 1.17<br>(0.762–1.74) |
| Comoros                     | 31.2<br>(18.5–46.8) | 28.5<br>(16.5–42.8) | 1.11<br>(0.788–1.53) | 34.0<br>(23.0–49.1) | 31.0<br>(20.0–44.1) | 1.12<br>(0.783–1.58) |
| Djibouti                    | 30.9<br>(16.8–44.8) | 26.3<br>(14.3–39.2) | 1.19<br>(0.870–1.60) | 38.8<br>(24.0–55.3) | 31.7<br>(19.1–46.8) | 1.25<br>(0.852–1.69) |
| Eritrea                     | 54.1<br>(23.2–102)  | 34.4<br>(14.4–67.7) | 1.77<br>(0.549–4.18) | 64.5<br>(32.1–119)  | 42.3<br>(22.9–79.5) | 1.62<br>(0.689–3.31) |
| Ethiopia                    | 46.7<br>(23.1–71.5) | 31.7<br>(13.2–51.3) | 1.55<br>(0.902–2.46) | 28.3<br>(19.7–38.9) | 19.7<br>(13.8–26.4) | 1.45<br>(1.11–1.94)  |
| Kenya                       | 28.8<br>(19.4–40.0) | 24.7<br>(16.6–34.5) | 1.18<br>(0.862–1.62) | 41.9<br>(29.5–56.2) | 30.0<br>(20.7–42.1) | 1.42<br>(1.02–1.90)  |
| Madagascar                  | 30.6<br>(21.9–41.9) | 27.0<br>(18.6–37.0) | 1.14<br>(0.949–1.41) | 33.5<br>(21.5–48.5) | 29.3<br>(19.0–41.7) | 1.16<br>(0.886–1.58) |
| Malawi                      | 34.5<br>(21.9–48.6) | 29.2<br>(17.1–41.7) | 1.20<br>(0.887–1.64) | 33.9<br>(23.7–46.8) | 22.0<br>(15.4–30.4) | 1.55<br>(1.20–2.01)  |
| Mozambique                  | 28.0<br>(14.6–41.3) | 21.5<br>(9.26–33.7) | 1.34<br>(0.981–1.88) | 36.9<br>(25.1–52.1) | 21.8<br>(14.1–32.3) | 1.72<br>(1.31–2.38)  |
| Rwanda                      | 36.4<br>(24.0–52.1) | 29.7<br>(18.2–43.5) | 1.25<br>(0.916–1.71) | 26.2<br>(16.8–38.6) | 20.6<br>(12.8–30.2) | 1.30<br>(0.871–1.90) |
| Somalia                     | 36.5<br>(14.2–58.4) | 26.5<br>(8.12–46.9) | 1.46<br>(0.931–2.33) | 34.6<br>(16.1–53.6) | 26.0<br>(9.19–42.9) | 1.39<br>(0.972–2.11) |
| South Sudan                 | 29.6<br>(17.1–43.3) | 24.5<br>(13.8–37.3) | 1.23<br>(0.914–1.64) | 27.3<br>(17.8–39.5) | 20.6<br>(12.9–29.5) | 1.34<br>(0.991–1.79) |
| Uganda                      | 27.6<br>(16.3–40.0) | 20.1<br>(10.5–30.0) | 1.40<br>(1.00–1.97)  | 31.3<br>(21.3–44.0) | 23.0<br>(15.3–32.4) | 1.38<br>(0.963–1.87) |
| United Republic of Tanzania | 32.5<br>(22.6–44.8) | 28.5<br>(19.0–39.4) | 1.15<br>(0.914–1.47) | 27.3<br>(18.4–38.1) | 23.7<br>(16.1–32.7) | 1.16<br>(0.877–1.57) |
| Zambia                      | 39.5<br>(27.5–54.6) | 31.6<br>(21.6–44.7) | 1.26<br>(0.961–1.64) | 41.7<br>(30.3–54.8) | 28.0<br>(19.7–38.8) | 1.50<br>(1.19–1.91)  |

|                             | 1990                |                     |                      | 2019                |                     |                      |
|-----------------------------|---------------------|---------------------|----------------------|---------------------|---------------------|----------------------|
|                             | Male                | Female              | Male to female ratio | Male                | Female              | Male to female ratio |
| Southern Sub-Saharan Africa | 30·1<br>(23·0–38·5) | 25·0<br>(19·7–31·3) | 1·21<br>(1·03–1·45)  | 42·3<br>(34·7–51·1) | 30·1<br>(23·9–36·2) | 1·41<br>(1·22–1·68)  |
| Botswana                    | 44·6<br>(27·8–66·0) | 29·9<br>(18·5–48·0) | 1·53<br>(1·01–2·24)  | 56·0<br>(40·2–75·5) | 41·5<br>(26·8–63·6) | 1·39<br>(0·956–1·97) |
| Eswatini                    | 43·3<br>(28·6–63·1) | 28·5<br>(19·7–38·7) | 1·53<br>(1·12–2·00)  | 66·3<br>(47·3–90·5) | 37·1<br>(24·1–53·6) | 1·82<br>(1·38–2·43)  |
| Lesotho                     | 29·0<br>(19·5–40·0) | 18·1<br>(12·5–25·5) | 1·61<br>(1·19–2·14)  | 46·4<br>(33·1–63·2) | 31·5<br>(20·7–45·9) | 1·50<br>(1·14–2·03)  |
| Namibia                     | 50·6<br>(32·2–75·7) | 30·9<br>(20·0–46·4) | 1·67<br>(1·07–2·39)  | 65·7<br>(46·3–91·6) | 33·8<br>(22·5–49·1) | 1·98<br>(1·40–2·78)  |
| South Africa                | 26·9<br>(20·6–34·4) | 24·2<br>(19·1–30·8) | 1·12<br>(0·935–1·32) | 37·1<br>(30·6–44·6) | 27·3<br>(22·1–32·8) | 1·37<br>(1·17–1·60)  |
| Zimbabwe                    | 41·4<br>(28·8–55·6) | 32·7<br>(21·6–44·6) | 1·28<br>(0·974–1·88) | 63·8<br>(45·2–85·1) | 44·6<br>(26·1–64·1) | 1·47<br>(1·09–2·23)  |
| Western Sub-Saharan Africa  | 29·0<br>(17·6–40·2) | 24·5<br>(14·5–34·3) | 1·19<br>(0·972–1·46) | 31·1<br>(22·3–40·7) | 24·8<br>(16·7–33·0) | 1·26<br>(0·989–1·63) |
| Benin                       | 35·8<br>(18·7–50·2) | 28·0<br>(14·6–40·2) | 1·30<br>(1·01–1·66)  | 36·0<br>(22·6–52·0) | 25·7<br>(16·1–35·9) | 1·41<br>(1·08–1·92)  |
| Burkina Faso                | 38·0<br>(15·7–57·2) | 26·8<br>(10·8–42·5) | 1·46<br>(1·08–1·97)  | 36·0<br>(21·8–50·4) | 24·8<br>(14·1–35·0) | 1·47<br>(1·16–1·88)  |
| Cabo Verde                  | 18·5<br>(12·9–25·7) | 15·7<br>(10·9–21·8) | 1·19<br>(0·882–1·51) | 47·4<br>(35·9–59·3) | 24·8<br>(18·4–32·6) | 1·92<br>(1·52–2·38)  |
| Cameroon                    | 35·4<br>(24·2–49·6) | 31·1<br>(19·9–44·4) | 1·16<br>(0·828–1·59) | 42·7<br>(27·7–61·2) | 30·7<br>(19·4–44·5) | 1·41<br>(1·02–1·96)  |
| Chad                        | 33·3<br>(15·3–52·9) | 26·8<br>(10·3–45·5) | 1·29<br>(0·829–2·00) | 34·2<br>(22·2–48·5) | 27·4<br>(17·2–39·6) | 1·26<br>(0·992–1·70) |
| Côte d'Ivoire               | 41·7<br>(27·5–57·0) | 28·5<br>(17·8–39·7) | 1·47<br>(1·17–1·87)  | 39·0<br>(25·7–54·9) | 26·4<br>(17·3–36·7) | 1·49<br>(1·10–1·98)  |
| Gambia                      | 32·6<br>(17·3–48·0) | 24·4<br>(12·4–36·7) | 1·35<br>(1·04–1·72)  | 40·0<br>(25·0–57·1) | 29·6<br>(17·9–41·9) | 1·37<br>(0·997–1·85) |

|                       | 1990                |                     |                       | 2019                |                     |                       |
|-----------------------|---------------------|---------------------|-----------------------|---------------------|---------------------|-----------------------|
|                       | Male                | Female              | Male to female ratio  | Male                | Female              | Male to female ratio  |
| Ghana                 | 42.8<br>(25.5–60.6) | 27.0<br>(15.6–39.7) | 1.62<br>(1.15–2.16)   | 60.6<br>(41.9–82.1) | 23.9<br>(16.6–32.8) | 2.56<br>(1.96–3.24)   |
| Guinea                | 34.3<br>(19.9–49.7) | 35.9<br>(18.6–54.0) | 0.981<br>(0.696–1.42) | 39.3<br>(26.1–57.0) | 33.6<br>(21.4–48.0) | 1.19<br>(0.885–1.66)  |
| Guinea-Bissau         | 53.7<br>(25.9–81.1) | 34.1<br>(15.8–53.2) | 1.61<br>(1.11–2.32)   | 51.0<br>(33.2–72.8) | 33.0<br>(19.7–47.3) | 1.56<br>(1.23–2.05)   |
| Liberia               | 33.5<br>(22.5–46.4) | 31.9<br>(20.1–44.6) | 1.06<br>(0.848–1.31)  | 27.2<br>(18.5–39.2) | 24.2<br>(15.3–34.5) | 1.14<br>(0.825–1.64)  |
| Mali                  | 16.1<br>(7.81–25.0) | 15.4<br>(6.48–24.4) | 1.07<br>(0.823–1.45)  | 12.9<br>(7.49–20.5) | 13.2<br>(7.25–20.5) | 0.997<br>(0.641–1.58) |
| Mauritania            | 35.8<br>(23.5–50.0) | 30.2<br>(20.1–43.0) | 1.20<br>(0.910–1.56)  | 31.1<br>(20.7–44.4) | 29.0<br>(18.6–41.3) | 1.09<br>(0.804–1.49)  |
| Niger                 | 35.0<br>(16.0–54.5) | 28.1<br>(9.83–47.7) | 1.30<br>(0.850–1.97)  | 28.5<br>(16.7–43.8) | 23.6<br>(12.1–37.1) | 1.23<br>(0.914–1.70)  |
| Nigeria               | 23.7<br>(13.5–34.2) | 22.0<br>(12.2–31.9) | 1.10<br>(0.760–1.55)  | 24.5<br>(15.2–34.5) | 24.1<br>(14.5–34.7) | 1.04<br>(0.655–1.52)  |
| Sao Tome and Principe | 41.1<br>(29.1–56.1) | 34.7<br>(24.1–46.8) | 1.19<br>(0.960–1.49)  | 56.1<br>(40.5–73.4) | 48.6<br>(33.7–69.2) | 1.18<br>(0.854–1.57)  |
| Senegal               | 26.2<br>(13.4–38.6) | 23.3<br>(11.8–34.0) | 1.14<br>(0.864–1.47)  | 25.4<br>(16.4–37.0) | 21.8<br>(13.6–31.5) | 1.18<br>(0.850–1.64)  |
| Sierra Leone          | 36.1<br>(22.5–50.2) | 28.8<br>(16.0–41.6) | 1.27<br>(0.961–1.62)  | 33.4<br>(22.2–47.7) | 28.6<br>(18.5–41.0) | 1.18<br>(0.858–1.65)  |
| Togo                  | 32.3<br>(20.8–45.2) | 29.8<br>(17.9–41.7) | 1.10<br>(0.840–1.44)  | 42.0<br>(28.2–59.5) | 28.5<br>(18.5–40.5) | 1.50<br>(1.12–2.14)   |

Appendix Table 7. Population-attributable fractions of lower respiratory infections due to evaluated risk factors among children younger than 5 years in 2019, males (M) and females (F) (95% UI)

|                                                         | Child wasting         |                      | Child stunting      |                     | Household air pollution |                      | Low birth weight     |                      | Handwashing         |                     | Short gestation      |                      | Ambient particulate matter |                       | Child underweight  |                     | Non-exclusive breastfeeding |                     | Secondhand smoke      |                      | High temperature     |                       | Low temperature      |                      |
|---------------------------------------------------------|-----------------------|----------------------|---------------------|---------------------|-------------------------|----------------------|----------------------|----------------------|---------------------|---------------------|----------------------|----------------------|----------------------------|-----------------------|--------------------|---------------------|-----------------------------|---------------------|-----------------------|----------------------|----------------------|-----------------------|----------------------|----------------------|
|                                                         | M                     | F                    | M                   | F                   | M                       | F                    | M                    | F                    | M                   | F                   | M                    | F                    | M                          | F                     | M                  | F                   | M                           | F                   | M                     | F                    | M                    | F                     | M                    | F                    |
| <b>Global</b>                                           | 53.0<br>(37.7 – 61.8) | 56.4<br>(40.7– 65.1) | 11.4<br>(1.0– 28.9) | 12.7<br>(1.1– 32.1) | 31.4<br>(21.5– 41.5)    | 31.2<br>(21.3– 41.5) | 22.7<br>(20.5– 24.9) | 20.2<br>(18.3– 22.6) | 17.0<br>(7.7– 25.4) | 17.0<br>(7.7– 25.4) | 16.2<br>(14.7– 17.9) | 15.2<br>(13.7– 17.0) | 13.6<br>(9.3– 19.1)        | 14.3<br>(9.7– 20.1)   | 9.9<br>(6.4– 17.9) | 11.0<br>(7.3– 19.7) | 7.3<br>(4.0– 11.0)          | 7.4<br>(4.0– 11.2)  | 6.9<br>(3.7– 10.1)    | 7.0<br>(3.8– 10.3)   | 5.9<br>(2.0– 15.0)   | 6.1<br>(2.5– 14.7)    | 2.7<br>(<0.1– 5.6)   | 2.7<br>(<0.1– 5.9)   |
| <b>Central Europe, Eastern Europe, and Central Asia</b> | 51.3<br>(32.6 – 62.3) | 54.6<br>(35.9– 65.1) | 7.0<br>(0.2– 21.1)  | 7.0<br>(0.2– 21.2)  | 3.2<br>(1.3– 5.9)       | 3.0<br>(1.2– 5.8)    | 13.7<br>(12.3– 15.3) | 11.3<br>(10.2– 12.5) | 4.5<br>(1.8– 7.2)   | 4.4<br>(1.8– 7.2)   | 11.5<br>(10.2– 12.8) | 8.3<br>(7.4– 9.3)    | 14.6<br>(8.6– 22.9)        | 14.4<br>(8.2– 22.7)   | 3.1<br>(1.6– 6.6)  | 4.7<br>(2.8– 9.5)   | 9.8<br>(5.3– 14.9)          | 10.7<br>(5.9– 16.1) | 14.0<br>(9.0– 19.3)   | 14.4<br>(9.2– 19.7)  | 0.8<br>(<0.1– 1.8)   | 0.8<br>(<0.1– 1.8)    | 18.2<br>(13.0– 24.2) | 18.1<br>(13.1– 23.8) |
| Central Asia                                            | 51.5<br>(33.2 – 62.2) | 55.2<br>(36.9– 65.3) | 7.0<br>(0.2– 20.7)  | 7.1<br>(0.2– 21.5)  | 3.6<br>(1.5– 6.6)       | 3.3<br>(1.4– 6.5)    | 13.8<br>(12.3– 15.6) | 11.2<br>(10.0– 12.6) | 4.9<br>(2.0– 7.9)   | 4.8<br>(1.9– 7.8)   | 11.7<br>(10.4– 13.3) | 8.1<br>(7.1– 9.2)    | 15.9<br>(9.2– 25.0)        | 15.6<br>(8.6– 25.0)   | 3.2<br>(1.6– 6.9)  | 5.0<br>(3.0– 10.2)  | 9.5<br>(4.8– 14.7)          | 10.6<br>(5.5– 16.4) | 13.0<br>(8.2– 18.1)   | 13.5<br>(8.6– 18.6)  | 0.9<br>(<0.1– 2.0)   | 0.9<br>(<0.1– 2.1)    | 18.1<br>(13.3– 23.6) | 18.0<br>(13.3– 23.1) |
| Armenia                                                 | 39.4<br>(18.2 – 55.2) | 48.8<br>(27.2– 62.6) | 6.3<br>(0.1– 20.1)  | 8.8<br>(0.5– 24.6)  | 0.5<br>(0.2– 1.1)       | 0.5<br>(0.1– 1.1)    | 13.6<br>(11.2– 16.2) | 12.8<br>(10.4– 15.5) | 3.8<br>(1.5– 6.2)   | 3.8<br>(1.5– 6.2)   | 10.8<br>(8.8– 13.0)  | 9.3<br>(7.4– 11.6)   | 17.1<br>(9.9– 26.9)        | 17.0<br>(9.9– 26.9)   | 2.1<br>(0.9– 4.6)  | 2.0<br>(0.8– 4.5)   | 7.6<br>(4.7– 11.1)          | 9.1<br>(5.7– 13.3)  | 23.2<br>(15.6 – 30.7) | 23.0<br>(15.8– 30.3) | <0.1<br>(<0.1– 0.2)  | <0.1<br>(<0.1– 0.2)   | 18.4<br>(8.4– 31.6)  | 18.4<br>(8.4– 31.6)  |
| Azerbaijan                                              | 43.8<br>(25.2 – 56.5) | 47.5<br>(29.0– 60.7) | 5.9<br>(0.1– 18.2)  | 5.7<br>(0.2– 17.8)  | 1.3<br>(0.4– 2.9)       | 1.3<br>(0.4– 3.0)    | 19.3<br>(14.6– 25.0) | 15.6<br>(11.4– 20.4) | 3.5<br>(1.4– 5.7)   | 3.5<br>(1.4– 5.7)   | 15.1<br>(11.1– 19.9) | 11.0<br>(7.7– 15.0)  | 13.4<br>(7.2– 22.5)        | 13.3<br>(6.8– 22.5)   | 2.8<br>(1.2– 6.5)  | 4.5<br>(2.4– 9.5)   | 10.9<br>(6.7– 16.2)         | 13.9<br>(8.4– 20.1) | 21.0<br>(14.4 – 28.1) | 21.2<br>(14.5– 28.2) | 0.5<br>(<0.1– 1.1)   | 0.5<br>(<0.1– 1.1)    | 15.7<br>(12.6– 19.1) | 15.7<br>(12.6– 19.1) |
| Georgia                                                 | 53.7<br>(32.7 – 68.6) | 46.4<br>(23.9– 63.6) | 6.8<br>(0.1– 21.7)  | 7.1<br>(0.2– 23.2)  | 5.2<br>(1.7– 11.8)      | 5.2<br>(1.6– 11.8)   | 6.6<br>(4.2– 9.7)    | 4.7<br>(3.0– 6.9)    | 3.3<br>(1.3– 5.4)   | 3.3<br>(1.3– 5.4)   | 5.9<br>(3.8– 8.7)    | 3.8<br>(2.4– 5.7)    | 9.1<br>(5.6– 14.0)         | 9.1<br>(5.5– 13.9)    | 2.1<br>(1.0– 4.7)  | 2.2<br>(1.0– 5.1)   | 9.8<br>(6.6– 13.3)          | 8.8<br>(5.8– 12.0)  | 22.5<br>(15.6 – 29.7) | 22.4<br>(15.2– 29.8) | <0.1<br>(<0.1– 0.2)  | <0.1<br>(<0.1– 0.2)   | 18.9<br>(11.2– 29.0) | 18.9<br>(11.2– 29.0) |
| Kazakhstan                                              | 45.4<br>(27.1 – 57.9) | 48.9<br>(30.4– 61.3) | 4.4<br>(0.1– 15.0)  | 5.0<br>(0.1– 16.2)  | 1.7<br>(0.5– 4.0)       | 1.7<br>(0.5– 4.0)    | 17.9<br>(14.1– 22.3) | 13.3<br>(10.3– 16.8) | 3.4<br>(1.4– 5.7)   | 3.4<br>(1.4– 5.7)   | 15.2<br>(11.8– 19.1) | 9.7<br>(7.2– 12.5)   | 10.8<br>(6.1– 17.0)        | 10.6<br>(6.0– 16.7)   | 2.1<br>(1.0– 4.4)  | 2.2<br>(1.1– 4.8)   | 9.6<br>(5.0– 15.1)          | 9.2<br>(4.8– 14.4)  | 16.4<br>(9.9– 22.7)   | 16.6<br>(10.3– 22.8) | 0.5<br>(<0.1– 2.0)   | 0.5<br>(<0.1– 2.0)    | 18.4<br>(11.3– 27.6) | 18.4<br>(11.3– 27.6) |
| Kyrgyzstan                                              | 44.4<br>(20.2 – 62.3) | 54.2<br>(30.7– 69.8) | 6.7<br>(0.2– 21.2)  | 7.3<br>(0.2– 23.1)  | 7.0<br>(2.9– 13.6)      | 7.0<br>(2.9– 13.6)   | 4.7<br>(3.7– 5.8)    | 3.8<br>(3.0– 4.8)    | 4.0<br>(1.6– 6.5)   | 4.0<br>(1.6– 6.5)   | 3.4<br>(2.7– 4.3)    | 2.4<br>(1.9– 3.1)    | 11.5<br>(6.4– 18.6)        | 11.4<br>(6.3– 18.6)   | 2.3<br>(1.1– 5.3)  | 3.4<br>(1.8– 7.4)   | 7.2<br>(4.0– 11.1)          | 7.1<br>(3.9– 11.0)  | 20.5<br>(13.4 – 27.7) | 20.5<br>(13.8– 27.2) | <0.1<br>(<0.1– <0.1) | <0.1<br>(<0.1 – <0.1) | 21.4<br>(8.4– 37.4)  | 21.4<br>(8.4– 37.4)  |
| Mongolia                                                | 36.0<br>(17.5 – 51.2) | 52.1<br>(28.8– 68.8) | 5.0<br>(0.1– 16.8)  | 6.5<br>(0.1– 20.1)  | 8.7<br>(3.7– 16.8)      | 8.5<br>(3.4– 17.0)   | 15.7<br>(11.5– 20.9) | 5.4<br>(3.5– 7.8)    | 8.5<br>(3.6– 13.6)  | 8.5<br>(3.6– 13.6)  | 13.0<br>(9.2– 17.4)  | 4.2<br>(2.7– 6.4)    | 16.8<br>(11.1– 24.0)       | 16.7<br>(10.8 – 24.1) | 2.5<br>(1.3– 5.3)  | 2.8<br>(1.5– 6.2)   | 6.8<br>(4.1– 10.0)          | 7.0<br>(4.2– 10.4)  | 14.7<br>(8.5– 21.1)   | 14.7<br>(8.5– 21.1)  | 0.2<br>(<0.1– 0.9)   | 0.2<br>(<0.1– 0.9)    | 18.3<br>(3.6– 34.9)  | 18.3<br>(3.6– 34.9)  |
| Tajikistan                                              | 63.1<br>(41.1 – 76.2) | 65.4<br>(45.5– 76.8) | 11.0<br>(0.3– 31.2) | 11.3<br>(0.6– 32.0) | 9.6<br>(4.3– 17.7)      | 9.6<br>(4.3– 17.7)   | 9.0<br>(5.9– 13.3)   | 7.8<br>(5.3– 11.1)   | 7.1<br>(2.9– 11.3)  | 7.1<br>(2.9– 11.3)  | 6.5<br>(4.2– 9.7)    | 5.3<br>(3.6– 7.8)    | 16.2<br>(7.9– 27.7)        | 16.2<br>(7.8– 27.7)   | 5.5<br>(2.9– 11.9) | 7.5<br>(4.6– 14.9)  | 8.3<br>(3.7– 13.8)          | 8.2<br>(3.6– 13.8)  | 11.6<br>(7.0– 16.4)   | 13.5<br>(8.6– 19.1)  | 0.3<br>(0.1– 0.5)    | 0.3<br>(0.1– 0.5)     | 21.4<br>(9.3– 34.9)  | 21.4<br>(9.3– 34.9)  |
| Turkmenistan                                            | 58.5<br>(37.9 – 70.7) | 58.1<br>(37.3– 70.1) | 5.7<br>(0.1– 19.1)  | 6.7<br>(0.1– 21.2)  | <0.1<br>(<0.1– 0.1)     | <0.1<br>(<0.1– 0.1)  | 6.8<br>(5.4– 8.5)    | 5.3<br>(4.2– 6.5)    | 4.6<br>(1.9– 7.4)   | 4.6<br>(1.9– 7.4)   | 6.4<br>(5.0– 8.1)    | 5.4<br>(4.4– 6.6)    | 13.7<br>(6.8– 23.1)        | 13.5<br>(6.8– 23.0)   | 4.7<br>(2.7– 9.5)  | 4.6<br>(2.5– 9.2)   | 6.9<br>(3.0– 11.4)          | 6.8<br>(3.1– 11.2)  | 20.7<br>(14.0 – 27.5) | 20.7<br>(14.1– 27.8) | 2.6<br>(0.9– 4.3)    | 2.6<br>(0.9– 4.3)     | 12.7<br>(10.0– 15.4) | 12.7<br>(10.0– 15.4) |
| Uzbekistan                                              | 50.0<br>(33.5 – 59.5) | 54.6<br>(38.2– 63.8) | 6.3<br>(0.3– 18.7)  | 6.5<br>(0.2– 20.2)  | 2.3<br>(0.8– 5.0)       | 2.2<br>(0.8– 4.9)    | 15.5<br>(13.6– 17.6) | 12.5<br>(10.9– 14.1) | 4.5<br>(1.8– 7.3)   | 4.5<br>(1.8– 7.3)   | 13.8<br>(12.1– 15.9) | 9.0<br>(7.7– 10.2)   | 17.2<br>(9.2– 27.6)        | 16.8<br>(8.8– 27.6)   | 2.5<br>(1.3– 5.4)  | 5.0<br>(3.1– 10.2)  | 10.3<br>(5.1– 16.0)         | 11.6<br>(5.7– 18.0) | 9.8<br>(5.7– 14.3)    | 9.9<br>(5.7– 14.5)   | 1.0<br>(<0.1– 2.7)   | 1.0<br>(<0.1– 2.7)    | 18.0<br>(13.9– 22.0) | 18.0<br>(13.9– 22.0) |
| Central Europe                                          | 49.9<br>(27.7 – 64.2) | 46.5<br>(23.9– 61.8) | 6.6<br>(0.2– 21.0)  | 6.9<br>(0.2– 21.9)  | 1.9<br>(0.6– 4.4)       | 2.0<br>(0.6– 4.7)    | 12.3<br>(10.9– 13.8) | 11.4<br>(10.0– 12.9) | 1.2<br>(0.5– 1.9)   | 1.2<br>(0.5– 2.0)   | 8.5<br>(7.5– 9.7)    | 8.4<br>(7.4– 9.5)    | 9.2<br>(5.9– 13.5)         | 9.2<br>(5.9– 13.5)    | 2.7<br>(1.3– 5.8)  | 2.7<br>(1.3– 6.0)   | 11.7<br>(7.6– 16.2)         | 10.5<br>(6.9– 14.5) | 18.0<br>(11.3 – 24.5) | 18.3<br>(11.6– 24.9) | <0.1<br>(<0.1– 0.1)  | <0.1<br>(<0.1– 0.1)   | 20.7<br>(14.8– 27.5) | 20.7<br>(14.8– 27.5) |

|                        | Child wasting       |                     | Child stunting     |                    | Household air pollution |                   | Low birth weight    |                     | Handwashing      |                  | Short gestation     |                     | Ambient particulate matter |                     | Child underweight |                  | Non-exclusive breastfeeding |                     | Secondhand smoke    |                     | High temperature    |                     | Low temperature     |                     |
|------------------------|---------------------|---------------------|--------------------|--------------------|-------------------------|-------------------|---------------------|---------------------|------------------|------------------|---------------------|---------------------|----------------------------|---------------------|-------------------|------------------|-----------------------------|---------------------|---------------------|---------------------|---------------------|---------------------|---------------------|---------------------|
|                        | M                   | F                   | M                  | F                  | M                       | F                 | M                   | F                   | M                | F                | M                   | F                   | M                          | F                   | M                 | F                | M                           | F                   | M                   | F                   | M                   | F                   | M                   | F                   |
| Albania                | 49.0<br>(25.8–65.4) | 39.5<br>(17.5–57.5) | 15.1<br>(1.4–37.8) | 12.9<br>(0.9–34.0) | 5.1<br>(1.7–11.2)       | 5.1<br>(1.7–11.3) | 8.5<br>(5.2–13.3)   | 5.2<br>(2.2–8.7)    | 1.7<br>(0.7–2.9) | 1.7<br>(0.7–2.9) | 7.2<br>(4.3–11.4)   | 5.2<br>(2.3–8.5)    | 9.5<br>(6.1–14.1)          | 9.5<br>(6.0–14.1)   | 5.5<br>(3.3–11.0) | 4.5<br>(2.6–9.4) | 8.7<br>(4.3–13.9)           | 2.4<br>(0.8–4.9)    | 20.8<br>(14.0–28.1) | 20.9<br>(14.2–28.0) | <0.1<br>(<0.1–0.1)  | <0.1<br>(<0.1–0.1)  | 19.2<br>(14.6–24.1) | 19.2<br>(14.6–24.1) |
| Bosnia and Herzegovina | 24.6<br>(10.4–39.3) | 25.5<br>(11.1–39.9) | 3.6<br>(0.1–11.6)  | 4.2<br>(0.3–13.4)  | 5.4<br>(1.9–11.0)       | 5.4<br>(1.9–11.0) | 26.3<br>(17.5–36.2) | 25.3<br>(17.4–34.9) | 1.3<br>(0.5–2.1) | 1.3<br>(0.5–2.1) | 24.4<br>(16.6–33.2) | 24.1<br>(16.9–33.0) | 14.7<br>(9.7–20.1)         | 14.8<br>(10.0–20.4) | 1.0<br>(0.4–2.2)  | 1.3<br>(0.6–2.6) | 17.7<br>(11.9–24.6)         | 16.6<br>(11.1–22.5) | 23.3<br>(15.5–30.8) | 23.2<br>(15.6–30.8) | <0.1<br>(<0.1–<0.1) | <0.1<br>(<0.1–<0.1) | 22.3<br>(15.8–29.9) | 22.3<br>(15.8–29.9) |
| Bulgaria               | 49.6<br>(25.7–65.1) | 50.0<br>(26.1–66.0) | 6.4<br>(0.1–20.2)  | 6.8<br>(0.3–21.1)  | 2.2<br>(0.6–5.2)        | 2.2<br>(0.6–5.2)  | 11.0<br>(8.7–13.9)  | 10.0<br>(7.9–12.7)  | 1.1<br>(0.4–1.8) | 1.1<br>(0.4–1.8) | 6.8<br>(5.3–8.5)    | 6.7<br>(5.2–8.5)    | 10.1<br>(6.4–14.8)         | 10.0<br>(6.3–14.8)  | 3.5<br>(1.8–7.5)  | 3.9<br>(2.1–8.4) | 11.3<br>(7.2–15.7)          | 10.6<br>(6.7–15.0)  | 22.6<br>(14.8–30.3) | 22.7<br>(14.9–30.4) | <0.1<br>(<0.1–<0.1) | <0.1<br>(<0.1–<0.1) | 21.3<br>(14.8–27.9) | 21.3<br>(14.8–27.9) |
| Croatia                | 42.1<br>(22.1–56.0) | 42.3<br>(22.0–56.9) | 4.8<br>(0.2–15.5)  | 5.7<br>(0.2–17.9)  | 0.6<br>(0.1–1.6)        | 0.6<br>(0.2–1.7)  | 16.2<br>(11.9–20.9) | 16.1<br>(11.7–21.5) | 1.0<br>(0.4–1.6) | 1.0<br>(0.4–1.6) | 13.4<br>(10.0–17.5) | 13.7<br>(9.8–18.2)  | 10.0<br>(6.2–14.5)         | 10.0<br>(6.3–14.7)  | 1.5<br>(0.7–3.4)  | 2.3<br>(1.1–5.2) | 10.2<br>(6.4–14.3)          | 11.0<br>(7.1–15.7)  | 20.6<br>(13.5–28.1) | 21.0<br>(13.8–28.1) | <0.1<br>(<0.1–0.1)  | <0.1<br>(<0.1–0.1)  | 20.6<br>(13.3–27.4) | 20.6<br>(13.3–27.4) |
| Czechia                | 43.5<br>(23.8–57.7) | 35.6<br>(18.2–49.3) | 2.9<br>(0.0–10.9)  | 2.5<br>(0.0–9.2)   | 0.1<br>(<0.1–0.4)       | 0.1<br>(<0.1–0.4) | 18.0<br>(13.2–23.0) | 24.4<br>(18.5–30.4) | 0.9<br>(0.3–1.4) | 0.9<br>(0.3–1.4) | 13.6<br>(10.1–17.3) | 18.9<br>(14.6–23.8) | 9.1<br>(5.6–13.6)          | 9.1<br>(5.7–13.5)   | 1.5<br>(0.6–3.4)  | 1.3<br>(0.5–3.1) | 11.7<br>(8.6–15.3)          | 10.5<br>(7.6–13.7)  | 17.3<br>(11.2–23.7) | 16.8<br>(10.6–23.2) | <0.1<br>(<0.1–0.2)  | <0.1<br>(<0.1–0.2)  | 21.1<br>(13.6–30.0) | 21.1<br>(13.6–30.0) |
| Hungary                | 43.3<br>(23.3–57.5) | 40.9<br>(21.4–54.9) | 5.0<br>(0.2–16.4)  | 5.6<br>(0.1–17.4)  | 1.9<br>(0.5–4.9)        | 1.9<br>(0.5–5.0)  | 19.1<br>(14.8–23.8) | 19.5<br>(14.7–24.4) | 0.9<br>(0.4–1.4) | 0.9<br>(0.4–1.4) | 14.8<br>(11.4–18.5) | 16.0<br>(11.9–20.3) | 8.7<br>(5.7–12.8)          | 8.8<br>(5.6–13.0)   | 1.2<br>(0.5–2.9)  | 1.6<br>(0.7–3.6) | 10.9<br>(7.1–15.3)          | 10.0<br>(6.5–14.0)  | 19.4<br>(12.3–26.8) | 19.5<br>(12.7–26.4) | <0.1<br>(<0.1–0.2)  | <0.1<br>(<0.1–0.2)  | 21.4<br>(11.9–30.6) | 21.4<br>(11.9–30.6) |
| Montenegro             | 44.4<br>(23.6–59.6) | 49.5<br>(28.2–64.7) | 5.6<br>(0.2–17.4)  | 5.6<br>(0.3–17.0)  | 3.7<br>(1.0–8.9)        | 3.7<br>(1.0–8.9)  | 14.6<br>(10.0–20.2) | 8.8<br>(5.6–13.5)   | 1.2<br>(0.5–2.0) | 1.2<br>(0.5–2.0) | 11.5<br>(8.0–15.8)  | 9.7<br>(6.2–14.7)   | 11.1<br>(7.1–15.9)         | 11.2<br>(7.2–16.2)  | 1.1<br>(0.4–2.5)  | 1.1<br>(0.5–2.6) | 12.2<br>(8.3–16.3)          | 14.5<br>(10.2–19.0) | 23.0<br>(15.4–30.4) | 23.2<br>(15.7–30.8) | <0.1<br>(<0.1–0.1)  | <0.1<br>(<0.1–0.1)  | 20.4<br>(14.1–28.1) | 20.4<br>(14.1–28.1) |
| North Macedonia        | 49.0<br>(24.8–65.5) | 41.1<br>(19.4–58.9) | 4.2<br>(0.1–14.5)  | 4.8<br>(0.1–15.8)  | 3.2<br>(1.0–7.4)        | 3.3<br>(1.0–7.4)  | 8.1<br>(5.3–11.7)   | 10.2<br>(6.8–14.5)  | 1.0<br>(0.4–1.7) | 1.0<br>(0.4–1.7) | 5.8<br>(3.8–8.3)    | 7.5<br>(5.0–10.9)   | 15.1<br>(10.0–21.4)        | 15.1<br>(10.1–21.4) | 1.3<br>(0.5–3.0)  | 1.3<br>(0.5–2.9) | 12.7<br>(8.4–17.4)          | 13.7<br>(9.3–18.5)  | 22.8<br>(14.8–30.5) | 22.8<br>(15.1–30.3) | <0.1<br>(<0.1–0.1)  | <0.1<br>(<0.1–0.1)  | 21.8<br>(15.6–28.1) | 21.8<br>(15.6–28.1) |
| Poland                 | 47.2<br>(24.9–62.2) | 45.2<br>(23.6–60.3) | 5.2<br>(0.1–17.3)  | 5.9<br>(0.3–18.7)  | 1.4<br>(0.4–3.8)        | 1.4<br>(0.4–3.8)  | 11.4<br>(10.1–12.9) | 11.7<br>(10.4–13.4) | 1.0<br>(0.4–1.6) | 1.0<br>(0.4–1.6) | 8.8<br>(7.8–10.0)   | 9.7<br>(8.5–11.0)   | 11.8<br>(7.8–17.1)         | 11.8<br>(7.7–16.9)  | 1.6<br>(0.7–3.6)  | 2.2<br>(1.1–4.8) | 8.9<br>(5.8–12.2)           | 8.8<br>(5.8–12.0)   | 16.0<br>(9.8–22.6)  | 16.2<br>(10.1–22.4) | <0.1<br>(<0.1–0.2)  | <0.1<br>(<0.1–0.2)  | 21.1<br>(13.3–30.0) | 21.1<br>(13.3–30.0) |
| Romania                | 51.5<br>(29.3–65.2) | 48.3<br>(26.0–63.4) | 5.9<br>(0.1–19.8)  | 6.2<br>(<0.1–20.8) | 1.5<br>(0.4–3.7)        | 1.5<br>(0.4–3.7)  | 12.7<br>(10.9–14.9) | 12.1<br>(10.2–14.3) | 1.2<br>(0.5–2.0) | 1.2<br>(0.5–2.0) | 8.4<br>(7.0–10.0)   | 8.3<br>(7.0–10.1)   | 8.2<br>(5.1–12.2)          | 8.1<br>(5.0–12.3)   | 2.6<br>(1.2–5.9)  | 2.4<br>(1.1–5.6) | 12.8<br>(8.2–17.7)          | 12.5<br>(8.0–17.1)  | 17.0<br>(10.3–23.5) | 17.4<br>(10.6–24.1) | <0.1<br>(<0.1–0.1)  | <0.1<br>(<0.1–0.1)  | 20.7<br>(14.2–28.2) | 20.7<br>(14.2–28.2) |
| Serbia                 | 47.8<br>(27.3–61.7) | 47.5<br>(27.1–62.6) | 4.0<br>(0.1–13.5)  | 5.2<br>(0.2–15.7)  | 2.7<br>(0.7–6.4)        | 2.7<br>(0.8–6.4)  | 15.8<br>(10.8–22.0) | 15.4<br>(10.6–21.1) | 1.0<br>(0.4–1.6) | 1.0<br>(0.4–1.6) | 11.8<br>(8.0–16.5)  | 12.6<br>(8.5–17.6)  | 13.1<br>(8.7–18.9)         | 13.2<br>(8.6–19.0)  | 1.5<br>(0.6–3.3)  | 2.4<br>(1.2–5.1) | 15.0<br>(10.2–20.2)         | 14.8<br>(9.9–20.0)  | 19.0<br>(12.0–25.7) | 19.2<br>(12.1–26.2) | <0.1<br>(<0.1–0.1)  | <0.1<br>(<0.1–0.1)  | 21.9<br>(14.8–28.9) | 21.9<br>(14.8–28.9) |
| Slovakia               | 50.8<br>(28.0–66.5) | 50.1<br>(26.9–66.1) | 5.9<br>(0.2–18.8)  | 6.9<br>(0.2–21.5)  | 0.1<br>(<0.1–0.3)       | 0.1<br>(<0.1–0.3) | 9.6<br>(6.7–13.3)   | 8.7<br>(5.9–12.3)   | 0.9<br>(0.3–1.4) | 0.9<br>(0.3–1.4) | 6.3<br>(4.4–8.7)    | 6.1<br>(4.1–8.5)    | 9.6<br>(5.9–14.4)          | 9.6<br>(5.8–14.5)   | 1.8<br>(0.8–3.9)  | 2.8<br>(1.5–6.3) | 8.3<br>(5.4–11.5)           | 8.1<br>(5.3–11.3)   | 14.3<br>(8.7–20.3)  | 15.4<br>(9.3–21.7)  | <0.1<br>(<0.1–0.1)  | <0.1<br>(<0.1–0.1)  | 20.2<br>(13.2–29.4) | 20.2<br>(13.2–29.4) |
| Slovenia               | 42.9<br>(22.4–58.1) | 42.6<br>(22.5–58.0) | 4.7<br>(0.1–15.6)  | 5.4<br>(0.1–17.0)  | 0.8<br>(0.2–2.1)        | 0.8<br>(0.2–2.2)  | 15.1<br>(11.2–19.6) | 16.2<br>(11.9–21.3) | 0.8<br>(0.3–1.4) | 0.8<br>(0.3–1.4) | 11.8<br>(8.7–15.2)  | 13.1<br>(9.6–17.4)  | 9.0<br>(5.4–13.4)          | 9.2<br>(5.7–13.6)   | 1.4<br>(0.6–3.3)  | 2.1<br>(1.0–4.7) | 9.0<br>(5.8–12.7)           | 11.7<br>(7.6–16.2)  | 18.2<br>(12.2–24.4) | 18.5<br>(12.2–25.4) | <0.1<br>(<0.1–0.1)  | <0.1<br>(<0.1–0.1)  | 22.1<br>(15.2–30.1) | 22.1<br>(15.2–30.1) |

|                          | Child wasting               |                             | Child stunting            |                           | Household air pollution      |                              | Low birth weight          |                           | Handwashing              |                          | Short gestation          |                          | Ambient particulate matter |                          | Child underweight        |                          | Non-exclusive breastfeeding |                           | Secondhand smoke           |                            | High temperature         |                          | Low temperature             |                             |
|--------------------------|-----------------------------|-----------------------------|---------------------------|---------------------------|------------------------------|------------------------------|---------------------------|---------------------------|--------------------------|--------------------------|--------------------------|--------------------------|----------------------------|--------------------------|--------------------------|--------------------------|-----------------------------|---------------------------|----------------------------|----------------------------|--------------------------|--------------------------|-----------------------------|-----------------------------|
|                          | M                           | F                           | M                         | F                         | M                            | F                            | M                         | F                         | M                        | F                        | M                        | F                        | M                          | F                        | M                        | F                        | M                           | F                         | M                          | F                          | M                        | F                        | M                           | F                           |
| Eastern Europe           | 50.3<br>(29.1–63.1)         | 52.6<br>(31.3–65.3)         | 7.9<br>(0.3–23.2)         | 6.2<br>(0.1–20.1)         | 0.3<br>(0.1–0.8)             | 0.3<br>(0.1–0.8)             | 13.6<br>(12.4–14.9)       | 12.4<br>(11.2–13.7)       | 2.4<br>(1.0–3.9)         | 2.4<br>(1.0–4.0)         | 10.7<br>(9.7–11.7)       | 10.5<br>(9.4–11.6)       | 6.1<br>(3.7–9.7)           | 6.1<br>(3.7–9.7)         | 2.2<br>(1.0–5.1)         | 2.3<br>(1.0–5.4)         | 11.5<br>(8.1–15.1)          | 11.6<br>(8.1–15.2)        | 20.7<br>(13.6–27.5)        | 20.9<br>(13.7–28.0)        | <0.1<br>(<0.1–0.4)       | <0.1<br>(<0.1–0.3)       | 17.2<br>(2.7–29.9)          | 17.3<br>(3.2–29.7)          |
| Belarus                  | 41.7<br>(21.0–57.7)         | 40.6<br>(19.9–57.3)         | 2.7<br>(0.0–9.5)          | 3.8<br>(<0.1–12.4)        | 0.1<br>(<0.1–0.3)            | 0.1<br>(<0.1–0.3)            | 13.6<br>(10.0–17.8)       | 12.4<br>(9.1–16.1)        | 1.9<br>(0.8–3.1)         | 1.9<br>(0.8–3.1)         | 11.6<br>(8.4–15.2)       | 11.5<br>(8.3–15.1)       | 8.8<br>(5.3–13.4)          | 8.9<br>(5.3–13.8)        | 1.4<br>(0.6–3.2)         | 0.3<br>(0.1–0.9)         | 12.2<br>(8.6–16.1)          | 12.6<br>(8.8–16.6)        | 20.8<br>(13.8–27.7)        | 20.5<br>(13.5–27.5)        | <0.1<br>(<0.1–0.2)       | <0.1<br>(<0.1–0.2)       | 18.3<br>(9.6–30.8)          | 18.3<br>(9.6–30.8)          |
| Estonia                  | 46.6<br>(26.3–60.4)         | 50.2<br>(29.5–64.1)         | 4.4<br>(0.1–15.0)         | 3.9<br>(0.0–13.7)         | 0.7<br>(0.1–2.0)             | 0.7<br>(0.1–2.1)             | 14.4<br>(10.9–18.5)       | 12.7<br>(9.7–16.1)        | 1.8<br>(0.7–3.0)         | 1.8<br>(0.7–3.0)         | 12.0<br>(9.0–15.4)       | 11.1<br>(8.4–14.2)       | 2.5<br>(0.9–4.9)           | 2.4<br>(0.9–4.5)         | 1.7<br>(0.7–3.9)         | 1.9<br>(0.8–4.5)         | 9.7<br>(6.0–13.7)           | 9.6<br>(5.9–13.6)         | 16.5<br>(10.6–22.9)        | 17.2<br>(11.0–23.3)        | 0.1<br>(<0.1–0.5)        | 0.1<br>(<0.1–0.5)        | 15.8<br>(3.4–32.6)          | 15.8<br>(3.4–32.6)          |
| Latvia                   | 37.1<br>(20.9–50.5)         | 41.1<br>(24.0–54.2)         | 3.8<br>(0.1–12.8)         | 3.6<br>(0.1–12.6)         | 0.7<br>(0.1–1.9)             | 0.7<br>(0.1–1.7)             | 23.6<br>(18.3–29.0)       | 20.7<br>(16.0–25.9)       | 1.9<br>(0.8–3.1)         | 1.9<br>(0.8–3.1)         | 20.4<br>(15.7–25.4)      | 18.9<br>(14.6–23.7)      | 6.7<br>(3.6–11.2)          | 6.7<br>(3.5–11.0)        | 1.4<br>(0.6–3.2)         | 1.7<br>(0.8–3.8)         | 8.5<br>(5.2–12.2)           | 7.8<br>(4.8–11.4)         | 16.0<br>(9.6–22.7)         | 16.5<br>(9.9–23.2)         | <0.1<br>(<0.1–0.3)       | <0.1<br>(<0.1–0.3)       | 17.2<br>(7.2–31.3)          | 17.2<br>(7.2–31.3)          |
| Lithuania                | 44.9<br>(24.2–58.7)         | 45.7<br>(25.5–58.5)         | 4.5<br>(0.1–15.0)         | 3.6<br>(<0.1–12.8)        | 0.3<br>(0.1–0.8)             | 0.3<br>(0.1–0.8)             | 14.9<br>(11.3–19.1)       | 16.2<br>(12.6–20.9)       | 1.9<br>(0.8–3.2)         | 1.9<br>(0.8–3.2)         | 12.0<br>(9.0–15.4)       | 13.9<br>(10.8–18.0)      | 5.2<br>(2.7–8.5)           | 5.3<br>(2.7–8.7)         | 1.7<br>(0.7–3.7)         | 1.8<br>(0.8–3.9)         | 8.3<br>(5.2–12.0)           | 8.9<br>(5.6–12.8)         | 15.3<br>(9.2–21.4)         | 15.6<br>(9.6–21.8)         | <0.1<br>(<0.1–0.2)       | <0.1<br>(<0.1–0.2)       | 19.1<br>(9.2–31.0)          | 19.1<br>(9.2–31.0)          |
| Republic of Moldova      | 19.6<br>(8.9–28.6)          | 26.0<br>(13.3–35.5)         | 2.0<br>(0.0–7.2)          | 2.2<br>(<0.1–7.9)         | 1.3<br>(0.4–2.9)             | 1.2<br>(0.4–2.8)             | 34.0<br>(29.0–39.4)       | 30.3<br>(25.3–35.7)       | 4.6<br>(1.9–7.4)         | 4.6<br>(1.9–7.4)         | 27.7<br>(23.4–32.0)      | 26.8<br>(22.9–31.2)      | 8.2<br>(3.9–13.9)          | 7.9<br>(3.9–13.2)        | 1.2<br>(0.5–2.7)         | 1.1<br>(0.5–2.5)         | 9.3<br>(6.0–13.0)           | 9.7<br>(6.4–13.5)         | 19.5<br>(13.2–26.1)        | 18.9<br>(12.7–25.3)        | <0.1<br>(<0.1–0.1)       | <0.1<br>(<0.1–0.1)       | 22.1<br>(13.3–30.8)         | 22.1<br>(13.3–30.8)         |
| Russian Federation       | 52.6<br>(30.9–65.8)         | 54.1<br>(32.4–67.1)         | 8.3<br>(0.3–24.2)         | 5.5<br>(0.1–18.8)         | 0.2<br>(0.1–0.6)             | 0.2<br>(0.1–0.6)             | 12.2<br>(11.0–13.3)       | 11.9<br>(10.8–12.9)       | 2.2<br>(0.9–3.6)         | 2.2<br>(0.9–3.6)         | 9.4<br>(8.4–10.2)        | 9.8<br>(8.9–10.7)        | 5.7<br>(3.2–9.2)           | 5.6<br>(3.2–9.1)         | 2.3<br>(1.0–5.2)         | 2.5<br>(1.1–6.0)         | 12.1<br>(8.5–15.7)          | 11.9<br>(8.3–15.3)        | 21.1<br>(13.8–28.1)        | 21.4<br>(14.2–28.6)        | <0.1<br>(<0.1–0.4)       | <0.1<br>(<0.1–0.4)       | 16.4<br>(<0.1–31.1)         | 16.5<br>(<0.1–31.1)         |
| Ukraine                  | 50.2<br>(30.0–63.1)         | 55.0<br>(33.2–69.7)         | 8.9<br>(0.7–25.0)         | 11.9<br>(0.9–32.4)        | 0.5<br>(0.1–1.3)             | 0.5<br>(0.1–1.3)             | 13.6<br>(10.6–17.3)       | 9.0<br>(5.9–12.8)         | 3.0<br>(1.2–5.0)         | 3.0<br>(1.2–5.0)         | 11.5<br>(8.9–14.5)       | 8.3<br>(5.4–11.9)        | 7.6<br>(4.2–12.5)          | 7.5<br>(4.1–12.7)        | 2.3<br>(1.1–4.9)         | 2.0<br>(0.9–4.5)         | 8.6<br>(5.3–12.2)           | 11.3<br>(7.3–15.9)        | 19.4<br>(12.3–26.0)        | 19.2<br>(12.4–26.3)        | <0.1<br>(<0.1–0.2)       | <0.1<br>(<0.1–0.2)       | 19.7<br>(13.4–26.1)         | 19.7<br>(13.5–26.1)         |
| <b>High-income</b>       | <b>40.7<br/>(18.0–58.0)</b> | <b>40.4<br/>(17.8–58.3)</b> | <b>3.4<br/>(0.0–12.0)</b> | <b>3.4<br/>(0.0–12.3)</b> | <b>0.2<br/>(&lt;0.1–0.4)</b> | <b>0.2<br/>(&lt;0.1–0.4)</b> | <b>9.4<br/>(8.4–10.4)</b> | <b>9.9<br/>(8.8–10.9)</b> | <b>1.6<br/>(0.6–2.6)</b> | <b>1.6<br/>(0.6–2.6)</b> | <b>7.5<br/>(6.8–8.3)</b> | <b>8.1<br/>(7.2–9.0)</b> | <b>5.4<br/>(3.3–8.5)</b>   | <b>5.5<br/>(3.4–8.6)</b> | <b>2.2<br/>(0.9–5.2)</b> | <b>2.2<br/>(0.9–5.1)</b> | <b>10.0<br/>(7.4–12.6)</b>  | <b>9.4<br/>(7.0–11.9)</b> | <b>13.9<br/>(8.6–19.7)</b> | <b>14.2<br/>(8.8–19.8)</b> | <b>0.7<br/>(0.4–1.1)</b> | <b>0.7<br/>(0.4–1.1)</b> | <b>16.2<br/>(11.8–21.2)</b> | <b>16.4<br/>(11.9–21.4)</b> |
| Australasia              | 46.1<br>(23.2–62.1)         | 44.8<br>(22.9–60.4)         | 3.4<br>(0.0–12.7)         | 3.2<br>(0.0–11.9)         | <0.1<br>(<0.1–0.1)           | <0.1<br>(<0.1–0.1)           | 11.4<br>(8.8–14.3)        | 13.6<br>(10.7–16.6)       | 1.9<br>(0.8–3.3)         | 1.9<br>(0.8–3.3)         | 9.9<br>(7.6–12.4)        | 12.2<br>(9.6–15.1)       | 2.5<br>(0.9–4.9)           | 2.7<br>(0.9–5.2)         | 2.0<br>(0.8–4.7)         | 1.9<br>(0.8–4.4)         | 9.8<br>(7.1–12.7)           | 9.9<br>(7.2–12.8)         | 12.1<br>(7.1–17.5)         | 12.3<br>(7.3–17.7)         | 5.8<br>(3.9–7.8)         | 5.6<br>(3.7–7.5)         | 8.8<br>(5.8–11.9)           | 9.3<br>(6.2–12.4)           |
| Australia                | 47.8<br>(23.9–64.7)         | 46.6<br>(23.4–62.9)         | 3.5<br>(0.0–13.2)         | 3.3<br>(0.0–12.4)         | <0.1<br>(<0.1–0.1)           | <0.1<br>(<0.1–0.1)           | 9.4<br>(6.8–12.5)         | 11.4<br>(8.3–14.9)        | 1.9<br>(0.8–3.2)         | 1.9<br>(0.8–3.2)         | 7.9<br>(5.7–10.6)        | 10.2<br>(7.3–13.5)       | 2.4<br>(0.7–4.9)           | 2.7<br>(0.7–5.4)         | 2.1<br>(0.8–4.8)         | 2.0<br>(0.8–4.5)         | 9.9<br>(7.0–13.1)           | 10.2<br>(7.2–13.5)        | 12.2<br>(7.0–17.8)         | 12.5<br>(7.4–18.0)         | 7.3<br>(4.8–9.7)         | 7.3<br>(4.8–9.7)         | 5.9<br>(2.7–8.9)            | 5.9<br>(2.7–8.9)            |
| New Zealand              | 39.5<br>(20.0–53.0)         | 38.9<br>(19.8–52.5)         | 2.9<br>(0.0–10.9)         | 2.9<br>(0.0–10.5)         | <0.1<br>(<0.1–0.1)           | <0.1<br>(<0.1–0.1)           | 19.5<br>(15.6–24.1)       | 20.8<br>(16.8–25.1)       | 2.0<br>(0.8–3.3)         | 2.0<br>(0.8–3.3)         | 17.7<br>(14.2–22.0)      | 18.9<br>(15.2–23.2)      | 2.8<br>(0.6–6.3)           | 2.7<br>(0.6–6.4)         | 1.7<br>(0.7–4.0)         | 1.7<br>(0.6–3.8)         | 9.2<br>(6.7–11.8)           | 8.9<br>(6.4–11.5)         | 11.7<br>(6.6–17.2)         | 11.6<br>(6.7–16.8)         | <0.1<br>(<0.1–<0.1)      | <0.1<br>(<0.1–<0.1)      | 20.5<br>(13.3–27.8)         | 20.5<br>(13.3–27.8)         |
| High-income Asia Pacific | 48.1<br>(23.6–65.4)         | 49.2<br>(24.7–66.3)         | 5.3<br>(0.1–17.9)         | 5.6<br>(0.1–18.7)         | <0.1<br>(<0.1–<0.1)          | <0.1<br>(<0.1–<0.1)          | 7.9<br>(6.9–8.9)          | 8.0<br>(6.9–9.0)          | 1.9<br>(0.7–3.1)         | 1.9<br>(0.7–3.1)         | 5.4<br>(4.7–6.1)         | 5.2<br>(4.4–5.9)         | 8.0<br>(4.8–12.5)          | 8.1<br>(4.7–12.6)        | 3.6<br>(1.8–7.7)         | 3.5<br>(1.7–7.6)         | 6.6<br>(4.4–8.9)            | 6.5<br>(4.4–9.0)          | 17.0<br>(11.0–23.2)        | 16.7<br>(10.7–23.0)        | 0.5<br>(<0.1–1.3)        | 0.5<br>(<0.1–1.4)        | 15.1<br>(12.0–18.4)         | 15.2<br>(12.1–18.5)         |



|                           | Child wasting       |                     | Child stunting    |                   | Household air pollution |                     | Low birth weight    |                     | Handwashing      |                  | Short gestation    |                    | Ambient particulate matter |                    | Child underweight |                   | Non-exclusive breastfeeding |                    | Secondhand smoke    |                     | High temperature    |                     | Low temperature     |                     |
|---------------------------|---------------------|---------------------|-------------------|-------------------|-------------------------|---------------------|---------------------|---------------------|------------------|------------------|--------------------|--------------------|----------------------------|--------------------|-------------------|-------------------|-----------------------------|--------------------|---------------------|---------------------|---------------------|---------------------|---------------------|---------------------|
|                           | M                   | F                   | M                 | F                 | M                       | F                   | M                   | F                   | M                | F                | M                  | F                  | M                          | F                  | M                 | F                 | M                           | F                  | M                   | F                   | M                   | F                   | M                   | F                   |
| Brunei Darussalam         | 37.1<br>(16.2–52.8) | 50.4<br>(29.1–64.1) | 6.8<br>(0.2–20.9) | 7.3<br>(0.3–22.1) | 0.1<br>(<0.1–0.2)       | 0.1<br>(<0.1–0.2)   | 17.4<br>(12.7–23.2) | 16.9<br>(12.1–22.5) | 2.0<br>(0.8–3.2) | 2.0<br>(0.8–3.2) | 12.2<br>(8.9–16.3) | 11.2<br>(8.0–15.2) | 3.4<br>(1.1–6.7)           | 3.3<br>(1.1–6.1)   | 6.3<br>(3.9–12.8) | 6.5<br>(4.0–13.0) | 7.5<br>(4.8–10.4)           | 8.2<br>(5.3–11.5)  | 14.4<br>(9.2–20.3)  | 14.6<br>(8.9–20.1)  | 0.9<br>(<0.1–5.8)   | 0.9<br>(<0.1–5.8)   | <0.1<br>(<0.1–0.5)  | <0.1<br>(<0.1–0.5)  |
| Japan                     | 51.5<br>(26.0–68.6) | 51.4<br>(26.1–68.5) | 6.3<br>(0.1–21.2) | 6.3<br>(0.1–21.1) | <0.1<br>(<0.1–<0.1)     | <0.1<br>(<0.1–<0.1) | 6.2<br>(5.0–6.8)    | 6.4<br>(5.3–7.1)    | 1.9<br>(0.7–3.1) | 1.9<br>(0.7–3.1) | 4.0<br>(3.3–4.5)   | 4.0<br>(3.3–4.5)   | 6.7<br>(3.8–10.7)          | 6.6<br>(3.8–10.7)  | 4.0<br>(2.0–8.6)  | 4.0<br>(2.0–8.6)  | 6.2<br>(4.0–8.5)            | 6.1<br>(4.0–8.4)   | 17.6<br>(11.4–24.0) | 17.3<br>(11.1–23.8) | 0.5<br>(<0.1–1.0)   | 0.5<br>(<0.1–1.1)   | 15.9<br>(12.8–19.2) | 15.8<br>(12.8–19.1) |
| Republic of Korea         | 35.0<br>(13.3–53.8) | 38.1<br>(15.0–56.7) | 2.1<br>(0.0–8.3)  | 3.2<br>(0.0–12.1) | <0.1<br>(<0.1–<0.1)     | <0.1<br>(<0.1–<0.1) | 11.7<br>(7.9–16.3)  | 11.3<br>(7.5–15.9)  | 1.9<br>(0.7–3.1) | 1.9<br>(0.7–3.1) | 8.0<br>(5.4–11.3)  | 7.6<br>(5.0–10.8)  | 14.4<br>(8.9–21.2)         | 14.3<br>(8.9–21.1) | 1.7<br>(0.5–4.2)  | 1.5<br>(0.4–4.0)  | 6.2<br>(3.8–9.1)            | 6.1<br>(3.8–9.0)   | 17.0<br>(10.6–23.6) | 16.7<br>(10.5–23.0) | 0.2<br>(<0.1–0.9)   | 0.2<br>(<0.1–0.9)   | 20.4<br>(14.7–25.9) | 20.4<br>(14.7–25.9) |
| Singapore                 | 47.0<br>(23.8–61.9) | 52.2<br>(28.7–66.7) | 2.2<br>(0.0–8.4)  | 3.2<br>(0.0–12.3) | <0.1<br>(<0.1–0.1)      | <0.1<br>(<0.1–0.1)  | 14.9<br>(11.5–19.1) | 13.5<br>(10.4–17.1) | 1.9<br>(0.8–3.1) | 1.9<br>(0.8–3.1) | 11.1<br>(8.6–14.2) | 9.3<br>(7.2–12.0)  | 10.0<br>(5.5–16.2)         | 9.8<br>(5.6–16.3)  | 2.3<br>(1.0–5.2)  | 2.1<br>(0.9–4.9)  | 12.4<br>(8.9–15.8)          | 12.1<br>(8.8–15.5) | 10.7<br>(6.2–15.6)  | 11.2<br>(6.4–16.1)  | 1.3<br>(<0.1–11.7)  | 1.3<br>(<0.1–11.7)  | 0.1<br>(<0.1–1.2)   | 0.1<br>(<0.1–1.2)   |
| High-income North America | 31.5<br>(10.5–50.7) | 31.9<br>(11.0–51.0) | 2.6<br>(0.0–10.2) | 2.3<br>(0.0–8.7)  | <0.1<br>(<0.1–<0.1)     | <0.1<br>(<0.1–<0.1) | 8.8<br>(8.0–9.5)    | 10.2<br>(9.3–11.0)  | 1.0<br>(0.4–1.6) | 1.0<br>(0.4–1.6) | 7.8<br>(7.1–8.5)   | 8.8<br>(8.1–9.6)   | 3.0<br>(1.7–5.3)           | 3.1<br>(1.7–5.2)   | 2.1<br>(0.8–5.0)  | 1.8<br>(0.7–4.5)  | 11.2<br>(8.5–14.3)          | 10.7<br>(8.2–13.6) | 12.7<br>(8.3–17.9)  | 12.9<br>(8.3–18.2)  | 0.7<br>(0.3–1.1)    | 0.7<br>(0.3–1.1)    | 14.9<br>(11.2–18.7) | 15.0<br>(11.3–18.9) |
| Canada                    | 35.0<br>(12.9–53.9) | 35.8<br>(13.1–55.1) | 2.4<br>(0.0–9.5)  | 2.2<br>(0.0–8.5)  | <0.1<br>(<0.1–<0.1)     | <0.1<br>(<0.1–<0.1) | 10.1<br>(7.3–13.7)  | 9.3<br>(6.8–12.5)   | 1.0<br>(0.4–1.7) | 1.0<br>(0.4–1.7) | 8.8<br>(6.4–11.7)  | 8.6<br>(6.2–11.6)  | 2.7<br>(1.1–5.1)           | 2.8<br>(1.1–5.2)   | 1.9<br>(0.7–4.5)  | 1.8<br>(0.6–4.3)  | 11.2<br>(8.0–14.8)          | 10.4<br>(7.5–13.9) | 12.6<br>(8.0–17.9)  | 12.9<br>(8.3–18.4)  | <0.1<br>(<0.1–0.3)  | <0.1<br>(<0.1–0.3)  | 20.8<br>(0.8–39.3)  | 20.8<br>(0.8–39.3)  |
| United States of America  | 31.3<br>(10.4–50.4) | 31.6<br>(10.9–50.6) | 2.6<br>(0.0–10.3) | 2.3<br>(0.0–8.7)  | <0.1<br>(<0.1–<0.1)     | <0.1<br>(<0.1–<0.1) | 8.7<br>(7.9–9.5)    | 10.2<br>(9.4–11.1)  | 1.0<br>(0.4–1.6) | 1.0<br>(0.4–1.6) | 7.7<br>(7.1–8.5)   | 8.9<br>(8.1–9.6)   | 3.1<br>(1.7–5.3)           | 3.1<br>(1.7–5.2)   | 2.1<br>(0.8–5.0)  | 1.8<br>(0.7–4.5)  | 11.2<br>(8.5–14.4)          | 10.7<br>(8.1–13.7) | 12.7<br>(8.2–17.9)  | 12.9<br>(8.3–18.2)  | 0.7<br>(0.4–1.2)    | 0.7<br>(0.4–1.1)    | 14.6<br>(11.1–18.1) | 14.7<br>(11.2–18.2) |
| Southern Latin America    | 48.8<br>(25.2–65.0) | 48.3<br>(24.3–65.1) | 4.8<br>(0.0–16.2) | 4.7<br>(0.0–16.3) | 0.5<br>(0.1–1.1)        | 0.5<br>(0.1–1.1)    | 8.5<br>(6.6–10.6)   | 8.4<br>(6.6–10.4)   | 2.4<br>(1.0–4.0) | 2.4<br>(1.0–4.0) | 6.3<br>(4.9–7.9)   | 6.5<br>(5.1–8.1)   | 7.2<br>(4.1–11.6)          | 7.3<br>(4.2–11.8)  | 2.5<br>(1.0–5.7)  | 2.5<br>(1.1–5.7)  | 9.8<br>(6.5–13.2)           | 9.2<br>(6.1–12.5)  | 14.3<br>(8.3–20.5)  | 14.7<br>(8.8–21.0)  | 0.8<br>(0.5–1.2)    | 0.8<br>(0.5–1.2)    | 16.0<br>(10.2–22.5) | 16.1<br>(10.2–22.5) |
| Argentina                 | 49.9<br>(26.2–66.2) | 49.8<br>(25.4–66.9) | 4.9<br>(0.0–16.6) | 4.9<br>(0.0–16.8) | 0.4<br>(0.1–1.1)        | 0.4<br>(0.1–1.1)    | 8.0<br>(6.0–10.2)   | 7.7<br>(5.7–9.8)    | 2.5<br>(1.0–4.1) | 2.5<br>(1.0–4.1) | 5.7<br>(4.2–7.4)   | 5.7<br>(4.2–7.4)   | 6.7<br>(3.7–11.2)          | 6.8<br>(3.7–11.3)  | 2.6<br>(1.1–5.9)  | 2.6<br>(1.1–5.9)  | 10.1<br>(6.6–13.7)          | 9.5<br>(6.2–13.0)  | 14.3<br>(8.4–20.6)  | 14.9<br>(8.8–21.2)  | 0.9<br>(0.5–1.4)    | 0.9<br>(0.5–1.4)    | 16.1<br>(10.5–22.4) | 16.1<br>(10.5–22.4) |
| Chile                     | 39.9<br>(18.4–55.9) | 38.1<br>(17.2–55.2) | 3.3<br>(0.0–12.6) | 3.1<br>(0.0–11.5) | 0.8<br>(0.2–1.9)        | 0.8<br>(0.2–1.9)    | 12.6<br>(9.5–16.2)  | 12.5<br>(9.5–16.0)  | 2.0<br>(0.8–3.4) | 2.0<br>(0.8–3.4) | 10.4<br>(7.7–13.6) | 11.0<br>(8.3–14.3) | 12.1<br>(7.7–18.1)         | 12.1<br>(7.6–18.2) | 1.7<br>(0.7–4.1)  | 1.7<br>(0.6–3.9)  | 8.0<br>(5.4–10.9)           | 7.7<br>(5.1–10.4)  | 12.8<br>(6.7–19.3)  | 13.1<br>(7.0–19.6)  | <0.1<br>(<0.1–<0.1) | <0.1<br>(<0.1–<0.1) | 19.3<br>(10.4–29.4) | 19.3<br>(10.4–29.4) |
| Uruguay                   | 46.6<br>(22.8–63.3) | 44.7<br>(21.8–60.6) | 6.5<br>(0.1–20.6) | 5.2<br>(0.1–17.9) | 0.4<br>(0.1–0.9)        | 0.4<br>(0.1–0.9)    | 10.1<br>(7.8–13.0)  | 13.2<br>(10.3–16.6) | 2.3<br>(0.9–3.7) | 2.3<br>(0.9–3.7) | 8.2<br>(6.4–10.6)  | 10.4<br>(8.0–13.2) | 4.4<br>(2.0–7.9)           | 4.4<br>(2.2–7.9)   | 2.9<br>(1.3–6.3)  | 2.7<br>(1.2–5.9)  | 7.7<br>(5.2–10.7)           | 7.2<br>(4.8–10.2)  | 16.4<br>(10.2–23.1) | 16.9<br>(10.4–23.4) | 0.1<br>(<0.1–0.3)   | 0.1<br>(<0.1–0.3)   | 8.0<br>(4.5–11.6)   | 8.0<br>(4.5–11.6)   |
| Western Europe            | 39.7<br>(17.6–56.0) | 36.9<br>(15.4–53.9) | 1.6<br>(0.0–6.4)  | 2.0<br>(0.0–7.8)  | <0.1<br>(<0.1–0.1)      | <0.1<br>(<0.1–0.1)  | 12.9<br>(11.2–14.7) | 12.4<br>(10.8–14.3) | 1.0<br>(0.4–1.7) | 1.0<br>(0.4–1.7) | 10.3<br>(8.9–11.8) | 10.4<br>(9.1–12.0) | 5.8<br>(3.7–8.9)           | 5.8<br>(3.7–8.9)   | 1.4<br>(0.5–3.4)  | 1.7<br>(0.6–3.9)  | 9.7<br>(7.2–12.3)           | 9.0<br>(6.7–11.5)  | 14.4<br>(9.1–20.0)  | 14.5<br>(8.9–20.0)  | 0.1<br>(<0.1–0.3)   | 0.1<br>(<0.1–0.3)   | 20.9<br>(14.6–27.4) | 20.7<br>(14.6–27.2) |
| Andorra                   | 40.6<br>(18.2–58.1) | 38.6<br>(15.1–57.7) | 1.6<br>(0.0–6.5)  | 2.1<br>(0.0–8.5)  | <0.1<br>(<0.1–<0.1)     | <0.1<br>(<0.1–<0.1) | 11.1<br>(6.6–17.9)  | 7.8<br>(4.5–13.0)   | 1.0<br>(0.4–1.6) | 1.0<br>(0.4–1.6) | 8.9<br>(5.2–14.5)  | 6.5<br>(3.8–10.7)  | 4.2<br>(2.0–7.7)           | 4.0<br>(1.9–7.2)   | 1.4<br>(0.5–3.3)  | 1.7<br>(0.7–4.2)  | 6.8<br>(4.2–10.1)           | 4.8<br>(2.8–7.6)   | 15.6<br>(9.8–22.1)  | 15.7<br>(10.1–21.9) | <0.1<br>(<0.1–<0.1) | <0.1<br>(<0.1–<0.1) | 17.0<br>(1.9–35.8)  | 17.0<br>(1.9–35.8)  |

|            | Child wasting       |                     | Child stunting   |                  | Household air pollution |                     | Low birth weight    |                     | Handwashing      |                  | Short gestation     |                     | Ambient particulate matter |                    | Child underweight |                  | Non-exclusive breastfeeding |                    | Secondhand smoke    |                     | High temperature    |                     | Low temperature     |                     |
|------------|---------------------|---------------------|------------------|------------------|-------------------------|---------------------|---------------------|---------------------|------------------|------------------|---------------------|---------------------|----------------------------|--------------------|-------------------|------------------|-----------------------------|--------------------|---------------------|---------------------|---------------------|---------------------|---------------------|---------------------|
|            | M                   | F                   | M                | F                | M                       | F                   | M                   | F                   | M                | F                | M                   | F                   | M                          | F                  | M                 | F                | M                           | F                  | M                   | F                   | M                   | F                   | M                   | F                   |
| Austria    | 39.6<br>(17.7–55.7) | 38.8<br>(16.6–55.8) | 1.6<br>(0.0–6.1) | 2.0<br>(0.0–7.8) | <0.1<br>(<0.1–0.1)      | <0.1<br>(<0.1–0.1)  | 13.9<br>(10.1–18.7) | 13.1<br>(9.5–17.6)  | 1.0<br>(0.4–1.6) | 1.0<br>(0.4–1.6) | 11.9<br>(8.6–16.1)  | 11.3<br>(8.2–15.3)  | 6.3<br>(3.5–10.4)          | 6.2<br>(3.6–9.8)   | 1.4<br>(0.5–3.4)  | 1.6<br>(0.7–3.9) | 8.0<br>(5.2–11.0)           | 8.8<br>(5.9–11.9)  | 19.9<br>(13.4–26.7) | 20.0<br>(13.6–26.9) | <0.1<br>(<0.1–0.1)  | <0.1<br>(<0.1–0.1)  | 19.7<br>(10.6–31.5) | 19.7<br>(10.6–31.5) |
| Belgium    | 43.3<br>(19.1–61.0) | 40.4<br>(16.4–59.1) | 1.7<br>(0.0–6.7) | 2.2<br>(0.0–8.5) | <0.1<br>(<0.1–<0.1)     | <0.1<br>(<0.1–<0.1) | 10.5<br>(7.8–13.9)  | 7.8<br>(5.7–10.3)   | 1.0<br>(0.4–1.6) | 1.0<br>(0.4–1.6) | 7.8<br>(5.7–10.4)   | 6.2<br>(4.5–8.2)    | 6.3<br>(3.8–10.0)          | 6.3<br>(3.7–9.9)   | 1.5<br>(0.5–3.6)  | 1.8<br>(0.7–4.3) | 8.7<br>(5.9–11.7)           | 6.3<br>(4.1–8.7)   | 14.9<br>(9.2–20.7)  | 14.8<br>(9.5–20.5)  | <0.1<br>(<0.1–0.1)  | <0.1<br>(<0.1–0.1)  | 23.4<br>(14.7–32.7) | 23.4<br>(14.7–32.7) |
| Cyprus     | 36.9<br>(17.4–52.6) | 34.5<br>(14.8–50.9) | 1.5<br>(0.0–5.5) | 1.9<br>(0.0–7.2) | <0.1<br>(<0.1–0.1)      | <0.1<br>(<0.1–0.1)  | 24.1<br>(16.7–32.4) | 22.5<br>(15.7–30.2) | 1.0<br>(0.4–1.6) | 1.0<br>(0.4–1.6) | 14.9<br>(10.3–20.2) | 14.6<br>(10.3–19.9) | 8.2<br>(5.0–12.7)          | 8.2<br>(4.9–12.7)  | 1.3<br>(0.5–3.1)  | 1.6<br>(0.6–3.7) | 10.5<br>(7.2–14.1)          | 9.3<br>(6.4–12.7)  | 18.4<br>(11.7–25.1) | 18.3<br>(12.0–24.6) | 2.1<br>(0.9–3.6)    | 2.1<br>(0.9–3.6)    | 4.5<br>(<0.1–10.9)  | 4.5<br>(<0.1–10.9)  |
| Denmark    | 42.7<br>(19.5–60.5) | 36.1<br>(15.8–52.9) | 1.7<br>(0.0–6.7) | 1.9<br>(0.0–7.4) | <0.1<br>(<0.1–<0.1)     | <0.1<br>(<0.1–<0.1) | 6.8<br>(4.6–9.3)    | 10.2<br>(7.1–13.9)  | 1.0<br>(0.4–1.6) | 1.0<br>(0.4–1.6) | 8.2<br>(5.8–11.2)   | 13.0<br>(9.2–17.4)  | 4.7<br>(2.4–8.0)           | 5.1<br>(2.4–9.0)   | 1.5<br>(0.5–3.5)  | 1.6<br>(0.6–3.8) | 9.2<br>(6.3–12.5)           | 8.8<br>(6.1–11.8)  | 14.2<br>(8.9–19.9)  | 14.9<br>(9.5–20.5)  | <0.1<br>(<0.1–<0.1) | <0.1<br>(<0.1–<0.1) | 23.2<br>(13.0–34.4) | 23.2<br>(13.0–34.4) |
| Finland    | 38.7<br>(18.5–54.3) | 35.3<br>(15.4–51.3) | 1.5<br>(0.0–6.3) | 1.9<br>(0.0–7.1) | <0.1<br>(<0.1–0.1)      | <0.1<br>(<0.1–0.1)  | 14.7<br>(11.0–19.0) | 15.3<br>(11.6–19.6) | 1.0<br>(0.4–1.7) | 1.0<br>(0.4–1.7) | 11.7<br>(8.8–15.3)  | 13.4<br>(10.1–17.3) | 2.0<br>(0.3–4.6)           | 2.2<br>(0.3–5.1)   | 1.4<br>(0.5–3.3)  | 1.6<br>(0.6–3.7) | 9.3<br>(6.5–12.5)           | 8.7<br>(5.9–11.8)  | 12.5<br>(7.5–17.6)  | 12.5<br>(7.5–17.3)  | <0.1<br>(<0.1–0.3)  | <0.1<br>(<0.1–0.3)  | 17.9<br>(3.8–36.4)  | 17.9<br>(3.8–36.4)  |
| France     | 41.7<br>(19.1–58.9) | 39.5<br>(16.7–56.9) | 1.7<br>(0.0–6.6) | 2.1<br>(0.0–8.1) | <0.1<br>(<0.1–0.1)      | <0.1<br>(<0.1–<0.1) | 9.2<br>(6.6–12.3)   | 7.9<br>(5.8–10.4)   | 1.0<br>(0.4–1.7) | 1.0<br>(0.4–1.7) | 7.8<br>(5.5–10.5)   | 7.1<br>(5.1–9.4)    | 5.7<br>(3.2–9.0)           | 5.6<br>(3.2–8.9)   | 1.5<br>(0.5–3.4)  | 1.7<br>(0.7–4.1) | 8.2<br>(5.8–11.0)           | 7.2<br>(4.9–9.7)   | 13.6<br>(7.8–19.8)  | 13.9<br>(8.1–19.8)  | <0.1<br>(<0.1–0.1)  | <0.1<br>(<0.1–0.1)  | 21.7<br>(14.9–28.4) | 21.7<br>(14.9–28.4) |
| Germany    | 32.5<br>(11.7–50.5) | 30.5<br>(10.3–48.8) | 1.4<br>(0.0–5.9) | 2.0<br>(0.0–7.5) | <0.1<br>(<0.1–<0.1)     | <0.1<br>(<0.1–<0.1) | 10.8<br>(8.0–14.2)  | 9.0<br>(6.7–11.7)   | 1.0<br>(0.4–1.6) | 1.0<br>(0.4–1.6) | 9.4<br>(7.0–12.5)   | 8.3<br>(6.2–10.8)   | 5.9<br>(3.5–9.5)           | 5.9<br>(3.4–9.4)   | 1.7<br>(0.6–3.9)  | 1.7<br>(0.7–4.1) | 9.1<br>(6.5–12.3)           | 7.8<br>(5.4–10.6)  | 15.6<br>(9.9–22.0)  | 14.3<br>(8.6–20.2)  | <0.1<br>(<0.1–0.2)  | <0.1<br>(<0.1–0.2)  | 22.5<br>(14.3–31.1) | 22.5<br>(14.3–31.1) |
| Greece     | 46.1<br>(21.3–64.7) | 45.4<br>(19.8–64.8) | 1.8<br>(0.0–7.4) | 2.4<br>(0.0–9.7) | 0.1<br>(<0.1–0.2)       | 0.1<br>(<0.1–0.2)   | 7.1<br>(4.8–9.9)    | 4.7<br>(3.2–6.5)    | 1.0<br>(0.4–1.7) | 1.0<br>(0.4–1.7) | 5.4<br>(3.6–7.5)    | 3.8<br>(2.6–5.3)    | 7.2<br>(4.3–11.1)          | 7.1<br>(4.2–10.9)  | 1.6<br>(0.6–3.7)  | 1.9<br>(0.8–4.5) | 11.5<br>(8.4–15.2)          | 11.4<br>(8.3–15.0) | 20.7<br>(13.5–27.7) | 20.8<br>(13.6–28.1) | 0.1<br>(<0.1–0.3)   | 0.1<br>(<0.1–0.3)   | 15.7<br>(12.3–19.4) | 15.7<br>(12.3–19.4) |
| Iceland    | 36.9<br>(16.2–52.3) | 39.3<br>(17.0–57.1) | 1.5<br>(0.0–5.8) | 2.1<br>(0.0–8.1) | <0.1<br>(<0.1–<0.1)     | <0.1<br>(<0.1–<0.1) | 16.4<br>(12.5–21.2) | 11.1<br>(8.2–14.4)  | 1.0<br>(0.4–1.7) | 1.0<br>(0.4–1.7) | 13.4<br>(10.0–17.3) | 9.4<br>(6.9–12.5)   | 2.3<br>(0.4–5.2)           | 1.9<br>(0.3–4.1)   | 1.3<br>(0.5–3.1)  | 1.7<br>(0.7–4.0) | 7.4<br>(5.0–9.9)            | 7.8<br>(5.4–10.4)  | 17.1<br>(11.2–23.4) | 17.9<br>(12.1–24.3) | <0.1<br>(0.0–0.0)   | <0.1<br>(0.0–0.0)   | 21.5<br>(5.1–38.7)  | 21.5<br>(5.1–38.7)  |
| Ireland    | 37.7<br>(16.9–53.5) | 33.9<br>(14.7–49.3) | 1.5<br>(0.0–5.7) | 1.8<br>(0.0–7.0) | <0.1<br>(<0.1–<0.1)     | <0.1<br>(<0.1–0.1)  | 15.3<br>(11.2–20.2) | 17.1<br>(12.8–22.2) | 1.0<br>(0.4–1.6) | 1.0<br>(0.4–1.6) | 12.4<br>(9.1–16.8)  | 14.7<br>(10.9–19.2) | 3.6<br>(1.5–7.0)           | 3.7<br>(1.5–7.1)   | 1.3<br>(0.4–3.0)  | 1.4<br>(0.5–3.3) | 8.2<br>(5.6–11.2)           | 8.2<br>(5.5–11.1)  | 12.1<br>(7.2–17.4)  | 12.4<br>(7.3–17.7)  | <0.1<br>(0.0–0.0)   | <0.1<br>(0.0–0.0)   | 25.7<br>(14.4–37.2) | 25.7<br>(14.4–37.2) |
| Israel     | 40.0<br>(17.9–57.0) | 39.4<br>(16.9–57.2) | 1.6<br>(0.0–6.0) | 2.1<br>(0.0–8.1) | <0.1<br>(<0.1–0.1)      | <0.1<br>(<0.1–0.1)  | 13.5<br>(10.2–17.4) | 11.8<br>(8.6–15.3)  | 1.0<br>(0.4–1.7) | 1.0<br>(0.4–1.7) | 11.5<br>(8.5–14.8)  | 10.2<br>(7.5–13.5)  | 10.7<br>(6.9–15.6)         | 10.6<br>(6.8–15.8) | 1.4<br>(0.5–3.3)  | 1.7<br>(0.7–4.0) | 8.1<br>(5.5–10.9)           | 8.9<br>(6.1–11.9)  | 13.2<br>(7.8–18.7)  | 13.5<br>(8.0–18.8)  | 2.1<br>(0.8–3.9)    | 2.1<br>(0.8–3.9)    | 3.5<br>(<0.1–10.4)  | 3.5<br>(<0.1–10.4)  |
| Italy      | 40.4<br>(18.4–56.6) | 37.0<br>(15.7–53.4) | 1.6<br>(0.0–6.7) | 1.9<br>(0.0–7.5) | <0.1<br>(<0.1–0.1)      | <0.1<br>(<0.1–0.1)  | 14.6<br>(12.3–16.7) | 15.0<br>(12.8–17.2) | 1.0<br>(0.4–1.7) | 1.0<br>(0.4–1.7) | 10.9<br>(9.1–12.5)  | 11.9<br>(10.1–13.6) | 8.2<br>(5.4–12.2)          | 8.4<br>(5.5–12.5)  | 1.4<br>(0.5–3.2)  | 1.6<br>(0.6–3.7) | 11.6<br>(8.7–14.6)          | 10.6<br>(7.9–13.3) | 14.5<br>(9.1–20.0)  | 15.0<br>(9.6–21.0)  | 0.1<br>(<0.1–0.2)   | 0.1<br>(<0.1–0.2)   | 17.1<br>(13.0–21.2) | 17.2<br>(13.0–21.3) |
| Luxembourg | 39.6<br>(17.9–56.2) | 39.5<br>(16.3–57.1) | 1.6<br>(0.0–5.9) | 2.1<br>(0.0–8.2) | <0.1<br>(<0.1–<0.1)     | <0.1<br>(<0.1–<0.1) | 15.1<br>(11.0–19.9) | 10.3<br>(7.6–13.8)  | 1.0<br>(0.4–1.6) | 1.0<br>(0.4–1.6) | 12.2<br>(8.9–16.2)  | 8.5<br>(6.2–11.4)   | 5.0<br>(2.6–8.3)           | 4.7<br>(2.5–7.9)   | 1.4<br>(0.5–3.4)  | 1.8<br>(0.7–4.2) | 8.7<br>(6.2–11.5)           | 7.0<br>(4.8–9.4)   | 15.7<br>(10.0–22.0) | 15.2<br>(9.8–21.2)  | <0.1<br>(<0.1–0.1)  | <0.1<br>(<0.1–0.1)  | 23.1<br>(13.3–33.6) | 23.1<br>(13.3–33.6) |

|                                    | Child wasting               |                             | Child stunting            |                           | Household air pollution    |                            | Low birth weight            |                             | Handwashing               |                           | Short gestation           |                           | Ambient particulate matter |                           | Child underweight        |                          | Non-exclusive breastfeeding |                           | Secondhand smoke         |                          | High temperature             |                              | Low temperature          |                          |
|------------------------------------|-----------------------------|-----------------------------|---------------------------|---------------------------|----------------------------|----------------------------|-----------------------------|-----------------------------|---------------------------|---------------------------|---------------------------|---------------------------|----------------------------|---------------------------|--------------------------|--------------------------|-----------------------------|---------------------------|--------------------------|--------------------------|------------------------------|------------------------------|--------------------------|--------------------------|
|                                    | M                           | F                           | M                         | F                         | M                          | F                          | M                           | F                           | M                         | F                         | M                         | F                         | M                          | F                         | M                        | F                        | M                           | F                         | M                        | F                        | M                            | F                            | M                        | F                        |
| Malta                              | 42.1<br>(19.1–58.3)         | 39.4<br>(17.1–56.1)         | 1.7<br>(0.0–6.7)          | 2.1<br>(0.0–8.2)          | <0.1<br>(<0.1–0.1)         | <0.1<br>(<0.1–0.1)         | 14.3<br>(10.6–18.7)         | 13.3<br>(9.9–17.5)          | 1.0<br>(0.4–1.7)          | 1.0<br>(0.4–1.7)          | 11.4<br>(8.4–15.2)        | 11.3<br>(8.2–15.0)        | 6.7<br>(3.9–10.4)          | 6.7<br>(3.8–10.4)         | 1.5<br>(0.5–3.5)         | 1.7<br>(0.7–4.0)         | 9.3<br>(6.5–12.5)           | 8.6<br>(5.9–11.5)         | 16.7<br>(11.0–23.0)      | 17.2<br>(11.3–23.7)      | 0.3<br>(<0.1–0.9)            | 0.3<br>(<0.1–0.9)            | 3.6<br>(<0.1–15.0)       | 3.6<br>(<0.1–15.0)       |
| Monaco                             | 48.0<br>(22.4–66.1)         | 39.1<br>(15.0–59.3)         | 1.9<br>(0.0–7.6)          | 2.1<br>(0.0–8.2)          | <0.1<br>(<0.1–<0.1)        | <0.1<br>(<0.1–<0.1)        | 5.3<br>(2.6–9.6)            | 5.5<br>(3.0–9.1)            | 1.0<br>(0.4–1.6)          | 1.0<br>(0.4–1.6)          | 4.3<br>(2.1–7.9)          | 4.6<br>(2.6–7.7)          | 5.5<br>(2.8–9.4)           | 5.6<br>(2.8–9.4)          | 1.6<br>(0.6–3.8)         | 1.7<br>(0.7–4.0)         | 10.3<br>(7.1–13.8)          | 3.9<br>(2.0–6.4)          | 15.8<br>(9.6–22.0)       | 16.1<br>(10.4–22.3)      | <0.1<br>(<0.1–0.1)           | <0.1<br>(<0.1–0.1)           | 15.4<br>(11.9–19.0)      | 15.4<br>(11.9–19.0)      |
| Netherlands                        | 40.0<br>(17.8–56.4)         | 38.9<br>(16.5–56.8)         | 1.6<br>(0.0–6.2)          | 2.0<br>(0.0–7.6)          | <0.1<br>(<0.1–<0.1)        | <0.1<br>(<0.1–<0.1)        | 13.9<br>(10.4–17.9)         | 12.2<br>(9.1–16.0)          | 1.0<br>(0.4–1.6)          | 1.0<br>(0.4–1.6)          | 10.8<br>(8.0–13.9)        | 10.0<br>(7.4–13.1)        | 6.2<br>(3.5–10.0)          | 6.1<br>(3.4–9.6)          | 1.4<br>(0.5–3.3)         | 1.7<br>(0.7–3.9)         | 12.7<br>(9.3–16.3)          | 12.7<br>(9.3–16.4)        | 13.1<br>(8.0–18.7)       | 13.5<br>(8.2–19.3)       | <0.1<br>(<0.1–0.1)           | <0.1<br>(<0.1–0.1)           | 23.6<br>(13.4–33.5)      | 23.6<br>(13.4–33.5)      |
| Norway                             | 39.9<br>(17.6–56.2)         | 37.2<br>(15.8–53.7)         | 1.6<br>(0.0–6.2)          | 1.9<br>(0.0–7.7)          | <0.1<br>(<0.1–<0.1)        | <0.1<br>(<0.1–<0.1)        | 12.2<br>(10.9–13.6)         | 12.8<br>(11.5–14.2)         | 1.0<br>(0.4–1.6)          | 1.0<br>(0.4–1.6)          | 10.3<br>(9.2–11.5)        | 10.8<br>(9.8–11.9)        | 2.6<br>(1.4–4.4)           | 2.7<br>(1.4–4.6)          | 1.4<br>(0.5–3.3)         | 1.6<br>(0.6–3.7)         | 6.3<br>(4.1–8.6)            | 6.4<br>(4.3–8.8)          | 12.8<br>(7.6–18.3)       | 13.4<br>(8.4–19.1)       | <0.1<br>(<0.1–0.1)           | <0.1<br>(<0.1–0.1)           | 19.0<br>(5.8–35.9)       | 18.9<br>(5.6–35.9)       |
| Portugal                           | 37.0<br>(16.9–51.9)         | 32.7<br>(13.7–47.8)         | 1.5<br>(0.0–6.2)          | 1.8<br>(0.0–7.2)          | 0.1<br>(<0.1–0.2)          | 0.1<br>(<0.1–0.2)          | 19.9<br>(15.1–25.5)         | 22.1<br>(17.2–27.7)         | 1.1<br>(0.4–1.8)          | 1.1<br>(0.4–1.8)          | 13.9<br>(10.5–17.7)       | 16.3<br>(12.6–20.5)       | 3.8<br>(1.7–6.7)           | 3.9<br>(1.6–6.9)          | 1.3<br>(0.5–3.1)         | 1.5<br>(0.6–3.5)         | 11.7<br>(8.6–15.4)          | 11.7<br>(8.7–15.4)        | 12.8<br>(7.6–18.0)       | 13.0<br>(7.7–18.3)       | 0.2<br>(<0.1–0.3)            | 0.2<br>(<0.1–0.3)            | 15.3<br>(11.7–19.2)      | 15.3<br>(11.7–19.2)      |
| San Marino                         | 42.0<br>(18.2–61.0)         | 38.4<br>(15.9–56.5)         | 1.7<br>(0.0–6.7)          | 2.1<br>(0.0–8.3)          | <0.1<br>(<0.1–<0.1)        | <0.1<br>(<0.1–<0.1)        | 10.1<br>(5.9–15.9)          | 9.2<br>(5.2–14.4)           | 1.0<br>(0.4–1.7)          | 1.0<br>(0.4–1.7)          | 8.1<br>(4.6–13.0)         | 7.7<br>(4.4–12.1)         | 4.6<br>(2.0–8.2)           | 4.6<br>(1.9–8.4)          | 1.5<br>(0.6–3.6)         | 1.8<br>(0.7–4.1)         | 6.3<br>(3.6–9.2)            | 5.1<br>(2.9–8.1)          | 17.1<br>(11.2–23.8)      | 17.4<br>(11.3–23.8)      | 0.1<br>(<0.1–0.2)            | 0.1<br>(<0.1–0.2)            | 15.7<br>(12.5–19.0)      | 15.7<br>(12.5–19.0)      |
| Spain                              | 36.2<br>(15.2–52.7)         | 32.8<br>(12.1–50.2)         | 1.4<br>(0.0–5.5)          | 1.8<br>(0.0–7.1)          | 0.1<br>(<0.1–0.3)          | 0.1<br>(<0.1–0.3)          | 17.0<br>(11.3–23.4)         | 15.4<br>(10.0–21.4)         | 1.0<br>(0.4–1.7)          | 1.0<br>(0.4–1.7)          | 11.7<br>(7.8–16.0)        | 10.5<br>(6.8–14.7)        | 4.7<br>(2.5–8.1)           | 4.6<br>(2.5–7.6)          | 1.1<br>(0.3–2.5)         | 1.6<br>(0.6–3.7)         | 11.7<br>(8.5–15.4)          | 11.6<br>(8.4–15.2)        | 16.3<br>(10.2–22.4)      | 16.2<br>(10.0–22.3)      | 0.2<br>(<0.1–0.5)            | 0.2<br>(<0.1–0.5)            | 17.3<br>(13.3–21.5)      | 17.3<br>(13.3–21.5)      |
| Sweden                             | 41.1<br>(18.4–57.4)         | 39.1<br>(16.1–57.0)         | 1.6<br>(0.0–6.2)          | 2.0<br>(0.0–8.2)          | <0.1<br>(<0.1–<0.1)        | <0.1<br>(<0.1–<0.1)        | 10.8<br>(8.2–13.9)          | 9.6<br>(7.5–12.2)           | 1.0<br>(0.4–1.7)          | 1.0<br>(0.4–1.7)          | 9.8<br>(7.4–12.6)         | 9.2<br>(7.1–11.7)         | 2.2<br>(0.6–4.6)           | 2.1<br>(0.6–4.3)          | 1.4<br>(0.5–3.4)         | 1.7<br>(0.7–4.0)         | 8.3<br>(5.7–11.1)           | 8.0<br>(5.5–10.5)         | 10.2<br>(6.3–15.0)       | 10.4<br>(6.5–14.8)       | <0.1<br>(<0.1–0.1)           | <0.1<br>(<0.1–0.1)           | 18.5<br>(5.2–32.8)       | 18.5<br>(5.2–32.8)       |
| Switzerland                        | 40.2<br>(18.2–56.3)         | 34.0<br>(14.8–49.6)         | 1.6<br>(0.0–6.1)          | 1.8<br>(0.0–6.8)          | <0.1<br>(<0.1–<0.1)        | <0.1<br>(<0.1–<0.1)        | 14.5<br>(10.9–19.3)         | 19.1<br>(14.3–24.8)         | 1.0<br>(0.4–1.6)          | 1.0<br>(0.4–1.6)          | 11.6<br>(8.5–15.5)        | 16.6<br>(12.4–21.9)       | 4.8<br>(2.4–8.3)           | 5.2<br>(2.7–9.3)          | 1.4<br>(0.5–3.2)         | 1.5<br>(0.6–3.5)         | 9.3<br>(6.6–12.4)           | 8.6<br>(6.0–11.5)         | 13.9<br>(8.3–19.6)       | 14.1<br>(8.4–19.9)       | <0.1<br>(<0.1–<0.1)          | <0.1<br>(<0.1–<0.1)          | 21.1<br>(11.3–32.9)      | 21.1<br>(11.3–32.9)      |
| United Kingdom                     | 40.9<br>(18.9–57.1)         | 37.7<br>(16.5–54.5)         | 1.7<br>(0.0–6.6)          | 2.0<br>(0.0–7.7)          | <0.1<br>(<0.1–<0.1)        | <0.1<br>(<0.1–<0.1)        | 13.8<br>(10.6–17.6)         | 14.4<br>(11.1–18.4)         | 1.0<br>(0.4–1.7)          | 1.0<br>(0.4–1.7)          | 11.2<br>(8.5–14.3)        | 12.3<br>(9.5–15.7)        | 5.1<br>(3.3–8.0)           | 5.2<br>(3.4–8.2)          | 1.4<br>(0.5–3.4)         | 1.7<br>(0.6–4.0)         | 9.3<br>(6.5–12.4)           | 8.6<br>(6.0–11.5)         | 13.5<br>(8.4–19.3)       | 13.7<br>(8.2–19.2)       | <0.1<br>(<0.1–<0.1)          | <0.1<br>(<0.1–<0.1)          | 24.8<br>(15.7–34.9)      | 24.8<br>(15.9–34.9)      |
| <b>Latin America and Caribbean</b> | <b>47.1<br/>(25.8–61.3)</b> | <b>47.2<br/>(25.8–61.5)</b> | <b>8.0<br/>(0.3–23.6)</b> | <b>8.6<br/>(0.2–25.0)</b> | <b>11.7<br/>(6.5–18.1)</b> | <b>11.6<br/>(6.4–18.5)</b> | <b>13.6<br/>(11.9–15.6)</b> | <b>12.1<br/>(10.4–14.1)</b> | <b>9.1<br/>(3.9–14.2)</b> | <b>9.1<br/>(3.8–14.2)</b> | <b>9.5<br/>(8.3–11.0)</b> | <b>8.8<br/>(7.5–10.3)</b> | <b>8.7<br/>(5.9–12.6)</b>  | <b>8.8<br/>(5.9–12.6)</b> | <b>4.4<br/>(2.5–9.2)</b> | <b>4.6<br/>(2.6–9.5)</b> | <b>9.4<br/>(6.2–13.1)</b>   | <b>8.9<br/>(5.8–12.3)</b> | <b>5.4<br/>(2.8–8.5)</b> | <b>5.4<br/>(2.7–8.3)</b> | <b>1.3<br/>(&lt;0.1–4.4)</b> | <b>1.3<br/>(&lt;0.1–4.6)</b> | <b>2.8<br/>(1.3–4.4)</b> | <b>3.0<br/>(1.5–4.5)</b> |
| Andean Latin America               | 37.6<br>(17.3–53.3)         | 37.7<br>(17.8–53.6)         | 8.1<br>(0.2–25.3)         | 8.4<br>(<0.1–26.2)        | 5.4<br>(2.3–10.3)          | 5.5<br>(2.4–10.5)          | 11.0<br>(8.4–14.2)          | 10.2<br>(7.9–13.3)          | 7.9<br>(3.3–12.5)         | 7.9<br>(3.3–12.5)         | 7.8<br>(5.9–10.1)         | 7.8<br>(6.0–10.0)         | 12.8<br>(8.0–19.3)         | 12.9<br>(8.1–19.4)        | 3.3<br>(1.6–7.4)         | 3.3<br>(1.5–7.5)         | 6.1<br>(3.4–9.2)            | 5.8<br>(3.2–8.9)          | 2.9<br>(1.0–5.2)         | 2.9<br>(1.1–5.3)         | 0.8<br>(0.2–1.8)             | 0.8<br>(0.2–1.9)             | 8.9<br>(5.6–12.3)        | 8.9<br>(5.6–12.4)        |
| Bolivia (Plurinational State of)   | 39.6<br>(18.7–56.3)         | 43.2<br>(22.7–59.7)         | 7.6<br>(0.1–25.3)         | 8.9<br>(0.0–27.6)         | 7.8<br>(3.3–14.5)          | 7.8<br>(3.4–14.5)          | 9.9<br>(6.1–14.7)           | 8.3<br>(5.0–13.4)           | 8.4<br>(3.5–13.2)         | 8.4<br>(3.5–13.2)         | 6.8<br>(4.2–10.3)         | 6.7<br>(4.1–10.5)         | 12.4<br>(7.4–19.3)         | 12.4<br>(7.5–19.3)        | 3.0<br>(1.3–6.9)         | 3.5<br>(1.7–8.1)         | 6.4<br>(3.3–10.0)           | 6.1<br>(3.2–9.8)          | 2.7<br>(0.9–5.0)         | 2.7<br>(1.0–5.2)         | 1.5<br>(0.5–2.7)             | 1.5<br>(0.5–2.7)             | 9.1<br>(5.9–12.6)        | 9.1<br>(5.9–12.6)        |

|                     | Child wasting       |                     | Child stunting     |                    | Household air pollution |                     | Low birth weight    |                     | Handwashing        |                    | Short gestation     |                     | Ambient particulate matter |                    | Child underweight |                   | Non-exclusive breastfeeding |                    | Secondhand smoke   |                    | High temperature  |                   | Low temperature    |                    |
|---------------------|---------------------|---------------------|--------------------|--------------------|-------------------------|---------------------|---------------------|---------------------|--------------------|--------------------|---------------------|---------------------|----------------------------|--------------------|-------------------|-------------------|-----------------------------|--------------------|--------------------|--------------------|-------------------|-------------------|--------------------|--------------------|
|                     | M                   | F                   | M                  | F                  | M                       | F                   | M                   | F                   | M                  | F                  | M                   | F                   | M                          | F                  | M                 | F                 | M                           | F                  | M                  | F                  | M                 | F                 | M                  | F                  |
| Ecuador             | 51.1<br>(27.4–67.2) | 44.1<br>(22.2–59.9) | 9.3<br>(0.3–27.2)  | 8.0<br>(0.2–25.0)  | 1.3<br>(0.4–3.0)        | 1.3<br>(0.4–3.0)    | 8.7<br>(6.1–12.1)   | 11.7<br>(8.8–15.3)  | 6.9<br>(2.8–11.0)  | 6.9<br>(2.8–11.0)  | 6.0<br>(4.1–8.7)    | 7.6<br>(5.7–10.1)   | 10.4<br>(5.8–16.4)         | 10.3<br>(5.8–16.3) | 4.1<br>(2.2–8.9)  | 3.4<br>(1.6–8.0)  | 7.9<br>(4.9–11.2)           | 7.4<br>(4.5–10.7)  | 2.7<br>(0.9–5.2)   | 2.8<br>(1.0–5.3)   | 0.3<br>(<0.1–1.2) | 0.3<br>(<0.1–1.2) | 5.8<br>(3.6–8.1)   | 5.8<br>(3.6–8.1)   |
| Peru                | 26.3<br>(9.7–42.2)  | 26.2<br>(9.2–42.1)  | 8.0<br>(0.1–25.4)  | 7.9<br>(<0.1–24.8) | 4.5<br>(1.8–8.9)        | 4.5<br>(1.8–8.9)    | 14.3<br>(9.5–20.0)  | 12.4<br>(8.5–17.7)  | 7.9<br>(3.3–12.5)  | 7.9<br>(3.3–12.5)  | 10.5<br>(7.0–15.1)  | 9.8<br>(6.5–14.1)   | 15.0<br>(9.5–22.3)         | 15.0<br>(9.5–22.3) | 3.4<br>(1.7–7.7)  | 2.9<br>(1.2–6.9)  | 4.6<br>(2.2–7.5)            | 4.4<br>(2.0–7.4)   | 3.1<br>(1.1–5.8)   | 3.1<br>(1.2–5.8)   | 0.2<br>(<0.1–0.9) | 0.2<br>(<0.1–0.9) | 10.4<br>(6.0–15.2) | 10.4<br>(6.0–15.2) |
| Caribbean           | 49.0<br>(29.1–64.1) | 45.5<br>(27.6–60.4) | 8.0<br>(0.3–23.3)  | 8.1<br>(0.4–22.6)  | 34.1<br>(20.9–47.1)     | 34.1<br>(20.9–46.9) | 22.1<br>(14.7–30.8) | 24.6<br>(16.6–33.8) | 18.8<br>(8.4–28.2) | 18.8<br>(8.4–28.0) | 15.3<br>(10.0–21.5) | 17.3<br>(11.7–24.1) | 5.8<br>(2.7–10.9)          | 5.8<br>(2.7–10.9)  | 6.5<br>(3.8–13.0) | 5.9<br>(3.5–11.9) | 8.8<br>(5.4–12.6)           | 9.1<br>(5.6–12.9)  | 3.6<br>(1.7–5.8)   | 3.6<br>(1.8–5.8)   | 0.8<br>(<0.1–2.9) | 0.8<br>(<0.1–2.9) | <0.1<br>(<0.1–1.3) | <0.1<br>(<0.1–1.3) |
| Antigua and Barbuda | 44.0<br>(23.8–58.5) | 48.3<br>(26.1–63.7) | 4.1<br>(0.0–15.0)  | 5.1<br>(0.0–17.9)  | 0.2<br>(<0.1–0.4)       | 0.2<br>(<0.1–0.4)   | 19.7<br>(14.5–25.7) | 14.0<br>(9.8–19.2)  | 7.5<br>(3.1–11.9)  | 7.5<br>(3.1–11.9)  | 13.7<br>(10.1–18.0) | 10.3<br>(7.1–14.2)  | 9.2<br>(3.5–18.4)          | 9.1<br>(3.5–18.4)  | 2.7<br>(1.3–6.0)  | 3.5<br>(1.6–7.5)  | 9.2<br>(5.4–13.9)           | 8.7<br>(4.9–13.3)  | 6.3<br>(3.6–9.5)   | 6.6<br>(3.8–9.7)   | 0.4<br>(<0.1–2.3) | 0.4<br>(<0.1–2.3) | 0.3<br>(<0.1–1.7)  | 0.3<br>(<0.1–1.7)  |
| Bahamas             | 48.0<br>(27.1–62.3) | 45.9<br>(26.5–60.1) | 4.2<br>(0.0–15.2)  | 4.6<br>(<0.1–15.5) | 0.2<br>(<0.1–0.5)       | 0.2<br>(<0.1–0.5)   | 17.5<br>(13.5–22.2) | 18.9<br>(14.3–24.5) | 6.3<br>(2.6–10.2)  | 6.3<br>(2.6–10.2)  | 12.6<br>(9.6–16.3)  | 14.0<br>(10.6–18.0) | 8.0<br>(2.6–16.5)          | 8.1<br>(2.7–16.4)  | 2.8<br>(1.3–6.4)  | 3.2<br>(1.6–7.1)  | 10.5<br>(6.5–14.9)          | 11.2<br>(7.0–15.8) | 7.6<br>(4.3–11.3)  | 7.8<br>(4.6–11.3)  | 1.6<br>(<0.1–4.5) | 1.6<br>(<0.1–4.5) | 0.3<br>(<0.1–2.0)  | 0.3<br>(<0.1–2.0)  |
| Barbados            | 39.5<br>(23.2–51.9) | 39.2<br>(21.5–52.4) | 4.4<br>(0.1–13.9)  | 3.7<br>(0.1–11.9)  | <0.1<br>(<0.1–<0.1)     | <0.1<br>(<0.1–<0.1) | 29.0<br>(23.1–35.2) | 23.6<br>(18.6–29.0) | 7.1<br>(2.9–11.4)  | 7.1<br>(2.9–11.4)  | 21.1<br>(16.6–25.9) | 18.0<br>(14.2–22.2) | 11.4<br>(4.9–21.4)         | 11.5<br>(4.9–21.6) | 2.1<br>(0.9–4.7)  | 1.1<br>(0.5–2.6)  | 10.1<br>(6.2–14.3)          | 12.0<br>(7.4–16.9) | 5.5<br>(3.0–8.2)   | 5.5<br>(3.1–8.2)   | 1.2<br>(<0.1–3.9) | 1.2<br>(<0.1–3.9) | 0.4<br>(<0.1–2.0)  | 0.4<br>(<0.1–2.0)  |
| Belize              | 41.5<br>(22.0–55.2) | 37.1<br>(19.5–52.1) | 6.3<br>(0.3–19.4)  | 6.1<br>(0.2–18.2)  | 3.8<br>(1.6–7.8)        | 3.9<br>(1.6–7.7)    | 20.4<br>(16.2–24.8) | 23.3<br>(17.7–29.0) | 9.5<br>(4.0–15.0)  | 9.5<br>(4.0–15.0)  | 14.4<br>(11.3–17.5) | 17.2<br>(12.7–21.8) | 10.6<br>(3.8–20.6)         | 10.6<br>(4.0–20.5) | 3.0<br>(1.6–6.2)  | 3.0<br>(1.6–6.2)  | 11.3<br>(6.9–16.2)          | 10.2<br>(6.2–14.9) | 7.0<br>(3.8–10.5)  | 7.1<br>(3.9–10.7)  | 1.7<br>(<0.1–4.2) | 1.7<br>(<0.1–4.2) | 0.1<br>(<0.1–1.3)  | 0.1<br>(<0.1–1.3)  |
| Cuba                | 34.2<br>(16.1–48.7) | 38.6<br>(19.2–53.5) | 2.4<br>(0.0–8.9)   | 5.2<br>(0.2–16.3)  | 0.4<br>(0.1–1.0)        | 0.4<br>(0.1–0.9)    | 18.6<br>(14.8–22.8) | 15.7<br>(12.5–19.6) | 6.0<br>(2.5–9.6)   | 6.0<br>(2.5–9.6)   | 14.7<br>(11.5–18.1) | 12.7<br>(10.0–15.8) | 9.6<br>(4.6–16.9)          | 9.5<br>(4.6–17.0)  | 1.3<br>(0.6–2.9)  | 1.8<br>(0.8–3.9)  | 10.2<br>(7.1–13.4)          | 10.0<br>(7.1–13.2) | 10.5<br>(6.1–15.3) | 10.1<br>(6.2–14.8) | 1.5<br>(<0.1–4.0) | 1.5<br>(<0.1–4.0) | 0.2<br>(<0.1–1.6)  | 0.2<br>(<0.1–1.6)  |
| Dominica            | 44.7<br>(24.8–60.6) | 46.7<br>(26.1–62.2) | 4.1<br>(<0.1–14.7) | 4.9<br>(<0.1–17.2) | 1.4<br>(0.4–3.3)        | 1.4<br>(0.4–3.3)    | 19.6<br>(12.8–27.2) | 16.1<br>(10.7–23.3) | 8.3<br>(3.5–13.2)  | 8.3<br>(3.5–13.2)  | 13.2<br>(8.6–18.9)  | 11.6<br>(7.7–16.7)  | 9.6<br>(4.0–18.9)          | 9.6<br>(4.0–18.9)  | 2.7<br>(1.2–5.8)  | 3.2<br>(1.6–7.1)  | 9.5<br>(5.6–14.3)           | 9.9<br>(5.9–14.7)  | 5.5<br>(2.8–8.5)   | 5.7<br>(3.0–8.9)   | 1.1<br>(<0.1–3.5) | 1.1<br>(<0.1–3.5) | 0.3<br>(<0.1–3.2)  | 0.3<br>(<0.1–3.2)  |
| Dominican Republic  | 39.6<br>(19.3–56.3) | 41.3<br>(21.3–58.0) | 4.3<br>(<0.1–14.6) | 5.2<br>(0.1–17.6)  | 2.5<br>(0.9–5.6)        | 2.5<br>(0.9–5.6)    | 21.7<br>(12.7–33.9) | 18.8<br>(10.5–30.4) | 16.0<br>(7.1–24.3) | 16.0<br>(7.1–24.3) | 15.6<br>(9.3–24.8)  | 13.5<br>(7.4–22.2)  | 8.9<br>(3.9–17.7)          | 9.0<br>(3.8–17.7)  | 2.2<br>(1.0–4.7)  | 3.0<br>(1.4–6.4)  | 10.6<br>(5.9–16.2)          | 12.8<br>(7.0–19.1) | 5.6<br>(3.2–8.3)   | 5.7<br>(3.2–8.5)   | 0.6<br>(<0.1–2.2) | 0.6<br>(<0.1–2.2) | <0.1<br>(<0.1–1.7) | <0.1<br>(<0.1–1.7) |
| Grenada             | 46.2<br>(26.2–60.1) | 46.8<br>(26.1–61.3) | 4.2<br>(<0.1–14.6) | 5.2<br>(0.1–16.8)  | 0.6<br>(0.2–1.3)        | 0.6<br>(0.2–1.3)    | 19.6<br>(15.6–24.2) | 16.8<br>(12.8–21.2) | 7.6<br>(3.2–12.2)  | 7.6<br>(3.2–12.2)  | 13.7<br>(10.6–17.0) | 12.1<br>(9.3–15.3)  | 11.2<br>(4.2–21.4)         | 11.1<br>(4.4–21.4) | 2.9<br>(1.4–6.4)  | 3.5<br>(1.7–7.6)  | 9.7<br>(5.7–14.2)           | 9.7<br>(5.8–14.2)  | 5.4<br>(2.6–8.8)   | 5.5<br>(2.8–8.9)   | 1.4<br>(<0.1–4.2) | 1.4<br>(<0.1–4.2) | 0.3<br>(<0.1–1.8)  | 0.3<br>(<0.1–1.8)  |
| Guyana              | 48.5<br>(31.8–60.9) | 58.7<br>(40.2–71.0) | 4.6<br>(0.1–14.9)  | 8.1<br>(0.4–24.3)  | 1.5<br>(0.6–3.1)        | 1.5<br>(0.6–3.2)    | 27.0<br>(19.9–34.9) | 17.7<br>(12.5–24.1) | 14.1<br>(6.1–21.9) | 14.1<br>(6.1–21.9) | 19.2<br>(14.0–25.1) | 13.8<br>(9.6–19.1)  | 10.2<br>(4.3–20.4)         | 10.3<br>(3.9–20.4) | 4.5<br>(2.7–9.5)  | 6.6<br>(4.0–13.2) | 9.4<br>(5.6–14.0)           | 8.7<br>(5.1–13.2)  | 7.4<br>(3.9–11.4)  | 7.4<br>(3.9–11.3)  | 0.9<br>(<0.1–2.8) | 0.9<br>(<0.1–2.8) | <0.1<br>(<0.1–1.3) | <0.1<br>(<0.1–1.3) |
| Haiti               | 50.2<br>(30.2–65.9) | 45.9<br>(27.9–61.4) | 8.6<br>(0.4–24.6)  | 8.5<br>(0.4–23.3)  | 38.5<br>(23.7–52.8)     | 38.5<br>(23.8–52.6) | 22.1<br>(13.7–31.7) | 25.3<br>(16.2–35.9) | 19.5<br>(8.7–29.2) | 19.5<br>(8.7–29.2) | 15.2<br>(9.2–21.9)  | 17.8<br>(11.5–25.3) | 5.3<br>(2.3–10.4)          | 5.3<br>(2.3–10.4)  | 7.0<br>(4.1–14.0) | 6.3<br>(3.7–12.6) | 8.6<br>(5.1–12.4)           | 8.7<br>(5.2–12.7)  | 3.2<br>(1.4–5.3)   | 3.2<br>(1.5–5.2)   | 0.8<br>(<0.1–3.0) | 0.8<br>(<0.1–3.0) | <0.1<br>(<0.1–1.3) | <0.1<br>(<0.1–1.3) |

|                                  | Child wasting       |                     | Child stunting     |                    | Household air pollution |                     | Low birth weight    |                     | Handwashing        |                    | Short gestation     |                     | Ambient particulate matter |                    | Child underweight |                   | Non-exclusive breastfeeding |                    | Secondhand smoke   |                    | High temperature  |                   | Low temperature    |                    |
|----------------------------------|---------------------|---------------------|--------------------|--------------------|-------------------------|---------------------|---------------------|---------------------|--------------------|--------------------|---------------------|---------------------|----------------------------|--------------------|-------------------|-------------------|-----------------------------|--------------------|--------------------|--------------------|-------------------|-------------------|--------------------|--------------------|
|                                  | M                   | F                   | M                  | F                  | M                       | F                   | M                   | F                   | M                  | F                  | M                   | F                   | M                          | F                  | M                 | F                 | M                           | F                  | M                  | F                  | M                 | F                 | M                  | F                  |
| Jamaica                          | 28.2<br>(14.8–40.3) | 28.7<br>(14.9–41.5) | 2.6<br>(<0.1–8.8)  | 2.4<br>(0.0–8.8)   | 2.0<br>(0.7–4.5)        | 1.9<br>(0.6–4.4)    | 39.8<br>(32.0–47.8) | 37.1<br>(29.2–44.9) | 11.2<br>(4.8–17.4) | 11.2<br>(4.8–17.4) | 27.1<br>(21.4–32.7) | 26.0<br>(20.3–31.7) | 8.2<br>(4.6–13.2)          | 8.0<br>(4.7–13.0)  | 1.6<br>(0.8–3.7)  | 1.4<br>(0.6–3.4)  | 9.0<br>(5.3–13.3)           | 9.6<br>(5.7–14.0)  | 9.0<br>(5.2–13.0)  | 9.0<br>(5.2–13.0)  | 1.2<br>(<0.1–4.3) | 1.2<br>(<0.1–4.3) | 0.1<br>(<0.1–1.1)  | 0.1<br>(<0.1–1.1)  |
| Saint Kitts and Nevis            | 34.1<br>(17.4–48.1) | 39.6<br>(21.2–53.8) | 3.0<br>(0.0–10.4)  | 3.9<br>(0.0–14.0)  | 0.4<br>(0.1–1.2)        | 0.4<br>(0.1–1.1)    | 31.4<br>(24.2–44.1) | 24.2<br>(18.2–33.9) | 7.6<br>(3.2–12.1)  | 7.6<br>(3.2–12.1)  | 22.7<br>(17.1–32.0) | 18.2<br>(13.6–25.7) | 4.5<br>(1.8–8.3)           | 4.4<br>(1.8–8.0)   | 1.9<br>(0.8–4.4)  | 2.6<br>(1.1–5.9)  | 9.6<br>(5.9–14.2)           | 10.4<br>(6.4–15.4) | 7.1<br>(3.7–11.0)  | 7.1<br>(3.9–10.7)  | 1.0<br>(<0.1–3.9) | 1.0<br>(<0.1–3.9) | 0.4<br>(<0.1–2.3)  | 0.4<br>(<0.1–2.3)  |
| Saint Lucia                      | 39.2<br>(22.1–52.2) | 31.5<br>(15.9–44.3) | 1.4<br>(0.0–5.5)   | 2.6<br>(0.0–9.5)   | 0.7<br>(0.2–1.6)        | 0.7<br>(0.2–1.6)    | 26.0<br>(20.5–31.8) | 26.6<br>(22.0–31.8) | 5.7<br>(2.3–9.2)   | 5.7<br>(2.3–9.2)   | 18.2<br>(14.1–22.7) | 19.0<br>(15.6–23.0) | 11.2<br>(4.8–21.0)         | 11.2<br>(4.6–21.0) | 1.3<br>(0.5–3.0)  | 1.2<br>(0.5–2.8)  | 9.6<br>(5.5–14.1)           | 9.9<br>(5.7–14.3)  | 5.8<br>(3.0–8.8)   | 5.9<br>(3.2–8.9)   | 1.7<br>(<0.1–4.8) | 1.7<br>(<0.1–4.8) | 0.3<br>(<0.1–1.9)  | 0.3<br>(<0.1–1.9)  |
| Saint Vincent and the Grenadines | 42.0<br>(23.4–55.1) | 45.1<br>(25.2–58.6) | 3.9<br>(0.0–13.4)  | 4.8<br>(0.1–16.9)  | 0.9<br>(0.3–1.9)        | 0.9<br>(0.3–1.9)    | 22.5<br>(18.2–27.2) | 19.1<br>(15.1–23.5) | 9.1<br>(3.8–14.3)  | 9.1<br>(3.8–14.3)  | 15.6<br>(12.3–19.0) | 13.5<br>(10.6–16.7) | 11.0<br>(4.3–21.1)         | 11.0<br>(4.2–21.1) | 2.6<br>(1.3–5.9)  | 3.1<br>(1.6–7.0)  | 9.5<br>(5.7–14.0)           | 11.9<br>(7.3–17.3) | 6.4<br>(3.4–10.1)  | 6.4<br>(3.4–10.0)  | 1.3<br>(<0.1–4.0) | 1.3<br>(<0.1–4.0) | 0.4<br>(<0.1–2.0)  | 0.4<br>(<0.1–2.0)  |
| Suriname                         | 48.6<br>(29.3–62.8) | 48.5<br>(28.5–63.2) | 3.6<br>(0.0–12.8)  | 4.8<br>(0.1–15.8)  | 2.2<br>(0.8–4.7)        | 2.2<br>(0.8–4.7)    | 21.3<br>(14.2–30.0) | 20.9<br>(13.9–29.8) | 9.3<br>(3.9–14.9)  | 9.3<br>(3.9–14.9)  | 14.8<br>(9.5–21.2)  | 15.1<br>(9.8–21.4)  | 10.8<br>(4.5–20.5)         | 10.8<br>(4.7–20.4) | 4.0<br>(2.1–8.4)  | 5.2<br>(2.9–10.5) | 12.5<br>(7.2–19.0)          | 13.9<br>(8.3–20.6) | 11.7<br>(6.6–17.0) | 11.8<br>(6.7–17.1) | 1.0<br>(<0.1–3.0) | 1.0<br>(<0.1–3.0) | 0.3<br>(<0.1–1.6)  | 0.3<br>(<0.1–1.6)  |
| Trinidad and Tobago              | 41.5<br>(23.0–53.8) | 41.5<br>(22.2–55.2) | 1.5<br>(0.0–5.6)   | 2.9<br>(0.1–10.1)  | <0.1<br>(<0.1–<0.1)     | <0.1<br>(<0.1–<0.1) | 28.4<br>(22.7–34.6) | 26.4<br>(20.5–33.1) | 6.8<br>(2.8–10.9)  | 6.8<br>(2.8–10.9)  | 17.2<br>(13.7–21.3) | 16.3<br>(12.6–20.4) | 11.4<br>(4.2–22.8)         | 11.3<br>(4.2–22.8) | 2.2<br>(1.1–4.9)  | 2.6<br>(1.4–5.4)  | 12.1<br>(7.0–17.8)          | 12.1<br>(6.9–18.0) | 8.8<br>(4.6–13.3)  | 8.9<br>(4.7–13.8)  | 0.4<br>(<0.1–2.6) | 0.4<br>(<0.1–2.6) | 0.2<br>(<0.1–1.2)  | 0.2<br>(<0.1–1.2)  |
| Central Latin America            | 44.3<br>(23.4–58.7) | 46.7<br>(24.8–61.9) | 9.3<br>(0.5–26.1)  | 10.5<br>(0.6–29.2) | 8.9<br>(4.5–15.1)       | 8.8<br>(4.5–15.0)   | 15.2<br>(13.4–17.3) | 11.5<br>(10.0–13.1) | 6.3<br>(2.6–10.1)  | 6.3<br>(2.6–10.1)  | 10.2<br>(8.9–11.6)  | 7.9<br>(6.9–9.1)    | 10.6<br>(7.2–15.3)         | 10.6<br>(7.2–15.3) | 4.4<br>(2.4–9.3)  | 4.8<br>(2.7–10.2) | 9.5<br>(5.9–13.7)           | 9.0<br>(5.6–12.9)  | 4.0<br>(1.6–7.1)   | 4.1<br>(1.6–7.2)   | 1.3<br>(<0.1–3.2) | 1.3<br>(<0.1–3.1) | 3.3<br>(1.5–5.2)   | 3.4<br>(1.5–5.3)   |
| Colombia                         | 39.2<br>(19.1–55.3) | 43.8<br>(20.6–61.3) | 4.5<br>(0.0–15.4)  | 7.2<br>(0.1–22.8)  | 2.3<br>(0.8–5.0)        | 2.3<br>(0.8–5.0)    | 16.1<br>(11.0–21.5) | 9.9<br>(6.4–13.8)   | 6.1<br>(2.5–9.9)   | 6.1<br>(2.5–9.9)   | 10.7<br>(7.2–14.4)  | 7.1<br>(4.6–10.0)   | 11.3<br>(6.9–17.4)         | 11.2<br>(6.8–17.4) | 2.4<br>(1.1–5.4)  | 3.9<br>(2.0–8.5)  | 9.2<br>(5.3–13.9)           | 8.9<br>(5.0–13.4)  | 5.0<br>(2.4–8.3)   | 5.2<br>(2.4–8.4)   | 1.0<br>(<0.1–3.4) | 1.0<br>(<0.1–3.4) | 3.4<br>(1.8–5.1)   | 3.4<br>(1.8–5.1)   |
| Costa Rica                       | 37.9<br>(17.8–53.8) | 43.5<br>(22.5–59.3) | 3.6<br>(0.0–12.4)  | 4.4<br>(0.0–15.2)  | 1.1<br>(0.4–2.6)        | 1.1<br>(0.4–2.6)    | 14.1<br>(10.9–18.2) | 11.8<br>(8.9–15.5)  | 6.8<br>(2.8–10.9)  | 6.8<br>(2.8–10.9)  | 9.8<br>(7.5–12.7)   | 9.2<br>(6.9–12.1)   | 9.1<br>(5.5–13.7)          | 9.2<br>(5.8–13.7)  | 1.9<br>(0.8–4.6)  | 2.3<br>(1.0–5.3)  | 8.3<br>(5.1–11.9)           | 8.5<br>(5.2–12.1)  | 8.1<br>(4.5–12.1)  | 8.2<br>(4.5–12.1)  | 0.3<br>(<0.1–2.2) | 0.3<br>(<0.1–2.2) | 0.6<br>(<0.1–2.7)  | 0.6<br>(<0.1–2.7)  |
| El Salvador                      | 40.0<br>(18.5–57.2) | 48.1<br>(24.8–65.4) | 5.8<br>(0.0–19.2)  | 7.7<br>(0.2–24.1)  | 3.9<br>(1.6–7.5)        | 3.9<br>(1.6–7.5)    | 13.6<br>(8.7–20.5)  | 8.6<br>(4.9–13.8)   | 9.0<br>(3.8–14.4)  | 9.0<br>(3.8–14.4)  | 9.0<br>(5.7–13.9)   | 6.2<br>(3.4–10.0)   | 11.1<br>(6.1–17.8)         | 11.1<br>(6.1–17.8) | 2.6<br>(1.2–5.7)  | 5.6<br>(3.3–11.2) | 8.2<br>(4.6–12.2)           | 8.9<br>(5.1–13.4)  | 3.5<br>(1.7–5.6)   | 3.4<br>(1.7–5.4)   | 1.4<br>(<0.1–6.7) | 1.4<br>(<0.1–6.7) | <0.1<br>(<0.1–0.6) | <0.1<br>(<0.1–0.6) |
| Guatemala                        | 47.0<br>(23.3–63.0) | 48.6<br>(24.9–65.7) | 16.5<br>(1.6–41.2) | 18.1<br>(1.6–44.5) | 17.2<br>(8.6–29.6)      | 17.2<br>(8.5–29.6)  | 10.6<br>(9.0–12.4)  | 7.4<br>(6.1–8.8)    | 7.6<br>(3.2–12.1)  | 7.6<br>(3.2–12.1)  | 7.0<br>(5.8–8.2)    | 5.0<br>(4.1–5.9)    | 11.2<br>(6.9–16.9)         | 11.2<br>(7.0–16.9) | 7.1<br>(4.2–14.4) | 7.4<br>(4.3–15.1) | 7.1<br>(3.8–10.8)           | 6.7<br>(3.6–10.2)  | 3.2<br>(1.2–5.8)   | 3.2<br>(1.2–5.6)   | 1.7<br>(0.5–3.5)  | 1.7<br>(0.5–3.5)  | 1.5<br>(<0.1–3.2)  | 1.5<br>(<0.1–3.2)  |
| Honduras                         | 30.7<br>(13.5–47.2) | 28.6<br>(12.5–46.0) | 6.8<br>(0.1–20.1)  | 6.9<br>(0.2–20.3)  | 21.4<br>(11.9–33.7)     | 21.5<br>(12.1–33.7) | 28.2<br>(17.2–41.2) | 29.9<br>(18.0–41.9) | 5.4<br>(2.2–8.6)   | 5.4<br>(2.2–8.6)   | 18.6<br>(11.3–27.4) | 20.9<br>(12.6–30.0) | 8.5<br>(5.2–13.0)          | 8.5<br>(5.3–12.7)  | 3.8<br>(1.8–8.1)  | 3.9<br>(1.8–8.1)  | 9.5<br>(4.7–15.0)           | 8.9<br>(4.5–14.2)  | 6.8<br>(3.6–10.4)  | 7.0<br>(3.7–10.6)  | 0.7<br>(<0.1–2.6) | 0.7<br>(<0.1–2.6) | <0.1<br>(<0.1–2.4) | <0.1<br>(<0.1–2.4) |
| Mexico                           | 45.6<br>(25.3–60.1) | 48.5<br>(26.9–63.8) | 6.2<br>(0.1–19.5)  | 7.1<br>(0.1–22.0)  | 4.4<br>(2.0–7.9)        | 4.8<br>(2.1–8.6)    | 16.6<br>(11.8–21.9) | 12.9<br>(8.8–17.3)  | 5.2<br>(2.1–8.3)   | 5.2<br>(2.1–8.4)   | 11.2<br>(7.9–14.8)  | 8.8<br>(6.0–11.8)   | 10.2<br>(6.9–15.0)         | 10.1<br>(6.6–15.0) | 3.4<br>(1.8–7.5)  | 3.7<br>(1.8–8.2)  | 11.2<br>(7.4–15.4)          | 10.5<br>(6.9–14.5) | 3.3<br>(0.9–6.7)   | 3.4<br>(0.9–6.8)   | 1.1<br>(<0.1–2.2) | 1.1<br>(<0.1–2.1) | 6.9<br>(4.3–9.7)   | 6.7<br>(4.2–9.5)   |

|                                     | Child wasting               |                             | Child stunting             |                            | Household air pollution     |                             | Low birth weight            |                             | Handwashing                |                            | Short gestation             |                            | Ambient particulate matter  |                             | Child underweight         |                           | Non-exclusive breastfeeding |                           | Secondhand smoke           |                            | High temperature         |                          | Low temperature           |                           |
|-------------------------------------|-----------------------------|-----------------------------|----------------------------|----------------------------|-----------------------------|-----------------------------|-----------------------------|-----------------------------|----------------------------|----------------------------|-----------------------------|----------------------------|-----------------------------|-----------------------------|---------------------------|---------------------------|-----------------------------|---------------------------|----------------------------|----------------------------|--------------------------|--------------------------|---------------------------|---------------------------|
|                                     | M                           | F                           | M                          | F                          | M                           | F                           | M                           | F                           | M                          | F                          | M                           | F                          | M                           | F                           | M                         | F                         | M                           | F                         | M                          | F                          | M                        | F                        | M                         | F                         |
| Nicaragua                           | 41.2<br>(18.9–58.1)         | 39.2<br>(18.8–55.1)         | 6.5<br>(0.1–21.2)          | 7.0<br>(0.1–22.2)          | 16.7<br>(8.1–28.3)          | 16.8<br>(8.3–28.3)          | 14.4<br>(9.4–20.4)          | 12.9<br>(9.3–16.9)          | 8.1<br>(3.4–12.8)          | 8.1<br>(3.4–12.8)          | 9.8<br>(6.4–14.2)           | 9.3<br>(6.7–12.3)          | 8.6<br>(4.9–13.7)           | 8.6<br>(4.9–13.5)           | 3.0<br>(1.4–6.7)          | 2.9<br>(1.3–6.6)          | 9.5<br>(5.7–13.7)           | 8.3<br>(4.8–12.4)         | 5.5<br>(2.5–9.2)           | 5.5<br>(2.5–9.0)           | 0.8<br>(<0.1–4.9)        | 0.8<br>(<0.1–4.9)        | <0.1<br>(<0.1–1.1)        | <0.1<br>(<0.1–1.1)        |
| Panama                              | 43.9<br>(20.9–60.7)         | 45.7<br>(21.8–63.5)         | 7.7<br>(0.1–25.2)          | 7.7<br>(0.2–24.6)          | 1.8<br>(0.5–3.8)            | 1.7<br>(0.5–3.8)            | 9.5<br>(7.5–11.8)           | 6.6<br>(5.2–8.3)            | 6.1<br>(2.5–9.8)           | 6.1<br>(2.5–9.8)           | 6.4<br>(5.0–8.0)            | 4.8<br>(3.7–6.2)           | 6.7<br>(3.5–10.9)           | 6.6<br>(3.4–10.9)           | 3.3<br>(1.6–7.4)          | 3.2<br>(1.5–7.2)          | 10.8<br>(7.5–14.6)          | 10.4<br>(7.0–14.0)        | 4.2<br>(2.4–6.3)           | 4.3<br>(2.3–6.6)           | 0.6<br>(<0.1–2.3)        | 0.6<br>(<0.1–2.3)        | <0.1<br>(<0.1–1.0)        | <0.1<br>(<0.1–1.0)        |
| Venezuela (Bolivarian Republic of)  | 43.8<br>(25.1–56.5)         | 46.2<br>(26.7–59.5)         | 6.1<br>(0.2–18.4)          | 6.7<br>(0.3–19.5)          | 0.1<br>(<0.1–0.2)           | 0.1<br>(<0.1–0.2)           | 22.6<br>(18.5–27.3)         | 18.5<br>(14.7–22.8)         | 5.7<br>(2.4–9.2)           | 5.7<br>(2.4–9.2)           | 15.3<br>(12.3–18.6)         | 13.1<br>(10.4–16.5)        | 11.6<br>(6.8–18.6)          | 11.5<br>(6.5–18.6)          | 2.7<br>(1.3–5.6)          | 3.0<br>(1.5–6.3)          | 11.6<br>(7.5–16.2)          | 11.2<br>(7.1–15.7)        | 6.3<br>(2.8–10.3)          | 6.5<br>(3.0–10.7)          | 1.2<br>(<0.1–9.4)        | 1.2<br>(<0.1–9.4)        | 0.1<br>(<0.1–1.7)         | 0.1<br>(<0.1–1.7)         |
| Tropical Latin America              | 55.6<br>(31.4–70.7)         | 55.5<br>(31.3–71.3)         | 5.8<br>(0.1–19.6)          | 6.1<br>(<0.1–20.4)         | 3.2<br>(1.2–6.6)            | 3.4<br>(1.2–7.0)            | 6.7<br>(6.1–7.5)            | 5.3<br>(4.8–5.8)            | 6.7<br>(2.8–10.7)          | 7.0<br>(2.8–11.1)          | 5.5<br>(4.9–6.1)            | 4.6<br>(4.2–5.1)           | 5.5<br>(3.4–8.7)            | 5.4<br>(3.3–8.6)            | 3.7<br>(1.9–7.8)          | 4.1<br>(2.2–8.6)          | 11.9<br>(8.3–15.9)          | 10.8<br>(7.4–14.5)        | 10.4<br>(6.2–15.4)         | 10.7<br>(6.1–15.4)         | 2.0<br>(<0.1–10.3)       | 2.1<br>(<0.1–11.2)       | 0.7<br>(<0.1–2.1)         | 0.6<br>(<0.1–1.9)         |
| Brazil                              | 55.8<br>(31.7–70.9)         | 56.0<br>(31.9–71.6)         | 5.9<br>(0.1–19.6)          | 6.1<br>(<0.1–20.5)         | 3.0<br>(1.1–6.3)            | 3.2<br>(1.1–6.7)            | 6.8<br>(6.1–7.5)            | 5.4<br>(4.8–5.9)            | 6.7<br>(2.8–10.7)          | 6.9<br>(2.8–11.1)          | 5.5<br>(5.0–6.2)            | 4.7<br>(4.2–5.2)           | 5.5<br>(3.3–8.6)            | 5.4<br>(3.2–8.5)            | 3.7<br>(1.9–7.8)          | 4.2<br>(2.3–8.8)          | 11.9<br>(8.3–15.9)          | 10.8<br>(7.4–14.3)        | 10.5<br>(6.2–15.5)         | 10.8<br>(6.2–15.5)         | 1.9<br>(<0.1–10.4)       | 2.0<br>(<0.1–11.5)       | 0.7<br>(<0.1–2.1)         | 0.6<br>(<0.1–1.9)         |
| Paraguay                            | 46.3<br>(22.3–65.3)         | 41.5<br>(17.3–60.7)         | 5.5<br>(0.1–19.1)          | 5.3<br>(0.0–18.3)          | 8.0<br>(3.0–15.8)           | 7.9<br>(3.0–15.8)           | 4.7<br>(2.8–7.5)            | 2.8<br>(1.5–4.5)            | 7.9<br>(3.3–12.7)          | 7.9<br>(3.3–12.7)          | 3.8<br>(2.2–6.0)            | 2.4<br>(1.3–3.9)           | 6.2<br>(3.6–10.4)           | 6.2<br>(3.6–10.4)           | 2.4<br>(1.0–5.5)          | 1.9<br>(0.8–4.7)          | 11.6<br>(6.8–17.0)          | 12.2<br>(7.2–18.0)        | 8.4<br>(4.5–13.0)          | 8.6<br>(4.8–12.7)          | 5.2<br>(2.9–7.6)         | 5.2<br>(2.9–7.6)         | 0.9<br>(<0.1–5.0)         | 0.9<br>(<0.1–5.0)         |
| <b>North Africa and Middle East</b> | <b>55.2<br/>(36.8–66.3)</b> | <b>58.6<br/>(39.2–70.1)</b> | <b>11.8<br/>(1.0–30.0)</b> | <b>13.2<br/>(1.0–33.0)</b> | <b>18.4<br/>(10.6–26.5)</b> | <b>19.7<br/>(11.6–28.4)</b> | <b>20.0<br/>(15.7–24.6)</b> | <b>16.5<br/>(12.4–20.8)</b> | <b>11.4<br/>(4.9–18.1)</b> | <b>11.7<br/>(4.9–18.5)</b> | <b>14.8<br/>(11.5–18.4)</b> | <b>12.7<br/>(9.6–16.2)</b> | <b>17.2<br/>(11.6–24.2)</b> | <b>16.7<br/>(11.3–23.6)</b> | <b>8.9<br/>(5.4–16.4)</b> | <b>9.9<br/>(6.3–19.2)</b> | <b>7.8<br/>(4.0–12.1)</b>   | <b>8.0<br/>(4.2–12.7)</b> | <b>13.0<br/>(8.3–18.2)</b> | <b>12.9<br/>(8.1–17.6)</b> | <b>5.2<br/>(3.3–7.3)</b> | <b>5.1<br/>(3.2–7.2)</b> | <b>8.1<br/>(4.0–12.2)</b> | <b>8.3<br/>(4.2–12.6)</b> |
| Afghanistan                         | 54.3<br>(34.6–67.7)         | 58.7<br>(37.9–72.7)         | 15.4<br>(1.7–36.9)         | 15.9<br>(1.4–38.2)         | 36.3<br>(23.1–48.0)         | 36.2<br>(23.0–48.0)         | 21.2<br>(13.3–29.9)         | 15.9<br>(9.4–23.7)          | 15.7<br>(6.8–23.8)         | 15.7<br>(6.8–23.8)         | 15.4<br>(9.6–22.0)          | 11.8<br>(7.0–17.5)         | 10.6<br>(4.7–18.8)          | 10.6<br>(4.7–19.0)          | 11.5<br>(7.3–20.8)        | 12.1<br>(7.7–22.4)        | 6.9<br>(3.4–11.7)           | 7.2<br>(3.4–11.8)         | 10.5<br>(6.2–15.1)         | 10.3<br>(6.1–14.9)         | 3.1<br>(1.9–4.2)         | 3.1<br>(1.9–4.2)         | 13.7<br>(9.0–19.6)        | 13.7<br>(9.0–19.6)        |
| Algeria                             | 57.2<br>(37.1–72.3)         | 58.3<br>(39.1–72.7)         | 5.7<br>(0.1–18.5)          | 6.6<br>(0.2–20.9)          | 0.1<br>(<0.1–0.1)           | 0.1<br>(<0.1–0.1)           | 12.7<br>(6.9–21.2)          | 11.7<br>(6.5–18.8)          | 4.9<br>(2.0–7.9)           | 4.9<br>(2.0–7.9)           | 10.7<br>(5.6–17.6)          | 11.1<br>(6.2–17.9)         | 17.0<br>(10.2–25.7)         | 17.0<br>(10.0–25.7)         | 3.6<br>(1.9–7.6)          | 4.5<br>(2.4–9.2)          | 10.4<br>(6.5–15.0)          | 9.9<br>(6.1–14.3)         | 16.0<br>(10.2–21.9)        | 16.2<br>(10.3–22.4)        | 9.2<br>(6.2–12.2)        | 9.2<br>(6.2–12.2)        | 4.3<br>(<0.1–10.1)        | 4.3<br>(<0.1–10.1)        |
| Bahrain                             | 63.5<br>(37.8–79.0)         | 61.7<br>(37.3–77.0)         | 4.5<br>(0.0–16.0)          | 4.3<br>(0.0–15.7)          | 0.1<br>(<0.1–0.2)           | 0.1<br>(<0.1–0.2)           | 3.9<br>(2.4–6.4)            | 6.3<br>(3.6–10.2)           | 4.6<br>(1.9–7.4)           | 4.6<br>(1.9–7.4)           | 3.2<br>(1.9–5.2)            | 5.4<br>(3.1–8.8)           | 26.5<br>(18.0–36.4)         | 26.6<br>(18.0–36.4)         | 4.0<br>(1.9–8.9)          | 3.9<br>(1.9–8.6)          | 6.9<br>(3.8–11.0)           | 7.3<br>(3.9–11.1)         | 12.5<br>(7.7–17.9)         | 13.3<br>(8.3–18.8)         | 11.6<br>(5.8–16.6)       | 11.6<br>(5.8–16.6)       | 2.0<br>(<0.1–10.1)        | 2.0<br>(<0.1–10.1)        |
| Egypt                               | 50.6<br>(31.8–65.3)         | 51.6<br>(31.4–66.8)         | 7.5<br>(0.4–23.3)          | 9.4<br>(0.4–26.8)          | <0.1<br>(<0.1–0.1)          | <0.1<br>(<0.1–0.1)          | 22.9<br>(13.7–35.3)         | 22.3<br>(13.0–33.6)         | 3.8<br>(1.5–6.3)           | 3.8<br>(1.5–6.3)           | 17.5<br>(10.5–27.3)         | 18.1<br>(10.5–27.5)        | 29.0<br>(19.6–40.0)         | 29.0<br>(19.8–40.0)         | 2.7<br>(1.4–6.0)          | 3.7<br>(1.9–8.0)          | 8.5<br>(3.9–13.7)           | 8.7<br>(4.1–14.2)         | 16.2<br>(10.4–22.3)        | 16.3<br>(10.3–22.1)        | 7.7<br>(4.8–10.9)        | 7.7<br>(4.8–10.9)        | 2.7<br>(<0.1–9.1)         | 2.7<br>(<0.1–9.1)         |
| Iran (Islamic Republic of)          | 51.7<br>(32.6–62.9)         | 52.2<br>(32.9–64.0)         | 5.0<br>(0.1–16.8)          | 5.1<br>(0.1–16.4)          | 0.1<br>(<0.1–0.2)           | 0.1<br>(<0.1–0.2)           | 18.2<br>(15.5–21.5)         | 17.9<br>(14.7–21.4)         | 4.4<br>(1.8–7.2)           | 4.4<br>(1.8–7.2)           | 13.3<br>(11.1–15.7)         | 14.1<br>(11.5–16.8)        | 19.9<br>(13.5–27.7)         | 19.8<br>(13.6–27.5)         | 3.3<br>(1.7–7.0)          | 3.5<br>(1.8–7.7)          | 7.6<br>(4.4–11.2)           | 7.7<br>(4.4–11.2)         | 13.1<br>(8.1–18.5)         | 13.4<br>(8.3–18.5)         | 4.3<br>(2.9–5.6)         | 4.2<br>(2.9–5.6)         | 11.4<br>(8.0–14.6)        | 11.4<br>(7.8–14.6)        |
| Iraq                                | 48.0<br>(30.3–62.1)         | 52.3<br>(33.7–65.4)         | 7.6<br>(0.2–22.4)          | 8.1<br>(0.3–23.6)          | 0.1<br>(<0.1–0.1)           | 0.1<br>(<0.1–0.1)           | 25.7<br>(17.7–35.5)         | 20.2<br>(13.5–28.1)         | 2.7<br>(1.1–4.5)           | 2.7<br>(1.1–4.5)           | 19.6<br>(13.3–27.1)         | 16.6<br>(11.0–23.2)        | 22.9<br>(15.2–32.4)         | 22.9<br>(15.2–32.4)         | 4.6<br>(2.6–9.2)          | 4.7<br>(2.6–9.6)          | 7.9<br>(4.1–12.8)           | 8.2<br>(4.4–13.6)         | 15.9<br>(10.1–21.9)        | 15.7<br>(10.1–21.5)        | 10.8<br>(7.5–13.8)       | 10.8<br>(7.5–13.8)       | 4.7<br>(<0.1–10.6)        | 4.7<br>(<0.1–10.6)        |

|                      | Child wasting       |                     | Child stunting     |                    | Household air pollution |                     | Low birth weight    |                     | Handwashing        |                    | Short gestation     |                     | Ambient particulate matter |                     | Child underweight  |                    | Non-exclusive breastfeeding |                    | Secondhand smoke    |                     | High temperature   |                    | Low temperature     |                     |
|----------------------|---------------------|---------------------|--------------------|--------------------|-------------------------|---------------------|---------------------|---------------------|--------------------|--------------------|---------------------|---------------------|----------------------------|---------------------|--------------------|--------------------|-----------------------------|--------------------|---------------------|---------------------|--------------------|--------------------|---------------------|---------------------|
|                      | M                   | F                   | M                  | F                  | M                       | F                   | M                   | F                   | M                  | F                  | M                   | F                   | M                          | F                   | M                  | F                  | M                           | F                  | M                   | F                   | M                  | F                  | M                   | F                   |
| Jordan               | 46.0<br>(26.2–60.0) | 51.2<br>(28.8–65.8) | 3.9<br>(0.1–13.5)  | 5.1<br>(0.1–16.7)  | <0.1<br>(<0.1–<0.1)     | <0.1<br>(<0.1–<0.1) | 21.6<br>(16.0–28.1) | 14.2<br>(10.1–19.2) | 4.2<br>(1.7–6.9)   | 4.2<br>(1.7–6.9)   | 16.3<br>(12.1–21.3) | 11.6<br>(8.4–15.7)  | 15.9<br>(10.4–23.4)        | 15.9<br>(10.4–23.4) | 1.9<br>(0.8–4.2)   | 3.2<br>(1.8–6.7)   | 11.3<br>(7.0–15.9)          | 10.8<br>(6.8–15.3) | 16.0<br>(10.0–22.2) | 16.5<br>(10.3–22.5) | 3.2<br>(1.7–4.9)   | 3.2<br>(1.7–4.9)   | 6.0<br>(<0.1–12.1)  | 6.0<br>(<0.1–12.1)  |
| Kuwait               | 48.6<br>(24.9–64.5) | 49.6<br>(26.2–65.6) | 3.0<br>(0.0–11.3)  | 2.8<br>(0.0–10.5)  | <0.1<br>(<0.1–<0.1)     | <0.1<br>(<0.1–<0.1) | 13.4<br>(10.0–17.5) | 12.7<br>(9.4–16.7)  | 3.7<br>(1.5–6.0)   | 3.7<br>(1.5–6.0)   | 11.3<br>(8.3–14.9)  | 11.3<br>(8.3–15.0)  | 27.2<br>(19.1–36.9)        | 27.2<br>(19.2–36.9) | 2.2<br>(0.9–5.1)   | 2.0<br>(0.8–4.7)   | 10.9<br>(7.6–14.6)          | 11.0<br>(7.7–14.7) | 18.4<br>(12.0–25.1) | 18.2<br>(12.1–24.4) | 13.1<br>(7.6–18.0) | 13.1<br>(7.6–18.0) | 3.1<br>(<0.1–15.6)  | 3.1<br>(<0.1–15.6)  |
| Lebanon              | 53.4<br>(33.6–67.8) | 56.2<br>(35.6–71.3) | 5.9<br>(0.2–19.5)  | 4.7<br>(0.1–15.7)  | <0.1<br>(<0.1–0.1)      | 0.1<br>(<0.1–0.1)   | 16.8<br>(9.4–26.8)  | 13.7<br>(7.4–22.3)  | 5.0<br>(2.1–8.0)   | 5.0<br>(2.1–8.0)   | 13.1<br>(7.3–20.9)  | 12.0<br>(6.5–19.6)  | 15.2<br>(9.5–22.6)         | 15.3<br>(9.8–22.7)  | 2.5<br>(1.2–5.9)   | 1.6<br>(0.7–3.7)   | 10.8<br>(6.4–15.6)          | 12.3<br>(7.5–17.7) | 19.4<br>(12.7–26.6) | 19.5<br>(12.9–26.2) | 0.1<br>(<0.1–0.2)  | 0.1<br>(<0.1–0.2)  | 14.0<br>(10.4–17.5) | 14.0<br>(10.4–17.5) |
| Libya                | 57.5<br>(33.2–72.8) | 55.6<br>(32.1–71.0) | 11.6<br>(0.6–31.1) | 7.6<br>(0.1–24.5)  | <0.1<br>(<0.1–0.1)      | <0.1<br>(<0.1–0.1)  | 11.0<br>(6.2–17.7)  | 11.2<br>(6.4–17.5)  | 4.5<br>(1.9–7.4)   | 4.5<br>(1.9–7.4)   | 8.5<br>(4.8–13.6)   | 9.3<br>(5.2–14.3)   | 19.1<br>(11.5–29.3)        | 19.2<br>(11.6–29.3) | 3.3<br>(1.4–7.3)   | 3.5<br>(1.7–7.8)   | 4.8<br>(2.3–8.3)            | 4.5<br>(2.2–7.7)   | 16.8<br>(10.8–23.2) | 16.8<br>(10.9–23.1) | 8.2<br>(4.7–12.0)  | 8.2<br>(4.7–12.0)  | 2.8<br>(<0.1–9.8)   | 2.8<br>(<0.1–9.8)   |
| Morocco              | 44.8<br>(26.6–61.6) | 41.3<br>(23.7–58.6) | 4.5<br>(0.1–15.1)  | 5.2<br>(0.2–16.2)  | 1.2<br>(0.5–2.5)        | 1.3<br>(0.5–2.5)    | 27.9<br>(16.2–42.7) | 28.3<br>(16.4–41.8) | 7.6<br>(3.2–12.2)  | 7.6<br>(3.2–12.2)  | 20.9<br>(11.9–31.8) | 22.9<br>(13.2–34.3) | 17.5<br>(11.4–25.0)        | 17.7<br>(12.0–25.0) | 1.6<br>(0.6–3.6)   | 2.0<br>(0.9–4.4)   | 10.0<br>(6.0–14.8)          | 10.3<br>(6.0–15.7) | 10.6<br>(6.1–15.1)  | 10.8<br>(6.4–15.2)  | 2.5<br>(1.6–3.4)   | 2.5<br>(1.6–3.4)   | 8.2<br>(4.8–11.8)   | 8.2<br>(4.8–11.8)   |
| Oman                 | 59.7<br>(39.9–73.0) | 61.1<br>(40.5–74.3) | 7.1<br>(0.2–22.1)  | 7.3<br>(0.2–23.0)  | 0.1<br>(<0.1–0.3)       | 0.1<br>(<0.1–0.3)   | 15.0<br>(8.6–23.7)  | 13.2<br>(7.7–21.1)  | 5.0<br>(2.0–8.2)   | 5.0<br>(2.0–8.2)   | 12.0<br>(6.9–19.0)  | 11.2<br>(6.5–17.6)  | 21.5<br>(13.4–31.3)        | 21.6<br>(13.5–31.3) | 6.2<br>(3.7–12.3)  | 6.2<br>(3.8–12.4)  | 6.1<br>(3.0–9.9)            | 6.0<br>(3.1–9.7)   | 11.3<br>(7.0–16.2)  | 12.1<br>(7.7–17.0)  | 6.6<br>(<0.1–22.3) | 6.6<br>(<0.1–22.3) | 1.3<br>(<0.1–13.3)  | 1.3<br>(<0.1–13.3)  |
| Palestine            | 50.6<br>(27.9–66.6) | 49.5<br>(26.3–66.3) | 5.0<br>(0.1–17.0)  | 5.7<br>(0.1–18.8)  | 0.3<br>(0.1–0.6)        | 0.3<br>(0.1–0.6)    | 11.5<br>(7.2–17.2)  | 9.8<br>(6.2–14.6)   | 7.1<br>(3.0–11.4)  | 7.1<br>(3.0–11.4)  | 8.6<br>(5.4–12.8)   | 8.4<br>(5.2–12.5)   | 16.1<br>(10.1–24.7)        | 16.2<br>(10.3–24.7) | 2.2<br>(1.0–5.0)   | 2.3<br>(1.0–5.2)   | 8.5<br>(4.6–13.4)           | 7.5<br>(3.9–11.9)  | 16.2<br>(10.3–22.3) | 16.2<br>(10.4–22.3) | 2.2<br>(0.9–4.0)   | 2.2<br>(0.9–4.0)   | 3.9<br>(<0.1–10.5)  | 3.9<br>(<0.1–10.5)  |
| Qatar                | 59.1<br>(35.9–73.4) | 56.8<br>(34.3–71.8) | 5.0<br>(0.0–17.7)  | 5.0<br>(0.0–17.6)  | <0.1<br>(<0.1–<0.1)     | <0.1<br>(<0.1–<0.1) | 10.3<br>(6.0–16.9)  | 12.1<br>(7.0–18.8)  | 3.8<br>(1.5–6.3)   | 3.8<br>(1.5–6.3)   | 8.5<br>(4.9–13.8)   | 10.6<br>(6.2–16.4)  | 31.2<br>(22.2–41.1)        | 31.2<br>(22.5–41.1) | 2.9<br>(1.3–7.1)   | 3.0<br>(1.3–6.6)   | 11.2<br>(7.3–15.5)          | 9.6<br>(6.1–13.9)  | 14.4<br>(9.0–20.5)  | 15.1<br>(9.9–20.6)  | 10.6<br>(3.7–19.5) | 10.6<br>(3.7–19.5) | 1.8<br>(<0.1–15.2)  | 1.8<br>(<0.1–15.2)  |
| Saudi Arabia         | 61.7<br>(36.4–78.0) | 61.7<br>(36.2–77.1) | 7.1<br>(0.0–23.3)  | 7.0<br>(0.0–23.6)  | 0.1<br>(<0.1–0.2)       | 0.1<br>(<0.1–0.2)   | 4.5<br>(2.4–8.0)    | 4.8<br>(2.6–8.1)    | 4.2<br>(1.7–6.7)   | 4.2<br>(1.7–6.7)   | 4.1<br>(2.2–7.2)    | 4.6<br>(2.5–7.7)    | 27.1<br>(18.7–37.3)        | 27.1<br>(18.6–37.3) | 4.8<br>(2.4–10.6)  | 5.1<br>(2.5–11.1)  | 5.0<br>(2.4–8.6)            | 5.4<br>(2.8–8.7)   | 15.8<br>(10.0–22.2) | 16.3<br>(10.5–22.3) | 9.7<br>(5.9–14.1)  | 9.7<br>(5.9–14.1)  | 2.4<br>(<0.1–8.8)   | 2.4<br>(<0.1–8.8)   |
| Sudan                | 67.5<br>(51.2–79.9) | 70.2<br>(53.7–81.6) | 11.9<br>(0.9–32.3) | 13.3<br>(1.3–34.7) | 14.7<br>(7.5–24.8)      | 14.6<br>(7.4–24.8)  | 12.5<br>(6.5–21.8)  | 10.6<br>(5.8–17.3)  | 17.7<br>(7.9–26.7) | 17.7<br>(7.9–26.7) | 7.4<br>(3.7–13.0)   | 7.0<br>(3.7–11.6)   | 19.6<br>(11.5–30.0)        | 19.6<br>(11.5–30.2) | 13.0<br>(8.4–23.5) | 13.4<br>(8.5–23.7) | 5.3<br>(2.5–9.2)            | 6.0<br>(2.7–10.0)  | 12.5<br>(8.3–17.1)  | 12.3<br>(8.3–16.8)  | 8.3<br>(3.6–15.7)  | 8.3<br>(3.6–15.7)  | 1.5<br>(<0.1–7.2)   | 1.5<br>(<0.1–7.2)   |
| Syrian Arab Republic | 68.4<br>(45.9–81.3) | 68.4<br>(45.3–81.4) | 16.4<br>(1.6–41.4) | 16.3<br>(1.5–42.1) | <0.1<br>(<0.1–0.1)      | <0.1<br>(<0.1–0.1)  | 5.5<br>(3.1–9.0)    | 4.7<br>(2.7–7.8)    | 4.9<br>(2.0–7.9)   | 4.9<br>(2.0–7.9)   | 4.3<br>(2.4–6.9)    | 4.0<br>(2.3–6.7)    | 15.9<br>(9.9–23.6)         | 16.0<br>(9.7–23.6)  | 6.9<br>(4.3–13.7)  | 5.9<br>(3.5–12.6)  | 3.3<br>(1.6–5.8)            | 3.0<br>(1.4–5.4)   | 14.3<br>(8.7–20.0)  | 14.4<br>(9.0–20.4)  | 4.4<br>(2.5–6.3)   | 4.4<br>(2.5–6.3)   | 7.7<br>(2.5–12.6)   | 7.7<br>(2.5–12.6)   |
| Tunisia              | 50.0<br>(27.6–65.3) | 39.5<br>(21.9–56.1) | 5.0<br>(0.1–15.4)  | 5.1<br>(0.1–17.0)  | 0.1<br>(<0.1–0.1)       | 0.1<br>(<0.1–0.1)   | 14.9<br>(8.3–24.1)  | 25.3<br>(14.8–37.8) | 5.7<br>(2.4–9.2)   | 5.7<br>(2.4–9.2)   | 11.5<br>(6.7–18.8)  | 21.5<br>(12.8–32.2) | 15.9<br>(9.7–24.1)         | 16.3<br>(10.1–24.1) | 1.8<br>(0.8–4.2)   | 1.9<br>(0.8–4.1)   | 11.9<br>(6.5–18.0)          | 12.6<br>(6.9–19.7) | 16.2<br>(10.5–22.2) | 16.4<br>(10.4–22.4) | 4.5<br>(2.3–6.7)   | 4.5<br>(2.3–6.7)   | 5.1<br>(<0.1–11.3)  | 5.1<br>(<0.1–11.3)  |
| Turkey               | 42.8<br>(21.8–59.2) | 51.9<br>(30.5–66.9) | 5.0<br>(<0.1–16.7) | 5.1<br>(0.1–16.7)  | 0.1<br>(<0.1–0.2)       | 0.1<br>(<0.1–0.2)   | 14.4<br>(9.3–20.7)  | 13.7<br>(9.1–20.1)  | 5.8<br>(2.4–9.3)   | 5.8<br>(2.4–9.3)   | 11.6<br>(7.4–16.6)  | 11.7<br>(7.7–17.2)  | 13.7<br>(8.7–20.4)         | 13.8<br>(8.9–20.5)  | 1.9<br>(0.8–4.1)   | 1.9<br>(0.8–4.4)   | 7.4<br>(3.0–12.5)           | 6.5<br>(2.6–11.2)  | 18.0<br>(11.5–24.7) | 18.6<br>(11.9–25.2) | 0.4<br>(0.1–0.7)   | 0.4<br>(0.1–0.7)   | 18.3<br>(13.7–23.4) | 18.3<br>(13.7–23.4) |

|                                        | Child wasting       |                     | Child stunting     |                    | Household air pollution |                     | Low birth weight    |                     | Handwashing        |                    | Short gestation     |                     | Ambient particulate matter |                     | Child underweight   |                     | Non-exclusive breastfeeding |                    | Secondhand smoke    |                     | High temperature   |                    | Low temperature     |                     |
|----------------------------------------|---------------------|---------------------|--------------------|--------------------|-------------------------|---------------------|---------------------|---------------------|--------------------|--------------------|---------------------|---------------------|----------------------------|---------------------|---------------------|---------------------|-----------------------------|--------------------|---------------------|---------------------|--------------------|--------------------|---------------------|---------------------|
|                                        | M                   | F                   | M                  | F                  | M                       | F                   | M                   | F                   | M                  | F                  | M                   | F                   | M                          | F                   | M                   | F                   | M                           | F                  | M                   | F                   | M                  | F                  | M                   | F                   |
| United Arab Emirates                   | 65.5<br>(43.9–78.4) | 64.7<br>(43.7–78.0) | 7.6<br>(0.1–24.0)  | 7.6<br>(0.1–23.8)  | <0.1<br>(<0.1–<0.1)     | <0.1<br>(<0.1–<0.1) | 9.6<br>(5.2–15.8)   | 10.0<br>(5.7–16.8)  | 3.8<br>(1.5–6.2)   | 3.8<br>(1.5–6.2)   | 7.9<br>(4.2–13.0)   | 8.6<br>(4.9–14.5)   | 21.3<br>(13.7–30.8)        | 21.3<br>(13.8–30.8) | 4.2<br>(2.0–9.6)    | 4.5<br>(2.2–9.5)    | 7.1<br>(4.2–10.3)           | 7.0<br>(4.3–10.3)  | 14.2<br>(9.0–19.9)  | 15.3<br>(9.6–20.6)  | 8.4<br>(<0.1–25.0) | 8.4<br>(<0.1–25.0) | 1.9<br>(<0.1–18.2)  | 1.9<br>(<0.1–18.2)  |
| Yemen                                  | 63.0<br>(43.7–78.2) | 69.2<br>(50.6–81.0) | 14.8<br>(1.2–35.0) | 16.7<br>(1.5–40.5) | 15.0<br>(7.5–25.2)      | 14.9<br>(7.3–25.0)  | 19.9<br>(8.9–34.4)  | 13.6<br>(6.9–23.5)  | 13.5<br>(5.8–20.7) | 13.5<br>(5.8–20.7) | 15.9<br>(7.2–27.0)  | 10.6<br>(5.3–18.4)  | 15.9<br>(8.5–25.7)         | 16.0<br>(8.4–25.8)  | 16.6<br>(10.4–29.3) | 18.1<br>(12.0–31.4) | 11.1<br>(6.0–17.1)          | 11.2<br>(5.8–17.7) | 15.4<br>(9.8–21.1)  | 15.5<br>(10.0–21.4) | 5.5<br>(1.6–12.3)  | 5.5<br>(1.6–12.3)  | 0.9<br>(<0.1–5.1)   | 0.9<br>(<0.1–5.1)   |
| South Asia                             | 46.5<br>(35.8–53.8) | 51.3<br>(39.8–58.7) | 10.0<br>(0.9–25.1) | 11.5<br>(1.0–28.1) | 22.2<br>(13.5–31.8)     | 22.0<br>(13.4–31.6) | 36.5<br>(32.3–40.6) | 31.3<br>(27.5–35.4) | 12.8<br>(5.5–19.5) | 12.8<br>(5.6–19.8) | 22.6<br>(19.7–25.6) | 20.5<br>(17.8–23.9) | 22.4<br>(16.1–29.2)        | 22.9<br>(16.6–29.9) | 10.5<br>(7.0–18.7)  | 11.8<br>(7.9–20.9)  | 6.3<br>(3.5–9.6)            | 6.9<br>(3.8–10.4)  | 9.5<br>(5.1–14.2)   | 9.7<br>(5.4–14.4)   | 8.1<br>(4.9–12.2)  | 8.3<br>(5.0–12.3)  | 3.1<br>(<0.1–8.8)   | 3.1<br>(<0.1–8.8)   |
| Bangladesh                             | 41.3<br>(26.4–55.1) | 49.8<br>(34.8–63.2) | 8.2<br>(0.3–22.9)  | 9.4<br>(0.5–25.7)  | 26.5<br>(16.1–38.7)     | 26.4<br>(15.8–38.6) | 40.2<br>(27.9–52.1) | 30.8<br>(21.1–41.8) | 18.1<br>(8.1–27.1) | 18.1<br>(8.1–27.1) | 26.1<br>(17.7–34.5) | 21.2<br>(14.3–29.1) | 17.6<br>(11.7–23.5)        | 17.7<br>(11.9–23.7) | 7.8<br>(4.5–14.7)   | 9.6<br>(5.9–18.6)   | 6.1<br>(2.8–10.3)           | 6.0<br>(2.7–10.2)  | 10.2<br>(5.1–16.0)  | 10.2<br>(5.2–15.8)  | 5.9<br>(2.7–9.8)   | 5.9<br>(2.7–9.8)   | 1.3<br>(<0.1–4.8)   | 1.3<br>(<0.1–4.8)   |
| Bhutan                                 | 45.2<br>(27.6–58.6) | 52.6<br>(32.2–66.7) | 7.9<br>(0.2–22.4)  | 9.2<br>(0.3–26.5)  | 20.1<br>(10.9–31.5)     | 20.0<br>(10.8–31.3) | 27.7<br>(19.0–37.7) | 21.7<br>(13.6–32.8) | 6.1<br>(2.5–9.8)   | 6.1<br>(2.5–9.8)   | 17.3<br>(11.8–23.9) | 14.4<br>(8.9–21.8)  | 13.6<br>(9.0–19.6)         | 13.7<br>(9.0–20.0)  | 4.5<br>(2.3–9.2)    | 5.4<br>(2.9–11.5)   | 6.7<br>(3.6–10.6)           | 7.0<br>(3.8–10.7)  | 4.9<br>(2.7–7.6)    | 5.0<br>(2.7–7.5)    | <0.1<br>(<0.1–0.1) | <0.1<br>(<0.1–0.1) | 18.6<br>(11.8–26.9) | 18.6<br>(11.8–26.9) |
| India                                  | 44.7<br>(35.2–51.6) | 50.3<br>(39.7–57.7) | 9.5<br>(0.9–23.6)  | 11.2<br>(1.1–27.4) | 21.8<br>(13.3–31.2)     | 21.5<br>(13.1–30.8) | 40.2<br>(35.9–44.9) | 33.8<br>(29.7–38.5) | 12.4<br>(5.4–19.0) | 12.5<br>(5.5–19.1) | 24.4<br>(21.5–27.7) | 21.7<br>(18.9–25.2) | 24.2<br>(17.6–31.3)        | 25.0<br>(18.3–32.2) | 10.2<br>(6.9–18.4)  | 12.1<br>(8.2–21.2)  | 6.1<br>(3.1–9.5)            | 6.7<br>(3.4–10.6)  | 9.8<br>(5.3–14.6)   | 10.2<br>(5.6–15.0)  | 8.1<br>(4.6–12.4)  | 8.3<br>(4.7–12.6)  | 2.3<br>(<0.1–7.6)   | 2.3<br>(<0.1–7.8)   |
| Nepal                                  | 36.4<br>(22.5–50.1) | 44.8<br>(28.7–59.9) | 4.7<br>(0.1–13.5)  | 6.1<br>(0.1–18.3)  | 27.4<br>(16.8–39.0)     | 27.2<br>(16.3–39.0) | 42.9<br>(31.5–53.7) | 33.1<br>(22.9–43.3) | 11.3<br>(4.9–17.8) | 11.3<br>(4.9–17.8) | 29.0<br>(21.1–36.8) | 22.0<br>(14.9–29.7) | 19.8<br>(12.2–28.1)        | 19.9<br>(12.4–28.4) | 4.3<br>(2.2–9.1)    | 5.5<br>(3.1–11.2)   | 4.9<br>(2.4–7.9)            | 5.3<br>(2.7–8.4)   | 7.2<br>(3.1–12.2)   | 7.3<br>(3.2–12.2)   | 1.4<br>(0.7–2.2)   | 1.4<br>(0.7–2.2)   | 13.0<br>(7.6–19.0)  | 13.0<br>(7.6–19.0)  |
| Pakistan                               | 53.5<br>(39.1–64.2) | 54.7<br>(39.6–65.9) | 12.4<br>(1.2–30.6) | 13.0<br>(1.0–31.7) | 21.7<br>(12.5–32.5)     | 21.7<br>(12.6–32.7) | 24.8<br>(18.5–31.6) | 24.6<br>(17.7–31.4) | 12.4<br>(5.3–19.2) | 12.4<br>(5.2–19.2) | 16.5<br>(12.2–21.3) | 17.2<br>(12.3–22.1) | 18.8<br>(12.5–26.1)        | 18.7<br>(12.5–25.7) | 12.3<br>(7.8–21.5)  | 12.2<br>(7.7–22.0)  | 7.2<br>(4.2–10.6)           | 7.8<br>(4.6–11.3)  | 8.8<br>(4.7–13.1)   | 8.7<br>(4.8–12.8)   | 9.1<br>(5.3–17.1)  | 9.3<br>(5.6–15.9)  | 5.0<br>(<0.1–12.8)  | 4.9<br>(<0.1–12.4)  |
| Southeast Asia, East Asia, and Oceania | 54.3<br>(36.8–65.2) | 56.0<br>(37.7–66.6) | 9.3<br>(0.4–26.0)  | 10.4<br>(0.5–29.0) | 17.3<br>(9.7–26.4)      | 17.8<br>(10.1–26.9) | 15.6<br>(13.5–17.7) | 13.9<br>(12.3–15.6) | 7.4<br>(3.1–11.8)  | 7.6<br>(3.2–12.0)  | 10.5<br>(9.0–12.1)  | 9.9<br>(8.7–11.2)   | 11.5<br>(8.0–15.7)         | 11.2<br>(7.8–15.2)  | 6.7<br>(4.2–13.3)   | 7.5<br>(4.7–15.0)   | 8.2<br>(5.4–11.5)           | 8.1<br>(5.2–11.2)  | 14.8<br>(9.0–20.8)  | 14.7<br>(8.9–20.6)  | 1.4<br>(<0.1–7.0)  | 1.4<br>(<0.1–6.5)  | 4.4<br>(2.4–6.4)    | 4.1<br>(2.2–6.1)    |
| East Asia                              | 43.0<br>(23.3–55.5) | 44.3<br>(24.9–56.4) | 6.0<br>(0.1–19.5)  | 6.5<br>(0.1–20.3)  | 8.5<br>(4.0–15.2)       | 8.7<br>(4.2–15.3)   | 15.1<br>(13.8–16.5) | 15.7<br>(14.4–16.9) | 4.2<br>(1.7–6.8)   | 4.2<br>(1.7–6.8)   | 11.2<br>(10.2–12.3) | 12.1<br>(10.9–13.2) | 19.4<br>(13.8–25.5)        | 19.0<br>(13.6–25.1) | 3.3<br>(1.6–7.1)    | 3.6<br>(1.9–7.6)    | 8.8<br>(6.1–11.6)           | 8.8<br>(6.0–11.5)  | 19.6<br>(12.8–26.3) | 19.6<br>(12.9–26.2) | 0.6<br>(<0.1–1.1)  | 0.6<br>(<0.1–1.1)  | 13.9<br>(8.6–18.7)  | 13.7<br>(8.5–18.3)  |
| China                                  | 42.9<br>(23.1–55.5) | 44.2<br>(24.7–56.2) | 5.9<br>(0.1–19.4)  | 6.4<br>(0.1–20.2)  | 8.0<br>(3.6–14.6)       | 8.1<br>(3.7–14.7)   | 14.8<br>(13.6–16.2) | 15.4<br>(14.1–16.6) | 4.3<br>(1.7–7.0)   | 4.3<br>(1.7–6.9)   | 11.0<br>(10.1–12.0) | 11.9<br>(10.9–13.0) | 19.6<br>(13.9–25.7)        | 19.2<br>(13.7–25.3) | 3.2<br>(1.5–6.9)    | 3.4<br>(1.8–7.3)    | 8.9<br>(6.1–11.8)           | 8.9<br>(6.1–11.7)  | 19.6<br>(12.9–26.4) | 19.7<br>(13.0–26.3) | 0.6<br>(<0.1–1.1)  | 0.6<br>(<0.1–1.1)  | 13.8<br>(8.6–18.4)  | 13.4<br>(8.4–17.9)  |
| Democratic People's Republic of Korea  | 45.9<br>(29.6–59.4) | 47.0<br>(31.3–60.5) | 8.8<br>(0.4–25.1)  | 9.0<br>(0.4–25.3)  | 24.2<br>(13.7–36.5)     | 24.2<br>(13.6–36.5) | 24.2<br>(16.6–34.2) | 23.1<br>(15.7–31.5) | 2.3<br>(0.9–3.7)   | 2.3<br>(0.9–3.7)   | 16.5<br>(11.2–23.3) | 16.4<br>(11.1–22.7) | 14.6<br>(9.2–20.8)         | 14.6<br>(9.3–20.9)  | 7.1<br>(4.1–14.3)   | 7.6<br>(4.5–14.2)   | 5.8<br>(3.5–8.6)            | 5.9<br>(3.6–8.7)   | 18.0<br>(11.3–24.4) | 18.0<br>(11.5–24.5) | 0.1<br>(<0.1–0.7)  | 0.1<br>(<0.1–0.7)  | 19.3<br>(11.7–29.7) | 19.3<br>(11.7–29.7) |
| Taiwan (Province of China)             | 46.1<br>(22.3–63.5) | 44.6<br>(21.3–62.2) | 3.4<br>(0.0–12.2)  | 3.4<br>(0.0–12.0)  | 0.6<br>(0.1–1.6)        | 0.6<br>(0.1–1.6)    | 8.0<br>(6.0–10.4)   | 8.7<br>(6.5–11.4)   | 1.8<br>(0.7–3.0)   | 1.8<br>(0.7–3.0)   | 6.3<br>(4.7–8.2)    | 6.9<br>(5.2–9.2)    | 12.3<br>(8.0–17.9)         | 12.3<br>(7.9–17.9)  | 1.8<br>(0.7–4.4)    | 1.8<br>(0.7–4.2)    | 5.8<br>(3.6–8.3)            | 5.2<br>(3.2–7.4)   | 14.0<br>(8.4–19.9)  | 15.0<br>(9.3–20.6)  | 0.9<br>(0.2–2.3)   | 0.9<br>(0.2–2.3)   | 3.5<br>(<0.1–6.8)   | 3.5<br>(<0.1–6.8)   |



|                                  | Child wasting       |                     | Child stunting     |                    | Household air pollution |                     | Low birth weight    |                     | Handwashing        |                    | Short gestation    |                     | Ambient particulate matter |                   | Child underweight |                   | Non-exclusive breastfeeding |                   | Secondhand smoke   |                    | High temperature   |                    | Low temperature    |                    |
|----------------------------------|---------------------|---------------------|--------------------|--------------------|-------------------------|---------------------|---------------------|---------------------|--------------------|--------------------|--------------------|---------------------|----------------------------|-------------------|-------------------|-------------------|-----------------------------|-------------------|--------------------|--------------------|--------------------|--------------------|--------------------|--------------------|
|                                  | M                   | F                   | M                  | F                  | M                       | F                   | M                   | F                   | M                  | F                  | M                  | F                   | M                          | F                 | M                 | F                 | M                           | F                 | M                  | F                  | M                  | F                  | M                  | F                  |
| Oceania                          | 61.2<br>(45.7–71.9) | 62.8<br>(45.5–73.9) | 15.7<br>(1.3–37.3) | 16.3<br>(1.0–39.4) | 41.8<br>(26.0–55.1)     | 41.7<br>(25.9–55.2) | 15.8<br>(11.2–21.6) | 12.8<br>(8.8–17.3)  | 11.9<br>(5.0–18.6) | 11.9<br>(5.0–18.6) | 10.4<br>(7.2–14.4) | 8.6<br>(6.0–11.9)   | 3.9<br>(1.0–10.5)          | 4.0<br>(1.0–10.6) | 7.3<br>(3.6–14.9) | 6.5<br>(2.9–14.3) | 5.7<br>(2.9–9.1)            | 6.0<br>(3.2–9.4)  | 9.9<br>(4.7–15.9)  | 9.5<br>(4.5–15.5)  | 0.4<br>(<0.1–2.0)  | 0.4<br>(<0.1–1.9)  | 1.6<br>(<0.1–3.5)  | 1.6<br>(<0.1–3.5)  |
| Fiji                             | 62.1<br>(42.1–75.0) | 62.4<br>(41.6–75.6) | 2.8<br>(0.0–10.8)  | 4.7<br>(<0.1–16.3) | 5.8<br>(1.9–12.3)       | 5.8<br>(1.9–12.3)   | 9.0<br>(5.6–13.3)   | 9.1<br>(5.6–13.6)   | 2.9<br>(1.2–4.8)   | 2.9<br>(1.2–4.8)   | 6.9<br>(4.3–10.5)  | 7.0<br>(4.3–10.7)   | 5.5<br>(1.6–13.1)          | 5.5<br>(1.6–13.1) | 3.0<br>(1.3–6.6)  | 2.8<br>(1.2–6.2)  | 5.4<br>(3.0–8.2)            | 6.0<br>(3.4–8.9)  | 7.3<br>(3.3–12.2)  | 7.3<br>(3.3–12.3)  | 0.5<br>(<0.1–2.4)  | 0.5<br>(<0.1–2.4)  | <0.1<br>(<0.1–1.7) | <0.1<br>(<0.1–1.7) |
| Kiribati                         | 63.1<br>(43.3–76.0) | 65.1<br>(45.9–77.3) | 10.3<br>(0.3–29.4) | 10.6<br>(0.4–30.2) | 28.5<br>(16.3–42.4)     | 28.5<br>(16.3–42.4) | 11.6<br>(7.2–18.0)  | 9.7<br>(5.8–15.0)   | 6.5<br>(2.7–10.4)  | 6.5<br>(2.7–10.4)  | 8.0<br>(4.9–12.5)  | 7.1<br>(4.1–11.0)   | 3.3<br>(1.1–7.8)           | 3.3<br>(1.1–7.7)  | 4.6<br>(2.4–9.9)  | 4.4<br>(2.3–9.3)  | 5.8<br>(3.0–9.1)            | 6.3<br>(3.3–9.7)  | 12.6<br>(6.8–18.9) | 12.1<br>(6.5–18.4) | 0.9<br>(<0.1–5.0)  | 0.9<br>(<0.1–5.0)  | <0.1<br>(<0.1–0.1) | <0.1<br>(<0.1–0.1) |
| Marshall Islands                 | 55.8<br>(35.7–69.6) | 56.6<br>(36.3–70.4) | 7.0<br>(0.1–21.4)  | 7.6<br>(0.2–23.7)  | 10.0<br>(4.2–18.5)      | 9.9<br>(4.2–18.6)   | 13.6<br>(8.8–19.9)  | 12.4<br>(7.6–18.5)  | 4.5<br>(1.8–7.3)   | 4.5<br>(1.8–7.3)   | 9.8<br>(6.4–14.6)  | 9.0<br>(5.5–13.7)   | 4.2<br>(1.6–8.8)           | 4.2<br>(1.6–8.8)  | 3.8<br>(1.8–8.5)  | 3.6<br>(1.6–7.7)  | 6.9<br>(4.1–10.3)           | 6.8<br>(4.1–9.8)  | 10.0<br>(5.1–15.4) | 10.0<br>(5.3–14.9) | 0.2<br>(<0.1–11.3) | 0.2<br>(<0.1–11.3) | <0.1<br>(<0.1–0.1) | <0.1<br>(<0.1–0.1) |
| Micronesia (Federated States of) | 57.6<br>(36.2–71.8) | 56.5<br>(35.8–71.0) | 7.3<br>(0.2–22.6)  | 7.2<br>(0.2–22.6)  | 8.8<br>(3.4–16.7)       | 8.9<br>(3.5–16.9)   | 12.9<br>(7.8–19.6)  | 13.2<br>(8.2–20.7)  | 3.9<br>(1.6–6.4)   | 3.9<br>(1.6–6.4)   | 9.4<br>(5.6–14.3)  | 9.8<br>(6.1–15.3)   | 5.0<br>(1.5–11.6)          | 5.0<br>(1.6–11.7) | 3.8<br>(1.7–8.3)  | 3.4<br>(1.5–7.7)  | 6.4<br>(3.5–10.0)           | 7.1<br>(4.0–10.9) | 8.1<br>(3.6–13.6)  | 8.0<br>(3.6–13.3)  | 0.2<br>(<0.1–11.3) | 0.2<br>(<0.1–11.3) | <0.1<br>(<0.1–0.2) | <0.1<br>(<0.1–0.2) |
| Nauru                            | 59.3<br>(37.1–73.0) | 59.6<br>(36.3–73.9) | 6.3<br>(0.0–21.3)  | 6.6<br>(0.0–22.4)  | 0.9<br>(0.2–2.2)        | 0.9<br>(0.2–2.2)    | 9.2<br>(5.7–14.0)   | 7.9<br>(5.1–11.6)   | 3.1<br>(1.2–5.1)   | 3.1<br>(1.2–5.1)   | 6.9<br>(4.3–10.5)  | 6.1<br>(3.9–9.0)    | 2.3<br>(0.7–5.4)           | 2.3<br>(0.7–5.3)  | 3.2<br>(1.4–7.4)  | 3.1<br>(1.3–7.4)  | 5.3<br>(2.9–8.0)            | 5.3<br>(3.0–7.9)  | 8.9<br>(3.8–14.7)  | 8.6<br>(3.8–14.1)  | 2.4<br>(<0.1–31.1) | 2.4<br>(<0.1–31.1) | <0.1<br>(<0.1–0.3) | <0.1<br>(<0.1–0.3) |
| Palau                            | 57.2<br>(34.7–71.0) | 51.2<br>(30.5–63.6) | 5.8<br>(0.0–19.8)  | 5.1<br>(0.0–17.3)  | <0.1<br>(<0.1–<0.1)     | <0.1<br>(<0.1–<0.1) | 10.9<br>(7.3–15.0)  | 15.8<br>(12.7–19.1) | 2.4<br>(0.9–3.9)   | 2.4<br>(0.9–3.9)   | 8.9<br>(5.9–12.3)  | 13.0<br>(10.4–16.0) | 2.7<br>(0.3–6.3)           | 3.0<br>(0.2–7.1)  | 3.0<br>(1.2–7.0)  | 2.5<br>(1.0–5.6)  | 4.3<br>(2.6–6.4)            | 5.9<br>(3.6–8.4)  | 12.5<br>(6.7–18.6) | 12.1<br>(6.8–17.8) | 0.9<br>(<0.1–28.7) | 0.9<br>(<0.1–28.7) | <0.1<br>(<0.1–0.4) | <0.1<br>(<0.1–0.4) |
| Papua New Guinea                 | 61.5<br>(46.0–72.4) | 63.1<br>(45.8–74.4) | 16.0<br>(1.3–38.0) | 16.6<br>(1.0–40.1) | 42.3<br>(26.4–55.8)     | 42.3<br>(26.3–55.8) | 15.9<br>(11.1–21.9) | 12.8<br>(8.6–17.5)  | 12.2<br>(5.2–19.0) | 12.2<br>(5.2–19.0) | 10.4<br>(7.1–14.6) | 8.6<br>(5.8–12.0)   | 3.9<br>(1.0–10.6)          | 4.0<br>(1.0–10.7) | 7.4<br>(3.6–15.2) | 6.6<br>(2.9–14.5) | 5.7<br>(2.9–9.1)            | 6.0<br>(3.1–9.4)  | 9.9<br>(4.7–16.0)  | 9.6<br>(4.5–15.5)  | 0.4<br>(<0.1–1.9)  | 0.4<br>(<0.1–1.9)  | 1.6<br>(<0.1–3.7)  | 1.6<br>(<0.1–3.7)  |
| Samoa                            | 45.0<br>(23.2–60.8) | 44.8<br>(23.2–60.8) | 4.3<br>(0.1–14.4)  | 4.2<br>(0.1–13.8)  | 18.7<br>(9.1–31.3)      | 18.6<br>(9.1–31.4)  | 16.3<br>(10.9–23.5) | 16.9<br>(11.4–24.6) | 2.2<br>(0.9–3.6)   | 2.2<br>(0.9–3.6)   | 12.0<br>(8.0–17.4) | 12.9<br>(8.6–18.6)  | 4.8<br>(1.3–11.3)          | 4.8<br>(1.3–11.4) | 3.1<br>(1.5–6.7)  | 2.6<br>(1.2–5.9)  | 6.2<br>(3.7–9.0)            | 7.2<br>(4.4–10.3) | 14.9<br>(8.8–20.9) | 14.5<br>(8.8–20.4) | 0.4<br>(<0.1–2.2)  | 0.4<br>(<0.1–2.2)  | 0.1<br>(<0.1–1.4)  | 0.1<br>(<0.1–1.4)  |
| Solomon Islands                  | 49.5<br>(30.7–62.6) | 51.6<br>(30.9–65.4) | 9.3<br>(0.5–26.4)  | 9.6<br>(0.4–27.3)  | 42.8<br>(27.4–56.9)     | 42.8<br>(27.3–56.9) | 17.8<br>(12.7–23.1) | 15.2<br>(10.6–20.2) | 4.9<br>(2.0–7.9)   | 4.9<br>(2.0–7.9)   | 12.2<br>(8.7–16.2) | 10.7<br>(7.5–14.1)  | 3.3<br>(0.9–7.6)           | 3.3<br>(0.9–7.7)  | 3.9<br>(1.9–8.4)  | 3.8<br>(1.9–8.2)  | 3.9<br>(2.1–5.8)            | 4.4<br>(2.5–6.6)  | 10.4<br>(5.3–16.1) | 10.2<br>(5.3–15.4) | 0.5<br>(<0.1–3.3)  | 0.5<br>(<0.1–3.3)  | <0.1<br>(<0.1–0.5) | <0.1<br>(<0.1–0.5) |
| Tonga                            | 54.4<br>(33.1–69.1) | 52.1<br>(33.3–67.0) | 5.6<br>(0.1–18.0)  | 5.0<br>(0.1–16.6)  | 9.0<br>(3.5–18.0)       | 9.2<br>(3.7–17.9)   | 13.4<br>(8.6–19.8)  | 16.1<br>(9.8–24.4)  | 3.3<br>(1.3–5.4)   | 3.3<br>(1.3–5.4)   | 10.5<br>(6.7–15.4) | 13.0<br>(8.1–19.5)  | 5.2<br>(1.6–11.7)          | 5.2<br>(1.6–11.8) | 2.3<br>(1.0–5.0)  | 2.2<br>(1.0–4.8)  | 5.6<br>(3.2–8.4)            | 7.5<br>(4.4–10.9) | 12.0<br>(6.5–17.8) | 11.7<br>(6.5–17.5) | 1.2<br>(<0.1–3.0)  | 1.2<br>(<0.1–3.0)  | 0.2<br>(<0.1–2.6)  | 0.2<br>(<0.1–2.6)  |
| Tuvalu                           | 55.3<br>(35.3–69.5) | 56.4<br>(36.3–70.3) | 6.6<br>(0.1–21.0)  | 7.5<br>(0.3–23.5)  | 2.6<br>(0.8–5.7)        | 2.5<br>(0.7–5.6)    | 15.2<br>(9.7–22.1)  | 13.2<br>(8.6–19.3)  | 3.7<br>(1.5–6.1)   | 3.7<br>(1.5–6.1)   | 11.3<br>(7.1–16.5) | 9.9<br>(6.4–14.5)   | 2.8<br>(1.2–5.8)           | 2.7<br>(1.1–5.6)  | 3.7<br>(1.7–8.2)  | 3.3<br>(1.5–7.6)  | 7.2<br>(4.1–10.5)           | 6.5<br>(3.7–9.5)  | 10.5<br>(5.4–16.2) | 10.2<br>(5.1–15.8) | 1.4<br>(<0.1–12.8) | 1.4<br>(<0.1–12.8) | 0.1<br>(<0.1–0.7)  | 0.1<br>(<0.1–0.7)  |
| Vanuatu                          | 52.6<br>(32.5–66.5) | 53.5<br>(31.5–68.5) | 9.8<br>(0.6–27.3)  | 10.5<br>(0.7–28.7) | 33.5<br>(20.0–48.5)     | 33.5<br>(20.0–48.5) | 14.6<br>(9.7–21.5)  | 13.7<br>(9.0–20.1)  | 10.0<br>(4.3–15.7) | 10.0<br>(4.3–15.7) | 10.2<br>(6.8–15.1) | 9.6<br>(6.2–14.0)   | 4.3<br>(1.3–9.8)           | 4.3<br>(1.3–9.8)  | 5.8<br>(3.4–11.8) | 6.3<br>(3.9–12.5) | 7.3<br>(4.1–11.3)           | 8.2<br>(4.5–12.4) | 6.6<br>(2.8–11.6)  | 6.6<br>(2.9–11.3)  | 0.4<br>(<0.1–2.1)  | 0.4<br>(<0.1–2.1)  | <0.1<br>(<0.1–1.8) | <0.1<br>(<0.1–1.8) |

|                                  | Child wasting       |                     | Child stunting     |                    | Household air pollution |                     | Low birth weight    |                     | Handwashing        |                    | Short gestation     |                     | Ambient particulate matter |                    | Child underweight  |                     | Non-exclusive breastfeeding |                    | Secondhand smoke   |                    | High temperature   |                    | Low temperature    |                    |
|----------------------------------|---------------------|---------------------|--------------------|--------------------|-------------------------|---------------------|---------------------|---------------------|--------------------|--------------------|---------------------|---------------------|----------------------------|--------------------|--------------------|---------------------|-----------------------------|--------------------|--------------------|--------------------|--------------------|--------------------|--------------------|--------------------|
|                                  | M                   | F                   | M                  | F                  | M                       | F                   | M                   | F                   | M                  | F                  | M                   | F                   | M                          | F                  | M                  | F                   | M                           | F                  | M                  | F                  | M                  | F                  | M                  | F                  |
| Southeast Asia                   | 58.6<br>(41.4–69.0) | 59.9<br>(42.0–70.4) | 10.0<br>(0.5–28.1) | 11.2<br>(0.7–30.6) | 17.8<br>(9.5–28.2)      | 17.8<br>(9.4–27.9)  | 15.8<br>(12.8–19.0) | 13.4<br>(11.2–15.8) | 8.2<br>(3.4–13.1)  | 8.4<br>(3.5–13.2)  | 10.3<br>(8.2–12.5)  | 9.2<br>(7.6–10.9)   | 8.9<br>(6.0–12.2)          | 8.9<br>(6.0–12.3)  | 8.3<br>(5.2–16.0)  | 9.4<br>(6.1–18.0)   | 8.3<br>(5.1–11.9)           | 8.1<br>(4.9–11.5)  | 13.3<br>(7.6–19.4) | 13.4<br>(7.7–19.5) | 2.0<br>(<0.1–10.7) | 1.9<br>(<0.1–10.2) | 0.3<br>(<0.1–1.6)  | 0.3<br>(<0.1–1.7)  |
| Cambodia                         | 53.7<br>(36.7–65.2) | 54.2<br>(37.4–65.2) | 9.0<br>(0.3–25.4)  | 10.7<br>(0.6–29.5) | 31.7<br>(18.8–46.1)     | 31.7<br>(18.8–46.1) | 21.6<br>(16.6–27.2) | 19.3<br>(14.5–24.5) | 8.6<br>(3.5–13.5)  | 8.6<br>(3.5–13.5)  | 14.2<br>(10.6–18.3) | 13.7<br>(10.2–18.0) | 7.0<br>(3.9–11.3)          | 7.1<br>(3.9–11.3)  | 7.0<br>(4.0–13.9)  | 8.2<br>(4.8–15.9)   | 6.1<br>(3.5–9.1)            | 5.3<br>(3.0–7.9)   | 15.5<br>(9.8–21.5) | 15.8<br>(9.9–21.7) | 2.7<br>(<0.1–21.8) | 2.7<br>(<0.1–21.8) | <0.1<br>(<0.1–0.3) | <0.1<br>(<0.1–0.3) |
| Indonesia                        | 61.8<br>(47.1–72.7) | 65.3<br>(49.3–75.7) | 12.9<br>(1.2–33.0) | 13.4<br>(1.1–35.0) | 8.6<br>(3.7–16.2)       | 8.7<br>(3.7–16.4)   | 14.3<br>(10.5–18.6) | 11.1<br>(7.8–14.7)  | 7.8<br>(3.2–12.3)  | 7.8<br>(3.3–12.3)  | 9.6<br>(7.0–12.5)   | 8.0<br>(5.7–10.8)   | 9.3<br>(6.0–13.5)          | 9.2<br>(6.0–13.3)  | 9.0<br>(5.7–17.0)  | 9.7<br>(6.3–18.3)   | 8.3<br>(5.5–11.3)           | 8.1<br>(5.4–11.0)  | 15.8<br>(9.3–22.5) | 15.9<br>(9.1–22.8) | 0.3<br>(<0.1–3.8)  | 0.4<br>(<0.1–4.0)  | <0.1<br>(<0.1–0.9) | <0.1<br>(<0.1–1.0) |
| Lao People's Democratic Republic | 61.8<br>(42.3–74.4) | 66.0<br>(47.2–78.0) | 10.7<br>(0.6–31.4) | 12.2<br>(0.6–34.6) | 34.0<br>(20.5–49.1)     | 34.0<br>(20.4–49.1) | 11.1<br>(6.5–16.9)  | 8.7<br>(5.3–14.2)   | 10.2<br>(4.3–15.9) | 10.2<br>(4.3–15.9) | 7.2<br>(4.2–11.4)   | 6.5<br>(3.7–10.5)   | 6.6<br>(3.8–10.1)          | 6.6<br>(3.8–10.2)  | 8.8<br>(5.2–17.4)  | 11.2<br>(7.1–21.1)  | 9.7<br>(5.1–14.9)           | 9.3<br>(4.8–14.6)  | 13.0<br>(7.0–19.1) | 13.1<br>(7.3–19.4) | 1.8<br>(0.6–3.9)   | 1.8<br>(0.6–3.9)   | <0.1<br>(<0.1–2.9) | <0.1<br>(<0.1–2.9) |
| Malaysia                         | 57.5<br>(39.4–69.9) | 56.4<br>(39.2–69.1) | 7.2<br>(0.3–21.7)  | 7.3<br>(0.4–22.5)  | 0.1<br>(<0.1–0.3)       | 0.1<br>(<0.1–0.3)   | 18.6<br>(11.6–27.7) | 17.5<br>(11.0–26.3) | 2.0<br>(0.8–3.2)   | 2.0<br>(0.8–3.2)   | 14.0<br>(8.7–20.7)  | 14.0<br>(8.7–21.0)  | 8.8<br>(5.4–13.6)          | 9.0<br>(5.4–13.7)  | 6.8<br>(4.1–13.5)  | 6.5<br>(3.8–13.2)   | 8.4<br>(4.9–12.6)           | 8.5<br>(5.0–12.7)  | 13.0<br>(7.4–19.2) | 13.1<br>(7.5–18.8) | 0.8<br>(<0.1–3.9)  | 0.8<br>(<0.1–3.9)  | <0.1<br>(<0.1–0.8) | <0.1<br>(<0.1–0.8) |
| Maldives                         | 70.3<br>(52.5–81.8) | 64.8<br>(47.2–76.5) | 8.9<br>(0.2–26.7)  | 9.9<br>(0.3–28.5)  | 2.9<br>(1.0–6.9)        | 3.0<br>(1.0–6.7)    | 10.2<br>(5.4–17.3)  | 14.1<br>(8.6–21.6)  | 8.1<br>(3.5–13.0)  | 8.1<br>(3.5–13.0)  | 7.3<br>(3.8–12.6)   | 10.3<br>(6.3–15.6)  | 5.3<br>(3.0–8.5)           | 5.3<br>(3.2–8.4)   | 10.9<br>(6.9–20.7) | 10.2<br>(6.4–19.5)  | 6.6<br>(3.1–10.9)           | 6.8<br>(3.3–11.0)  | 15.6<br>(9.3–22.3) | 15.6<br>(9.1–21.9) | 0.4<br>(<0.1–11.4) | 0.4<br>(<0.1–11.4) | <0.1<br>(<0.1–0.1) | <0.1<br>(<0.1–0.1) |
| Mauritius                        | 65.4<br>(48.3–74.9) | 67.0<br>(50.4–77.7) | 6.5<br>(0.1–20.6)  | 6.5<br>(0.1–21.1)  | 0.2<br>(0.1–0.5)        | 0.2<br>(0.1–0.5)    | 12.6<br>(9.9–15.9)  | 10.8<br>(7.1–14.9)  | 1.1<br>(0.4–1.8)   | 1.1<br>(0.4–1.8)   | 8.7<br>(6.8–11.0)   | 7.9<br>(5.4–10.9)   | 7.6<br>(3.5–13.8)          | 7.6<br>(3.5–13.8)  | 6.6<br>(4.0–13.6)  | 7.0<br>(4.2–14.3)   | 7.8<br>(4.8–11.3)           | 7.8<br>(4.7–11.3)  | 12.0<br>(6.7–17.8) | 12.0<br>(6.6–17.7) | 0.7<br>(<0.1–3.5)  | 0.7<br>(<0.1–3.5)  | <0.1<br>(<0.1–5.4) | <0.1<br>(<0.1–5.4) |
| Myanmar                          | 51.2<br>(34.8–64.8) | 54.0<br>(35.6–66.6) | 5.1<br>(0.1–17.1)  | 7.9<br>(0.3–24.1)  | 24.7<br>(13.8–38.0)     | 24.6<br>(13.7–38.2) | 21.7<br>(14.3–31.2) | 15.3<br>(10.0–21.4) | 11.1<br>(4.7–17.5) | 11.1<br>(4.7–17.5) | 14.6<br>(9.5–21.4)  | 10.9<br>(7.1–15.8)  | 10.5<br>(7.0–14.6)         | 10.6<br>(7.1–14.8) | 5.5<br>(3.0–11.4)  | 7.5<br>(4.7–14.8)   | 8.5<br>(4.6–12.9)           | 9.4<br>(4.9–14.1)  | 8.3<br>(3.8–13.9)  | 8.7<br>(4.0–14.3)  | 2.9<br>(1.3–5.3)   | 2.9<br>(1.3–5.3)   | 1.9<br>(<0.1–4.3)  | 1.9<br>(<0.1–4.3)  |
| Philippines                      | 63.0<br>(42.6–75.7) | 58.9<br>(37.8–72.4) | 11.4<br>(0.3–32.5) | 11.6<br>(0.7–32.0) | 17.0<br>(8.5–27.5)      | 17.0<br>(8.6–27.3)  | 12.3<br>(8.5–16.4)  | 14.2<br>(10.1–18.4) | 6.6<br>(2.7–10.6)  | 6.6<br>(2.7–10.5)  | 7.0<br>(4.7–9.3)    | 8.3<br>(5.9–10.9)   | 8.1<br>(5.4–11.4)          | 8.1<br>(5.3–11.4)  | 10.4<br>(6.6–19.7) | 11.0<br>(7.1–20.7)  | 8.5<br>(5.3–12.0)           | 7.4<br>(4.5–10.5)  | 13.3<br>(7.5–19.4) | 13.4<br>(7.7–19.7) | 2.5<br>(<0.1–23.6) | 2.5<br>(<0.1–23.6) | 0.2<br>(<0.1–0.7)  | 0.2<br>(<0.1–0.8)  |
| Seychelles                       | 54.1<br>(33.3–67.6) | 50.6<br>(31.6–64.3) | 4.7<br>(0.1–15.9)  | 4.4<br>(0.0–15.3)  | 0.1<br>(<0.1–0.2)       | 0.1<br>(<0.1–0.3)   | 15.2<br>(11.2–20.1) | 16.9<br>(12.4–21.8) | 3.9<br>(1.6–6.3)   | 3.9<br>(1.6–6.3)   | 10.9<br>(8.0–14.5)  | 12.7<br>(9.2–16.7)  | 8.2<br>(3.9–14.3)          | 8.4<br>(4.0–14.6)  | 3.2<br>(1.5–7.2)   | 3.0<br>(1.5–6.7)    | 7.7<br>(4.3–11.1)           | 8.0<br>(4.7–11.7)  | 11.2<br>(6.1–16.3) | 11.9<br>(6.8–17.4) | 1.0<br>(<0.1–3.8)  | 1.0<br>(<0.1–3.8)  | 0.2<br>(<0.1–1.3)  | 0.2<br>(<0.1–1.3)  |
| Sri Lanka                        | 69.2<br>(52.1–80.4) | 70.1<br>(53.5–80.7) | 7.0<br>(0.1–22.8)  | 7.0<br>(0.1–22.5)  | 10.0<br>(3.8–20.0)      | 10.0<br>(3.7–20.1)  | 11.1<br>(6.7–16.8)  | 9.5<br>(5.6–14.7)   | 5.0<br>(2.0–8.1)   | 5.0<br>(2.0–8.1)   | 7.7<br>(4.6–11.9)   | 7.0<br>(4.1–10.9)   | 9.7<br>(5.8–14.9)          | 9.7<br>(5.9–14.8)  | 9.5<br>(5.7–18.9)  | 9.4<br>(5.5–18.9)   | 3.6<br>(2.1–5.4)            | 3.7<br>(2.1–5.4)   | 6.6<br>(2.7–11.4)  | 6.4<br>(2.6–11.2)  | 1.2<br>(<0.1–13.3) | 1.2<br>(<0.1–13.3) | <0.1<br>(<0.1–0.8) | <0.1<br>(<0.1–0.8) |
| Thailand                         | 58.0<br>(37.4–71.0) | 59.4<br>(38.3–72.8) | 7.1<br>(0.2–22.0)  | 7.4<br>(0.3–22.5)  | 3.6<br>(1.3–7.8)        | 3.6<br>(1.3–7.8)    | 14.4<br>(9.8–20.4)  | 12.0<br>(7.7–18.4)  | 7.5<br>(3.1–12.1)  | 7.5<br>(3.1–12.1)  | 10.0<br>(6.7–14.2)  | 9.1<br>(5.8–14.0)   | 13.8<br>(9.1–19.7)         | 13.8<br>(8.9–19.7) | 5.1<br>(2.8–10.6)  | 5.3<br>(3.0–11.2)   | 12.2<br>(7.5–17.5)          | 11.3<br>(6.8–16.2) | 10.7<br>(5.9–15.8) | 10.6<br>(5.8–15.8) | 2.9<br>(<0.1–10.6) | 2.9<br>(<0.1–10.6) | <0.1<br>(<0.1–1.0) | <0.1<br>(<0.1–1.0) |
| Timor-Leste                      | 66.5<br>(48.9–77.2) | 72.8<br>(56.2–82.3) | 14.9<br>(1.2–37.3) | 18.5<br>(2.3–43.6) | 30.2<br>(17.1–44.9)     | 30.1<br>(17.1–44.9) | 15.2<br>(9.3–23.6)  | 10.7<br>(6.6–17.6)  | 6.6<br>(2.7–10.6)  | 6.6<br>(2.7–10.6)  | 10.5<br>(6.2–16.6)  | 7.9<br>(4.7–12.8)   | 5.5<br>(2.6–9.8)           | 5.5<br>(2.6–10.0)  | 15.1<br>(9.5–26.1) | 18.2<br>(11.6–32.1) | 6.2<br>(3.5–9.3)            | 6.3<br>(3.6–9.2)   | 10.8<br>(5.1–17.2) | 10.9<br>(5.2–17.2) | 0.5<br>(<0.1–2.1)  | 0.5<br>(<0.1–2.1)  | <0.1<br>(<0.1–1.7) | <0.1<br>(<0.1–1.7) |

|                                  | Child wasting               |                             | Child stunting             |                            | Household air pollution     |                             | Low birth weight            |                             | Handwashing                 |                             | Short gestation             |                             | Ambient particulate matter |                           | Child underweight          |                            | Non-exclusive breastfeeding |                           | Secondhand smoke         |                          | High temperature          |                           | Low temperature              |                              |
|----------------------------------|-----------------------------|-----------------------------|----------------------------|----------------------------|-----------------------------|-----------------------------|-----------------------------|-----------------------------|-----------------------------|-----------------------------|-----------------------------|-----------------------------|----------------------------|---------------------------|----------------------------|----------------------------|-----------------------------|---------------------------|--------------------------|--------------------------|---------------------------|---------------------------|------------------------------|------------------------------|
|                                  | M                           | F                           | M                          | F                          | M                           | F                           | M                           | F                           | M                           | F                           | M                           | F                           | M                          | F                         | M                          | F                          | M                           | F                         | M                        | F                        | M                         | F                         | M                            | F                            |
| Viet Nam                         | 51.5<br>(34.3–64.4)         | 60.9<br>(42.5–72.8)         | 8.1<br>(0.3–23.4)          | 9.2<br>(0.4–27.2)          | 10.1<br>(4.4–18.0)          | 10.0<br>(4.2–18.3)          | 16.2<br>(11.4–22.4)         | 10.3<br>(6.7–15.1)          | 8.6<br>(3.6–13.6)           | 8.6<br>(3.6–13.6)           | 12.3<br>(8.4–17.5)          | 8.3<br>(5.5–12.1)           | 9.6<br>(6.2–14.0)          | 9.7<br>(6.4–14.0)         | 5.9<br>(3.4–12.1)          | 6.9<br>(4.1–13.4)          | 8.9<br>(4.1–14.3)           | 9.9<br>(4.6–15.7)         | 15.9<br>(9.8–22.1)       | 15.9<br>(9.7–22.5)       | 2.7<br>(0.9–5.9)          | 2.7<br>(0.9–5.9)          | 0.2<br>(<0.1–3.2)            | 0.2<br>(<0.1–3.2)            |
| <b>Sub-Saharan Africa</b>        | <b>56.2<br/>(39.6–65.4)</b> | <b>59.8<br/>(42.5–69.2)</b> | <b>12.7<br/>(1.2–31.5)</b> | <b>14.1<br/>(1.3–34.9)</b> | <b>41.5<br/>(29.7–54.1)</b> | <b>41.7<br/>(29.4–54.2)</b> | <b>18.6<br/>(16.5–21.1)</b> | <b>15.7<br/>(13.7–18.2)</b> | <b>22.1<br/>(10.2–32.5)</b> | <b>22.1<br/>(10.2–32.6)</b> | <b>14.9<br/>(13.2–16.9)</b> | <b>13.6<br/>(11.9–15.8)</b> | <b>9.8<br/>(5.6–15.8)</b>  | <b>9.7<br/>(5.4–15.7)</b> | <b>10.9<br/>(7.1–19.5)</b> | <b>11.6<br/>(7.7–20.7)</b> | <b>7.4<br/>(3.8–11.4)</b>   | <b>7.4<br/>(3.8–11.4)</b> | <b>3.6<br/>(1.8–5.6)</b> | <b>3.6<br/>(1.8–5.8)</b> | <b>6.1<br/>(1.0–20.8)</b> | <b>6.0<br/>(1.0–19.7)</b> | <b>1.1<br/>(&lt;0.1–3.5)</b> | <b>1.1<br/>(&lt;0.1–3.6)</b> |
| Central Sub-Saharan Africa       | 48.0<br>(30.6–62.0)         | 53.1<br>(35.2–66.2)         | 9.9<br>(0.6–26.1)          | 12.6<br>(1.0–31.3)         | 37.4<br>(24.9–49.6)         | 37.3<br>(24.6–49.3)         | 22.6<br>(15.8–29.8)         | 17.6<br>(12.3–23.4)         | 22.5<br>(10.4–33.1)         | 22.6<br>(10.4–33.1)         | 18.3<br>(12.8–24.4)         | 16.2<br>(11.2–21.8)         | 8.3<br>(4.0–14.0)          | 8.4<br>(4.0–14.2)         | 6.7<br>(4.1–13.1)          | 8.6<br>(5.3–16.4)          | 6.3<br>(3.5–9.6)            | 6.5<br>(3.7–9.8)          | 3.1<br>(1.4–5.2)         | 3.1<br>(1.3–5.2)         | 1.8<br>(0.5–3.7)          | 1.7<br>(0.4–3.6)          | <0.1<br>(<0.1–2.3)           | <0.1<br>(<0.1–2.4)           |
| Angola                           | 46.2<br>(26.5–62.2)         | 49.8<br>(29.1–64.7)         | 10.9<br>(0.6–30.4)         | 14.4<br>(1.1–36.9)         | 18.2<br>(9.8–29.0)          | 18.2<br>(9.6–29.0)          | 21.2<br>(11.2–33.8)         | 14.8<br>(8.9–22.9)          | 22.3<br>(10.2–32.8)         | 22.3<br>(10.2–32.8)         | 17.2<br>(9.3–27.2)          | 13.5<br>(8.1–21.0)          | 10.7<br>(5.6–17.3)         | 10.8<br>(5.7–17.7)        | 6.8<br>(3.9–13.4)          | 8.2<br>(4.9–15.7)          | 6.9<br>(3.8–10.9)           | 6.6<br>(3.5–10.3)         | 7.2<br>(3.8–10.9)        | 7.1<br>(3.8–10.7)        | 1.7<br>(0.5–3.8)          | 1.7<br>(0.5–3.8)          | <0.1<br>(<0.1–2.9)           | <0.1<br>(<0.1–2.9)           |
| Central African Republic         | 51.2<br>(32.7–65.1)         | 58.2<br>(37.8–73.0)         | 11.2<br>(1.1–28.1)         | 15.6<br>(1.6–36.7)         | 50.0<br>(35.8–62.2)         | 49.9<br>(35.9–62.3)         | 21.5<br>(13.7–31.8)         | 14.5<br>(8.5–22.8)          | 21.6<br>(9.9–31.8)          | 21.6<br>(9.9–31.8)          | 16.1<br>(10.1–24.0)         | 11.8<br>(6.8–18.7)          | 6.3<br>(2.0–13.3)          | 6.3<br>(2.0–13.5)         | 8.1<br>(4.5–15.8)          | 10.2<br>(6.3–18.6)         | 8.0<br>(4.0–12.7)           | 7.7<br>(3.8–12.7)         | 3.2<br>(1.5–5.6)         | 3.3<br>(1.5–5.5)         | 3.8<br>(1.5–7.0)          | 3.8<br>(1.5–7.0)          | <0.1<br>(<0.1–1.2)           | <0.1<br>(<0.1–1.2)           |
| Congo                            | 40.7<br>(22.8–57.3)         | 38.0<br>(19.4–55.0)         | 6.1<br>(0.2–17.6)          | 6.7<br>(0.3–19.8)          | 15.4<br>(7.9–26.1)          | 15.4<br>(8.1–26.1)          | 30.7<br>(18.3–44.2)         | 30.2<br>(18.8–44.8)         | 21.0<br>(9.5–31.0)          | 21.0<br>(9.5–31.0)          | 25.9<br>(15.7–37.2)         | 27.9<br>(17.1–42.0)         | 15.4<br>(8.5–26.1)         | 15.5<br>(8.5–26.3)        | 4.4<br>(2.2–9.0)           | 4.9<br>(2.3–9.8)           | 8.1<br>(4.6–12.7)           | 8.4<br>(4.4–13.6)         | 4.2<br>(1.9–7.0)         | 4.1<br>(2.0–6.6)         | 0.9<br>(<0.1–3.0)         | 0.9<br>(<0.1–3.0)         | <0.1<br>(<0.1–1.9)           | <0.1<br>(<0.1–1.9)           |
| Democratic Republic of the Congo | 47.8<br>(30.5–64.1)         | 53.5<br>(36.2–68.8)         | 9.3<br>(0.4–23.7)          | 11.3<br>(0.9–29.0)         | 43.0<br>(28.6–55.6)         | 43.0<br>(28.3–55.6)         | 23.5<br>(14.1–34.6)         | 19.1<br>(11.6–28.7)         | 23.0<br>(10.6–33.7)         | 23.0<br>(10.6–33.7)         | 19.3<br>(11.4–28.4)         | 18.1<br>(10.8–27.0)         | 7.5<br>(3.2–13.7)          | 7.6<br>(3.3–14.0)         | 6.4<br>(3.6–12.4)          | 8.5<br>(5.1–16.4)          | 5.5<br>(2.9–8.6)            | 6.2<br>(3.3–9.5)          | 1.4<br>(0.4–2.8)         | 1.4<br>(0.4–2.8)         | 1.3<br>(0.1–3.1)          | 1.3<br>(0.1–3.1)          | 0.1<br>(<0.1–2.6)            | 0.1<br>(<0.1–2.6)            |
| Equatorial Guinea                | 43.5<br>(25.1–60.3)         | 43.9<br>(24.1–61.7)         | 7.4<br>(0.5–22.5)          | 6.9<br>(0.4–19.6)          | 4.6<br>(1.7–9.2)            | 4.6<br>(1.8–9.3)            | 28.4<br>(16.8–42.4)         | 29.9<br>(17.5–45.8)         | 19.9<br>(9.0–29.7)          | 19.9<br>(9.0–29.7)          | 26.2<br>(15.3–39.1)         | 29.6<br>(17.1–45.4)         | 20.8<br>(11.2–33.1)        | 20.8<br>(11.3–33.2)       | 2.9<br>(1.4–6.3)           | 3.0<br>(1.3–6.7)           | 9.0<br>(4.8–14.1)           | 9.1<br>(5.0–14.3)         | 3.9<br>(1.6–6.9)         | 4.0<br>(1.6–7.0)         | 0.4<br>(<0.1–1.3)         | 0.4<br>(<0.1–1.3)         | <0.1<br>(<0.1–2.4)           | <0.1<br>(<0.1–2.4)           |
| Gabon                            | 36.2<br>(19.3–53.1)         | 31.8<br>(15.1–48.1)         | 5.0<br>(0.2–17.0)          | 5.5<br>(0.2–17.3)          | 1.7<br>(0.6–3.4)            | 1.8<br>(0.7–3.6)            | 33.1<br>(20.9–49.5)         | 38.0<br>(24.0–55.2)         | 16.9<br>(7.4–25.6)          | 16.9<br>(7.4–25.6)          | 28.2<br>(17.5–42.1)         | 34.7<br>(21.6–50.7)         | 18.2<br>(10.4–29.8)        | 18.3<br>(10.2–29.8)       | 2.4<br>(1.0–5.5)           | 2.9<br>(1.3–5.9)           | 9.9<br>(5.1–15.7)           | 10.1<br>(5.5–16.0)        | 4.6<br>(2.0–7.6)         | 4.7<br>(2.1–7.7)         | 0.7<br>(<0.1–2.6)         | 0.7<br>(<0.1–2.6)         | <0.1<br>(<0.1–1.5)           | <0.1<br>(<0.1–1.5)           |
| Eastern Sub-Saharan Africa       | 54.4<br>(35.9–65.1)         | 56.6<br>(38.3–67.2)         | 12.2<br>(1.0–31.0)         | 12.9<br>(1.0–33.6)         | 46.7<br>(33.5–59.7)         | 46.2<br>(32.5–59.4)         | 17.3<br>(14.8–20.2)         | 15.7<br>(13.0–18.7)         | 22.6<br>(10.4–33.3)         | 22.6<br>(10.4–33.3)         | 14.3<br>(12.2–16.7)         | 13.6<br>(11.2–16.3)         | 5.3<br>(2.7–8.9)           | 5.4<br>(2.8–9.1)          | 8.8<br>(5.6–16.9)          | 9.6<br>(6.3–18.0)          | 6.3<br>(3.2–9.6)            | 6.3<br>(3.4–9.6)          | 3.6<br>(1.5–6.1)         | 3.6<br>(1.5–6.4)         | 2.3<br>(0.3–7.0)          | 2.2<br>(0.3–6.1)          | 1.0<br>(<0.1–3.3)            | 1.1<br>(<0.1–3.4)            |
| Burundi                          | 53.1<br>(35.7–68.1)         | 56.7<br>(37.8–72.0)         | 14.4<br>(1.2–35.9)         | 19.1<br>(2.5–42.3)         | 51.2<br>(37.4–63.5)         | 51.2<br>(37.5–63.5)         | 21.1<br>(11.8–31.5)         | 15.4<br>(8.8–24.8)          | 22.9<br>(10.6–33.7)         | 22.9<br>(10.6–33.7)         | 16.1<br>(9.0–24.2)          | 13.3<br>(7.5–21.3)          | 4.6<br>(1.5–10.1)          | 4.7<br>(1.5–10.2)         | 10.9<br>(6.6–20.9)         | 13.6<br>(8.4–24.7)         | 3.0<br>(1.5–4.9)            | 2.9<br>(1.4–4.8)          | 2.3<br>(0.8–4.3)         | 2.3<br>(0.8–4.3)         | <0.1<br>(<0.1–0.3)        | <0.1<br>(<0.1–0.3)        | <0.1<br>(<0.1–6.1)           | <0.1<br>(<0.1–6.1)           |
| Comoros                          | 47.4<br>(30.0–62.6)         | 54.4<br>(36.3–68.6)         | 9.1<br>(0.7–24.2)          | 13.3<br>(1.5–33.1)         | 34.3<br>(20.7–48.8)         | 34.2<br>(20.7–48.8)         | 30.0<br>(19.1–43.1)         | 24.2<br>(15.4–37.3)         | 21.0<br>(9.6–31.1)          | 21.0<br>(9.6–31.1)          | 24.5<br>(15.2–35.6)         | 20.9<br>(13.2–32.6)         | 5.2<br>(2.9–8.5)           | 5.3<br>(2.9–8.6)          | 5.8<br>(3.2–11.4)          | 8.2<br>(4.7–15.9)          | 9.7<br>(5.7–14.1)           | 9.3<br>(5.4–14.2)         | 5.0<br>(2.3–8.3)         | 5.0<br>(2.3–8.0)         | 0.7<br>(<0.1–2.9)         | 0.7<br>(<0.1–2.9)         | 0.2<br>(<0.1–2.9)            | 0.2<br>(<0.1–2.9)            |
| Djibouti                         | 63.8<br>(46.5–75.6)         | 66.3<br>(49.4–77.9)         | 12.1<br>(1.1–30.9)         | 14.0<br>(1.6–36.3)         | 8.6<br>(3.8–16.3)           | 8.5<br>(3.7–16.1)           | 14.7<br>(9.0–22.2)          | 14.6<br>(8.5–22.9)          | 21.6<br>(9.9–32.0)          | 21.6<br>(9.9–32.0)          | 12.8<br>(7.8–19.3)          | 13.0<br>(7.6–20.6)          | 18.0<br>(9.1–31.0)         | 17.9<br>(8.8–31.0)        | 11.2<br>(7.0–19.7)         | 9.4<br>(5.8–18.1)          | 9.0<br>(4.0–15.1)           | 9.4<br>(4.2–15.7)         | 8.4<br>(3.8–14.0)        | 8.3<br>(3.7–13.6)        | 5.9<br>(<0.1–30.0)        | 5.9<br>(<0.1–30.0)        | 0.2<br>(<0.1–5.2)            | 0.2<br>(<0.1–5.2)            |

|                             | Child wasting       |                     | Child stunting     |                    | Household air pollution |                     | Low birth weight    |                     | Handwashing         |                     | Short gestation     |                     | Ambient particulate matter |                    | Child underweight  |                    | Non-exclusive breastfeeding |                    | Secondhand smoke  |                   | High temperature   |                    | Low temperature    |                    |
|-----------------------------|---------------------|---------------------|--------------------|--------------------|-------------------------|---------------------|---------------------|---------------------|---------------------|---------------------|---------------------|---------------------|----------------------------|--------------------|--------------------|--------------------|-----------------------------|--------------------|-------------------|-------------------|--------------------|--------------------|--------------------|--------------------|
|                             | M                   | F                   | M                  | F                  | M                       | F                   | M                   | F                   | M                   | F                   | M                   | F                   | M                          | F                  | M                  | F                  | M                           | F                  | M                 | F                 | M                  | F                  | M                  | F                  |
| Eritrea                     | 60.0<br>(43.0–73.2) | 65.8<br>(48.0–78.1) | 13.2<br>(0.8–32.6) | 14.6<br>(1.1–36.0) | 33.7<br>(20.0–46.4)     | 33.7<br>(19.8–46.4) | 18.7<br>(11.7–27.5) | 12.7<br>(7.1–20.4)  | 22.6<br>(10.4–33.1) | 22.6<br>(10.4–33.1) | 14.9<br>(9.2–22.0)  | 11.2<br>(6.2–18.0)  | 11.0<br>(5.1–19.1)         | 11.1<br>(5.1–19.2) | 9.6<br>(5.1–18.7)  | 13.7<br>(8.5–25.1) | 3.7<br>(1.2–7.0)            | 3.8<br>(1.2–7.3)   | 3.9<br>(2.0–6.1)  | 4.0<br>(2.1–6.2)  | 4.5<br>(<0.1–22.1) | 4.5<br>(<0.1–22.1) | 0.1<br>(<0.1–2.5)  | 0.1<br>(<0.1–2.5)  |
| Ethiopia                    | 52.3<br>(36.6–62.8) | 56.3<br>(42.3–66.5) | 11.2<br>(1.0–28.1) | 13.3<br>(1.3–32.6) | 49.6<br>(36.4–61.3)     | 49.5<br>(36.1–61.4) | 23.1<br>(18.3–28.3) | 19.8<br>(15.4–25.4) | 23.2<br>(10.7–33.9) | 23.2<br>(10.7–34.0) | 17.8<br>(14.1–22.0) | 17.1<br>(13.2–22.0) | 5.1<br>(2.1–9.6)           | 5.2<br>(2.2–9.8)   | 8.6<br>(5.4–16.1)  | 11.7<br>(7.8–21.3) | 4.4<br>(2.2–7.1)            | 4.5<br>(2.3–7.3)   | 1.4<br>(0.5–2.6)  | 1.3<br>(0.5–2.6)  | 3.7<br>(0.7–12.7)  | 3.6<br>(0.7–11.7)  | 4.0<br>(2.5–5.8)   | 4.0<br>(2.5–6.0)   |
| Kenya                       | 43.0<br>(27.2–52.5) | 47.5<br>(31.4–57.0) | 8.2<br>(0.6–22.6)  | 9.8<br>(0.8–25.8)  | 37.2<br>(25.0–49.2)     | 37.1<br>(25.2–48.9) | 26.6<br>(23.3–29.9) | 23.1<br>(20.0–26.8) | 22.5<br>(10.4–33.1) | 22.5<br>(10.4–33.1) | 22.2<br>(19.4–25.2) | 21.1<br>(18.2–24.4) | 6.2<br>(3.6–9.9)           | 6.2<br>(3.6–9.9)   | 6.2<br>(4.0–11.9)  | 7.7<br>(4.8–14.6)  | 7.5<br>(3.9–11.6)           | 7.9<br>(4.2–11.9)  | 3.9<br>(1.7–6.6)  | 4.0<br>(1.7–7.0)  | 4.2<br>(0.3–16.6)  | 4.3<br>(0.3–17.5)  | 2.4<br>(1.0–4.1)   | 2.4<br>(1.0–4.2)   |
| Madagascar                  | 49.7<br>(32.9–63.9) | 55.2<br>(39.1–68.2) | 11.9<br>(1.2–28.8) | 15.3<br>(1.8–36.2) | 44.6<br>(29.4–58.1)     | 44.6<br>(29.2–58.1) | 29.7<br>(19.3–41.6) | 24.9<br>(16.0–35.2) | 22.4<br>(10.3–33.0) | 22.4<br>(10.3–33.0) | 23.6<br>(15.3–33.0) | 21.2<br>(13.4–30.4) | 4.2<br>(2.1–7.2)           | 4.2<br>(2.1–7.2)   | 8.8<br>(5.3–16.8)  | 10.7<br>(6.4–19.5) | 6.0<br>(3.1–9.6)            | 6.2<br>(3.3–9.7)   | 3.4<br>(1.1–6.7)  | 3.5<br>(1.1–6.7)  | 0.8<br>(<0.1–2.4)  | 0.8<br>(<0.1–2.4)  | 1.0<br>(<0.1–3.8)  | 1.0<br>(<0.1–3.8)  |
| Malawi                      | 45.5<br>(25.0–61.0) | 49.9<br>(28.4–64.6) | 12.2<br>(0.6–32.0) | 14.9<br>(1.4–37.2) | 46.8<br>(31.4–58.9)     | 46.8<br>(31.5–58.9) | 19.1<br>(13.0–27.5) | 16.0<br>(10.5–22.8) | 22.6<br>(10.4–33.3) | 22.6<br>(10.4–33.3) | 15.5<br>(10.3–22.5) | 14.1<br>(9.2–20.3)  | 4.6<br>(2.0–8.5)           | 4.6<br>(2.1–8.6)   | 7.0<br>(4.1–14.2)  | 6.2<br>(3.5–12.6)  | 4.9<br>(2.8–7.3)            | 4.8<br>(2.8–7.3)   | 3.3<br>(1.4–5.6)  | 3.4<br>(1.4–6.1)  | 0.5<br>(<0.1–1.9)  | 0.5<br>(<0.1–1.9)  | 0.2<br>(<0.1–4.4)  | 0.2<br>(<0.1–4.4)  |
| Mozambique                  | 56.2<br>(34.0–70.7) | 54.8<br>(33.3–69.5) | 11.9<br>(0.5–33.3) | 10.0<br>(0.1–31.2) | 50.3<br>(36.0–62.0)     | 50.3<br>(36.2–61.9) | 13.0<br>(7.5–20.0)  | 12.8<br>(8.0–20.3)  | 22.2<br>(10.2–32.7) | 22.2<br>(10.2–32.7) | 9.6<br>(5.5–14.9)   | 10.8<br>(6.8–17.3)  | 3.5<br>(1.4–6.7)           | 3.5<br>(1.4–6.7)   | 6.4<br>(3.6–13.5)  | 7.9<br>(4.7–15.5)  | 8.9<br>(4.9–13.3)           | 8.9<br>(5.1–13.3)  | 3.6<br>(1.2–7.0)  | 3.6<br>(1.2–7.0)  | 2.4<br>(1.0–4.4)   | 2.4<br>(1.0–4.4)   | 0.2<br>(<0.1–3.3)  | 0.2<br>(<0.1–3.3)  |
| Rwanda                      | 50.6<br>(30.0–64.9) | 52.4<br>(32.1–68.1) | 12.1<br>(0.6–32.1) | 14.7<br>(1.3–37.3) | 39.9<br>(25.4–54.4)     | 39.9<br>(25.6–54.4) | 12.9<br>(8.5–18.2)  | 10.7<br>(6.5–16.2)  | 23.2<br>(10.7–34.0) | 23.2<br>(10.7–34.0) | 11.2<br>(7.4–15.3)  | 11.3<br>(6.9–16.8)  | 8.8<br>(3.9–16.4)          | 8.9<br>(3.9–16.4)  | 5.8<br>(3.2–11.8)  | 6.6<br>(3.8–13.1)  | 1.7<br>(0.9–2.7)            | 1.6<br>(0.8–2.5)   | 4.1<br>(2.0–6.5)  | 4.2<br>(2.1–6.6)  | <0.1<br>(<0.1–0.1) | <0.1<br>(<0.1–0.1) | 2.0<br>(<0.1–7.5)  | 2.0<br>(<0.1–7.5)  |
| Somalia                     | 63.8<br>(47.7–75.2) | 66.5<br>(49.0–77.9) | 12.7<br>(1.1–32.8) | 11.4<br>(0.8–31.2) | 60.3<br>(46.2–83.5)     | 60.3<br>(46.2–83.5) | 9.0<br>(5.7–13.1)   | 12.4<br>(7.3–19.8)  | 22.7<br>(10.5–33.4) | 22.7<br>(10.5–33.4) | 11.9<br>(7.6–17.7)  | 10.3<br>(6.0–16.5)  | 1.6<br>(0.3–5.0)           | 1.6<br>(0.3–5.0)   | 13.1<br>(8.2–23.9) | 12.4<br>(7.6–23.0) | 10.0<br>(3.7–16.9)          | 10.3<br>(3.8–18.3) | 3.5<br>(1.5–6.3)  | 3.4<br>(1.4–6.0)  | 2.3<br>(<0.1–15.8) | 2.3<br>(<0.1–15.8) | 0.1<br>(<0.1–1.3)  | 0.1<br>(<0.1–1.3)  |
| South Sudan                 | 64.5<br>(48.2–76.3) | 66.3<br>(48.5–77.7) | 12.9<br>(1.2–32.8) | 12.6<br>(1.3–32.4) | 44.4<br>(28.9–57.3)     | 44.4<br>(28.7–57.3) | 14.5<br>(9.1–21.7)  | 12.8<br>(8.2–19.3)  | 22.9<br>(10.6–33.6) | 22.9<br>(10.6–33.6) | 10.7<br>(6.5–16.0)  | 10.3<br>(6.4–15.3)  | 7.7<br>(3.5–14.1)          | 7.7<br>(3.6–14.1)  | 12.8<br>(8.4–22.9) | 12.1<br>(7.7–22.4) | 7.2<br>(3.5–11.7)           | 7.2<br>(3.4–11.8)  | 3.7<br>(1.5–6.3)  | 3.7<br>(1.6–6.3)  | 5.9<br>(<0.1–23.1) | 5.9<br>(<0.1–23.1) | <0.1<br>(<0.1–0.9) | <0.1<br>(<0.1–0.9) |
| Uganda                      | 51.6<br>(29.8–67.1) | 49.9<br>(28.2–65.5) | 11.2<br>(0.6–30.2) | 10.4<br>(0.6–28.9) | 42.1<br>(27.3–55.4)     | 42.2<br>(27.0–55.3) | 14.9<br>(8.5–23.5)  | 15.3<br>(8.7–23.9)  | 22.1<br>(10.1–32.5) | 22.1<br>(10.1–32.5) | 11.7<br>(6.7–18.9)  | 13.6<br>(7.7–21.1)  | 8.0<br>(3.9–13.2)          | 8.0<br>(3.9–13.1)  | 6.6<br>(3.7–13.6)  | 6.5<br>(3.6–13.3)  | 4.2<br>(2.2–6.8)            | 4.3<br>(2.4–6.9)   | 3.3<br>(1.3–5.8)  | 3.3<br>(1.4–5.8)  | 1.1<br>(0.2–2.9)   | 1.1<br>(0.2–2.9)   | <0.1<br>(<0.1–2.3) | <0.1<br>(<0.1–2.3) |
| United Republic of Tanzania | 51.7<br>(30.9–66.1) | 55.6<br>(32.9–70.6) | 13.6<br>(1.3–34.7) | 14.0<br>(1.0–36.7) | 41.6<br>(26.2–55.7)     | 41.6<br>(26.5–55.7) | 15.1<br>(9.6–22.7)  | 11.7<br>(7.3–18.0)  | 22.5<br>(10.4–33.2) | 22.5<br>(10.4–33.2) | 11.5<br>(7.1–17.2)  | 10.0<br>(6.2–15.6)  | 6.2<br>(3.3–10.1)          | 6.3<br>(3.3–10.2)  | 7.2<br>(4.2–14.4)  | 7.5<br>(4.5–14.9)  | 5.6<br>(3.1–8.6)            | 5.7<br>(3.2–8.7)   | 6.2<br>(2.9–10.0) | 6.2<br>(3.0–9.9)  | 0.9<br>(0.1–2.7)   | 0.9<br>(0.1–2.7)   | 0.1<br>(<0.1–3.5)  | 0.1<br>(<0.1–3.5)  |
| Zambia                      | 52.8<br>(32.1–66.6) | 52.9<br>(31.2–67.7) | 14.6<br>(1.3–37.2) | 15.0<br>(1.2–38.3) | 28.6<br>(16.8–43.0)     | 28.6<br>(16.8–43.0) | 16.3<br>(11.2–23.0) | 13.8<br>(8.6–20.0)  | 21.3<br>(9.7–31.5)  | 21.3<br>(9.7–31.5)  | 13.7<br>(9.4–19.3)  | 12.6<br>(7.9–18.6)  | 8.8<br>(5.1–13.9)          | 8.8<br>(5.2–14.0)  | 6.9<br>(4.1–13.8)  | 6.8<br>(3.9–13.6)  | 5.4<br>(3.0–8.3)            | 5.8<br>(3.5–8.6)   | 4.6<br>(1.4–9.0)  | 4.5<br>(1.4–8.8)  | 1.2<br>(0.3–3.5)   | 1.2<br>(0.3–3.5)   | <0.1<br>(<0.1–5.0) | <0.1<br>(<0.1–5.0) |
| Southern Sub-Saharan Africa | 50.0<br>(29.4–62.8) | 54.7<br>(34.3–67.2) | 9.8<br>(0.5–27.0)  | 10.6<br>(0.6–29.3) | 17.1<br>(9.9–26.2)      | 17.1<br>(9.8–26.2)  | 18.1<br>(15.1–21.7) | 15.2<br>(12.5–18.6) | 18.4<br>(8.3–27.3)  | 18.3<br>(8.3–27.1)  | 16.9<br>(14.1–20.3) | 15.1<br>(12.4–18.6) | 10.5<br>(7.0–15.1)         | 10.4<br>(6.9–15.1) | 5.3<br>(3.2–10.7)  | 5.4<br>(3.2–11.2)  | 9.4<br>(6.0–13.4)           | 9.8<br>(6.4–13.8)  | 7.4<br>(3.9–11.3) | 7.6<br>(4.0–11.7) | 1.3<br>(0.6–2.7)   | 1.3<br>(0.6–2.8)   | 5.2<br>(2.0–8.3)   | 5.1<br>(2.0–8.2)   |

|                            | Child wasting       |                     | Child stunting     |                    | Household air pollution |                     | Low birth weight    |                     | Handwashing         |                     | Short gestation     |                     | Ambient particulate matter |                     | Child underweight  |                    | Non-exclusive breastfeeding |                    | Secondhand smoke   |                    | High temperature    |                     | Low temperature     |                     |
|----------------------------|---------------------|---------------------|--------------------|--------------------|-------------------------|---------------------|---------------------|---------------------|---------------------|---------------------|---------------------|---------------------|----------------------------|---------------------|--------------------|--------------------|-----------------------------|--------------------|--------------------|--------------------|---------------------|---------------------|---------------------|---------------------|
|                            | M                   | F                   | M                  | F                  | M                       | F                   | M                   | F                   | M                   | F                   | M                   | F                   | M                          | F                   | M                  | F                  | M                           | F                  | M                  | F                  | M                   | F                   | M                   | F                   |
| Botswana                   | 54.6<br>(31.9–69.3) | 58.7<br>(37.5–73.5) | 13.1<br>(0.9–34.4) | 12.4<br>(0.8–33.8) | 8.9<br>(3.8–16.7)       | 8.8<br>(3.7–16.7)   | 14.3<br>(8.9–21.5)  | 11.8<br>(6.4–20.4)  | 17.0<br>(7.5–25.6)  | 17.0<br>(7.5–25.6)  | 14.0<br>(8.8–21.2)  | 12.4<br>(6.6–21.8)  | 12.1<br>(7.4–18.0)         | 12.1<br>(7.5–18.1)  | 4.8<br>(2.4–10.3)  | 5.8<br>(3.4–12.0)  | 6.8<br>(3.6–10.5)           | 6.5<br>(3.1–10.9)  | 8.8<br>(4.3–14.1)  | 8.9<br>(4.4–14.2)  | 4.0<br>(1.5–7.7)    | 4.0<br>(1.5–7.7)    | 0.9<br>(<0.1–7.0)   | 0.9<br>(<0.1–7.0)   |
| Eswatini                   | 46.3<br>(22.4–63.3) | 38.1<br>(16.5–56.2) | 9.0<br>(0.3–27.0)  | 12.3<br>(0.8–33.9) | 15.7<br>(7.4–27.0)      | 15.7<br>(7.5–27.0)  | 8.4<br>(4.5–13.9)   | 10.8<br>(6.0–18.8)  | 16.5<br>(7.4–25.0)  | 16.5<br>(7.4–25.0)  | 8.3<br>(4.5–13.8)   | 11.0<br>(6.1–19.3)  | 10.2<br>(6.2–15.7)         | 10.2<br>(6.2–15.4)  | 4.4<br>(2.5–9.5)   | 4.4<br>(2.4–9.4)   | 9.0<br>(5.4–12.9)           | 9.6<br>(5.8–13.8)  | 2.4<br>(0.9–4.6)   | 2.5<br>(0.9–4.4)   | 0.4<br>(<0.1–1.2)   | 0.4<br>(<0.1–1.2)   | 3.3<br>(<0.1–8.1)   | 3.3<br>(<0.1–8.1)   |
| Lesotho                    | 58.2<br>(38.1–73.0) | 54.7<br>(33.5–70.6) | 10.1<br>(0.4–29.0) | 12.8<br>(0.8–34.0) | 22.0<br>(12.3–34.1)     | 22.0<br>(12.3–34.2) | 14.9<br>(8.4–23.1)  | 16.3<br>(8.7–27.0)  | 23.1<br>(10.7–33.9) | 23.1<br>(10.7–33.9) | 13.6<br>(7.6–21.0)  | 16.1<br>(8.6–26.7)  | 10.4<br>(6.2–16.1)         | 10.3<br>(6.2–16.0)  | 5.6<br>(3.1–11.7)  | 7.6<br>(4.5–15.0)  | 6.3<br>(3.5–9.7)            | 6.1<br>(3.2–9.5)   | 10.6<br>(6.1–15.6) | 10.6<br>(6.0–15.4) | <0.1<br>(<0.1–<0.1) | <0.1<br>(<0.1–<0.1) | 21.7<br>(15.2–28.4) | 21.7<br>(15.2–28.4) |
| Namibia                    | 56.7<br>(35.3–70.7) | 61.8<br>(39.7–75.9) | 7.7<br>(0.2–22.7)  | 9.1<br>(0.2–27.2)  | 12.0<br>(5.6–21.6)      | 12.0<br>(5.4–21.6)  | 16.3<br>(10.2–24.8) | 12.8<br>(6.8–22.7)  | 14.3<br>(6.2–22.0)  | 14.3<br>(6.2–22.0)  | 15.1<br>(9.3–22.9)  | 12.4<br>(6.6–21.9)  | 11.1<br>(6.4–17.0)         | 11.1<br>(6.3–17.1)  | 5.3<br>(2.7–11.2)  | 7.3<br>(4.3–14.8)  | 7.9<br>(4.6–11.8)           | 8.7<br>(5.1–13.2)  | 4.5<br>(1.7–8.1)   | 4.6<br>(1.8–8.2)   | 3.2<br>(1.3–6.0)    | 3.2<br>(1.3–6.0)    | 1.3<br>(<0.1–6.0)   | 1.3<br>(<0.1–6.0)   |
| South Africa               | 52.3<br>(32.6–64.2) | 62.2<br>(43.0–72.3) | 11.1<br>(0.8–29.4) | 10.4<br>(0.5–30.3) | 3.7<br>(1.6–7.0)        | 3.5<br>(1.5–6.8)    | 18.7<br>(16.2–21.6) | 14.2<br>(12.1–16.8) | 15.3<br>(6.7–23.2)  | 15.1<br>(6.7–23.0)  | 18.1<br>(15.6–20.7) | 14.4<br>(12.2–17.1) | 14.3<br>(9.7–20.4)         | 14.2<br>(9.3–20.5)  | 5.7<br>(3.4–11.2)  | 5.2<br>(3.1–10.5)  | 11.0<br>(7.5–15.0)          | 12.2<br>(8.4–16.6) | 7.3<br>(3.4–11.8)  | 7.6<br>(3.6–12.3)  | 0.8<br>(0.4–2.1)    | 0.8<br>(0.3–2.1)    | 8.6<br>(6.3–11.1)   | 8.8<br>(6.5–11.2)   |
| Zimbabwe                   | 46.4<br>(25.9–61.5) | 48.3<br>(26.2–63.0) | 8.6<br>(0.3–25.0)  | 10.3<br>(0.7–28.4) | 29.1<br>(17.5–43.3)     | 29.1<br>(17.4–43.3) | 18.9<br>(12.8–26.3) | 16.7<br>(11.4–23.3) | 20.9<br>(9.6–31.0)  | 20.9<br>(9.6–31.0)  | 17.2<br>(11.6–24.1) | 16.4<br>(11.2–22.9) | 7.1<br>(4.1–11.1)          | 7.1<br>(4.1–11.1)   | 5.0<br>(2.8–10.4)  | 5.3<br>(3.0–11.0)  | 8.6<br>(5.0–13.0)           | 8.3<br>(4.8–12.4)  | 7.5<br>(4.1–11.2)  | 7.6<br>(4.2–11.4)  | 1.7<br>(0.7–3.8)    | 1.7<br>(0.7–3.8)    | 0.7<br>(<0.1–5.1)   | 0.7<br>(<0.1–5.1)   |
| Western Sub-Saharan Africa | 58.0<br>(42.6–66.9) | 62.0<br>(45.6–70.8) | 13.4<br>(1.4–32.5) | 14.9<br>(1.6–35.6) | 40.9<br>(28.7–53.5)     | 41.2<br>(29.1–53.7) | 18.8<br>(16.5–21.6) | 15.5<br>(13.4–18.1) | 22.1<br>(10.1–32.4) | 22.0<br>(10.1–32.4) | 14.7<br>(12.9–16.9) | 13.3<br>(11.4–15.5) | 11.8<br>(6.3–19.6)         | 11.7<br>(6.2–19.6)  | 12.3<br>(8.1–21.6) | 13.0<br>(8.6–23.1) | 7.9<br>(3.9–12.4)           | 7.9<br>(3.9–12.4)  | 3.4<br>(1.8–5.3)   | 3.5<br>(1.8–5.4)   | 8.3<br>(1.3–28.7)   | 8.2<br>(1.1–28.5)   | 1.1<br>(<0.1–4.4)   | 1.1<br>(<0.1–4.5)   |
| Benin                      | 60.3<br>(41.7–74.2) | 63.7<br>(45.9–75.8) | 15.2<br>(1.6–37.4) | 17.4<br>(1.8–41.4) | 42.0<br>(27.6–54.9)     | 42.0<br>(27.6–55.0) | 14.7<br>(8.4–23.0)  | 13.6<br>(8.2–20.8)  | 22.1<br>(10.1–32.6) | 22.1<br>(10.1–32.6) | 10.9<br>(6.1–17.1)  | 11.1<br>(6.7–16.8)  | 9.5<br>(4.3–16.4)          | 9.5<br>(4.3–16.3)   | 9.1<br>(5.6–17.5)  | 10.3<br>(6.4–19.3) | 6.0<br>(2.8–9.6)            | 6.2<br>(3.0–10.3)  | 3.6<br>(1.7–5.7)   | 3.7<br>(1.8–6.0)   | 3.3<br>(<0.1–18.5)  | 3.3<br>(<0.1–18.5)  | <0.1<br>(<0.1–1.2)  | <0.1<br>(<0.1–1.2)  |
| Burkina Faso               | 65.8<br>(50.5–76.2) | 69.3<br>(53.4–79.0) | 12.2<br>(0.9–32.8) | 13.5<br>(1.1–34.9) | 49.4<br>(36.1–63.0)     | 49.4<br>(35.9–63.0) | 16.7<br>(10.6–25.0) | 12.6<br>(8.2–18.8)  | 22.2<br>(10.2–32.7) | 22.2<br>(10.2–32.7) | 12.9<br>(8.0–19.3)  | 10.5<br>(6.7–15.7)  | 6.7<br>(2.1–14.2)          | 6.7<br>(2.1–14.4)   | 11.2<br>(7.1–20.8) | 13.1<br>(8.4–23.9) | 7.1<br>(2.5–12.4)           | 6.7<br>(2.4–12.0)  | 3.8<br>(1.5–6.7)   | 3.9<br>(1.6–6.8)   | 4.6<br>(<0.1–34.1)  | 4.6<br>(<0.1–34.1)  | <0.1<br>(<0.1–3.1)  | <0.1<br>(<0.1–3.1)  |
| Cabo Verde                 | 52.9<br>(30.1–69.0) | 54.2<br>(31.6–68.7) | 5.2<br>(0.0–17.1)  | 5.4<br>(0.0–18.2)  | 7.3<br>(3.5–13.3)       | 7.3<br>(3.4–13.3)   | 16.5<br>(9.5–30.6)  | 14.7<br>(8.8–25.4)  | 19.0<br>(8.5–28.3)  | 19.0<br>(8.5–28.3)  | 14.7<br>(8.4–26.7)  | 14.1<br>(8.5–24.3)  | 21.3<br>(13.4–31.1)        | 21.3<br>(13.4–31.1) | 3.7<br>(1.7–8.0)   | 4.1<br>(2.0–9.0)   | 8.0<br>(4.7–12.0)           | 8.2<br>(4.8–11.8)  | 3.9<br>(1.8–6.5)   | 3.9<br>(1.8–6.4)   | 0.2<br>(<0.1–1.1)   | 0.2<br>(<0.1–1.1)   | <0.1<br>(<0.1–6.3)  | <0.1<br>(<0.1–6.3)  |
| Cameroon                   | 51.3<br>(31.1–67.0) | 53.8<br>(32.7–69.9) | 10.3<br>(0.6–27.6) | 11.7<br>(1.0–31.7) | 23.8<br>(13.5–35.7)     | 23.8<br>(13.7–35.9) | 16.5<br>(9.6–25.9)  | 13.2<br>(6.8–22.1)  | 21.8<br>(10.0–32.1) | 21.8<br>(10.0–32.1) | 14.2<br>(8.1–22.5)  | 13.5<br>(7.0–22.9)  | 18.9<br>(11.8–27.2)        | 19.0<br>(11.9–27.1) | 5.2<br>(2.9–10.9)  | 7.4<br>(4.4–15.0)  | 7.9<br>(3.7–12.8)           | 7.8<br>(3.6–13.7)  | 3.8<br>(1.8–6.1)   | 3.9<br>(1.9–6.4)   | 2.0<br>(0.1–7.1)    | 2.0<br>(0.1–7.1)    | <0.1<br>(<0.1–1.6)  | <0.1<br>(<0.1–1.6)  |
| Chad                       | 62.5<br>(45.1–74.0) | 68.3<br>(51.2–80.2) | 12.0<br>(1.2–28.8) | 14.4<br>(1.5–36.3) | 50.2<br>(36.9–64.5)     | 50.2<br>(37.0–64.5) | 14.5<br>(9.6–21.5)  | 10.2<br>(5.3–17.1)  | 22.3<br>(10.2–32.8) | 22.3<br>(10.2–32.8) | 11.1<br>(7.2–16.6)  | 9.0<br>(4.8–15.0)   | 6.7<br>(2.3–14.9)          | 6.7<br>(2.3–15.1)   | 9.9<br>(6.1–19.1)  | 13.6<br>(8.7–24.8) | 9.3<br>(3.7–16.2)           | 8.8<br>(3.4–15.7)  | 4.7<br>(2.1–7.8)   | 4.7<br>(2.1–7.8)   | 7.0<br>(0.4–22.9)   | 7.0<br>(0.4–22.9)   | 1.3<br>(<0.1–7.7)   | 1.3<br>(<0.1–7.7)   |
| Côte d'Ivoire              | 46.5<br>(29.8–62.4) | 50.1<br>(32.0–64.4) | 9.0<br>(0.4–24.5)  | 10.4<br>(0.8–27.4) | 34.4<br>(21.5–48.1)     | 34.3<br>(21.5–48.1) | 28.7<br>(17.8–40.6) | 25.2<br>(15.7–37.1) | 20.8<br>(9.5–31.0)  | 20.8<br>(9.5–31.0)  | 22.8<br>(14.3–32.4) | 21.7<br>(13.5–32.1) | 13.2<br>(6.7–22.3)         | 13.3<br>(6.8–22.5)  | 5.8<br>(3.1–11.6)  | 6.7<br>(3.7–13.6)  | 6.9<br>(2.9–11.8)           | 6.9<br>(3.0–11.5)  | 6.8<br>(3.7–10.4)  | 6.8<br>(3.8–10.5)  | 1.6<br>(<0.1–5.7)   | 1.6<br>(<0.1–5.7)   | 0.2<br>(<0.1–1.2)   | 0.2<br>(<0.1–1.2)   |

|                       | Child wasting       |                     | Child stunting     |                    | Household air pollution |                     | Low birth weight    |                     | Handwashing         |                     | Short gestation     |                     | Ambient particulate matter |                     | Child underweight  |                     | Non-exclusive breastfeeding |                   | Secondhand smoke  |                   | High temperature   |                    | Low temperature    |                    |
|-----------------------|---------------------|---------------------|--------------------|--------------------|-------------------------|---------------------|---------------------|---------------------|---------------------|---------------------|---------------------|---------------------|----------------------------|---------------------|--------------------|---------------------|-----------------------------|-------------------|-------------------|-------------------|--------------------|--------------------|--------------------|--------------------|
|                       | M                   | F                   | M                  | F                  | M                       | F                   | M                   | F                   | M                   | F                   | M                   | F                   | M                          | F                   | M                  | F                   | M                           | F                 | M                 | F                 | M                  | F                  | M                  | F                  |
| Gambia                | 53.5<br>(36.8–66.5) | 52.9<br>(35.1–67.5) | 8.7<br>(0.6–25.0)  | 6.9<br>(0.1–21.4)  | 39.7<br>(25.7–52.7)     | 39.7<br>(25.8–52.7) | 24.5<br>(16.2–35.5) | 20.5<br>(12.7–29.7) | 21.9<br>(10.1–32.3) | 21.9<br>(10.1–32.3) | 18.8<br>(12.4–27.1) | 18.8<br>(11.7–27.4) | 11.9<br>(5.9–19.8)         | 12.0<br>(5.9–20.0)  | 10.3<br>(6.4–18.9) | 5.6<br>(2.9–11.7)   | 4.9<br>(2.5–8.1)            | 4.8<br>(2.4–7.8)  | 7.4<br>(3.8–11.2) | 7.4<br>(3.9–11.2) | 2.2<br>(<0.1–20.9) | 2.2<br>(<0.1–20.9) | 0.1<br>(<0.1–1.5)  | 0.1<br>(<0.1–1.5)  |
| Ghana                 | 54.4<br>(35.6–69.1) | 56.2<br>(37.7–71.2) | 7.0<br>(0.1–21.9)  | 7.3<br>(0.2–22.9)  | 18.0<br>(9.5–29.9)      | 18.0<br>(9.3–29.9)  | 17.6<br>(10.4–27.2) | 15.9<br>(9.2–25.4)  | 22.3<br>(10.3–32.8) | 22.3<br>(10.3–32.8) | 13.1<br>(7.8–20.4)  | 13.9<br>(7.8–22.1)  | 18.8<br>(12.0–28.5)        | 18.8<br>(11.8–28.4) | 6.7<br>(3.9–13.1)  | 6.5<br>(3.4–12.7)   | 5.4<br>(2.7–8.8)            | 5.8<br>(2.9–9.4)  | 2.1<br>(1.0–3.5)  | 2.1<br>(1.0–3.5)  | 2.9<br>(<0.1–18.5) | 2.9<br>(<0.1–18.5) | <0.1<br>(<0.1–0.7) | <0.1<br>(<0.1–0.7) |
| Guinea                | 58.9<br>(38.2–72.9) | 61.4<br>(40.8–74.3) | 12.3<br>(0.8–31.8) | 12.8<br>(0.7–33.0) | 47.1<br>(32.7–59.1)     | 47.1<br>(32.7–59.1) | 13.5<br>(7.8–20.4)  | 11.5<br>(6.9–17.8)  | 22.3<br>(10.3–32.8) | 22.3<br>(10.3–32.8) | 10.1<br>(5.8–15.5)  | 9.8<br>(5.9–15.2)   | 8.1<br>(3.2–15.9)          | 8.1<br>(3.2–15.7)   | 9.2<br>(5.7–18.2)  | 9.8<br>(6.0–18.6)   | 7.5<br>(3.2–13.0)           | 6.8<br>(2.9–11.9) | 5.1<br>(2.6–8.1)  | 5.0<br>(2.6–7.8)  | 2.7<br>(0.7–7.1)   | 2.7<br>(0.7–7.1)   | 0.1<br>(<0.1–1.3)  | 0.1<br>(<0.1–1.3)  |
| Guinea-Bissau         | 49.8<br>(30.9–65.7) | 55.4<br>(36.6–69.9) | 10.1<br>(0.6–26.3) | 11.6<br>(0.6–32.5) | 45.1<br>(31.0–57.4)     | 45.0<br>(30.9–57.4) | 25.0<br>(14.4–38.8) | 19.8<br>(11.4–32.1) | 22.3<br>(10.3–32.8) | 22.3<br>(10.3–32.8) | 19.4<br>(11.2–30.2) | 16.8<br>(9.6–27.3)  | 9.1<br>(3.9–16.7)          | 9.2<br>(4.0–16.6)   | 6.5<br>(3.5–13.0)  | 8.7<br>(5.2–16.7)   | 5.1<br>(1.9–9.1)            | 5.0<br>(1.9–9.0)  | 4.8<br>(2.5–7.8)  | 4.7<br>(2.3–7.5)  | 2.2<br>(<0.1–22.7) | 2.2<br>(<0.1–22.7) | <0.1<br>(<0.1–1.3) | <0.1<br>(<0.1–1.3) |
| Liberia               | 50.5<br>(30.8–66.4) | 54.2<br>(33.1–69.2) | 9.0<br>(0.6–25.3)  | 10.1<br>(0.6–27.0) | 42.8<br>(28.6–55.1)     | 42.8<br>(28.6–55.0) | 22.6<br>(13.5–33.4) | 18.7<br>(10.7–28.8) | 23.3<br>(10.8–34.1) | 23.3<br>(10.8–34.1) | 18.2<br>(10.8–27.0) | 16.1<br>(9.1–25.1)  | 9.7<br>(4.5–17.1)          | 9.7<br>(4.5–17.0)   | 4.8<br>(2.6–9.8)   | 8.8<br>(5.4–16.6)   | 5.9<br>(3.1–9.2)            | 6.0<br>(3.1–9.6)  | 2.6<br>(1.1–4.5)  | 2.7<br>(1.1–4.6)  | 0.9<br>(<0.1–3.3)  | 0.9<br>(<0.1–3.3)  | 0.1<br>(<0.1–2.0)  | 0.1<br>(<0.1–2.0)  |
| Mali                  | 66.8<br>(48.5–78.8) | 68.3<br>(48.2–79.0) | 12.2<br>(0.9–32.7) | 10.2<br>(0.4–29.1) | 49.7<br>(35.8–63.4)     | 49.7<br>(35.7–63.4) | 12.7<br>(7.6–19.6)  | 10.9<br>(6.8–15.7)  | 21.9<br>(10.1–32.3) | 21.9<br>(10.1–32.3) | 9.9<br>(5.9–15.5)   | 8.8<br>(5.4–12.7)   | 7.2<br>(2.4–15.6)          | 7.2<br>(2.4–15.6)   | 11.1<br>(7.1–21.0) | 9.0<br>(5.4–17.8)   | 5.6<br>(2.4–9.5)            | 7.3<br>(3.3–12.4) | 3.9<br>(1.7–6.5)  | 3.8<br>(1.7–6.5)  | 7.3<br>(<0.1–26.7) | 7.3<br>(<0.1–26.7) | 1.3<br>(<0.1–13.3) | 1.3<br>(<0.1–13.3) |
| Mauritania            | 40.4<br>(23.5–58.8) | 41.9<br>(25.5–58.2) | 5.8<br>(0.3–17.0)  | 5.7<br>(0.3–16.7)  | 19.1<br>(10.3–30.5)     | 19.1<br>(10.3–30.5) | 35.7<br>(21.5–49.3) | 32.9<br>(21.0–44.8) | 19.6<br>(8.8–29.2)  | 19.6<br>(8.8–29.2)  | 29.3<br>(17.6–41.1) | 30.1<br>(19.0–41.5) | 20.5<br>(11.6–31.5)        | 20.6<br>(11.6–31.5) | 5.7<br>(2.9–11.7)  | 5.7<br>(2.9–11.3)   | 6.9<br>(3.2–11.9)           | 7.5<br>(3.6–12.5) | 4.2<br>(1.9–6.9)  | 4.1<br>(1.8–7.0)  | 8.0<br>(1.7–19.5)  | 8.0<br>(1.7–19.5)  | 1.9<br>(<0.1–13.0) | 1.9<br>(<0.1–13.0) |
| Niger                 | 62.6<br>(46.2–74.3) | 68.4<br>(50.9–79.2) | 16.5<br>(1.7–38.7) | 19.1<br>(2.3–43.4) | 53.8<br>(38.7–73.9)     | 53.7<br>(38.5–73.9) | 18.6<br>(12.0–27.3) | 13.9<br>(8.5–21.4)  | 21.4<br>(9.8–31.7)  | 21.4<br>(9.8–31.7)  | 14.9<br>(9.6–21.6)  | 11.6<br>(7.1–17.8)  | 5.9<br>(1.5–15.4)          | 6.0<br>(1.5–15.6)   | 15.2<br>(9.8–26.6) | 18.0<br>(11.8–30.6) | 7.0<br>(2.7–12.3)           | 7.0<br>(2.6–12.7) | 3.8<br>(1.8–6.0)  | 3.7<br>(1.8–5.9)  | 8.4<br>(0.5–23.3)  | 8.4<br>(0.5–23.3)  | 1.6<br>(<0.1–11.5) | 1.6<br>(<0.1–11.5) |
| Nigeria               | 56.3<br>(41.6–64.4) | 60.5<br>(45.0–68.7) | 14.2<br>(1.8–32.8) | 16.1<br>(1.9–36.8) | 38.2<br>(26.2–50.9)     | 38.5<br>(26.6–51.0) | 20.1<br>(17.9–23.1) | 17.0<br>(14.8–19.8) | 22.2<br>(10.2–32.6) | 22.2<br>(10.2–32.7) | 15.7<br>(13.9–18.1) | 14.6<br>(12.7–17.1) | 13.8<br>(7.3–22.8)         | 13.7<br>(7.3–23.0)  | 14.1<br>(9.4–24.0) | 14.2<br>(9.4–24.4)  | 8.4<br>(4.5–12.9)           | 8.5<br>(4.4–13.0) | 2.7<br>(1.5–4.1)  | 2.8<br>(1.5–4.2)  | 10.8<br>(2.2–43.0) | 10.9<br>(2.2–43.1) | 1.5<br>(<0.1–4.1)  | 1.5<br>(<0.1–4.1)  |
| Sao Tome and Principe | 50.3<br>(33.1–64.7) | 56.0<br>(37.2–69.0) | 10.1<br>(0.8–28.4) | 10.8<br>(0.8–30.0) | 21.5<br>(11.6–33.8)     | 21.4<br>(11.3–33.8) | 23.3<br>(15.1–33.5) | 19.5<br>(11.9–28.3) | 17.4<br>(7.7–26.1)  | 17.4<br>(7.7–26.1)  | 19.6<br>(12.5–28.3) | 17.1<br>(10.4–24.9) | 11.3<br>(6.1–18.3)         | 11.3<br>(6.0–18.4)  | 4.2<br>(2.2–8.9)   | 6.6<br>(4.0–12.7)   | 5.4<br>(2.9–8.6)            | 5.6<br>(3.1–8.8)  | 1.3<br>(0.6–2.1)  | 1.4<br>(0.6–2.2)  | 0.9<br>(<0.1–3.7)  | 0.9<br>(<0.1–3.7)  | <0.1<br>(<0.1–1.9) | <0.1<br>(<0.1–1.9) |
| Senegal               | 46.8<br>(28.0–62.3) | 47.4<br>(28.9–62.7) | 5.5<br>(0.1–17.0)  | 6.9<br>(0.3–21.4)  | 36.7<br>(23.5–49.1)     | 36.7<br>(23.2–48.8) | 26.6<br>(17.1–39.2) | 26.0<br>(15.9–39.1) | 18.8<br>(8.4–28.1)  | 18.8<br>(8.4–28.1)  | 21.4<br>(13.7–31.5) | 22.3<br>(13.5–33.7) | 12.7<br>(6.3–21.1)         | 12.7<br>(6.3–21.1)  | 5.2<br>(2.8–10.8)  | 6.1<br>(3.3–12.2)   | 7.8<br>(3.0–13.4)           | 7.6<br>(2.9–13.4) | 7.6<br>(4.3–11.2) | 7.6<br>(4.3–11.3) | 4.2<br>(<0.1–30.1) | 4.2<br>(<0.1–30.1) | 0.1<br>(<0.1–2.2)  | 0.1<br>(<0.1–2.2)  |
| Sierra Leone          | 66.8<br>(46.0–79.3) | 66.9<br>(46.1–79.4) | 13.6<br>(0.8–36.3) | 15.9<br>(1.4–39.8) | 45.5<br>(31.1–58.0)     | 45.5<br>(31.0–58.0) | 9.1<br>(5.4–14.1)   | 8.9<br>(5.0–14.1)   | 22.2<br>(10.2–32.6) | 22.2<br>(10.2–32.6) | 7.0<br>(4.2–10.9)   | 7.4<br>(4.1–11.8)   | 8.7<br>(3.7–16.4)          | 8.7<br>(3.8–16.5)   | 9.0<br>(5.5–17.9)  | 10.7<br>(6.8–20.6)  | 7.7<br>(4.2–12.0)           | 7.5<br>(3.9–11.9) | 5.5<br>(2.2–10.1) | 5.5<br>(2.1–9.8)  | 1.8<br>(<0.1–4.3)  | 1.8<br>(<0.1–4.3)  | 0.2<br>(<0.1–1.5)  | 0.2<br>(<0.1–1.5)  |
| Togo                  | 46.9<br>(28.4–64.2) | 51.0<br>(31.5–66.7) | 7.9<br>(0.4–23.8)  | 8.6<br>(0.3–25.4)  | 37.4<br>(23.7–50.8)     | 37.3<br>(23.6–50.8) | 25.6<br>(14.2–39.1) | 19.4<br>(11.0–30.4) | 22.0<br>(10.1–32.5) | 22.0<br>(10.1–32.5) | 20.4<br>(11.3–31.6) | 17.2<br>(9.7–26.9)  | 11.0<br>(6.0–17.6)         | 11.1<br>(6.1–18.1)  | 6.2<br>(3.3–13.0)  | 7.0<br>(3.8–13.9)   | 4.8<br>(2.3–8.2)            | 5.1<br>(2.5–8.4)  | 5.0<br>(2.8–7.4)  | 5.1<br>(2.9–7.6)  | 2.7<br>(<0.1–13.0) | 2.7<br>(<0.1–13.0) | 0.1<br>(<0.1–0.9)  | 0.1<br>(<0.1–0.9)  |

Appendix Table 8. Population-attributable fractions of lower respiratory infections due to evaluated risk factors among children aged 5-14 years in 2019, males (M) and females (F) (95% UI)

|                                                         | Household air pollution    |                            | Handwashing               |                           | Ambient particulate matter |                            | Secondhand smoke          |                           | High temperature         |                          | Low temperature            |                            |
|---------------------------------------------------------|----------------------------|----------------------------|---------------------------|---------------------------|----------------------------|----------------------------|---------------------------|---------------------------|--------------------------|--------------------------|----------------------------|----------------------------|
|                                                         | M                          | F                          | M                         | F                         | M                          | F                          | M                         | F                         | M                        | F                        | M                          | F                          |
| <b>Global</b>                                           | <b>26.0</b><br>(16.6–35.5) | <b>25.8</b><br>(16.3–35.4) | <b>15.1</b><br>(6.7–22.7) | <b>15.1</b><br>(6.7–22.7) | <b>14.4</b><br>(10.0–19.7) | <b>15.3</b><br>(10.7–20.8) | <b>7.9</b><br>(4.5–11.5)  | <b>8.1</b><br>(4.6–11.9)  | <b>4.8</b><br>(2.3–10.1) | <b>4.9</b><br>(2.4–9.9)  | <b>3.3</b><br>(0.5–6.2)    | <b>3.0</b><br>(0.1–6.0)    |
| <b>Central Europe, Eastern Europe, and Central Asia</b> | <b>2.7</b><br>(1.0–5.4)    | <b>2.5</b><br>(0.9–5.1)    | <b>4.2</b><br>(1.7–6.8)   | <b>4.1</b><br>(1.7–6.8)   | <b>13.9</b><br>(7.7–21.9)  | <b>13.6</b><br>(7.5–21.2)  | <b>13.3</b><br>(8.4–18.4) | <b>13.8</b><br>(8.7–18.9) | <b>0.7</b><br>(<0.1–1.7) | <b>0.7</b><br>(<0.1–1.7) | <b>18.2</b><br>(13.1–24.4) | <b>18.2</b><br>(13.0–24.1) |
| Central Asia                                            | 3.2<br>(1.3–6.4)           | 3.0<br>(1.1–6.3)           | 4.8<br>(1.9–7.7)          | 4.7<br>(1.9–7.7)          | 15.7<br>(8.3–25.3)         | 15.6<br>(8.2–25.1)         | 12.0<br>(7.5–16.8)        | 12.3<br>(7.8–17.0)        | 0.9<br>(<0.1–2.1)        | 0.9<br>(<0.1–2.1)        | 18.1<br>(13.5–23.4)        | 18.1<br>(13.5–23.0)        |
| Armenia                                                 | 0.5<br>(0.1–1.1)           | 0.5<br>(0.1–1.1)           | 3.8<br>(1.5–6.2)          | 3.8<br>(1.5–6.2)          | 16.8<br>(9.1–27.0)         | 16.8<br>(9.1–27.0)         | 21.6<br>(14.4–28.2)       | 21.2<br>(14.2–28.1)       | <0.1<br>(<0.1–0.2)       | <0.1<br>(<0.1–0.2)       | 18.4<br>(8.4–31.6)         | 18.4<br>(8.4–31.6)         |
| Azerbaijan                                              | 1.2<br>(0.4–3.0)           | 1.2<br>(0.4–3.0)           | 3.5<br>(1.4–5.7)          | 3.5<br>(1.4–5.7)          | 12.9<br>(6.1–22.5)         | 12.9<br>(6.1–22.5)         | 20.1<br>(13.3–27.4)       | 20.1<br>(13.5–27.6)       | 0.5<br>(<0.1–1.1)        | 0.5<br>(<0.1–1.1)        | 15.7<br>(12.6–19.1)        | 15.7<br>(12.6–19.1)        |

|                        | Household air pollution |                    | Handwashing       |                   | Ambient particulate matter |                     | Secondhand smoke    |                     | High temperature    |                     | Low temperature     |                     |
|------------------------|-------------------------|--------------------|-------------------|-------------------|----------------------------|---------------------|---------------------|---------------------|---------------------|---------------------|---------------------|---------------------|
|                        | M                       | F                  | M                 | F                 | M                          | F                   | M                   | F                   | M                   | F                   | M                   | F                   |
| Georgia                | 5.1<br>(1.5–11.8)       | 5.1<br>(1.5–11.8)  | 3.3<br>(1.3–5.4)  | 3.3<br>(1.3–5.4)  | 9.0<br>(5.3–14.1)          | 9.0<br>(5.3–14.1)   | 21.1<br>(14.2–28.3) | 21.1<br>(14.2–28.0) | <0.1<br>(<0.1–0.2)  | <0.1<br>(<0.1–0.2)  | 18.9<br>(11.2–29.0) | 18.9<br>(11.2–29.0) |
| Kazakhstan             | 1.6<br>(0.4–4.0)        | 1.6<br>(0.4–4.0)   | 3.4<br>(1.4–5.7)  | 3.4<br>(1.4–5.7)  | 10.3<br>(5.4–16.8)         | 10.3<br>(5.4–16.8)  | 15.6<br>(9.4–21.8)  | 15.7<br>(9.6–21.9)  | 0.5<br>(<0.1–2.0)   | 0.5<br>(<0.1–2.0)   | 18.4<br>(11.3–27.6) | 18.4<br>(11.3–27.6) |
| Kyrgyzstan             | 6.9<br>(2.7–13.7)       | 6.9<br>(2.7–13.7)  | 4.0<br>(1.6–6.5)  | 4.0<br>(1.6–6.5)  | 11.5<br>(6.2–18.7)         | 11.5<br>(6.2–18.7)  | 19.8<br>(13.3–26.5) | 19.7<br>(13.1–26.6) | <0.1<br>(<0.1–<0.1) | <0.1<br>(<0.1–<0.1) | 21.4<br>(8.4–37.4)  | 21.4<br>(8.4–37.4)  |
| Mongolia               | 8.4<br>(3.3–17.1)       | 8.4<br>(3.3–17.1)  | 8.5<br>(3.6–13.6) | 8.5<br>(3.6–13.6) | 16.8<br>(10.7–24.1)        | 16.8<br>(10.7–24.1) | 14.4<br>(8.6–20.7)  | 14.5<br>(8.4–20.6)  | 0.2<br>(<0.1–0.9)   | 0.2<br>(<0.1–0.9)   | 18.3<br>(3.6–34.9)  | 18.3<br>(3.6–34.9)  |
| Tajikistan             | 9.5<br>(4.1–18.0)       | 9.5<br>(4.1–18.0)  | 7.1<br>(2.9–11.3) | 7.1<br>(2.9–11.3) | 16.3<br>(7.9–27.9)         | 16.3<br>(7.9–27.9)  | 11.2<br>(6.6–16.4)  | 12.7<br>(8.1–17.8)  | 0.3<br>(0.1–0.5)    | 0.3<br>(0.1–0.5)    | 21.4<br>(9.3–34.9)  | 21.4<br>(9.3–34.9)  |
| Turkmenistan           | <0.1<br>(<0.1–0.1)      | <0.1<br>(<0.1–0.1) | 4.6<br>(1.9–7.4)  | 4.6<br>(1.9–7.4)  | 13.3<br>(6.3–23.0)         | 13.3<br>(6.3–23.0)  | 19.4<br>(12.7–26.7) | 19.9<br>(13.3–26.6) | 2.6<br>(0.9–4.3)    | 2.6<br>(0.9–4.3)    | 12.7<br>(10.0–15.4) | 12.7<br>(10.0–15.4) |
| Uzbekistan             | 2.1<br>(0.7–4.8)        | 2.1<br>(0.7–4.8)   | 4.5<br>(1.8–7.3)  | 4.5<br>(1.8–7.3)  | 16.8<br>(8.4–27.7)         | 16.8<br>(8.4–27.7)  | 9.2<br>(5.2–13.9)   | 9.4<br>(5.4–13.7)   | 1.0<br>(<0.1–2.7)   | 1.0<br>(<0.1–2.7)   | 18.0<br>(13.9–22.0) | 18.0<br>(13.9–22.0) |
| Central Europe         | 1.8<br>(0.5–4.2)        | 1.7<br>(0.5–4.0)   | 1.1<br>(0.5–1.9)  | 1.1<br>(0.4–1.9)  | 9.4<br>(5.8–14.1)          | 9.4<br>(5.8–14.1)   | 17.0<br>(10.9–23.7) | 17.1<br>(10.8–23.2) | <0.1<br>(<0.1–0.1)  | <0.1<br>(<0.1–0.1)  | 20.8<br>(15.0–27.7) | 20.8<br>(14.9–27.9) |
| Albania                | 4.9<br>(1.5–11.3)       | 4.9<br>(1.5–11.3)  | 1.7<br>(0.7–2.9)  | 1.7<br>(0.7–2.9)  | 9.4<br>(5.8–14.1)          | 9.4<br>(5.8–14.1)   | 19.6<br>(12.8–26.1) | 19.7<br>(13.0–26.5) | <0.1<br>(<0.1–0.1)  | <0.1<br>(<0.1–0.1)  | 19.2<br>(14.6–24.1) | 19.2<br>(14.6–24.1) |
| Bosnia and Herzegovina | 4.9<br>(1.6–11.0)       | 4.9<br>(1.6–11.0)  | 1.3<br>(0.5–2.1)  | 1.3<br>(0.5–2.1)  | 14.4<br>(9.3–20.3)         | 14.4<br>(9.3–20.3)  | 22.8<br>(15.3–30.2) | 22.6<br>(14.8–30.2) | <0.1<br>(<0.1–<0.1) | <0.1<br>(<0.1–<0.1) | 22.3<br>(15.8–29.9) | 22.3<br>(15.8–29.9) |
| Bulgaria               | 2.1<br>(0.6–5.2)        | 2.1<br>(0.6–5.2)   | 1.1<br>(0.4–1.8)  | 1.1<br>(0.4–1.8)  | 9.9<br>(6.2–14.8)          | 9.9<br>(6.2–14.8)   | 21.3<br>(13.8–28.7) | 21.2<br>(13.8–28.4) | <0.1<br>(<0.1–<0.1) | <0.1<br>(<0.1–<0.1) | 21.3<br>(14.8–27.9) | 21.3<br>(14.8–27.9) |
| Croatia                | 0.5<br>(0.1–1.6)        | 0.5<br>(0.1–1.6)   | 1.0<br>(0.4–1.6)  | 1.0<br>(0.4–1.6)  | 9.4<br>(5.7–14.2)          | 9.4<br>(5.7–14.2)   | 19.2<br>(12.5–26.0) | 19.0<br>(12.5–25.6) | <0.1<br>(<0.1–0.1)  | <0.1<br>(<0.1–0.1)  | 20.6<br>(13.3–27.4) | 20.6<br>(13.3–27.4) |
| Czechia                | 0.1<br>(<0.1–0.3)       | 0.1<br>(<0.1–0.3)  | 0.9<br>(0.3–1.4)  | 0.9<br>(0.3–1.4)  | 8.4<br>(5.0–13.0)          | 8.4<br>(5.0–13.0)   | 16.6<br>(10.6–22.7) | 16.4<br>(10.4–22.8) | <0.1<br>(<0.1–0.2)  | <0.1<br>(<0.1–0.2)  | 21.1<br>(13.6–30.0) | 21.1<br>(13.6–30.0) |
| Hungary                | 1.7<br>(0.4–4.8)        | 1.7<br>(0.4–4.8)   | 0.9<br>(0.4–1.4)  | 0.9<br>(0.4–1.4)  | 8.4<br>(5.0–12.9)          | 8.4<br>(5.0–12.9)   | 18.1<br>(11.7–24.8) | 18.3<br>(11.7–25.0) | <0.1<br>(<0.1–0.2)  | <0.1<br>(<0.1–0.2)  | 21.4<br>(11.9–30.6) | 21.4<br>(11.9–30.6) |
| Montenegro             | 3.5<br>(0.9–8.7)        | 3.5<br>(0.9–8.7)   | 1.2<br>(0.5–2.0)  | 1.2<br>(0.5–2.0)  | 10.9<br>(6.8–15.8)         | 10.9<br>(6.8–15.8)  | 23.2<br>(15.7–30.6) | 23.1<br>(15.7–30.6) | <0.1<br>(<0.1–0.1)  | <0.1<br>(<0.1–0.1)  | 20.4<br>(14.1–28.1) | 20.4<br>(14.1–28.1) |
| North Macedonia        | 3.2<br>(0.9–7.4)        | 3.2<br>(0.9–7.4)   | 1.0<br>(0.4–1.7)  | 1.0<br>(0.4–1.7)  | 15.1<br>(9.7–21.5)         | 15.1<br>(9.7–21.5)  | 21.9<br>(14.4–29.4) | 22.0<br>(14.3–29.4) | <0.1<br>(<0.1–0.1)  | <0.1<br>(<0.1–0.1)  | 21.8<br>(15.6–28.1) | 21.8<br>(15.6–28.1) |
| Poland                 | 1.3<br>(0.3–3.6)        | 1.3<br>(0.3–3.5)   | 1.0<br>(0.4–1.6)  | 1.0<br>(0.4–1.6)  | 11.4<br>(7.2–16.8)         | 11.5<br>(7.2–16.9)  | 15.4<br>(9.4–22.3)  | 15.8<br>(9.8–21.9)  | <0.1<br>(<0.1–0.2)  | <0.1<br>(<0.1–0.2)  | 21.1<br>(13.4–30.1) | 21.1<br>(13.4–30.1) |
| Romania                | 1.4<br>(0.3–3.7)        | 1.4<br>(0.3–3.7)   | 1.2<br>(0.5–2.0)  | 1.2<br>(0.5–2.0)  | 7.9<br>(4.7–12.1)          | 7.9<br>(4.7–12.1)   | 16.0<br>(9.6–22.7)  | 16.2<br>(9.7–22.7)  | <0.1<br>(<0.1–0.1)  | <0.1<br>(<0.1–0.1)  | 20.7<br>(14.2–28.2) | 20.7<br>(14.2–28.2) |
| Serbia                 | 2.6<br>(0.7–6.5)        | 2.6<br>(0.7–6.5)   | 1.0<br>(0.4–1.6)  | 1.0<br>(0.4–1.6)  | 12.9<br>(8.2–19.1)         | 12.9<br>(8.2–19.1)  | 18.7<br>(11.9–25.7) | 18.8<br>(11.8–25.5) | <0.1<br>(<0.1–0.1)  | <0.1<br>(<0.1–0.1)  | 21.9<br>(14.8–28.9) | 21.9<br>(14.8–28.9) |



|                          | Household air pollution  |                          | Handwashing             |                         | Ambient particulate matter |                         | Secondhand smoke          |                           | High temperature        |                         | Low temperature            |                            |
|--------------------------|--------------------------|--------------------------|-------------------------|-------------------------|----------------------------|-------------------------|---------------------------|---------------------------|-------------------------|-------------------------|----------------------------|----------------------------|
|                          | M                        | F                        | M                       | F                       | M                          | F                       | M                         | F                         | M                       | F                       | M                          | F                          |
| Slovakia                 | 0.1<br>(<0.1–0.3)        | 0.1<br>(<0.1–0.3)        | 0.9<br>(0.3–1.4)        | 0.9<br>(0.3–1.4)        | 9.4<br>(5.5–14.5)          | 9.4<br>(5.5–14.5)       | 14.0<br>(8.1–19.9)        | 14.2<br>(8.4–20.0)        | <0.1<br>(<0.1–0.1)      | <0.1<br>(<0.1–0.1)      | 20.2<br>(13.2–29.4)        | 20.2<br>(13.2–29.4)        |
| Slovenia                 | 0.7<br>(0.1–2.0)         | 0.7<br>(0.1–2.0)         | 0.8<br>(0.3–1.4)        | 0.8<br>(0.3–1.4)        | 8.6<br>(5.3–13.3)          | 8.6<br>(5.3–13.3)       | 17.4<br>(11.3–24.2)       | 17.7<br>(11.7–23.9)       | <0.1<br>(<0.1–0.1)      | <0.1<br>(<0.1–0.1)      | 22.1<br>(15.2–30.1)        | 22.1<br>(15.2–30.1)        |
| Eastern Europe           | 0.3<br>(0.1–0.8)         | 0.3<br>(0.1–0.8)         | 2.5<br>(1.0–4.0)        | 2.5<br>(1.0–4.0)        | 5.7<br>(3.0–9.8)           | 5.6<br>(2.9–9.5)        | 19.3<br>(12.5–26.0)       | 19.4<br>(12.5–26.0)       | <0.1<br>(<0.1–0.3)      | <0.1<br>(<0.1–0.3)      | 17.4<br>(3.4–29.6)         | 17.4<br>(3.7–29.8)         |
| Belarus                  | 0.1<br>(<0.1–0.3)        | 0.1<br>(<0.1–0.3)        | 1.9<br>(0.8–3.1)        | 1.9<br>(0.8–3.1)        | 8.2<br>(4.7–13.0)          | 8.2<br>(4.7–13.0)       | 20.0<br>(12.8–27.0)       | 19.7<br>(12.9–26.4)       | <0.1<br>(<0.1–0.2)      | <0.1<br>(<0.1–0.2)      | 18.3<br>(9.6–30.8)         | 18.3<br>(9.6–30.8)         |
| Estonia                  | 0.5<br>(<0.1–1.8)        | 0.5<br>(<0.1–1.8)        | 1.8<br>(0.7–3.0)        | 1.8<br>(0.7–3.0)        | 1.8<br>(0.6–3.6)           | 1.8<br>(0.6–3.6)        | 15.5<br>(9.9–22.0)        | 16.2<br>(10.2–22.3)       | 0.1<br>(<0.1–0.5)       | 0.1<br>(<0.1–0.5)       | 15.8<br>(3.4–32.6)         | 15.8<br>(3.4–32.6)         |
| Latvia                   | 0.5<br>(0.1–1.5)         | 0.5<br>(0.1–1.5)         | 1.9<br>(0.8–3.1)        | 1.9<br>(0.8–3.1)        | 5.6<br>(3.1–9.1)           | 5.6<br>(3.1–9.1)        | 16.0<br>(9.6–22.8)        | 16.2<br>(9.6–23.0)        | <0.1<br>(<0.1–0.3)      | <0.1<br>(<0.1–0.3)      | 17.2<br>(7.2–31.3)         | 17.2<br>(7.2–31.3)         |
| Lithuania                | 0.2<br>(<0.1–0.7)        | 0.2<br>(<0.1–0.7)        | 1.9<br>(0.8–3.2)        | 1.9<br>(0.8–3.2)        | 4.5<br>(2.3–7.6)           | 4.5<br>(2.3–7.6)        | 14.3<br>(8.3–20.4)        | 14.5<br>(8.7–20.7)        | <0.1<br>(<0.1–0.2)      | <0.1<br>(<0.1–0.2)      | 19.1<br>(9.2–31.0)         | 19.1<br>(9.2–31.0)         |
| Republic of Moldova      | 1.0<br>(0.3–2.2)         | 1.0<br>(0.3–2.2)         | 4.6<br>(1.9–7.4)        | 4.6<br>(1.9–7.4)        | 6.7<br>(3.3–11.9)          | 6.7<br>(3.3–11.9)       | 18.3<br>(12.3–24.7)       | 18.1<br>(12.4–24.5)       | <0.1<br>(<0.1–0.1)      | <0.1<br>(<0.1–0.1)      | 22.1<br>(13.3–30.8)        | 22.1<br>(13.3–30.8)        |
| Russian Federation       | 0.2<br>(<0.1–0.6)        | 0.2<br>(<0.1–0.6)        | 2.2<br>(0.9–3.7)        | 2.3<br>(0.9–3.7)        | 5.2<br>(2.6–9.1)           | 5.1<br>(2.6–8.9)        | 19.6<br>(12.8–26.4)       | 19.9<br>(13.0–26.8)       | <0.1<br>(<0.1–0.4)      | <0.1<br>(<0.1–0.4)      | 16.4<br>(<0.1–31.7)        | 16.5<br>(<0.1–31.5)        |
| Ukraine                  | 0.5<br>(0.1–1.2)         | 0.5<br>(0.1–1.2)         | 3.1<br>(1.2–5.0)        | 3.1<br>(1.2–5.0)        | 7.1<br>(3.7–12.4)          | 7.1<br>(3.7–12.4)       | 18.4<br>(11.7–25.2)       | 18.1<br>(11.3–25.0)       | <0.1<br>(<0.1–0.2)      | <0.1<br>(<0.1–0.2)      | 19.7<br>(13.3–26.3)        | 19.7<br>(13.3–26.3)        |
| <b>High-income</b>       | <b>0.1</b><br>(<0.1–0.3) | <b>0.1</b><br>(<0.1–0.3) | <b>1.5</b><br>(0.6–2.5) | <b>1.5</b><br>(0.6–2.5) | <b>5.2</b><br>(2.9–8.6)    | <b>5.1</b><br>(2.9–8.5) | <b>13.4</b><br>(8.4–18.6) | <b>13.7</b><br>(8.6–18.8) | <b>0.6</b><br>(0.3–1.0) | <b>0.7</b><br>(0.3–1.0) | <b>16.5</b><br>(12.4–21.3) | <b>16.6</b><br>(12.4–21.5) |
| Australasia              | <0.1<br>(<0.1–<0.1)      | <0.1<br>(<0.1–<0.1)      | 1.9<br>(0.8–3.2)        | 1.9<br>(0.8–3.2)        | 1.9<br>(0.4–4.2)           | 1.9<br>(0.4–4.2)        | 11.3<br>(6.5–16.2)        | 11.7<br>(6.9–16.8)        | 6.0<br>(4.1–8.0)        | 6.4<br>(4.3–8.5)        | 8.3<br>(5.3–11.3)          | 7.6<br>(4.5–10.6)          |
| Australia                | <0.1<br>(<0.1–0.1)       | <0.1<br>(<0.1–0.1)       | 1.9<br>(0.8–3.2)        | 1.9<br>(0.8–3.2)        | 1.9<br>(0.5–4.3)           | 1.9<br>(0.5–4.3)        | 11.3<br>(6.6–16.4)        | 11.8<br>(7.0–16.9)        | 7.3<br>(4.8–9.7)        | 7.3<br>(4.8–9.7)        | 5.9<br>(2.7–8.9)           | 5.9<br>(2.7–8.9)           |
| New Zealand              | <0.1<br>(<0.1–0.1)       | <0.1<br>(<0.1–0.1)       | 2.0<br>(0.8–3.3)        | 2.0<br>(0.8–3.3)        | 1.5<br>(0.3–3.5)           | 1.5<br>(0.3–3.5)        | 10.9<br>(6.0–16.1)        | 11.1<br>(6.3–16.5)        | <0.1<br>(<0.1–<0.1)     | <0.1<br>(<0.1–<0.1)     | 20.5<br>(13.3–27.8)        | 20.5<br>(13.3–27.8)        |
| High-income Asia Pacific | <0.1<br>(<0.1–<0.1)      | <0.1<br>(<0.1–<0.1)      | 1.9<br>(0.7–3.1)        | 1.9<br>(0.7–3.1)        | 7.9<br>(4.5–12.5)          | 8.0<br>(4.5–12.7)       | 16.2<br>(10.3–22.4)       | 16.0<br>(10.1–22.1)       | 0.5<br>(<0.1–1.3)       | 0.5<br>(<0.1–1.4)       | 15.3<br>(12.3–18.7)        | 15.4<br>(12.2–18.8)        |
| Brunei Darussalam        | 0.1<br>(<0.1–0.2)        | 0.1<br>(<0.1–0.2)        | 2.0<br>(0.8–3.2)        | 2.0<br>(0.8–3.2)        | 2.6<br>(0.8–5.4)           | 2.6<br>(0.8–5.4)        | 13.6<br>(8.3–19.3)        | 13.8<br>(8.4–19.6)        | 0.9<br>(<0.1–5.8)       | 0.9<br>(<0.1–5.8)       | <0.1<br>(<0.1–0.5)         | <0.1<br>(<0.1–0.5)         |
| Japan                    | <0.1<br>(<0.1–<0.1)      | <0.1<br>(<0.1–<0.1)      | 1.9<br>(0.7–3.1)        | 1.9<br>(0.7–3.1)        | 6.4<br>(3.5–10.6)          | 6.4<br>(3.4–10.5)       | 16.9<br>(10.8–23.4)       | 16.7<br>(10.5–23.0)       | 0.5<br>(<0.1–1.0)       | 0.5<br>(<0.1–1.0)       | 16.0<br>(12.9–19.3)        | 16.1<br>(13.0–19.5)        |
| Republic of Korea        | <0.1<br>(<0.1–<0.1)      | <0.1<br>(<0.1–<0.1)      | 1.9<br>(0.7–3.1)        | 1.9<br>(0.7–3.1)        | 14.2<br>(8.6–21.1)         | 14.2<br>(8.6–21.1)      | 16.3<br>(9.7–23.1)        | 16.0<br>(9.7–22.4)        | 0.2<br>(<0.1–0.9)       | 0.2<br>(<0.1–0.9)       | 20.4<br>(14.7–25.9)        | 20.4<br>(14.7–25.9)        |
| Singapore                | <0.1<br>(<0.1–0.1)       | <0.1<br>(<0.1–0.1)       | 1.9<br>(0.8–3.1)        | 1.9<br>(0.8–3.1)        | 9.5<br>(5.0–16.2)          | 9.5<br>(5.0–16.2)       | 10.0<br>(5.6–14.8)        | 10.5<br>(6.0–15.4)        | 1.3<br>(<0.1–11.7)      | 1.3<br>(<0.1–11.7)      | 0.1<br>(<0.1–1.2)          | 0.1<br>(<0.1–1.2)          |

|                           | Household air pollution |                     | Handwashing      |                  | Ambient particulate matter |                    | Secondhand smoke    |                     | High temperature    |                     | Low temperature     |                     |
|---------------------------|-------------------------|---------------------|------------------|------------------|----------------------------|--------------------|---------------------|---------------------|---------------------|---------------------|---------------------|---------------------|
|                           | M                       | F                   | M                | F                | M                          | F                  | M                   | F                   | M                   | F                   | M                   | F                   |
| High-income North America | <0.1<br>(<0.1-<0.1)     | <0.1<br>(<0.1-<0.1) | 1.0<br>(0.4-1.6) | 1.0<br>(0.4-1.6) | 2.6<br>(1.2-5.0)           | 2.6<br>(1.2-5.0)   | 12.4<br>(7.9-17.4)  | 12.6<br>(8.1-17.3)  | 0.7<br>(0.3-1.1)    | 0.7<br>(0.3-1.0)    | 15.3<br>(11.5-19.4) | 15.4<br>(11.4-19.4) |
| Canada                    | <0.1<br>(<0.1-<0.1)     | <0.1<br>(<0.1-<0.1) | 1.0<br>(0.4-1.7) | 1.0<br>(0.4-1.7) | 2.2<br>(0.9-4.4)           | 2.2<br>(0.9-4.4)   | 11.8<br>(6.9-17.5)  | 12.2<br>(7.7-17.2)  | <0.1<br>(<0.1-0.3)  | <0.1<br>(<0.1-0.3)  | 20.8<br>(0.8-39.3)  | 20.8<br>(0.8-39.3)  |
| United States of America  | <0.1<br>(<0.1-<0.1)     | <0.1<br>(<0.1-<0.1) | 1.0<br>(0.4-1.6) | 1.0<br>(0.4-1.6) | 2.6<br>(1.2-5.0)           | 2.7<br>(1.2-5.0)   | 12.4<br>(8.0-17.5)  | 12.6<br>(8.1-17.4)  | 0.7<br>(0.4-1.1)    | 0.7<br>(0.3-1.1)    | 15.0<br>(11.5-18.6) | 15.0<br>(11.5-18.6) |
| Southern Latin America    | 0.4<br>(0.1-1.1)        | 0.4<br>(0.1-1.1)    | 2.4<br>(1.0-4.0) | 2.4<br>(1.0-4.0) | 6.9<br>(3.7-11.5)          | 6.9<br>(3.7-11.6)  | 12.7<br>(7.5-18.6)  | 13.5<br>(7.8-19.2)  | 0.8<br>(0.5-1.3)    | 0.8<br>(0.5-1.3)    | 16.2<br>(10.3-22.7) | 16.2<br>(10.3-22.8) |
| Argentina                 | 0.4<br>(0.1-1.1)        | 0.4<br>(0.1-1.1)    | 2.5<br>(1.0-4.1) | 2.5<br>(1.0-4.1) | 6.5<br>(3.4-11.1)          | 6.5<br>(3.4-11.1)  | 12.7<br>(7.4-18.6)  | 13.6<br>(7.9-19.4)  | 0.9<br>(0.5-1.4)    | 0.9<br>(0.5-1.4)    | 16.1<br>(10.5-22.4) | 16.1<br>(10.5-22.4) |
| Chile                     | 0.7<br>(0.2-1.9)        | 0.7<br>(0.2-1.9)    | 2.0<br>(0.8-3.4) | 2.0<br>(0.8-3.4) | 11.7<br>(7.1-18.0)         | 11.7<br>(7.1-18.0) | 11.7<br>(6.2-17.6)  | 12.1<br>(6.4-18.5)  | <0.1<br>(<0.1-<0.1) | <0.1<br>(<0.1-<0.1) | 19.3<br>(10.4-29.4) | 19.3<br>(10.4-29.4) |
| Uruguay                   | 0.3<br>(0.1-0.9)        | 0.3<br>(0.1-0.9)    | 2.3<br>(0.9-3.7) | 2.3<br>(0.9-3.7) | 4.0<br>(1.7-7.6)           | 4.0<br>(1.7-7.6)   | 14.7<br>(8.6-20.6)  | 15.6<br>(9.5-21.9)  | 0.1<br>(<0.1-0.3)   | 0.1<br>(<0.1-0.3)   | 8.0<br>(4.5-11.6)   | 8.0<br>(4.5-11.6)   |
| Western Europe            | <0.1<br>(<0.1-0.1)      | <0.1<br>(<0.1-0.1)  | 1.0<br>(0.4-1.7) | 1.0<br>(0.4-1.7) | 5.3<br>(3.0-8.7)           | 5.3<br>(3.0-8.6)   | 13.8<br>(8.4-19.2)  | 14.0<br>(8.6-19.6)  | 0.2<br>(<0.1-0.3)   | 0.2<br>(<0.1-0.3)   | 20.1<br>(14.4-26.3) | 20.2<br>(14.5-26.3) |
| Andorra                   | <0.1<br>(<0.1-<0.1)     | <0.1<br>(<0.1-<0.1) | 1.0<br>(0.4-1.6) | 1.0<br>(0.4-1.6) | 3.5<br>(1.7-6.3)           | 3.5<br>(1.7-6.3)   | 14.7<br>(8.8-20.6)  | 14.8<br>(9.3-20.9)  | <0.1<br>(<0.1-<0.1) | <0.1<br>(<0.1-<0.1) | 17.0<br>(1.9-35.8)  | 17.0<br>(1.9-35.8)  |
| Austria                   | <0.1<br>(<0.1-0.1)      | <0.1<br>(<0.1-0.1)  | 1.0<br>(0.4-1.6) | 1.0<br>(0.4-1.6) | 5.6<br>(3.1-9.1)           | 5.6<br>(3.1-9.1)   | 19.0<br>(12.8-25.7) | 19.0<br>(12.7-25.8) | <0.1<br>(<0.1-0.1)  | <0.1<br>(<0.1-0.1)  | 19.7<br>(10.6-31.5) | 19.7<br>(10.6-31.5) |
| Belgium                   | <0.1<br>(<0.1-<0.1)     | <0.1<br>(<0.1-<0.1) | 1.0<br>(0.4-1.6) | 1.0<br>(0.4-1.6) | 5.9<br>(3.4-9.7)           | 5.9<br>(3.4-9.7)   | 14.6<br>(9.2-20.3)  | 15.3<br>(9.8-21.4)  | <0.1<br>(<0.1-0.1)  | <0.1<br>(<0.1-0.1)  | 23.4<br>(14.7-32.7) | 23.4<br>(14.7-32.7) |
| Cyprus                    | <0.1<br>(<0.1-<0.1)     | <0.1<br>(<0.1-<0.1) | 1.0<br>(0.4-1.6) | 1.0<br>(0.4-1.6) | 7.7<br>(4.5-12.5)          | 7.7<br>(4.5-12.5)  | 17.9<br>(11.5-24.5) | 18.0<br>(11.5-24.9) | 2.1<br>(0.9-3.6)    | 2.1<br>(0.9-3.6)    | 4.5<br>(<0.1-10.9)  | 4.5<br>(<0.1-10.9)  |
| Denmark                   | <0.1<br>(<0.1-<0.1)     | <0.1<br>(<0.1-<0.1) | 1.0<br>(0.4-1.6) | 1.0<br>(0.4-1.6) | 4.0<br>(2.1-7.2)           | 4.0<br>(2.1-7.2)   | 14.5<br>(8.9-20.2)  | 14.8<br>(9.1-20.6)  | <0.1<br>(<0.1-<0.1) | <0.1<br>(<0.1-<0.1) | 23.2<br>(13.0-34.4) | 23.2<br>(13.0-34.4) |
| Finland                   | <0.1<br>(<0.1-<0.1)     | <0.1<br>(<0.1-<0.1) | 1.0<br>(0.4-1.7) | 1.0<br>(0.4-1.7) | 1.2<br>(0.2-2.9)           | 1.2<br>(0.2-2.9)   | 12.1<br>(7.2-17.1)  | 11.7<br>(7.2-16.6)  | <0.1<br>(<0.1-0.3)  | <0.1<br>(<0.1-0.3)  | 17.9<br>(3.8-36.4)  | 17.9<br>(3.8-36.4)  |
| France                    | <0.1<br>(<0.1-<0.1)     | <0.1<br>(<0.1-<0.1) | 1.0<br>(0.4-1.7) | 1.0<br>(0.4-1.7) | 5.1<br>(2.8-8.5)           | 5.1<br>(2.8-8.5)   | 12.8<br>(7.2-18.3)  | 12.9<br>(7.4-18.8)  | <0.1<br>(<0.1-0.1)  | <0.1<br>(<0.1-0.1)  | 21.7<br>(14.9-28.4) | 21.7<br>(14.9-28.4) |
| Germany                   | <0.1<br>(<0.1-<0.1)     | <0.1<br>(<0.1-<0.1) | 1.0<br>(0.4-1.6) | 1.0<br>(0.4-1.6) | 5.3<br>(3.0-8.8)           | 5.3<br>(3.0-8.8)   | 14.5<br>(8.8-20.3)  | 14.6<br>(9.0-20.3)  | <0.1<br>(<0.1-0.2)  | <0.1<br>(<0.1-0.2)  | 22.5<br>(14.3-31.1) | 22.5<br>(14.3-31.1) |
| Greece                    | 0.1<br>(<0.1-0.2)       | 0.1<br>(<0.1-0.2)   | 1.0<br>(0.4-1.7) | 1.0<br>(0.4-1.7) | 6.9<br>(4.0-10.9)          | 6.9<br>(4.0-10.9)  | 19.7<br>(12.4-27.1) | 19.7<br>(12.7-26.8) | 0.1<br>(<0.1-0.3)   | 0.1<br>(<0.1-0.3)   | 15.7<br>(12.3-19.4) | 15.7<br>(12.3-19.4) |
| Iceland                   | <0.1<br>(<0.1-<0.1)     | <0.1<br>(<0.1-<0.1) | 1.0<br>(0.4-1.7) | 1.0<br>(0.4-1.7) | 1.2<br>(0.2-3.0)           | 1.2<br>(0.2-3.0)   | 16.0<br>(10.2-22.2) | 16.8<br>(11.3-22.9) | <0.1<br>(0.0-0.0)   | <0.1<br>(0.0-0.0)   | 21.5<br>(5.1-38.7)  | 21.5<br>(5.1-38.7)  |
| Ireland                   | <0.1<br>(<0.1-<0.1)     | <0.1<br>(<0.1-<0.1) | 1.0<br>(0.4-1.6) | 1.0<br>(0.4-1.6) | 2.7<br>(1.2-5.1)           | 2.7<br>(1.2-5.1)   | 11.8<br>(6.9-16.9)  | 12.0<br>(7.0-16.8)  | <0.1<br>(0.0-0.0)   | <0.1<br>(0.0-0.0)   | 25.7<br>(14.4-37.2) | 25.7<br>(14.4-37.2) |

|                                    | Household air pollution   |                           | Handwashing               |                           | Ambient particulate matter |                           | Secondhand smoke         |                          | High temperature             |                              | Low temperature          |                          |
|------------------------------------|---------------------------|---------------------------|---------------------------|---------------------------|----------------------------|---------------------------|--------------------------|--------------------------|------------------------------|------------------------------|--------------------------|--------------------------|
|                                    | M                         | F                         | M                         | F                         | M                          | F                         | M                        | F                        | M                            | F                            | M                        | F                        |
| Israel                             | <0.1<br>(<0.1–0.1)        | <0.1<br>(<0.1–0.1)        | 1.0<br>(0.4–1.7)          | 1.0<br>(0.4–1.7)          | 10.1<br>(6.1–15.3)         | 10.1<br>(6.1–15.3)        | 12.7<br>(7.3–18.6)       | 13.3<br>(7.9–19.0)       | 2.1<br>(0.8–3.9)             | 2.1<br>(0.8–3.9)             | 3.5<br>(<0.1–10.4)       | 3.5<br>(<0.1–10.4)       |
| Italy                              | <0.1<br>(<0.1–0.1)        | <0.1<br>(<0.1–0.1)        | 1.0<br>(0.4–1.7)          | 1.0<br>(0.4–1.7)          | 8.0<br>(4.8–12.4)          | 7.9<br>(4.7–12.2)         | 14.1<br>(8.8–19.5)       | 14.8<br>(9.4–20.8)       | 0.1<br>(<0.1–0.2)            | 0.1<br>(<0.1–0.2)            | 17.5<br>(13.1–21.9)      | 17.4<br>(13.0–21.7)      |
| Luxembourg                         | <0.1<br>(<0.1–<0.1)       | <0.1<br>(<0.1–<0.1)       | 1.0<br>(0.4–1.6)          | 1.0<br>(0.4–1.6)          | 4.2<br>(2.2–7.3)           | 4.2<br>(2.2–7.3)          | 14.9<br>(9.3–21.3)       | 15.1<br>(9.5–20.9)       | <0.1<br>(<0.1–0.1)           | <0.1<br>(<0.1–0.1)           | 23.1<br>(13.3–33.6)      | 23.1<br>(13.3–33.6)      |
| Malta                              | <0.1<br>(<0.1–<0.1)       | <0.1<br>(<0.1–<0.1)       | 1.0<br>(0.4–1.7)          | 1.0<br>(0.4–1.7)          | 6.1<br>(3.4–9.9)           | 6.1<br>(3.4–9.9)          | 15.7<br>(9.9–22.0)       | 16.2<br>(10.7–22.0)      | 0.3<br>(<0.1–0.9)            | 0.3<br>(<0.1–0.9)            | 3.6<br>(<0.1–15.0)       | 3.6<br>(<0.1–15.0)       |
| Monaco                             | <0.1<br>(<0.1–<0.1)       | <0.1<br>(<0.1–<0.1)       | 1.0<br>(0.4–1.6)          | 1.0<br>(0.4–1.6)          | 5.3<br>(2.5–9.2)           | 5.3<br>(2.5–9.2)          | 14.9<br>(9.3–20.9)       | 15.2<br>(9.4–21.2)       | <0.1<br>(<0.1–0.1)           | <0.1<br>(<0.1–0.1)           | 15.4<br>(11.9–19.0)      | 15.4<br>(11.9–19.0)      |
| Netherlands                        | <0.1<br>(<0.1–<0.1)       | <0.1<br>(<0.1–<0.1)       | 1.0<br>(0.4–1.6)          | 1.0<br>(0.4–1.6)          | 5.5<br>(3.1–9.0)           | 5.5<br>(3.1–9.0)          | 12.2<br>(7.1–17.6)       | 12.6<br>(7.6–18.0)       | <0.1<br>(<0.1–0.1)           | <0.1<br>(<0.1–0.1)           | 23.6<br>(13.4–33.5)      | 23.6<br>(13.4–33.5)      |
| Norway                             | <0.1<br>(<0.1–<0.1)       | <0.1<br>(<0.1–<0.1)       | 1.0<br>(0.4–1.6)          | 1.0<br>(0.4–1.6)          | 1.8<br>(0.6–3.9)           | 1.8<br>(0.6–3.9)          | 12.0<br>(7.0–17.5)       | 12.6<br>(7.5–18.1)       | <0.1<br>(<0.1–0.1)           | <0.1<br>(<0.1–0.1)           | 19.0<br>(5.9–35.8)       | 19.0<br>(5.8–35.8)       |
| Portugal                           | 0.1<br>(<0.1–0.2)         | 0.1<br>(<0.1–0.2)         | 1.1<br>(0.4–1.8)          | 1.1<br>(0.4–1.8)          | 3.0<br>(1.4–5.5)           | 3.0<br>(1.4–5.5)          | 12.1<br>(7.0–17.2)       | 12.3<br>(7.0–17.8)       | 0.2<br>(<0.1–0.3)            | 0.2<br>(<0.1–0.3)            | 15.3<br>(11.7–19.2)      | 15.3<br>(11.7–19.2)      |
| San Marino                         | <0.1<br>(<0.1–<0.1)       | <0.1<br>(<0.1–<0.1)       | 1.0<br>(0.4–1.7)          | 1.0<br>(0.4–1.7)          | 4.1<br>(1.5–7.9)           | 4.1<br>(1.5–7.9)          | 16.1<br>(10.0–22.5)      | 16.5<br>(10.6–22.5)      | 0.1<br>(<0.1–0.2)            | 0.1<br>(<0.1–0.2)            | 15.7<br>(12.5–19.0)      | 15.7<br>(12.5–19.0)      |
| Spain                              | 0.1<br>(<0.1–0.2)         | 0.1<br>(<0.1–0.2)         | 1.0<br>(0.4–1.7)          | 1.0<br>(0.4–1.7)          | 4.0<br>(2.1–6.9)           | 4.0<br>(2.1–6.9)          | 15.5<br>(9.3–21.7)       | 15.4<br>(9.6–21.8)       | 0.2<br>(<0.1–0.5)            | 0.2<br>(<0.1–0.5)            | 17.3<br>(13.3–21.5)      | 17.3<br>(13.3–21.5)      |
| Sweden                             | <0.1<br>(<0.1–<0.1)       | <0.1<br>(<0.1–<0.1)       | 1.0<br>(0.4–1.7)          | 1.0<br>(0.4–1.7)          | 1.2<br>(0.3–3.0)           | 1.2<br>(0.3–3.0)          | 11.4<br>(6.9–16.5)       | 10.9<br>(6.7–15.7)       | <0.1<br>(<0.1–0.1)           | <0.1<br>(<0.1–0.1)           | 18.5<br>(5.5–33.0)       | 18.5<br>(5.9–32.8)       |
| Switzerland                        | <0.1<br>(<0.1–<0.1)       | <0.1<br>(<0.1–<0.1)       | 1.0<br>(0.4–1.6)          | 1.0<br>(0.4–1.6)          | 4.1<br>(2.2–7.0)           | 4.1<br>(2.2–7.0)          | 13.0<br>(7.7–18.5)       | 13.2<br>(8.0–19.0)       | <0.1<br>(<0.1–<0.1)          | <0.1<br>(<0.1–<0.1)          | 21.1<br>(11.3–32.9)      | 21.1<br>(11.3–32.9)      |
| United Kingdom                     | <0.1<br>(<0.1–<0.1)       | <0.1<br>(<0.1–<0.1)       | 1.0<br>(0.4–1.7)          | 1.0<br>(0.4–1.7)          | 4.3<br>(2.3–7.4)           | 4.3<br>(2.3–7.4)          | 12.7<br>(7.3–18.5)       | 12.9<br>(7.6–18.4)       | <0.1<br>(<0.1–<0.1)          | <0.1<br>(<0.1–<0.1)          | 24.8<br>(15.7–34.9)      | 24.9<br>(15.8–34.8)      |
| <b>Latin America and Caribbean</b> | <b>8.4<br/>(4.3–13.9)</b> | <b>9.7<br/>(5.0–15.8)</b> | <b>8.2<br/>(3.4–12.8)</b> | <b>8.6<br/>(3.7–13.5)</b> | <b>9.2<br/>(6.1–13.3)</b>  | <b>9.0<br/>(6.0–13.1)</b> | <b>5.6<br/>(3.0–8.6)</b> | <b>5.7<br/>(3.0–8.8)</b> | <b>1.3<br/>(&lt;0.1–4.3)</b> | <b>1.3<br/>(&lt;0.1–4.4)</b> | <b>3.2<br/>(1.5–4.9)</b> | <b>3.1<br/>(1.5–4.8)</b> |
| Andean Latin America               | 4.4<br>(1.8–8.8)          | 4.5<br>(1.8–9.1)          | 7.8<br>(3.2–12.2)         | 7.8<br>(3.2–12.3)         | 13.1<br>(8.1–19.7)         | 13.2<br>(8.2–19.9)        | 2.8<br>(1.0–5.3)         | 2.8<br>(1.1–5.3)         | 0.6<br>(<0.1–1.5)            | 0.6<br>(<0.1–1.5)            | 8.9<br>(5.5–12.5)        | 9.0<br>(5.7–12.6)        |
| Bolivia (Plurinational State of)   | 7.7<br>(3.1–14.6)         | 7.7<br>(3.1–14.6)         | 8.4<br>(3.5–13.2)         | 8.4<br>(3.5–13.2)         | 12.5<br>(7.4–19.5)         | 12.5<br>(7.4–19.5)        | 2.7<br>(0.9–5.2)         | 2.8<br>(1.0–5.3)         | 1.5<br>(0.5–2.7)             | 1.5<br>(0.5–2.7)             | 9.1<br>(5.9–12.6)        | 9.1<br>(5.9–12.6)        |
| Ecuador                            | 1.2<br>(0.4–3.0)          | 1.2<br>(0.4–3.0)          | 6.9<br>(2.8–11.0)         | 6.9<br>(2.8–11.0)         | 10.2<br>(5.4–16.3)         | 10.2<br>(5.4–16.3)        | 2.6<br>(0.9–5.1)         | 2.7<br>(1.0–5.2)         | 0.3<br>(<0.1–1.2)            | 0.3<br>(<0.1–1.2)            | 5.8<br>(3.6–8.1)         | 5.8<br>(3.6–8.1)         |
| Peru                               | 4.3<br>(1.6–8.9)          | 4.3<br>(1.6–8.9)          | 7.9<br>(3.3–12.5)         | 7.9<br>(3.3–12.5)         | 14.9<br>(9.3–22.4)         | 14.9<br>(9.3–22.4)        | 2.9<br>(1.1–5.4)         | 2.9<br>(1.1–5.5)         | 0.2<br>(<0.1–0.9)            | 0.2<br>(<0.1–0.9)            | 10.4<br>(6.0–15.2)       | 10.4<br>(6.0–15.2)       |
| Caribbean                          | 26.8<br>(15.8–38.6)       | 30.3<br>(18.3–43.2)       | 17.8<br>(8.0–26.7)        | 18.2<br>(8.2–27.1)        | 6.6<br>(3.0–12.7)          | 6.2<br>(2.8–11.8)         | 4.3<br>(2.2–6.7)         | 4.0<br>(2.0–6.4)         | 0.8<br>(<0.1–2.7)            | 0.8<br>(<0.1–2.8)            | <0.1<br>(<0.1–1.3)       | <0.1<br>(<0.1–1.3)       |

|                                  | Household air pollution |                     | Handwashing        |                    | Ambient particulate matter |                    | Secondhand smoke   |                    | High temperature  |                   | Low temperature    |                    |
|----------------------------------|-------------------------|---------------------|--------------------|--------------------|----------------------------|--------------------|--------------------|--------------------|-------------------|-------------------|--------------------|--------------------|
|                                  | M                       | F                   | M                  | F                  | M                          | F                  | M                  | F                  | M                 | F                 | M                  | F                  |
| Antigua and Barbuda              | 0.1<br>(<0.1–0.4)       | 0.1<br>(<0.1–0.4)   | 7.5<br>(3.1–11.9)  | 7.5<br>(3.1–11.9)  | 8.7<br>(2.7–18.4)          | 8.7<br>(2.7–18.4)  | 6.4<br>(3.3–9.7)   | 6.6<br>(3.7–10.1)  | 0.4<br>(<0.1–2.3) | 0.4<br>(<0.1–2.3) | 0.3<br>(<0.1–1.7)  | 0.3<br>(<0.1–1.7)  |
| Bahamas                          | 0.2<br>(<0.1–0.5)       | 0.2<br>(<0.1–0.5)   | 6.3<br>(2.6–10.2)  | 6.3<br>(2.6–10.2)  | 7.6<br>(1.7–16.4)          | 7.6<br>(1.7–16.4)  | 7.6<br>(4.3–11.8)  | 7.7<br>(4.4–11.3)  | 1.6<br>(<0.1–4.5) | 1.6<br>(<0.1–4.5) | 0.3<br>(<0.1–2.0)  | 0.3<br>(<0.1–2.0)  |
| Barbados                         | <0.1<br>(<0.1–<0.1)     | <0.1<br>(<0.1–<0.1) | 7.1<br>(2.9–11.4)  | 7.1<br>(2.9–11.4)  | 10.8<br>(3.8–21.4)         | 10.8<br>(3.8–21.4) | 5.1<br>(2.7–7.8)   | 5.2<br>(2.9–8.0)   | 1.2<br>(<0.1–3.9) | 1.2<br>(<0.1–3.9) | 0.4<br>(<0.1–2.0)  | 0.4<br>(<0.1–2.0)  |
| Belize                           | 3.6<br>(1.3–7.6)        | 3.6<br>(1.3–7.6)    | 9.5<br>(4.0–15.0)  | 9.5<br>(4.0–15.0)  | 10.5<br>(3.4–20.6)         | 10.5<br>(3.4–20.6) | 7.4<br>(4.0–11.1)  | 7.3<br>(4.0–10.9)  | 1.7<br>(<0.1–4.2) | 1.7<br>(<0.1–4.2) | 0.1<br>(<0.1–1.3)  | 0.1<br>(<0.1–1.3)  |
| Cuba                             | 0.3<br>(0.1–0.9)        | 0.3<br>(0.1–0.9)    | 6.0<br>(2.5–9.6)   | 6.0<br>(2.5–9.6)   | 8.8<br>(3.7–16.9)          | 8.8<br>(3.7–16.9)  | 10.5<br>(6.0–15.6) | 10.0<br>(5.9–14.5) | 1.5<br>(<0.1–4.0) | 1.5<br>(<0.1–4.0) | 0.2<br>(<0.1–1.6)  | 0.2<br>(<0.1–1.6)  |
| Dominica                         | 1.3<br>(0.3–3.2)        | 1.3<br>(0.3–3.2)    | 8.3<br>(3.5–13.2)  | 8.3<br>(3.5–13.2)  | 9.4<br>(3.3–18.9)          | 9.4<br>(3.3–18.9)  | 5.6<br>(2.8–9.0)   | 5.7<br>(3.0–8.7)   | 1.1<br>(<0.1–3.5) | 1.1<br>(<0.1–3.5) | 0.3<br>(<0.1–3.2)  | 0.3<br>(<0.1–3.2)  |
| Dominican Republic               | 2.4<br>(0.8–5.5)        | 2.4<br>(0.8–5.5)    | 16.0<br>(7.1–24.3) | 16.0<br>(7.1–24.3) | 8.8<br>(3.4–17.8)          | 8.8<br>(3.4–17.8)  | 6.0<br>(3.4–8.9)   | 6.2<br>(3.6–9.1)   | 0.6<br>(<0.1–2.2) | 0.6<br>(<0.1–2.2) | <0.1<br>(<0.1–1.7) | <0.1<br>(<0.1–1.7) |
| Grenada                          | 0.5<br>(0.1–1.2)        | 0.5<br>(0.1–1.2)    | 7.6<br>(3.2–12.2)  | 7.6<br>(3.2–12.2)  | 10.8<br>(3.4–21.4)         | 10.8<br>(3.4–21.4) | 5.5<br>(2.6–9.1)   | 5.4<br>(2.6–8.8)   | 1.4<br>(<0.1–4.2) | 1.4<br>(<0.1–4.2) | 0.3<br>(<0.1–1.8)  | 0.3<br>(<0.1–1.8)  |
| Guyana                           | 1.4<br>(0.5–3.2)        | 1.4<br>(0.5–3.2)    | 14.1<br>(6.1–21.9) | 14.1<br>(6.1–21.9) | 10.0<br>(3.2–20.4)         | 10.0<br>(3.2–20.4) | 7.4<br>(3.8–11.2)  | 7.3<br>(3.8–11.2)  | 0.9<br>(<0.1–2.8) | 0.9<br>(<0.1–2.8) | <0.1<br>(<0.1–1.3) | <0.1<br>(<0.1–1.3) |
| Haiti                            | 38.3<br>(23.2–52.8)     | 38.3<br>(23.2–52.8) | 19.5<br>(8.7–29.2) | 19.5<br>(8.7–29.2) | 5.5<br>(2.2–11.4)          | 5.5<br>(2.2–11.4)  | 3.2<br>(1.4–5.4)   | 3.2<br>(1.4–5.4)   | 0.8<br>(<0.1–3.0) | 0.8<br>(<0.1–3.0) | <0.1<br>(<0.1–1.3) | <0.1<br>(<0.1–1.3) |
| Jamaica                          | 1.7<br>(0.5–4.2)        | 1.7<br>(0.5–4.2)    | 11.2<br>(4.8–17.4) | 11.2<br>(4.8–17.4) | 7.7<br>(4.0–13.1)          | 7.7<br>(4.0–13.1)  | 8.9<br>(5.2–13.0)  | 8.8<br>(5.1–12.9)  | 1.2<br>(<0.1–4.3) | 1.2<br>(<0.1–4.3) | 0.1<br>(<0.1–1.1)  | 0.1<br>(<0.1–1.1)  |
| Saint Kitts and Nevis            | 0.3<br>(0.1–0.9)        | 0.3<br>(0.1–0.9)    | 7.6<br>(3.2–12.1)  | 7.6<br>(3.2–12.1)  | 3.5<br>(1.3–6.7)           | 3.5<br>(1.3–6.7)   | 7.1<br>(3.7–11.2)  | 7.1<br>(3.8–10.9)  | 1.0<br>(<0.1–3.9) | 1.0<br>(<0.1–3.9) | 0.4<br>(<0.1–2.3)  | 0.4<br>(<0.1–2.3)  |
| Saint Lucia                      | 0.6<br>(0.2–1.5)        | 0.6<br>(0.2–1.5)    | 5.7<br>(2.3–9.2)   | 5.7<br>(2.3–9.2)   | 10.7<br>(3.7–21.0)         | 10.7<br>(3.7–21.0) | 5.9<br>(3.1–8.9)   | 5.7<br>(3.0–8.8)   | 1.7<br>(<0.1–4.8) | 1.7<br>(<0.1–4.8) | 0.3<br>(<0.1–1.9)  | 0.3<br>(<0.1–1.9)  |
| Saint Vincent and the Grenadines | 0.8<br>(0.2–1.9)        | 0.8<br>(0.2–1.9)    | 9.1<br>(3.8–14.3)  | 9.1<br>(3.8–14.3)  | 10.6<br>(3.3–21.1)         | 10.6<br>(3.3–21.1) | 6.5<br>(3.2–10.0)  | 6.4<br>(3.3–9.9)   | 1.3<br>(<0.1–4.0) | 1.3<br>(<0.1–4.0) | 0.4<br>(<0.1–2.0)  | 0.4<br>(<0.1–2.0)  |
| Suriname                         | 2.0<br>(0.6–4.6)        | 2.0<br>(0.6–4.6)    | 9.3<br>(3.9–14.9)  | 9.3<br>(3.9–14.9)  | 10.6<br>(4.2–20.5)         | 10.6<br>(4.2–20.5) | 11.7<br>(6.6–17.1) | 11.7<br>(6.6–17.0) | 1.0<br>(<0.1–3.0) | 1.0<br>(<0.1–3.0) | 0.3<br>(<0.1–1.6)  | 0.3<br>(<0.1–1.6)  |
| Trinidad and Tobago              | <0.1<br>(<0.1–<0.1)     | <0.1<br>(<0.1–<0.1) | 6.8<br>(2.8–10.9)  | 6.8<br>(2.8–10.9)  | 11.0<br>(3.1–22.8)         | 11.0<br>(3.1–22.8) | 8.6<br>(4.5–13.2)  | 8.4<br>(4.5–12.8)  | 0.4<br>(<0.1–2.6) | 0.4<br>(<0.1–2.6) | 0.2<br>(<0.1–1.2)  | 0.2<br>(<0.1–1.2)  |
| Central Latin America            | 9.0<br>(4.3–15.6)       | 8.9<br>(4.3–15.4)   | 6.4<br>(2.7–10.3)  | 6.5<br>(2.7–10.3)  | 10.6<br>(7.0–15.3)         | 10.7<br>(7.0–15.5) | 4.0<br>(1.7–6.9)   | 4.0<br>(1.6–7.0)   | 1.3<br>(0.1–3.3)  | 1.3<br>(0.1–3.2)  | 2.8<br>(1.0–4.7)   | 3.1<br>(1.3–4.9)   |
| Colombia                         | 2.2<br>(0.7–5.0)        | 2.2<br>(0.7–5.0)    | 6.1<br>(2.5–9.9)   | 6.1<br>(2.5–9.9)   | 11.2<br>(6.5–17.4)         | 11.2<br>(6.5–17.4) | 4.9<br>(2.1–8.0)   | 5.1<br>(2.4–8.3)   | 1.0<br>(<0.1–3.4) | 1.0<br>(<0.1–3.4) | 3.4<br>(1.8–5.1)   | 3.4<br>(1.8–5.1)   |
| Costa Rica                       | 1.1<br>(0.3–2.5)        | 1.1<br>(0.3–2.5)    | 6.8<br>(2.8–10.9)  | 6.8<br>(2.8–10.9)  | 8.8<br>(5.2–13.7)          | 8.8<br>(5.2–13.7)  | 8.0<br>(4.5–11.7)  | 8.0<br>(4.4–11.7)  | 0.3<br>(<0.1–2.2) | 0.3<br>(<0.1–2.2) | 0.6<br>(<0.1–2.7)  | 0.6<br>(<0.1–2.7)  |

|                                     | Household air pollution    |                            | Handwashing               |                           | Ambient particulate matter  |                             | Secondhand smoke           |                            | High temperature         |                          | Low temperature           |                           |
|-------------------------------------|----------------------------|----------------------------|---------------------------|---------------------------|-----------------------------|-----------------------------|----------------------------|----------------------------|--------------------------|--------------------------|---------------------------|---------------------------|
|                                     | M                          | F                          | M                         | F                         | M                           | F                           | M                          | F                          | M                        | F                        | M                         | F                         |
| El Salvador                         | 3.8<br>(1.5–7.7)           | 3.8<br>(1.5–7.7)           | 9.0<br>(3.8–14.4)         | 9.0<br>(3.8–14.4)         | 11.1<br>(5.9–18.0)          | 11.1<br>(5.9–18.0)          | 3.6<br>(1.7–5.8)           | 3.6<br>(1.8–5.9)           | 1.4<br>(<0.1–6.7)        | 1.4<br>(<0.1–6.7)        | <0.1<br>(<0.1–0.6)        | <0.1<br>(<0.1–0.6)        |
| Guatemala                           | 17.1<br>(8.3–29.5)         | 17.1<br>(8.3–29.5)         | 7.6<br>(3.2–12.1)         | 7.6<br>(3.2–12.1)         | 11.3<br>(6.9–17.1)          | 11.3<br>(6.9–17.1)          | 3.2<br>(1.2–5.8)           | 3.3<br>(1.3–5.8)           | 1.7<br>(0.5–3.5)         | 1.7<br>(0.5–3.5)         | 1.5<br>(<0.1–3.2)         | 1.5<br>(<0.1–3.2)         |
| Honduras                            | 21.0<br>(11.0–33.9)        | 21.0<br>(11.0–33.9)        | 5.4<br>(2.2–8.6)          | 5.4<br>(2.2–8.6)          | 8.9<br>(5.3–13.6)           | 8.9<br>(5.3–13.6)           | 6.7<br>(3.4–10.3)          | 6.8<br>(3.6–10.4)          | 0.7<br>(<0.1–2.6)        | 0.7<br>(<0.1–2.6)        | <0.1<br>(<0.1–2.4)        | <0.1<br>(<0.1–2.4)        |
| Mexico                              | 4.9<br>(2.1–8.8)           | 4.9<br>(2.1–8.9)           | 5.2<br>(2.1–8.4)          | 5.2<br>(2.1–8.4)          | 9.9<br>(6.3–14.8)           | 10.0<br>(6.3–14.8)          | 3.1<br>(0.8–6.6)           | 3.2<br>(0.9–6.5)           | 1.1<br>(0.1–2.2)         | 1.1<br>(0.1–2.1)         | 6.2<br>(3.6–9.1)          | 6.4<br>(3.9–9.2)          |
| Nicaragua                           | 16.5<br>(7.7–28.1)         | 16.5<br>(7.7–28.1)         | 8.1<br>(3.4–12.8)         | 8.1<br>(3.4–12.8)         | 8.7<br>(5.0–14.1)           | 8.7<br>(5.0–14.1)           | 5.6<br>(2.6–9.2)           | 5.7<br>(2.7–9.5)           | 0.8<br>(<0.1–4.9)        | 0.8<br>(<0.1–4.9)        | <0.1<br>(<0.1–1.1)        | <0.1<br>(<0.1–1.1)        |
| Panama                              | 1.7<br>(0.5–3.8)           | 1.7<br>(0.5–3.8)           | 6.1<br>(2.5–9.8)          | 6.1<br>(2.5–9.8)          | 6.5<br>(3.3–10.9)           | 6.5<br>(3.3–10.9)           | 4.2<br>(2.2–6.3)           | 4.4<br>(2.4–6.5)           | 0.6<br>(<0.1–2.3)        | 0.6<br>(<0.1–2.3)        | <0.1<br>(<0.1–1.0)        | <0.1<br>(<0.1–1.0)        |
| Venezuela (Bolivarian Republic of)  | 0.1<br>(<0.1–0.2)          | 0.1<br>(<0.1–0.2)          | 5.7<br>(2.4–9.2)          | 5.7<br>(2.4–9.2)          | 11.1<br>(5.9–18.6)          | 11.1<br>(5.9–18.6)          | 6.2<br>(2.7–10.3)          | 6.4<br>(2.9–10.8)          | 1.2<br>(<0.1–9.4)        | 1.2<br>(<0.1–9.4)        | 0.1<br>(<0.1–1.7)         | 0.1<br>(<0.1–1.7)         |
| Tropical Latin America              | 2.7<br>(0.9–6.0)           | 2.9<br>(1.0–6.4)           | 6.6<br>(2.7–10.7)         | 6.7<br>(2.8–10.8)         | 5.4<br>(3.1–8.8)            | 5.4<br>(3.1–8.6)            | 10.4<br>(6.2–15.1)         | 10.8<br>(6.4–15.7)         | 2.0<br>(<0.1–9.4)        | 2.0<br>(<0.1–9.7)        | 0.8<br>(<0.1–2.3)         | 0.8<br>(<0.1–2.3)         |
| Brazil                              | 2.5<br>(0.8–5.6)           | 2.7<br>(0.9–6.0)           | 6.6<br>(2.7–10.6)         | 6.7<br>(2.7–10.7)         | 5.4<br>(3.1–8.7)            | 5.3<br>(3.1–8.6)            | 10.4<br>(6.2–15.3)         | 10.9<br>(6.4–15.8)         | 1.9<br>(<0.1–9.5)        | 1.9<br>(<0.1–10.0)       | 0.8<br>(<0.1–2.3)         | 0.8<br>(<0.1–2.2)         |
| Paraguay                            | 7.9<br>(2.9–15.8)          | 7.9<br>(2.9–15.8)          | 7.9<br>(3.3–12.7)         | 7.9<br>(3.3–12.7)         | 6.2<br>(3.6–10.5)           | 6.2<br>(3.6–10.5)           | 8.9<br>(5.0–13.1)          | 8.8<br>(4.9–13.0)          | 5.2<br>(2.9–7.6)         | 5.2<br>(2.9–7.6)         | 0.9<br>(<0.1–5.0)         | 0.9<br>(<0.1–5.0)         |
| <b>North Africa and Middle East</b> | <b>11.0<br/>(6.3–16.5)</b> | <b>11.8<br/>(6.5–18.0)</b> | <b>8.9<br/>(4.0–13.8)</b> | <b>9.4<br/>(4.0–14.6)</b> | <b>20.0<br/>(14.0–26.9)</b> | <b>19.2<br/>(13.5–25.9)</b> | <b>14.2<br/>(9.0–19.5)</b> | <b>14.0<br/>(9.0–19.1)</b> | <b>5.9<br/>(3.7–8.2)</b> | <b>5.8<br/>(3.7–8.3)</b> | <b>6.6<br/>(2.7–11.0)</b> | <b>6.8<br/>(2.8–11.0)</b> |
| Afghanistan                         | 35.9<br>(22.5–48.0)        | 35.9<br>(22.5–48.0)        | 15.7<br>(6.8–23.8)        | 15.7<br>(6.8–23.8)        | 10.9<br>(4.6–19.4)          | 10.9<br>(4.6–19.4)          | 10.1<br>(5.8–14.7)         | 10.1<br>(5.9–14.5)         | 3.1<br>(1.9–4.2)         | 3.1<br>(1.9–4.2)         | 13.7<br>(9.0–19.6)        | 13.7<br>(9.0–19.6)        |
| Algeria                             | 0.1<br>(<0.1–0.1)          | 0.1<br>(<0.1–0.1)          | 4.9<br>(2.0–7.9)          | 4.9<br>(2.0–7.9)          | 16.6<br>(9.1–25.5)          | 16.6<br>(9.1–25.5)          | 16.6<br>(10.6–22.5)        | 16.8<br>(10.8–23.0)        | 9.2<br>(6.2–12.2)        | 9.2<br>(6.2–12.2)        | 4.3<br>(<0.1–10.1)        | 4.3<br>(<0.1–10.1)        |
| Bahrain                             | 0.1<br>(<0.1–0.2)          | 0.1<br>(<0.1–0.2)          | 4.6<br>(1.9–7.4)          | 4.6<br>(1.9–7.4)          | 26.5<br>(17.9–36.4)         | 26.5<br>(17.9–36.4)         | 12.3<br>(7.5–17.7)         | 12.9<br>(7.9–18.6)         | 11.6<br>(5.8–16.6)       | 11.6<br>(5.8–16.6)       | 2.0<br>(<0.1–10.1)        | 2.0<br>(<0.1–10.1)        |
| Egypt                               | <0.1<br>(<0.1–0.1)         | <0.1<br>(<0.1–0.1)         | 3.8<br>(1.5–6.3)          | 3.8<br>(1.5–6.3)          | 28.9<br>(19.3–40.0)         | 28.9<br>(19.3–40.0)         | 16.3<br>(10.3–22.3)        | 16.3<br>(10.3–22.3)        | 7.7<br>(4.8–10.9)        | 7.7<br>(4.8–10.9)        | 2.7<br>(<0.1–9.1)         | 2.7<br>(<0.1–9.1)         |
| Iran (Islamic Republic of)          | 0.1<br>(<0.1–0.2)          | 0.1<br>(<0.1–0.2)          | 4.3<br>(1.7–7.1)          | 4.3<br>(1.7–7.1)          | 19.3<br>(12.7–27.1)         | 19.6<br>(12.9–27.6)         | 13.3<br>(8.1–19.1)         | 13.8<br>(8.7–19.2)         | 3.7<br>(2.6–5.0)         | 4.1<br>(2.8–5.4)         | 12.3<br>(8.9–15.5)        | 11.9<br>(8.3–15.1)        |
| Iraq                                | 0.1<br>(<0.1–0.1)          | 0.1<br>(<0.1–0.1)          | 2.7<br>(1.1–4.5)          | 2.7<br>(1.1–4.5)          | 22.7<br>(14.6–32.4)         | 22.7<br>(14.6–32.4)         | 16.1<br>(10.4–22.2)        | 15.8<br>(10.0–21.7)        | 10.8<br>(7.5–13.8)       | 10.8<br>(7.5–13.8)       | 4.7<br>(<0.1–10.6)        | 4.7<br>(<0.1–10.6)        |
| Jordan                              | <0.1<br>(<0.1–<0.1)        | <0.1<br>(<0.1–<0.1)        | 4.2<br>(1.7–6.9)          | 4.2<br>(1.7–6.9)          | 15.7<br>(9.8–23.4)          | 15.7<br>(9.8–23.4)          | 16.6<br>(10.3–22.8)        | 17.1<br>(10.7–23.3)        | 3.2<br>(1.7–4.9)         | 3.2<br>(1.7–4.9)         | 6.0<br>(<0.1–12.1)        | 6.0<br>(<0.1–12.1)        |
| Kuwait                              | <0.1<br>(<0.1–<0.1)        | <0.1<br>(<0.1–<0.1)        | 3.7<br>(1.5–6.0)          | 3.7<br>(1.5–6.0)          | 27.1<br>(18.5–36.9)         | 27.1<br>(18.5–36.9)         | 18.6<br>(12.1–25.3)        | 18.4<br>(12.4–25.1)        | 13.1<br>(7.6–18.0)       | 13.1<br>(7.6–18.0)       | 3.1<br>(<0.1–15.6)        | 3.1<br>(<0.1–15.6)        |

|                      | Household air pollution           |                                   | Handwashing                      |                                  | Ambient particulate matter        |                                   | Secondhand smoke                |                                 | High temperature                |                                 | Low temperature                    |                                    |
|----------------------|-----------------------------------|-----------------------------------|----------------------------------|----------------------------------|-----------------------------------|-----------------------------------|---------------------------------|---------------------------------|---------------------------------|---------------------------------|------------------------------------|------------------------------------|
|                      | M                                 | F                                 | M                                | F                                | M                                 | F                                 | M                               | F                               | M                               | F                               | M                                  | F                                  |
| Lebanon              | <0.1<br>(<0.1–0.1)                | <0.1<br>(<0.1–0.1)                | 5.0<br>(2.1–8.0)                 | 5.0<br>(2.1–8.0)                 | 14.9<br>(9.0–22.6)                | 14.9<br>(9.0–22.6)                | 20.3<br>(13.7–27.7)             | 20.3<br>(13.7–27.4)             | 0.1<br>(<0.1–0.2)               | 0.1<br>(<0.1–0.2)               | 14.0<br>(10.4–17.5)                | 14.0<br>(10.4–17.5)                |
| Libya                | <0.1<br>(<0.1–0.1)                | <0.1<br>(<0.1–0.1)                | 4.5<br>(1.9–7.4)                 | 4.5<br>(1.9–7.4)                 | 19.0<br>(11.0–29.3)               | 19.0<br>(11.0–29.3)               | 18.1<br>(11.7–24.7)             | 17.9<br>(11.7–24.2)             | 8.2<br>(4.7–12.0)               | 8.2<br>(4.7–12.0)               | 2.8<br>(<0.1–9.8)                  | 2.8<br>(<0.1–9.8)                  |
| Morocco              | 1.2<br>(0.4–2.5)                  | 1.2<br>(0.4–2.5)                  | 7.6<br>(3.2–12.2)                | 7.6<br>(3.2–12.2)                | 17.3<br>(10.8–24.8)               | 17.3<br>(10.8–24.8)               | 10.4<br>(6.1–15.1)              | 10.6<br>(6.3–15.0)              | 2.5<br>(1.6–3.4)                | 2.5<br>(1.6–3.4)                | 8.2<br>(4.8–11.8)                  | 8.2<br>(4.8–11.8)                  |
| Oman                 | 0.1<br>(<0.1–0.2)                 | 0.1<br>(<0.1–0.2)                 | 5.0<br>(2.0–8.2)                 | 5.0<br>(2.0–8.2)                 | 21.4<br>(12.7–31.3)               | 21.4<br>(12.7–31.3)               | 11.0<br>(6.5–15.8)              | 11.5<br>(6.9–16.8)              | 6.6<br>(<0.1–22.3)              | 6.6<br>(<0.1–22.3)              | 1.3<br>(<0.1–13.3)                 | 1.3<br>(<0.1–13.3)                 |
| Palestine            | 0.3<br>(0.1–0.6)                  | 0.3<br>(0.1–0.6)                  | 7.1<br>(3.0–11.4)                | 7.1<br>(3.0–11.4)                | 15.9<br>(9.5–24.7)                | 15.9<br>(9.5–24.7)                | 17.0<br>(11.1–23.0)             | 17.1<br>(10.9–22.9)             | 2.2<br>(0.9–4.0)                | 2.2<br>(0.9–4.0)                | 3.9<br>(<0.1–10.5)                 | 3.9<br>(<0.1–10.5)                 |
| Qatar                | <0.1<br>(<0.1–<0.1)               | <0.1<br>(<0.1–<0.1)               | 3.8<br>(1.5–6.3)                 | 3.8<br>(1.5–6.3)                 | 31.1<br>(22.0–41.1)               | 31.1<br>(22.0–41.1)               | 14.7<br>(9.1–20.7)              | 15.2<br>(9.5–21.3)              | 10.6<br>(3.7–19.5)              | 10.6<br>(3.7–19.5)              | 1.8<br>(<0.1–15.2)                 | 1.8<br>(<0.1–15.2)                 |
| Saudi Arabia         | 0.1<br>(<0.1–0.2)                 | 0.1<br>(<0.1–0.2)                 | 4.2<br>(1.7–6.7)                 | 4.2<br>(1.7–6.7)                 | 27.0<br>(18.4–37.3)               | 27.0<br>(18.4–37.3)               | 16.3<br>(10.5–22.4)             | 16.6<br>(10.9–22.3)             | 9.7<br>(5.9–14.1)               | 9.7<br>(5.9–14.1)               | 2.4<br>(<0.1–8.8)                  | 2.4<br>(<0.1–8.8)                  |
| Sudan                | 14.4<br>(7.1–24.8)                | 14.4<br>(7.1–24.8)                | 17.7<br>(7.9–26.7)               | 17.7<br>(7.9–26.7)               | 19.8<br>(11.5–30.1)               | 19.8<br>(11.5–30.1)               | 12.8<br>(8.5–17.7)              | 12.5<br>(8.3–17.2)              | 8.3<br>(3.6–15.7)               | 8.3<br>(3.6–15.7)               | 1.5<br>(<0.1–7.2)                  | 1.5<br>(<0.1–7.2)                  |
| Syrian Arab Republic | <0.1<br>(<0.1–0.1)                | <0.1<br>(<0.1–0.1)                | 4.9<br>(2.0–7.9)                 | 4.9<br>(2.0–7.9)                 | 15.8<br>(9.6–23.6)                | 15.8<br>(9.6–23.6)                | 15.3<br>(9.4–21.5)              | 15.3<br>(9.7–20.8)              | 4.4<br>(2.5–6.3)                | 4.4<br>(2.5–6.3)                | 7.7<br>(2.5–12.6)                  | 7.7<br>(2.5–12.6)                  |
| Tunisia              | <0.1<br>(<0.1–0.1)                | <0.1<br>(<0.1–0.1)                | 5.7<br>(2.4–9.2)                 | 5.7<br>(2.4–9.2)                 | 15.5<br>(8.9–24.1)                | 15.5<br>(8.9–24.1)                | 16.7<br>(10.6–23.2)             | 16.7<br>(10.7–22.9)             | 4.5<br>(2.3–6.7)                | 4.5<br>(2.3–6.7)                | 5.1<br>(<0.1–11.3)                 | 5.1<br>(<0.1–11.3)                 |
| Turkey               | 0.1<br>(<0.1–0.2)                 | 0.1<br>(<0.1–0.2)                 | 5.8<br>(2.4–9.3)                 | 5.8<br>(2.4–9.3)                 | 13.5<br>(8.4–20.4)                | 13.5<br>(8.4–20.4)                | 17.4<br>(10.9–23.8)             | 18.1<br>(11.5–24.8)             | 0.4<br>(0.1–0.7)                | 0.4<br>(0.1–0.7)                | 18.3<br>(13.7–23.4)                | 18.3<br>(13.7–23.4)                |
| United Arab Emirates | <0.1<br>(<0.1–<0.1)               | <0.1<br>(<0.1–<0.1)               | 3.8<br>(1.5–6.2)                 | 3.8<br>(1.5–6.2)                 | 21.1<br>(13.2–30.8)               | 21.1<br>(13.2–30.8)               | 15.0<br>(9.5–21.3)              | 15.6<br>(9.9–21.6)              | 8.4<br>(<0.1–25.0)              | 8.4<br>(<0.1–25.0)              | 1.9<br>(<0.1–18.2)                 | 1.9<br>(<0.1–18.2)                 |
| Yemen                | 14.7<br>(7.0–25.0)                | 14.7<br>(7.0–25.0)                | 13.5<br>(5.8–20.7)               | 13.5<br>(5.8–20.7)               | 16.2<br>(8.4–26.1)                | 16.2<br>(8.4–26.1)                | 15.6<br>(10.1–21.4)             | 15.6<br>(9.9–21.4)              | 5.5<br>(1.6–12.3)               | 5.5<br>(1.6–12.3)               | 0.9<br>(<0.1–5.1)                  | 0.9<br>(<0.1–5.1)                  |
| <b>South Asia</b>    | <b>21.1</b><br><b>(12.0–31.8)</b> | <b>20.5</b><br><b>(11.6–30.9)</b> | <b>12.7</b><br><b>(5.6–19.6)</b> | <b>12.9</b><br><b>(5.7–19.7)</b> | <b>22.0</b><br><b>(15.7–29.2)</b> | <b>23.4</b><br><b>(17.0–30.4)</b> | <b>9.2</b><br><b>(4.9–13.9)</b> | <b>9.7</b><br><b>(5.3–14.8)</b> | <b>8.0</b><br><b>(4.7–12.1)</b> | <b>7.8</b><br><b>(4.4–11.9)</b> | <b>2.9</b><br><b>(&lt;0.1–8.3)</b> | <b>2.6</b><br><b>(&lt;0.1–7.7)</b> |
| Bangladesh           | 25.8<br>(14.7–39.0)               | 25.8<br>(14.7–39.0)               | 18.1<br>(8.1–27.1)               | 18.1<br>(8.1–27.1)               | 18.3<br>(12.4–25.1)               | 18.3<br>(12.4–25.1)               | 10.0<br>(4.8–15.8)              | 10.0<br>(4.8–15.6)              | 5.9<br>(2.7–9.8)                | 5.9<br>(2.7–9.8)                | 1.3<br>(<0.1–4.8)                  | 1.3<br>(<0.1–4.8)                  |
| Bhutan               | 19.6<br>(10.0–31.3)               | 19.6<br>(10.0–31.3)               | 6.1<br>(2.5–9.8)                 | 6.1<br>(2.5–9.8)                 | 14.0<br>(9.2–20.5)                | 14.0<br>(9.2–20.5)                | 4.8<br>(2.6–7.4)                | 4.9<br>(2.6–7.5)                | <0.1<br>(<0.1–0.1)              | <0.1<br>(<0.1–0.1)              | 18.6<br>(11.8–26.9)                | 18.6<br>(11.8–26.9)                |
| India                | 20.1<br>(11.5–30.2)               | 19.2<br>(10.9–28.9)               | 11.9<br>(5.2–18.5)               | 12.1<br>(5.3–18.6)               | 24.1<br>(17.6–31.4)               | 25.4<br>(18.6–32.6)               | 9.5<br>(5.2–14.3)               | 9.9<br>(5.5–15.2)               | 7.6<br>(4.1–12.0)               | 7.9<br>(4.3–12.3)               | 2.2<br>(<0.1–7.2)                  | 2.2<br>(<0.1–7.4)                  |
| Nepal                | 26.5<br>(15.1–39.3)               | 26.5<br>(15.1–39.3)               | 11.3<br>(4.9–17.8)               | 11.3<br>(4.9–17.8)               | 20.7<br>(12.3–29.8)               | 20.7<br>(12.3–29.8)               | 7.0<br>(3.1–11.6)               | 7.1<br>(3.1–11.8)               | 1.4<br>(0.7–2.2)                | 1.4<br>(0.7–2.2)                | 13.0<br>(7.6–19.0)                 | 13.0<br>(7.6–19.0)                 |
| Pakistan             | 21.2<br>(11.2–33.0)               | 20.9<br>(11.1–32.5)               | 12.4<br>(5.3–19.2)               | 12.4<br>(5.3–19.2)               | 19.1<br>(12.5–26.8)               | 19.3<br>(12.8–27.1)               | 8.4<br>(4.4–12.6)               | 8.4<br>(4.4–12.7)               | 9.6<br>(5.9–15.6)               | 9.6<br>(5.8–15.5)               | 4.6<br>(<0.1–12.2)                 | 4.6<br>(<0.1–12.4)                 |

|                                               | Household air pollution   |                           | Handwashing              |                          | Ambient particulate matter |                           | Secondhand smoke          |                           | High temperature         |                           | Low temperature         |                         |
|-----------------------------------------------|---------------------------|---------------------------|--------------------------|--------------------------|----------------------------|---------------------------|---------------------------|---------------------------|--------------------------|---------------------------|-------------------------|-------------------------|
|                                               | M                         | F                         | M                        | F                        | M                          | F                         | M                         | F                         | M                        | F                         | M                       | F                       |
| <b>Southeast Asia, East Asia, and Oceania</b> | <b>13.5</b><br>(6.9–21.9) | <b>13.8</b><br>(7.1–22.4) | <b>6.3</b><br>(2.6–10.2) | <b>6.5</b><br>(2.7–10.3) | <b>12.1</b><br>(8.3–16.5)  | <b>11.3</b><br>(7.8–15.5) | <b>15.1</b><br>(9.3–21.1) | <b>14.8</b><br>(8.9–20.6) | <b>1.5</b><br>(<0.1–9.4) | <b>1.6</b><br>(<0.1–10.6) | <b>4.2</b><br>(2.5–6.0) | <b>3.5</b><br>(1.9–5.0) |
| East Asia                                     | 8.1<br>(3.5–14.8)         | 8.5<br>(3.8–15.5)         | 4.1<br>(1.7–6.7)         | 4.1<br>(1.7–6.6)         | 19.4<br>(13.8–25.9)        | 19.0<br>(13.3–25.3)       | 19.5<br>(12.9–26.6)       | 19.5<br>(12.7–26.3)       | 0.6<br>(<0.1–1.1)        | 0.6<br>(<0.1–1.1)         | 13.4<br>(8.4–18.0)      | 13.4<br>(8.4–18.2)      |
| China                                         | 7.6<br>(3.2–14.2)         | 7.8<br>(3.3–14.5)         | 4.2<br>(1.7–6.9)         | 4.2<br>(1.7–6.8)         | 19.7<br>(13.9–26.1)        | 19.3<br>(13.5–25.6)       | 19.6<br>(13.0–26.7)       | 19.7<br>(12.7–26.5)       | 0.6<br>(<0.1–1.1)        | 0.6<br>(<0.1–1.2)         | 13.3<br>(8.2–17.8)      | 13.2<br>(8.2–17.8)      |
| Democratic People's Republic of Korea         | 23.7<br>(12.8–36.8)       | 23.7<br>(12.8–36.8)       | 2.3<br>(0.9–3.7)         | 2.3<br>(0.9–3.7)         | 15.2<br>(9.5–21.8)         | 15.2<br>(9.5–21.8)        | 17.9<br>(11.5–25.1)       | 18.0<br>(11.7–24.9)       | 0.1<br>(<0.1–0.7)        | 0.1<br>(<0.1–0.7)         | 19.3<br>(11.7–29.7)     | 19.3<br>(11.7–29.7)     |
| Taiwan (Province of China)                    | 0.6<br>(0.1–1.6)          | 0.6<br>(0.1–1.6)          | 1.8<br>(0.7–3.0)         | 1.8<br>(0.7–3.0)         | 12.1<br>(7.5–17.9)         | 12.1<br>(7.5–17.9)        | 14.0<br>(8.5–19.8)        | 15.1<br>(9.6–20.9)        | 0.9<br>(0.2–2.3)         | 0.9<br>(0.2–2.3)          | 3.5<br>(<0.1–6.8)       | 3.5<br>(<0.1–6.8)       |
| Oceania                                       | 38.2<br>(23.6–51.1)       | 38.1<br>(23.9–51.2)       | 10.6<br>(4.5–16.9)       | 10.6<br>(4.5–16.8)       | 4.1<br>(1.1–10.8)          | 4.1<br>(1.1–10.8)         | 9.7<br>(4.6–15.5)         | 9.5<br>(4.6–15.2)         | 0.5<br>(<0.1–2.2)        | 0.5<br>(<0.1–2.3)         | 1.2<br>(<0.1–3.0)       | 1.2<br>(<0.1–2.9)       |
| Fiji                                          | 5.6<br>(1.7–12.4)         | 5.6<br>(1.7–12.4)         | 2.9<br>(1.2–4.8)         | 2.9<br>(1.2–4.8)         | 5.4<br>(1.5–13.1)          | 5.4<br>(1.5–13.1)         | 7.1<br>(3.1–11.9)         | 7.1<br>(3.2–11.9)         | 0.5<br>(<0.1–2.4)        | 0.5<br>(<0.1–2.4)         | <0.1<br>(<0.1–1.7)      | <0.1<br>(<0.1–1.7)      |
| Kiribati                                      | 28.4<br>(16.1–42.4)       | 28.4<br>(16.1–42.4)       | 6.5<br>(2.7–10.4)        | 6.5<br>(2.7–10.4)        | 3.4<br>(1.1–7.9)           | 3.4<br>(1.1–7.9)          | 12.5<br>(6.6–18.4)        | 12.1<br>(6.4–17.9)        | 0.9<br>(<0.1–5.0)        | 0.9<br>(<0.1–5.0)         | <0.1<br>(<0.1–0.1)      | <0.1<br>(<0.1–0.1)      |
| Marshall Islands                              | 9.7<br>(3.8–18.5)         | 9.7<br>(3.8–18.5)         | 4.5<br>(1.8–7.3)         | 4.5<br>(1.8–7.3)         | 4.2<br>(1.6–9.1)           | 4.2<br>(1.6–9.1)          | 9.9<br>(5.2–15.2)         | 10.1<br>(5.3–15.3)        | 0.2<br>(<0.1–11.3)       | 0.2<br>(<0.1–11.3)        | <0.1<br>(<0.1–0.1)      | <0.1<br>(<0.1–0.1)      |
| Micronesia (Federated States of)              | 8.6<br>(3.0–16.8)         | 8.6<br>(3.0–16.8)         | 3.9<br>(1.6–6.4)         | 3.9<br>(1.6–6.4)         | 5.0<br>(1.5–11.8)          | 5.0<br>(1.5–11.8)         | 8.1<br>(3.6–13.6)         | 8.1<br>(3.6–13.6)         | 0.2<br>(<0.1–11.3)       | 0.2<br>(<0.1–11.3)        | <0.1<br>(<0.1–0.2)      | <0.1<br>(<0.1–0.2)      |
| Nauru                                         | 0.7<br>(0.1–2.1)          | 0.7<br>(0.1–2.1)          | 3.1<br>(1.2–5.1)         | 3.1<br>(1.2–5.1)         | 2.0<br>(0.5–5.2)           | 2.0<br>(0.5–5.2)          | 8.8<br>(3.9–14.9)         | 8.6<br>(3.9–14.7)         | 2.4<br>(<0.1–31.1)       | 2.4<br>(<0.1–31.1)        | <0.1<br>(<0.1–0.3)      | <0.1<br>(<0.1–0.3)      |
| Palau                                         | <0.1<br>(<0.1–<0.1)       | <0.1<br>(<0.1–<0.1)       | 2.4<br>(0.9–3.9)         | 2.4<br>(0.9–3.9)         | 2.0<br>(<0.1–5.9)          | 2.0<br>(<0.1–5.9)         | 12.4<br>(6.9–18.8)        | 12.2<br>(6.8–18.1)        | 0.9<br>(<0.1–28.7)       | 0.9<br>(<0.1–28.7)        | <0.1<br>(<0.1–0.4)      | <0.1<br>(<0.1–0.4)      |
| Papua New Guinea                              | 42.2<br>(26.2–55.8)       | 42.2<br>(26.2–55.8)       | 12.2<br>(5.2–19.0)       | 12.2<br>(5.2–19.0)       | 4.1<br>(1.0–11.1)          | 4.1<br>(1.0–11.1)         | 9.8<br>(4.6–15.9)         | 9.6<br>(4.6–15.5)         | 0.4<br>(<0.1–1.9)        | 0.4<br>(<0.1–1.9)         | 1.6<br>(<0.1–3.7)       | 1.6<br>(<0.1–3.7)       |
| Samoa                                         | 18.4<br>(8.3–31.4)        | 18.4<br>(8.3–31.4)        | 2.2<br>(0.9–3.6)         | 2.2<br>(0.9–3.6)         | 4.9<br>(1.4–12.0)          | 4.9<br>(1.4–12.0)         | 14.8<br>(8.7–21.0)        | 14.7<br>(8.6–20.5)        | 0.4<br>(<0.1–2.2)        | 0.4<br>(<0.1–2.2)         | 0.1<br>(<0.1–1.4)       | 0.1<br>(<0.1–1.4)       |
| Solomon Islands                               | 42.7<br>(27.0–56.9)       | 42.7<br>(27.0–56.9)       | 4.9<br>(2.0–7.9)         | 4.9<br>(2.0–7.9)         | 3.4<br>(1.0–8.3)           | 3.4<br>(1.0–8.3)          | 10.3<br>(5.0–16.0)        | 10.3<br>(5.4–15.9)        | 0.5<br>(<0.1–3.3)        | 0.5<br>(<0.1–3.3)         | <0.1<br>(<0.1–0.5)      | <0.1<br>(<0.1–0.5)      |
| Tonga                                         | 8.7<br>(3.0–18.1)         | 8.7<br>(3.0–18.1)         | 3.3<br>(1.3–5.4)         | 3.3<br>(1.3–5.4)         | 5.2<br>(1.6–11.8)          | 5.2<br>(1.6–11.8)         | 11.8<br>(6.3–17.5)        | 11.8<br>(6.5–17.5)        | 1.2<br>(<0.1–3.0)        | 1.2<br>(<0.1–3.0)         | 0.2<br>(<0.1–2.6)       | 0.2<br>(<0.1–2.6)       |
| Tuvalu                                        | 2.3<br>(0.5–5.3)          | 2.3<br>(0.5–5.3)          | 3.7<br>(1.5–6.1)         | 3.7<br>(1.5–6.1)         | 2.5<br>(0.9–5.6)           | 2.5<br>(0.9–5.6)          | 10.4<br>(5.2–16.2)        | 10.3<br>(5.1–15.9)        | 1.4<br>(<0.1–12.8)       | 1.4<br>(<0.1–12.8)        | 0.1<br>(<0.1–0.7)       | 0.1<br>(<0.1–0.7)       |
| Vanuatu                                       | 33.3<br>(19.6–48.5)       | 33.3<br>(19.6–48.5)       | 10.0<br>(4.3–15.7)       | 10.0<br>(4.3–15.7)       | 4.4<br>(1.3–10.3)          | 4.4<br>(1.3–10.3)         | 6.7<br>(2.8–11.2)         | 6.9<br>(2.9–11.8)         | 0.4<br>(<0.1–2.1)        | 0.4<br>(<0.1–2.1)         | <0.1<br>(<0.1–1.8)      | <0.1<br>(<0.1–1.8)      |
| Southeast Asia                                | 14.6<br>(7.3–23.9)        | 14.6<br>(7.3–24.0)        | 7.1<br>(2.9–11.3)        | 7.1<br>(2.9–11.3)        | 9.0<br>(5.9–12.7)          | 8.9<br>(5.9–12.6)         | 13.4<br>(7.6–19.3)        | 13.4<br>(7.8–19.5)        | 2.0<br>(<0.1–13.9)       | 2.0<br>(<0.1–14.5)        | 0.1<br>(<0.1–1.0)       | 0.1<br>(<0.1–0.9)       |

|                                  | Household air pollution           |                                   | Handwashing                       |                                   | Ambient particulate matter      |                                 | Secondhand smoke               |                                | High temperature                |                                 | Low temperature                    |                                    |
|----------------------------------|-----------------------------------|-----------------------------------|-----------------------------------|-----------------------------------|---------------------------------|---------------------------------|--------------------------------|--------------------------------|---------------------------------|---------------------------------|------------------------------------|------------------------------------|
|                                  | M                                 | F                                 | M                                 | F                                 | M                               | F                               | M                              | F                              | M                               | F                               | M                                  | F                                  |
| Cambodia                         | 31.5<br>(17.9–46.3)               | 31.5<br>(17.9–46.3)               | 8.6<br>(3.5–13.5)                 | 8.6<br>(3.5–13.5)                 | 7.3<br>(3.9–11.8)               | 7.3<br>(3.9–11.8)               | 15.6<br>(9.9–21.8)             | 15.6<br>(9.8–21.4)             | 2.7<br>(<0.1–21.8)              | 2.7<br>(<0.1–21.8)              | <0.1<br>(<0.1–0.3)                 | <0.1<br>(<0.1–0.3)                 |
| Indonesia                        | 8.0<br>(3.3–15.9)                 | 8.4<br>(3.4–16.4)                 | 7.6<br>(3.1–12.1)                 | 7.8<br>(3.2–12.3)                 | 9.4<br>(6.0–13.8)               | 9.2<br>(5.9–13.4)               | 15.4<br>(8.8–21.9)             | 15.6<br>(8.8–22.4)             | 0.3<br>(<0.1–3.8)               | 0.4<br>(<0.1–3.8)               | <0.1<br>(<0.1–1.0)                 | <0.1<br>(<0.1–0.9)                 |
| Lao People's Democratic Republic | 33.9<br>(20.0–49.2)               | 33.9<br>(20.0–49.2)               | 10.2<br>(4.3–15.9)                | 10.2<br>(4.3–15.9)                | 6.7<br>(3.8–10.5)               | 6.7<br>(3.8–10.5)               | 12.9<br>(7.1–18.9)             | 13.0<br>(7.3–19.2)             | 1.8<br>(0.6–3.9)                | 1.8<br>(0.6–3.9)                | <0.1<br>(<0.1–2.9)                 | <0.1<br>(<0.1–2.9)                 |
| Malaysia                         | 0.1<br>(<0.1–0.3)                 | 0.1<br>(<0.1–0.3)                 | 2.0<br>(0.8–3.2)                  | 2.0<br>(0.8–3.2)                  | 8.3<br>(4.7–13.2)               | 8.3<br>(4.7–13.2)               | 12.9<br>(7.3–19.0)             | 13.1<br>(7.4–18.9)             | 0.8<br>(<0.1–3.9)               | 0.8<br>(<0.1–3.9)               | <0.1<br>(<0.1–0.8)                 | <0.1<br>(<0.1–0.8)                 |
| Maldives                         | 2.8<br>(0.9–6.8)                  | 2.8<br>(0.9–6.8)                  | 8.1<br>(3.5–13.0)                 | 8.1<br>(3.5–13.0)                 | 5.2<br>(2.9–8.5)                | 5.2<br>(2.9–8.5)                | 14.9<br>(8.8–21.5)             | 14.8<br>(8.5–21.2)             | 0.4<br>(<0.1–11.4)              | 0.4<br>(<0.1–11.4)              | <0.1<br>(<0.1–0.1)                 | <0.1<br>(<0.1–0.1)                 |
| Mauritius                        | 0.2<br>(<0.1–0.5)                 | 0.2<br>(<0.1–0.5)                 | 1.1<br>(0.4–1.8)                  | 1.1<br>(0.4–1.8)                  | 7.3<br>(3.1–13.8)               | 7.3<br>(3.1–13.8)               | 11.6<br>(6.3–17.3)             | 11.8<br>(6.4–17.6)             | 0.7<br>(<0.1–3.5)               | 0.7<br>(<0.1–3.5)               | <0.1<br>(<0.1–5.4)                 | <0.1<br>(<0.1–5.4)                 |
| Myanmar                          | 24.3<br>(12.8–38.5)               | 24.3<br>(12.8–38.5)               | 11.1<br>(4.7–17.5)                | 11.1<br>(4.7–17.5)                | 10.9<br>(7.1–15.4)              | 10.9<br>(7.1–15.4)              | 8.4<br>(3.7–14.1)              | 8.7<br>(3.9–14.3)              | 2.9<br>(1.3–5.3)                | 2.9<br>(1.3–5.3)                | 1.9<br>(<0.1–4.3)                  | 1.9<br>(<0.1–4.3)                  |
| Philippines                      | 15.3<br>(7.3–25.6)                | 15.2<br>(7.2–25.6)                | 6.4<br>(2.6–10.1)                 | 6.4<br>(2.6–10.1)                 | 8.6<br>(5.7–12.1)               | 8.6<br>(5.6–12.2)               | 13.1<br>(7.3–19.2)             | 13.3<br>(7.6–19.1)             | 2.4<br>(<0.1–23.2)              | 2.4<br>(<0.1–22.7)              | 0.2<br>(<0.1–0.8)                  | 0.2<br>(<0.1–0.8)                  |
| Seychelles                       | 0.1<br>(<0.1–0.2)                 | 0.1<br>(<0.1–0.2)                 | 3.9<br>(1.6–6.3)                  | 3.9<br>(1.6–6.3)                  | 7.7<br>(3.3–14.3)               | 7.7<br>(3.3–14.3)               | 11.1<br>(6.1–16.5)             | 12.0<br>(6.7–17.4)             | 1.0<br>(<0.1–3.8)               | 1.0<br>(<0.1–3.8)               | 0.2<br>(<0.1–1.3)                  | 0.2<br>(<0.1–1.3)                  |
| Sri Lanka                        | 9.8<br>(3.4–20.2)                 | 9.8<br>(3.4–20.2)                 | 5.0<br>(2.0–8.1)                  | 5.0<br>(2.0–8.1)                  | 9.7<br>(5.7–15.1)               | 9.7<br>(5.7–15.1)               | 6.1<br>(2.4–11.0)              | 6.5<br>(2.7–11.2)              | 1.2<br>(<0.1–13.3)              | 1.2<br>(<0.1–13.3)              | <0.1<br>(<0.1–0.8)                 | <0.1<br>(<0.1–0.8)                 |
| Thailand                         | 3.5<br>(1.1–7.9)                  | 3.5<br>(1.1–7.9)                  | 7.5<br>(3.1–12.1)                 | 7.5<br>(3.1–12.1)                 | 13.7<br>(8.8–19.8)              | 13.7<br>(8.8–19.8)              | 10.1<br>(5.6–15.1)             | 10.0<br>(5.4–15.0)             | 2.9<br>(<0.1–10.6)              | 2.9<br>(<0.1–10.6)              | <0.1<br>(<0.1–1.0)                 | <0.1<br>(<0.1–1.0)                 |
| Timor-Leste                      | 30.0<br>(16.7–45.1)               | 30.0<br>(16.7–45.1)               | 6.6<br>(2.7–10.6)                 | 6.6<br>(2.7–10.6)                 | 5.6<br>(2.6–10.1)               | 5.6<br>(2.6–10.1)               | 10.7<br>(5.2–16.8)             | 10.9<br>(5.1–17.4)             | 0.5<br>(<0.1–2.1)               | 0.5<br>(<0.1–2.1)               | <0.1<br>(<0.1–1.7)                 | <0.1<br>(<0.1–1.7)                 |
| Viet Nam                         | 9.8<br>(3.8–18.3)                 | 9.8<br>(3.8–18.3)                 | 8.6<br>(3.6–13.6)                 | 8.6<br>(3.6–13.6)                 | 9.7<br>(6.3–14.1)               | 9.7<br>(6.3–14.1)               | 15.1<br>(9.1–21.2)             | 15.2<br>(8.9–21.5)             | 2.7<br>(0.9–5.9)                | 2.7<br>(0.9–5.9)                | 0.2<br>(<0.1–3.2)                  | 0.2<br>(<0.1–3.2)                  |
| <b>Sub-Saharan Africa</b>        | <b>40.0</b><br><b>(27.6–52.2)</b> | <b>40.7</b><br><b>(28.1–52.9)</b> | <b>22.1</b><br><b>(10.1–32.5)</b> | <b>22.1</b><br><b>(10.2–32.5)</b> | <b>9.2</b><br><b>(5.2–14.4)</b> | <b>8.9</b><br><b>(5.0–14.0)</b> | <b>3.7</b><br><b>(1.7–6.1)</b> | <b>3.8</b><br><b>(1.7–6.1)</b> | <b>3.9</b><br><b>(0.7–11.7)</b> | <b>3.7</b><br><b>(0.7–10.9)</b> | <b>1.1</b><br><b>(&lt;0.1–3.1)</b> | <b>1.0</b><br><b>(&lt;0.1–3.1)</b> |
| Central Sub-Saharan Africa       | 36.5<br>(23.1–49.3)               | 37.5<br>(23.5–49.8)               | 22.6<br>(10.4–33.2)               | 22.7<br>(10.5–33.2)               | 8.8<br>(4.1–15.1)               | 8.6<br>(3.9–14.9)               | 3.0<br>(1.4–5.2)               | 2.7<br>(1.2–4.9)               | 1.6<br>(0.4–3.4)                | 1.5<br>(0.3–3.4)                | <0.1<br>(<0.1–2.4)                 | <0.1<br>(<0.1–2.4)                 |
| Angola                           | 17.9<br>(9.0–28.8)                | 17.9<br>(9.0–28.8)                | 22.3<br>(10.2–32.8)               | 22.3<br>(10.2–32.8)               | 11.0<br>(5.7–18.3)              | 11.0<br>(5.7–18.3)              | 7.4<br>(4.0–11.6)              | 7.2<br>(4.0–11.0)              | 1.7<br>(0.5–3.8)                | 1.7<br>(0.5–3.8)                | <0.1<br>(<0.1–2.9)                 | <0.1<br>(<0.1–2.9)                 |
| Central African Republic         | 49.7<br>(35.1–62.3)               | 49.7<br>(35.1–62.3)               | 21.6<br>(9.9–31.8)                | 21.6<br>(9.9–31.8)                | 6.5<br>(2.1–14.1)               | 6.5<br>(2.1–14.1)               | 3.4<br>(1.5–5.6)               | 3.4<br>(1.6–5.9)               | 3.8<br>(1.5–7.0)                | 3.8<br>(1.5–7.0)                | <0.1<br>(<0.1–1.2)                 | <0.1<br>(<0.1–1.2)                 |
| Congo                            | 14.7<br>(7.0–26.0)                | 14.7<br>(7.0–26.0)                | 21.0<br>(9.5–31.0)                | 21.0<br>(9.5–31.0)                | 15.7<br>(8.4–26.9)              | 15.7<br>(8.4–26.9)              | 4.3<br>(1.9–7.1)               | 4.2<br>(2.0–7.0)               | 0.9<br>(<0.1–3.0)               | 0.9<br>(<0.1–3.0)               | <0.1<br>(<0.1–1.9)                 | <0.1<br>(<0.1–1.9)                 |
| Democratic Republic of the Congo | 42.7<br>(27.5–55.5)               | 42.7<br>(27.5–55.5)               | 23.0<br>(10.6–33.7)               | 23.0<br>(10.6–33.7)               | 7.9<br>(3.2–14.5)               | 7.9<br>(3.2–14.5)               | 1.4<br>(0.4–2.9)               | 1.4<br>(0.4–2.9)               | 1.3<br>(0.1–3.1)                | 1.3<br>(0.1–3.1)                | 0.1<br>(<0.1–2.6)                  | 0.1<br>(<0.1–2.6)                  |



|                             | Household air pollution |                     | Handwashing         |                     | Ambient particulate matter |                     | Secondhand smoke  |                   | High temperature   |                    | Low temperature    |                    |
|-----------------------------|-------------------------|---------------------|---------------------|---------------------|----------------------------|---------------------|-------------------|-------------------|--------------------|--------------------|--------------------|--------------------|
|                             | M                       | F                   | M                   | F                   | M                          | F                   | M                 | F                 | M                  | F                  | M                  | F                  |
| Equatorial Guinea           | 4.2<br>(1.4–9.1)        | 4.2<br>(1.4–9.1)    | 19.9<br>(9.0–29.7)  | 19.9<br>(9.0–29.7)  | 20.2<br>(10.1–33.3)        | 20.2<br>(10.1–33.3) | 3.9<br>(1.6–6.8)  | 4.0<br>(1.6–7.4)  | 0.4<br>(<0.1–1.3)  | 0.4<br>(<0.1–1.3)  | <0.1<br>(<0.1–2.4) | <0.1<br>(<0.1–2.4) |
| Gabon                       | 1.6<br>(0.5–3.3)        | 1.6<br>(0.5–3.3)    | 16.9<br>(7.4–25.6)  | 16.9<br>(7.4–25.6)  | 17.7<br>(9.2–29.9)         | 17.7<br>(9.2–29.9)  | 4.5<br>(2.0–7.8)  | 4.6<br>(2.1–7.8)  | 0.7<br>(<0.1–2.6)  | 0.7<br>(<0.1–2.6)  | <0.1<br>(<0.1–1.5) | <0.1<br>(<0.1–1.5) |
| Eastern Sub-Saharan Africa  | 45.2<br>(31.7–58.1)     | 45.3<br>(31.2–58.2) | 22.6<br>(10.4–33.2) | 22.6<br>(10.4–33.2) | 5.8<br>(2.9–9.8)           | 5.7<br>(2.9–9.6)    | 3.5<br>(1.5–6.0)  | 3.5<br>(1.5–6.2)  | 2.1<br>(0.4–5.8)   | 2.0<br>(0.4–5.5)   | 1.2<br>(<0.1–3.7)  | 1.1<br>(<0.1–3.6)  |
| Burundi                     | 51.0<br>(37.0–63.4)     | 51.0<br>(37.0–63.4) | 22.9<br>(10.6–33.7) | 22.9<br>(10.6–33.7) | 4.8<br>(1.5–10.8)          | 4.8<br>(1.5–10.8)   | 2.4<br>(0.9–4.5)  | 2.3<br>(0.8–4.4)  | <0.1<br>(<0.1–0.3) | <0.1<br>(<0.1–0.3) | <0.1<br>(<0.1–6.1) | <0.1<br>(<0.1–6.1) |
| Comoros                     | 34.0<br>(20.0–49.0)     | 34.0<br>(20.0–49.0) | 21.0<br>(9.6–31.1)  | 21.0<br>(9.6–31.1)  | 5.5<br>(2.9–9.1)           | 5.5<br>(2.9–9.1)    | 5.2<br>(2.3–8.6)  | 5.2<br>(2.4–8.5)  | 0.7<br>(<0.1–2.9)  | 0.7<br>(<0.1–2.9)  | 0.2<br>(<0.1–2.9)  | 0.2<br>(<0.1–2.9)  |
| Djibouti                    | 8.3<br>(3.4–16.2)       | 8.3<br>(3.4–16.2)   | 21.6<br>(9.9–32.0)  | 21.6<br>(9.9–32.0)  | 17.9<br>(8.6–31.1)         | 17.9<br>(8.6–31.1)  | 8.6<br>(3.9–14.2) | 8.5<br>(3.8–13.9) | 5.9<br>(<0.1–30.0) | 5.9<br>(<0.1–30.0) | 0.2<br>(<0.1–5.2)  | 0.2<br>(<0.1–5.2)  |
| Eritrea                     | 33.4<br>(19.2–46.3)     | 33.4<br>(19.2–46.3) | 22.6<br>(10.4–33.1) | 22.6<br>(10.4–33.1) | 11.3<br>(5.0–20.0)         | 11.3<br>(5.0–20.0)  | 4.0<br>(1.9–6.4)  | 3.9<br>(2.0–6.3)  | 4.5<br>(<0.1–22.1) | 4.5<br>(<0.1–22.1) | 0.1<br>(<0.1–2.5)  | 0.1<br>(<0.1–2.5)  |
| Ethiopia                    | 49.0<br>(35.6–61.0)     | 49.0<br>(35.4–60.9) | 23.2<br>(10.7–33.9) | 23.2<br>(10.7–33.9) | 5.5<br>(2.2–10.7)          | 5.5<br>(2.2–10.7)   | 1.4<br>(0.5–2.7)  | 1.4<br>(0.5–2.6)  | 3.6<br>(0.6–11.7)  | 3.7<br>(0.7–11.9)  | 4.1<br>(2.5–6.0)   | 4.0<br>(2.5–5.9)   |
| Kenya                       | 34.8<br>(22.9–47.4)     | 35.2<br>(22.6–47.7) | 22.3<br>(10.3–33.0) | 22.4<br>(10.3–33.0) | 6.5<br>(3.7–10.6)          | 6.4<br>(3.6–10.6)   | 3.9<br>(1.7–6.7)  | 4.0<br>(1.7–7.0)  | 3.8<br>(0.3–15.4)  | 3.9<br>(0.3–15.2)  | 2.7<br>(1.2–4.7)   | 2.6<br>(1.1–4.5)   |
| Madagascar                  | 44.4<br>(28.7–58.2)     | 44.4<br>(28.7–58.2) | 22.4<br>(10.3–33.0) | 22.4<br>(10.3–33.0) | 4.4<br>(2.1–8.0)           | 4.4<br>(2.1–8.0)    | 3.5<br>(1.1–6.7)  | 3.5<br>(1.1–6.9)  | 0.8<br>(<0.1–2.4)  | 0.8<br>(<0.1–2.4)  | 1.0<br>(<0.1–3.8)  | 1.0<br>(<0.1–3.8)  |
| Malawi                      | 46.6<br>(30.9–59.0)     | 46.6<br>(30.9–59.0) | 22.6<br>(10.4–33.3) | 22.6<br>(10.4–33.3) | 4.8<br>(2.0–9.0)           | 4.8<br>(2.0–9.0)    | 3.5<br>(1.4–6.1)  | 3.5<br>(1.5–6.2)  | 0.5<br>(<0.1–1.9)  | 0.5<br>(<0.1–1.9)  | 0.2<br>(<0.1–4.4)  | 0.2<br>(<0.1–4.4)  |
| Mozambique                  | 50.2<br>(35.8–61.8)     | 50.2<br>(35.8–61.8) | 22.2<br>(10.2–32.7) | 22.2<br>(10.2–32.7) | 3.6<br>(1.4–7.0)           | 3.6<br>(1.4–7.0)    | 3.7<br>(1.2–6.9)  | 3.6<br>(1.2–6.8)  | 2.4<br>(1.0–4.4)   | 2.4<br>(1.0–4.4)   | 0.2<br>(<0.1–3.3)  | 0.2<br>(<0.1–3.3)  |
| Rwanda                      | 39.6<br>(24.7–54.3)     | 39.6<br>(24.7–54.3) | 23.2<br>(10.7–34.0) | 23.2<br>(10.7–34.0) | 9.1<br>(4.0–16.8)          | 9.1<br>(4.0–16.8)   | 4.7<br>(2.3–7.4)  | 4.7<br>(2.3–7.3)  | <0.1<br>(<0.1–0.1) | <0.1<br>(<0.1–0.1) | 2.0<br>(<0.1–7.5)  | 2.0<br>(<0.1–7.5)  |
| Somalia                     | 60.2<br>(46.1–83.5)     | 60.2<br>(46.1–83.5) | 22.7<br>(10.5–33.4) | 22.7<br>(10.5–33.4) | 1.7<br>(0.3–5.2)           | 1.7<br>(0.3–5.2)    | 3.5<br>(1.4–6.2)  | 3.5<br>(1.4–6.2)  | 2.3<br>(<0.1–15.8) | 2.3<br>(<0.1–15.8) | 0.1<br>(<0.1–1.3)  | 0.1<br>(<0.1–1.3)  |
| South Sudan                 | 44.2<br>(28.5–57.1)     | 44.2<br>(28.5–57.1) | 22.9<br>(10.6–33.6) | 22.9<br>(10.6–33.6) | 7.9<br>(3.5–14.5)          | 7.9<br>(3.5–14.5)   | 3.7<br>(1.6–6.3)  | 3.6<br>(1.6–6.2)  | 5.9<br>(<0.1–23.1) | 5.9<br>(<0.1–23.1) | <0.1<br>(<0.1–0.9) | <0.1<br>(<0.1–0.9) |
| Uganda                      | 41.9<br>(26.7–55.2)     | 41.9<br>(26.7–55.2) | 22.1<br>(10.1–32.5) | 22.1<br>(10.1–32.5) | 8.2<br>(3.9–13.7)          | 8.2<br>(3.9–13.7)   | 3.3<br>(1.4–5.9)  | 3.3<br>(1.3–5.8)  | 1.1<br>(0.2–2.9)   | 1.1<br>(0.2–2.9)   | <0.1<br>(<0.1–2.3) | <0.1<br>(<0.1–2.3) |
| United Republic of Tanzania | 41.4<br>(26.1–55.9)     | 41.4<br>(26.1–55.9) | 22.5<br>(10.4–33.2) | 22.5<br>(10.4–33.2) | 6.4<br>(3.4–10.5)          | 6.4<br>(3.4–10.5)   | 6.3<br>(3.0–10.2) | 6.1<br>(2.9–9.9)  | 0.9<br>(0.1–2.7)   | 0.9<br>(0.1–2.7)   | 0.1<br>(<0.1–3.5)  | 0.1<br>(<0.1–3.5)  |
| Zambia                      | 28.3<br>(15.9–42.9)     | 28.3<br>(15.9–42.9) | 21.3<br>(9.7–31.5)  | 21.3<br>(9.7–31.5)  | 9.0<br>(5.2–14.6)          | 9.0<br>(5.2–14.6)   | 4.5<br>(1.3–9.1)  | 4.4<br>(1.4–8.5)  | 1.2<br>(0.3–3.5)   | 1.2<br>(0.3–3.5)   | <0.1<br>(<0.1–5.0) | <0.1<br>(<0.1–5.0) |
| Southern Sub-Saharan Africa | 13.8<br>(7.3–21.9)      | 12.1<br>(6.3–19.4)  | 17.5<br>(7.8–26.2)  | 17.0<br>(7.6–25.4)  | 11.4<br>(7.4–16.8)         | 12.0<br>(7.8–17.3)  | 7.3<br>(3.6–11.2) | 7.5<br>(3.7–11.8) | 1.2<br>(0.5–2.5)   | 1.2<br>(0.5–2.4)   | 6.1<br>(3.3–9.1)   | 6.4<br>(3.6–9.1)   |

|                            | Household air pollution |                     | Handwashing         |                     | Ambient particulate matter |                     | Secondhand smoke   |                    | High temperature    |                     | Low temperature     |                     |
|----------------------------|-------------------------|---------------------|---------------------|---------------------|----------------------------|---------------------|--------------------|--------------------|---------------------|---------------------|---------------------|---------------------|
|                            | M                       | F                   | M                   | F                   | M                          | F                   | M                  | F                  | M                   | F                   | M                   | F                   |
| Botswana                   | 8.4<br>(3.2–16.7)       | 8.4<br>(3.2–16.7)   | 17.0<br>(7.5–25.6)  | 17.0<br>(7.5–25.6)  | 11.8<br>(7.0–18.1)         | 11.8<br>(7.0–18.1)  | 8.6<br>(4.2–13.5)  | 8.6<br>(4.2–13.8)  | 4.0<br>(1.5–7.7)    | 4.0<br>(1.5–7.7)    | 0.9<br>(<0.1–7.0)   | 0.9<br>(<0.1–7.0)   |
| Eswatini                   | 15.4<br>(7.0–27.1)      | 15.4<br>(7.0–27.1)  | 16.5<br>(7.4–25.0)  | 16.5<br>(7.4–25.0)  | 10.2<br>(6.1–15.5)         | 10.2<br>(6.1–15.5)  | 2.5<br>(1.0–4.6)   | 2.5<br>(1.0–4.7)   | 0.4<br>(<0.1–1.2)   | 0.4<br>(<0.1–1.2)   | 3.3<br>(<0.1–8.1)   | 3.3<br>(<0.1–8.1)   |
| Lesotho                    | 21.5<br>(11.2–34.2)     | 21.5<br>(11.2–34.2) | 23.1<br>(10.7–33.9) | 23.1<br>(10.7–33.9) | 10.4<br>(6.1–16.4)         | 10.4<br>(6.1–16.4)  | 10.4<br>(5.8–15.1) | 10.4<br>(5.9–15.0) | <0.1<br>(<0.1–<0.1) | <0.1<br>(<0.1–<0.1) | 21.7<br>(15.2–28.4) | 21.7<br>(15.2–28.4) |
| Namibia                    | 11.7<br>(4.8–21.6)      | 11.7<br>(4.8–21.6)  | 14.3<br>(6.2–22.0)  | 14.3<br>(6.2–22.0)  | 11.1<br>(6.3–17.3)         | 11.1<br>(6.3–17.3)  | 4.4<br>(1.7–8.1)   | 4.5<br>(1.7–8.4)   | 3.2<br>(1.3–6.0)    | 3.2<br>(1.3–6.0)    | 1.3<br>(<0.1–6.0)   | 1.3<br>(<0.1–6.0)   |
| South Africa               | 2.9<br>(1.1–6.0)        | 2.9<br>(1.0–6.0)    | 14.7<br>(6.4–22.1)  | 14.6<br>(6.4–22.1)  | 14.6<br>(9.2–21.3)         | 14.7<br>(9.3–21.4)  | 7.1<br>(3.2–11.8)  | 7.5<br>(3.5–12.4)  | 0.6<br>(0.3–1.7)    | 0.6<br>(0.2–1.7)    | 8.8<br>(6.7–11.3)   | 8.9<br>(6.7–11.2)   |
| Zimbabwe                   | 28.7<br>(16.2–43.3)     | 28.7<br>(16.2–43.3) | 20.9<br>(9.6–31.0)  | 20.9<br>(9.6–31.0)  | 7.2<br>(4.0–11.5)          | 7.2<br>(4.0–11.5)   | 7.4<br>(4.0–11.2)  | 7.5<br>(4.1–11.5)  | 1.7<br>(0.7–3.8)    | 1.7<br>(0.7–3.8)    | 0.7<br>(<0.1–5.1)   | 0.7<br>(<0.1–5.1)   |
| Western Sub-Saharan Africa | 38.7<br>(26.8–51.1)     | 40.2<br>(27.9–53.1) | 21.9<br>(10.1–32.2) | 21.9<br>(10.1–32.2) | 12.4<br>(6.9–19.9)         | 11.8<br>(6.3–19.3)  | 3.8<br>(1.9–5.9)   | 4.0<br>(2.0–6.2)   | 6.5<br>(0.9–21.0)   | 6.3<br>(0.8–20.0)   | 0.8<br>(<0.1–3.5)   | 0.8<br>(<0.1–4.0)   |
| Benin                      | 41.8<br>(27.0–55.1)     | 41.8<br>(27.0–55.1) | 22.1<br>(10.1–32.6) | 22.1<br>(10.1–32.6) | 9.7<br>(4.3–16.9)          | 9.7<br>(4.3–16.9)   | 3.8<br>(1.8–6.0)   | 3.9<br>(1.9–6.3)   | 3.3<br>(<0.1–18.5)  | 3.3<br>(<0.1–18.5)  | <0.1<br>(<0.1–1.2)  | <0.1<br>(<0.1–1.2)  |
| Burkina Faso               | 49.2<br>(35.7–63.0)     | 49.2<br>(35.7–63.0) | 22.2<br>(10.2–32.7) | 22.2<br>(10.2–32.7) | 6.9<br>(2.2–14.9)          | 6.9<br>(2.2–14.9)   | 3.7<br>(1.5–6.3)   | 3.7<br>(1.6–6.5)   | 4.6<br>(<0.1–34.1)  | 4.6<br>(<0.1–34.1)  | <0.1<br>(<0.1–3.1)  | <0.1<br>(<0.1–3.1)  |
| Cabo Verde                 | 7.1<br>(3.2–13.4)       | 7.1<br>(3.2–13.4)   | 19.0<br>(8.5–28.3)  | 19.0<br>(8.5–28.3)  | 21.3<br>(13.3–31.2)        | 21.3<br>(13.3–31.2) | 4.0<br>(1.8–6.9)   | 4.1<br>(1.9–6.9)   | 0.2<br>(<0.1–1.1)   | 0.2<br>(<0.1–1.1)   | <0.1<br>(<0.1–6.3)  | <0.1<br>(<0.1–6.3)  |
| Cameroon                   | 23.4<br>(12.7–36.0)     | 23.4<br>(12.7–36.0) | 21.8<br>(10.0–32.1) | 21.8<br>(10.0–32.1) | 19.3<br>(11.9–28.0)        | 19.3<br>(11.9–28.0) | 3.7<br>(1.8–6.0)   | 3.9<br>(1.9–6.3)   | 2.0<br>(0.1–7.1)    | 2.0<br>(0.1–7.1)    | <0.1<br>(<0.1–1.6)  | <0.1<br>(<0.1–1.6)  |
| Chad                       | 50.0<br>(36.3–64.4)     | 50.0<br>(36.3–64.4) | 22.3<br>(10.2–32.8) | 22.3<br>(10.2–32.8) | 6.9<br>(2.2–15.5)          | 6.9<br>(2.2–15.5)   | 4.6<br>(2.1–7.6)   | 4.7<br>(2.1–7.9)   | 7.0<br>(0.4–22.9)   | 7.0<br>(0.4–22.9)   | 1.3<br>(<0.1–7.7)   | 1.3<br>(<0.1–7.7)   |
| Côte d'Ivoire              | 33.9<br>(20.2–47.8)     | 33.9<br>(20.2–47.8) | 20.8<br>(9.5–31.0)  | 20.8<br>(9.5–31.0)  | 13.8<br>(7.0–23.9)         | 13.8<br>(7.0–23.9)  | 6.9<br>(3.7–10.9)  | 6.9<br>(3.6–10.4)  | 1.6<br>(<0.1–5.7)   | 1.6<br>(<0.1–5.7)   | 0.2<br>(<0.1–1.2)   | 0.2<br>(<0.1–1.2)   |
| Gambia                     | 39.3<br>(24.8–52.6)     | 39.3<br>(24.8–52.6) | 21.9<br>(10.1–32.3) | 21.9<br>(10.1–32.3) | 12.4<br>(5.9–21.0)         | 12.4<br>(5.9–21.0)  | 7.3<br>(3.8–11.3)  | 7.3<br>(3.9–11.2)  | 2.2<br>(<0.1–20.9)  | 2.2<br>(<0.1–20.9)  | 0.1<br>(<0.1–1.5)   | 0.1<br>(<0.1–1.5)   |
| Ghana                      | 17.6<br>(8.8–30.1)      | 17.6<br>(8.8–30.1)  | 22.3<br>(10.3–32.8) | 22.3<br>(10.3–32.8) | 19.1<br>(12.0–28.9)        | 19.1<br>(12.0–28.9) | 2.2<br>(1.0–3.6)   | 2.1<br>(1.0–3.5)   | 2.9<br>(<0.1–18.5)  | 2.9<br>(<0.1–18.5)  | <0.1<br>(<0.1–0.7)  | <0.1<br>(<0.1–0.7)  |
| Guinea                     | 46.9<br>(32.2–59.1)     | 46.9<br>(32.2–59.1) | 22.3<br>(10.3–32.8) | 22.3<br>(10.3–32.8) | 8.3<br>(3.2–16.4)          | 8.3<br>(3.2–16.4)   | 5.3<br>(2.6–8.7)   | 5.2<br>(2.6–8.2)   | 2.7<br>(0.7–7.1)    | 2.7<br>(0.7–7.1)    | 0.1<br>(<0.1–1.3)   | 0.1<br>(<0.1–1.3)   |
| Guinea-Bissau              | 44.7<br>(29.9–57.5)     | 44.7<br>(29.9–57.5) | 22.3<br>(10.3–32.8) | 22.3<br>(10.3–32.8) | 9.5<br>(3.9–17.8)          | 9.5<br>(3.9–17.8)   | 5.0<br>(2.4–8.0)   | 5.0<br>(2.4–7.7)   | 2.2<br>(<0.1–22.7)  | 2.2<br>(<0.1–22.7)  | <0.1<br>(<0.1–1.3)  | <0.1<br>(<0.1–1.3)  |
| Liberia                    | 42.5<br>(27.8–55.2)     | 42.5<br>(27.8–55.2) | 23.3<br>(10.8–34.1) | 23.3<br>(10.8–34.1) | 10.1<br>(4.5–17.9)         | 10.1<br>(4.5–17.9)  | 2.7<br>(1.1–4.7)   | 2.7<br>(1.2–4.6)   | 0.9<br>(<0.1–3.3)   | 0.9<br>(<0.1–3.3)   | 0.1<br>(<0.1–2.0)   | 0.1<br>(<0.1–2.0)   |
| Mali                       | 49.6<br>(35.5–63.4)     | 49.6<br>(35.5–63.4) | 21.9<br>(10.1–32.3) | 21.9<br>(10.1–32.3) | 7.4<br>(2.4–16.1)          | 7.4<br>(2.4–16.1)   | 3.9<br>(1.7–6.6)   | 3.9<br>(1.8–6.6)   | 7.3<br>(<0.1–26.7)  | 7.3<br>(<0.1–26.7)  | 1.3<br>(<0.1–13.3)  | 1.3<br>(<0.1–13.3)  |

|                       | Household air pollution |                     | Handwashing         |                     | Ambient particulate matter |                     | Secondhand smoke  |                   | High temperature   |                    | Low temperature    |                    |
|-----------------------|-------------------------|---------------------|---------------------|---------------------|----------------------------|---------------------|-------------------|-------------------|--------------------|--------------------|--------------------|--------------------|
|                       | M                       | F                   | M                   | F                   | M                          | F                   | M                 | F                 | M                  | F                  | M                  | F                  |
| Mauritania            | 18.3<br>(9.0–30.0)      | 18.3<br>(9.0–30.0)  | 19.6<br>(8.8–29.2)  | 19.6<br>(8.8–29.2)  | 21.2<br>(12.3–32.0)        | 21.2<br>(12.3–32.0) | 4.3<br>(1.8–7.6)  | 4.2<br>(1.8–7.3)  | 8.0<br>(1.7–19.5)  | 8.0<br>(1.7–19.5)  | 1.9<br>(<0.1–13.0) | 1.9<br>(<0.1–13.0) |
| Niger                 | 53.6<br>(38.2–73.9)     | 53.6<br>(38.2–73.9) | 21.4<br>(9.8–31.7)  | 21.4<br>(9.8–31.7)  | 6.1<br>(1.5–15.9)          | 6.1<br>(1.5–15.9)   | 3.6<br>(1.7–5.8)  | 3.6<br>(1.8–5.8)  | 8.4<br>(0.5–23.3)  | 8.4<br>(0.5–23.3)  | 1.6<br>(<0.1–11.5) | 1.6<br>(<0.1–11.5) |
| Nigeria               | 34.9<br>(23.3–47.5)     | 36.1<br>(23.7–49.5) | 22.1<br>(10.1–32.4) | 22.2<br>(10.2–32.6) | 15.2<br>(8.2–24.3)         | 14.9<br>(7.7–24.6)  | 2.7<br>(1.3–4.2)  | 2.7<br>(1.4–4.2)  | 10.3<br>(1.8–42.5) | 10.5<br>(2.0–43.2) | 1.3<br>(<0.1–3.7)  | 1.4<br>(<0.1–3.9)  |
| Sao Tome and Principe | 21.1<br>(10.6–33.9)     | 21.1<br>(10.6–33.9) | 17.4<br>(7.7–26.1)  | 17.4<br>(7.7–26.1)  | 11.6<br>(6.0–18.7)         | 11.6<br>(6.0–18.7)  | 1.4<br>(0.7–2.3)  | 1.5<br>(0.7–2.5)  | 0.9<br>(<0.1–3.7)  | 0.9<br>(<0.1–3.7)  | <0.1<br>(<0.1–1.9) | <0.1<br>(<0.1–1.9) |
| Senegal               | 36.2<br>(22.2–49.0)     | 36.2<br>(22.2–49.0) | 18.8<br>(8.4–28.1)  | 18.8<br>(8.4–28.1)  | 13.2<br>(6.3–22.1)         | 13.2<br>(6.3–22.1)  | 7.4<br>(4.2–11.0) | 7.5<br>(4.2–11.1) | 4.2<br>(<0.1–30.1) | 4.2<br>(<0.1–30.1) | 0.1<br>(<0.1–2.2)  | 0.1<br>(<0.1–2.2)  |
| Sierra Leone          | 45.4<br>(30.7–58.1)     | 45.4<br>(30.7–58.1) | 22.2<br>(10.2–32.6) | 22.2<br>(10.2–32.6) | 8.9<br>(3.7–16.9)          | 8.9<br>(3.7–16.9)   | 5.5<br>(2.1–9.8)  | 5.4<br>(2.1–9.7)  | 1.8<br>(<0.1–4.3)  | 1.8<br>(<0.1–4.3)  | 0.2<br>(<0.1–1.5)  | 0.2<br>(<0.1–1.5)  |
| Togo                  | 36.9<br>(22.8–50.9)     | 36.9<br>(22.8–50.9) | 22.0<br>(10.1–32.5) | 22.0<br>(10.1–32.5) | 11.5<br>(5.9–18.8)         | 11.5<br>(5.9–18.8)  | 5.2<br>(2.9–7.9)  | 5.2<br>(3.1–7.7)  | 2.7<br>(<0.1–13.0) | 2.7<br>(<0.1–13.0) | 0.1<br>(<0.1–0.9)  | 0.1<br>(<0.1–0.9)  |

Appendix Table 9. Population-attributable fractions of lower respiratory infections due to evaluated risk factors among people aged 15-49 years in 2019, males (M) and females (F) (95% UI)

|                                                         | Household air pollution    |                            | Smoking                    |                            | Ambient particulate matter |                           | Handwashing               |                           | Secondhand smoke        |                           | Alcohol use               |                         | High temperature         |                          | Low temperature           |                           |
|---------------------------------------------------------|----------------------------|----------------------------|----------------------------|----------------------------|----------------------------|---------------------------|---------------------------|---------------------------|-------------------------|---------------------------|---------------------------|-------------------------|--------------------------|--------------------------|---------------------------|---------------------------|
|                                                         | M                          | F                          | M                          | F                          | M                          | F                         | M                         | F                         | M                       | F                         | M                         | F                       | M                        | F                        | M                         | F                         |
| <b>Global</b>                                           | <b>15.6</b><br>(10.0–21.9) | <b>21.1</b><br>(14.5–27.9) | <b>20.4</b><br>(15.4–25.2) | <b>4.3</b><br>(2.8–5.9)    | <b>13.2</b><br>(9.4–17.6)  | <b>13.4</b><br>(9.5–17.8) | <b>11.8</b><br>(5.3–17.9) | <b>12.9</b><br>(5.7–19.5) | <b>5.8</b><br>(3.2–8.6) | <b>10.1</b><br>(5.8–14.4) | <b>9.1</b><br>(4.6–12.8)  | <b>2.0</b><br>(0.6–3.4) | <b>3.0</b><br>(1.3–6.9)  | <b>3.7</b><br>(1.6–8.1)  | <b>5.3</b><br>(2.7–7.9)   | <b>4.3</b><br>(1.9–6.7)   |
| <b>Central Europe, Eastern Europe, and Central Asia</b> | <b>0.7</b><br>(0.2–1.4)    | <b>1.4</b><br>(0.6–2.7)    | <b>39.9</b><br>(33.0–46.4) | <b>16.4</b><br>(11.3–21.6) | <b>7.6</b><br>(4.4–12.0)   | <b>8.7</b><br>(5.1–13.4)  | <b>2.6</b><br>(1.1–4.3)   | <b>2.9</b><br>(1.2–4.7)   | <b>6.9</b><br>(4.2–9.7) | <b>14.6</b><br>(9.3–20.1) | <b>16.8</b><br>(9.2–23.3) | <b>5.6</b><br>(1.8–9.4) | <b>0.1</b><br>(<0.1–0.5) | <b>0.2</b><br>(<0.1–0.7) | <b>17.8</b><br>(7.4–28.3) | <b>17.8</b><br>(8.3–28.0) |
| Central Asia                                            | 2.4<br>(1.0–4.7)           | 3.7<br>(1.7–6.8)           | 25.6<br>(20.1–31.1)        | 3.4<br>(2.0–5.0)           | 14.3<br>(7.9–22.5)         | 14.9<br>(8.1–23.7)        | 4.5<br>(1.8–7.2)          | 4.7<br>(1.9–7.7)          | 6.6<br>(4.0–9.5)        | 13.3<br>(8.3–18.4)        | 9.9<br>(4.5–14.8)         | 1.4<br>(0.0–3.2)        | 0.8<br>(<0.1–1.9)        | 0.8<br>(<0.1–2.0)        | 18.2<br>(13.1–24.4)       | 18.4<br>(13.3–24.2)       |
| Armenia                                                 | 0.4<br>(0.1–0.9)           | 0.5<br>(0.2–1.2)           | 39.9<br>(33.4–46.3)        | 3.1<br>(1.7–4.9)           | 16.8<br>(9.1–26.9)         | 16.8<br>(9.2–26.9)        | 3.8<br>(1.5–6.2)          | 3.8<br>(1.5–6.2)          | 7.9<br>(5.0–11.2)       | 21.5<br>(14.6–28.9)       | 6.6<br>(1.6–11.4)         | 4.9<br>(1.9–8.0)        | <0.1<br>(<0.1–0.2)       | <0.1<br>(<0.1–0.2)       | 18.4<br>(8.4–31.6)        | 18.4<br>(8.4–31.6)        |
| Azerbaijan                                              | 0.9<br>(0.3–2.2)           | 1.3<br>(0.4–2.9)           | 29.6<br>(23.4–35.6)        | 2.2<br>(1.1–3.6)           | 12.9<br>(6.1–22.6)         | 12.9<br>(6.2–22.5)        | 3.5<br>(1.4–5.7)          | 3.5<br>(1.4–5.7)          | 8.8<br>(5.7–12.3)       | 21.4<br>(14.6–28.5)       | 11.5<br>(5.0–17.3)        | 2.8<br>(0.3–5.8)        | 0.5<br>(<0.1–1.1)        | 0.5<br>(<0.1–1.1)        | 15.7<br>(12.6–19.1)       | 15.7<br>(12.6–19.1)       |
| Georgia                                                 | 4.0<br>(1.3–8.7)           | 5.7<br>(2.0–12.0)          | 38.7<br>(32.2–45.4)        | 6.5<br>(4.1–9.3)           | 9.1<br>(5.3–14.5)          | 9.0<br>(5.3–13.7)         | 3.3<br>(1.3–5.4)          | 3.3<br>(1.3–5.4)          | 8.5<br>(5.3–12.2)       | 20.8<br>(13.9–27.9)       | 14.6<br>(7.8–20.8)        | 0.8<br>(0.0–3.0)        | <0.1<br>(<0.1–0.2)       | <0.1<br>(<0.1–0.2)       | 18.9<br>(11.2–29.0)       | 18.9<br>(11.2–29.0)       |
| Kazakhstan                                              | 1.2<br>(0.3–2.8)           | 1.8<br>(0.6–4.1)           | 36.7<br>(28.0–44.7)        | 9.0<br>(5.3–13.0)          | 10.3<br>(5.4–16.8)         | 10.3<br>(5.4–16.7)        | 3.4<br>(1.4–5.7)          | 3.4<br>(1.4–5.7)          | 5.4<br>(3.2–8.1)        | 14.8<br>(9.1–20.8)        | 12.2<br>(5.7–18.5)        | 3.5<br>(<0.1–7.5)       | 0.5<br>(<0.1–2.0)        | 0.5<br>(<0.1–2.0)        | 18.4<br>(11.3–27.6)       | 18.4<br>(11.3–27.6)       |
| Kyrgyzstan                                              | 5.6<br>(2.3–10.7)          | 7.6<br>(3.5–14.0)          | 29.9<br>(23.7–35.8)        | 4.6<br>(2.9–6.7)           | 11.7<br>(6.3–19.4)         | 11.4<br>(6.2–18.5)        | 4.0<br>(1.6–6.5)          | 4.0<br>(1.6–6.5)          | 7.9<br>(5.0–11.0)       | 19.9<br>(13.2–26.8)       | 11.2<br>(5.6–16.1)        | 1.9<br>(0.1–3.7)        | <0.1<br>(<0.1–<0.1)      | <0.1<br>(<0.1–<0.1)      | 21.4<br>(8.4–37.4)        | 21.4<br>(8.4–37.4)        |
| Mongolia                                                | 6.7<br>(2.7–12.9)          | 9.3<br>(4.3–16.9)          | 29.7<br>(21.4–37.7)        | 4.1<br>(2.2–6.3)           | 17.2<br>(10.9–24.5)        | 16.6<br>(10.7–23.7)       | 8.5<br>(3.6–13.6)         | 8.5<br>(3.6–13.6)         | 4.9<br>(2.7–7.3)        | 15.4<br>(9.1–21.9)        | 14.3<br>(7.6–20.6)        | 2.1<br>(0.0–5.1)        | 0.2<br>(<0.1–0.9)        | 0.2<br>(<0.1–0.9)        | 18.3<br>(3.6–34.9)        | 18.3<br>(3.6–34.9)        |
| Tajikistan                                              | 8.0<br>(3.5–14.6)          | 10.4<br>(5.1–17.8)         | 17.8<br>(13.4–22.6)        | 1.9<br>(1.1–2.9)           | 16.7<br>(8.1–28.7)         | 16.0<br>(7.8–27.2)        | 7.1<br>(2.9–11.3)         | 7.1<br>(2.9–11.3)         | 8.4<br>(5.2–11.8)       | 13.2<br>(8.5–18.5)        | 6.1<br>(2.2–10.6)         | 0.6<br>(0.0–1.8)        | 0.3<br>(0.1–0.5)         | 0.3<br>(0.1–0.5)         | 21.4<br>(9.3–34.9)        | 21.4<br>(9.3–34.9)        |

|                        | Household air pollution |                        | Smoking                 |                         | Ambient particulate matter |                    | Handwashing      |                  | Secondhand smoke       |                     | Alcohol use             |                   | High temperature        |                         | Low temperature     |                         |
|------------------------|-------------------------|------------------------|-------------------------|-------------------------|----------------------------|--------------------|------------------|------------------|------------------------|---------------------|-------------------------|-------------------|-------------------------|-------------------------|---------------------|-------------------------|
|                        | M                       | F                      | M                       | F                       | M                          | F                  | M                | F                | M                      | F                   | M                       | F                 | M                       | F                       | M                   | F                       |
| Turkmenistan           | <0.1<br>(<0.1–<br><0.1) | <0.1<br>(<0.1–<br>0.1) | 24.5<br>(19.5–<br>30.1) | 3.0<br>(1.8–4.6)        | 13.3<br>(6.3–23.0)         | 13.3<br>(6.3–23.0) | 4.6<br>(1.9–7.4) | 4.6<br>(1.9–7.4) | 10.6<br>(7.0–<br>14.7) | 20.6<br>(14.1–27.4) | 10.9<br>(5.1–16.4)      | 1.1<br>(0.0–3.0)  | 2.6<br>(0.9–4.3)        | 2.6<br>(0.9–4.3)        | 12.7<br>(10.0–15.4) | 12.7<br>(10.0–<br>15.4) |
| Uzbekistan             | 1.7<br>(0.6–3.6)        | 2.3<br>(0.8–5.0)       | 18.0<br>(13.4–<br>23.1) | 1.8<br>(0.9–3.0)        | 16.9<br>(8.4–27.8)         | 16.7<br>(8.4–27.5) | 4.5<br>(1.8–7.3) | 4.5<br>(1.8–7.3) | 6.0<br>(3.4–8.8)       | 10.6<br>(6.1–15.3)  | 8.3<br>(3.0–13.2)       | 0.6<br>(0.0–2.1)  | 1.0<br>(<0.1–2.7)       | 1.0<br>(<0.1–2.7)       | 18.0<br>(13.9–22.0) | 18.0<br>(13.9–<br>22.0) |
| Central Europe         | 1.1<br>(0.3–2.5)        | 1.6<br>(0.5–3.6)       | 34.7<br>(27.9–<br>41.6) | 22.0<br>(16.2–<br>28.1) | 9.8<br>(6.0–14.7)          | 9.8<br>(6.0–14.4)  | 1.1<br>(0.4–1.7) | 1.1<br>(0.4–1.7) | 8.9<br>(5.4–<br>12.6)  | 12.1<br>(7.4–16.9)  | 18.7<br>(10.8–<br>25.1) | 4.3<br>(0.5–8.2)  | <0.1<br>(<0.1–0.1)      | <0.1<br>(<0.1–0.1)      | 21.0<br>(14.9–28.5) | 21.0<br>(14.8–<br>28.3) |
| Albania                | 4.1<br>(1.4–9.0)        | 5.4<br>(1.9–<br>11.6)  | 24.6<br>(18.9–<br>30.4) | 6.5<br>(3.9–9.2)        | 9.5<br>(5.8–14.1)          | 9.4<br>(5.8–14.0)  | 1.7<br>(0.7–2.9) | 1.7<br>(0.7–2.9) | 10.3<br>(6.6–<br>14.6) | 18.8<br>(12.5–25.2) | 8.9<br>(3.8–14.0)       | 3.0<br>(0.8–5.5)  | <0.1<br>(<0.1–0.1)      | <0.1<br>(<0.1–0.1)      | 19.2<br>(14.6–24.1) | 19.2<br>(14.6–<br>24.1) |
| Bosnia and Herzegovina | 4.0<br>(1.3–8.7)        | 5.5<br>(1.9–<br>11.4)  | 36.4<br>(29.8–<br>43.5) | 25.0<br>(18.8–<br>30.9) | 14.6<br>(9.3–20.5)         | 14.3<br>(9.3–20.0) | 1.3<br>(0.5–2.1) | 1.3<br>(0.5–2.1) | 12.0<br>(7.7–<br>17.0) | 16.0<br>(10.3–21.6) | 13.9<br>(7.2–19.8)      | 1.6<br>(0.0–3.8)  | <0.1<br>(<0.1–<br><0.1) | <0.1<br>(<0.1–<br><0.1) | 22.3<br>(15.8–29.9) | 22.3<br>(15.8–<br>29.9) |
| Bulgaria               | 1.7<br>(0.4–4.2)        | 2.4<br>(0.7–5.6)       | 41.9<br>(34.9–<br>49.1) | 29.5<br>(22.7–<br>36.6) | 10.0<br>(6.2–14.9)         | 9.9<br>(6.2–14.7)  | 1.1<br>(0.4–1.8) | 1.1<br>(0.4–1.8) | 9.6<br>(5.8–<br>13.7)  | 13.4<br>(8.3–18.6)  | 18.9<br>(10.7–<br>25.8) | 6.3<br>(1.4–10.8) | <0.1<br>(<0.1–<br><0.1) | <0.1<br>(<0.1–<br><0.1) | 21.3<br>(14.8–27.9) | 21.3<br>(14.8–<br>27.9) |
| Croatia                | 0.4<br>(0.1–1.2)        | 0.6<br>(0.2–1.7)       | 37.5<br>(29.9–<br>44.5) | 26.6<br>(19.5–<br>33.7) | 9.4<br>(5.7–14.3)          | 9.4<br>(5.7–14.2)  | 1.0<br>(0.4–1.6) | 1.0<br>(0.4–1.6) | 13.3<br>(8.4–<br>18.4) | 14.9<br>(9.5–20.6)  | 15.2<br>(7.0–22.5)      | 2.6<br>(0.0–6.8)  | <0.1<br>(<0.1–0.1)      | <0.1<br>(<0.1–0.1)      | 20.6<br>(13.3–27.4) | 20.6<br>(13.3–<br>27.4) |
| Czechia                | 0.1<br>(<0.1–<br>0.2)   | 0.1<br>(<0.1–<br>0.4)  | 33.7<br>(26.5–<br>40.7) | 22.2<br>(16.0–<br>28.8) | 8.4<br>(5.0–13.0)          | 8.4<br>(5.0–13.0)  | 0.9<br>(0.3–1.4) | 0.9<br>(0.3–1.4) | 10.2<br>(6.2–<br>14.5) | 13.3<br>(8.5–18.6)  | 20.1<br>(11.6–<br>27.0) | 7.8<br>(2.2–13.1) | <0.1<br>(<0.1–0.2)      | <0.1<br>(<0.1–0.2)      | 21.1<br>(13.6–30.0) | 21.1<br>(13.6–<br>30.0) |
| Hungary                | 1.3<br>(0.3–3.6)        | 2.0<br>(0.5–5.4)       | 38.3<br>(30.8–<br>45.7) | 26.2<br>(19.5–<br>32.9) | 8.4<br>(5.0–12.9)          | 8.4<br>(5.1–12.8)  | 0.9<br>(0.4–1.4) | 0.9<br>(0.4–1.4) | 10.3<br>(6.2–<br>14.8) | 13.7<br>(8.7–18.9)  | 17.5<br>(9.1–24.7)      | 2.2<br>(0.0–5.9)  | <0.1<br>(<0.1–0.2)      | <0.1<br>(<0.1–0.2)      | 21.4<br>(11.9–30.6) | 21.4<br>(11.9–<br>30.6) |
| Montenegro             | 2.8<br>(0.7–6.7)        | 3.9<br>(1.1–9.0)       | 35.5<br>(28.3–<br>42.4) | 26.2<br>(20.0–<br>33.0) | 10.9<br>(6.8–16.0)         | 10.8<br>(6.8–15.8) | 1.2<br>(0.5–2.0) | 1.2<br>(0.5–2.0) | 13.9<br>(9.1–<br>19.2) | 14.8<br>(9.8–20.4)  | 14.4<br>(7.0–20.6)      | 3.1<br>(0.0–7.7)  | <0.1<br>(<0.1–0.1)      | <0.1<br>(<0.1–0.1)      | 20.4<br>(14.1–28.1) | 20.4<br>(14.1–<br>28.1) |
| North Macedonia        | 2.5<br>(0.8–5.7)        | 3.5<br>(1.2–7.6)       | 34.6<br>(27.9–<br>41.2) | 20.6<br>(15.0–<br>26.3) | 15.2<br>(9.7–21.6)         | 15.0<br>(9.7–21.3) | 1.0<br>(0.4–1.7) | 1.0<br>(0.4–1.7) | 12.8<br>(8.2–<br>17.7) | 15.3<br>(9.7–21.0)  | 13.4<br>(6.2–19.8)      | 0.6<br>(0.0–2.6)  | <0.1<br>(<0.1–0.1)      | <0.1<br>(<0.1–0.1)      | 21.8<br>(15.6–28.1) | 21.8<br>(15.6–<br>28.1) |
| Poland                 | 0.9<br>(0.2–2.4)        | 1.4<br>(0.4–3.5)       | 32.2<br>(25.4–<br>39.0) | 22.9<br>(16.8–<br>29.1) | 11.7<br>(7.3–17.2)         | 11.7<br>(7.3–17.2) | 1.0<br>(0.4–1.6) | 1.0<br>(0.4–1.6) | 8.6<br>(5.0–<br>12.4)  | 10.9<br>(6.5–15.3)  | 18.7<br>(10.5–<br>25.2) | 4.7<br>(0.4–9.0)  | <0.1<br>(<0.1–0.2)      | <0.1<br>(<0.1–0.2)      | 21.1<br>(13.2–30.1) | 21.1<br>(13.3–<br>30.0) |
| Romania                | 1.1<br>(0.3–2.8)        | 1.6<br>(0.4–4.0)       | 35.5<br>(28.2–<br>43.0) | 18.6<br>(12.8–<br>24.8) | 7.9<br>(4.7–12.1)          | 7.9<br>(4.8–12.1)  | 1.2<br>(0.5–2.0) | 1.2<br>(0.5–2.0) | 8.2<br>(4.7–<br>11.9)  | 12.1<br>(7.1–17.1)  | 19.4<br>(11.3–<br>26.2) | 3.4<br>(0.0–7.5)  | <0.1<br>(<0.1–0.1)      | <0.1<br>(<0.1–0.1)      | 20.7<br>(14.2–28.2) | 20.7<br>(14.2–<br>28.2) |
| Serbia                 | 2.0<br>(0.6–4.9)        | 2.9<br>(0.9–6.7)       | 37.1<br>(30.2–<br>43.9) | 27.5<br>(20.4–<br>34.7) | 13.0<br>(8.2–19.2)         | 12.9<br>(8.2–18.9) | 1.0<br>(0.4–1.6) | 1.0<br>(0.4–1.6) | 10.2<br>(6.2–<br>14.5) | 12.4<br>(7.6–17.4)  | 16.9<br>(8.9–23.7)      | 3.8<br>(0.8–7.0)  | <0.1<br>(<0.1–0.1)      | <0.1<br>(<0.1–0.1)      | 21.9<br>(14.8–28.9) | 21.9<br>(14.8–<br>28.9) |
| Slovakia               | 0.1<br>(<0.1–<br>0.2)   | 0.1<br>(<0.1–<br>0.3)  | 32.0<br>(24.5–<br>39.4) | 18.9<br>(13.4–<br>25.0) | 9.4<br>(5.5–14.5)          | 9.4<br>(5.5–14.4)  | 0.9<br>(0.3–1.4) | 0.9<br>(0.3–1.4) | 9.0<br>(5.3–<br>13.1)  | 11.2<br>(6.9–16.1)  | 19.0<br>(10.8–<br>25.8) | 3.8<br>(0.0–8.5)  | <0.1<br>(<0.1–0.1)      | <0.1<br>(<0.1–0.1)      | 20.2<br>(13.2–29.4) | 20.2<br>(13.2–<br>29.4) |
| Slovenia               | 0.5<br>(0.1–1.5)        | 0.8<br>(0.2–2.2)       | 37.3<br>(30.2–<br>44.0) | 25.3<br>(19.3–<br>31.6) | 8.6<br>(5.3–13.3)          | 8.6<br>(5.3–13.2)  | 0.8<br>(0.3–1.4) | 0.8<br>(0.3–1.4) | 12.3<br>(7.8–<br>16.9) | 13.3<br>(8.6–18.6)  | 7.5<br>(0.0–16.9)       | 1.5<br>(0.0–5.8)  | <0.1<br>(<0.1–0.1)      | <0.1<br>(<0.1–0.1)      | 22.1<br>(15.2–30.1) | 22.1<br>(15.2–<br>30.1) |
| Eastern Europe         | 0.2<br>(0.1–0.5)        | 0.3<br>(0.1–0.8)       | 43.8<br>(36.5–<br>50.5) | 21.2<br>(14.7–<br>27.8) | 5.8<br>(3.1–9.9)           | 5.7<br>(3.0–9.8)   | 2.4<br>(1.0–4.0) | 2.4<br>(1.0–4.0) | 6.6<br>(4.0–9.4)       | 15.7<br>(10.1–21.3) | 18.1<br>(9.8–24.9)      | 7.8<br>(2.8–12.5) | <0.1<br>(<0.1–0.3)      | <0.1<br>(<0.1–0.3)      | 17.2<br>(3.1–29.6)  | 17.0<br>(1.6–30.1)      |
| Belarus                | 0.1<br>(<0.1–<br>0.2)   | 0.1<br>(<0.1–<br>0.3)  | 40.1<br>(31.8–<br>47.6) | 22.6<br>(15.4–<br>29.8) | 8.2<br>(4.7–13.0)          | 8.2<br>(4.7–13.0)  | 1.9<br>(0.8–3.1) | 1.9<br>(0.8–3.1) | 6.5<br>(3.9–9.5)       | 14.6<br>(9.2–20.1)  | 19.4<br>(10.8–<br>26.2) | 6.2<br>(1.0–11.9) | <0.1<br>(<0.1–0.2)      | <0.1<br>(<0.1–0.2)      | 18.3<br>(9.6–30.8)  | 18.3<br>(9.6–30.8)      |

|                           | Household air pollution      |                              | Smoking                     |                             | Ambient particulate matter |                          | Handwashing              |                          | Secondhand smoke          |                           | Alcohol use                |                           | High temperature         |                          | Low temperature             |                             |
|---------------------------|------------------------------|------------------------------|-----------------------------|-----------------------------|----------------------------|--------------------------|--------------------------|--------------------------|---------------------------|---------------------------|----------------------------|---------------------------|--------------------------|--------------------------|-----------------------------|-----------------------------|
|                           | M                            | F                            | M                           | F                           | M                          | F                        | M                        | F                        | M                         | F                         | M                          | F                         | M                        | F                        | M                           | F                           |
| Estonia                   | 0.4<br>(<0.1–1.2)            | 0.6<br>(0.1–1.9)             | 40.5<br>(32.9–48.1)         | 23.2<br>(16.2–30.3)         | 1.7<br>(0.5–3.5)           | 1.9<br>(0.7–3.7)         | 1.8<br>(0.7–3.0)         | 1.8<br>(0.7–3.0)         | 7.7<br>(4.5–11.4)         | 11.8<br>(7.3–16.4)        | 22.2<br>(13.3–29.5)        | 8.4<br>(2.4–14.2)         | 0.1<br>(<0.1–0.5)        | 0.1<br>(<0.1–0.5)        | 15.8<br>(3.4–32.6)          | 15.8<br>(3.4–32.6)          |
| Latvia                    | 0.4<br>(0.1–1.1)             | 0.6<br>(0.1–1.7)             | 40.4<br>(32.2–48.3)         | 21.2<br>(13.8–28.7)         | 5.6<br>(3.1–9.1)           | 5.6<br>(3.1–9.1)         | 1.9<br>(0.8–3.1)         | 1.9<br>(0.8–3.1)         | 5.2<br>(2.8–7.9)          | 12.3<br>(7.3–17.8)        | 21.6<br>(12.5–28.5)        | 6.6<br>(0.9–11.8)         | <0.1<br>(<0.1–0.3)       | <0.1<br>(<0.1–0.3)       | 17.2<br>(7.2–31.3)          | 17.2<br>(7.2–31.3)          |
| Lithuania                 | 0.2<br>(<0.1–0.5)            | 0.3<br>(<0.1–0.7)            | 35.4<br>(27.2–43.0)         | 19.9<br>(14.0–26.1)         | 4.5<br>(2.3–7.6)           | 4.5<br>(2.3–7.6)         | 1.9<br>(0.8–3.2)         | 1.9<br>(0.8–3.2)         | 6.0<br>(3.4–9.2)          | 12.0<br>(7.2–17.1)        | 20.9<br>(12.3–27.9)        | 9.2<br>(3.2–15.3)         | <0.1<br>(<0.1–0.2)       | <0.1<br>(<0.1–0.2)       | 19.1<br>(9.2–31.0)          | 19.1<br>(9.2–31.0)          |
| Republic of Moldova       | 0.7<br>(0.2–1.7)             | 1.1<br>(0.4–2.4)             | 46.8<br>(39.4–53.9)         | 8.9<br>(5.7–12.7)           | 6.7<br>(3.3–11.9)          | 6.7<br>(3.4–11.9)        | 4.6<br>(1.9–7.4)         | 4.6<br>(1.9–7.4)         | 6.9<br>(4.5–9.7)          | 17.9<br>(12.2–24.0)       | 18.7<br>(10.5–25.4)        | 8.1<br>(2.8–13.3)         | <0.1<br>(<0.1–0.1)       | <0.1<br>(<0.1–0.1)       | 22.1<br>(13.3–30.8)         | 22.1<br>(13.3–30.8)         |
| Russian Federation        | 0.1<br>(<0.1–0.4)            | 0.2<br>(0.1–0.6)             | 44.7<br>(37.6–51.6)         | 22.2<br>(15.6–28.7)         | 5.2<br>(2.6–9.0)           | 5.2<br>(2.6–9.1)         | 2.1<br>(0.9–3.5)         | 2.2<br>(0.9–3.6)         | 6.6<br>(4.1–9.5)          | 15.8<br>(10.2–21.7)       | 18.5<br>(10.4–25.4)        | 6.9<br>(2.0–11.9)         | <0.1<br>(<0.1–0.4)       | <0.1<br>(<0.1–0.4)       | 16.0<br>(<0.1–32.1)         | 16.1<br>(<0.1–32.3)         |
| Ukraine                   | 0.4<br>(0.1–0.9)             | 0.6<br>(0.2–1.3)             | 41.9<br>(33.6–49.2)         | 18.7<br>(11.8–26.0)         | 7.1<br>(3.7–12.4)          | 7.1<br>(3.8–12.4)        | 3.1<br>(1.2–5.1)         | 3.1<br>(1.2–5.1)         | 6.7<br>(3.8–9.9)          | 15.4<br>(9.7–21.0)        | 16.8<br>(8.8–24.1)         | 10.6<br>(4.6–16.3)        | <0.1<br>(<0.1–0.2)       | <0.1<br>(<0.1–0.2)       | 19.7<br>(13.3–26.3)         | 19.7<br>(13.3–26.3)         |
| <b>High-income</b>        | <b>0.1<br/>(&lt;0.1–0.2)</b> | <b>0.1<br/>(&lt;0.1–0.3)</b> | <b>28.9<br/>(22.8–34.8)</b> | <b>20.8<br/>(15.8–26.0)</b> | <b>5.1<br/>(2.8–8.4)</b>   | <b>4.6<br/>(2.5–7.7)</b> | <b>1.5<br/>(0.6–2.4)</b> | <b>1.4<br/>(0.6–2.3)</b> | <b>8.6<br/>(5.3–12.1)</b> | <b>9.7<br/>(6.0–13.5)</b> | <b>14.0<br/>(6.9–19.8)</b> | <b>7.9<br/>(2.9–12.4)</b> | <b>0.6<br/>(0.3–0.9)</b> | <b>0.6<br/>(0.3–1.0)</b> | <b>17.0<br/>(12.5–22.0)</b> | <b>16.7<br/>(12.4–21.7)</b> |
| Australasia               | <0.1<br>(<0.1–<0.1)          | <0.1<br>(<0.1–0.1)           | 27.0<br>(20.8–33.6)         | 21.2<br>(15.4–27.3)         | 1.9<br>(0.5–4.2)           | 1.9<br>(0.5–4.2)         | 1.9<br>(0.8–3.2)         | 1.9<br>(0.8–3.2)         | 8.2<br>(4.6–12.1)         | 8.8<br>(5.1–13.0)         | 17.5<br>(9.5–24.0)         | 7.3<br>(1.6–12.7)         | 6.6<br>(4.4–8.8)         | 6.6<br>(4.4–8.9)         | 7.1<br>(4.1–10.1)           | 7.1<br>(4.1–10.0)           |
| Australia                 | <0.1<br>(<0.1–<0.1)          | <0.1<br>(<0.1–0.1)           | 27.3<br>(21.0–34.0)         | 21.4<br>(15.5–27.4)         | 1.9<br>(0.5–4.3)           | 1.9<br>(0.5–4.3)         | 1.9<br>(0.8–3.2)         | 1.9<br>(0.8–3.2)         | 8.2<br>(4.6–12.1)         | 8.8<br>(5.2–13.0)         | 17.8<br>(9.8–24.5)         | 7.2<br>(1.5–12.7)         | 7.3<br>(4.8–9.7)         | 7.3<br>(4.8–9.7)         | 5.9<br>(2.7–8.9)            | 5.9<br>(2.7–8.9)            |
| New Zealand               | <0.1<br>(<0.1–<0.1)          | <0.1<br>(<0.1–0.1)           | 22.8<br>(16.3–29.4)         | 19.2<br>(13.1–25.5)         | 1.5<br>(0.2–3.5)           | 1.5<br>(0.3–3.5)         | 2.0<br>(0.8–3.2)         | 2.0<br>(0.8–3.2)         | 8.6<br>(4.9–12.7)         | 8.4<br>(4.7–12.2)         | 14.8<br>(6.8–20.8)         | 8.6<br>(2.8–13.9)         | <0.1<br>(<0.1–<0.1)      | <0.1<br>(<0.1–<0.1)      | 20.5<br>(13.3–27.8)         | 20.5<br>(13.3–27.8)         |
| High-income Asia Pacific  | <0.1<br>(<0.1–<0.1)          | <0.1<br>(<0.1–<0.1)          | 33.8<br>(27.0–40.5)         | 12.2<br>(8.6–16.2)          | 8.5<br>(4.9–13.5)          | 8.2<br>(4.7–13.1)        | 1.9<br>(0.7–3.1)         | 1.9<br>(0.7–3.1)         | 7.6<br>(4.6–11.0)         | 12.9<br>(8.1–17.9)        | 12.8<br>(6.2–19.0)         | 8.0<br>(3.1–12.8)         | 0.5<br>(<0.1–1.3)        | 0.5<br>(<0.1–1.4)        | 15.7<br>(12.4–19.0)         | 15.4<br>(12.2–18.6)         |
| Brunei Darussalam         | <0.1<br>(<0.1–0.1)           | 0.1<br>(<0.1–0.2)            | 26.5<br>(20.6–33.1)         | 4.2<br>(2.5–6.4)            | 2.6<br>(0.8–5.4)           | 2.6<br>(0.8–5.4)         | 2.0<br>(0.8–3.2)         | 2.0<br>(0.8–3.2)         | 7.0<br>(4.2–10.1)         | 11.1<br>(6.9–15.8)        | 0.2<br>(0.0–1.5)           | 0.1<br>(0.0–0.7)          | 0.9<br>(<0.1–5.8)        | 0.9<br>(<0.1–5.8)        | <0.1<br>(<0.1–0.5)          | <0.1<br>(<0.1–0.5)          |
| Japan                     | <0.1<br>(<0.1–<0.1)          | <0.1<br>(<0.1–0.1)           | 33.8<br>(26.8–40.7)         | 14.5<br>(10.3–19.2)         | 6.4<br>(3.5–10.5)          | 6.4<br>(3.5–10.5)        | 1.9<br>(0.7–3.1)         | 1.9<br>(0.7–3.1)         | 8.2<br>(5.0–11.9)         | 13.6<br>(8.5–18.7)        | 12.0<br>(5.4–18.7)         | 7.9<br>(2.6–13.5)         | 0.5<br>(<0.1–1.0)        | 0.5<br>(<0.1–1.0)        | 16.0<br>(12.9–19.4)         | 16.0<br>(12.9–19.3)         |
| Republic of Korea         | <0.1<br>(<0.1–<0.1)          | <0.1<br>(<0.1–<0.1)          | 38.3<br>(30.8–45.5)         | 6.9<br>(4.5–10.0)           | 14.2<br>(8.6–21.1)         | 14.2<br>(8.6–21.1)       | 1.9<br>(0.7–3.1)         | 1.9<br>(0.7–3.1)         | 6.8<br>(3.9–10.0)         | 13.0<br>(8.0–18.1)        | 18.5<br>(10.5–25.3)        | 11.4<br>(5.6–17.1)        | 0.2<br>(<0.1–0.9)        | 0.2<br>(<0.1–0.9)        | 20.4<br>(14.7–25.9)         | 20.4<br>(14.7–25.9)         |
| Singapore                 | <0.1<br>(<0.1–<0.1)          | <0.1<br>(<0.1–0.1)           | 20.2<br>(14.4–26.4)         | 7.2<br>(4.3–10.5)           | 9.5<br>(5.0–16.2)          | 9.5<br>(5.0–16.2)        | 1.9<br>(0.8–3.1)         | 1.9<br>(0.8–3.1)         | 5.7<br>(3.1–8.4)          | 8.0<br>(4.6–11.6)         | 3.3<br>(0.0–7.1)           | 1.4<br>(0.0–3.3)          | 1.3<br>(<0.1–11.7)       | 1.3<br>(<0.1–11.7)       | 0.1<br>(<0.1–1.2)           | 0.1<br>(<0.1–1.2)           |
| High-income North America | <0.1<br>(<0.1–<0.1)          | <0.1<br>(<0.1–<0.1)          | 27.2<br>(21.6–32.8)         | 21.5<br>(16.4–26.4)         | 2.6<br>(1.2–4.9)           | 2.6<br>(1.2–5.0)         | 1.0<br>(0.4–1.6)         | 1.0<br>(0.4–1.6)         | 9.2<br>(5.8–13.1)         | 8.9<br>(5.7–12.7)         | 13.4<br>(6.8–18.8)         | 9.0<br>(3.8–13.6)         | 0.7<br>(0.3–1.1)         | 0.7<br>(0.3–1.0)         | 15.3<br>(11.5–19.2)         | 15.1<br>(11.4–19.0)         |
| Canada                    | <0.1<br>(<0.1–<0.1)          | <0.1<br>(<0.1–<0.1)          | 26.5<br>(20.6–32.5)         | 20.9<br>(15.5–26.9)         | 2.2<br>(0.9–4.4)           | 2.2<br>(0.9–4.4)         | 1.0<br>(0.4–1.7)         | 1.0<br>(0.4–1.7)         | 9.2<br>(5.8–13.0)         | 9.2<br>(5.7–12.9)         | 14.4<br>(7.0–20.5)         | 8.4<br>(2.8–13.5)         | <0.1<br>(<0.1–0.3)       | <0.1<br>(<0.1–0.3)       | 20.8<br>(0.8–39.3)          | 20.8<br>(0.8–39.3)          |
| United States of America  | <0.1<br>(<0.1–<0.1)          | <0.1<br>(<0.1–<0.1)          | 27.2<br>(21.6–32.8)         | 21.5<br>(16.5–26.5)         | 2.6<br>(1.2–5.0)           | 2.6<br>(1.2–5.0)         | 1.0<br>(0.4–1.6)         | 1.0<br>(0.4–1.6)         | 9.2<br>(5.8–13.0)         | 8.9<br>(5.7–12.7)         | 13.3<br>(6.8–18.8)         | 9.0<br>(3.9–13.5)         | 0.7<br>(0.3–1.1)         | 0.7<br>(0.3–1.1)         | 14.9<br>(11.5–18.6)         | 14.8<br>(11.4–18.3)         |

|                        | Household air pollution |                     | Smoking             |                     | Ambient particulate matter |                    | Handwashing      |                  | Secondhand smoke   |                    | Alcohol use         |                   | High temperature    |                     | Low temperature     |                     |
|------------------------|-------------------------|---------------------|---------------------|---------------------|----------------------------|--------------------|------------------|------------------|--------------------|--------------------|---------------------|-------------------|---------------------|---------------------|---------------------|---------------------|
|                        | M                       | F                   | M                   | F                   | M                          | F                  | M                | F                | M                  | F                  | M                   | F                 | M                   | F                   | M                   | F                   |
| Southern Latin America | 0.3<br>(0.1–0.8)        | 0.5<br>(0.1–1.1)    | 26.3<br>(20.2–32.4) | 19.2<br>(13.4–24.7) | 6.9<br>(3.7–11.6)          | 6.7<br>(3.6–11.3)  | 2.4<br>(1.0–4.0) | 2.5<br>(1.0–4.1) | 7.5<br>(4.1–11.1)  | 9.2<br>(5.2–13.5)  | 13.5<br>(6.0–20.0)  | 6.2<br>(1.0–11.2) | 0.8<br>(0.5–1.2)    | 0.9<br>(0.5–1.3)    | 16.2<br>(10.3–22.8) | 16.0<br>(10.3–22.4) |
| Argentina              | 0.3<br>(0.1–0.8)        | 0.4<br>(0.1–1.0)    | 25.8<br>(19.7–31.7) | 18.8<br>(13.0–24.2) | 6.5<br>(3.4–11.1)          | 6.5<br>(3.4–11.1)  | 2.5<br>(1.0–4.1) | 2.5<br>(1.0–4.1) | 7.5<br>(4.2–11.1)  | 9.2<br>(5.2–13.5)  | 13.5<br>(6.0–20.1)  | 6.2<br>(1.0–11.3) | 0.9<br>(0.5–1.4)    | 0.9<br>(0.5–1.4)    | 16.1<br>(10.5–22.4) | 16.1<br>(10.5–22.4) |
| Chile                  | 0.6<br>(0.1–1.4)        | 0.8<br>(0.2–2.1)    | 30.8<br>(22.0–38.8) | 24.5<br>(16.1–32.3) | 11.7<br>(7.1–18.0)         | 11.7<br>(7.1–17.9) | 2.0<br>(0.8–3.4) | 2.0<br>(0.8–3.4) | 7.3<br>(3.7–11.3)  | 8.1<br>(4.1–12.5)  | 14.0<br>(6.5–20.9)  | 6.5<br>(1.5–11.9) | <0.1<br>(<0.1–<0.1) | <0.1<br>(<0.1–<0.1) | 19.3<br>(10.4–29.4) | 19.3<br>(10.4–29.4) |
| Uruguay                | 0.2<br>(0.1–0.6)        | 0.3<br>(0.1–0.9)    | 29.7<br>(23.9–35.9) | 22.7<br>(16.7–28.9) | 4.0<br>(1.7–7.6)           | 4.0<br>(1.8–7.6)   | 2.3<br>(0.9–3.7) | 2.3<br>(0.9–3.7) | 8.7<br>(5.2–12.6)  | 10.7<br>(6.4–15.3) | 12.6<br>(5.7–18.8)  | 5.5<br>(1.1–10.1) | 0.1<br>(<0.1–0.3)   | 0.1<br>(<0.1–0.3)   | 8.0<br>(4.5–11.6)   | 8.0<br>(4.5–11.6)   |
| Western Europe         | <0.1<br>(<0.1–<0.1)     | <0.1<br>(<0.1–0.1)  | 31.0<br>(24.2–37.9) | 24.6<br>(18.0–31.1) | 4.9<br>(2.7–8.2)           | 4.9<br>(2.7–8.1)   | 1.0<br>(0.4–1.7) | 1.0<br>(0.4–1.7) | 9.2<br>(5.6–13.1)  | 10.2<br>(6.2–14.4) | 15.8<br>(8.3–21.9)  | 7.4<br>(2.5–12.1) | 0.1<br>(<0.1–0.2)   | 0.1<br>(<0.1–0.2)   | 20.9<br>(14.9–27.3) | 21.3<br>(15.0–28.1) |
| Andorra                | <0.1<br>(<0.1–<0.1)     | <0.1<br>(<0.1–<0.1) | 32.7<br>(24.2–40.4) | 25.6<br>(17.6–33.9) | 3.5<br>(1.7–6.3)           | 3.5<br>(1.7–6.3)   | 1.0<br>(0.4–1.6) | 1.0<br>(0.4–1.6) | 9.6<br>(5.8–13.8)  | 11.2<br>(6.8–15.9) | 16.2<br>(8.1–23.1)  | 7.0<br>(1.4–12.0) | <0.1<br>(<0.1–<0.1) | <0.1<br>(<0.1–<0.1) | 17.0<br>(1.9–35.8)  | 17.0<br>(1.9–35.8)  |
| Austria                | <0.1<br>(<0.1–0.1)      | <0.1<br>(<0.1–0.1)  | 35.9<br>(29.3–42.4) | 27.1<br>(20.9–33.6) | 5.6<br>(3.1–9.1)           | 5.6<br>(3.1–9.1)   | 1.0<br>(0.4–1.6) | 1.0<br>(0.4–1.6) | 12.3<br>(7.9–17.0) | 13.5<br>(8.9–18.5) | 18.1<br>(9.8–24.5)  | 7.6<br>(2.3–12.7) | <0.1<br>(<0.1–0.1)  | <0.1<br>(<0.1–0.1)  | 19.7<br>(10.6–31.5) | 19.7<br>(10.6–31.5) |
| Belgium                | <0.1<br>(<0.1–<0.1)     | <0.1<br>(<0.1–<0.1) | 32.0<br>(25.7–38.5) | 25.0<br>(19.0–31.2) | 5.9<br>(3.4–9.7)           | 5.9<br>(3.4–9.7)   | 1.0<br>(0.4–1.6) | 1.0<br>(0.4–1.6) | 11.0<br>(6.8–15.6) | 10.9<br>(6.8–15.3) | 16.9<br>(9.2–23.7)  | 8.9<br>(3.2–14.3) | <0.1<br>(<0.1–0.1)  | <0.1<br>(<0.1–0.1)  | 23.4<br>(14.7–32.7) | 23.4<br>(14.7–32.7) |
| Cyprus                 | <0.1<br>(<0.1–<0.1)     | <0.1<br>(<0.1–0.1)  | 38.8<br>(31.0–46.6) | 24.1<br>(17.7–31.2) | 7.7<br>(4.5–12.5)          | 7.7<br>(4.5–12.5)  | 1.0<br>(0.4–1.6) | 1.0<br>(0.4–1.6) | 10.2<br>(6.3–14.5) | 15.2<br>(9.5–20.9) | 17.3<br>(8.8–24.1)  | 4.2<br>(0.1–8.2)  | 2.1<br>(0.9–3.6)    | 2.1<br>(0.9–3.6)    | 4.5<br>(<0.1–10.9)  | 4.5<br>(<0.1–10.9)  |
| Denmark                | <0.1<br>(<0.1–<0.1)     | <0.1<br>(<0.1–<0.1) | 28.9<br>(22.4–35.0) | 24.3<br>(18.3–30.0) | 4.0<br>(2.1–7.2)           | 4.0<br>(2.1–7.2)   | 1.0<br>(0.4–1.6) | 1.0<br>(0.4–1.6) | 9.9<br>(6.0–14.4)  | 9.9<br>(6.2–14.3)  | 12.3<br>(5.1–18.9)  | 6.6<br>(0.9–12.1) | <0.1<br>(<0.1–<0.1) | <0.1<br>(<0.1–<0.1) | 23.2<br>(13.0–34.4) | 23.2<br>(13.0–34.4) |
| Finland                | <0.1<br>(<0.1–<0.1)     | <0.1<br>(<0.1–<0.1) | 27.2<br>(20.9–33.7) | 18.8<br>(13.4–24.5) | 1.2<br>(0.2–2.9)           | 1.2<br>(0.2–2.9)   | 1.0<br>(0.4–1.7) | 1.0<br>(0.4–1.7) | 7.7<br>(4.4–11.4)  | 8.5<br>(5.0–12.0)  | 16.6<br>(8.6–23.1)  | 6.2<br>(0.8–11.9) | <0.1<br>(<0.1–0.3)  | <0.1<br>(<0.1–0.3)  | 17.9<br>(3.8–36.4)  | 17.9<br>(3.8–36.4)  |
| France                 | <0.1<br>(<0.1–<0.1)     | <0.1<br>(<0.1–<0.1) | 30.5<br>(22.4–38.3) | 25.7<br>(18.6–32.9) | 5.1<br>(2.8–8.5)           | 5.1<br>(2.8–8.5)   | 1.0<br>(0.4–1.7) | 1.0<br>(0.4–1.7) | 7.9<br>(4.3–12.0)  | 8.1<br>(4.5–11.9)  | 17.4<br>(9.1–24.4)  | 8.4<br>(2.5–13.9) | <0.1<br>(<0.1–0.1)  | <0.1<br>(<0.1–0.1)  | 21.7<br>(14.9–28.4) | 21.7<br>(14.9–28.4) |
| Germany                | <0.1<br>(<0.1–<0.1)     | <0.1<br>(<0.1–<0.1) | 31.8<br>(25.0–38.7) | 22.8<br>(16.5–29.3) | 5.3<br>(3.0–8.8)           | 5.3<br>(3.0–8.8)   | 1.0<br>(0.4–1.6) | 1.0<br>(0.4–1.6) | 9.7<br>(5.8–13.9)  | 10.1<br>(6.0–14.3) | 18.3<br>(10.3–25.4) | 9.7<br>(3.1–15.5) | <0.1<br>(<0.1–0.2)  | <0.1<br>(<0.1–0.2)  | 22.5<br>(14.3–31.1) | 22.5<br>(14.3–31.1) |
| Greece                 | <0.1<br>(<0.1–0.1)      | 0.1<br>(<0.1–0.2)   | 39.7<br>(31.9–46.7) | 31.5<br>(23.7–39.0) | 6.9<br>(4.0–10.9)          | 6.9<br>(4.0–10.9)  | 1.0<br>(0.4–1.7) | 1.0<br>(0.4–1.7) | 10.3<br>(6.3–14.9) | 13.1<br>(8.2–18.4) | 14.7<br>(7.0–21.3)  | 3.1<br>(0.0–7.6)  | 0.1<br>(<0.1–0.3)   | 0.1<br>(<0.1–0.3)   | 15.7<br>(12.3–19.4) | 15.7<br>(12.3–19.4) |
| Iceland                | <0.1<br>(<0.1–<0.1)     | <0.1<br>(<0.1–<0.1) | 24.5<br>(19.3–30.2) | 18.0<br>(13.4–22.8) | 1.2<br>(0.2–3.0)           | 1.2<br>(0.2–3.0)   | 1.0<br>(0.4–1.7) | 1.0<br>(0.4–1.7) | 12.0<br>(7.8–16.9) | 12.4<br>(8.1–16.9) | 12.4<br>(5.5–18.9)  | 4.7<br>(0.0–9.8)  | <0.1<br>(0.0–0.0)   | <0.1<br>(0.0–0.0)   | 21.5<br>(5.1–38.7)  | 21.5<br>(5.1–38.7)  |
| Ireland                | <0.1<br>(<0.1–<0.1)     | <0.1<br>(<0.1–<0.1) | 26.5<br>(20.0–33.3) | 25.0<br>(18.0–31.9) | 2.7<br>(1.2–5.1)           | 2.7<br>(1.2–5.1)   | 1.0<br>(0.4–1.6) | 1.0<br>(0.4–1.6) | 7.8<br>(4.5–11.4)  | 7.7<br>(4.4–11.3)  | 16.6<br>(9.5–23.3)  | 9.8<br>(4.1–15.5) | <0.1<br>(0.0–0.0)   | <0.1<br>(0.0–0.0)   | 25.7<br>(14.4–37.2) | 25.7<br>(14.4–37.2) |
| Israel                 | <0.1<br>(<0.1–<0.1)     | <0.1<br>(<0.1–0.1)  | 25.1<br>(19.4–30.7) | 14.0<br>(9.9–18.8)  | 10.1<br>(6.1–15.3)         | 10.1<br>(6.1–15.3) | 1.0<br>(0.4–1.7) | 1.0<br>(0.4–1.7) | 8.9<br>(5.1–12.7)  | 10.9<br>(6.4–15.6) | 4.4<br>(0.0–9.3)    | 1.2<br>(0.0–3.8)  | 2.1<br>(0.8–3.9)    | 2.1<br>(0.8–3.9)    | 3.5<br>(<0.1–10.4)  | 3.5<br>(<0.1–10.4)  |
| Italy                  | <0.1<br>(<0.1–0.1)      | <0.1<br>(<0.1–0.1)  | 28.3<br>(21.7–34.9) | 20.6<br>(14.9–26.6) | 7.9<br>(4.7–12.2)          | 7.8<br>(4.6–12.1)  | 1.0<br>(0.4–1.7) | 1.0<br>(0.4–1.7) | 10.9<br>(6.7–15.3) | 12.6<br>(7.7–17.6) | 13.8<br>(6.5–20.4)  | 6.1<br>(1.8–10.5) | 0.1<br>(<0.1–0.2)   | 0.1<br>(<0.1–0.2)   | 17.4<br>(13.1–21.6) | 17.2<br>(13.0–21.4) |

|                                    | Household air pollution  |                           | Smoking                     |                          | Ambient particulate matter |                           | Handwashing               |                           | Secondhand smoke         |                          | Alcohol use                |                          | High temperature             |                              | Low temperature          |                          |
|------------------------------------|--------------------------|---------------------------|-----------------------------|--------------------------|----------------------------|---------------------------|---------------------------|---------------------------|--------------------------|--------------------------|----------------------------|--------------------------|------------------------------|------------------------------|--------------------------|--------------------------|
|                                    | M                        | F                         | M                           | F                        | M                          | F                         | M                         | F                         | M                        | F                        | M                          | F                        | M                            | F                            | M                        | F                        |
| Luxembourg                         | <0.1<br>(<0.1–<0.1)      | <0.1<br>(<0.1–<0.1)       | 29.3<br>(21.9–36.3)         | 23.4<br>(17.1–29.9)      | 4.2<br>(2.2–7.3)           | 4.2<br>(2.2–7.3)          | 1.0<br>(0.4–1.6)          | 1.0<br>(0.4–1.6)          | 10.2<br>(6.3–14.4)       | 10.9<br>(6.6–15.3)       | 18.4<br>(10.2–25.0)        | 6.3<br>(0.8–11.3)        | <0.1<br>(<0.1–0.1)           | <0.1<br>(<0.1–0.1)           | 23.1<br>(13.3–33.6)      | 23.1<br>(13.3–33.6)      |
| Malta                              | <0.1<br>(<0.1–<0.1)      | <0.1<br>(<0.1–0.1)        | 28.3<br>(22.2–34.1)         | 23.7<br>(18.2–29.4)      | 6.1<br>(3.4–9.9)           | 6.1<br>(3.4–9.9)          | 1.0<br>(0.4–1.7)          | 1.0<br>(0.4–1.7)          | 10.4<br>(6.5–14.8)       | 12.1<br>(7.6–16.8)       | 13.0<br>(5.9–19.9)         | 3.2<br>(0.0–7.5)         | 0.3<br>(<0.1–0.9)            | 0.3<br>(<0.1–0.9)            | 3.6<br>(<0.1–15.0)       | 3.6<br>(<0.1–15.0)       |
| Monaco                             | <0.1<br>(<0.1–<0.1)      | <0.1<br>(<0.1–<0.1)       | 30.4<br>(22.2–37.7)         | 23.8<br>(16.0–31.5)      | 5.3<br>(2.5–9.2)           | 5.3<br>(2.5–9.2)          | 1.0<br>(0.4–1.6)          | 1.0<br>(0.4–1.6)          | 10.2<br>(6.2–14.4)       | 11.4<br>(7.1–16.2)       | 9.0<br>(0.0–22.5)          | 3.8<br>(0.0–12.6)        | <0.1<br>(<0.1–0.1)           | <0.1<br>(<0.1–0.1)           | 15.4<br>(11.9–19.0)      | 15.4<br>(11.9–19.0)      |
| Netherlands                        | <0.1<br>(<0.1–<0.1)      | <0.1<br>(<0.1–<0.1)       | 28.3<br>(21.7–35.4)         | 22.6<br>(16.5–28.9)      | 5.5<br>(3.1–9.0)           | 5.5<br>(3.1–9.0)          | 1.0<br>(0.4–1.6)          | 1.0<br>(0.4–1.6)          | 8.9<br>(5.3–13.2)        | 9.4<br>(5.6–13.6)        | 12.3<br>(5.3–19.0)         | 6.1<br>(0.9–11.2)        | <0.1<br>(<0.1–0.1)           | <0.1<br>(<0.1–0.1)           | 23.6<br>(13.4–33.5)      | 23.6<br>(13.4–33.5)      |
| Norway                             | <0.1<br>(<0.1–<0.1)      | <0.1<br>(<0.1–<0.1)       | 25.1<br>(19.2–31.2)         | 18.0<br>(12.7–23.5)      | 1.8<br>(0.6–3.9)           | 1.8<br>(0.6–3.9)          | 1.0<br>(0.4–1.6)          | 1.0<br>(0.4–1.6)          | 8.8<br>(5.3–13.0)        | 9.2<br>(5.4–13.0)        | 10.8<br>(3.8–16.8)         | 4.2<br>(0.0–9.2)         | <0.1<br>(<0.1–0.1)           | <0.1<br>(<0.1–0.1)           | 19.0<br>(5.7–35.8)       | 18.9<br>(5.8–35.9)       |
| Portugal                           | <0.1<br>(<0.1–0.1)       | 0.1<br>(<0.1–0.2)         | 32.3<br>(24.7–39.6)         | 19.0<br>(12.6–25.7)      | 3.0<br>(1.4–5.5)           | 3.0<br>(1.4–5.5)          | 1.1<br>(0.4–1.8)          | 1.1<br>(0.4–1.8)          | 7.9<br>(4.4–11.6)        | 10.5<br>(6.0–15.2)       | 18.7<br>(10.5–25.6)        | 5.7<br>(1.6–9.8)         | 0.2<br>(<0.1–0.3)            | 0.2<br>(<0.1–0.3)            | 15.3<br>(11.7–19.2)      | 15.3<br>(11.7–19.2)      |
| San Marino                         | <0.1<br>(<0.1–<0.1)      | <0.1<br>(<0.1–<0.1)       | 27.4<br>(20.9–34.4)         | 20.6<br>(14.7–27.5)      | 4.1<br>(1.5–7.9)           | 4.1<br>(1.5–7.9)          | 1.0<br>(0.4–1.7)          | 1.0<br>(0.4–1.7)          | 11.2<br>(7.2–16.1)       | 12.4<br>(8.0–16.9)       | 14.9<br>(0.0–24.6)         | 7.0<br>(0.0–14.6)        | 0.1<br>(<0.1–0.2)            | 0.1<br>(<0.1–0.2)            | 15.7<br>(12.5–19.0)      | 15.7<br>(12.5–19.0)      |
| Spain                              | 0.1<br>(<0.1–0.2)        | 0.1<br>(<0.1–0.3)         | 36.2<br>(28.5–43.9)         | 30.0<br>(22.3–37.7)      | 4.0<br>(2.1–6.9)           | 4.0<br>(2.1–6.9)          | 1.0<br>(0.4–1.7)          | 1.0<br>(0.4–1.7)          | 10.1<br>(6.0–14.3)       | 11.8<br>(7.1–16.6)       | 15.9<br>(8.1–22.7)         | 6.3<br>(1.5–11.3)        | 0.2<br>(<0.1–0.5)            | 0.2<br>(<0.1–0.5)            | 17.3<br>(13.3–21.5)      | 17.3<br>(13.3–21.5)      |
| Sweden                             | <0.1<br>(<0.1–<0.1)      | <0.1<br>(<0.1–<0.1)       | 18.2<br>(13.6–23.2)         | 19.5<br>(14.5–24.5)      | 1.2<br>(0.3–3.0)           | 1.2<br>(0.3–3.0)          | 1.0<br>(0.4–1.7)          | 1.0<br>(0.4–1.7)          | 9.5<br>(6.0–13.4)        | 8.7<br>(5.6–12.6)        | 10.2<br>(3.4–16.7)         | 5.9<br>(0.7–11.2)        | <0.1<br>(<0.1–0.1)           | <0.1<br>(<0.1–0.1)           | 18.5<br>(5.5–32.9)       | 18.5<br>(5.3–33.0)       |
| Switzerland                        | <0.1<br>(<0.1–<0.1)      | <0.1<br>(<0.1–<0.1)       | 29.1<br>(22.4–35.8)         | 22.6<br>(16.3–28.9)      | 4.1<br>(2.2–7.0)           | 4.1<br>(2.2–7.0)          | 1.0<br>(0.4–1.6)          | 1.0<br>(0.4–1.6)          | 9.0<br>(5.2–13.0)        | 9.8<br>(5.9–14.1)        | 13.4<br>(5.6–20.0)         | 8.4<br>(2.3–14.0)        | <0.1<br>(<0.1–<0.1)          | <0.1<br>(<0.1–<0.1)          | 21.1<br>(11.3–32.9)      | 21.1<br>(11.3–32.9)      |
| United Kingdom                     | <0.1<br>(<0.1–<0.1)      | <0.1<br>(<0.1–<0.1)       | 29.0<br>(21.6–36.2)         | 25.4<br>(18.4–32.4)      | 4.2<br>(2.2–7.2)           | 4.2<br>(2.2–7.2)          | 1.0<br>(0.4–1.7)          | 1.0<br>(0.4–1.7)          | 8.7<br>(5.0–12.6)        | 9.6<br>(5.8–13.8)        | 14.8<br>(7.2–21.1)         | 7.7<br>(2.2–13.1)        | <0.1<br>(<0.1–<0.1)          | <0.1<br>(<0.1–<0.1)          | 24.8<br>(15.8–34.9)      | 24.8<br>(15.9–34.8)      |
| <b>Latin America and Caribbean</b> | <b>3.8<br/>(1.9–6.6)</b> | <b>6.7<br/>(3.7–10.4)</b> | <b>15.0<br/>(10.2–19.8)</b> | <b>7.2<br/>(4.7–9.8)</b> | <b>8.6<br/>(5.5–12.8)</b>  | <b>8.5<br/>(5.5–12.4)</b> | <b>6.8<br/>(2.8–10.8)</b> | <b>7.4<br/>(3.1–11.6)</b> | <b>5.8<br/>(3.2–8.9)</b> | <b>6.1<br/>(3.2–9.2)</b> | <b>12.1<br/>(6.3–17.2)</b> | <b>3.0<br/>(0.7–5.3)</b> | <b>1.4<br/>(&lt;0.1–4.3)</b> | <b>1.4<br/>(&lt;0.1–4.2)</b> | <b>3.3<br/>(1.6–5.1)</b> | <b>3.1<br/>(1.4–4.8)</b> |
| Andean Latin America               | 3.4<br>(1.4–6.3)         | 4.9<br>(2.2–8.7)          | 7.8<br>(4.4–11.7)           | 2.7<br>(1.3–4.4)         | 13.6<br>(8.4–20.8)         | 13.2<br>(8.3–19.8)        | 7.7<br>(3.2–12.3)         | 7.8<br>(3.2–12.4)         | 3.1<br>(1.1–5.5)         | 3.3<br>(1.2–6.1)         | 11.4<br>(4.7–16.9)         | 2.2<br>(0.0–5.4)         | 0.4<br>(<0.1–1.3)            | 0.5<br>(<0.1–1.4)            | 9.1<br>(5.6–12.8)        | 9.1<br>(5.7–12.8)        |
| Bolivia (Plurinational State of)   | 6.3<br>(2.7–12.1)        | 8.5<br>(4.0–14.7)         | 7.8<br>(4.6–11.5)           | 2.2<br>(0.9–3.8)         | 12.8<br>(7.4–20.2)         | 12.3<br>(7.3–19.3)        | 8.4<br>(3.5–13.2)         | 8.4<br>(3.5–13.2)         | 2.8<br>(1.0–5.4)         | 3.2<br>(1.2–6.0)         | 9.1<br>(3.2–15.0)          | 1.6<br>(0.0–4.6)         | 1.5<br>(0.5–2.7)             | 1.5<br>(0.5–2.7)             | 9.1<br>(5.9–12.6)        | 9.1<br>(5.9–12.6)        |
| Ecuador                            | 1.0<br>(0.3–2.3)         | 1.4<br>(0.5–3.2)          | 9.9<br>(5.1–14.8)           | 3.0<br>(1.5–4.8)         | 10.2<br>(5.4–16.5)         | 10.2<br>(5.5–16.4)        | 6.9<br>(2.8–11.0)         | 6.9<br>(2.8–11.0)         | 2.8<br>(1.0–5.3)         | 3.1<br>(1.1–5.9)         | 10.1<br>(4.9–14.9)         | 1.5<br>(0.0–3.4)         | 0.3<br>(<0.1–1.2)            | 0.3<br>(<0.1–1.2)            | 5.8<br>(3.6–8.1)         | 5.8<br>(3.6–8.1)         |
| Peru                               | 3.5<br>(1.4–6.8)         | 4.8<br>(2.1–8.9)          | 7.0<br>(3.9–10.6)           | 2.8<br>(1.4–4.6)         | 15.1<br>(9.3–23.0)         | 14.8<br>(9.3–22.3)        | 7.9<br>(3.3–12.5)         | 7.9<br>(3.3–12.5)         | 3.2<br>(1.2–5.9)         | 3.3<br>(1.3–6.1)         | 12.5<br>(5.1–19.1)         | 2.6<br>(0.0–6.7)         | 0.2<br>(<0.1–0.9)            | 0.2<br>(<0.1–0.9)            | 10.4<br>(6.0–15.2)       | 10.4<br>(6.0–15.2)       |
| Caribbean                          | 14.3<br>(7.4–23.2)       | 25.2<br>(15.7–35.5)       | 14.2<br>(9.9–19.0)          | 4.8<br>(3.1–6.9)         | 7.6<br>(3.6–13.6)          | 6.4<br>(3.1–11.6)         | 14.3<br>(6.4–22.3)        | 16.1<br>(7.1–24.4)        | 5.6<br>(3.0–8.4)         | 5.4<br>(2.8–8.1)         | 11.8<br>(6.0–16.9)         | 2.4<br>(0.5–4.5)         | 0.9<br>(<0.1–2.9)            | 0.9<br>(<0.1–2.9)            | <0.1<br>(<0.1–1.2)       | <0.1<br>(<0.1–1.3)       |
| Antigua and Barbuda                | 0.1<br>(<0.1–0.3)        | 0.2<br>(<0.1–0.4)         | 12.1<br>(8.3–16.2)          | 5.7<br>(3.5–8.8)         | 8.7<br>(2.7–18.4)          | 8.7<br>(2.7–18.4)         | 7.5<br>(3.1–11.9)         | 7.5<br>(3.1–11.9)         | 6.6<br>(3.9–9.7)         | 6.9<br>(4.0–10.2)        | 11.6<br>(5.1–17.0)         | 2.9<br>(0.1–5.9)         | 0.4<br>(<0.1–2.3)            | 0.4<br>(<0.1–2.3)            | 0.3<br>(<0.1–1.7)        | 0.3<br>(<0.1–1.7)        |



|                                  | Household air pollution |                     | Smoking             |                     | Ambient particulate matter |                    | Handwashing        |                    | Secondhand smoke  |                    | Alcohol use        |                  | High temperature  |                   | Low temperature    |                    |
|----------------------------------|-------------------------|---------------------|---------------------|---------------------|----------------------------|--------------------|--------------------|--------------------|-------------------|--------------------|--------------------|------------------|-------------------|-------------------|--------------------|--------------------|
|                                  | M                       | F                   | M                   | F                   | M                          | F                  | M                  | F                  | M                 | F                  | M                  | F                | M                 | F                 | M                  | F                  |
| Bahamas                          | 0.1<br>(<0.1–0.4)       | 0.2<br>(<0.1–0.5)   | 12.5<br>(8.5–16.9)  | 4.2<br>(2.5–6.6)    | 7.6<br>(1.7–16.4)          | 7.6<br>(1.7–16.4)  | 6.3<br>(2.6–10.2)  | 6.3<br>(2.6–10.2)  | 6.8<br>(4.0–9.8)  | 8.1<br>(4.8–11.6)  | 9.6<br>(0.6–17.5)  | 2.2<br>(0.0–6.0) | 1.6<br>(<0.1–4.5) | 1.6<br>(<0.1–4.5) | 0.3<br>(<0.1–2.0)  | 0.3<br>(<0.1–2.0)  |
| Barbados                         | <0.1<br>(<0.1–<0.1)     | <0.1<br>(<0.1–<0.1) | 16.8<br>(11.9–22.3) | 5.7<br>(3.7–8.2)    | 10.8<br>(3.8–21.4)         | 10.8<br>(3.8–21.4) | 7.1<br>(2.9–11.4)  | 7.1<br>(2.9–11.4)  | 5.6<br>(3.1–8.3)  | 5.6<br>(3.2–8.4)   | 16.6<br>(9.3–22.5) | 2.3<br>(0.0–5.3) | 1.2<br>(<0.1–3.9) | 1.2<br>(<0.1–3.9) | 0.4<br>(<0.1–2.0)  | 0.4<br>(<0.1–2.0)  |
| Belize                           | 2.9<br>(1.1–6.0)        | 4.0<br>(1.6–7.8)    | 13.6<br>(9.0–18.4)  | 3.0<br>(1.7–4.6)    | 10.6<br>(3.3–20.8)         | 10.4<br>(3.5–20.5) | 9.5<br>(4.0–15.0)  | 9.5<br>(4.0–15.0)  | 5.9<br>(3.2–8.9)  | 8.0<br>(4.4–11.9)  | 12.6<br>(6.0–18.2) | 2.2<br>(0.3–4.1) | 1.7<br>(<0.1–4.2) | 1.7<br>(<0.1–4.2) | 0.1<br>(<0.1–1.3)  | 0.1<br>(<0.1–1.3)  |
| Cuba                             | 0.2<br>(0.1–0.6)        | 0.4<br>(0.1–0.9)    | 27.7<br>(20.9–34.4) | 15.6<br>(10.7–21.2) | 8.8<br>(3.7–16.9)          | 8.8<br>(3.7–16.9)  | 6.0<br>(2.5–9.6)   | 6.0<br>(2.5–9.6)   | 8.3<br>(4.8–12.1) | 10.5<br>(6.4–14.9) | 11.4<br>(5.0–16.8) | 2.7<br>(0.1–5.6) | 1.5<br>(<0.1–4.0) | 1.5<br>(<0.1–4.0) | 0.2<br>(<0.1–1.6)  | 0.2<br>(<0.1–1.6)  |
| Dominica                         | 1.0<br>(0.3–2.3)        | 1.4<br>(0.4–3.3)    | 14.2<br>(9.5–19.6)  | 4.5<br>(2.5–6.9)    | 9.4<br>(3.2–19.0)          | 9.4<br>(3.3–18.9)  | 8.3<br>(3.5–13.2)  | 8.3<br>(3.5–13.2)  | 5.1<br>(2.8–7.8)  | 6.0<br>(3.2–9.1)   | 13.2<br>(6.7–19.2) | 3.7<br>(0.6–7.1) | 1.1<br>(<0.1–3.5) | 1.1<br>(<0.1–3.5) | 0.3<br>(<0.1–3.2)  | 0.3<br>(<0.1–3.2)  |
| Dominican Republic               | 1.9<br>(0.7–4.1)        | 2.6<br>(1.0–5.6)    | 12.0<br>(8.5–16.1)  | 6.1<br>(3.9–8.6)    | 8.9<br>(3.3–17.8)          | 8.8<br>(3.4–17.7)  | 16.0<br>(7.1–24.3) | 16.0<br>(7.1–24.3) | 6.8<br>(4.0–9.9)  | 6.3<br>(3.6–9.2)   | 10.5<br>(4.5–16.1) | 4.2<br>(0.9–7.4) | 0.6<br>(<0.1–2.2) | 0.6<br>(<0.1–2.2) | <0.1<br>(<0.1–1.7) | <0.1<br>(<0.1–1.7) |
| Grenada                          | 0.4<br>(0.1–0.9)        | 0.6<br>(0.2–1.3)    | 13.1<br>(8.5–17.9)  | 3.9<br>(2.1–6.1)    | 10.8<br>(3.4–21.5)         | 10.8<br>(3.5–21.4) | 7.6<br>(3.2–12.2)  | 7.6<br>(3.2–12.2)  | 4.7<br>(2.4–7.3)  | 5.7<br>(2.8–9.0)   | 15.2<br>(8.1–21.1) | 4.7<br>(1.4–8.2) | 1.4<br>(<0.1–4.2) | 1.4<br>(<0.1–4.2) | 0.3<br>(<0.1–1.8)  | 0.3<br>(<0.1–1.8)  |
| Guyana                           | 1.1<br>(0.4–2.3)        | 1.6<br>(0.6–3.2)    | 17.1<br>(11.6–22.6) | 2.9<br>(1.6–4.6)    | 10.1<br>(3.2–20.5)         | 10.0<br>(3.2–20.4) | 14.1<br>(6.1–21.9) | 14.1<br>(6.1–21.9) | 5.0<br>(2.6–7.7)  | 7.7<br>(4.0–11.9)  | 14.8<br>(7.8–21.0) | 0.7<br>(0.0–2.4) | 0.9<br>(<0.1–2.8) | 0.9<br>(<0.1–2.8) | <0.1<br>(<0.1–1.3) | <0.1<br>(<0.1–1.3) |
| Haiti                            | 34.0<br>(20.8–48.1)     | 40.7<br>(27.5–53.2) | 8.2<br>(4.9–11.8)   | 2.3<br>(1.2–3.8)    | 6.2<br>(2.6–12.0)          | 5.2<br>(2.2–10.0)  | 19.5<br>(8.7–29.2) | 19.5<br>(8.7–29.2) | 3.5<br>(1.6–5.8)  | 3.6<br>(1.7–6.0)   | 12.4<br>(6.5–17.7) | 1.9<br>(0.4–3.6) | 0.8<br>(<0.1–3.0) | 0.8<br>(<0.1–3.0) | <0.1<br>(<0.1–1.3) | <0.1<br>(<0.1–1.3) |
| Jamaica                          | 1.4<br>(0.4–3.1)        | 1.9<br>(0.6–4.4)    | 19.3<br>(14.0–24.5) | 5.6<br>(3.4–8.1)    | 7.7<br>(3.9–13.2)          | 7.7<br>(4.0–13.0)  | 11.2<br>(4.8–17.4) | 11.2<br>(4.8–17.4) | 7.0<br>(4.0–10.3) | 8.9<br>(5.1–12.7)  | 8.5<br>(2.9–13.8)  | 1.6<br>(0.0–4.1) | 1.2<br>(<0.1–4.3) | 1.2<br>(<0.1–4.3) | 0.1<br>(<0.1–1.1)  | 0.1<br>(<0.1–1.1)  |
| Saint Kitts and Nevis            | 0.2<br>(<0.1–0.7)       | 0.3<br>(0.1–1.0)    | 12.0<br>(7.5–16.7)  | 2.5<br>(1.3–4.2)    | 3.5<br>(1.3–6.7)           | 3.5<br>(1.4–6.7)   | 7.6<br>(3.2–12.1)  | 7.6<br>(3.2–12.1)  | 6.4<br>(3.5–9.8)  | 7.5<br>(4.3–11.2)  | 5.5<br>(0.0–17.0)  | 1.3<br>(0.0–5.8) | 1.0<br>(<0.1–3.9) | 1.0<br>(<0.1–3.9) | 0.4<br>(<0.1–2.3)  | 0.4<br>(<0.1–2.3)  |
| Saint Lucia                      | 0.5<br>(0.2–1.1)        | 0.7<br>(0.2–1.6)    | 17.0<br>(11.7–22.7) | 5.0<br>(2.8–7.6)    | 10.7<br>(3.7–21.1)         | 10.7<br>(3.8–21.0) | 5.7<br>(2.3–9.2)   | 5.7<br>(2.3–9.2)   | 5.5<br>(2.9–8.4)  | 6.1<br>(3.3–9.1)   | 15.6<br>(8.4–21.8) | 4.6<br>(0.5–8.9) | 1.7<br>(<0.1–4.8) | 1.7<br>(<0.1–4.8) | 0.3<br>(<0.1–1.9)  | 0.3<br>(<0.1–1.9)  |
| Saint Vincent and the Grenadines | 0.6<br>(0.2–1.4)        | 0.9<br>(0.3–2.0)    | 15.8<br>(10.3–21.6) | 3.5<br>(1.9–5.4)    | 10.6<br>(3.3–21.3)         | 10.6<br>(3.4–21.1) | 9.1<br>(3.8–14.3)  | 9.1<br>(3.8–14.3)  | 5.1<br>(2.7–7.9)  | 6.7<br>(3.5–10.0)  | 14.3<br>(7.5–19.9) | 4.3<br>(1.0–7.6) | 1.3<br>(<0.1–4.0) | 1.3<br>(<0.1–4.0) | 0.4<br>(<0.1–2.0)  | 0.4<br>(<0.1–2.0)  |
| Suriname                         | 1.6<br>(0.5–3.7)        | 2.3<br>(0.8–4.9)    | 24.9<br>(18.3–31.8) | 7.2<br>(4.3–10.8)   | 10.7<br>(4.1–20.6)         | 10.6<br>(4.2–20.4) | 9.3<br>(3.9–14.9)  | 9.3<br>(3.9–14.9)  | 7.2<br>(4.0–10.7) | 11.6<br>(6.7–16.9) | 11.4<br>(5.0–17.0) | 2.7<br>(0.0–5.5) | 1.0<br>(<0.1–3.0) | 1.0<br>(<0.1–3.0) | 0.3<br>(<0.1–1.6)  | 0.3<br>(<0.1–1.6)  |
| Trinidad and Tobago              | <0.1<br>(<0.1–<0.1)     | <0.1<br>(<0.1–<0.1) | 19.4<br>(12.9–26.1) | 8.4<br>(5.0–12.4)   | 11.0<br>(3.1–22.8)         | 11.0<br>(3.1–22.8) | 6.8<br>(2.8–10.9)  | 6.8<br>(2.8–10.9)  | 5.9<br>(3.1–9.2)  | 8.6<br>(4.6–13.1)  | 11.5<br>(5.2–16.7) | 3.2<br>(0.0–6.7) | 0.4<br>(<0.1–2.6) | 0.4<br>(<0.1–2.6) | 0.2<br>(<0.1–1.2)  | 0.2<br>(<0.1–1.2)  |
| Central Latin America            | 4.7<br>(2.2–8.1)        | 6.9<br>(3.6–11.2)   | 13.6<br>(8.1–19.1)  | 4.6<br>(2.5–6.9)    | 10.7<br>(6.9–15.7)         | 10.5<br>(6.9–15.3) | 5.9<br>(2.4–9.4)   | 6.0<br>(2.5–9.7)   | 3.4<br>(1.3–6.3)  | 4.5<br>(1.8–8.0)   | 12.0<br>(6.4–16.8) | 2.3<br>(0.4–4.3) | 1.2<br>(0.2–2.9)  | 1.2<br>(0.1–3.2)  | 4.8<br>(2.6–7.1)   | 4.1<br>(2.2–6.2)   |
| Colombia                         | 1.8<br>(0.7–4.0)        | 2.5<br>(0.9–5.2)    | 11.7<br>(7.3–16.3)  | 5.4<br>(2.9–8.1)    | 11.2<br>(6.4–17.6)         | 11.1<br>(6.5–17.4) | 6.1<br>(2.5–9.9)   | 6.1<br>(2.5–9.9)   | 4.8<br>(2.3–7.9)  | 5.6<br>(2.7–9.1)   | 11.9<br>(5.9–16.9) | 1.9<br>(0.0–3.9) | 1.0<br>(<0.1–3.4) | 1.0<br>(<0.1–3.4) | 3.4<br>(1.8–5.1)   | 3.4<br>(1.8–5.1)   |
| Costa Rica                       | 0.8<br>(0.3–2.0)        | 1.2<br>(0.4–2.7)    | 17.1<br>(11.9–22.5) | 8.0<br>(4.9–11.6)   | 8.8<br>(5.2–13.8)          | 8.8<br>(5.2–13.7)  | 6.8<br>(2.8–10.9)  | 6.8<br>(2.8–10.9)  | 6.7<br>(3.8–9.9)  | 8.5<br>(4.8–12.5)  | 10.7<br>(4.6–15.8) | 1.8<br>(0.0–4.4) | 0.3<br>(<0.1–2.2) | 0.3<br>(<0.1–2.2) | 0.6<br>(<0.1–2.7)  | 0.6<br>(<0.1–2.7)  |

|                                       | Household air pollution  |                          | Smoking                     |                          | Ambient particulate matter  |                             | Handwashing               |                           | Secondhand smoke          |                             | Alcohol use              |                          | High temperature         |                          | Low temperature           |                           |
|---------------------------------------|--------------------------|--------------------------|-----------------------------|--------------------------|-----------------------------|-----------------------------|---------------------------|---------------------------|---------------------------|-----------------------------|--------------------------|--------------------------|--------------------------|--------------------------|---------------------------|---------------------------|
|                                       | M                        | F                        | M                           | F                        | M                           | F                           | M                         | F                         | M                         | F                           | M                        | F                        | M                        | F                        | M                         | F                         |
| El Salvador                           | 3.1<br>(1.2–5.9)         | 4.3<br>(1.9–7.6)         | 14.4<br>(9.4–19.7)          | 3.7<br>(2.3–5.5)         | 11.2<br>(5.9–18.1)          | 11.0<br>(6.0–17.7)          | 9.0<br>(3.8–14.4)         | 9.0<br>(3.8–14.4)         | 3.9<br>(2.0–6.2)          | 4.8<br>(2.5–7.3)            | 8.7<br>(3.7–13.0)        | 1.4<br>(0.0–3.0)         | 1.4<br>(<0.1–6.7)        | 1.4<br>(<0.1–6.7)        | <0.1<br>(<0.1–0.6)        | <0.1<br>(<0.1–0.6)        |
| Guatemala                             | 14.5<br>(6.9–24.6)       | 18.6<br>(9.8–30.0)       | 11.5<br>(6.5–16.6)          | 2.5<br>(1.3–4.0)         | 11.9<br>(7.3–17.7)          | 11.0<br>(6.8–16.2)          | 7.6<br>(3.2–12.1)         | 7.6<br>(3.2–12.1)         | 3.1<br>(1.2–5.5)          | 4.1<br>(1.6–7.4)            | 7.8<br>(3.6–12.1)        | 0.9<br>(0.0–2.1)         | 1.7<br>(0.5–3.5)         | 1.7<br>(0.5–3.5)         | 1.5<br>(<0.1–3.2)         | 1.5<br>(<0.1–3.2)         |
| Honduras                              | 18.1<br>(9.7–29.1)       | 22.9<br>(13.1–34.0)      | 17.8<br>(12.4–23.4)         | 3.3<br>(1.9–5.3)         | 9.5<br>(5.9–14.3)           | 8.5<br>(5.3–12.8)           | 5.4<br>(2.2–8.6)          | 5.4<br>(2.2–8.6)          | 5.4<br>(2.8–8.3)          | 8.0<br>(4.3–12.0)           | 8.6<br>(4.4–12.2)        | 0.7<br>(0.1–1.4)         | 0.7<br>(<0.1–2.6)        | 0.7<br>(<0.1–2.6)        | <0.1<br>(<0.1–2.4)        | <0.1<br>(<0.1–2.4)        |
| Mexico                                | 2.5<br>(1.1–4.7)         | 4.0<br>(1.9–7.1)         | 14.1<br>(7.8–20.4)          | 4.8<br>(2.2–7.9)         | 10.3<br>(6.3–15.5)          | 10.1<br>(6.3–14.9)          | 5.0<br>(2.0–8.1)          | 5.1<br>(2.1–8.2)          | 2.7<br>(0.8–5.6)          | 3.6<br>(1.0–7.5)            | 13.5<br>(7.3–19.0)       | 3.0<br>(0.5–5.8)         | 1.2<br>(0.4–1.9)         | 1.1<br>(0.3–2.0)         | 7.7<br>(4.9–10.8)         | 7.4<br>(4.6–10.4)         |
| Nicaragua                             | 14.3<br>(6.6–24.4)       | 18.0<br>(9.4–29.1)       | 12.1<br>(7.7–16.8)          | 3.6<br>(2.0–5.5)         | 9.1<br>(5.3–14.6)           | 8.5<br>(4.9–13.5)           | 8.1<br>(3.4–12.8)         | 8.1<br>(3.4–12.8)         | 5.6<br>(2.6–8.8)          | 6.5<br>(3.2–10.4)           | 10.4<br>(5.4–14.5)       | 1.1<br>(0.2–2.1)         | 0.8<br>(<0.1–4.9)        | 0.8<br>(<0.1–4.9)        | <0.1<br>(<0.1–1.1)        | <0.1<br>(<0.1–1.1)        |
| Panama                                | 1.3<br>(0.4–2.9)         | 1.9<br>(0.6–3.9)         | 9.5<br>(6.4–12.9)           | 3.0<br>(1.8–4.6)         | 6.5<br>(3.3–10.9)           | 6.5<br>(3.3–10.9)           | 6.1<br>(2.5–9.8)          | 6.1<br>(2.5–9.8)          | 5.0<br>(2.9–7.5)          | 5.6<br>(3.1–8.3)            | 14.4<br>(7.8–19.6)       | 3.4<br>(0.9–5.8)         | 0.6<br>(<0.1–2.3)        | 0.6<br>(<0.1–2.3)        | <0.1<br>(<0.1–1.0)        | <0.1<br>(<0.1–1.0)        |
| Venezuela<br>(Bolivarian Republic of) | 0.1<br>(<0.1–0.2)        | 0.1<br>(<0.1–0.2)        | 16.2<br>(10.1–22.4)         | 6.6<br>(3.8–10.0)        | 11.1<br>(5.9–18.6)          | 11.1<br>(5.9–18.6)          | 5.7<br>(2.4–9.2)          | 5.7<br>(2.4–9.2)          | 5.1<br>(2.2–8.4)          | 6.3<br>(2.9–10.3)           | 13.3<br>(7.3–18.8)       | 2.7<br>(0.5–5.3)         | 1.2<br>(<0.1–9.4)        | 1.2<br>(<0.1–9.4)        | 0.1<br>(<0.1–1.7)         | 0.1<br>(<0.1–1.7)         |
| Tropical Latin America                | 1.6<br>(0.6–3.4)         | 2.5<br>(0.9–4.8)         | 18.3<br>(13.6–23.5)         | 11.5<br>(8.0–15.4)       | 5.7<br>(3.2–9.2)            | 5.6<br>(3.3–9.1)            | 6.1<br>(2.5–9.9)          | 6.2<br>(2.5–10.0)         | 8.6<br>(5.1–12.4)         | 8.6<br>(5.1–12.3)           | 12.5<br>(6.5–17.8)       | 4.2<br>(1.4–6.9)         | 1.9<br>(<0.1–6.8)        | 1.8<br>(<0.1–7.2)        | 1.0<br>(<0.1–3.0)         | 1.0<br>(<0.1–2.9)         |
| Brazil                                | 1.5<br>(0.5–3.3)         | 2.3<br>(0.9–4.6)         | 18.3<br>(13.5–23.6)         | 11.6<br>(8.1–15.5)       | 5.7<br>(3.2–9.2)            | 5.6<br>(3.3–9.1)            | 6.1<br>(2.5–9.8)          | 6.2<br>(2.5–10.0)         | 8.6<br>(5.1–12.4)         | 8.6<br>(5.1–12.3)           | 12.5<br>(6.4–17.7)       | 4.2<br>(1.4–7.0)         | 1.8<br>(<0.1–6.8)        | 1.8<br>(<0.1–7.2)        | 1.0<br>(<0.1–2.9)         | 1.0<br>(<0.1–2.9)         |
| Paraguay                              | 6.4<br>(2.4–12.9)        | 8.8<br>(3.8–16.1)        | 18.6<br>(13.0–24.6)         | 5.5<br>(3.2–8.4)         | 6.3<br>(3.5–10.6)           | 6.1<br>(3.6–10.3)           | 7.9<br>(3.3–12.7)         | 7.9<br>(3.3–12.7)         | 8.5<br>(4.8–12.3)         | 9.3<br>(5.3–13.5)           | 15.7<br>(8.3–21.9)       | 2.3<br>(0.0–5.5)         | 5.2<br>(2.9–7.6)         | 5.2<br>(2.9–7.6)         | 0.9<br>(<0.1–5.0)         | 0.9<br>(<0.1–5.0)         |
| <b>North Africa and Middle East</b>   | <b>4.9<br/>(2.8–7.5)</b> | <b>6.6<br/>(4.1–9.8)</b> | <b>24.0<br/>(19.1–28.9)</b> | <b>2.9<br/>(1.9–4.0)</b> | <b>21.2<br/>(14.9–28.3)</b> | <b>20.4<br/>(14.4–27.4)</b> | <b>7.0<br/>(3.0–11.1)</b> | <b>7.4<br/>(3.2–11.7)</b> | <b>9.1<br/>(5.7–12.7)</b> | <b>16.9<br/>(11.0–22.9)</b> | <b>1.2<br/>(0.4–2.0)</b> | <b>0.2<br/>(0.0–0.4)</b> | <b>6.1<br/>(3.7–8.6)</b> | <b>6.4<br/>(4.0–8.8)</b> | <b>6.5<br/>(2.4–10.7)</b> | <b>6.2<br/>(2.0–10.4)</b> |
| Afghanistan                           | 33.4<br>(20.6–45.2)      | 37.4<br>(25.1–48.6)      | 13.9<br>(9.9–18.4)          | 1.9<br>(1.1–3.1)         | 12.3<br>(5.9–20.6)          | 10.1<br>(4.6–17.8)          | 15.7<br>(6.8–23.8)        | 15.7<br>(6.8–23.8)        | 8.1<br>(4.8–11.7)         | 12.3<br>(7.4–17.5)          | 0.1<br>(0.0–0.5)         | <0.1<br>(0.0–0.1)        | 3.1<br>(1.9–4.2)         | 3.1<br>(1.9–4.2)         | 13.7<br>(9.0–19.6)        | 13.7<br>(9.0–19.6)        |
| Algeria                               | <0.1<br>(<0.1–0.1)       | 0.1<br>(<0.1–0.1)        | 22.8<br>(17.6–28.5)         | 1.7<br>(0.9–2.8)         | 16.6<br>(9.1–25.5)          | 16.6<br>(9.1–25.5)          | 4.9<br>(2.0–7.9)          | 4.9<br>(2.0–7.9)          | 11.1<br>(7.0–15.4)        | 18.8<br>(12.4–25.4)         | 2.1<br>(0.5–3.8)         | 0.2<br>(0.0–0.5)         | 9.2<br>(6.2–12.2)        | 9.2<br>(6.2–12.2)        | 4.3<br>(<0.1–10.1)        | 4.3<br>(<0.1–10.1)        |
| Bahrain                               | 0.1<br>(<0.1–0.2)        | 0.1<br>(<0.1–0.2)        | 21.6<br>(16.2–27.3)         | 3.1<br>(1.8–5.0)         | 26.5<br>(17.9–36.4)         | 26.5<br>(17.9–36.4)         | 4.6<br>(1.9–7.4)          | 4.6<br>(1.9–7.4)          | 9.6<br>(6.0–13.6)         | 12.5<br>(8.1–17.2)          | 3.0<br>(0.9–5.1)         | 0.3<br>(0.0–0.7)         | 11.6<br>(5.8–16.6)       | 11.6<br>(5.8–16.6)       | 2.0<br>(<0.1–10.1)        | 2.0<br>(<0.1–10.1)        |
| Egypt                                 | <0.1<br>(<0.1–<0.1)      | <0.1<br>(<0.1–0.1)       | 25.5<br>(19.9–31.2)         | 0.6<br>(0.3–1.0)         | 28.9<br>(19.3–40.0)         | 28.9<br>(19.3–40.0)         | 3.8<br>(1.5–6.3)          | 3.8<br>(1.5–6.3)          | 8.7<br>(5.2–12.6)         | 20.0<br>(12.8–26.7)         | 0.4<br>(0.0–1.2)         | <0.1<br>(0.0–0.1)        | 7.7<br>(4.8–10.9)        | 7.7<br>(4.8–10.9)        | 2.7<br>(<0.1–9.1)         | 2.7<br>(<0.1–9.1)         |
| Iran (Islamic Republic of)            | <0.1<br>(<0.1–0.1)       | 0.1<br>(<0.1–0.2)        | 20.2<br>(15.3–25.0)         | 3.0<br>(1.7–4.4)         | 19.1<br>(12.5–26.9)         | 19.1<br>(12.5–26.8)         | 4.3<br>(1.7–7.1)          | 4.3<br>(1.7–7.1)          | 8.2<br>(4.9–11.6)         | 15.5<br>(9.6–21.3)          | 2.1<br>(1.1–3.2)         | 0.3<br>(0.1–0.5)         | 3.5<br>(2.3–4.7)         | 3.6<br>(2.4–4.8)         | 12.8<br>(9.6–16.0)        | 12.6<br>(9.3–15.7)        |
| Iraq                                  | <0.1<br>(<0.1–0.1)       | 0.1<br>(<0.1–0.2)        | 25.0<br>(19.7–30.6)         | 1.6<br>(0.9–2.5)         | 22.7<br>(14.6–32.4)         | 22.7<br>(14.6–32.4)         | 2.7<br>(1.1–4.5)          | 2.7<br>(1.1–4.5)          | 10.6<br>(6.6–15.1)        | 17.7<br>(11.5–24.1)         | 1.0<br>(0.0–2.5)         | 0.1<br>(0.0–0.3)         | 10.8<br>(7.5–13.8)       | 10.8<br>(7.5–13.8)       | 4.7<br>(<0.1–10.6)        | 4.7<br>(<0.1–10.6)        |
| Jordan                                | <0.1<br>(<0.1–<0.1)      | <0.1<br>(<0.1–<0.1)      | 32.3<br>(26.2–38.7)         | 6.7<br>(4.3–9.6)         | 15.7<br>(9.8–23.4)          | 15.7<br>(9.8–23.4)          | 4.2<br>(1.7–6.9)          | 4.2<br>(1.7–6.9)          | 8.3<br>(5.0–11.9)         | 18.3<br>(11.5–25.0)         | 1.4<br>(0.0–3.2)         | 0.1<br>(0.0–0.4)         | 3.2<br>(1.7–4.9)         | 3.2<br>(1.7–4.9)         | 6.0<br>(<0.1–12.1)        | 6.0<br>(<0.1–12.1)        |

|                      | Household air pollution    |                             | Smoking                     |                          | Ambient particulate matter  |                             | Handwashing                |                            | Secondhand smoke         |                            | Alcohol use              |                              | High temperature          |                           | Low temperature              |                              |
|----------------------|----------------------------|-----------------------------|-----------------------------|--------------------------|-----------------------------|-----------------------------|----------------------------|----------------------------|--------------------------|----------------------------|--------------------------|------------------------------|---------------------------|---------------------------|------------------------------|------------------------------|
|                      | M                          | F                           | M                           | F                        | M                           | F                           | M                          | F                          | M                        | F                          | M                        | F                            | M                         | F                         | M                            | F                            |
| Kuwait               | <0.1<br>(<0.1–<0.1)        | <0.1<br>(<0.1–<0.1)         | 31.4<br>(25.4–37.5)         | 3.6<br>(2.2–5.5)         | 27.1<br>(18.5–36.9)         | 27.1<br>(18.5–36.9)         | 3.7<br>(1.5–6.0)           | 3.7<br>(1.5–6.0)           | 9.5<br>(5.9–13.4)        | 20.4<br>(13.6–27.4)        | 0.1<br>(0.0–0.5)         | <0.1<br>(0.0–0.1)            | 13.1<br>(7.6–18.0)        | 13.1<br>(7.6–18.0)        | 3.1<br>(<0.1–15.6)           | 3.1<br>(<0.1–15.6)           |
| Lebanon              | <0.1<br>(<0.1–0.1)         | 0.1<br>(<0.1–0.1)           | 25.6<br>(19.9–31.2)         | 13.5<br>(9.5–18.5)       | 14.9<br>(9.0–22.6)          | 14.9<br>(9.0–22.6)          | 5.0<br>(2.1–8.0)           | 5.0<br>(2.1–8.0)           | 13.8<br>(9.0–19.2)       | 18.6<br>(12.2–25.0)        | 2.4<br>(0.6–4.5)         | 0.2<br>(0.0–0.7)             | 0.1<br>(<0.1–0.2)         | 0.1<br>(<0.1–0.2)         | 14.0<br>(10.4–17.5)          | 14.0<br>(10.4–17.5)          |
| Libya                | <0.1<br>(<0.1–0.1)         | 0.1<br>(<0.1–0.1)           | 29.8<br>(23.7–36.0)         | 0.9<br>(0.5–1.5)         | 19.0<br>(11.0–29.3)         | 19.0<br>(11.0–29.3)         | 4.5<br>(1.9–7.4)           | 4.5<br>(1.9–7.4)           | 10.9<br>(6.9–15.2)       | 20.6<br>(13.9–27.4)        | 1.2<br>(0.1–1.9)         | 0.2<br>(<0.1–0.3)            | 8.2<br>(4.7–12.0)         | 8.2<br>(4.7–12.0)         | 2.8<br>(<0.1–9.8)            | 2.8<br>(<0.1–9.8)            |
| Morocco              | 0.9<br>(0.3–1.9)           | 1.3<br>(0.5–2.7)            | 20.6<br>(15.4–26.6)         | 1.2<br>(0.7–1.9)         | 17.4<br>(10.8–25.1)         | 17.3<br>(10.7–24.9)         | 7.6<br>(3.2–12.2)          | 7.6<br>(3.2–12.2)          | 7.8<br>(4.5–11.2)        | 12.6<br>(7.7–17.6)         | 1.5<br>(0.1–2.9)         | <0.1<br>(0.0–<0.1)           | 2.5<br>(1.6–3.4)          | 2.5<br>(1.6–3.4)          | 8.2<br>(4.8–11.8)            | 8.2<br>(4.8–11.8)            |
| Oman                 | 0.1<br>(<0.1–0.2)          | 0.1<br>(<0.1–0.3)           | 12.9<br>(9.3–17.0)          | 1.1<br>(0.6–1.7)         | 21.4<br>(12.7–31.3)         | 21.4<br>(12.7–31.3)         | 5.0<br>(2.0–8.2)           | 5.0<br>(2.0–8.2)           | 7.7<br>(4.7–11.2)        | 10.8<br>(7.0–15.2)         | 0.6<br>(0.0–1.6)         | <0.1<br>(0.0–0.2)            | 6.6<br>(<0.1–22.3)        | 6.6<br>(<0.1–22.3)        | 1.3<br>(<0.1–13.3)           | 1.3<br>(<0.1–13.3)           |
| Palestine            | 0.2<br>(0.1–0.5)           | 0.3<br>(0.1–0.6)            | 20.6<br>(15.4–26.0)         | 1.9<br>(1.1–3.0)         | 15.9<br>(9.5–24.7)          | 15.9<br>(9.5–24.7)          | 7.1<br>(3.0–11.4)          | 7.1<br>(3.0–11.4)          | 10.5<br>(6.6–14.7)       | 21.1<br>(13.8–28.4)        | 4.1<br>(2.3–6.0)         | 0.7<br>(0.3–1.2)             | 2.2<br>(0.9–4.0)          | 2.2<br>(0.9–4.0)          | 3.9<br>(<0.1–10.5)           | 3.9<br>(<0.1–10.5)           |
| Qatar                | <0.1<br>(<0.1–<0.1)        | <0.1<br>(<0.1–<0.1)         | 18.5<br>(14.2–23.6)         | 1.4<br>(0.8–2.2)         | 31.1<br>(22.0–41.1)         | 31.1<br>(22.0–41.1)         | 3.8<br>(1.5–6.3)           | 3.8<br>(1.5–6.3)           | 9.3<br>(5.7–13.0)        | 17.3<br>(11.3–23.3)        | 1.2<br>(0.0–2.8)         | 0.1<br>(0.0–0.4)             | 10.6<br>(3.7–19.5)        | 10.6<br>(3.7–19.5)        | 1.8<br>(<0.1–15.2)           | 1.8<br>(<0.1–15.2)           |
| Saudi Arabia         | <0.1<br>(<0.1–0.1)         | 0.1<br>(<0.1–0.2)           | 27.2<br>(20.7–34.0)         | 1.7<br>(0.9–2.8)         | 27.0<br>(18.4–37.3)         | 27.0<br>(18.4–37.3)         | 4.2<br>(1.7–6.7)           | 4.2<br>(1.7–6.7)           | 8.9<br>(5.7–12.6)        | 18.7<br>(12.8–25.0)        | 0.5<br>(0.0–1.5)         | 0.1<br>(0.0–0.3)             | 9.7<br>(5.9–14.1)         | 9.7<br>(5.9–14.1)         | 2.4<br>(<0.1–8.8)            | 2.4<br>(<0.1–8.8)            |
| Sudan                | 12.3<br>(6.2–21.1)         | 15.7<br>(8.6–24.8)          | 19.4<br>(14.3–25.3)         | 1.9<br>(1.1–3.0)         | 20.6<br>(11.9–31.4)         | 19.3<br>(11.3–29.6)         | 17.7<br>(7.9–26.7)         | 17.7<br>(7.9–26.7)         | 12.1<br>(8.1–16.7)       | 15.7<br>(10.9–21.2)        | <0.1<br>(0.0–0.2)        | <0.1<br>(0.0–<0.1)           | 8.3<br>(3.6–15.7)         | 8.3<br>(3.6–15.7)         | 1.5<br>(<0.1–7.2)            | 1.5<br>(<0.1–7.2)            |
| Syrian Arab Republic | <0.1<br>(<0.1–0.1)         | <0.1<br>(<0.1–0.1)          | 23.1<br>(17.8–29.1)         | 3.4<br>(1.8–5.5)         | 15.8<br>(9.6–23.6)          | 15.8<br>(9.6–23.6)          | 4.9<br>(2.0–7.9)           | 4.9<br>(2.0–7.9)           | 10.4<br>(6.4–14.5)       | 17.1<br>(11.0–23.3)        | 1.5<br>(0.5–2.5)         | 0.2<br>(<0.1–0.3)            | 4.4<br>(2.5–6.3)          | 4.4<br>(2.5–6.3)          | 7.7<br>(2.5–12.6)            | 7.7<br>(2.5–12.6)            |
| Tunisia              | <0.1<br>(<0.1–0.1)         | 0.1<br>(<0.1–0.1)           | 33.2<br>(26.8–39.5)         | 2.1<br>(1.2–3.2)         | 15.5<br>(8.9–24.1)          | 15.5<br>(8.9–24.1)          | 5.7<br>(2.4–9.2)           | 5.7<br>(2.4–9.2)           | 9.0<br>(5.5–12.8)        | 18.5<br>(11.9–24.8)        | 6.2<br>(3.2–9.2)         | 1.5<br>(0.3–2.8)             | 4.5<br>(2.3–6.7)          | 4.5<br>(2.3–6.7)          | 5.1<br>(<0.1–11.3)           | 5.1<br>(<0.1–11.3)           |
| Turkey               | 0.1<br>(<0.1–0.2)          | 0.1<br>(<0.1–0.2)           | 33.8<br>(27.6–40.5)         | 14.4<br>(10.0–19.1)      | 13.5<br>(8.4–20.4)          | 13.5<br>(8.4–20.3)          | 5.8<br>(2.4–9.3)           | 5.8<br>(2.4–9.3)           | 7.4<br>(4.5–10.7)        | 15.3<br>(9.5–21.2)         | 3.6<br>(1.3–5.8)         | 1.0<br>(0.0–2.3)             | 0.4<br>(0.1–0.7)          | 0.4<br>(0.1–0.7)          | 18.3<br>(13.7–23.4)          | 18.3<br>(13.7–23.4)          |
| United Arab Emirates | <0.1<br>(<0.1–<0.1)        | <0.1<br>(<0.1–<0.1)         | 25.8<br>(18.9–32.8)         | 4.6<br>(2.7–6.9)         | 21.1<br>(13.2–30.8)         | 21.1<br>(13.2–30.8)         | 3.8<br>(1.5–6.2)           | 3.8<br>(1.5–6.2)           | 10.0<br>(6.1–14.2)       | 16.8<br>(11.1–22.9)        | 2.0<br>(0.0–4.3)         | 0.3<br>(0.0–1.1)             | 8.4<br>(<0.1–25.0)        | 8.4<br>(<0.1–25.0)        | 1.9<br>(<0.1–18.2)           | 1.9<br>(<0.1–18.2)           |
| Yemen                | 12.6<br>(6.2–22.1)         | 16.0<br>(8.6–25.1)          | 24.8<br>(19.1–30.8)         | 6.5<br>(4.2–9.4)         | 17.1<br>(9.2–27.3)          | 15.6<br>(8.1–25.0)          | 13.5<br>(5.8–20.7)         | 13.5<br>(5.8–20.7)         | 10.5<br>(6.6–14.7)       | 16.1<br>(10.4–22.0)        | 1.4<br>(0.4–2.5)         | 0.2<br>(<0.1–0.4)            | 5.5<br>(1.6–12.3)         | 5.5<br>(1.6–12.3)         | 0.9<br>(<0.1–5.1)            | 0.9<br>(<0.1–5.1)            |
| <b>South Asia</b>    | <b>16.5<br/>(9.5–25.2)</b> | <b>20.9<br/>(13.3–30.0)</b> | <b>15.6<br/>(11.3–19.9)</b> | <b>1.6<br/>(0.9–2.5)</b> | <b>24.4<br/>(18.0–30.9)</b> | <b>23.2<br/>(17.1–29.6)</b> | <b>11.9<br/>(5.2–18.4)</b> | <b>12.3<br/>(5.3–18.9)</b> | <b>6.4<br/>(3.5–9.8)</b> | <b>11.5<br/>(6.4–16.7)</b> | <b>5.7<br/>(2.7–8.7)</b> | <b>0.3<br/>(&lt;0.1–0.6)</b> | <b>7.4<br/>(4.2–11.8)</b> | <b>7.4<br/>(4.1–11.3)</b> | <b>2.6<br/>(&lt;0.1–7.6)</b> | <b>2.4<br/>(&lt;0.1–7.3)</b> |
| Bangladesh           | 22.5<br>(13.0–34.3)        | 27.7<br>(17.5–39.2)         | 20.2<br>(13.4–26.6)         | 0.7<br>(0.3–1.3)         | 19.6<br>(13.7–25.9)         | 17.6<br>(11.7–23.6)         | 18.1<br>(8.1–27.1)         | 18.1<br>(8.1–27.1)         | 4.7<br>(2.3–7.6)         | 12.1<br>(6.2–18.8)         | 0.6<br>(0.0–1.6)         | 0.1<br>(0.0–0.4)             | 5.9<br>(2.7–9.8)          | 5.9<br>(2.7–9.8)          | 1.3<br>(<0.1–4.8)            | 1.3<br>(<0.1–4.8)            |
| Bhutan               | 17.1<br>(8.8–28.5)         | 21.3<br>(12.6–32.5)         | 8.6<br>(5.7–11.7)           | 2.8<br>(1.6–4.5)         | 14.9<br>(9.9–21.0)          | 13.4<br>(8.7–19.3)          | 6.1<br>(2.5–9.8)           | 6.1<br>(2.5–9.8)           | 6.3<br>(3.5–9.3)         | 7.3<br>(4.1–11.1)          | 1.7<br>(0.0–4.4)         | 0.1<br>(0.0–0.4)             | <0.1<br>(<0.1–0.1)        | <0.1<br>(<0.1–0.1)        | 18.6<br>(11.8–26.9)          | 18.6<br>(11.8–26.9)          |
| India                | 15.6<br>(8.9–23.9)         | 20.1<br>(12.8–28.6)         | 20.1<br>(11.3–20.0)         | 1.6<br>(0.9–2.5)         | 25.6<br>(19.1–32.1)         | 24.1<br>(17.8–30.4)         | 11.4<br>(4.9–17.5)         | 11.8<br>(5.1–18.2)         | 6.3<br>(3.4–9.7)         | 11.6<br>(6.6–16.8)         | 6.9<br>(3.3–10.7)        | 0.3<br>(<0.1–0.6)            | 7.3<br>(3.9–11.7)         | 7.5<br>(4.1–11.7)         | 2.1<br>(<0.1–6.8)            | 2.1<br>(<0.1–7.0)            |

|                                               | Household air pollution   |                            | Smoking                     |                          | Ambient particulate matter |                            | Handwashing              |                           | Secondhand smoke         |                            | Alcohol use                |                          | High temperature             |                              | Low temperature          |                          |
|-----------------------------------------------|---------------------------|----------------------------|-----------------------------|--------------------------|----------------------------|----------------------------|--------------------------|---------------------------|--------------------------|----------------------------|----------------------------|--------------------------|------------------------------|------------------------------|--------------------------|--------------------------|
|                                               | M                         | F                          | M                           | F                        | M                          | F                          | M                        | F                         | M                        | F                          | M                          | F                        | M                            | F                            | M                        | F                        |
| Nepal                                         | 23.7<br>(13.9–35.6)       | 28.5<br>(17.8–39.5)        | 11.7<br>(6.5–17.1)          | 5.5<br>(2.8–8.5)         | 22.2<br>(14.4–30.6)        | 19.6<br>(12.0–27.9)        | 11.3<br>(4.9–17.8)       | 11.3<br>(4.9–17.8)        | 5.8<br>(2.6–9.9)         | 7.6<br>(3.4–12.8)          | 3.6<br>(0.0–8.3)           | 1.1<br>(0.0–3.0)         | 1.4<br>(0.7–2.2)             | 1.4<br>(0.7–2.2)             | 13.0<br>(7.6–19.0)       | 13.0<br>(7.6–19.0)       |
| Pakistan                                      | 18.4<br>(10.6–28.1)       | 22.5<br>(13.7–32.3)        | 13.9<br>(10.2–18.0)         | 2.3<br>(1.3–3.5)         | 20.4<br>(14.1–27.5)        | 18.6<br>(12.6–25.6)        | 12.4<br>(5.2–19.2)       | 12.4<br>(5.3–19.2)        | 7.5<br>(4.0–11.2)        | 11.1<br>(6.1–16.2)         | 1.4<br>(0.3–2.4)           | 0.1<br>(<0.1–0.2)        | 9.2<br>(5.6–15.9)            | 9.2<br>(5.5–16.0)            | 4.9<br>(<0.1–12.8)       | 5.0<br>(<0.1–12.7)       |
| <b>Southeast Asia, East Asia, and Oceania</b> | <b>9.4<br/>(4.8–15.3)</b> | <b>13.5<br/>(7.7–20.4)</b> | <b>28.3<br/>(21.9–34.2)</b> | <b>3.1<br/>(1.9–4.5)</b> | <b>12.7<br/>(8.6–17.5)</b> | <b>11.6<br/>(7.9–15.9)</b> | <b>6.1<br/>(2.5–9.8)</b> | <b>6.4<br/>(2.6–10.2)</b> | <b>6.3<br/>(3.8–9.2)</b> | <b>16.2<br/>(9.8–22.6)</b> | <b>10.2<br/>(5.0–14.4)</b> | <b>1.4<br/>(0.3–2.4)</b> | <b>1.6<br/>(&lt;0.1–7.5)</b> | <b>1.6<br/>(&lt;0.1–8.9)</b> | <b>3.7<br/>(1.8–5.5)</b> | <b>3.3<br/>(1.6–5.0)</b> |
| East Asia                                     | 5.7<br>(2.6–10.3)         | 8.5<br>(4.3–14.4)          | 34.0<br>(27.9–39.7)         | 2.8<br>(1.8–3.9)         | 19.4<br>(13.4–26.1)        | 18.9<br>(13.2–25.1)        | 3.8<br>(1.5–6.2)         | 3.8<br>(1.6–6.2)          | 8.0<br>(5.1–11.3)        | 21.6<br>(14.2–28.8)        | 11.9<br>(6.0–17.0)         | 0.9<br>(0.2–1.8)         | 0.7<br>(<0.1–1.3)            | 0.6<br>(<0.1–1.2)            | 12.1<br>(7.3–16.5)       | 12.8<br>(7.7–17.5)       |
| China                                         | 5.2<br>(2.2–9.7)          | 7.3<br>(3.5–12.9)          | 34.2<br>(28.2–39.9)         | 2.5<br>(1.6–3.6)         | 20.0<br>(13.8–26.8)        | 19.5<br>(13.7–26.1)        | 4.0<br>(1.6–6.6)         | 4.0<br>(1.6–6.6)          | 8.1<br>(5.2–11.5)        | 21.9<br>(14.6–29.1)        | 12.2<br>(6.2–17.5)         | 1.0<br>(0.2–1.9)         | 0.7<br>(<0.1–1.3)            | 0.7<br>(<0.1–1.2)            | 12.1<br>(7.1–16.4)       | 12.6<br>(7.5–17.2)       |
| Democratic People's Republic of Korea         | 20.3<br>(10.8–32.1)       | 25.7<br>(15.8–37.6)        | 27.8<br>(21.4–34.4)         | 2.9<br>(1.5–4.8)         | 16.1<br>(10.3–22.3)        | 14.6<br>(9.2–20.5)         | 2.3<br>(0.9–3.7)         | 2.3<br>(0.9–3.7)          | 7.3<br>(4.4–10.4)        | 20.1<br>(13.0–27.2)        | 7.7<br>(3.0–12.8)          | 0.4<br>(0.0–1.1)         | 0.1<br>(<0.1–0.7)            | 0.1<br>(<0.1–0.7)            | 19.3<br>(11.7–29.7)      | 19.3<br>(11.7–29.7)      |
| Taiwan (Province of China)                    | 0.4<br>(0.1–1.2)          | 0.6<br>(0.1–1.8)           | 35.6<br>(29.0–42.4)         | 8.0<br>(5.0–11.7)        | 12.1<br>(7.5–17.9)         | 12.1<br>(7.5–17.9)         | 1.8<br>(0.7–3.0)         | 1.8<br>(0.7–3.0)          | 6.7<br>(4.1–9.9)         | 17.3<br>(11.0–23.6)        | 10.4<br>(4.6–15.9)         | 0.6<br>(0.0–1.4)         | 0.9<br>(0.2–2.3)             | 0.9<br>(0.2–2.3)             | 3.5<br>(<0.1–6.8)        | 3.5<br>(<0.1–6.8)        |
| Oceania                                       | 33.9<br>(21.3–46.6)       | 39.4<br>(27.0–50.6)        | 21.6<br>(14.3–28.7)         | 8.7<br>(5.0–12.6)        | 4.4<br>(1.4–10.7)          | 3.8<br>(1.2–9.4)           | 9.1<br>(4.0–14.4)        | 9.2<br>(4.0–14.8)         | 7.1<br>(3.4–11.4)        | 11.4<br>(5.8–17.6)         | 2.5<br>(0.0–6.1)           | 0.1<br>(0.0–0.7)         | 0.5<br>(<0.1–2.3)            | 0.5<br>(<0.1–2.3)            | 0.9<br>(<0.1–2.2)        | 0.9<br>(<0.1–2.2)        |
| Fiji                                          | 4.5<br>(1.3–9.6)          | 6.2<br>(2.1–12.5)          | 20.6<br>(13.2–27.7)         | 8.1<br>(4.2–12.4)        | 5.4<br>(1.4–13.3)          | 5.4<br>(1.5–13.1)          | 2.9<br>(1.2–4.8)         | 2.9<br>(1.2–4.8)          | 5.6<br>(2.5–9.4)         | 8.7<br>(4.0–14.2)          | 6.9<br>(2.9–11.1)          | 0.4<br>(0.0–1.0)         | 0.5<br>(<0.1–2.4)            | 0.5<br>(<0.1–2.4)            | <0.1<br>(<0.1–1.7)       | <0.1<br>(<0.1–1.7)       |
| Kiribati                                      | 25.0<br>(13.6–37.6)       | 30.4<br>(19.3–43.0)        | 26.1<br>(19.0–33.2)         | 14.2<br>(9.0–19.6)       | 3.7<br>(1.3–8.4)           | 3.2<br>(1.1–7.5)           | 6.5<br>(2.7–10.4)        | 6.5<br>(2.7–10.4)         | 9.3<br>(5.0–14.5)        | 13.9<br>(7.6–20.5)         | 2.3<br>(0.0–7.1)           | <0.1<br>(0.0–0.3)        | 0.9<br>(<0.1–5.0)            | 0.9<br>(<0.1–5.0)            | <0.1<br>(<0.1–0.1)       | <0.1<br>(<0.1–0.1)       |
| Marshall Islands                              | 7.9<br>(3.2–14.9)         | 10.7<br>(5.1–18.6)         | 22.3<br>(15.8–28.6)         | 5.4<br>(3.1–8.5)         | 4.3<br>(1.6–9.2)           | 4.2<br>(1.6–8.7)           | 4.5<br>(1.8–7.3)         | 4.5<br>(1.8–7.3)          | 6.8<br>(3.5–10.5)        | 12.2<br>(6.7–18.0)         | 4.6<br>(0.0–10.9)          | 0.2<br>(0.0–1.2)         | 0.2<br>(<0.1–11.3)           | 0.2<br>(<0.1–11.3)           | <0.1<br>(<0.1–0.1)       | <0.1<br>(<0.1–0.1)       |
| Micronesia (Federated States of)              | 7.0<br>(2.7–13.8)         | 9.4<br>(4.0–17.4)          | 23.1<br>(12.2–31.5)         | 12.5<br>(5.1–19.7)       | 5.1<br>(1.5–12.0)          | 4.9<br>(1.5–11.6)          | 3.9<br>(1.6–6.4)         | 3.9<br>(1.6–6.4)          | 6.0<br>(2.6–10.1)        | 9.6<br>(4.4–15.8)          | 6.7<br>(2.3–11.1)          | 0.1<br>(0.0–0.5)         | 0.2<br>(<0.1–11.3)           | 0.2<br>(<0.1–11.3)           | <0.1<br>(<0.1–0.2)       | <0.1<br>(<0.1–0.2)       |
| Nauru                                         | 0.6<br>(0.1–1.5)          | 0.8<br>(0.2–2.1)           | 20.0<br>(13.2–26.4)         | 17.0<br>(10.7–23.5)      | 1.9<br>(0.4–5.1)           | 2.0<br>(0.6–5.2)           | 3.1<br>(1.2–5.1)         | 3.1<br>(1.2–5.1)          | 6.4<br>(2.8–10.9)        | 10.1<br>(4.5–16.5)         | 10.3<br>(3.9–16.2)         | 0.6<br>(0.0–2.3)         | 2.4<br>(<0.1–31.1)           | 2.4<br>(<0.1–31.1)           | <0.1<br>(<0.1–0.3)       | <0.1<br>(<0.1–0.3)       |
| Palau                                         | <0.1<br>(<0.1–<0.1)       | <0.1<br>(<0.1–<0.1)        | 22.8<br>(15.9–29.8)         | 7.8<br>(4.4–11.8)        | 2.0<br>(<0.1–5.9)          | 2.0<br>(<0.1–5.9)          | 2.4<br>(0.9–3.9)         | 2.4<br>(0.9–3.9)          | 8.8<br>(4.7–13.1)        | 14.4<br>(8.1–20.7)         | 4.9<br>(0.0–12.4)          | 0.2<br>(0.0–1.2)         | 0.9<br>(<0.1–28.7)           | 0.9<br>(<0.1–28.7)           | <0.1<br>(<0.1–0.4)       | <0.1<br>(<0.1–0.4)       |
| Papua New Guinea                              | 38.8<br>(24.3–53.3)       | 44.3<br>(31.0–56.3)        | 20.0<br>(12.3–27.6)         | 8.6<br>(4.6–12.8)        | 4.6<br>(1.3–11.8)          | 3.8<br>(1.0–10.1)          | 12.2<br>(5.2–19.0)       | 12.2<br>(5.2–19.0)        | 7.2<br>(3.3–11.9)        | 11.2<br>(5.4–17.8)         | 1.9<br>(0.0–5.9)           | 0.1<br>(0.0–0.7)         | 0.4<br>(<0.1–1.9)            | 0.4<br>(<0.1–1.9)            | 1.6<br>(<0.1–3.7)        | 1.6<br>(<0.1–3.7)        |
| Samoa                                         | 15.6<br>(7.3–27.1)        | 20.0<br>(10.8–31.7)        | 23.9<br>(18.2–30.2)         | 9.9<br>(6.6–13.7)        | 5.1<br>(1.4–12.0)          | 4.7<br>(1.3–11.2)          | 2.2<br>(0.9–3.6)         | 2.2<br>(0.9–3.6)          | 11.0<br>(6.6–15.7)       | 17.1<br>(10.6–23.4)        | 5.6<br>(0.2–11.4)          | 0.3<br>(0.0–1.5)         | 0.4<br>(<0.1–2.2)            | 0.4<br>(<0.1–2.2)            | 0.1<br>(<0.1–1.4)        | 0.1<br>(<0.1–1.4)        |
| Solomon Islands                               | 38.8<br>(24.7–53.6)       | 44.9<br>(31.0–57.2)        | 25.5<br>(17.9–32.7)         | 9.2<br>(5.4–13.3)        | 3.9<br>(1.2–9.1)           | 3.2<br>(0.9–7.3)           | 4.9<br>(2.0–7.9)         | 4.9<br>(2.0–7.9)          | 7.2<br>(3.6–11.1)        | 12.2<br>(6.5–18.4)         | 1.7<br>(0.0–5.2)           | 0.1<br>(0.0–0.6)         | 0.5<br>(<0.1–3.3)            | 0.5<br>(<0.1–3.3)            | <0.1<br>(<0.1–0.5)       | <0.1<br>(<0.1–0.5)       |
| Tonga                                         | 7.1<br>(2.5–14.0)         | 9.6<br>(3.8–18.0)          | 22.7<br>(16.4–29.3)         | 8.4<br>(4.9–12.2)        | 5.2<br>(1.5–12.2)          | 5.1<br>(1.6–11.7)          | 3.3<br>(1.3–5.4)         | 3.3<br>(1.3–5.4)          | 8.2<br>(4.3–12.3)        | 13.9<br>(7.8–20.2)         | 2.4<br>(0.0–7.0)           | 0.1<br>(0.0–0.8)         | 1.2<br>(<0.1–3.0)            | 1.2<br>(<0.1–3.0)            | 0.2<br>(<0.1–2.6)        | 0.2<br>(<0.1–2.6)        |

|                                  | Household air pollution           |                                   | Smoking                          |                                | Ambient particulate matter       |                                 | Handwashing                      |                                  | Secondhand smoke               |                                | Alcohol use                     |                                | High temperature               |                                | Low temperature                    |                                    |
|----------------------------------|-----------------------------------|-----------------------------------|----------------------------------|--------------------------------|----------------------------------|---------------------------------|----------------------------------|----------------------------------|--------------------------------|--------------------------------|---------------------------------|--------------------------------|--------------------------------|--------------------------------|------------------------------------|------------------------------------|
|                                  | M                                 | F                                 | M                                | F                              | M                                | F                               | M                                | F                                | M                              | F                              | M                               | F                              | M                              | F                              | M                                  | F                                  |
| Tuvalu                           | 1.8<br>(0.4-4.3)                  | 2.5<br>(0.8-5.5)                  | 22.0<br>(15.1-29.1)              | 10.0<br>(5.7-14.9)             | 2.4<br>(0.8-5.6)                 | 2.5<br>(1.0-5.6)                | 3.7<br>(1.5-6.1)                 | 3.7<br>(1.5-6.1)                 | 7.6<br>(3.7-12.1)              | 12.0<br>(6.1-18.4)             | 3.4<br>(0.0-8.0)                | 0.1<br>(0.0-0.8)               | 1.4<br>(<0.1-12.8)             | 1.4<br>(<0.1-12.8)             | 0.1<br>(<0.1-0.7)                  | 0.1<br>(<0.1-0.7)                  |
| Vanuatu                          | 29.4<br>(16.9-43.6)               | 35.6<br>(22.9-48.9)               | 20.1<br>(12.8-27.2)              | 2.9<br>(1.4-4.7)               | 4.8<br>(1.4-10.7)                | 4.2<br>(1.2-9.3)                | 10.0<br>(4.3-15.7)               | 10.0<br>(4.3-15.7)               | 4.6<br>(1.9-7.9)               | 9.1<br>(4.0-15.2)              | 4.7<br>(1.2-8.4)                | 0.1<br>(0.0-0.4)               | 0.4<br>(<0.1-2.1)              | 0.4<br>(<0.1-2.1)              | <0.1<br>(<0.1-1.8)                 | <0.1<br>(<0.1-1.8)                 |
| Southeast Asia                   | 10.1<br>(5.1-16.9)                | 14.1<br>(7.8-21.5)                | 26.0<br>(19.2-32.2)              | 2.9<br>(1.7-4.4)               | 10.0<br>(6.6-14.4)               | 9.4<br>(6.3-13.2)               | 7.0<br>(2.9-11.1)                | 7.1<br>(2.9-11.4)                | 5.5<br>(3.1-8.4)               | 14.5<br>(8.4-20.6)             | 9.7<br>(4.6-13.9)               | 1.6<br>(0.3-2.8)               | 2.0<br>(<0.1-10.6)             | 2.0<br>(<0.1-11.8)             | 0.1<br>(<0.1-1.3)                  | 0.1<br>(<0.1-1.1)                  |
| Cambodia                         | 27.8<br>(16.4-41.1)               | 33.8<br>(21.7-46.8)               | 23.4<br>(17.7-29.4)              | 2.7<br>(1.5-4.3)               | 8.0<br>(4.5-12.6)                | 6.9<br>(3.9-11.0)               | 8.6<br>(3.5-13.5)                | 8.6<br>(3.5-13.5)                | 7.8<br>(4.7-11.3)              | 17.9<br>(11.3-24.4)            | 12.3<br>(5.6-18.6)              | 2.2<br>(0.0-5.1)               | 2.7<br>(<0.1-21.8)             | 2.7<br>(<0.1-21.8)             | <0.1<br>(<0.1-0.3)                 | <0.1<br>(<0.1-0.3)                 |
| Indonesia                        | 6.3<br>(2.5-12.2)                 | 9.2<br>(4.1-16.3)                 | 28.5<br>(21.0-35.4)              | 2.1<br>(1.2-3.2)               | 9.5<br>(6.0-14.3)                | 9.0<br>(5.8-13.2)               | 7.3<br>(3.0-11.6)                | 7.6<br>(3.1-12.1)                | 4.6<br>(2.5-7.1)               | 17.1<br>(10.1-24.4)            | 0.3<br>(0.0-1.7)                | <0.1<br>(0.0-0.1)              | 0.3<br>(<0.1-3.4)              | 0.4<br>(<0.1-3.6)              | <0.1<br>(<0.1-0.9)                 | <0.1<br>(<0.1-0.9)                 |
| Lao People's Democratic Republic | 30.0<br>(17.6-44.0)               | 36.2<br>(23.2-49.1)               | 21.5<br>(15.0-27.9)              | 2.6<br>(1.3-4.2)               | 7.3<br>(4.2-11.1)                | 6.4<br>(3.6-9.8)                | 10.2<br>(4.3-15.9)               | 10.2<br>(4.3-15.9)               | 6.3<br>(3.3-9.5)               | 14.4<br>(8.3-21.1)             | 10.4<br>(3.3-17.2)              | 4.3<br>(0.5-8.3)               | 1.8<br>(0.6-3.9)               | 1.8<br>(0.6-3.9)               | <0.1<br>(<0.1-2.9)                 | <0.1<br>(<0.1-2.9)                 |
| Malaysia                         | 0.1<br>(<0.1-0.2)                 | 0.1<br>(<0.1-0.3)                 | 30.4<br>(23.0-37.8)              | 2.1<br>(1.1-3.6)               | 8.3<br>(4.7-13.2)                | 8.3<br>(4.7-13.2)               | 2.0<br>(0.8-3.2)                 | 2.0<br>(0.8-3.2)                 | 5.7<br>(3.1-8.8)               | 15.3<br>(8.9-21.8)             | 2.8<br>(0.5-5.6)                | 0.2<br>(0.0-0.6)               | 0.8<br>(<0.1-3.9)              | 0.8<br>(<0.1-3.9)              | <0.1<br>(<0.1-0.8)                 | <0.1<br>(<0.1-0.8)                 |
| Maldives                         | 2.2<br>(0.7-5.1)                  | 3.2<br>(1.1-6.9)                  | 29.1<br>(22.2-35.8)              | 2.4<br>(1.2-4.0)               | 5.2<br>(2.9-8.7)                 | 5.2<br>(3.0-8.4)                | 8.1<br>(3.5-13.0)                | 8.1<br>(3.5-13.0)                | 7.9<br>(4.4-11.8)              | 16.2<br>(9.6-22.9)             | 1.2<br>(0.0-5.2)                | 0.1<br>(0.0-0.5)               | 0.4<br>(<0.1-11.4)             | 0.4<br>(<0.1-11.4)             | <0.1<br>(<0.1-0.1)                 | <0.1<br>(<0.1-0.1)                 |
| Mauritius                        | 0.1<br>(<0.1-0.4)                 | 0.2<br>(0.1-0.5)                  | 23.6<br>(16.0-30.5)              | 3.4<br>(1.8-5.3)               | 7.3<br>(3.0-13.8)                | 7.3<br>(3.1-13.7)               | 1.1<br>(0.4-1.8)                 | 1.1<br>(0.4-1.8)                 | 5.7<br>(3.0-8.7)               | 13.8<br>(7.9-20.1)             | 6.8<br>(1.1-12.7)               | 0.3<br>(0.0-1.6)               | 0.7<br>(<0.1-3.5)              | 0.7<br>(<0.1-3.5)              | <0.1<br>(<0.1-5.4)                 | <0.1<br>(<0.1-5.4)                 |
| Myanmar                          | 20.8<br>(11.0-32.7)               | 26.4<br>(15.7-38.8)               | 19.3<br>(12.1-26.2)              | 2.1<br>(1.0-3.6)               | 11.6<br>(7.8-15.9)               | 10.4<br>(7.1-14.3)              | 11.1<br>(4.7-17.5)               | 11.1<br>(4.7-17.5)               | 4.2<br>(1.8-6.9)               | 10.0<br>(4.7-16.0)             | 7.4<br>(2.1-12.7)               | 0.2<br>(0.0-0.7)               | 2.9<br>(1.3-5.3)               | 2.9<br>(1.3-5.3)               | 1.9<br>(<0.1-4.3)                  | 1.9<br>(<0.1-4.3)                  |
| Philippines                      | 12.1<br>(5.7-20.5)                | 15.9<br>(8.5-24.8)                | 26.3<br>(20.0-32.5)              | 4.6<br>(2.7-6.8)               | 9.2<br>(6.0-13.1)                | 8.6<br>(5.8-12.0)               | 6.2<br>(2.6-9.9)                 | 6.3<br>(2.6-10.0)                | 6.5<br>(3.7-9.9)               | 14.2<br>(8.3-20.4)             | 13.0<br>(6.1-18.7)              | 3.0<br>(0.6-5.4)               | 2.5<br>(<0.1-25.6)             | 2.4<br>(<0.1-24.7)             | 0.2<br>(<0.1-0.7)                  | 0.2<br>(<0.1-0.7)                  |
| Seychelles                       | 0.1<br>(<0.1-0.2)                 | 0.1<br>(<0.1-0.2)                 | 28.7<br>(21.6-36.1)              | 4.3<br>(2.4-7.0)               | 7.7<br>(3.3-14.3)                | 7.7<br>(3.3-14.3)               | 3.9<br>(1.6-6.3)                 | 3.9<br>(1.6-6.3)                 | 5.3<br>(2.9-8.1)               | 13.8<br>(8.1-19.8)             | 13.4<br>(5.9-20.5)              | 1.4<br>(0.0-3.3)               | 1.0<br>(<0.1-3.8)              | 1.0<br>(<0.1-3.8)              | 0.2<br>(<0.1-1.3)                  | 0.2<br>(<0.1-1.3)                  |
| Sri Lanka                        | 7.9<br>(2.9-15.9)                 | 10.9<br>(4.4-20.9)                | 15.6<br>(8.9-22.5)               | 1.4<br>(0.8-2.3)               | 9.9<br>(5.8-15.5)                | 9.6<br>(5.7-14.8)               | 5.0<br>(2.0-8.1)                 | 5.0<br>(2.0-8.1)                 | 3.8<br>(1.5-6.8)               | 7.9<br>(3.3-13.5)              | 12.8<br>(6.9-18.5)              | 0.8<br>(0.1-1.6)               | 1.2<br>(<0.1-13.3)             | 1.2<br>(<0.1-13.3)             | <0.1<br>(<0.1-0.8)                 | <0.1<br>(<0.1-0.8)                 |
| Thailand                         | 2.7<br>(0.9-5.8)                  | 3.9<br>(1.4-8.1)                  | 25.7<br>(18.3-32.7)              | 2.2<br>(1.2-3.3)               | 13.8<br>(8.8-20.0)               | 13.6<br>(8.8-19.6)              | 7.5<br>(3.1-12.1)                | 7.5<br>(3.1-12.1)                | 4.8<br>(2.6-7.4)               | 11.7<br>(6.6-17.1)             | 15.4<br>(8.6-21.3)              | 1.8<br>(0.2-3.5)               | 2.9<br>(<0.1-10.6)             | 2.9<br>(<0.1-10.6)             | <0.1<br>(<0.1-1.0)                 | <0.1<br>(<0.1-1.0)                 |
| Timor-Leste                      | 26.9<br>(15.2-40.2)               | 32.1<br>(19.9-45.2)               | 20.8<br>(9.6-28.6)               | 1.5<br>(0.6-2.6)               | 6.0<br>(2.9-10.9)                | 5.4<br>(2.5-9.8)                | 6.6<br>(2.7-10.6)                | 6.6<br>(2.7-10.6)                | 4.7<br>(2.2-8.0)               | 11.9<br>(5.9-18.5)             | 6.3<br>(1.4-11.6)               | 0.4<br>(0.0-1.2)               | 0.5<br>(<0.1-2.1)              | 0.5<br>(<0.1-2.1)              | <0.1<br>(<0.1-1.7)                 | <0.1<br>(<0.1-1.7)                 |
| Viet Nam                         | 7.9<br>(3.2-15.0)                 | 10.9<br>(5.0-19.3)                | 29.0<br>(22.3-35.8)              | 1.1<br>(0.6-1.9)               | 10.0<br>(6.4-14.6)               | 9.6<br>(6.3-13.8)               | 8.6<br>(3.6-13.6)                | 8.6<br>(3.6-13.6)                | 5.4<br>(3.0-8.0)               | 18.5<br>(11.4-25.6)            | 14.5<br>(6.6-21.9)              | 0.8<br>(0.0-2.1)               | 2.7<br>(0.9-5.9)               | 2.7<br>(0.9-5.9)               | 0.2<br>(<0.1-3.2)                  | 0.2<br>(<0.1-3.2)                  |
| <b>Sub-Saharan Africa</b>        | <b>30.6</b><br><b>(20.7-40.4)</b> | <b>36.7</b><br><b>(26.5-47.1)</b> | <b>11.8</b><br><b>(7.8-16.0)</b> | <b>1.8</b><br><b>(1.0-2.7)</b> | <b>11.2</b><br><b>(7.3-15.9)</b> | <b>9.5</b><br><b>(6.0-13.8)</b> | <b>21.3</b><br><b>(9.8-31.5)</b> | <b>21.5</b><br><b>(9.8-31.9)</b> | <b>3.9</b><br><b>(1.8-6.3)</b> | <b>5.8</b><br><b>(2.8-9.2)</b> | <b>7.3</b><br><b>(3.4-10.8)</b> | <b>2.0</b><br><b>(0.5-3.7)</b> | <b>2.9</b><br><b>(0.6-9.4)</b> | <b>3.1</b><br><b>(0.6-9.7)</b> | <b>1.8</b><br><b>(&lt;0.1-3.5)</b> | <b>1.6</b><br><b>(&lt;0.1-3.4)</b> |
| Central Sub-Saharan Africa       | 33.7<br>(21.9-45.6)               | 38.8<br>(26.9-49.7)               | 11.5<br>(7.2-15.9)               | 1.1<br>(0.6-1.7)               | 9.8<br>(5.1-16.8)                | 8.3<br>(4.0-14.2)               | 22.6<br>(10.4-33.2)              | 22.6<br>(10.4-33.2)              | 2.7<br>(1.2-4.8)               | 3.8<br>(1.6-6.5)               | 4.7<br>(0.8-8.6)                | 1.9<br>(0.0-4.3)               | 1.5<br>(0.3-3.4)               | 1.5<br>(0.4-3.4)               | <0.1<br>(<0.1-2.4)                 | <0.1<br>(<0.1-2.4)                 |

|                                  | Household air pollution |                     | Smoking             |                  | Ambient particulate matter |                     | Handwashing         |                     | Secondhand smoke |                   | Alcohol use        |                   | High temperature   |                    | Low temperature    |                    |
|----------------------------------|-------------------------|---------------------|---------------------|------------------|----------------------------|---------------------|---------------------|---------------------|------------------|-------------------|--------------------|-------------------|--------------------|--------------------|--------------------|--------------------|
|                                  | M                       | F                   | M                   | F                | M                          | F                   | M                   | F                   | M                | F                 | M                  | F                 | M                  | F                  | M                  | F                  |
| Angola                           | 15.3<br>(8.0–25.2)      | 19.4<br>(11.1–29.4) | 14.5<br>(10.4–19.2) | 1.7<br>(1.0–2.7) | 11.6<br>(6.1–19.0)         | 10.6<br>(5.6–17.2)  | 22.3<br>(10.2–32.8) | 22.3<br>(10.2–32.8) | 5.2<br>(2.9–8.0) | 9.2<br>(5.2–13.6) | 11.5<br>(5.7–16.5) | 5.4<br>(1.7–8.9)  | 1.7<br>(0.5–3.8)   | 1.7<br>(0.5–3.8)   | <0.1<br>(<0.1–2.9) | <0.1<br>(<0.1–2.9) |
| Central African Republic         | 47.3<br>(32.4–59.4)     | 51.1<br>(38.9–63.1) | 11.6<br>(7.4–16.2)  | 1.1<br>(0.6–1.9) | 7.7<br>(2.5–16.3)          | 5.9<br>(1.8–13.0)   | 21.6<br>(9.9–31.8)  | 21.6<br>(9.9–31.8)  | 3.5<br>(1.6–5.9) | 4.9<br>(2.3–8.0)  | 3.4<br>(0.0–8.0)   | 1.2<br>(0.0–3.8)  | 3.8<br>(1.5–7.0)   | 3.8<br>(1.5–7.0)   | <0.1<br>(<0.1–1.2) | <0.1<br>(<0.1–1.2) |
| Congo                            | 12.2<br>(5.7–21.7)      | 16.3<br>(8.8–26.2)  | 14.4<br>(9.4–20.0)  | 1.1<br>(0.5–1.8) | 16.4<br>(8.9–27.6)         | 15.3<br>(8.3–26.0)  | 21.0<br>(9.5–31.0)  | 21.0<br>(9.5–31.0)  | 3.9<br>(1.8–6.5) | 5.9<br>(2.8–9.4)  | 7.2<br>(1.2–13.3)  | 3.5<br>(0.0–8.0)  | 0.9<br>(<0.1–3.0)  | 0.9<br>(<0.1–3.0)  | <0.1<br>(<0.1–1.9) | <0.1<br>(<0.1–1.9) |
| Democratic Republic of the Congo | 39.2<br>(25.1–52.5)     | 44.7<br>(31.1–56.1) | 10.5<br>(6.0–15.2)  | 0.9<br>(0.5–1.5) | 9.0<br>(4.1–16.1)          | 7.3<br>(3.1–13.3)   | 23.0<br>(10.6–33.7) | 23.0<br>(10.6–33.7) | 1.9<br>(0.5–3.8) | 2.2<br>(0.6–4.6)  | 2.6<br>(0.0–6.8)   | 0.9<br>(0.0–3.2)  | 1.3<br>(0.1–3.1)   | 1.3<br>(0.1–3.1)   | 0.1<br>(<0.1–2.6)  | 0.1<br>(<0.1–2.6)  |
| Equatorial Guinea                | 3.5<br>(1.3–7.2)        | 4.7<br>(1.9–9.2)    | 11.8<br>(7.2–16.8)  | 1.1<br>(0.5–1.9) | 20.4<br>(10.1–33.6)        | 20.1<br>(10.1–33.1) | 19.9<br>(9.0–29.7)  | 19.9<br>(9.0–29.7)  | 4.1<br>(1.7–7.2) | 5.1<br>(2.1–8.7)  | 10.4<br>(4.6–16.5) | 5.0<br>(1.0–9.4)  | 0.4<br>(<0.1–1.3)  | 0.4<br>(<0.1–1.3)  | <0.1<br>(<0.1–2.4) | <0.1<br>(<0.1–2.4) |
| Gabon                            | 1.2<br>(0.4–2.6)        | 1.8<br>(0.6–3.4)    | 14.1<br>(8.8–19.6)  | 1.9<br>(0.9–3.2) | 17.8<br>(9.2–29.9)         | 17.7<br>(9.2–29.8)  | 16.9<br>(7.4–25.6)  | 16.9<br>(7.4–25.6)  | 4.1<br>(1.8–6.9) | 6.0<br>(2.8–9.9)  | 12.7<br>(6.2–19.0) | 6.3<br>(1.9–11.2) | 0.7<br>(<0.1–2.6)  | 0.7<br>(<0.1–2.6)  | <0.1<br>(<0.1–1.5) | <0.1<br>(<0.1–1.5) |
| Eastern Sub-Saharan Africa       | 40.0<br>(28.0–51.8)     | 44.9<br>(33.4–55.9) | 9.9<br>(6.1–14.0)   | 1.8<br>(0.9–2.9) | 6.8<br>(3.9–10.5)          | 5.6<br>(3.1–8.9)    | 22.4<br>(10.3–33.0) | 22.5<br>(10.4–33.0) | 3.3<br>(1.3–5.7) | 4.6<br>(1.9–8.0)  | 5.8<br>(2.4–9.1)   | 1.9<br>(0.4–3.3)  | 2.1<br>(0.3–5.6)   | 2.1<br>(0.3–5.6)   | 1.4<br>(<0.1–3.9)  | 1.3<br>(<0.1–3.8)  |
| Burundi                          | 48.9<br>(34.4–60.6)     | 52.2<br>(40.3–63.9) | 8.4<br>(4.9–12.4)   | 1.7<br>(0.7–3.1) | 5.7<br>(2.0–11.7)          | 4.4<br>(1.4–10.0)   | 22.9<br>(10.6–33.7) | 22.9<br>(10.6–33.7) | 2.7<br>(1.0–5.0) | 3.4<br>(1.2–6.2)  | 11.2<br>(5.1–17.3) | 2.1<br>(0.5–3.9)  | <0.1<br>(<0.1–0.3) | <0.1<br>(<0.1–0.3) | <0.1<br>(<0.1–6.1) | <0.1<br>(<0.1–6.1) |
| Comoros                          | 30.0<br>(17.6–43.7)     | 36.3<br>(24.1–49.3) | 14.2<br>(8.8–20.0)  | 1.1<br>(0.5–2.0) | 6.1<br>(3.4–9.7)           | 5.2<br>(2.8–8.4)    | 21.0<br>(9.6–31.1)  | 21.0<br>(9.6–31.1)  | 5.5<br>(2.6–9.0) | 8.3<br>(4.0–13.2) | 0.7<br>(0.0–2.2)   | 0.3<br>(0.0–1.0)  | 0.7<br>(<0.1–2.9)  | 0.7<br>(<0.1–2.9)  | 0.2<br>(<0.1–2.9)  | 0.2<br>(<0.1–2.9)  |
| Djibouti                         | 6.8<br>(2.9–13.4)       | 9.2<br>(4.2–16.8)   | 18.6<br>(11.9–25.7) | 2.3<br>(1.0–4.0) | 18.5<br>(9.0–32.0)         | 17.5<br>(8.5–30.8)  | 21.6<br>(9.9–32.0)  | 21.6<br>(9.9–32.0)  | 4.9<br>(2.2–8.3) | 9.5<br>(4.3–15.4) | 0.3<br>(0.0–1.7)   | 0.1<br>(0.0–0.5)  | 5.9<br>(<0.1–30.0) | 5.9<br>(<0.1–30.0) | 0.2<br>(<0.1–5.2)  | 0.2<br>(<0.1–5.2)  |
| Eritrea                          | 30.1<br>(17.2–43.4)     | 35.5<br>(22.7–47.2) | 12.8<br>(8.4–17.9)  | 0.5<br>(0.2–0.8) | 12.5<br>(6.1–21.1)         | 10.6<br>(4.9–17.9)  | 22.6<br>(10.4–33.1) | 22.6<br>(10.4–33.1) | 4.8<br>(2.6–7.5) | 5.3<br>(2.8–8.1)  | 1.6<br>(0.0–4.8)   | 0.4<br>(0.0–1.5)  | 4.5<br>(<0.1–22.1) | 4.5<br>(<0.1–22.1) | 0.1<br>(<0.1–2.5)  | 0.1<br>(<0.1–2.5)  |
| Ethiopia                         | 44.6<br>(30.9–55.8)     | 48.6<br>(36.7–59.8) | 4.7<br>(2.7–6.9)    | 0.4<br>(0.2–0.8) | 6.9<br>(3.3–11.7)          | 5.5<br>(2.6–9.9)    | 22.9<br>(10.6–33.6) | 23.0<br>(10.6–33.6) | 2.2<br>(0.7–4.1) | 2.2<br>(0.8–4.1)  | 4.3<br>(1.0–8.3)   | 1.3<br>(0.0–3.3)  | 3.4<br>(0.6–11.1)  | 3.9<br>(0.7–13.2)  | 4.5<br>(3.0–6.4)   | 4.2<br>(2.7–6.1)   |
| Kenya                            | 25.9<br>(16.2–36.9)     | 31.8<br>(21.1–42.7) | 10.9<br>(6.7–15.1)  | 1.5<br>(0.8–2.5) | 7.4<br>(4.4–11.4)          | 6.5<br>(3.8–10.2)   | 21.9<br>(10.1–32.4) | 22.0<br>(10.2–32.6) | 3.3<br>(1.4–5.6) | 4.7<br>(2.1–8.0)  | 6.8<br>(2.1–11.8)  | 1.2<br>(0.3–2.4)  | 2.6<br>(0.2–10.4)  | 2.6<br>(0.2–10.8)  | 3.4<br>(1.4–5.9)   | 3.3<br>(1.1–5.8)   |
| Madagascar                       | 40.9<br>(26.9–54.8)     | 46.5<br>(33.2–58.5) | 10.9<br>(5.9–15.9)  | 1.1<br>(0.5–1.8) | 5.0<br>(2.6–8.6)           | 4.1<br>(2.1–7.2)    | 22.4<br>(10.3–33.0) | 22.4<br>(10.3–33.0) | 2.8<br>(0.8–5.4) | 4.4<br>(1.4–8.6)  | 2.1<br>(0.0–5.8)   | 0.5<br>(0.0–1.7)  | 0.8<br>(<0.1–2.4)  | 0.8<br>(<0.1–2.4)  | 1.0<br>(<0.1–3.8)  | 1.0<br>(<0.1–3.8)  |
| Malawi                           | 43.6<br>(29.8–56.5)     | 48.3<br>(34.9–59.5) | 10.3<br>(5.9–15.3)  | 1.1<br>(0.4–1.9) | 5.4<br>(2.5–9.6)           | 4.4<br>(2.0–8.0)    | 22.6<br>(10.4–33.3) | 22.6<br>(10.4–33.3) | 3.5<br>(1.5–6.0) | 5.1<br>(2.1–8.8)  | 5.4<br>(1.9–9.4)   | 1.4<br>(0.0–3.4)  | 0.5<br>(<0.1–1.9)  | 0.5<br>(<0.1–1.9)  | 0.2<br>(<0.1–4.4)  | 0.2<br>(<0.1–4.4)  |
| Mozambique                       | 47.9<br>(33.4–59.5)     | 51.5<br>(39.4–62.3) | 10.6<br>(6.2–15.6)  | 2.5<br>(1.0–4.3) | 4.2<br>(1.8–7.7)           | 3.3<br>(1.4–6.3)    | 22.2<br>(10.2–32.7) | 22.2<br>(10.2–32.7) | 3.1<br>(1.0–5.8) | 4.2<br>(1.4–7.8)  | 1.7<br>(0.0–5.5)   | 0.5<br>(0.0–2.3)  | 2.4<br>(1.0–4.4)   | 2.4<br>(1.0–4.4)   | 0.2<br>(<0.1–3.3)  | 0.2<br>(<0.1–3.3)  |
| Rwanda                           | 35.8<br>(22.3–49.7)     | 41.8<br>(28.6–54.8) | 11.3<br>(7.2–15.7)  | 2.2<br>(1.2–3.5) | 10.1<br>(4.7–17.4)         | 8.5<br>(3.8–15.7)   | 23.2<br>(10.7–34.0) | 23.2<br>(10.7–34.0) | 4.8<br>(2.3–7.6) | 6.2<br>(3.2–9.7)  | 12.0<br>(5.1–18.8) | 4.6<br>(0.8–9.0)  | <0.1<br>(<0.1–0.1) | <0.1<br>(<0.1–0.1) | 2.0<br>(<0.1–7.5)  | 2.0<br>(<0.1–7.5)  |
| Somalia                          | 58.8<br>(45.2–80.6)     | 61.1<br>(46.5–84.7) | 11.3<br>(6.3–16.5)  | 1.0<br>(0.4–1.8) | 2.0<br>(0.4–6.3)           | 1.5<br>(0.3–4.4)    | 22.7<br>(10.5–33.4) | 22.7<br>(10.5–33.4) | 3.5<br>(1.5–6.2) | 4.9<br>(2.0–8.5)  | 0.0<br>(0.0–0.0)   | 0.0<br>(0.0–0.0)  | 2.3<br>(<0.1–15.8) | 2.3<br>(<0.1–15.8) | 0.1<br>(<0.1–1.3)  | 0.1<br>(<0.1–1.3)  |

|                             | Household air pollution |                     | Smoking             |                   | Ambient particulate matter |                     | Handwashing         |                     | Secondhand smoke  |                    | Alcohol use        |                   | High temperature    |                     | Low temperature     |                     |
|-----------------------------|-------------------------|---------------------|---------------------|-------------------|----------------------------|---------------------|---------------------|---------------------|-------------------|--------------------|--------------------|-------------------|---------------------|---------------------|---------------------|---------------------|
|                             | M                       | F                   | M                   | F                 | M                          | F                   | M                   | F                   | M                 | F                  | M                  | F                 | M                   | F                   | M                   | F                   |
| South Sudan                 | 41.0<br>(26.9–54.4)     | 46.1<br>(32.4–57.8) | 11.4<br>(6.5–16.6)  | 1.0<br>(0.4–1.8)  | 8.9<br>(4.2–15.3)          | 7.3<br>(3.2–13.1)   | 22.9<br>(10.6–33.6) | 22.9<br>(10.6–33.6) | 3.8<br>(1.6–6.6)  | 5.0<br>(2.2–8.5)   | 0.3<br>(0.0–1.4)   | 0.1<br>(0.0–0.4)  | 5.9<br>(<0.1–23.1)  | 5.9<br>(<0.1–23.1)  | <0.1<br>(<0.1–0.9)  | <0.1<br>(<0.1–0.9)  |
| Uganda                      | 38.5<br>(25.1–51.6)     | 43.8<br>(30.4–55.8) | 7.8<br>(4.4–11.6)   | 1.1<br>(0.5–2.0)  | 9.2<br>(4.8–14.8)          | 7.7<br>(3.9–12.6)   | 22.1<br>(10.1–32.5) | 22.1<br>(10.1–32.5) | 3.4<br>(1.4–6.0)  | 4.5<br>(1.9–7.7)   | 13.7<br>(7.1–19.6) | 6.3<br>(2.5–10.2) | 1.1<br>(0.2–2.9)    | 1.1<br>(0.2–2.9)    | <0.1<br>(<0.1–2.3)  | <0.1<br>(<0.1–2.3)  |
| United Republic of Tanzania | 37.7<br>(23.9–51.3)     | 43.6<br>(30.0–56.1) | 15.3<br>(9.5–21.5)  | 6.1<br>(2.9–10.0) | 7.2<br>(4.0–11.1)          | 6.0<br>(3.3–9.5)    | 22.5<br>(10.4–33.2) | 22.5<br>(10.4–33.2) | 4.7<br>(2.1–7.5)  | 7.5<br>(3.6–11.9)  | 9.6<br>(4.8–14.4)  | 3.3<br>(1.0–5.8)  | 0.9<br>(0.1–2.7)    | 0.9<br>(0.1–2.7)    | 0.1<br>(<0.1–3.5)   | 0.1<br>(<0.1–3.5)   |
| Zambia                      | 24.7<br>(14.0–37.9)     | 30.4<br>(18.9–43.2) | 10.9<br>(5.8–16.1)  | 1.8<br>(0.7–3.2)  | 9.7<br>(5.6–15.2)          | 8.6<br>(5.0–13.5)   | 21.3<br>(9.7–31.5)  | 21.3<br>(9.7–31.5)  | 3.2<br>(1.0–6.3)  | 5.3<br>(1.7–10.2)  | 8.9<br>(3.2–14.3)  | 2.6<br>(0.6–4.9)  | 1.2<br>(0.3–3.5)    | 1.2<br>(0.3–3.5)    | <0.1<br>(<0.1–5.0)  | <0.1<br>(<0.1–5.0)  |
| Southern Sub-Saharan Africa | 8.7<br>(4.3–14.3)       | 10.4<br>(5.9–16.2)  | 19.1<br>(13.2–25.2) | 4.2<br>(2.5–6.2)  | 12.9<br>(8.3–18.7)         | 12.8<br>(8.3–18.5)  | 16.5<br>(7.3–25.0)  | 16.3<br>(7.3–24.6)  | 4.6<br>(2.2–7.3)  | 8.8<br>(4.5–13.6)  | 12.6<br>(6.9–17.4) | 3.1<br>(1.2–5.1)  | 1.1<br>(0.5–2.3)    | 1.1<br>(0.5–2.4)    | 6.7<br>(4.1–9.3)    | 6.8<br>(4.2–9.5)    |
| Botswana                    | 6.8<br>(2.6–13.2)       | 9.4<br>(4.2–16.9)   | 21.9<br>(15.0–28.9) | 5.0<br>(2.9–7.4)  | 12.1<br>(7.2–18.8)         | 11.6<br>(7.0–17.8)  | 17.0<br>(7.5–25.6)  | 17.0<br>(7.5–25.6)  | 6.2<br>(3.0–9.8)  | 10.0<br>(5.0–15.4) | 12.1<br>(6.3–17.7) | 2.6<br>(0.8–4.7)  | 4.0<br>(1.5–7.7)    | 4.0<br>(1.5–7.7)    | 0.9<br>(<0.1–7.0)   | 0.9<br>(<0.1–7.0)   |
| Eswatini                    | 12.8<br>(5.8–22.5)      | 16.9<br>(8.8–27.6)  | 8.2<br>(4.6–12.2)   | 0.9<br>(0.5–1.5)  | 10.7<br>(6.3–16.3)         | 10.0<br>(6.0–15.0)  | 16.5<br>(7.4–25.0)  | 16.5<br>(7.4–25.0)  | 2.7<br>(1.1–4.9)  | 4.2<br>(1.7–7.6)   | 11.7<br>(6.5–16.6) | 2.0<br>(0.7–3.5)  | 0.4<br>(<0.1–1.2)   | 0.4<br>(<0.1–1.2)   | 3.3<br>(<0.1–8.1)   | 3.3<br>(<0.1–8.1)   |
| Lesotho                     | 18.2<br>(9.3–29.3)      | 23.4<br>(13.3–34.9) | 26.6<br>(20.3–33.1) | 0.8<br>(0.5–1.2)  | 11.2<br>(6.7–16.8)         | 10.0<br>(6.1–15.4)  | 23.1<br>(10.7–33.9) | 23.1<br>(10.7–33.9) | 5.8<br>(3.2–8.6)  | 13.8<br>(8.2–19.6) | 9.5<br>(3.1–15.0)  | 2.3<br>(0.0–5.0)  | <0.1<br>(<0.1–<0.1) | <0.1<br>(<0.1–<0.1) | 21.7<br>(15.2–28.4) | 21.7<br>(15.2–28.4) |
| Namibia                     | 9.6<br>(4.0–17.9)       | 12.9<br>(6.1–22.0)  | 11.4<br>(6.4–16.6)  | 3.3<br>(1.6–5.3)  | 11.5<br>(6.4–17.9)         | 10.9<br>(6.2–16.7)  | 14.3<br>(6.2–22.0)  | 14.3<br>(6.2–22.0)  | 3.8<br>(1.5–7.0)  | 5.7<br>(2.2–10.0)  | 12.8<br>(5.6–19.2) | 6.1<br>(1.5–10.9) | 3.2<br>(1.3–6.0)    | 3.2<br>(1.3–6.0)    | 1.3<br>(<0.1–6.0)   | 1.3<br>(<0.1–6.0)   |
| South Africa                | 2.4<br>(0.9–4.5)        | 3.3<br>(1.4–6.0)    | 18.8<br>(12.0–25.6) | 5.4<br>(3.2–8.2)  | 15.0<br>(9.5–21.7)         | 15.0<br>(9.7–21.5)  | 14.5<br>(6.4–22.3)  | 14.4<br>(6.4–22.3)  | 4.5<br>(2.0–7.4)  | 8.1<br>(4.0–13.0)  | 14.2<br>(8.0–19.4) | 3.7<br>(1.6–6.0)  | 0.7<br>(0.3–2.0)    | 0.8<br>(0.3–2.0)    | 8.4<br>(6.3–10.8)   | 8.3<br>(6.2–10.7)   |
| Zimbabwe                    | 25.1<br>(14.0–37.9)     | 31.0<br>(19.5–43.8) | 19.7<br>(14.0–25.7) | 1.2<br>(0.7–2.0)  | 7.9<br>(4.6–12.4)          | 6.9<br>(3.9–10.6)   | 20.9<br>(9.6–31.0)  | 20.9<br>(9.6–31.0)  | 4.6<br>(2.4–7.1)  | 10.6<br>(5.9–15.8) | 8.6<br>(3.2–14.3)  | 1.0<br>(0.0–2.5)  | 1.7<br>(0.7–3.8)    | 1.7<br>(0.7–3.8)    | 0.7<br>(<0.1–5.1)   | 0.7<br>(<0.1–5.1)   |
| Western Sub-Saharan Africa  | 30.0<br>(20.2–40.6)     | 36.7<br>(26.2–47.4) | 10.3<br>(7.0–14.0)  | 1.2<br>(0.7–1.9)  | 15.6<br>(10.0–22.7)        | 12.9<br>(8.1–19.2)  | 21.8<br>(10.0–32.1) | 21.8<br>(10.0–32.1) | 4.6<br>(2.4–7.0)  | 6.7<br>(3.5–10.1)  | 7.5<br>(3.8–10.7)  | 1.9<br>(0.4–3.6)  | 5.3<br>(0.4–19.2)   | 5.7<br>(0.6–21.2)   | 0.5<br>(<0.1–2.4)   | 0.6<br>(<0.1–2.8)   |
| Benin                       | 38.5<br>(25.0–52.3)     | 43.6<br>(30.6–55.0) | 8.9<br>(5.7–12.7)   | 1.2<br>(0.6–2.0)  | 11.0<br>(5.4–18.3)         | 9.0<br>(4.2–15.4)   | 22.1<br>(10.1–32.6) | 22.1<br>(10.1–32.6) | 4.7<br>(2.4–7.2)  | 6.6<br>(3.5–10.2)  | 4.5<br>(1.3–8.1)   | 1.6<br>(0.0–3.9)  | 3.3<br>(<0.1–18.5)  | 3.3<br>(<0.1–18.5)  | <0.1<br>(<0.1–1.2)  | <0.1<br>(<0.1–1.2)  |
| Burkina Faso                | 46.9<br>(31.7–59.5)     | 50.5<br>(38.1–63.9) | 13.1<br>(7.9–18.7)  | 1.2<br>(0.6–2.1)  | 8.1<br>(2.8–16.2)          | 6.2<br>(2.1–13.4)   | 22.2<br>(10.2–32.7) | 22.2<br>(10.2–32.7) | 3.5<br>(1.5–6.1)  | 6.1<br>(2.7–10.4)  | 8.7<br>(3.2–14.6)  | 5.3<br>(0.4–10.6) | 4.6<br>(<0.1–34.1)  | 4.6<br>(<0.1–34.1)  | <0.1<br>(<0.1–3.1)  | <0.1<br>(<0.1–3.1)  |
| Cabo Verde                  | 5.8<br>(2.6–10.6)       | 7.8<br>(4.0–13.5)   | 8.7<br>(5.5–12.4)   | 1.9<br>(0.9–3.1)  | 21.9<br>(13.5–31.7)        | 21.0<br>(13.2–30.6) | 19.0<br>(8.5–28.3)  | 19.0<br>(8.5–28.3)  | 4.5<br>(2.0–7.1)  | 6.4<br>(3.1–10.2)  | 9.1<br>(4.8–13.2)  | 3.8<br>(1.1–6.8)  | 0.2<br>(<0.1–1.1)   | 0.2<br>(<0.1–1.1)   | <0.1<br>(<0.1–6.3)  | <0.1<br>(<0.1–6.3)  |
| Cameroon                    | 20.1<br>(11.2–31.6)     | 25.3<br>(15.3–36.8) | 11.2<br>(7.4–15.4)  | 0.9<br>(0.4–1.6)  | 20.6<br>(13.1–29.3)        | 18.5<br>(11.6–26.3) | 21.8<br>(10.0–32.1) | 21.8<br>(10.0–32.1) | 3.7<br>(1.7–6.0)  | 6.5<br>(3.1–10.2)  | 9.9<br>(5.1–14.3)  | 4.2<br>(1.3–7.2)  | 2.0<br>(0.1–7.1)    | 2.0<br>(0.1–7.1)    | <0.1<br>(<0.1–1.6)  | <0.1<br>(<0.1–1.6)  |
| Chad                        | 48.0<br>(33.3–61.1)     | 51.2<br>(39.2–65.3) | 11.6<br>(7.2–16.6)  | 1.8<br>(0.9–2.9)  | 8.0<br>(2.9–17.2)          | 6.2<br>(2.2–13.9)   | 22.3<br>(10.2–32.8) | 22.3<br>(10.2–32.8) | 4.1<br>(1.8–6.7)  | 7.0<br>(3.3–11.6)  | 5.2<br>(0.6–9.8)   | 2.8<br>(0.0–6.6)  | 7.0<br>(0.4–22.9)   | 7.0<br>(0.4–22.9)   | 1.3<br>(<0.1–7.7)   | 1.3<br>(<0.1–7.7)   |
| Côte d'Ivoire               | 30.1<br>(17.7–43.8)     | 36.0<br>(24.1–48.2) | 18.5<br>(13.3–24.0) | 2.0<br>(1.1–3.3)  | 15.2<br>(8.2–24.9)         | 13.0<br>(6.6–22.0)  | 20.8<br>(9.5–31.0)  | 20.8<br>(9.5–31.0)  | 6.7<br>(3.7–10.3) | 10.4<br>(5.8–15.2) | 10.3<br>(3.9–16.1) | 1.9<br>(0.0–4.8)  | 1.6<br>(<0.1–5.7)   | 1.6<br>(<0.1–5.7)   | 0.2<br>(<0.1–1.2)   | 0.2<br>(<0.1–1.2)   |

|                       | Household air pollution |                     | Smoking             |                  | Ambient particulate matter |                     | Handwashing         |                     | Secondhand smoke  |                    | Alcohol use        |                   | High temperature   |                    | Low temperature    |                    |
|-----------------------|-------------------------|---------------------|---------------------|------------------|----------------------------|---------------------|---------------------|---------------------|-------------------|--------------------|--------------------|-------------------|--------------------|--------------------|--------------------|--------------------|
|                       | M                       | F                   | M                   | F                | M                          | F                   | M                   | F                   | M                 | F                  | M                  | F                 | M                  | F                  | M                  | F                  |
| Gambia                | 35.9<br>(22.6–49.4)     | 41.4<br>(28.2–52.8) | 16.1<br>(11.0–22.2) | 0.6<br>(0.3–1.0) | 13.8<br>(7.2–22.3)         | 11.5<br>(5.8–19.5)  | 21.9<br>(10.1–32.3) | 21.9<br>(10.1–32.3) | 6.8<br>(3.6–10.4) | 9.9<br>(5.3–14.8)  | 5.0<br>(1.7–8.4)   | 1.5<br>(0.0–3.6)  | 2.2<br>(<0.1–20.9) | 2.2<br>(<0.1–20.9) | 0.1<br>(<0.1–1.5)  | 0.1<br>(<0.1–1.5)  |
| Ghana                 | 14.8<br>(7.6–24.8)      | 19.3<br>(11.0–30.3) | 6.1<br>(3.5–9.1)    | 1.7<br>(0.9–2.9) | 20.1<br>(12.8–29.9)        | 18.6<br>(11.7–27.8) | 22.3<br>(10.3–32.8) | 22.3<br>(10.3–32.8) | 3.4<br>(1.6–5.6)  | 4.5<br>(2.1–7.1)   | 7.7<br>(2.3–12.7)  | 1.8<br>(0.0–4.2)  | 2.9<br>(<0.1–18.5) | 2.9<br>(<0.1–18.5) | <0.1<br>(<0.1–0.7) | <0.1<br>(<0.1–0.7) |
| Guinea                | 44.3<br>(29.5–56.5)     | 48.3<br>(35.1–59.4) | 17.6<br>(11.9–24.1) | 1.2<br>(0.6–1.9) | 9.6<br>(4.1–17.2)          | 7.5<br>(3.2–14.5)   | 22.3<br>(10.3–32.8) | 22.3<br>(10.3–32.8) | 5.1<br>(2.6–7.9)  | 7.9<br>(4.2–12.0)  | 2.2<br>(0.4–4.2)   | 0.2<br>(0.0–0.9)  | 2.7<br>(0.7–7.1)   | 2.7<br>(0.7–7.1)   | 0.1<br>(<0.1–1.3)  | 0.1<br>(<0.1–1.3)  |
| Guinea-Bissau         | 41.7<br>(27.4–54.6)     | 46.5<br>(33.2–57.7) | 7.4<br>(4.8–10.5)   | 0.8<br>(0.4–1.3) | 10.9<br>(4.8–19.0)         | 8.7<br>(3.8–15.7)   | 22.3<br>(10.3–32.8) | 22.3<br>(10.3–32.8) | 5.0<br>(2.6–8.0)  | 7.6<br>(4.0–11.6)  | 6.7<br>(2.5–10.8)  | 2.0<br>(0.0–4.3)  | 2.2<br>(<0.1–22.7) | 2.2<br>(<0.1–22.7) | <0.1<br>(<0.1–1.3) | <0.1<br>(<0.1–1.3) |
| Liberia               | 39.1<br>(24.3–51.9)     | 44.3<br>(31.6–55.6) | 9.4<br>(5.4–13.7)   | 1.4<br>(0.7–2.3) | 11.5<br>(5.6–19.8)         | 9.3<br>(4.5–16.2)   | 23.3<br>(10.8–34.1) | 23.3<br>(10.8–34.1) | 3.3<br>(1.4–5.8)  | 4.7<br>(2.0–8.0)   | 8.4<br>(3.2–13.5)  | 4.1<br>(1.5–7.1)  | 0.9<br>(<0.1–3.3)  | 0.9<br>(<0.1–3.3)  | 0.1<br>(<0.1–2.0)  | 0.1<br>(<0.1–2.0)  |
| Mali                  | 47.4<br>(32.7–60.0)     | 50.8<br>(37.3–64.4) | 12.4<br>(7.5–17.5)  | 0.6<br>(0.2–1.1) | 8.6<br>(3.0–17.2)          | 6.7<br>(2.4–14.5)   | 21.9<br>(10.1–32.3) | 21.9<br>(10.1–32.3) | 3.9<br>(1.7–6.5)  | 6.2<br>(2.9–10.3)  | 1.1<br>(0.4–1.9)   | 1.2<br>(0.2–2.4)  | 7.3<br>(<0.1–26.7) | 7.3<br>(<0.1–26.7) | 1.3<br>(<0.1–13.3) | 1.3<br>(<0.1–13.3) |
| Mauritania            | 15.6<br>(7.5–25.5)      | 19.9<br>(10.8–30.4) | 18.7<br>(12.7–24.8) | 4.8<br>(2.5–7.5) | 22.4<br>(13.1–34.1)        | 20.5<br>(11.7–31.4) | 19.6<br>(8.8–29.2)  | 19.6<br>(8.8–29.2)  | 4.1<br>(1.8–6.9)  | 6.4<br>(2.9–10.8)  | <0.1<br>(0.0–<0.1) | 0.0<br>(0.0–0.0)  | 8.0<br>(1.7–19.5)  | 8.0<br>(1.7–19.5)  | 1.9<br>(<0.1–13.0) | 1.9<br>(<0.1–13.0) |
| Niger                 | 51.6<br>(36.5–70.0)     | 54.7<br>(40.3–74.8) | 9.8<br>(6.2–13.9)   | 0.8<br>(0.4–1.4) | 7.2<br>(1.9–18.4)          | 5.6<br>(1.5–15.0)   | 21.4<br>(9.8–31.7)  | 21.4<br>(9.8–31.7)  | 4.4<br>(2.1–7.0)  | 6.7<br>(3.4–10.3)  | 0.3<br>(0.0–1.4)   | 0.1<br>(0.0–0.5)  | 8.4<br>(0.5–23.3)  | 8.4<br>(0.5–23.3)  | 1.6<br>(<0.1–11.5) | 1.6<br>(<0.1–11.5) |
| Nigeria               | 25.7<br>(16.5–35.8)     | 30.6<br>(21.3–41.0) | 7.3<br>(5.0–10.0)   | 0.8<br>(0.4–1.2) | 18.4<br>(11.4–27.2)        | 16.1<br>(9.7–24.0)  | 21.9<br>(10.0–32.1) | 21.9<br>(10.1–32.3) | 4.6<br>(2.5–6.9)  | 5.8<br>(3.2–8.6)   | 9.6<br>(5.1–13.7)  | 1.3<br>(0.1–2.6)  | 8.8<br>(1.3–38.7)  | 9.1<br>(1.4–39.9)  | 1.0<br>(<0.1–2.8)  | 1.0<br>(<0.1–2.9)  |
| Sao Tome and Principe | 18.1<br>(9.3–29.0)      | 22.9<br>(13.1–34.0) | 6.9<br>(4.4–9.8)    | 0.8<br>(0.4–1.4) | 12.3<br>(6.7–19.5)         | 11.2<br>(6.0–17.8)  | 17.4<br>(7.7–26.1)  | 17.4<br>(7.7–26.1)  | 3.1<br>(1.5–5.2)  | 3.8<br>(1.9–6.0)   | 9.8<br>(5.0–14.5)  | 4.2<br>(1.1–7.5)  | 0.9<br>(<0.1–3.7)  | 0.9<br>(<0.1–3.7)  | <0.1<br>(<0.1–1.9) | <0.1<br>(<0.1–1.9) |
| Senegal               | 33.0<br>(20.2–45.7)     | 38.1<br>(25.5–49.4) | 14.3<br>(9.7–18.9)  | 0.9<br>(0.4–1.5) | 14.7<br>(7.8–23.6)         | 12.3<br>(6.1–20.6)  | 18.8<br>(8.4–28.1)  | 18.8<br>(8.4–28.1)  | 8.2<br>(4.7–11.9) | 11.0<br>(6.4–15.9) | 1.4<br>(0.5–2.4)   | 0.4<br>(<0.1–0.9) | 4.2<br>(<0.1–30.1) | 4.2<br>(<0.1–30.1) | 0.1<br>(<0.1–2.2)  | 0.1<br>(<0.1–2.2)  |
| Sierra Leone          | 42.5<br>(27.4–54.9)     | 47.0<br>(33.7–58.2) | 15.4<br>(9.5–21.8)  | 3.9<br>(1.8–6.6) | 10.2<br>(4.4–18.2)         | 8.1<br>(3.6–15.0)   | 22.2<br>(10.2–32.6) | 22.2<br>(10.2–32.6) | 4.2<br>(1.6–7.7)  | 6.7<br>(2.7–12.0)  | 7.4<br>(3.0–11.6)  | 2.4<br>(0.2–5.0)  | 1.8<br>(<0.1–4.3)  | 1.8<br>(<0.1–4.3)  | 0.2<br>(<0.1–1.5)  | 0.2<br>(<0.1–1.5)  |
| Togo                  | 33.0<br>(20.5–47.0)     | 39.2<br>(26.9–51.3) | 13.0<br>(9.1–17.3)  | 1.6<br>(0.9–2.4) | 12.8<br>(6.9–20.2)         | 10.7<br>(5.7–17.2)  | 22.0<br>(10.1–32.5) | 22.0<br>(10.1–32.5) | 6.4<br>(3.8–9.3)  | 9.8<br>(5.9–14.0)  | 5.0<br>(1.7–8.6)   | 1.5<br>(0.0–3.4)  | 2.7<br>(<0.1–13.0) | 2.7<br>(<0.1–13.0) | 0.1<br>(<0.1–0.9)  | 0.1<br>(<0.1–0.9)  |



Appendix Table 10. Population-attributable fractions of lower respiratory infections due to evaluated risk factors among people aged 50 to 69 years in 2019, males (M) and females (F) (95% UI)

|                                                         | Smoking                    |                            | Household air pollution   |                            | Ambient particulate matter |                            | Handwashing               |                           | Secondhand smoke         |                           | Alcohol use               |                         | High temperature         |                          | Low temperature           |                           |
|---------------------------------------------------------|----------------------------|----------------------------|---------------------------|----------------------------|----------------------------|----------------------------|---------------------------|---------------------------|--------------------------|---------------------------|---------------------------|-------------------------|--------------------------|--------------------------|---------------------------|---------------------------|
|                                                         | M                          | F                          | M                         | F                          | M                          | F                          | M                         | F                         | M                        | F                         | M                         | F                       | M                        | F                        | M                         | F                         |
| <b>Global</b>                                           | <b>30.5</b><br>(24.1–36.9) | <b>7.9</b><br>(5.5–10.5)   | <b>13.1</b><br>(8.0–19.0) | <b>18.2</b><br>(12.5–24.5) | <b>13.9</b><br>(9.8–18.4)  | <b>14.4</b><br>(10.4–18.9) | <b>10.3</b><br>(4.6–15.8) | <b>11.3</b><br>(5.0–17.2) | <b>6.0</b><br>(3.5–8.7)  | <b>8.8</b><br>(5.1–12.8)  | <b>8.9</b><br>(4.5–12.5)  | <b>1.8</b><br>(0.5–3.1) | <b>3.0</b><br>(1.3–6.4)  | <b>3.8</b><br>(1.7–7.7)  | <b>5.9</b><br>(3.4–8.4)   | <b>4.7</b><br>(2.2–7.3)   |
| <b>Central Europe, Eastern Europe, and Central Asia</b> | <b>45.7</b><br>(37.9–52.9) | <b>16.8</b><br>(12.1–21.6) | <b>0.6</b><br>(0.2–1.4)   | <b>1.3</b><br>(0.5–2.7)    | <b>7.7</b><br>(4.5–12.1)   | <b>8.6</b><br>(5.0–12.9)   | <b>2.3</b><br>(0.9–3.8)   | <b>2.4</b><br>(1.0–3.9)   | <b>7.0</b><br>(4.2–10.0) | <b>12.6</b><br>(7.9–17.4) | <b>16.2</b><br>(9.0–22.4) | <b>3.9</b><br>(0.9–6.9) | <b>0.1</b><br>(<0.1–0.4) | <b>0.1</b><br>(<0.1–0.5) | <b>18.1</b><br>(7.7–28.6) | <b>18.3</b><br>(9.3–28.4) |
| Central Asia                                            | 40.4<br>(32.7–47.7)        | 5.0<br>(3.1–7.2)           | 2.1<br>(0.8–4.2)          | 3.5<br>(1.6–6.6)           | 13.5<br>(7.5–21.1)         | 14.1<br>(7.8–22.4)         | 4.2<br>(1.7–6.9)          | 4.5<br>(1.8–7.2)          | 7.3<br>(4.4–10.4)        | 12.1<br>(7.5–16.7)        | 8.5<br>(3.7–13.0)         | 1.1<br>(0.0–2.6)        | 0.6<br>(<0.1–1.8)        | 0.7<br>(<0.1–1.8)        | 18.2<br>(12.8–25.0)       | 18.3<br>(13.0–24.7)       |
| Armenia                                                 | 49.9<br>(41.7–57.6)        | 5.5<br>(3.2–8.3)           | 0.3<br>(0.1–0.8)          | 0.5<br>(0.2–1.3)           | 16.8<br>(9.1–26.9)         | 16.8<br>(9.2–26.9)         | 3.8<br>(1.5–6.2)          | 3.8<br>(1.5–6.2)          | 8.8<br>(5.4–12.6)        | 17.8<br>(11.7–24.2)       | 4.9<br>(0.7–9.0)          | 2.7<br>(0.6–5.0)        | <0.1<br>(<0.1–0.2)       | <0.1<br>(<0.1–0.2)       | 18.4<br>(8.4–31.6)        | 18.4<br>(8.4–31.6)        |
| Azerbaijan                                              | 48.9<br>(41.4–56.3)        | 2.6<br>(1.4–4.2)           | 0.9<br>(0.3–2.0)          | 1.3<br>(0.4–2.9)           | 12.9<br>(6.1–22.6)         | 12.9<br>(6.2–22.4)         | 3.5<br>(1.4–5.7)          | 3.5<br>(1.4–5.7)          | 9.8<br>(6.4–13.8)        | 18.9<br>(12.7–25.2)       | 12.0<br>(5.4–18.1)        | 2.7<br>(0.3–5.6)        | 0.5<br>(<0.1–1.1)        | 0.5<br>(<0.1–1.1)        | 15.7<br>(12.6–19.1)       | 15.7<br>(12.6–19.1)       |
| Georgia                                                 | 47.0<br>(39.1–54.5)        | 8.6<br>(5.7–12.2)          | 3.9<br>(1.2–8.5)          | 5.8<br>(2.1–12.1)          | 9.1<br>(5.3–14.5)          | 9.0<br>(5.3–13.7)          | 3.3<br>(1.3–5.4)          | 3.3<br>(1.3–5.4)          | 10.5<br>(6.5–15.0)       | 17.7<br>(11.8–23.9)       | 12.7<br>(6.2–18.3)        | 0.4<br>(0.0–1.7)        | <0.1<br>(<0.1–0.2)       | <0.1<br>(<0.1–0.2)       | 18.9<br>(11.2–29.0)       | 18.9<br>(11.2–29.0)       |
| Kazakhstan                                              | 43.6<br>(35.2–51.6)        | 7.3<br>(4.2–11.0)          | 1.2<br>(0.3–2.8)          | 1.8<br>(0.6–4.2)           | 10.3<br>(5.4–16.8)         | 10.3<br>(5.4–16.6)         | 3.4<br>(1.4–5.7)          | 3.4<br>(1.4–5.7)          | 6.4<br>(3.7–9.4)         | 12.7<br>(7.5–18.0)        | 9.7<br>(4.0–15.3)         | 2.2<br>(0.0–5.1)        | 0.5<br>(<0.1–2.0)        | 0.5<br>(<0.1–2.0)        | 18.4<br>(11.3–27.6)       | 18.4<br>(11.3–27.6)       |
| Kyrgyzstan                                              | 48.2<br>(40.2–55.8)        | 7.1<br>(4.8–10.0)          | 5.4<br>(2.2–10.4)         | 7.9<br>(3.6–14.5)          | 11.8<br>(6.3–19.4)         | 11.3<br>(6.2–18.4)         | 4.0<br>(1.6–6.5)          | 4.0<br>(1.6–6.5)          | 8.7<br>(5.6–12.3)        | 17.6<br>(11.7–23.7)       | 10.4<br>(5.1–15.2)        | 1.4<br>(0.1–2.8)        | <0.1<br>(<0.1–<0.1)      | <0.1<br>(<0.1–<0.1)      | 21.4<br>(8.4–37.4)        | 21.4<br>(8.4–37.4)        |
| Mongolia                                                | 41.3<br>(32.7–49.4)        | 7.1<br>(4.2–10.4)          | 6.5<br>(2.6–12.6)         | 9.5<br>(4.3–16.9)          | 17.3<br>(10.9–24.5)        | 16.6<br>(10.7–23.5)        | 8.5<br>(3.6–13.6)         | 8.5<br>(3.6–13.6)         | 5.9<br>(3.3–8.8)         | 12.6<br>(7.2–18.3)        | 12.2<br>(6.1–18.2)        | 1.2<br>(0.0–3.3)        | 0.2<br>(<0.1–0.9)        | 0.2<br>(<0.1–0.9)        | 18.3<br>(3.6–34.9)        | 18.3<br>(3.6–34.9)        |
| Tajikistan                                              | 34.1<br>(27.0–42.4)        | 4.0<br>(2.4–6.2)           | 7.5<br>(3.2–14.0)         | 10.7<br>(5.3–18.2)         | 16.9<br>(8.1–28.7)         | 15.9<br>(7.7–27.1)         | 7.1<br>(2.9–11.3)         | 7.1<br>(2.9–11.3)         | 8.4<br>(5.3–12.0)        | 10.3<br>(6.6–14.4)        | 4.9<br>(1.3–8.8)          | 0.3<br>(0.0–1.1)        | 0.3<br>(0.1–0.5)         | 0.3<br>(0.1–0.5)         | 21.4<br>(9.3–34.9)        | 21.4<br>(9.3–34.9)        |
| Turkmenistan                                            | 38.0<br>(30.5–45.7)        | 7.7<br>(4.6–11.5)          | <0.1<br>(<0.1–<0.1)       | <0.1<br>(<0.1–0.1)         | 13.3<br>(6.3–23.0)         | 13.3<br>(6.3–23.0)         | 4.6<br>(1.9–7.4)          | 4.6<br>(1.9–7.4)          | 12.7<br>(8.4–17.7)       | 18.9<br>(12.7–25.6)       | 10.2<br>(4.3–15.4)        | 0.8<br>(0.0–2.6)        | 2.6<br>(0.9–4.3)         | 2.6<br>(0.9–4.3)         | 12.7<br>(10.0–15.4)       | 12.7<br>(10.0–15.4)       |
| Uzbekistan                                              | 33.7<br>(26.1–41.0)        | 3.5<br>(2.0–5.5)           | 1.6<br>(0.6–3.5)          | 2.4<br>(0.9–5.0)           | 16.9<br>(8.4–28.0)         | 16.7<br>(8.4–27.5)         | 4.5<br>(1.8–7.3)          | 4.5<br>(1.8–7.3)          | 6.2<br>(3.4–9.3)         | 9.2<br>(5.4–13.2)         | 6.2<br>(2.0–10.4)         | 0.4<br>(0.0–1.4)        | 1.0<br>(<0.1–2.7)        | 1.0<br>(<0.1–2.7)        | 18.0<br>(13.9–22.0)       | 18.0<br>(13.9–22.0)       |
| Central Europe                                          | 40.6<br>(33.1–47.9)        | 27.0<br>(20.2–34.2)        | 1.0<br>(0.3–2.5)          | 1.6<br>(0.5–3.7)           | 10.0<br>(6.1–15.0)         | 10.0<br>(6.1–14.9)         | 1.0<br>(0.4–1.7)          | 1.0<br>(0.4–1.7)          | 8.3<br>(4.9–12.0)        | 9.8<br>(5.9–13.7)         | 19.4<br>(11.4–26.0)       | 3.5<br>(0.6–6.7)        | <0.1<br>(<0.1–0.1)       | <0.1<br>(<0.1–0.1)       | 21.0<br>(14.7–28.6)       | 21.0<br>(14.7–28.6)       |
| Albania                                                 | 45.9<br>(38.2–53.5)        | 12.0<br>(7.6–17.3)         | 3.8<br>(1.2–8.2)          | 5.6<br>(2.0–11.7)          | 9.5<br>(5.8–14.4)          | 9.4<br>(5.8–14.0)          | 1.7<br>(0.7–2.9)          | 1.7<br>(0.7–2.9)          | 10.1<br>(6.4–14.7)       | 16.1<br>(10.5–21.8)       | 9.4<br>(4.0–15.1)         | 1.2<br>(0.0–2.9)        | <0.1<br>(<0.1–0.1)       | <0.1<br>(<0.1–0.1)       | 19.2<br>(14.6–24.1)       | 19.2<br>(14.6–24.1)       |

|                        | Smoking             |                     | Household air pollution |                   | Ambient particulate matter |                    | Handwashing      |                  | Secondhand smoke   |                    | Alcohol use         |                   | High temperature    |                     | Low temperature     |                     |
|------------------------|---------------------|---------------------|-------------------------|-------------------|----------------------------|--------------------|------------------|------------------|--------------------|--------------------|---------------------|-------------------|---------------------|---------------------|---------------------|---------------------|
|                        | M                   | F                   | M                       | F                 | M                          | F                  | M                | F                | M                  | F                  | M                   | F                 | M                   | F                   | M                   | F                   |
| Bosnia and Herzegovina | 49.2<br>(41.1–56.9) | 32.6<br>(25.8–40.3) | 3.8<br>(1.2–8.5)        | 5.6<br>(2.0–11.7) | 14.6<br>(9.3–20.5)         | 14.3<br>(9.3–20.0) | 1.3<br>(0.5–2.1) | 1.3<br>(0.5–2.1) | 11.3<br>(7.0–15.9) | 14.4<br>(9.2–20.1) | 14.1<br>(7.4–19.6)  | 1.3<br>(0.0–3.1)  | <0.1<br>(<0.1–<0.1) | <0.1<br>(<0.1–<0.1) | 22.3<br>(15.8–29.9) | 22.3<br>(15.8–29.9) |
| Bulgaria               | 47.2<br>(39.1–55.0) | 30.9<br>(23.7–38.1) | 1.6<br>(0.4–4.2)        | 2.5<br>(0.7–5.8)  | 10.0<br>(6.2–14.9)         | 9.9<br>(6.2–14.7)  | 1.1<br>(0.4–1.8) | 1.1<br>(0.4–1.8) | 9.2<br>(5.7–13.4)  | 12.5<br>(7.7–17.3) | 20.0<br>(12.3–26.8) | 5.2<br>(1.4–9.1)  | <0.1<br>(<0.1–<0.1) | <0.1<br>(<0.1–<0.1) | 21.3<br>(14.8–27.9) | 21.3<br>(14.8–27.9) |
| Croatia                | 40.7<br>(32.7–48.8) | 32.7<br>(24.7–40.5) | 0.4<br>(0.1–1.1)        | 0.6<br>(0.2–1.7)  | 9.4<br>(5.7–14.3)          | 9.4<br>(5.7–14.2)  | 1.0<br>(0.4–1.6) | 1.0<br>(0.4–1.6) | 13.1<br>(8.0–18.3) | 13.1<br>(8.5–18.5) | 16.2<br>(8.3–23.0)  | 3.7<br>(0.0–8.0)  | <0.1<br>(<0.1–0.1)  | <0.1<br>(<0.1–0.1)  | 20.6<br>(13.3–27.4) | 20.6<br>(13.3–27.4) |
| Czechia                | 39.9<br>(32.7–47.4) | 26.2<br>(19.2–33.2) | 0.1<br>(<0.1–0.2)       | 0.1<br>(<0.1–0.4) | 8.4<br>(5.0–13.0)          | 8.4<br>(5.0–13.0)  | 0.9<br>(0.3–1.4) | 0.9<br>(0.3–1.4) | 8.9<br>(5.5–12.8)  | 8.5<br>(5.2–11.9)  | 21.1<br>(12.7–28.5) | 9.8<br>(4.3–15.2) | <0.1<br>(<0.1–0.2)  | <0.1<br>(<0.1–0.2)  | 21.1<br>(13.6–30.0) | 21.1<br>(13.6–30.0) |
| Hungary                | 40.6<br>(32.6–48.5) | 33.0<br>(25.4–40.7) | 1.3<br>(0.3–3.6)        | 2.0<br>(0.5–5.4)  | 8.4<br>(5.0–12.9)          | 8.4<br>(5.1–12.8)  | 0.9<br>(0.4–1.4) | 0.9<br>(0.4–1.4) | 10.7<br>(6.6–15.2) | 11.7<br>(7.4–16.5) | 19.6<br>(11.5–26.6) | 3.2<br>(0.0–6.9)  | <0.1<br>(<0.1–0.2)  | <0.1<br>(<0.1–0.2)  | 21.4<br>(11.9–30.6) | 21.4<br>(11.9–30.6) |
| Montenegro             | 49.0<br>(40.4–56.5) | 40.6<br>(31.8–49.0) | 2.7<br>(0.7–6.4)        | 4.0<br>(1.1–9.1)  | 10.9<br>(6.8–16.1)         | 10.8<br>(6.8–15.8) | 1.2<br>(0.5–2.0) | 1.2<br>(0.5–2.0) | 13.1<br>(8.4–18.3) | 13.4<br>(8.6–18.7) | 16.6<br>(8.9–23.4)  | 3.2<br>(0.0–7.4)  | <0.1<br>(<0.1–0.1)  | <0.1<br>(<0.1–0.1)  | 20.4<br>(14.1–28.1) | 20.4<br>(14.1–28.1) |
| North Macedonia        | 47.9<br>(40.3–55.5) | 30.6<br>(23.0–38.3) | 2.4<br>(0.7–5.6)        | 3.6<br>(1.2–7.8)  | 15.2<br>(9.7–21.6)         | 15.0<br>(9.7–21.2) | 1.0<br>(0.4–1.7) | 1.0<br>(0.4–1.7) | 11.9<br>(7.4–16.4) | 14.4<br>(9.2–19.8) | 15.3<br>(7.8–21.7)  | 0.8<br>(0.0–3.0)  | <0.1<br>(<0.1–0.1)  | <0.1<br>(<0.1–0.1)  | 21.8<br>(15.6–28.1) | 21.8<br>(15.6–28.1) |
| Poland                 | 39.3<br>(32.0–46.9) | 31.2<br>(23.6–38.7) | 0.9<br>(0.2–2.4)        | 1.4<br>(0.4–3.4)  | 11.6<br>(7.2–17.1)         | 11.6<br>(7.3–17.0) | 1.0<br>(0.4–1.6) | 1.0<br>(0.4–1.6) | 7.1<br>(4.1–10.6)  | 8.5<br>(5.1–12.0)  | 20.2<br>(11.8–26.9) | 1.6<br>(0.0–4.4)  | <0.1<br>(<0.1–0.2)  | <0.1<br>(<0.1–0.2)  | 21.1<br>(13.2–30.1) | 21.1<br>(13.2–30.1) |
| Romania                | 40.5<br>(32.3–48.3) | 19.9<br>(13.1–26.3) | 1.1<br>(0.3–2.7)        | 1.6<br>(0.4–4.1)  | 7.9<br>(4.7–12.1)          | 7.9<br>(4.8–12.1)  | 1.2<br>(0.5–2.0) | 1.2<br>(0.5–2.0) | 8.3<br>(4.9–12.3)  | 10.2<br>(6.0–14.7) | 18.9<br>(10.7–25.7) | 4.3<br>(0.6–8.4)  | <0.1<br>(<0.1–0.1)  | <0.1<br>(<0.1–0.1)  | 20.7<br>(14.2–28.2) | 20.7<br>(14.2–28.2) |
| Serbia                 | 45.3<br>(37.5–52.9) | 34.9<br>(26.2–42.9) | 1.9<br>(0.5–4.8)        | 2.9<br>(0.9–6.9)  | 13.0<br>(8.2–19.2)         | 12.9<br>(8.2–18.9) | 1.0<br>(0.4–1.6) | 1.0<br>(0.4–1.6) | 10.3<br>(6.0–14.6) | 10.8<br>(6.5–15.4) | 16.4<br>(8.7–23.0)  | 2.5<br>(0.3–5.0)  | <0.1<br>(<0.1–0.1)  | <0.1<br>(<0.1–0.1)  | 21.9<br>(14.8–28.9) | 21.9<br>(14.8–28.9) |
| Slovakia               | 34.1<br>(26.0–42.3) | 19.2<br>(12.8–26.0) | 0.1<br>(<0.1–0.2)       | 0.1<br>(<0.1–0.3) | 9.4<br>(5.5–14.5)          | 9.4<br>(5.5–14.4)  | 0.9<br>(0.3–1.4) | 0.9<br>(0.3–1.4) | 8.5<br>(5.0–12.7)  | 8.8<br>(5.3–12.6)  | 19.6<br>(11.2–26.3) | 2.5<br>(0.0–6.2)  | <0.1<br>(<0.1–0.1)  | <0.1<br>(<0.1–0.1)  | 20.2<br>(13.2–29.4) | 20.2<br>(13.2–29.4) |
| Slovenia               | 38.5<br>(30.9–46.1) | 30.5<br>(23.5–37.3) | 0.5<br>(0.1–1.5)        | 0.8<br>(0.2–2.2)  | 8.6<br>(5.3–13.3)          | 8.6<br>(5.3–13.2)  | 0.8<br>(0.3–1.4) | 0.8<br>(0.3–1.4) | 11.2<br>(6.9–15.7) | 10.1<br>(6.5–14.3) | 10.8<br>(1.2–20.2)  | 1.7<br>(0.0–5.9)  | <0.1<br>(<0.1–0.1)  | <0.1<br>(<0.1–0.1)  | 22.1<br>(15.2–30.1) | 22.1<br>(15.2–30.1) |
| Eastern Europe         | 48.6<br>(41.1–56.0) | 15.6<br>(10.9–20.5) | 0.2<br>(0.1–0.5)        | 0.3<br>(0.1–0.7)  | 5.6<br>(2.9–9.7)           | 5.5<br>(2.9–9.5)   | 2.4<br>(1.0–3.9) | 2.3<br>(0.9–3.8) | 6.4<br>(3.8–9.2)   | 14.3<br>(9.2–19.7) | 16.6<br>(9.0–23.1)  | 5.3<br>(1.6–9.1)  | <0.1<br>(<0.1–0.3)  | <0.1<br>(<0.1–0.3)  | 16.9<br>(1.3–30.4)  | 16.8<br>(0.4–30.8)  |
| Belarus                | 45.4<br>(36.7–53.1) | 15.2<br>(10.5–20.6) | 0.1<br>(<0.1–0.2)       | 0.1<br>(<0.1–0.3) | 8.2<br>(4.7–13.0)          | 8.2<br>(4.7–13.0)  | 1.9<br>(0.8–3.1) | 1.9<br>(0.8–3.1) | 5.3<br>(3.1–7.7)   | 13.5<br>(8.7–18.6) | 20.3<br>(11.6–27.5) | 6.1<br>(1.5–10.9) | <0.1<br>(<0.1–0.2)  | <0.1<br>(<0.1–0.2)  | 18.3<br>(9.6–30.8)  | 18.3<br>(9.6–30.8)  |
| Estonia                | 44.3<br>(36.8–52.2) | 24.7<br>(17.5–32.1) | 0.4<br>(<0.1–1.2)       | 0.6<br>(0.1–1.9)  | 1.7<br>(0.5–3.5)           | 1.9<br>(0.7–3.7)   | 1.8<br>(0.7–3.0) | 1.8<br>(0.7–3.0) | 6.9<br>(4.0–9.9)   | 9.6<br>(5.9–13.5)  | 21.1<br>(11.9–28.1) | 5.9<br>(0.7–10.9) | 0.1<br>(<0.1–0.5)   | 0.1<br>(<0.1–0.5)   | 15.8<br>(3.4–32.6)  | 15.8<br>(3.4–32.6)  |
| Latvia                 | 43.1<br>(34.7–51.7) | 18.5<br>(11.8–25.6) | 0.4<br>(0.1–1.1)        | 0.6<br>(0.1–1.7)  | 5.6<br>(3.1–9.1)           | 5.6<br>(3.1–9.1)   | 1.9<br>(0.8–3.1) | 1.9<br>(0.8–3.1) | 5.2<br>(2.9–7.9)   | 10.9<br>(6.4–15.9) | 19.7<br>(11.2–26.6) | 4.1<br>(0.0–8.5)  | <0.1<br>(<0.1–0.3)  | <0.1<br>(<0.1–0.3)  | 17.2<br>(7.2–31.3)  | 17.2<br>(7.2–31.3)  |
| Lithuania              | 39.1<br>(30.4–47.2) | 15.4<br>(10.2–21.4) | 0.2<br>(<0.1–0.5)       | 0.3<br>(<0.1–0.7) | 4.5<br>(2.3–7.6)           | 4.5<br>(2.3–7.6)   | 1.9<br>(0.8–3.2) | 1.9<br>(0.8–3.2) | 5.4<br>(3.1–8.0)   | 9.6<br>(5.7–13.9)  | 19.3<br>(11.1–26.3) | 7.2<br>(1.7–13.0) | <0.1<br>(<0.1–0.2)  | <0.1<br>(<0.1–0.2)  | 19.1<br>(9.2–31.0)  | 19.1<br>(9.2–31.0)  |
| Republic of Moldova    | 46.4<br>(38.2–54.1) | 7.7<br>(5.1–11.0)   | 0.7<br>(0.2–1.6)        | 1.1<br>(0.4–2.4)  | 6.7<br>(3.3–11.9)          | 6.7<br>(3.4–11.9)  | 4.6<br>(1.9–7.4) | 4.6<br>(1.9–7.4) | 6.3<br>(4.0–9.0)   | 13.2<br>(8.7–18.1) | 17.4<br>(9.3–24.0)  | 5.4<br>(1.1–9.8)  | <0.1<br>(<0.1–0.1)  | <0.1<br>(<0.1–0.1)  | 22.1<br>(13.3–30.8) | 22.1<br>(13.3–30.8) |

|                           | Smoking                     |                             | Household air pollution      |                              | Ambient particulate matter |                          | Handwashing              |                          | Secondhand smoke          |                           | Alcohol use                |                           | High temperature         |                          | Low temperature             |                             |
|---------------------------|-----------------------------|-----------------------------|------------------------------|------------------------------|----------------------------|--------------------------|--------------------------|--------------------------|---------------------------|---------------------------|----------------------------|---------------------------|--------------------------|--------------------------|-----------------------------|-----------------------------|
|                           | M                           | F                           | M                            | F                            | M                          | F                        | M                        | F                        | M                         | F                         | M                          | F                         | M                        | F                        | M                           | F                           |
| Russian Federation        | 49.6<br>(42.1–56.9)         | 16.3<br>(11.4–21.4)         | 0.1<br>(<0.1–0.4)            | 0.2<br>(0.1–0.6)             | 5.2<br>(2.6–9.0)           | 5.2<br>(2.6–9.0)         | 2.2<br>(0.9–3.5)         | 2.2<br>(0.9–3.6)         | 6.5<br>(3.8–9.4)          | 14.6<br>(9.5–20.0)        | 17.1<br>(9.5–23.6)         | 5.2<br>(1.4–9.2)          | <0.1<br>(<0.1–0.4)       | <0.1<br>(<0.1–0.4)       | 16.1<br>(<0.1–32.2)         | 16.1<br>(<0.1–32.3)         |
| Ukraine                   | 46.1<br>(37.6–53.9)         | 13.0<br>(8.3–18.3)          | 0.4<br>(0.1–0.9)             | 0.5<br>(0.2–1.3)             | 7.1<br>(3.7–12.3)          | 7.1<br>(3.7–12.3)        | 3.1<br>(1.2–5.0)         | 3.1<br>(1.2–5.0)         | 6.4<br>(3.8–9.4)          | 13.5<br>(8.7–18.8)        | 13.5<br>(6.4–20.4)         | 5.7<br>(1.7–10.1)         | <0.1<br>(<0.1–0.2)       | <0.1<br>(<0.1–0.2)       | 19.7<br>(13.3–26.3)         | 19.7<br>(13.3–26.2)         |
| <b>High-income</b>        | <b>35.0<br/>(28.4–41.6)</b> | <b>24.8<br/>(19.1–30.6)</b> | <b>0.1<br/>(&lt;0.1–0.1)</b> | <b>0.1<br/>(&lt;0.1–0.2)</b> | <b>5.2<br/>(2.9–8.5)</b>   | <b>4.6<br/>(2.5–7.7)</b> | <b>1.4<br/>(0.6–2.4)</b> | <b>1.4<br/>(0.5–2.3)</b> | <b>7.1<br/>(4.2–10.0)</b> | <b>7.2<br/>(4.4–10.1)</b> | <b>13.6<br/>(6.8–19.2)</b> | <b>6.6<br/>(2.4–10.6)</b> | <b>0.5<br/>(0.2–0.9)</b> | <b>0.6<br/>(0.3–0.9)</b> | <b>17.2<br/>(12.9–22.1)</b> | <b>17.0<br/>(12.7–22.1)</b> |
| Australasia               | 27.2<br>(21.0–33.8)         | 22.0<br>(16.2–28.0)         | <0.1<br>(<0.1–<0.1)          | <0.1<br>(<0.1–0.1)           | 1.9<br>(0.4–4.2)           | 1.9<br>(0.4–4.2)         | 1.9<br>(0.8–3.2)         | 1.9<br>(0.8–3.2)         | 6.3<br>(3.6–9.4)          | 5.6<br>(3.1–8.3)          | 17.9<br>(10.2–24.4)        | 7.3<br>(1.8–12.3)         | 6.1<br>(4.1–8.1)         | 6.3<br>(4.2–8.5)         | 8.1<br>(5.2–11.2)           | 7.8<br>(4.8–10.7)           |
| Australia                 | 27.8<br>(21.7–34.4)         | 22.3<br>(16.4–28.2)         | <0.1<br>(<0.1–<0.1)          | <0.1<br>(<0.1–0.1)           | 1.9<br>(0.5–4.3)           | 1.9<br>(0.5–4.3)         | 1.9<br>(0.8–3.2)         | 1.9<br>(0.8–3.2)         | 6.3<br>(3.5–9.4)          | 5.7<br>(3.2–8.4)          | 18.3<br>(10.5–25.3)        | 7.0<br>(1.6–12.3)         | 7.3<br>(4.8–9.7)         | 7.3<br>(4.8–9.7)         | 5.9<br>(2.7–8.9)            | 5.9<br>(2.7–8.9)            |
| New Zealand               | 23.7<br>(17.3–30.3)         | 20.5<br>(14.2–27.2)         | <0.1<br>(<0.1–<0.1)          | <0.1<br>(<0.1–0.1)           | 1.5<br>(0.2–3.5)           | 1.5<br>(0.3–3.5)         | 1.9<br>(0.8–3.2)         | 2.0<br>(0.8–3.2)         | 6.2<br>(3.4–9.3)          | 5.1<br>(2.8–7.6)          | 15.9<br>(8.1–22.0)         | 8.7<br>(2.9–13.8)         | <0.1<br>(<0.1–<0.1)      | <0.1<br>(<0.1–<0.1)      | 20.6<br>(13.5–28.0)         | 20.6<br>(13.4–27.8)         |
| High-income Asia Pacific  | 39.0<br>(31.4–46.3)         | 12.3<br>(8.9–16.0)          | <0.1<br>(<0.1–<0.1)          | <0.1<br>(<0.1–0.1)           | 8.0<br>(4.6–12.9)          | 8.0<br>(4.5–12.8)        | 1.9<br>(0.7–3.1)         | 1.9<br>(0.7–3.1)         | 6.2<br>(3.6–9.0)          | 9.3<br>(5.6–13.2)         | 10.5<br>(4.3–16.5)         | 4.9<br>(1.3–8.6)          | 0.5<br>(<0.1–1.3)        | 0.5<br>(<0.1–1.4)        | 16.0<br>(12.7–19.5)         | 15.4<br>(12.2–18.7)         |
| Brunei Darussalam         | 31.7<br>(24.9–39.1)         | 8.7<br>(5.3–13.9)           | <0.1<br>(<0.1–0.1)           | 0.1<br>(<0.1–0.2)            | 2.6<br>(0.8–5.4)           | 2.6<br>(0.8–5.4)         | 2.0<br>(0.8–3.2)         | 2.0<br>(0.8–3.2)         | 5.7<br>(3.3–8.5)          | 7.8<br>(4.5–11.2)         | 0.2<br>(0.0–1.2)           | 0.1<br>(0.0–0.5)          | 0.9<br>(<0.1–5.8)        | 0.9<br>(<0.1–5.8)        | <0.1<br>(<0.1–0.5)          | <0.1<br>(<0.1–0.5)          |
| Japan                     | 39.6<br>(32.0–46.9)         | 14.4<br>(10.3–18.8)         | <0.1<br>(<0.1–<0.1)          | <0.1<br>(<0.1–0.1)           | 6.4<br>(3.4–10.4)          | 6.4<br>(3.4–10.4)        | 1.9<br>(0.7–3.1)         | 1.9<br>(0.7–3.1)         | 6.5<br>(3.7–9.6)          | 9.7<br>(5.8–13.8)         | 9.5<br>(3.3–16.1)          | 4.5<br>(0.7–8.6)          | 0.5<br>(<0.1–1.0)        | 0.5<br>(<0.1–1.0)        | 16.1<br>(12.9–19.5)         | 16.1<br>(13.0–19.6)         |
| Republic of Korea         | 40.9<br>(33.1–48.3)         | 6.2<br>(3.9–9.0)            | <0.1<br>(<0.1–<0.1)          | <0.1<br>(<0.1–<0.1)          | 14.2<br>(8.6–21.1)         | 14.2<br>(8.6–21.1)       | 1.9<br>(0.7–3.1)         | 1.9<br>(0.7–3.1)         | 5.7<br>(3.3–8.5)          | 9.6<br>(5.7–13.8)         | 16.8<br>(9.3–23.6)         | 8.8<br>(3.7–13.8)         | 0.2<br>(<0.1–0.9)        | 0.2<br>(<0.1–0.9)        | 20.4<br>(14.7–25.9)         | 20.4<br>(14.7–25.9)         |
| Singapore                 | 25.5<br>(18.8–32.8)         | 7.7<br>(4.9–11.1)           | <0.1<br>(<0.1–<0.1)          | <0.1<br>(<0.1–0.1)           | 9.5<br>(5.0–16.2)          | 9.5<br>(5.0–16.2)        | 1.9<br>(0.8–3.1)         | 1.9<br>(0.8–3.1)         | 4.6<br>(2.4–7.1)          | 5.5<br>(3.0–8.2)          | 2.5<br>(0.0–5.9)           | 0.9<br>(0.0–2.5)          | 1.3<br>(<0.1–11.7)       | 1.3<br>(<0.1–11.7)       | 0.1<br>(<0.1–1.2)           | 0.1<br>(<0.1–1.2)           |
| High-income North America | 31.7<br>(25.5–38.0)         | 25.6<br>(20.1–31.2)         | <0.1<br>(<0.1–<0.1)          | <0.1<br>(<0.1–<0.1)          | 2.6<br>(1.1–4.9)           | 2.6<br>(1.2–4.9)         | 1.0<br>(0.4–1.6)         | 1.0<br>(0.4–1.6)         | 7.0<br>(4.2–10.0)         | 6.1<br>(3.9–8.7)          | 11.7<br>(6.0–17.0)         | 6.2<br>(2.1–9.9)          | 0.6<br>(0.3–1.0)         | 0.6<br>(0.3–1.0)         | 15.6<br>(11.7–19.7)         | 15.4<br>(11.7–19.5)         |
| Canada                    | 30.8<br>(24.2–37.7)         | 25.9<br>(19.9–32.3)         | <0.1<br>(<0.1–<0.1)          | <0.1<br>(<0.1–<0.1)          | 2.2<br>(0.9–4.4)           | 2.2<br>(0.9–4.4)         | 1.0<br>(0.4–1.7)         | 1.0<br>(0.4–1.7)         | 7.1<br>(4.4–10.6)         | 6.0<br>(3.7–8.6)          | 13.2<br>(6.6–19.1)         | 6.8<br>(2.1–11.6)         | <0.1<br>(<0.1–0.3)       | <0.1<br>(<0.1–0.3)       | 20.8<br>(0.8–39.3)          | 20.8<br>(0.8–39.3)          |
| United States of America  | 31.8<br>(25.6–38.2)         | 25.6<br>(20.0–31.2)         | <0.1<br>(<0.1–<0.1)          | <0.1<br>(<0.1–<0.1)          | 2.6<br>(1.2–4.9)           | 2.6<br>(1.2–5.0)         | 1.0<br>(0.4–1.6)         | 1.0<br>(0.4–1.6)         | 7.0<br>(4.2–10.0)         | 6.1<br>(3.9–8.8)          | 11.7<br>(5.9–16.7)         | 6.1<br>(2.1–9.9)          | 0.6<br>(0.3–1.0)         | 0.7<br>(0.3–1.0)         | 15.2<br>(11.7–18.9)         | 15.1<br>(11.6–18.7)         |
| Southern Latin America    | 34.7<br>(27.8–41.7)         | 29.5<br>(22.1–37.3)         | 0.3<br>(0.1–0.8)             | 0.5<br>(0.1–1.1)             | 6.9<br>(3.7–11.5)          | 6.8<br>(3.7–11.3)        | 2.4<br>(1.0–4.0)         | 2.5<br>(1.0–4.1)         | 8.1<br>(4.6–12.0)         | 8.3<br>(4.7–12.2)         | 14.8<br>(7.5–21.5)         | 6.3<br>(1.8–11.2)         | 0.8<br>(0.5–1.3)         | 0.9<br>(0.5–1.3)         | 16.2<br>(10.3–22.6)         | 16.1<br>(10.3–22.4)         |
| Argentina                 | 34.9<br>(27.8–41.9)         | 29.8<br>(22.4–37.4)         | 0.3<br>(0.1–0.8)             | 0.4<br>(0.1–1.1)             | 6.5<br>(3.4–11.1)          | 6.5<br>(3.4–11.0)        | 2.5<br>(1.0–4.1)         | 2.5<br>(1.0–4.1)         | 8.0<br>(4.6–12.0)         | 8.3<br>(4.7–12.3)         | 14.9<br>(7.4–21.7)         | 6.3<br>(1.7–11.4)         | 0.9<br>(0.5–1.4)         | 0.9<br>(0.5–1.4)         | 16.1<br>(10.5–22.4)         | 16.1<br>(10.5–22.4)         |
| Chile                     | 32.5<br>(23.5–40.7)         | 26.5<br>(18.1–34.8)         | 0.5<br>(0.1–1.3)             | 0.8<br>(0.2–2.1)             | 11.7<br>(7.1–18.0)         | 11.7<br>(7.1–17.9)       | 2.0<br>(0.8–3.4)         | 2.0<br>(0.8–3.4)         | 8.1<br>(4.2–12.8)         | 7.7<br>(3.8–12.0)         | 14.7<br>(7.2–21.3)         | 6.7<br>(2.1–11.6)         | <0.1<br>(<0.1–<0.1)      | <0.1<br>(<0.1–<0.1)      | 19.3<br>(10.4–29.4)         | 19.3<br>(10.4–29.4)         |
| Uruguay                   | 37.6<br>(30.3–45.1)         | 26.5<br>(19.7–33.5)         | 0.2<br>(0.1–0.6)             | 0.4<br>(0.1–0.9)             | 4.0<br>(1.7–7.6)           | 4.0<br>(1.8–7.6)         | 2.3<br>(0.9–3.7)         | 2.3<br>(0.9–3.7)         | 9.3<br>(5.4–13.7)         | 9.8<br>(5.8–14.1)         | 12.9<br>(6.2–19.3)         | 6.2<br>(2.2–10.5)         | 0.1<br>(<0.1–0.3)        | 0.1<br>(<0.1–0.3)        | 8.0<br>(4.5–11.6)           | 8.0<br>(4.5–11.6)           |

|                | Smoking             |                     | Household air pollution |                     | Ambient particulate matter |                    | Handwashing      |                  | Secondhand smoke   |                    | Alcohol use         |                    | High temperature    |                     | Low temperature     |                     |
|----------------|---------------------|---------------------|-------------------------|---------------------|----------------------------|--------------------|------------------|------------------|--------------------|--------------------|---------------------|--------------------|---------------------|---------------------|---------------------|---------------------|
|                | M                   | F                   | M                       | F                   | M                          | F                  | M                | F                | M                  | F                  | M                   | F                  | M                   | F                   | M                   | F                   |
| Western Europe | 35.7<br>(28.7–42.6) | 26.5<br>(20.1–33.1) | <0.1<br>(<0.1–<0.1)     | <0.1<br>(<0.1–0.1)  | 4.9<br>(2.7–8.2)           | 4.9<br>(2.7–8.1)   | 1.0<br>(0.4–1.7) | 1.0<br>(0.4–1.7) | 7.3<br>(4.4–10.5)  | 7.1<br>(4.3–10.0)  | 17.5<br>(9.7–23.6)  | 8.4<br>(3.5–12.8)  | 0.1<br>(<0.1–0.2)   | 0.1<br>(<0.1–0.2)   | 21.1<br>(15.1–28.0) | 21.5<br>(15.1–28.6) |
| Andorra        | 36.3<br>(28.0–44.7) | 24.4<br>(16.7–33.0) | <0.1<br>(<0.1–<0.1)     | <0.1<br>(<0.1–<0.1) | 3.5<br>(1.7–6.3)           | 3.5<br>(1.7–6.3)   | 1.0<br>(0.4–1.6) | 1.0<br>(0.4–1.6) | 8.1<br>(4.8–11.9)  | 8.2<br>(4.9–11.8)  | 17.1<br>(9.1–23.6)  | 7.6<br>(2.2–12.5)  | <0.1<br>(<0.1–<0.1) | <0.1<br>(<0.1–<0.1) | 17.0<br>(1.9–35.8)  | 17.0<br>(1.9–35.8)  |
| Austria        | 43.4<br>(35.4–50.8) | 31.7<br>(24.9–39.0) | <0.1<br>(<0.1–0.1)      | <0.1<br>(<0.1–0.1)  | 5.6<br>(3.1–9.1)           | 5.6<br>(3.1–9.1)   | 1.0<br>(0.4–1.6) | 1.0<br>(0.4–1.6) | 10.9<br>(6.9–15.0) | 9.3<br>(5.9–13.1)  | 18.4<br>(10.4–25.1) | 8.2<br>(2.8–13.3)  | <0.1<br>(<0.1–0.1)  | <0.1<br>(<0.1–0.1)  | 19.7<br>(10.6–31.5) | 19.7<br>(10.6–31.5) |
| Belgium        | 38.0<br>(31.1–45.0) | 30.2<br>(23.9–36.6) | <0.1<br>(<0.1–<0.1)     | <0.1<br>(<0.1–<0.1) | 5.9<br>(3.4–9.7)           | 5.9<br>(3.4–9.7)   | 1.0<br>(0.4–1.6) | 1.0<br>(0.4–1.6) | 7.8<br>(4.7–11.3)  | 7.4<br>(4.6–10.5)  | 18.2<br>(9.6–25.1)  | 10.4<br>(4.4–16.1) | <0.1<br>(<0.1–0.1)  | <0.1<br>(<0.1–0.1)  | 23.4<br>(14.7–32.7) | 23.4<br>(14.7–32.7) |
| Cyprus         | 46.6<br>(38.7–54.0) | 23.3<br>(17.0–30.1) | <0.1<br>(<0.1–<0.1)     | <0.1<br>(<0.1–0.1)  | 7.7<br>(4.5–12.5)          | 7.7<br>(4.5–12.5)  | 1.0<br>(0.4–1.6) | 1.0<br>(0.4–1.6) | 8.7<br>(5.4–12.4)  | 12.0<br>(7.4–17.0) | 17.4<br>(9.3–24.2)  | 3.2<br>(0.1–6.8)   | 2.1<br>(0.9–3.6)    | 2.1<br>(0.9–3.6)    | 4.5<br>(<0.1–10.9)  | 4.5<br>(<0.1–10.9)  |
| Denmark        | 37.1<br>(30.0–44.2) | 31.3<br>(24.7–37.8) | <0.1<br>(<0.1–<0.1)     | <0.1<br>(<0.1–<0.1) | 4.0<br>(2.1–7.2)           | 4.0<br>(2.1–7.2)   | 1.0<br>(0.4–1.6) | 1.0<br>(0.4–1.6) | 7.4<br>(4.5–10.7)  | 6.5<br>(4.0–9.3)   | 15.2<br>(7.4–21.9)  | 9.4<br>(3.4–15.6)  | <0.1<br>(<0.1–<0.1) | <0.1<br>(<0.1–<0.1) | 23.2<br>(13.0–34.4) | 23.2<br>(13.0–34.4) |
| Finland        | 32.3<br>(25.5–39.2) | 23.1<br>(17.3–29.5) | <0.1<br>(<0.1–<0.1)     | <0.1<br>(<0.1–<0.1) | 1.2<br>(0.2–2.9)           | 1.2<br>(0.2–2.9)   | 1.0<br>(0.4–1.7) | 1.0<br>(0.4–1.7) | 5.2<br>(3.0–7.9)   | 4.9<br>(2.8–7.2)   | 15.0<br>(7.9–21.5)  | 5.0<br>(0.3–9.8)   | <0.1<br>(<0.1–0.3)  | <0.1<br>(<0.1–0.3)  | 17.9<br>(3.8–36.4)  | 17.9<br>(3.8–36.4)  |
| France         | 35.2<br>(27.9–42.5) | 24.1<br>(17.3–31.6) | <0.1<br>(<0.1–<0.1)     | <0.1<br>(<0.1–<0.1) | 5.1<br>(2.8–8.5)           | 5.1<br>(2.8–8.5)   | 1.0<br>(0.4–1.7) | 1.0<br>(0.4–1.7) | 5.2<br>(2.9–8.0)   | 5.1<br>(2.8–7.6)   | 19.5<br>(10.7–27.0) | 10.2<br>(4.1–16.0) | <0.1<br>(<0.1–0.1)  | <0.1<br>(<0.1–0.1)  | 21.7<br>(14.9–28.4) | 21.7<br>(14.9–28.4) |
| Germany        | 36.7<br>(29.2–43.7) | 26.4<br>(19.9–33.2) | <0.1<br>(<0.1–<0.1)     | <0.1<br>(<0.1–<0.1) | 5.3<br>(3.0–8.8)           | 5.3<br>(3.0–8.8)   | 1.0<br>(0.4–1.6) | 1.0<br>(0.4–1.6) | 7.0<br>(4.0–10.3)  | 6.5<br>(3.8–9.5)   | 21.7<br>(13.2–28.9) | 14.0<br>(7.2–20.1) | <0.1<br>(<0.1–0.2)  | <0.1<br>(<0.1–0.2)  | 22.5<br>(14.3–31.1) | 22.5<br>(14.3–31.1) |
| Greece         | 47.8<br>(40.1–55.3) | 36.1<br>(28.0–43.7) | <0.1<br>(<0.1–0.1)      | 0.1<br>(<0.1–0.2)   | 6.9<br>(4.0–10.9)          | 6.9<br>(4.0–10.9)  | 1.0<br>(0.4–1.7) | 1.0<br>(0.4–1.7) | 10.4<br>(6.3–15.0) | 11.9<br>(7.5–16.5) | 16.8<br>(9.4–23.4)  | 2.1<br>(0.0–5.4)   | 0.1<br>(<0.1–0.3)   | 0.1<br>(<0.1–0.3)   | 15.7<br>(12.3–19.4) | 15.7<br>(12.3–19.4) |
| Iceland        | 31.1<br>(24.2–38.2) | 24.7<br>(18.6–31.3) | <0.1<br>(<0.1–<0.1)     | <0.1<br>(<0.1–<0.1) | 1.2<br>(0.2–3.0)           | 1.2<br>(0.2–3.0)   | 1.0<br>(0.4–1.7) | 1.0<br>(0.4–1.7) | 9.7<br>(6.3–14.0)  | 8.6<br>(5.6–12.2)  | 13.4<br>(6.4–19.7)  | 5.4<br>(0.6–10.2)  | <0.1<br>(0.0–0.0)   | <0.1<br>(0.0–0.0)   | 21.5<br>(5.1–38.7)  | 21.5<br>(5.1–38.7)  |
| Ireland        | 30.3<br>(23.6–36.9) | 26.1<br>(19.3–33.1) | <0.1<br>(<0.1–<0.1)     | <0.1<br>(<0.1–<0.1) | 2.7<br>(1.2–5.1)           | 2.7<br>(1.2–5.1)   | 1.0<br>(0.4–1.6) | 1.0<br>(0.4–1.6) | 7.0<br>(3.9–10.4)  | 6.4<br>(3.7–9.3)   | 15.3<br>(8.2–21.6)  | 7.1<br>(2.1–12.1)  | <0.1<br>(0.0–0.0)   | <0.1<br>(0.0–0.0)   | 25.7<br>(14.4–37.2) | 25.7<br>(14.4–37.2) |
| Israel         | 34.6<br>(27.9–41.6) | 20.3<br>(14.7–26.4) | <0.1<br>(<0.1–<0.1)     | <0.1<br>(<0.1–0.1)  | 10.1<br>(6.1–15.3)         | 10.1<br>(6.1–15.3) | 1.0<br>(0.4–1.7) | 1.0<br>(0.4–1.7) | 7.2<br>(4.0–10.7)  | 6.6<br>(3.6–9.6)   | 3.9<br>(0.0–8.1)    | 0.9<br>(0.0–2.8)   | 2.1<br>(0.8–3.9)    | 2.1<br>(0.8–3.9)    | 3.5<br>(<0.1–10.4)  | 3.5<br>(<0.1–10.4)  |
| Italy          | 34.1<br>(27.1–41.0) | 23.6<br>(17.0–30.2) | <0.1<br>(<0.1–0.1)      | <0.1<br>(<0.1–0.1)  | 7.8<br>(4.6–12.1)          | 7.8<br>(4.6–12.1)  | 1.0<br>(0.4–1.7) | 1.0<br>(0.4–1.7) | 10.0<br>(5.9–14.2) | 9.3<br>(5.6–13.2)  | 16.8<br>(9.2–23.3)  | 6.7<br>(2.8–10.6)  | 0.1<br>(<0.1–0.2)   | 0.1<br>(<0.1–0.2)   | 17.3<br>(13.2–21.5) | 17.3<br>(13.1–21.5) |
| Luxembourg     | 33.8<br>(26.1–41.2) | 23.4<br>(16.8–30.5) | <0.1<br>(<0.1–<0.1)     | <0.1<br>(<0.1–<0.1) | 4.2<br>(2.2–7.3)           | 4.2<br>(2.2–7.3)   | 1.0<br>(0.4–1.6) | 1.0<br>(0.4–1.6) | 7.4<br>(4.4–10.8)  | 8.2<br>(5.0–12.0)  | 19.5<br>(10.9–26.5) | 8.8<br>(3.1–14.4)  | <0.1<br>(<0.1–0.1)  | <0.1<br>(<0.1–0.1)  | 23.1<br>(13.3–33.6) | 23.1<br>(13.3–33.6) |
| Malta          | 37.2<br>(29.8–44.6) | 23.1<br>(17.1–29.1) | <0.1<br>(<0.1–<0.1)     | <0.1<br>(<0.1–0.1)  | 6.1<br>(3.4–9.9)           | 6.1<br>(3.4–9.9)   | 1.0<br>(0.4–1.7) | 1.0<br>(0.4–1.7) | 8.1<br>(5.0–11.7)  | 8.1<br>(5.0–11.6)  | 14.1<br>(7.1–20.5)  | 4.1<br>(0.3–7.9)   | 0.3<br>(<0.1–0.9)   | 0.3<br>(<0.1–0.9)   | 3.6<br>(<0.1–15.0)  | 3.6<br>(<0.1–15.0)  |
| Monaco         | 36.2<br>(27.6–44.4) | 26.1<br>(17.1–35.9) | <0.1<br>(<0.1–<0.1)     | <0.1<br>(<0.1–<0.1) | 5.3<br>(2.5–9.2)           | 5.3<br>(2.5–9.2)   | 1.0<br>(0.4–1.6) | 1.0<br>(0.4–1.6) | 8.4<br>(4.9–11.9)  | 7.9<br>(4.8–11.4)  | 9.7<br>(0.0–23.5)   | 4.1<br>(0.0–12.4)  | <0.1<br>(<0.1–0.1)  | <0.1<br>(<0.1–0.1)  | 15.4<br>(11.9–19.0) | 15.4<br>(11.9–19.0) |
| Netherlands    | 32.4<br>(25.2–39.5) | 27.5<br>(20.5–34.9) | <0.1<br>(<0.1–<0.1)     | <0.1<br>(<0.1–<0.1) | 5.5<br>(3.1–9.0)           | 5.5<br>(3.1–9.0)   | 1.0<br>(0.4–1.6) | 1.0<br>(0.4–1.6) | 7.0<br>(4.0–10.6)  | 6.3<br>(3.6–9.6)   | 15.8<br>(8.0–22.6)  | 9.2<br>(3.6–14.9)  | <0.1<br>(<0.1–0.1)  | <0.1<br>(<0.1–0.1)  | 23.6<br>(13.4–33.5) | 23.6<br>(13.4–33.5) |

|                                     | Smoking                     |                            | Household air pollution  |                          | Ambient particulate matter |                           | Handwashing               |                           | Secondhand smoke         |                          | Alcohol use               |                          | High temperature         |                              | Low temperature          |                          |
|-------------------------------------|-----------------------------|----------------------------|--------------------------|--------------------------|----------------------------|---------------------------|---------------------------|---------------------------|--------------------------|--------------------------|---------------------------|--------------------------|--------------------------|------------------------------|--------------------------|--------------------------|
|                                     | M                           | F                          | M                        | F                        | M                          | F                         | M                         | F                         | M                        | F                        | M                         | F                        | M                        | F                            | M                        | F                        |
| Norway                              | 31.8<br>(25.2–38.9)         | 26.6<br>(19.5–34.0)        | <0.1<br>(<0.1–<0.1)      | <0.1<br>(<0.1–<0.1)      | 1.8<br>(0.6–3.9)           | 1.8<br>(0.6–3.9)          | 1.0<br>(0.4–1.6)          | 1.0<br>(0.4–1.6)          | 6.9<br>(3.9–10.2)        | 5.9<br>(3.4–8.6)         | 11.6<br>(5.0–17.7)        | 4.6<br>(0.1–9.2)         | <0.1<br>(<0.1–0.1)       | <0.1<br>(<0.1–0.1)           | 19.1<br>(5.8–35.9)       | 19.0<br>(5.9–35.9)       |
| Portugal                            | 35.4<br>(27.5–43.0)         | 14.9<br>(10.1–20.2)        | <0.1<br>(<0.1–0.1)       | 0.1<br>(<0.1–0.2)        | 3.0<br>(1.4–5.5)           | 3.0<br>(1.4–5.5)          | 1.1<br>(0.4–1.8)          | 1.1<br>(0.4–1.8)          | 6.6<br>(3.7–9.7)         | 8.4<br>(4.8–12.1)        | 19.1<br>(11.0–25.9)       | 6.5<br>(2.6–10.3)        | 0.2<br>(<0.1–0.3)        | 0.2<br>(<0.1–0.3)            | 15.3<br>(11.7–19.2)      | 15.3<br>(11.7–19.2)      |
| San Marino                          | 32.9<br>(25.6–41.0)         | 24.0<br>(17.2–32.2)        | <0.1<br>(<0.1–<0.1)      | <0.1<br>(<0.1–<0.1)      | 4.1<br>(1.5–7.9)           | 4.1<br>(1.5–7.9)          | 1.0<br>(0.4–1.7)          | 1.0<br>(0.4–1.7)          | 9.0<br>(5.6–13.0)        | 8.9<br>(5.7–12.9)        | 15.9<br>(0.0–25.6)        | 7.6<br>(0.0–14.9)        | 0.1<br>(<0.1–0.2)        | 0.1<br>(<0.1–0.2)            | 15.7<br>(12.5–19.0)      | 15.7<br>(12.5–19.0)      |
| Spain                               | 42.1<br>(34.3–49.9)         | 29.9<br>(22.1–37.6)        | 0.1<br>(<0.1–0.2)        | 0.1<br>(<0.1–0.3)        | 4.0<br>(2.1–6.9)           | 4.0<br>(2.1–6.9)          | 1.0<br>(0.4–1.7)          | 1.0<br>(0.4–1.7)          | 8.5<br>(4.9–12.5)        | 8.7<br>(5.3–12.3)        | 16.3<br>(8.7–23.1)        | 5.7<br>(1.7–9.7)         | 0.2<br>(<0.1–0.5)        | 0.2<br>(<0.1–0.5)            | 17.3<br>(13.3–21.5)      | 17.3<br>(13.3–21.5)      |
| Sweden                              | 26.9<br>(21.0–32.9)         | 27.9<br>(21.6–34.4)        | <0.1<br>(<0.1–<0.1)      | <0.1<br>(<0.1–<0.1)      | 1.2<br>(0.3–3.0)           | 1.2<br>(0.3–3.0)          | 1.0<br>(0.4–1.7)          | 1.0<br>(0.4–1.7)          | 7.3<br>(4.5–10.6)        | 5.2<br>(3.2–7.7)         | 15.6<br>(7.9–22.4)        | 11.4<br>(4.5–17.3)       | <0.1<br>(<0.1–0.1)       | <0.1<br>(<0.1–0.1)           | 18.5<br>(5.4–32.9)       | 18.5<br>(5.3–33.0)       |
| Switzerland                         | 32.4<br>(25.6–39.2)         | 26.0<br>(19.5–32.4)        | <0.1<br>(<0.1–<0.1)      | <0.1<br>(<0.1–<0.1)      | 4.1<br>(2.2–7.0)           | 4.1<br>(2.2–7.0)          | 1.0<br>(0.4–1.6)          | 1.0<br>(0.4–1.6)          | 7.2<br>(4.1–10.9)        | 6.8<br>(4.0–10.0)        | 15.9<br>(7.9–22.6)        | 11.8<br>(5.0–18.0)       | <0.1<br>(<0.1–<0.1)      | <0.1<br>(<0.1–<0.1)          | 21.1<br>(11.3–32.9)      | 21.1<br>(11.3–32.9)      |
| United Kingdom                      | 32.2<br>(25.3–39.0)         | 27.0<br>(20.0–34.0)        | <0.1<br>(<0.1–<0.1)      | <0.1<br>(<0.1–<0.1)      | 4.1<br>(2.1–7.0)           | 4.1<br>(2.1–7.0)          | 1.0<br>(0.4–1.7)          | 1.0<br>(0.4–1.7)          | 7.2<br>(4.0–10.5)        | 6.9<br>(4.0–10.1)        | 14.2<br>(7.2–20.6)        | 5.8<br>(1.1–10.8)        | <0.1<br>(<0.1–<0.1)      | <0.1<br>(<0.1–<0.1)          | 24.8<br>(15.9–34.9)      | 24.8<br>(15.8–35.0)      |
| <b>Latin America and Caribbean</b>  | <b>23.3<br/>(17.5–29.5)</b> | <b>13.5<br/>(9.4–17.7)</b> | <b>3.0<br/>(1.4–5.3)</b> | <b>4.9<br/>(2.6–7.9)</b> | <b>8.3<br/>(5.2–12.6)</b>  | <b>8.2<br/>(5.3–12.3)</b> | <b>6.6<br/>(2.7–10.5)</b> | <b>6.8<br/>(2.8–10.8)</b> | <b>5.9<br/>(3.2–8.7)</b> | <b>5.9<br/>(3.2–8.7)</b> | <b>9.9<br/>(5.1–14.2)</b> | <b>1.8<br/>(0.2–3.3)</b> | <b>1.4<br/>(0.1–4.2)</b> | <b>1.4<br/>(&lt;0.1–4.2)</b> | <b>2.9<br/>(1.2–4.8)</b> | <b>3.0<br/>(1.3–4.8)</b> |
| Andean Latin America                | 14.5<br>(9.5–19.7)          | 3.8<br>(2.0–6.2)           | 3.5<br>(1.4–6.8)         | 5.3<br>(2.5–9.4)         | 13.7<br>(8.4–20.9)         | 13.3<br>(8.2–19.9)        | 7.8<br>(3.3–12.4)         | 7.8<br>(3.3–12.5)         | 2.7<br>(1.0–5.1)         | 2.5<br>(1.0–4.6)         | 9.0<br>(3.2–14.1)         | 1.1<br>(0.0–3.5)         | 0.5<br>(<0.1–1.3)        | 0.6<br>(<0.1–1.4)            | 9.3<br>(5.8–13.2)        | 9.2<br>(5.8–13.0)        |
| Bolivia<br>(Plurinational State of) | 19.6<br>(13.5–25.7)         | 4.5<br>(1.7–7.9)           | 6.0<br>(2.5–11.7)        | 8.7<br>(4.1–15.1)        | 12.9<br>(7.4–20.6)         | 12.3<br>(7.2–19.3)        | 8.4<br>(3.5–13.2)         | 8.4<br>(3.5–13.2)         | 2.4<br>(0.8–4.6)         | 2.3<br>(0.8–4.3)         | 7.5<br>(1.8–13.0)         | 0.8<br>(0.0–2.9)         | 1.5<br>(0.5–2.7)         | 1.5<br>(0.5–2.7)             | 9.1<br>(5.9–12.6)        | 9.1<br>(5.9–12.6)        |
| Ecuador                             | 20.4<br>(13.4–26.9)         | 5.1<br>(2.8–7.8)           | 0.9<br>(0.3–2.1)         | 1.4<br>(0.5–3.2)         | 10.2<br>(5.4–16.6)         | 10.2<br>(5.5–16.4)        | 6.9<br>(2.8–11.0)         | 6.9<br>(2.8–11.0)         | 2.5<br>(0.9–4.8)         | 2.4<br>(0.8–4.5)         | 7.5<br>(3.5–11.7)         | 0.6<br>(0.0–1.8)         | 0.3<br>(<0.1–1.2)        | 0.3<br>(<0.1–1.2)            | 5.8<br>(3.6–8.1)         | 5.8<br>(3.6–8.1)         |
| Peru                                | 10.7<br>(6.5–15.4)          | 3.2<br>(1.6–5.2)           | 3.3<br>(1.3–6.5)         | 5.0<br>(2.2–8.9)         | 15.2<br>(9.3–23.1)         | 14.8<br>(9.3–22.2)        | 7.9<br>(3.3–12.5)         | 7.9<br>(3.3–12.5)         | 2.9<br>(1.0–5.3)         | 2.6<br>(1.0–4.8)         | 10.1<br>(3.3–16.3)        | 1.4<br>(0.0–4.1)         | 0.2<br>(<0.1–0.9)        | 0.2<br>(<0.1–0.9)            | 10.4<br>(6.0–15.2)       | 10.4<br>(6.0–15.2)       |
| Caribbean                           | 27.8<br>(21.0–34.9)         | 13.2<br>(9.0–18.2)         | 9.2<br>(4.5–15.6)        | 15.9<br>(9.5–23.9)       | 7.7<br>(3.7–14.0)          | 7.0<br>(3.5–12.5)         | 11.6<br>(5.1–18.1)        | 12.5<br>(5.5–19.4)        | 5.8<br>(3.2–8.5)         | 5.4<br>(3.0–8.0)         | 9.9<br>(4.9–14.1)         | 2.2<br>(0.5–3.9)         | 1.0<br>(<0.1–3.2)        | 1.0<br>(<0.1–3.2)            | <0.1<br>(<0.1–1.3)       | <0.1<br>(<0.1–1.3)       |
| Antigua and Barbuda                 | 19.7<br>(14.2–25.6)         | 8.0<br>(5.1–12.1)          | 0.1<br>(<0.1–0.3)        | 0.2<br>(<0.1–0.4)        | 8.7<br>(2.7–18.4)          | 8.7<br>(2.7–18.4)         | 7.5<br>(3.1–11.9)         | 7.5<br>(3.1–11.9)         | 5.9<br>(3.4–8.8)         | 5.2<br>(2.8–7.7)         | 9.9<br>(4.6–15.0)         | 2.4<br>(0.5–4.6)         | 0.4<br>(<0.1–2.3)        | 0.4<br>(<0.1–2.3)            | 0.3<br>(<0.1–1.7)        | 0.3<br>(<0.1–1.7)        |
| Bahamas                             | 18.6<br>(13.4–23.8)         | 5.7<br>(3.5–8.5)           | 0.1<br>(<0.1–0.4)        | 0.2<br>(<0.1–0.5)        | 7.6<br>(1.7–16.5)          | 7.6<br>(1.7–16.4)         | 6.3<br>(2.6–10.2)         | 6.3<br>(2.6–10.2)         | 6.2<br>(3.5–9.3)         | 6.3<br>(3.7–9.1)         | 8.1<br>(0.7–15.1)         | 1.9<br>(0.0–4.7)         | 1.6<br>(<0.1–4.5)        | 1.6<br>(<0.1–4.5)            | 0.3<br>(<0.1–2.0)        | 0.3<br>(<0.1–2.0)        |
| Barbados                            | 16.1<br>(11.7–21.2)         | 5.1<br>(3.2–7.6)           | <0.1<br>(<0.1–<0.1)      | <0.1<br>(<0.1–<0.1)      | 10.8<br>(3.8–21.4)         | 10.8<br>(3.8–21.4)        | 7.1<br>(2.9–11.4)         | 7.1<br>(2.9–11.4)         | 4.3<br>(2.3–6.5)         | 4.1<br>(2.2–6.2)         | 14.2<br>(8.1–19.4)        | 2.0<br>(0.0–4.2)         | 1.2<br>(<0.1–3.9)        | 1.2<br>(<0.1–3.9)            | 0.4<br>(<0.1–2.0)        | 0.4<br>(<0.1–2.0)        |
| Belize                              | 25.7<br>(18.5–32.7)         | 5.6<br>(3.4–8.3)           | 2.7<br>(1.0–5.7)         | 4.1<br>(1.7–7.9)         | 10.6<br>(3.3–20.9)         | 10.4<br>(3.6–20.5)        | 9.5<br>(4.0–15.0)         | 9.5<br>(4.0–15.0)         | 4.9<br>(2.6–7.5)         | 6.6<br>(3.6–9.9)         | 10.7<br>(5.5–15.3)        | 1.0<br>(0.1–2.1)         | 1.7<br>(<0.1–4.2)        | 1.7<br>(<0.1–4.2)            | 0.1<br>(<0.1–1.3)        | 0.1<br>(<0.1–1.3)        |
| Cuba                                | 39.6<br>(31.4–47.3)         | 24.4<br>(17.3–32.2)        | 0.2<br>(0.1–0.6)         | 0.4<br>(0.1–0.9)         | 8.8<br>(3.7–16.9)          | 8.8<br>(3.7–16.9)         | 6.0<br>(2.5–9.6)          | 6.0<br>(2.5–9.6)          | 7.8<br>(4.5–11.4)        | 8.1<br>(4.9–11.7)        | 9.4<br>(4.2–14.1)         | 2.1<br>(0.3–4.1)         | 1.5<br>(<0.1–4.0)        | 1.5<br>(<0.1–4.0)            | 0.2<br>(<0.1–1.6)        | 0.2<br>(<0.1–1.6)        |

|                                  | Smoking             |                    | Household air pollution |                     | Ambient particulate matter |                    | Handwashing        |                    | Secondhand smoke  |                   | Alcohol use        |                  | High temperature  |                   | Low temperature    |                    |
|----------------------------------|---------------------|--------------------|-------------------------|---------------------|----------------------------|--------------------|--------------------|--------------------|-------------------|-------------------|--------------------|------------------|-------------------|-------------------|--------------------|--------------------|
|                                  | M                   | F                  | M                       | F                   | M                          | F                  | M                  | F                  | M                 | F                 | M                  | F                | M                 | F                 | M                  | F                  |
| Dominica                         | 18.3<br>(12.8–24.4) | 5.9<br>(3.5–9.0)   | 1.0<br>(0.3–2.3)        | 1.5<br>(0.4–3.4)    | 9.4<br>(3.2–19.0)          | 9.4<br>(3.3–18.9)  | 8.3<br>(3.5–13.2)  | 8.3<br>(3.5–13.2)  | 4.5<br>(2.3–7.0)  | 4.4<br>(2.3–6.8)  | 11.5<br>(6.0–16.9) | 3.0<br>(0.9–5.6) | 1.1<br>(<0.1–3.5) | 1.1<br>(<0.1–3.5) | 0.3<br>(<0.1–3.2)  | 0.3<br>(<0.1–3.2)  |
| Dominican Republic               | 24.3<br>(18.6–30.6) | 14.8<br>(9.8–20.9) | 1.8<br>(0.6–4.0)        | 2.7<br>(1.0–5.6)    | 8.9<br>(3.3–17.9)          | 8.8<br>(3.4–17.7)  | 16.0<br>(7.1–24.3) | 16.0<br>(7.1–24.3) | 5.8<br>(3.3–8.5)  | 5.2<br>(2.9–7.6)  | 8.9<br>(3.8–14.0)  | 1.7<br>(0.1–3.6) | 0.6<br>(<0.1–2.2) | 0.6<br>(<0.1–2.2) | <0.1<br>(<0.1–1.7) | <0.1<br>(<0.1–1.7) |
| Grenada                          | 21.1<br>(14.4–27.9) | 6.3<br>(3.6–9.9)   | 0.4<br>(0.1–0.9)        | 0.6<br>(0.2–1.4)    | 10.8<br>(3.4–21.5)         | 10.8<br>(3.5–21.4) | 7.6<br>(3.2–12.2)  | 7.6<br>(3.2–12.2)  | 4.2<br>(2.0–6.9)  | 4.3<br>(2.1–6.8)  | 13.2<br>(6.8–18.5) | 3.9<br>(1.3–6.6) | 1.4<br>(<0.1–4.2) | 1.4<br>(<0.1–4.2) | 0.3<br>(<0.1–1.8)  | 0.3<br>(<0.1–1.8)  |
| Guyana                           | 23.9<br>(16.7–30.8) | 5.3<br>(2.9–8.0)   | 1.1<br>(0.4–2.3)        | 1.6<br>(0.6–3.3)    | 10.1<br>(3.2–20.5)         | 10.0<br>(3.2–20.3) | 14.1<br>(6.1–21.9) | 14.1<br>(6.1–21.9) | 5.2<br>(2.7–7.8)  | 5.4<br>(2.7–8.2)  | 13.1<br>(6.8–19.1) | 0.6<br>(0.0–1.9) | 0.9<br>(<0.1–2.8) | 0.9<br>(<0.1–2.8) | <0.1<br>(<0.1–1.3) | <0.1<br>(<0.1–1.3) |
| Haiti                            | 15.5<br>(9.9–21.3)  | 4.1<br>(2.3–6.4)   | 33.4<br>(19.8–47.8)     | 41.2<br>(27.9–53.7) | 6.3<br>(2.7–12.2)          | 5.1<br>(2.2–9.8)   | 19.5<br>(8.7–29.2) | 19.5<br>(8.7–29.2) | 3.0<br>(1.4–5.0)  | 2.8<br>(1.2–4.6)  | 11.0<br>(5.7–15.8) | 2.4<br>(0.8–4.3) | 0.8<br>(<0.1–3.0) | 0.8<br>(<0.1–3.0) | <0.1<br>(<0.1–1.3) | <0.1<br>(<0.1–1.3) |
| Jamaica                          | 29.3<br>(22.5–36.6) | 9.4<br>(6.2–13.4)  | 1.3<br>(0.4–3.0)        | 2.0<br>(0.7–4.4)    | 7.7<br>(3.9–13.2)          | 7.7<br>(4.0–13.0)  | 11.2<br>(4.8–17.4) | 11.2<br>(4.8–17.4) | 6.0<br>(3.3–8.9)  | 7.0<br>(4.0–10.2) | 7.3<br>(2.7–11.9)  | 1.5<br>(0.0–3.1) | 1.2<br>(<0.1–4.3) | 1.2<br>(<0.1–4.3) | 0.1<br>(<0.1–1.1)  | 0.1<br>(<0.1–1.1)  |
| Saint Kitts and Nevis            | 15.7<br>(11.1–21.1) | 4.6<br>(2.7–7.4)   | 0.2<br>(<0.1–0.6)       | 0.4<br>(0.1–1.0)    | 3.5<br>(1.3–6.7)           | 3.5<br>(1.4–6.7)   | 7.6<br>(3.2–12.1)  | 7.6<br>(3.2–12.1)  | 5.7<br>(3.0–8.7)  | 5.6<br>(3.2–8.5)  | 4.6<br>(0.0–13.7)  | 1.0<br>(0.0–4.3) | 1.0<br>(<0.1–3.9) | 1.0<br>(<0.1–3.9) | 0.4<br>(<0.1–2.3)  | 0.4<br>(<0.1–2.3)  |
| Saint Lucia                      | 25.0<br>(18.3–31.9) | 6.7<br>(4.3–9.9)   | 0.5<br>(0.1–1.1)        | 0.7<br>(0.3–1.6)    | 10.7<br>(3.6–21.1)         | 10.7<br>(3.8–21.0) | 5.7<br>(2.3–9.2)   | 5.7<br>(2.3–9.2)   | 4.7<br>(2.4–7.3)  | 4.4<br>(2.3–6.8)  | 13.5<br>(7.7–19.1) | 3.8<br>(0.8–7.3) | 1.7<br>(<0.1–4.8) | 1.7<br>(<0.1–4.8) | 0.3<br>(<0.1–1.9)  | 0.3<br>(<0.1–1.9)  |
| Saint Vincent and the Grenadines | 22.0<br>(15.1–29.0) | 5.0<br>(2.8–7.7)   | 0.6<br>(0.2–1.4)        | 0.9<br>(0.3–2.0)    | 10.6<br>(3.3–21.3)         | 10.6<br>(3.4–21.1) | 9.1<br>(3.8–14.3)  | 9.1<br>(3.8–14.3)  | 4.7<br>(2.4–7.3)  | 5.1<br>(2.7–7.9)  | 12.4<br>(6.4–17.6) | 3.5<br>(1.2–5.8) | 1.3<br>(<0.1–4.0) | 1.3<br>(<0.1–4.0) | 0.4<br>(<0.1–2.0)  | 0.4<br>(<0.1–2.0)  |
| Suriname                         | 35.3<br>(26.6–43.4) | 11.7<br>(7.3–17.1) | 1.5<br>(0.5–3.6)        | 2.3<br>(0.8–5.1)    | 10.7<br>(4.1–20.6)         | 10.6<br>(4.2–20.4) | 9.3<br>(3.9–14.9)  | 9.3<br>(3.9–14.9)  | 7.0<br>(3.9–10.6) | 9.6<br>(5.4–14.1) | 9.9<br>(4.3–15.0)  | 2.3<br>(0.3–4.6) | 1.0<br>(<0.1–3.0) | 1.0<br>(<0.1–3.0) | 0.3<br>(<0.1–1.6)  | 0.3<br>(<0.1–1.6)  |
| Trinidad and Tobago              | 29.2<br>(21.4–37.1) | 8.1<br>(4.9–12.2)  | <0.1<br>(<0.1–<0.1)     | <0.1<br>(<0.1–0.1)  | 11.0<br>(3.1–22.8)         | 11.0<br>(3.1–22.8) | 6.8<br>(2.8–10.9)  | 6.8<br>(2.8–10.9)  | 5.5<br>(2.8–8.7)  | 7.3<br>(3.8–11.2) | 10.5<br>(4.7–15.8) | 3.3<br>(0.5–6.3) | 0.4<br>(<0.1–2.6) | 0.4<br>(<0.1–2.6) | 0.2<br>(<0.1–1.2)  | 0.2<br>(<0.1–1.2)  |
| Central Latin America            | 19.7<br>(13.5–26.1) | 7.7<br>(4.6–11.0)  | 4.0<br>(1.8–6.9)        | 6.3<br>(3.4–10.2)   | 10.6<br>(6.8–15.7)         | 10.4<br>(6.8–15.3) | 5.8<br>(2.4–9.3)   | 6.0<br>(2.5–9.6)   | 3.8<br>(1.5–6.6)  | 3.7<br>(1.5–6.8)  | 9.5<br>(4.8–13.5)  | 1.6<br>(0.2–3.1) | 1.2<br>(0.1–3.2)  | 1.2<br>(0.1–3.1)  | 4.5<br>(2.3–6.7)   | 4.4<br>(2.3–6.6)   |
| Colombia                         | 19.7<br>(13.3–26.2) | 10.6<br>(6.7–15.1) | 1.7<br>(0.6–3.8)        | 2.6<br>(1.0–5.3)    | 11.2<br>(6.4–17.6)         | 11.1<br>(6.5–17.4) | 6.1<br>(2.5–9.9)   | 6.1<br>(2.5–9.9)   | 5.0<br>(2.2–8.2)  | 4.3<br>(2.0–7.1)  | 9.0<br>(4.1–13.5)  | 0.8<br>(0.0–2.3) | 1.0<br>(<0.1–3.4) | 1.0<br>(<0.1–3.4) | 3.4<br>(1.8–5.1)   | 3.4<br>(1.8–5.1)   |
| Costa Rica                       | 24.3<br>(18.4–30.6) | 9.1<br>(5.7–12.9)  | 0.8<br>(0.2–1.9)        | 1.2<br>(0.4–2.8)    | 8.9<br>(5.2–13.8)          | 8.8<br>(5.2–13.7)  | 6.8<br>(2.8–10.9)  | 6.8<br>(2.8–10.9)  | 6.7<br>(3.8–10.1) | 6.9<br>(3.8–10.3) | 8.3<br>(3.3–12.8)  | 1.0<br>(0.0–2.6) | 0.3<br>(<0.1–2.2) | 0.3<br>(<0.1–2.2) | 0.6<br>(<0.1–2.7)  | 0.6<br>(<0.1–2.7)  |
| El Salvador                      | 18.1<br>(12.8–23.5) | 5.7<br>(3.5–8.7)   | 2.9<br>(1.2–5.7)        | 4.3<br>(2.0–7.6)    | 11.3<br>(5.9–18.3)         | 11.0<br>(6.0–17.6) | 9.0<br>(3.8–14.4)  | 9.0<br>(3.8–14.4)  | 4.1<br>(2.1–6.6)  | 3.3<br>(1.7–5.3)  | 6.1<br>(2.3–9.5)   | 1.1<br>(0.0–2.5) | 1.4<br>(<0.1–6.7) | 1.4<br>(<0.1–6.7) | <0.1<br>(<0.1–0.6) | <0.1<br>(<0.1–0.6) |
| Guatemala                        | 17.2<br>(11.0–23.6) | 5.0<br>(2.7–7.9)   | 13.8<br>(6.3–24.3)      | 19.0<br>(10.1–30.7) | 12.0<br>(7.5–17.9)         | 10.9<br>(6.7–16.0) | 7.6<br>(3.2–12.1)  | 7.6<br>(3.2–12.1)  | 3.1<br>(1.1–5.5)  | 3.2<br>(1.2–5.8)  | 3.2<br>(0.6–6.1)   | 0.6<br>(0.0–1.5) | 1.7<br>(0.5–3.5)  | 1.7<br>(0.5–3.5)  | 1.5<br>(<0.1–3.2)  | 1.5<br>(<0.1–3.2)  |
| Honduras                         | 23.5<br>(17.5–30.0) | 6.9<br>(3.8–10.7)  | 17.3<br>(8.9–28.3)      | 23.3<br>(13.4–34.7) | 9.6<br>(6.0–14.5)          | 8.5<br>(5.3–12.7)  | 5.4<br>(2.2–8.6)   | 5.4<br>(2.2–8.6)   | 6.0<br>(3.1–9.3)  | 6.6<br>(3.5–10.1) | 6.7<br>(3.3–10.0)  | 0.7<br>(0.1–1.4) | 0.7<br>(<0.1–2.6) | 0.7<br>(<0.1–2.6) | <0.1<br>(<0.1–2.4) | <0.1<br>(<0.1–2.4) |
| Mexico                           | 19.7<br>(12.9–26.8) | 7.5<br>(4.2–11.0)  | 2.3<br>(0.9–4.4)        | 3.5<br>(1.7–6.3)    | 10.2<br>(6.3–15.5)         | 10.1<br>(6.3–15.0) | 5.0<br>(2.0–8.0)   | 5.0<br>(2.0–8.1)   | 2.8<br>(0.8–5.7)  | 3.2<br>(0.9–6.6)  | 11.4<br>(6.1–15.9) | 2.4<br>(0.4–4.4) | 1.2<br>(0.4–2.1)  | 1.2<br>(0.3–2.0)  | 7.6<br>(4.7–10.5)  | 7.7<br>(4.8–10.7)  |

|                                       | Smoking                     |                          | Household air pollution  |                          | Ambient particulate matter  |                             | Handwashing              |                           | Secondhand smoke          |                            | Alcohol use              |                          | High temperature         |                          | Low temperature           |                           |
|---------------------------------------|-----------------------------|--------------------------|--------------------------|--------------------------|-----------------------------|-----------------------------|--------------------------|---------------------------|---------------------------|----------------------------|--------------------------|--------------------------|--------------------------|--------------------------|---------------------------|---------------------------|
|                                       | M                           | F                        | M                        | F                        | M                           | F                           | M                        | F                         | M                         | F                          | M                        | F                        | M                        | F                        | M                         | F                         |
| Nicaragua                             | 19.9<br>(13.8–26.5)         | 5.3<br>(3.1–8.3)         | 13.4<br>(5.9–23.7)       | 18.5<br>(9.8–29.4)       | 9.2<br>(5.4–14.8)           | 8.4<br>(4.9–13.5)           | 8.1<br>(3.4–12.8)        | 8.1<br>(3.4–12.8)         | 5.6<br>(2.6–9.0)          | 5.5<br>(2.6–8.8)           | 7.0<br>(3.3–10.2)        | 0.7<br>(0.1–1.4)         | 0.8<br>(<0.1–4.9)        | 0.8<br>(<0.1–4.9)        | <0.1<br>(<0.1–1.1)        | <0.1<br>(<0.1–1.1)        |
| Panama                                | 16.5<br>(12.0–21.5)         | 4.8<br>(2.9–7.4)         | 1.3<br>(0.4–2.7)         | 1.9<br>(0.6–4.1)         | 6.5<br>(3.2–10.9)           | 6.5<br>(3.3–10.9)           | 6.1<br>(2.5–9.8)         | 6.1<br>(2.5–9.8)          | 4.5<br>(2.6–6.6)          | 4.2<br>(2.3–6.3)           | 11.5<br>(6.3–16.6)       | 2.4<br>(0.4–4.4)         | 0.6<br>(<0.1–2.3)        | 0.6<br>(<0.1–2.3)        | <0.1<br>(<0.1–1.0)        | <0.1<br>(<0.1–1.0)        |
| Venezuela<br>(Bolivarian Republic of) | 21.6<br>(14.6–28.6)         | 10.6<br>(6.1–15.7)       | 0.1<br>(<0.1–0.2)        | 0.1<br>(<0.1–0.2)        | 11.1<br>(5.9–18.6)          | 11.1<br>(5.9–18.6)          | 5.7<br>(2.4–9.2)         | 5.7<br>(2.4–9.2)          | 5.5<br>(2.5–9.2)          | 5.5<br>(2.5–8.9)           | 10.4<br>(5.5–15.3)       | 1.9<br>(0.3–4.0)         | 1.2<br>(<0.1–9.4)        | 1.2<br>(<0.1–9.4)        | 0.1<br>(<0.1–1.7)         | 0.1<br>(<0.1–1.7)         |
| Tropical Latin America                | 26.6<br>(20.4–33.2)         | 19.3<br>(14.0–25.0)      | 1.4<br>(0.5–3.1)         | 2.1<br>(0.8–4.1)         | 5.8<br>(3.3–9.4)            | 5.8<br>(3.4–9.3)            | 6.0<br>(2.4–9.6)         | 6.0<br>(2.4–9.7)          | 7.8<br>(4.6–11.4)         | 8.1<br>(4.7–11.6)          | 10.3<br>(5.3–14.8)       | 2.0<br>(0.4–3.7)         | 1.8<br>(<0.1–5.9)        | 1.8<br>(<0.1–6.2)        | 1.1<br>(<0.1–3.3)         | 1.1<br>(<0.1–3.2)         |
| Brazil                                | 26.6<br>(20.5–33.1)         | 19.4<br>(14.1–25.1)      | 1.3<br>(0.4–2.9)         | 2.0<br>(0.7–4.0)         | 5.8<br>(3.3–9.3)            | 5.8<br>(3.3–9.3)            | 6.0<br>(2.4–9.6)         | 6.0<br>(2.4–9.6)          | 7.8<br>(4.6–11.4)         | 8.1<br>(4.7–11.6)          | 10.2<br>(5.2–14.7)       | 2.0<br>(0.4–3.7)         | 1.7<br>(<0.1–5.9)        | 1.7<br>(<0.1–6.2)        | 1.1<br>(<0.1–3.3)         | 1.1<br>(<0.1–3.2)         |
| Paraguay                              | 30.3<br>(22.3–38.9)         | 11.3<br>(6.6–16.4)       | 6.1<br>(2.2–12.2)        | 9.0<br>(3.8–16.3)        | 6.3<br>(3.5–10.6)           | 6.1<br>(3.6–10.2)           | 7.9<br>(3.3–12.7)        | 7.9<br>(3.3–12.7)         | 7.1<br>(3.9–10.6)         | 8.7<br>(4.9–12.8)          | 14.9<br>(7.9–20.9)       | 2.1<br>(0.0–4.8)         | 5.2<br>(2.9–7.6)         | 5.2<br>(2.9–7.6)         | 0.9<br>(<0.1–5.0)         | 0.9<br>(<0.1–5.0)         |
| <b>North Africa and Middle East</b>   | <b>36.6<br/>(29.7–43.6)</b> | <b>6.0<br/>(4.2–8.0)</b> | <b>2.4<br/>(1.2–3.8)</b> | <b>4.0<br/>(2.5–5.8)</b> | <b>21.3<br/>(14.6–29.1)</b> | <b>20.8<br/>(14.4–28.1)</b> | <b>6.1<br/>(2.5–9.8)</b> | <b>6.4<br/>(2.7–10.1)</b> | <b>9.7<br/>(6.1–13.6)</b> | <b>14.6<br/>(9.3–19.9)</b> | <b>1.1<br/>(0.3–1.8)</b> | <b>0.2<br/>(0.0–0.4)</b> | <b>5.7<br/>(3.5–8.0)</b> | <b>5.7<br/>(3.6–8.0)</b> | <b>7.0<br/>(3.2–11.2)</b> | <b>7.0<br/>(3.3–10.9)</b> |
| Afghanistan                           | 20.8<br>(15.4–27.1)         | 3.9<br>(2.3–6.0)         | 32.5<br>(19.2–44.6)      | 38.0<br>(26.3–49.2)      | 12.7<br>(6.2–20.9)          | 9.8<br>(4.3–17.4)           | 15.7<br>(6.8–23.8)       | 15.7<br>(6.8–23.8)        | 9.2<br>(5.4–13.4)         | 11.6<br>(6.8–16.6)         | 0.1<br>(0.0–0.3)         | <0.1<br>(0.0–<0.1)       | 3.1<br>(1.9–4.2)         | 3.1<br>(1.9–4.2)         | 13.7<br>(9.0–19.6)        | 13.7<br>(9.0–19.6)        |
| Algeria                               | 35.9<br>(28.4–43.2)         | 3.1<br>(1.9–4.9)         | <0.1<br>(<0.1–0.1)       | 0.1<br>(<0.1–0.1)        | 16.6<br>(9.1–25.5)          | 16.6<br>(9.1–25.5)          | 4.9<br>(2.0–7.9)         | 4.9<br>(2.0–7.9)          | 11.9<br>(7.4–17.0)        | 18.9<br>(12.2–25.6)        | 1.5<br>(0.4–2.8)         | 0.1<br>(0.0–0.4)         | 9.2<br>(6.2–12.2)        | 9.2<br>(6.2–12.2)        | 4.3<br>(<0.1–10.1)        | 4.3<br>(<0.1–10.1)        |
| Bahrain                               | 28.0<br>(21.5–35.3)         | 7.6<br>(4.5–11.2)        | 0.1<br>(<0.1–0.1)        | 0.1<br>(<0.1–0.2)        | 26.5<br>(17.9–36.4)         | 26.5<br>(17.9–36.4)         | 4.6<br>(1.9–7.4)         | 4.6<br>(1.9–7.4)          | 10.3<br>(6.4–14.7)        | 12.0<br>(7.7–17.0)         | 2.1<br>(0.5–3.8)         | 0.2<br>(0.0–0.6)         | 11.6<br>(5.8–16.6)       | 11.6<br>(5.8–16.6)       | 2.0<br>(<0.1–10.1)        | 2.0<br>(<0.1–10.1)        |
| Egypt                                 | 41.6<br>(33.6–49.2)         | 1.6<br>(0.9–2.6)         | <0.1<br>(<0.1–<0.1)      | <0.1<br>(<0.1–0.1)       | 28.9<br>(19.3–40.0)         | 28.9<br>(19.3–40.0)         | 3.8<br>(1.5–6.3)         | 3.8<br>(1.5–6.3)          | 8.5<br>(5.2–12.0)         | 15.5<br>(9.8–21.3)         | 0.5<br>(0.0–1.3)         | <0.1<br>(0.0–0.2)        | 7.7<br>(4.8–10.9)        | 7.7<br>(4.8–10.9)        | 2.7<br>(<0.1–9.1)         | 2.7<br>(<0.1–9.1)         |
| Iran (Islamic Republic of)            | 32.8<br>(26.0–39.8)         | 7.5<br>(4.9–10.7)        | <0.1<br>(<0.1–0.1)       | 0.1<br>(<0.1–0.1)        | 18.8<br>(12.3–26.5)         | 18.8<br>(12.3–26.5)         | 4.3<br>(1.7–7.0)         | 4.3<br>(1.7–7.0)          | 9.4<br>(5.7–13.5)         | 13.1<br>(8.3–18.6)         | 1.5<br>(0.8–2.3)         | 0.2<br>(0.1–0.4)         | 3.2<br>(2.1–4.3)         | 3.2<br>(2.2–4.3)         | 13.3<br>(10.1–16.4)       | 13.2<br>(10.1–16.4)       |
| Iraq                                  | 40.6<br>(33.3–47.9)         | 9.0<br>(6.1–12.6)        | <0.1<br>(<0.1–0.1)       | 0.1<br>(<0.1–0.2)        | 22.7<br>(14.6–32.4)         | 22.7<br>(14.6–32.3)         | 2.7<br>(1.1–4.5)         | 2.7<br>(1.1–4.5)          | 11.8<br>(7.4–16.6)        | 15.9<br>(10.2–21.8)        | 0.8<br>(0.0–1.9)         | 0.1<br>(0.0–0.3)         | 10.8<br>(7.5–13.8)       | 10.8<br>(7.5–13.8)       | 4.7<br>(<0.1–10.6)        | 4.7<br>(<0.1–10.6)        |
| Jordan                                | 44.7<br>(37.0–52.0)         | 12.5<br>(8.5–17.1)       | <0.1<br>(<0.1–<0.1)      | <0.1<br>(<0.1–<0.1)      | 15.7<br>(9.8–23.4)          | 15.7<br>(9.8–23.4)          | 4.2<br>(1.7–6.9)         | 4.2<br>(1.7–6.9)          | 11.2<br>(6.8–15.7)        | 16.0<br>(10.0–22.1)        | 1.1<br>(0.0–2.5)         | 0.1<br>(0.0–0.3)         | 3.2<br>(1.7–4.9)         | 3.2<br>(1.7–4.9)         | 6.0<br>(<0.1–12.1)        | 6.0<br>(<0.1–12.1)        |
| Kuwait                                | 33.7<br>(27.3–40.9)         | 5.7<br>(3.4–8.8)         | <0.1<br>(<0.1–<0.1)      | <0.1<br>(<0.1–<0.1)      | 27.1<br>(18.5–36.9)         | 27.1<br>(18.5–36.9)         | 3.7<br>(1.5–6.0)         | 3.7<br>(1.5–6.0)          | 11.2<br>(7.1–15.8)        | 18.0<br>(12.0–24.5)        | 0.1<br>(0.0–0.3)         | <0.1<br>(0.0–<0.1)       | 13.1<br>(7.6–18.0)       | 13.1<br>(7.6–18.0)       | 3.1<br>(<0.1–15.6)        | 3.1<br>(<0.1–15.6)        |
| Lebanon                               | 46.7<br>(38.7–54.3)         | 33.6<br>(26.1–41.2)      | <0.1<br>(<0.1–0.1)       | 0.1<br>(<0.1–0.1)        | 14.9<br>(9.0–22.6)          | 14.9<br>(9.0–22.6)          | 5.0<br>(2.1–8.0)         | 5.0<br>(2.1–8.0)          | 14.1<br>(9.1–19.4)        | 15.0<br>(9.7–20.8)         | 3.0<br>(1.3–4.8)         | 0.2<br>(0.0–0.6)         | 0.1<br>(<0.1–0.2)        | 0.1<br>(<0.1–0.2)        | 14.0<br>(10.4–17.5)       | 14.0<br>(10.4–17.5)       |
| Libya                                 | 39.9<br>(32.8–46.8)         | 1.3<br>(0.7–2.2)         | <0.1<br>(<0.1–0.1)       | 0.1<br>(<0.1–0.1)        | 19.0<br>(11.0–29.3)         | 19.0<br>(11.0–29.3)         | 4.5<br>(1.9–7.4)         | 4.5<br>(1.9–7.4)          | 13.6<br>(8.6–18.7)        | 19.7<br>(13.0–26.3)        | 0.8<br>(0.1–1.3)         | 0.1<br>(<0.1–0.2)        | 8.2<br>(4.7–12.0)        | 8.2<br>(4.7–12.0)        | 2.8<br>(<0.1–9.8)         | 2.8<br>(<0.1–9.8)         |
| Morocco                               | 27.7<br>(20.9–34.7)         | 2.0<br>(1.2–3.2)         | 0.9<br>(0.3–1.8)         | 1.3<br>(0.5–2.7)         | 17.4<br>(10.8–25.2)         | 17.3<br>(10.7–24.9)         | 7.6<br>(3.2–12.2)        | 7.6<br>(3.2–12.2)         | 8.5<br>(5.0–12.3)         | 11.2<br>(6.8–15.9)         | 0.8<br>(0.0–1.8)         | <0.1<br>(0.0–<0.1)       | 2.5<br>(1.6–3.4)         | 2.5<br>(1.6–3.4)         | 8.2<br>(4.8–11.8)         | 8.2<br>(4.8–11.8)         |

|                                               | Smoking                     |                          | Household air pollution    |                             | Ambient particulate matter  |                             | Handwashing                |                            | Secondhand smoke          |                            | Alcohol use               |                          | High temperature             |                              | Low temperature              |                              |
|-----------------------------------------------|-----------------------------|--------------------------|----------------------------|-----------------------------|-----------------------------|-----------------------------|----------------------------|----------------------------|---------------------------|----------------------------|---------------------------|--------------------------|------------------------------|------------------------------|------------------------------|------------------------------|
|                                               | M                           | F                        | M                          | F                           | M                           | F                           | M                          | F                          | M                         | F                          | M                         | F                        | M                            | F                            | M                            | F                            |
| Oman                                          | 21.5<br>(16.2–27.4)         | 2.7<br>(1.6–4.3)         | 0.1<br>(<0.1–0.2)          | 0.1<br>(<0.1–0.3)           | 21.4<br>(12.7–31.3)         | 21.4<br>(12.7–31.3)         | 5.0<br>(2.0–8.2)           | 5.0<br>(2.0–8.2)           | 8.5<br>(5.0–12.3)         | 9.8<br>(6.0–14.0)          | 0.4<br>(0.0–1.1)          | <0.1<br>(0.0–0.2)        | 6.6<br>(<0.1–22.3)           | 6.6<br>(<0.1–22.3)           | 1.3<br>(<0.1–13.3)           | 1.3<br>(<0.1–13.3)           |
| Palestine                                     | 43.3<br>(35.0–51.3)         | 4.9<br>(2.9–7.6)         | 0.2<br>(0.1–0.4)           | 0.3<br>(0.1–0.6)            | 15.9<br>(9.5–24.7)          | 15.9<br>(9.5–24.7)          | 7.1<br>(3.0–11.4)          | 7.1<br>(3.0–11.4)          | 11.5<br>(7.0–16.0)        | 18.0<br>(11.7–24.4)        | 3.1<br>(1.6–4.6)          | 0.6<br>(0.2–1.1)         | 2.2<br>(0.9–4.0)             | 2.2<br>(0.9–4.0)             | 3.9<br>(<0.1–10.5)           | 3.9<br>(<0.1–10.5)           |
| Qatar                                         | 26.6<br>(20.2–33.3)         | 2.8<br>(1.6–4.7)         | <0.1<br>(<0.1–<0.1)        | <0.1<br>(<0.1–<0.1)         | 31.1<br>(22.0–41.1)         | 31.1<br>(22.0–41.1)         | 3.8<br>(1.5–6.3)           | 3.8<br>(1.5–6.3)           | 11.0<br>(6.9–15.6)        | 14.5<br>(9.2–20.0)         | 0.9<br>(0.0–2.0)          | 0.1<br>(0.0–0.3)         | 10.6<br>(3.7–19.5)           | 10.6<br>(3.7–19.5)           | 1.8<br>(<0.1–15.2)           | 1.8<br>(<0.1–15.2)           |
| Saudi Arabia                                  | 28.5<br>(22.1–35.7)         | 3.4<br>(2.0–5.3)         | <0.1<br>(<0.1–0.1)         | 0.1<br>(<0.1–0.2)           | 27.0<br>(18.4–37.3)         | 27.0<br>(18.4–37.3)         | 4.2<br>(1.7–6.7)           | 4.2<br>(1.7–6.7)           | 11.2<br>(7.1–15.8)        | 16.8<br>(11.3–22.7)        | 0.4<br>(0.0–1.3)          | <0.1<br>(0.0–0.2)        | 9.7<br>(5.9–14.1)            | 9.7<br>(5.9–14.1)            | 2.4<br>(<0.1–8.8)            | 2.4<br>(<0.1–8.8)            |
| Sudan                                         | 32.6<br>(24.9–40.3)         | 4.7<br>(2.9–7.2)         | 11.6<br>(5.6–20.4)         | 16.2<br>(9.1–25.7)          | 20.9<br>(12.0–31.6)         | 19.2<br>(11.2–29.1)         | 17.7<br>(7.9–26.7)         | 17.7<br>(7.9–26.7)         | 11.6<br>(7.7–16.2)        | 13.7<br>(9.0–18.7)         | <0.1<br>(0.0–0.1)         | <0.1<br>(0.0–<0.1)       | 8.3<br>(3.6–15.7)            | 8.3<br>(3.6–15.7)            | 1.5<br>(<0.1–7.2)            | 1.5<br>(<0.1–7.2)            |
| Syrian Arab Republic                          | 40.5<br>(32.3–48.0)         | 8.3<br>(5.1–12.5)        | <0.1<br>(<0.1–<0.1)        | <0.1<br>(<0.1–0.1)          | 15.8<br>(9.6–23.6)          | 15.8<br>(9.6–23.6)          | 4.9<br>(2.0–7.9)           | 4.9<br>(2.0–7.9)           | 10.2<br>(6.4–14.7)        | 14.1<br>(9.0–20.0)         | 1.4<br>(0.5–2.3)          | 0.1<br>(<0.1–0.2)        | 4.4<br>(2.5–6.3)             | 4.4<br>(2.5–6.3)             | 7.7<br>(2.5–12.6)            | 7.7<br>(2.5–12.6)            |
| Tunisia                                       | 41.1<br>(33.2–48.7)         | 4.7<br>(2.8–7.2)         | <0.1<br>(<0.1–0.1)         | 0.1<br>(<0.1–0.1)           | 15.5<br>(8.9–24.1)          | 15.5<br>(8.9–24.1)          | 5.7<br>(2.4–9.2)           | 5.7<br>(2.4–9.2)           | 11.0<br>(6.7–15.6)        | 16.0<br>(10.1–22.0)        | 2.6<br>(1.0–4.4)          | 0.4<br>(0.0–0.9)         | 4.5<br>(2.3–6.7)             | 4.5<br>(2.3–6.7)             | 5.1<br>(<0.1–11.3)           | 5.1<br>(<0.1–11.3)           |
| Turkey                                        | 42.0<br>(34.1–49.2)         | 16.6<br>(12.1–21.7)      | 0.1<br>(<0.1–0.2)          | 0.1<br>(<0.1–0.2)           | 13.5<br>(8.4–20.4)          | 13.5<br>(8.4–20.3)          | 5.8<br>(2.4–9.3)           | 5.8<br>(2.4–9.3)           | 8.9<br>(5.4–12.9)         | 13.2<br>(8.2–18.6)         | 2.6<br>(1.0–4.1)          | 0.8<br>(0.1–1.7)         | 0.4<br>(0.1–0.7)             | 0.4<br>(0.1–0.7)             | 18.3<br>(13.7–23.4)          | 18.3<br>(13.7–23.4)          |
| United Arab Emirates                          | 24.6<br>(18.1–31.2)         | 7.0<br>(4.2–10.8)        | <0.1<br>(<0.1–<0.1)        | <0.1<br>(<0.1–<0.1)         | 21.1<br>(13.2–30.8)         | 21.1<br>(13.2–30.8)         | 3.8<br>(1.5–6.2)           | 3.8<br>(1.5–6.2)           | 13.2<br>(8.3–19.0)        | 16.5<br>(10.5–22.5)        | 1.6<br>(0.0–3.8)          | 0.2<br>(0.0–0.8)         | 8.4<br>(<0.1–25.0)           | 8.4<br>(<0.1–25.0)           | 1.9<br>(<0.1–18.2)           | 1.9<br>(<0.1–18.2)           |
| Yemen                                         | 39.5<br>(32.3–46.8)         | 13.8<br>(9.6–18.5)       | 12.1<br>(5.8–21.8)         | 16.3<br>(8.8–25.7)          | 17.3<br>(9.2–27.6)          | 15.5<br>(7.9–24.7)          | 13.5<br>(5.8–20.7)         | 13.5<br>(5.8–20.7)         | 11.3<br>(7.0–15.8)        | 14.5<br>(9.1–19.8)         | 1.0<br>(0.3–1.8)          | 0.1<br>(<0.1–0.3)        | 5.5<br>(1.6–12.3)            | 5.5<br>(1.6–12.3)            | 0.9<br>(<0.1–5.1)            | 0.9<br>(<0.1–5.1)            |
| <b>South Asia</b>                             | <b>27.7<br/>(20.6–34.4)</b> | <b>5.1<br/>(3.3–7.4)</b> | <b>15.7<br/>(8.9–24.8)</b> | <b>20.6<br/>(13.3–29.5)</b> | <b>24.9<br/>(18.3–31.3)</b> | <b>23.0<br/>(17.0–29.2)</b> | <b>12.2<br/>(5.2–18.8)</b> | <b>12.2<br/>(5.3–18.9)</b> | <b>5.9<br/>(3.1–8.9)</b>  | <b>9.4<br/>(5.1–14.0)</b>  | <b>5.4<br/>(2.4–8.2)</b>  | <b>0.4<br/>(0.1–0.9)</b> | <b>7.2<br/>(4.0–11.5)</b>    | <b>7.1<br/>(4.0–11.2)</b>    | <b>2.4<br/>(&lt;0.1–7.1)</b> | <b>2.2<br/>(&lt;0.1–6.7)</b> |
| Bangladesh                                    | 33.7<br>(24.5–42.7)         | 2.5<br>(1.3–4.2)         | 21.5<br>(11.9–33.7)        | 28.4<br>(18.0–40.0)         | 20.0<br>(13.8–26.5)         | 17.3<br>(11.5–23.3)         | 18.1<br>(8.1–27.1)         | 18.1<br>(8.1–27.1)         | 5.1<br>(2.4–8.3)          | 9.5<br>(4.6–14.7)          | 0.7<br>(0.0–1.5)          | 0.1<br>(0.0–0.3)         | 5.9<br>(2.7–9.8)             | 5.9<br>(2.7–9.8)             | 1.3<br>(<0.1–4.8)            | 1.3<br>(<0.1–4.8)            |
| Bhutan                                        | 16.3<br>(11.3–21.7)         | 6.1<br>(3.6–9.4)         | 16.3<br>(8.1–27.9)         | 21.6<br>(12.9–32.9)         | 15.2<br>(10.1–21.3)         | 13.3<br>(8.4–19.1)          | 6.1<br>(2.5–9.8)           | 6.1<br>(2.5–9.8)           | 5.3<br>(2.8–8.1)          | 4.9<br>(2.6–7.3)           | 1.9<br>(0.0–4.7)          | 0.1<br>(0.0–0.4)         | <0.1<br>(<0.1–0.1)           | <0.1<br>(<0.1–0.1)           | 18.6<br>(11.8–26.9)          | 18.6<br>(11.8–26.9)          |
| India                                         | 27.0<br>(20.0–33.6)         | 4.9<br>(3.2–7.4)         | 15.0<br>(8.4–23.7)         | 19.9<br>(12.8–28.6)         | 25.7<br>(19.1–32.2)         | 23.6<br>(17.4–29.8)         | 11.7<br>(5.0–18.0)         | 11.9<br>(5.2–18.4)         | 5.9<br>(3.1–9.0)          | 9.4<br>(5.2–14.0)          | 6.2<br>(2.8–9.5)          | 0.5<br>(0.1–1.0)         | 7.2<br>(3.9–11.6)            | 7.2<br>(4.0–11.7)            | 2.1<br>(<0.1–6.7)            | 2.0<br>(<0.1–6.5)            |
| Nepal                                         | 28.5<br>(19.2–37.7)         | 18.4<br>(11.4–25.8)      | 22.4<br>(12.6–35.1)        | 28.9<br>(18.4–40.2)         | 22.8<br>(15.0–31.2)         | 19.4<br>(12.0–27.6)         | 11.3<br>(4.9–17.8)         | 11.3<br>(4.9–17.8)         | 4.9<br>(2.2–8.4)          | 5.1<br>(2.2–8.5)           | 4.7<br>(0.2–9.9)          | 0.7<br>(0.0–1.9)         | 1.4<br>(0.7–2.2)             | 1.4<br>(0.7–2.2)             | 13.0<br>(7.6–19.0)           | 13.0<br>(7.6–19.0)           |
| Pakistan                                      | 30.2<br>(23.2–37.2)         | 6.8<br>(4.0–10.2)        | 17.2<br>(9.3–26.9)         | 22.7<br>(13.9–32.4)         | 21.0<br>(14.3–28.5)         | 18.5<br>(12.6–25.4)         | 12.3<br>(5.2–19.1)         | 12.3<br>(5.2–19.2)         | 6.4<br>(3.4–10.0)         | 9.5<br>(5.1–14.1)          | 1.5<br>(0.5–2.6)          | 0.1<br>(<0.1–0.2)        | 9.2<br>(5.5–16.4)            | 9.2<br>(5.4–15.8)            | 4.8<br>(<0.1–12.6)           | 4.9<br>(<0.1–12.8)           |
| <b>Southeast Asia, East Asia, and Oceania</b> | <b>41.1<br/>(33.2–48.5)</b> | <b>6.1<br/>(3.8–8.5)</b> | <b>7.9<br/>(3.7–13.5)</b>  | <b>11.4<br/>(6.3–17.3)</b>  | <b>13.5<br/>(9.1–18.6)</b>  | <b>12.6<br/>(8.7–17.3)</b>  | <b>5.8<br/>(2.4–9.2)</b>   | <b>5.8<br/>(2.4–9.4)</b>   | <b>7.3<br/>(4.4–10.5)</b> | <b>14.4<br/>(8.7–20.0)</b> | <b>9.9<br/>(5.1–14.1)</b> | <b>1.2<br/>(0.3–2.1)</b> | <b>1.4<br/>(&lt;0.1–5.8)</b> | <b>1.4<br/>(&lt;0.1–6.4)</b> | <b>4.6<br/>(2.5–6.8)</b>     | <b>4.4<br/>(2.2–6.7)</b>     |
| East Asia                                     | 47.3<br>(40.0–54.4)         | 5.5<br>(3.8–7.6)         | 5.2<br>(2.2–9.5)           | 8.1<br>(4.1–14.1)           | 19.6<br>(13.5–26.5)         | 19.0<br>(13.3–25.3)         | 3.8<br>(1.5–6.1)           | 3.8<br>(1.5–6.2)           | 9.1<br>(5.8–13.1)         | 18.6<br>(12.3–25.2)        | 12.3<br>(6.4–17.4)        | 1.2<br>(0.3–2.2)         | 0.7<br>(0.1–1.2)             | 0.6<br>(0.1–1.2)             | 12.2<br>(7.5–16.4)           | 12.8<br>(7.6–17.3)           |



|                                       | Smoking             |                     | Household air pollution |                     | Ambient particulate matter |                     | Handwashing        |                    | Secondhand smoke   |                     | Alcohol use        |                   | High temperature   |                    | Low temperature     |                     |
|---------------------------------------|---------------------|---------------------|-------------------------|---------------------|----------------------------|---------------------|--------------------|--------------------|--------------------|---------------------|--------------------|-------------------|--------------------|--------------------|---------------------|---------------------|
|                                       | M                   | F                   | M                       | F                   | M                          | F                   | M                  | F                  | M                  | F                   | M                  | F                 | M                  | F                  | M                   | F                   |
| China                                 | 47.8<br>(40.4–55.0) | 5.5<br>(3.7–7.6)    | 4.9<br>(2.0–9.1)        | 7.4<br>(3.5–13.2)   | 20.4<br>(14.0–27.3)        | 19.7<br>(13.8–26.3) | 4.0<br>(1.6–6.5)   | 4.0<br>(1.6–6.5)   | 9.3<br>(5.8–13.3)  | 18.9<br>(12.6–25.6) | 12.7<br>(6.5–17.8) | 1.3<br>(0.3–2.4)  | 0.7<br>(0.1–1.2)   | 0.6<br>(0.1–1.2)   | 12.6<br>(7.6–16.9)  | 12.9<br>(7.6–17.6)  |
| Democratic People's Republic of Korea | 45.9<br>(38.1–53.5) | 6.6<br>(3.8–10.7)   | 19.5<br>(10.2–31.3)     | 26.2<br>(16.0–38.1) | 16.4<br>(10.4–22.7)        | 14.4<br>(9.2–20.5)  | 2.3<br>(0.9–3.7)   | 2.3<br>(0.9–3.7)   | 7.7<br>(4.6–11.5)  | 17.4<br>(11.0–23.8) | 9.2<br>(3.9–14.4)  | 0.6<br>(0.0–1.4)  | 0.1<br>(<0.1–0.7)  | 0.1<br>(<0.1–0.7)  | 19.3<br>(11.7–29.7) | 19.3<br>(11.7–29.7) |
| Taiwan (Province of China)            | 41.8<br>(34.0–49.4) | 4.8<br>(2.8–7.2)    | 0.4<br>(0.1–1.2)        | 0.7<br>(0.1–1.8)    | 12.1<br>(7.5–17.9)         | 12.1<br>(7.5–17.9)  | 1.8<br>(0.7–3.0)   | 1.8<br>(0.7–3.0)   | 8.4<br>(5.0–12.1)  | 14.0<br>(8.7–19.6)  | 10.3<br>(4.9–15.3) | 0.7<br>(<0.1–1.6) | 0.9<br>(0.2–2.3)   | 0.9<br>(0.2–2.3)   | 3.5<br>(<0.1–6.8)   | 3.5<br>(<0.1–6.8)   |
| Oceania                               | 30.4<br>(20.9–39.1) | 15.7<br>(9.7–21.9)  | 32.0<br>(19.1–45.0)     | 38.6<br>(27.1–49.3) | 4.6<br>(1.4–11.0)          | 3.8<br>(1.2–9.0)    | 9.2<br>(3.9–14.6)  | 9.3<br>(4.0–15.0)  | 7.4<br>(3.6–12.0)  | 10.6<br>(5.2–16.6)  | 1.9<br>(0.0–4.9)   | 0.1<br>(0.0–0.4)  | 0.5<br>(<0.1–2.2)  | 0.5<br>(<0.1–2.2)  | 1.0<br>(<0.1–2.4)   | 1.0<br>(<0.1–2.3)   |
| Fiji                                  | 30.9<br>(20.7–40.7) | 10.1<br>(5.4–15.7)  | 4.2<br>(1.2–9.4)        | 6.4<br>(2.2–13.1)   | 5.4<br>(1.4–13.3)          | 5.4<br>(1.5–13.1)   | 2.9<br>(1.2–4.8)   | 2.9<br>(1.2–4.8)   | 5.6<br>(2.6–9.7)   | 8.3<br>(3.8–13.5)   | 5.6<br>(2.2–9.1)   | 0.3<br>(0.0–0.7)  | 0.5<br>(<0.1–2.4)  | 0.5<br>(<0.1–2.4)  | <0.1<br>(<0.1–1.7)  | <0.1<br>(<0.1–1.7)  |
| Kiribati                              | 47.8<br>(39.3–55.9) | 31.5<br>(21.7–40.7) | 24.1<br>(12.5–37.1)     | 31.0<br>(19.8–43.3) | 3.8<br>(1.3–8.6)           | 3.2<br>(1.1–7.3)    | 6.5<br>(2.7–10.4)  | 6.5<br>(2.7–10.4)  | 9.8<br>(5.1–14.7)  | 13.1<br>(7.2–19.4)  | 1.6<br>(0.0–5.1)   | <0.1<br>(0.0–0.1) | 0.9<br>(<0.1–5.0)  | 0.9<br>(<0.1–5.0)  | <0.1<br>(<0.1–0.1)  | <0.1<br>(<0.1–0.1)  |
| Marshall Islands                      | 28.4<br>(20.3–36.5) | 8.5<br>(4.9–12.6)   | 7.5<br>(3.0–14.4)       | 10.9<br>(5.1–18.9)  | 4.4<br>(1.6–9.2)           | 4.2<br>(1.6–8.7)    | 4.5<br>(1.8–7.3)   | 4.5<br>(1.8–7.3)   | 7.3<br>(3.7–11.3)  | 11.2<br>(6.1–16.8)  | 3.4<br>(0.0–9.1)   | 0.1<br>(0.0–0.7)  | 0.2<br>(<0.1–11.3) | 0.2<br>(<0.1–11.3) | <0.1<br>(<0.1–0.1)  | <0.1<br>(<0.1–0.1)  |
| Micronesia (Federated States of)      | 37.4<br>(26.6–47.3) | 23.7<br>(14.6–33.7) | 6.6<br>(2.4–13.4)       | 9.8<br>(4.1–18.1)   | 5.1<br>(1.5–12.2)          | 4.9<br>(1.5–11.4)   | 3.9<br>(1.6–6.4)   | 3.9<br>(1.6–6.4)   | 6.3<br>(2.7–10.8)  | 9.0<br>(4.1–14.8)   | 3.3<br>(0.7–6.1)   | <0.1<br>(0.0–0.2) | 0.2<br>(<0.1–11.3) | 0.2<br>(<0.1–11.3) | <0.1<br>(<0.1–0.2)  | <0.1<br>(<0.1–0.2)  |
| Nauru                                 | 30.8<br>(21.2–40.0) | 29.9<br>(20.1–39.9) | 0.5<br>(0.1–1.5)        | 0.9<br>(0.2–2.2)    | 1.9<br>(0.4–5.1)           | 2.0<br>(0.6–5.2)    | 3.1<br>(1.2–5.1)   | 3.1<br>(1.2–5.1)   | 6.8<br>(3.0–11.5)  | 9.6<br>(4.3–15.6)   | 8.9<br>(3.0–14.4)  | 0.3<br>(0.0–1.2)  | 2.4<br>(<0.1–31.1) | 2.4<br>(<0.1–31.1) | <0.1<br>(<0.1–0.3)  | <0.1<br>(<0.1–0.3)  |
| Palau                                 | 28.6<br>(20.3–37.4) | 10.2<br>(5.7–15.7)  | <0.1<br>(<0.1–<0.1)     | <0.1<br>(<0.1–<0.1) | 2.0<br>(<0.1–5.9)          | 2.0<br>(<0.1–5.9)   | 2.4<br>(0.9–3.9)   | 2.4<br>(0.9–3.9)   | 9.5<br>(5.0–14.5)  | 13.2<br>(7.4–19.5)  | 3.6<br>(0.0–9.7)   | 0.1<br>(0.0–0.6)  | 0.9<br>(<0.1–28.7) | 0.9<br>(<0.1–28.7) | <0.1<br>(<0.1–0.4)  | <0.1<br>(<0.1–0.4)  |
| Papua New Guinea                      | 27.7<br>(18.1–37.1) | 16.7<br>(9.7–23.6)  | 37.9<br>(22.7–52.8)     | 44.8<br>(31.5–56.7) | 4.7<br>(1.3–12.1)          | 3.7<br>(1.0–9.9)    | 12.2<br>(5.2–19.0) | 12.2<br>(5.2–19.0) | 7.5<br>(3.5–12.3)  | 10.5<br>(4.9–16.5)  | 1.4<br>(0.0–4.8)   | 0.1<br>(0.0–0.4)  | 0.4<br>(<0.1–1.9)  | 0.4<br>(<0.1–1.9)  | 1.6<br>(<0.1–3.7)   | 1.6<br>(<0.1–3.7)   |
| Samoa                                 | 42.2<br>(34.1–49.8) | 17.4<br>(12.0–23.8) | 14.8<br>(6.6–26.4)      | 20.6<br>(11.2–32.3) | 5.2<br>(1.4–12.2)          | 4.7<br>(1.3–10.9)   | 2.2<br>(0.9–3.6)   | 2.2<br>(0.9–3.6)   | 11.4<br>(6.5–16.4) | 15.9<br>(9.8–22.3)  | 4.5<br>(0.0–9.5)   | 0.1<br>(0.0–0.8)  | 0.4<br>(<0.1–2.2)  | 0.4<br>(<0.1–2.2)  | 0.1<br>(<0.1–1.4)   | 0.1<br>(<0.1–1.4)   |
| Solomon Islands                       | 37.0<br>(28.0–46.2) | 15.1<br>(9.6–21.5)  | 38.1<br>(23.2–53.1)     | 45.4<br>(31.8–57.7) | 3.9<br>(1.2–9.2)           | 3.1<br>(0.9–7.2)    | 4.9<br>(2.0–7.9)   | 4.9<br>(2.0–7.9)   | 7.7<br>(3.8–12.0)  | 11.4<br>(6.0–17.4)  | 1.2<br>(0.0–4.2)   | 0.1<br>(0.0–0.3)  | 0.5<br>(<0.1–3.3)  | 0.5<br>(<0.1–3.3)  | <0.1<br>(<0.1–0.5)  | <0.1<br>(<0.1–0.5)  |
| Tonga                                 | 37.4<br>(29.0–45.7) | 10.2<br>(5.9–14.9)  | 6.7<br>(2.3–13.4)       | 9.9<br>(4.0–18.4)   | 5.3<br>(1.5–12.4)          | 5.1<br>(1.6–11.6)   | 3.3<br>(1.3–5.4)   | 3.3<br>(1.3–5.4)   | 8.5<br>(4.6–12.8)  | 12.7<br>(7.2–18.8)  | 1.8<br>(0.0–5.8)   | 0.1<br>(0.0–0.4)  | 1.2<br>(<0.1–3.0)  | 1.2<br>(<0.1–3.0)  | 0.2<br>(<0.1–2.6)   | 0.2<br>(<0.1–2.6)   |
| Tuvalu                                | 34.0<br>(23.7–43.2) | 17.2<br>(10.5–25.4) | 1.6<br>(0.4–4.1)        | 2.6<br>(0.8–5.6)    | 2.4<br>(0.8–5.6)           | 2.5<br>(1.0–5.6)    | 3.7<br>(1.5–6.1)   | 3.7<br>(1.5–6.1)   | 8.0<br>(3.9–12.8)  | 11.1<br>(5.7–17.3)  | 2.5<br>(0.0–6.3)   | 0.1<br>(0.0–0.4)  | 1.4<br>(<0.1–12.8) | 1.4<br>(<0.1–12.8) | 0.1<br>(<0.1–0.7)   | 0.1<br>(<0.1–0.7)   |
| Vanuatu                               | 24.9<br>(16.1–33.5) | 3.0<br>(1.5–5.0)    | 28.4<br>(15.5–42.8)     | 36.3<br>(23.3–49.6) | 4.9<br>(1.5–10.9)          | 4.1<br>(1.2–9.2)    | 10.0<br>(4.3–15.7) | 10.0<br>(4.3–15.7) | 5.0<br>(2.0–8.7)   | 8.0<br>(3.6–13.7)   | 2.5<br>(0.4–5.0)   | <0.1<br>(0.0–0.2) | 0.4<br>(<0.1–2.1)  | 0.4<br>(<0.1–2.1)  | <0.1<br>(<0.1–1.8)  | <0.1<br>(<0.1–1.8)  |
| Southeast Asia                        | 37.6<br>(29.2–45.7) | 6.2<br>(3.6–8.9)    | 9.1<br>(4.3–15.7)       | 12.5<br>(7.0–19.2)  | 10.0<br>(6.5–14.4)         | 9.5<br>(6.3–13.5)   | 7.0<br>(2.9–11.1)  | 6.8<br>(2.8–11.0)  | 6.2<br>(3.4–9.3)   | 12.3<br>(7.1–17.7)  | 8.6<br>(4.2–12.4)  | 1.2<br>(0.2–2.2)  | 1.9<br>(<0.1–8.9)  | 1.9<br>(<0.1–9.3)  | 0.1<br>(<0.1–1.3)   | <0.1<br>(<0.1–1.2)  |
| Cambodia                              | 45.5<br>(36.9–53.6) | 6.9<br>(4.1–10.3)   | 26.8<br>(14.9–40.5)     | 34.3<br>(22.1–47.2) | 8.1<br>(4.5–13.0)          | 6.8<br>(3.9–10.9)   | 8.6<br>(3.5–13.5)  | 8.6<br>(3.5–13.5)  | 5.5<br>(3.3–8.0)   | 15.7<br>(9.8–21.6)  | 12.7<br>(5.8–19.1) | 1.6<br>(0.0–3.4)  | 2.7<br>(<0.1–21.8) | 2.7<br>(<0.1–21.8) | <0.1<br>(<0.1–0.3)  | <0.1<br>(<0.1–0.3)  |

|                                  | Smoking                           |                                | Household air pollution           |                                   | Ambient particulate matter       |                                 | Handwashing                      |                                  | Secondhand smoke               |                                | Alcohol use                     |                                | High temperature               |                                 | Low temperature                    |                                    |
|----------------------------------|-----------------------------------|--------------------------------|-----------------------------------|-----------------------------------|----------------------------------|---------------------------------|----------------------------------|----------------------------------|--------------------------------|--------------------------------|---------------------------------|--------------------------------|--------------------------------|---------------------------------|------------------------------------|------------------------------------|
|                                  | M                                 | F                              | M                                 | F                                 | M                                | F                               | M                                | F                                | M                              | F                              | M                               | F                              | M                              | F                               | M                                  | F                                  |
| Indonesia                        | 40.1<br>(29.8–49.3)               | 3.9<br>(2.2–6.2)               | 5.9<br>(2.3–11.5)                 | 9.2<br>(4.2–16.3)                 | 9.5<br>(6.0–14.3)                | 9.0<br>(5.8–13.3)               | 7.3<br>(3.0–11.5)                | 7.4<br>(3.0–11.7)                | 5.5<br>(2.9–8.2)               | 14.0<br>(7.9–20.3)             | 0.3<br>(0.0–1.5)                | <0.1<br>(0.0–0.1)              | 0.3<br>(<0.1–3.4)              | 0.3<br>(<0.1–3.6)               | <0.1<br>(<0.1–0.9)                 | <0.1<br>(<0.1–0.9)                 |
| Lao People's Democratic Republic | 39.2<br>(29.1–48.2)               | 6.2<br>(3.3–10.0)              | 28.9<br>(16.1–43.2)               | 36.9<br>(23.8–50.3)               | 7.5<br>(4.3–11.6)                | 6.3<br>(3.6–9.6)                | 10.2<br>(4.3–15.9)               | 10.2<br>(4.3–15.9)               | 5.6<br>(2.9–8.4)               | 13.3<br>(7.5–19.3)             | 8.0<br>(1.7–14.3)               | 2.0<br>(0.0–4.7)               | 1.8<br>(0.6–3.9)               | 1.8<br>(0.6–3.9)                | <0.1<br>(<0.1–2.9)                 | <0.1<br>(<0.1–2.9)                 |
| Malaysia                         | 35.1<br>(27.0–42.6)               | 3.4<br>(1.8–5.4)               | 0.1<br>(<0.1–0.2)                 | 0.1<br>(<0.1–0.3)                 | 8.3<br>(4.7–13.2)                | 8.3<br>(4.7–13.2)               | 2.0<br>(0.8–3.2)                 | 2.0<br>(0.8–3.2)                 | 7.2<br>(3.8–10.7)              | 13.4<br>(7.7–19.3)             | 3.2<br>(0.7–6.0)                | 0.3<br>(0.0–0.8)               | 0.8<br>(<0.1–3.9)              | 0.8<br>(<0.1–3.9)               | <0.1<br>(<0.1–0.8)                 | <0.1<br>(<0.1–0.8)                 |
| Maldives                         | 35.5<br>(27.8–43.1)               | 6.6<br>(3.7–10.0)              | 2.1<br>(0.7–5.0)                  | 3.2<br>(1.2–7.0)                  | 5.2<br>(2.9–8.8)                 | 5.2<br>(3.0–8.4)                | 8.1<br>(3.5–13.0)                | 8.1<br>(3.5–13.0)                | 8.7<br>(5.0–13.2)              | 14.8<br>(8.8–21.3)             | 1.2<br>(0.0–4.9)                | 0.1<br>(0.0–0.4)               | 0.4<br>(<0.1–11.4)             | 0.4<br>(<0.1–11.4)              | <0.1<br>(<0.1–0.1)                 | <0.1<br>(<0.1–0.1)                 |
| Mauritius                        | 29.7<br>(21.2–38.4)               | 4.0<br>(2.2–6.5)               | 0.1<br>(<0.1–0.4)                 | 0.2<br>(0.1–0.5)                  | 7.3<br>(3.0–13.8)                | 7.3<br>(3.1–13.7)               | 1.1<br>(0.4–1.8)                 | 1.1<br>(0.4–1.8)                 | 6.4<br>(3.4–9.8)               | 12.4<br>(7.1–18.2)             | 8.1<br>(2.5–14.2)               | 0.4<br>(0.0–1.8)               | 0.7<br>(<0.1–3.5)              | 0.7<br>(<0.1–3.5)               | <0.1<br>(<0.1–5.4)                 | <0.1<br>(<0.1–5.4)                 |
| Myanmar                          | 30.1<br>(20.0–39.9)               | 10.4<br>(5.3–15.8)             | 20.0<br>(10.1–31.9)               | 26.8<br>(16.1–39.0)               | 11.8<br>(7.9–16.1)               | 10.4<br>(7.0–14.1)              | 11.1<br>(4.7–17.5)               | 11.1<br>(4.7–17.5)               | 4.7<br>(2.0–8.1)               | 7.6<br>(3.5–12.6)              | 6.8<br>(2.4–11.2)               | 0.3<br>(0.0–1.0)               | 2.9<br>(1.3–5.3)               | 2.9<br>(1.3–5.3)                | 1.9<br>(<0.1–4.3)                  | 1.9<br>(<0.1–4.3)                  |
| Philippines                      | 39.5<br>(31.3–47.4)               | 10.3<br>(6.6–14.5)             | 12.3<br>(5.6–21.3)                | 16.2<br>(8.6–25.3)                | 8.8<br>(5.7–12.5)                | 8.5<br>(5.6–12.0)               | 6.4<br>(2.6–10.1)                | 6.3<br>(2.6–10.0)                | 8.2<br>(4.4–11.9)              | 12.3<br>(7.1–17.7)             | 11.3<br>(5.2–16.7)              | 2.9<br>(0.8–5.1)               | 2.4<br>(<0.1–23.4)             | 2.4<br>(<0.1–24.0)              | 0.2<br>(<0.1–0.7)                  | 0.2<br>(<0.1–0.7)                  |
| Seychelles                       | 34.7<br>(27.4–42.4)               | 6.2<br>(3.6–9.5)               | 0.1<br>(<0.1–0.2)                 | 0.1<br>(<0.1–0.2)                 | 7.7<br>(3.3–14.3)                | 7.7<br>(3.3–14.3)               | 3.9<br>(1.6–6.3)                 | 3.9<br>(1.6–6.3)                 | 6.5<br>(3.5–9.7)               | 11.4<br>(6.4–16.4)             | 12.8<br>(5.7–19.4)              | 1.3<br>(0.0–2.9)               | 1.0<br>(<0.1–3.8)              | 1.0<br>(<0.1–3.8)               | 0.2<br>(<0.1–1.3)                  | 0.2<br>(<0.1–1.3)                  |
| Sri Lanka                        | 24.0<br>(14.7–33.3)               | 2.1<br>(1.2–3.5)               | 7.6<br>(2.7–15.6)                 | 11.1<br>(4.6–21.3)                | 10.0<br>(5.8–15.6)               | 9.6<br>(5.7–14.8)               | 5.0<br>(2.0–8.1)                 | 5.0<br>(2.0–8.1)                 | 3.6<br>(1.5–6.4)               | 6.5<br>(2.7–11.3)              | 11.6<br>(6.2–16.7)              | 1.1<br>(0.3–2.1)               | 1.2<br>(<0.1–13.3)             | 1.2<br>(<0.1–13.3)              | <0.1<br>(<0.1–0.8)                 | <0.1<br>(<0.1–0.8)                 |
| Thailand                         | 34.2<br>(25.2–42.7)               | 4.0<br>(2.3–6.2)               | 2.7<br>(0.9–5.8)                  | 4.0<br>(1.5–8.2)                  | 13.8<br>(8.8–20.0)               | 13.6<br>(8.8–19.6)              | 7.5<br>(3.1–12.1)                | 7.5<br>(3.1–12.1)                | 4.7<br>(2.5–7.2)               | 9.6<br>(5.2–14.2)              | 14.5<br>(8.0–20.3)              | 1.6<br>(0.2–3.2)               | 2.9<br>(<0.1–10.6)             | 2.9<br>(<0.1–10.6)              | <0.1<br>(<0.1–1.0)                 | <0.1<br>(<0.1–1.0)                 |
| Timor-Leste                      | 38.5<br>(27.3–48.3)               | 4.3<br>(1.9–7.4)               | 25.3<br>(13.2–39.3)               | 32.9<br>(20.8–46.6)               | 6.2<br>(3.0–11.2)                | 5.3<br>(2.5–9.6)                | 6.6<br>(2.7–10.6)                | 6.6<br>(2.7–10.6)                | 4.9<br>(2.2–8.3)               | 9.6<br>(4.6–15.2)              | 6.7<br>(2.0–11.8)               | 0.4<br>(0.0–1.1)               | 0.5<br>(<0.1–2.1)              | 0.5<br>(<0.1–2.1)               | <0.1<br>(<0.1–1.7)                 | <0.1<br>(<0.1–1.7)                 |
| Viet Nam                         | 42.3<br>(33.8–50.0)               | 3.8<br>(2.1–5.8)               | 7.6<br>(3.0–14.6)                 | 11.1<br>(5.2–19.5)                | 10.0<br>(6.4–14.7)               | 9.6<br>(6.3–13.8)               | 8.6<br>(3.6–13.6)                | 8.6<br>(3.6–13.6)                | 6.7<br>(3.9–9.9)               | 16.4<br>(9.8–22.8)             | 15.4<br>(7.7–22.6)              | 0.9<br>(0.0–2.1)               | 2.7<br>(0.9–5.9)               | 2.7<br>(0.9–5.9)                | 0.2<br>(<0.1–3.2)                  | 0.2<br>(<0.1–3.2)                  |
| <b>Sub-Saharan Africa</b>        | <b>18.1</b><br><b>(12.2–24.1)</b> | <b>3.5</b><br><b>(2.0–5.2)</b> | <b>30.8</b><br><b>(20.0–41.1)</b> | <b>36.9</b><br><b>(26.8–46.9)</b> | <b>11.4</b><br><b>(7.3–16.3)</b> | <b>9.7</b><br><b>(6.2–14.1)</b> | <b>21.5</b><br><b>(9.8–31.7)</b> | <b>21.6</b><br><b>(9.9–31.9)</b> | <b>3.3</b><br><b>(1.6–5.5)</b> | <b>4.3</b><br><b>(2.0–6.8)</b> | <b>7.5</b><br><b>(3.5–11.0)</b> | <b>2.2</b><br><b>(0.5–4.1)</b> | <b>3.0</b><br><b>(0.5–9.4)</b> | <b>3.2</b><br><b>(0.6–10.5)</b> | <b>1.6</b><br><b>(&lt;0.1–3.4)</b> | <b>1.4</b><br><b>(&lt;0.1–3.3)</b> |
| Central Sub-Saharan Africa       | 17.0<br>(10.6–23.4)               | 2.1<br>(1.1–3.4)               | 32.9<br>(20.6–44.9)               | 39.7<br>(27.7–50.5)               | 10.1<br>(5.2–17.1)               | 8.1<br>(3.9–14.1)               | 22.6<br>(10.4–33.2)              | 22.6<br>(10.5–33.3)              | 2.2<br>(0.9–3.9)               | 2.6<br>(1.1–4.5)               | 4.4<br>(0.4–8.4)                | 1.7<br>(0.0–4.0)               | 1.5<br>(0.3–3.5)               | 1.5<br>(0.3–3.4)                | <0.1<br>(<0.1–2.4)                 | <0.1<br>(<0.1–2.4)                 |
| Angola                           | 23.6<br>(17.0–30.4)               | 4.2<br>(2.2–6.9)               | 14.7<br>(7.3–24.7)                | 19.8<br>(11.5–30.0)               | 11.8<br>(6.2–19.1)               | 10.5<br>(5.5–17.2)              | 22.3<br>(10.2–32.8)              | 22.3<br>(10.2–32.8)              | 4.1<br>(2.2–6.3)               | 6.4<br>(3.4–9.6)               | 11.3<br>(5.5–16.7)              | 5.2<br>(1.6–8.8)               | 1.7<br>(0.5–3.8)               | 1.7<br>(0.5–3.8)                | <0.1<br>(<0.1–2.9)                 | <0.1<br>(<0.1–2.9)                 |
| Central African Republic         | 16.2<br>(10.3–22.4)               | 2.1<br>(1.0–3.5)               | 46.8<br>(31.2–58.9)               | 51.4<br>(39.6–63.8)               | 7.9<br>(2.5–17.1)                | 5.7<br>(1.8–12.6)               | 21.6<br>(9.9–31.8)               | 21.6<br>(9.9–31.8)               | 2.9<br>(1.3–4.9)               | 3.6<br>(1.6–5.9)               | 3.2<br>(0.0–8.1)                | 1.2<br>(0.0–3.7)               | 3.8<br>(1.5–7.0)               | 3.8<br>(1.5–7.0)                | <0.1<br>(<0.1–1.2)                 | <0.1<br>(<0.1–1.2)                 |
| Congo                            | 17.3<br>(11.1–23.6)               | 2.1<br>(0.9–3.6)               | 11.8<br>(5.4–21.2)                | 16.5<br>(9.1–26.5)                | 16.5<br>(9.0–27.7)               | 15.3<br>(8.2–25.8)              | 21.0<br>(9.5–31.0)               | 21.0<br>(9.5–31.0)               | 3.3<br>(1.5–5.5)               | 4.3<br>(2.0–7.0)               | 6.4<br>(0.6–12.2)               | 3.0<br>(0.0–7.2)               | 0.9<br>(<0.1–3.0)              | 0.9<br>(<0.1–3.0)               | <0.1<br>(<0.1–1.9)                 | <0.1<br>(<0.1–1.9)                 |
| Democratic Republic of the Congo | 15.3<br>(8.6–22.2)                | 1.7<br>(0.8–3.0)               | 38.4<br>(23.9–52.2)               | 45.2<br>(32.1–56.6)               | 9.2<br>(4.4–16.5)                | 7.1<br>(3.0–13.1)               | 23.0<br>(10.6–33.7)              | 23.0<br>(10.6–33.7)              | 1.5<br>(0.4–3.2)               | 1.6<br>(0.5–3.2)               | 2.4<br>(0.0–6.7)                | 0.9<br>(0.0–3.0)               | 1.3<br>(0.1–3.1)               | 1.3<br>(0.1–3.1)                | 0.1<br>(<0.1–2.6)                  | 0.1<br>(<0.1–2.6)                  |

|                             | Smoking             |                    | Household air pollution |                     | Ambient particulate matter |                     | Handwashing         |                     | Secondhand smoke |                   | Alcohol use        |                   | High temperature   |                    | Low temperature    |                    |
|-----------------------------|---------------------|--------------------|-------------------------|---------------------|----------------------------|---------------------|---------------------|---------------------|------------------|-------------------|--------------------|-------------------|--------------------|--------------------|--------------------|--------------------|
|                             | M                   | F                  | M                       | F                   | M                          | F                   | M                   | F                   | M                | F                 | M                  | F                 | M                  | F                  | M                  | F                  |
| Equatorial Guinea           | 21.0<br>(13.3–29.0) | 1.8<br>(0.8–3.2)   | 3.2<br>(1.2–6.7)        | 4.8<br>(1.9–9.3)    | 20.5<br>(10.1–33.9)        | 20.0<br>(10.1–33.1) | 19.9<br>(9.0–29.7)  | 19.9<br>(9.0–29.7)  | 3.1<br>(1.2–5.6) | 3.8<br>(1.6–6.6)  | 10.4<br>(4.3–16.6) | 4.7<br>(1.1–9.2)  | 0.4<br>(<0.1–1.3)  | 0.4<br>(<0.1–1.3)  | <0.1<br>(<0.1–2.4) | <0.1<br>(<0.1–2.4) |
| Gabon                       | 18.0<br>(11.5–24.7) | 2.3<br>(1.0–4.0)   | 1.2<br>(0.4–2.5)        | 1.8<br>(0.7–3.5)    | 17.8<br>(9.2–30.0)         | 17.7<br>(9.2–29.8)  | 16.9<br>(7.4–25.6)  | 16.9<br>(7.4–25.6)  | 3.5<br>(1.5–6.0) | 4.5<br>(2.0–7.5)  | 12.2<br>(5.4–18.9) | 5.9<br>(1.7–10.5) | 0.7<br>(<0.1–2.6)  | 0.7<br>(<0.1–2.6)  | <0.1<br>(<0.1–1.5) | <0.1<br>(<0.1–1.5) |
| Eastern Sub-Saharan Africa  | 17.1<br>(10.7–23.7) | 3.9<br>(2.1–6.1)   | 39.1<br>(26.4–51.1)     | 45.5<br>(33.6–56.3) | 7.1<br>(3.9–11.0)          | 5.6<br>(3.1–8.8)    | 22.5<br>(10.4–33.1) | 22.5<br>(10.4–33.1) | 2.6<br>(1.0–4.6) | 3.6<br>(1.5–6.3)  | 7.1<br>(2.9–10.8)  | 2.3<br>(0.7–4.0)  | 2.0<br>(0.3–5.5)   | 1.9<br>(0.3–5.2)   | 1.6<br>(<0.1–4.1)  | 1.5<br>(<0.1–4.0)  |
| Burundi                     | 15.5<br>(9.1–22.8)  | 4.2<br>(1.7–7.4)   | 48.3<br>(32.9–60.1)     | 52.7<br>(40.8–64.6) | 5.9<br>(2.0–12.2)          | 4.2<br>(1.3–9.5)    | 22.9<br>(10.6–33.7) | 22.9<br>(10.6–33.7) | 2.0<br>(0.7–3.7) | 2.4<br>(0.9–4.5)  | 12.8<br>(6.2–19.3) | 2.3<br>(0.6–4.2)  | <0.1<br>(<0.1–0.3) | <0.1<br>(<0.1–0.3) | <0.1<br>(<0.1–6.1) | <0.1<br>(<0.1–6.1) |
| Comoros                     | 18.2<br>(10.6–26.1) | 2.9<br>(1.4–5.1)   | 29.2<br>(16.9–43.5)     | 36.9<br>(24.5–49.6) | 6.2<br>(3.4–9.9)           | 5.1<br>(2.8–8.2)    | 21.0<br>(9.6–31.1)  | 21.0<br>(9.6–31.1)  | 5.4<br>(2.5–8.8) | 6.5<br>(3.1–10.4) | 0.8<br>(0.0–2.6)   | 0.3<br>(0.0–1.1)  | 0.7<br>(<0.1–2.9)  | 0.7<br>(<0.1–2.9)  | 0.2<br>(<0.1–2.9)  | 0.2<br>(<0.1–2.9)  |
| Djibouti                    | 29.8<br>(19.5–39.6) | 3.9<br>(1.9–6.6)   | 6.5<br>(2.7–13.2)       | 9.3<br>(4.2–17.1)   | 18.6<br>(9.1–32.2)         | 17.5<br>(8.5–30.7)  | 21.6<br>(9.9–32.0)  | 21.6<br>(9.9–32.0)  | 4.5<br>(2.0–7.8) | 8.7<br>(3.9–14.4) | 0.3<br>(0.0–1.9)   | 0.1<br>(0.0–0.5)  | 5.9<br>(<0.1–30.0) | 5.9<br>(<0.1–30.0) | 0.2<br>(<0.1–5.2)  | 0.2<br>(<0.1–5.2)  |
| Eritrea                     | 16.0<br>(10.4–21.7) | 0.6<br>(0.3–1.0)   | 29.3<br>(16.5–42.7)     | 35.9<br>(23.0–47.4) | 12.8<br>(6.3–21.5)         | 10.4<br>(4.9–17.7)  | 22.6<br>(10.4–33.1) | 22.6<br>(10.4–33.1) | 4.1<br>(2.0–6.7) | 4.0<br>(2.2–6.0)  | 2.0<br>(0.0–5.8)   | 0.4<br>(0.0–1.6)  | 4.5<br>(<0.1–22.1) | 4.5<br>(<0.1–22.1) | 0.1<br>(<0.1–2.5)  | 0.1<br>(<0.1–2.5)  |
| Ethiopia                    | 9.0<br>(5.3–12.8)   | 0.9<br>(0.4–1.6)   | 44.0<br>(29.7–55.6)     | 48.8<br>(37.2–59.8) | 7.2<br>(3.3–12.4)          | 5.5<br>(2.6–10.0)   | 23.0<br>(10.6–33.7) | 22.9<br>(10.7–33.7) | 1.5<br>(0.5–2.9) | 1.5<br>(0.5–2.9)  | 4.9<br>(1.0–9.4)   | 1.5<br>(0.0–3.8)  | 3.2<br>(0.6–10.3)  | 3.2<br>(0.6–10.2)  | 4.6<br>(3.0–6.6)   | 4.6<br>(3.0–6.6)   |
| Kenya                       | 18.8<br>(11.9–25.9) | 2.7<br>(1.3–4.5)   | 26.5<br>(16.0–38.2)     | 33.2<br>(22.3–44.4) | 7.5<br>(4.4–11.5)          | 6.5<br>(3.8–10.0)   | 22.1<br>(10.2–32.6) | 22.2<br>(10.3–32.7) | 2.6<br>(1.1–4.5) | 3.9<br>(1.7–6.6)  | 8.2<br>(2.7–14.0)  | 2.3<br>(0.7–4.2)  | 2.5<br>(0.2–10.1)  | 2.2<br>(0.2–8.9)   | 3.6<br>(1.7–5.9)   | 3.6<br>(1.5–6.0)   |
| Madagascar                  | 16.7<br>(9.5–24.3)  | 2.2<br>(1.0–3.8)   | 39.8<br>(24.8–54.2)     | 47.2<br>(33.7–59.0) | 5.2<br>(2.7–8.8)           | 4.0<br>(2.0–6.9)    | 22.4<br>(10.3–33.0) | 22.4<br>(10.3–33.0) | 2.7<br>(0.8–5.3) | 3.5<br>(1.1–6.9)  | 2.7<br>(0.0–7.1)   | 0.6<br>(0.0–1.9)  | 0.8<br>(<0.1–2.4)  | 0.8<br>(<0.1–2.4)  | 1.0<br>(<0.1–3.8)  | 1.0<br>(<0.1–3.8)  |
| Malawi                      | 21.8<br>(13.5–30.5) | 4.4<br>(2.0–7.4)   | 42.6<br>(27.7–56.0)     | 49.0<br>(35.8–59.8) | 5.6<br>(2.6–10.0)          | 4.3<br>(1.9–7.9)    | 22.6<br>(10.4–33.3) | 22.6<br>(10.4–33.3) | 2.9<br>(1.2–5.1) | 3.5<br>(1.4–6.1)  | 5.1<br>(1.7–9.0)   | 1.5<br>(0.0–3.7)  | 0.5<br>(<0.1–1.9)  | 0.5<br>(<0.1–1.9)  | 0.2<br>(<0.1–4.4)  | 0.2<br>(<0.1–4.4)  |
| Mozambique                  | 18.2<br>(10.7–26.3) | 5.0<br>(2.4–8.2)   | 47.2<br>(31.8–59.3)     | 52.0<br>(40.4–62.6) | 4.4<br>(1.9–8.0)           | 3.2<br>(1.3–6.1)    | 22.2<br>(10.2–32.7) | 22.2<br>(10.2–32.7) | 2.3<br>(0.8–4.4) | 3.2<br>(1.1–6.2)  | 2.2<br>(0.0–6.5)   | 0.6<br>(0.0–2.4)  | 2.4<br>(1.0–4.4)   | 2.4<br>(1.0–4.4)   | 0.2<br>(<0.1–3.3)  | 0.2<br>(<0.1–3.3)  |
| Rwanda                      | 22.5<br>(14.8–30.7) | 11.1<br>(6.7–16.8) | 34.8<br>(21.1–49.2)     | 42.5<br>(29.4–55.2) | 10.4<br>(4.9–18.0)         | 8.3<br>(3.7–15.3)   | 23.2<br>(10.7–34.0) | 23.2<br>(10.7–34.0) | 3.2<br>(1.6–5.1) | 4.7<br>(2.4–7.4)  | 13.7<br>(6.0–20.8) | 4.4<br>(0.9–8.5)  | <0.1<br>(<0.1–0.1) | <0.1<br>(<0.1–0.1) | 2.0<br>(<0.1–7.5)  | 2.0<br>(<0.1–7.5)  |
| Somalia                     | 19.1<br>(11.1–27.0) | 2.9<br>(1.3–5.2)   | 58.4<br>(44.7–79.9)     | 61.4<br>(46.5–85.0) | 2.1<br>(0.5–6.7)           | 1.4<br>(0.3–4.3)    | 22.7<br>(10.5–33.4) | 22.7<br>(10.5–33.4) | 2.9<br>(1.2–5.2) | 4.0<br>(1.7–7.1)  | 0.0<br>(0.0–0.0)   | 0.0<br>(0.0–0.0)  | 2.3<br>(<0.1–15.8) | 2.3<br>(<0.1–15.8) | 0.1<br>(<0.1–1.3)  | 0.1<br>(<0.1–1.3)  |
| South Sudan                 | 18.9<br>(11.2–27.5) | 2.8<br>(1.2–5.0)   | 40.0<br>(25.6–53.9)     | 46.8<br>(33.8–58.2) | 9.3<br>(4.3–15.8)          | 7.1<br>(3.2–12.7)   | 22.9<br>(10.6–33.6) | 22.9<br>(10.6–33.6) | 3.0<br>(1.3–5.2) | 4.3<br>(1.8–7.5)  | 0.3<br>(0.0–1.7)   | 0.1<br>(0.0–0.5)  | 5.9<br>(<0.1–23.1) | 5.9<br>(<0.1–23.1) | <0.1<br>(<0.1–0.9) | <0.1<br>(<0.1–0.9) |
| Uganda                      | 14.5<br>(8.0–21.0)  | 4.4<br>(2.0–7.3)   | 37.3<br>(23.0–51.3)     | 44.7<br>(31.4–56.3) | 9.5<br>(5.0–15.1)          | 7.5<br>(3.7–12.3)   | 22.1<br>(10.1–32.5) | 22.1<br>(10.1–32.5) | 2.6<br>(1.0–4.7) | 3.0<br>(1.2–5.4)  | 15.1<br>(8.2–21.4) | 6.3<br>(2.5–10.4) | 1.1<br>(0.2–2.9)   | 1.1<br>(0.2–2.9)   | <0.1<br>(<0.1–2.3) | <0.1<br>(<0.1–2.3) |
| United Republic of Tanzania | 25.6<br>(16.8–34.7) | 8.6<br>(4.3–13.5)  | 36.6<br>(22.4–51.1)     | 44.3<br>(30.7–56.4) | 7.4<br>(4.1–11.4)          | 5.9<br>(3.2–9.2)    | 22.5<br>(10.4–33.2) | 22.5<br>(10.4–33.2) | 3.6<br>(1.7–6.0) | 6.2<br>(3.0–9.9)  | 13.6<br>(7.2–19.7) | 4.8<br>(1.7–8.0)  | 0.9<br>(0.1–2.7)   | 0.9<br>(0.1–2.7)   | 0.1<br>(<0.1–3.5)  | 0.1<br>(<0.1–3.5)  |
| Zambia                      | 18.1<br>(10.2–26.1) | 4.7<br>(2.0–7.9)   | 23.8<br>(12.7–36.8)     | 31.1<br>(19.5–43.4) | 9.9<br>(5.7–15.7)          | 8.5<br>(4.9–13.4)   | 21.3<br>(9.7–31.5)  | 21.3<br>(9.7–31.5)  | 2.6<br>(0.8–5.1) | 4.2<br>(1.3–8.2)  | 7.6<br>(2.2–12.7)  | 2.8<br>(0.5–5.4)  | 1.2<br>(0.3–3.5)   | 1.2<br>(0.3–3.5)   | <0.1<br>(<0.1–5.0) | <0.1<br>(<0.1–5.0) |

|                             | Smoking             |                    | Household air pollution |                     | Ambient particulate matter |                     | Handwashing         |                     | Secondhand smoke  |                    | Alcohol use        |                   | High temperature    |                     | Low temperature     |                     |
|-----------------------------|---------------------|--------------------|-------------------------|---------------------|----------------------------|---------------------|---------------------|---------------------|-------------------|--------------------|--------------------|-------------------|---------------------|---------------------|---------------------|---------------------|
|                             | M                   | F                  | M                       | F                   | M                          | F                   | M                   | F                   | M                 | F                  | M                  | F                 | M                   | F                   | M                   | F                   |
| Southern Sub-Saharan Africa | 27.2<br>(19.5–34.9) | 7.5<br>(4.6–10.6)  | 9.4<br>(4.6–15.7)       | 12.1<br>(6.9–18.7)  | 12.5<br>(7.9–18.1)         | 12.1<br>(7.8–17.3)  | 16.8<br>(7.5–25.2)  | 16.6<br>(7.5–24.8)  | 4.5<br>(2.2–7.2)  | 7.6<br>(3.9–12.0)  | 11.2<br>(6.0–15.8) | 3.0<br>(1.2–4.9)  | 1.2<br>(0.5–2.4)    | 1.1<br>(0.4–2.3)    | 6.5<br>(3.8–9.2)    | 6.7<br>(4.0–9.4)    |
| Botswana                    | 29.9<br>(22.5–37.2) | 8.7<br>(5.2–12.5)  | 6.6<br>(2.5–13.1)       | 9.6<br>(4.3–17.5)   | 12.1<br>(7.2–18.9)         | 11.6<br>(7.0–17.6)  | 17.0<br>(7.5–25.6)  | 17.0<br>(7.5–25.6)  | 6.3<br>(3.0–10.3) | 9.0<br>(4.5–14.2)  | 10.6<br>(5.1–15.8) | 2.0<br>(0.5–3.6)  | 4.0<br>(1.5–7.7)    | 4.0<br>(1.5–7.7)    | 0.9<br>(<0.1–7.0)   | 0.9<br>(<0.1–7.0)   |
| Eswatini                    | 13.2<br>(8.0–18.8)  | 2.4<br>(1.2–4.0)   | 12.3<br>(5.5–22.2)      | 17.3<br>(9.1–27.7)  | 10.8<br>(6.3–16.4)         | 9.9<br>(6.0–14.8)   | 16.5<br>(7.4–25.0)  | 16.5<br>(7.4–25.0)  | 2.3<br>(0.9–4.2)  | 3.6<br>(1.5–6.3)   | 11.7<br>(6.5–16.7) | 3.4<br>(1.2–5.9)  | 0.4<br>(<0.1–1.2)   | 0.4<br>(<0.1–1.2)   | 3.3<br>(<0.1–8.1)   | 3.3<br>(<0.1–8.1)   |
| Lesotho                     | 32.0<br>(24.3–39.5) | 3.0<br>(1.7–5.0)   | 17.7<br>(8.8–29.2)      | 23.8<br>(13.9–35.1) | 11.3<br>(6.7–17.1)         | 10.0<br>(5.9–15.3)  | 23.1<br>(10.7–33.9) | 23.1<br>(10.7–33.9) | 6.0<br>(3.3–9.0)  | 11.9<br>(7.0–17.0) | 8.4<br>(2.4–14.1)  | 1.9<br>(0.0–4.2)  | <0.1<br>(<0.1–<0.1) | <0.1<br>(<0.1–<0.1) | 21.7<br>(15.2–28.4) | 21.7<br>(15.2–28.4) |
| Namibia                     | 16.0<br>(9.4–22.8)  | 10.4<br>(6.2–15.6) | 9.2<br>(3.8–17.1)       | 13.2<br>(6.4–22.5)  | 11.5<br>(6.4–18.2)         | 10.9<br>(6.1–16.6)  | 14.3<br>(6.2–22.0)  | 14.3<br>(6.2–22.0)  | 3.5<br>(1.4–6.3)  | 4.7<br>(1.8–8.5)   | 11.6<br>(4.7–18.1) | 3.7<br>(0.2–7.9)  | 3.2<br>(1.3–6.0)    | 3.2<br>(1.3–6.0)    | 1.3<br>(<0.1–6.0)   | 1.3<br>(<0.1–6.0)   |
| South Africa                | 25.7<br>(17.7–33.9) | 8.4<br>(5.0–11.9)  | 2.3<br>(0.9–4.6)        | 3.1<br>(1.3–5.6)    | 14.7<br>(9.2–21.4)         | 14.6<br>(9.3–21.1)  | 14.6<br>(6.4–22.2)  | 14.3<br>(6.3–22.1)  | 4.7<br>(2.2–7.8)  | 7.1<br>(3.4–11.6)  | 13.4<br>(7.7–18.4) | 3.9<br>(1.7–6.3)  | 0.7<br>(0.3–1.9)    | 0.6<br>(0.3–1.6)    | 8.6<br>(6.4–11.0)   | 8.8<br>(6.6–11.2)   |
| Zimbabwe                    | 31.5<br>(23.5–39.7) | 5.9<br>(3.5–9.0)   | 24.3<br>(13.1–37.7)     | 31.4<br>(20.2–44.4) | 8.0<br>(4.7–12.6)          | 6.8<br>(3.9–10.6)   | 20.9<br>(9.6–31.0)  | 20.9<br>(9.6–31.0)  | 3.7<br>(1.9–5.7)  | 8.6<br>(4.7–12.9)  | 6.5<br>(1.6–12.2)  | 1.0<br>(0.0–2.6)  | 1.7<br>(0.7–3.8)    | 1.7<br>(0.7–3.8)    | 0.7<br>(<0.1–5.1)   | 0.7<br>(<0.1–5.1)   |
| Western Sub-Saharan Africa  | 16.0<br>(11.0–21.2) | 2.6<br>(1.6–4.0)   | 30.3<br>(19.6–41.3)     | 35.2<br>(25.4–45.7) | 15.5<br>(9.9–22.8)         | 13.3<br>(8.4–19.6)  | 21.8<br>(10.0–32.1) | 21.7<br>(10.0–32.0) | 4.0<br>(2.1–6.3)  | 4.6<br>(2.4–7.0)   | 7.9<br>(3.8–11.4)  | 2.2<br>(0.4–4.2)  | 5.3<br>(0.4–18.7)   | 5.7<br>(0.5–22.2)   | 0.5<br>(<0.1–2.5)   | 0.5<br>(<0.1–2.7)   |
| Benin                       | 15.4<br>(10.3–21.3) | 3.3<br>(1.8–5.4)   | 37.7<br>(23.4–51.9)     | 44.3<br>(31.5–55.4) | 11.3<br>(5.6–18.8)         | 8.8<br>(4.1–15.1)   | 22.1<br>(10.1–32.6) | 22.1<br>(10.1–32.6) | 3.7<br>(1.8–5.9)  | 4.5<br>(2.3–7.2)   | 5.2<br>(1.6–9.2)   | 1.4<br>(0.0–3.6)  | 3.3<br>(<0.1–18.5)  | 3.3<br>(<0.1–18.5)  | <0.1<br>(<0.1–1.2)  | <0.1<br>(<0.1–1.2)  |
| Burkina Faso                | 14.5<br>(8.6–20.6)  | 1.2<br>(0.6–2.2)   | 46.4<br>(30.9–59.2)     | 50.8<br>(38.4–64.4) | 8.4<br>(2.9–16.6)          | 6.0<br>(2.0–12.9)   | 22.2<br>(10.2–32.7) | 22.2<br>(10.2–32.7) | 3.3<br>(1.4–5.8)  | 4.4<br>(1.9–7.8)   | 10.8<br>(4.2–17.6) | 5.8<br>(0.4–11.8) | 4.6<br>(<0.1–34.1)  | 4.6<br>(<0.1–34.1)  | <0.1<br>(<0.1–3.1)  | <0.1<br>(<0.1–3.1)  |
| Cabo Verde                  | 16.0<br>(10.8–21.4) | 4.0<br>(2.0–6.4)   | 5.5<br>(2.4–10.4)       | 8.0<br>(4.1–13.7)   | 22.0<br>(13.6–31.9)        | 21.0<br>(13.2–30.6) | 19.0<br>(8.5–28.3)  | 19.0<br>(8.5–28.3)  | 4.0<br>(1.9–6.5)  | 4.5<br>(2.1–7.2)   | 10.1<br>(5.1–15.0) | 4.0<br>(1.0–7.3)  | 0.2<br>(<0.1–1.1)   | 0.2<br>(<0.1–1.1)   | <0.1<br>(<0.1–6.3)  | <0.1<br>(<0.1–6.3)  |
| Cameroon                    | 21.4<br>(15.1–28.4) | 1.4<br>(0.7–2.5)   | 19.3<br>(10.4–30.8)     | 25.8<br>(15.8–37.7) | 20.9<br>(13.2–29.7)        | 18.3<br>(11.5–26.1) | 21.8<br>(10.0–32.1) | 21.8<br>(10.0–32.1) | 2.6<br>(1.3–4.2)  | 4.2<br>(2.1–6.8)   | 11.2<br>(5.8–16.5) | 4.6<br>(1.5–8.2)  | 2.0<br>(0.1–7.1)    | 2.0<br>(0.1–7.1)    | <0.1<br>(<0.1–1.6)  | <0.1<br>(<0.1–1.6)  |
| Chad                        | 16.6<br>(10.3–23.3) | 2.6<br>(1.2–4.5)   | 47.3<br>(32.6–60.6)     | 51.6<br>(39.7–65.9) | 8.4<br>(2.9–17.8)          | 6.0<br>(2.1–13.8)   | 22.3<br>(10.2–32.8) | 22.3<br>(10.2–32.8) | 3.1<br>(1.3–5.2)  | 4.6<br>(2.1–7.7)   | 4.9<br>(0.6–9.4)   | 2.8<br>(0.0–7.0)  | 7.0<br>(0.4–22.9)   | 7.0<br>(0.4–22.9)   | 1.3<br>(<0.1–7.7)   | 1.3<br>(<0.1–7.7)   |
| Côte d'Ivoire               | 21.6<br>(15.3–27.9) | 4.1<br>(2.2–6.8)   | 29.4<br>(17.1–43.7)     | 36.6<br>(24.5–48.9) | 15.5<br>(8.3–25.4)         | 12.7<br>(6.4–21.5)  | 20.8<br>(9.5–31.0)  | 20.8<br>(9.5–31.0)  | 6.4<br>(3.4–9.5)  | 7.8<br>(4.3–11.8)  | 8.9<br>(2.5–15.0)  | 2.7<br>(0.0–6.2)  | 1.6<br>(<0.1–5.7)   | 1.6<br>(<0.1–5.7)   | 0.2<br>(<0.1–1.2)   | 0.2<br>(<0.1–1.2)   |
| Gambia                      | 24.6<br>(17.4–31.7) | 1.4<br>(0.7–2.5)   | 34.9<br>(21.2–48.8)     | 41.9<br>(28.7–53.4) | 14.2<br>(7.3–23.0)         | 11.3<br>(5.6–19.1)  | 21.9<br>(10.1–32.3) | 21.9<br>(10.1–32.3) | 5.9<br>(3.1–8.9)  | 8.9<br>(4.7–13.5)  | 5.9<br>(2.1–10.1)  | 1.7<br>(0.0–4.0)  | 2.2<br>(<0.1–20.9)  | 2.2<br>(<0.1–20.9)  | 0.1<br>(<0.1–1.5)   | 0.1<br>(<0.1–1.5)   |
| Ghana                       | 12.7<br>(7.7–18.0)  | 2.1<br>(1.1–3.4)   | 14.2<br>(7.1–23.9)      | 19.7<br>(11.2–30.3) | 20.3<br>(12.9–30.3)        | 18.4<br>(11.5–27.6) | 22.3<br>(10.3–32.8) | 22.3<br>(10.3–32.8) | 2.5<br>(1.1–4.2)  | 2.5<br>(1.2–4.2)   | 9.4<br>(3.2–15.3)  | 2.1<br>(0.0–4.7)  | 2.9<br>(<0.1–18.5)  | 2.9<br>(<0.1–18.5)  | <0.1<br>(<0.1–0.7)  | <0.1<br>(<0.1–0.7)  |
| Guinea                      | 28.3<br>(19.7–36.9) | 2.6<br>(1.3–4.6)   | 43.6<br>(28.5–56.2)     | 48.8<br>(36.2–60.4) | 9.9<br>(4.2–17.7)          | 7.3<br>(3.1–14.2)   | 22.3<br>(10.3–32.8) | 22.3<br>(10.3–32.8) | 4.4<br>(2.0–6.9)  | 5.9<br>(2.9–9.0)   | 2.6<br>(0.4–5.1)   | 0.4<br>(0.0–1.3)  | 2.7<br>(0.7–7.1)    | 2.7<br>(0.7–7.1)    | 0.1<br>(<0.1–1.3)   | 0.1<br>(<0.1–1.3)   |
| Guinea-Bissau               | 11.2<br>(7.4–15.5)  | 1.5<br>(0.8–2.4)   | 41.0<br>(25.8–54.2)     | 46.9<br>(33.9–58.0) | 11.2<br>(5.0–19.4)         | 8.5<br>(3.7–15.5)   | 22.3<br>(10.3–32.8) | 22.3<br>(10.3–32.8) | 4.4<br>(2.2–6.9)  | 5.7<br>(2.9–8.7)   | 6.6<br>(2.4–10.8)  | 1.8<br>(0.0–4.2)  | 2.2<br>(<0.1–22.7)  | 2.2<br>(<0.1–22.7)  | <0.1<br>(<0.1–1.3)  | <0.1<br>(<0.1–1.3)  |

|                       | Smoking             |                   | Household air pollution |                     | Ambient particulate matter |                     | Handwashing         |                     | Secondhand smoke  |                   | Alcohol use        |                   | High temperature   |                    | Low temperature    |                    |
|-----------------------|---------------------|-------------------|-------------------------|---------------------|----------------------------|---------------------|---------------------|---------------------|-------------------|-------------------|--------------------|-------------------|--------------------|--------------------|--------------------|--------------------|
|                       | M                   | F                 | M                       | F                   | M                          | F                   | M                   | F                   | M                 | F                 | M                  | F                 | M                  | F                  | M                  | F                  |
| Liberia               | 17.9<br>(11.4–25.2) | 2.9<br>(1.4–4.8)  | 38.4<br>(23.3–51.5)     | 44.9<br>(32.1–56.0) | 11.8<br>(5.7–20.2)         | 9.0<br>(4.4–15.8)   | 23.3<br>(10.8–34.1) | 23.3<br>(10.8–34.1) | 2.4<br>(1.0–4.3)  | 3.4<br>(1.5–5.8)  | 7.3<br>(2.6–12.1)  | 3.0<br>(0.7–5.5)  | 0.9<br>(<0.1–3.3)  | 0.9<br>(<0.1–3.3)  | 0.1<br>(<0.1–2.0)  | 0.1<br>(<0.1–2.0)  |
| Mali                  | 18.0<br>(11.7–25.0) | 3.4<br>(1.6–5.9)  | 46.8<br>(31.2–59.6)     | 51.3<br>(38.0–65.0) | 9.0<br>(3.1–17.7)          | 6.5<br>(2.3–13.8)   | 21.9<br>(10.1–32.3) | 21.9<br>(10.1–32.3) | 3.3<br>(1.4–5.6)  | 4.4<br>(2.0–7.2)  | 1.9<br>(0.7–3.3)   | 1.4<br>(0.2–2.9)  | 7.3<br>(<0.1–26.7) | 7.3<br>(<0.1–26.7) | 1.3<br>(<0.1–13.3) | 1.3<br>(<0.1–13.3) |
| Mauritania            | 21.4<br>(14.4–28.8) | 5.3<br>(2.7–8.8)  | 14.9<br>(7.2–25.1)      | 20.4<br>(11.4–30.8) | 22.6<br>(13.2–34.5)        | 20.3<br>(11.6–31.1) | 19.6<br>(8.8–29.2)  | 19.6<br>(8.8–29.2)  | 3.5<br>(1.5–6.1)  | 4.7<br>(2.1–8.1)  | <0.1<br>(0.0–<0.1) | <0.1<br>(0.0–0.0) | 8.0<br>(1.7–19.5)  | 8.0<br>(1.7–19.5)  | 1.9<br>(<0.1–13.0) | 1.9<br>(<0.1–13.0) |
| Niger                 | 10.2<br>(6.4–14.6)  | 1.6<br>(0.7–2.7)  | 51.0<br>(35.2–69.0)     | 55.1<br>(40.4–75.8) | 7.5<br>(2.1–19.0)          | 5.3<br>(1.5–14.5)   | 21.4<br>(9.8–31.7)  | 21.4<br>(9.8–31.7)  | 3.8<br>(1.9–6.3)  | 4.6<br>(2.4–7.1)  | 0.4<br>(0.0–1.7)   | 0.1<br>(0.0–0.6)  | 8.4<br>(0.5–23.3)  | 8.4<br>(0.5–23.3)  | 1.6<br>(<0.1–11.5) | 1.6<br>(<0.1–11.5) |
| Nigeria               | 11.0<br>(7.6–14.9)  | 2.6<br>(1.4–4.3)  | 25.8<br>(16.3–36.4)     | 27.0<br>(18.6–37.0) | 18.4<br>(11.3–27.5)        | 17.1<br>(10.4–25.1) | 21.9<br>(10.0–32.1) | 21.7<br>(10.0–32.0) | 4.6<br>(2.5–7.2)  | 3.7<br>(2.0–5.5)  | 10.1<br>(5.4–14.6) | 2.0<br>(0.2–4.4)  | 9.1<br>(1.3–40.2)  | 8.1<br>(0.9–37.2)  | 1.0<br>(<0.1–2.8)  | 0.8<br>(<0.1–2.3)  |
| Sao Tome and Principe | 15.0<br>(10.1–20.5) | 2.3<br>(1.1–4.0)  | 17.3<br>(8.5–28.6)      | 23.3<br>(13.5–34.4) | 12.5<br>(6.9–19.8)         | 11.0<br>(6.0–17.6)  | 17.4<br>(7.7–26.1)  | 17.4<br>(7.7–26.1)  | 2.1<br>(1.0–3.3)  | 2.3<br>(1.1–3.6)  | 11.0<br>(5.5–16.5) | 4.4<br>(1.2–8.0)  | 0.9<br>(<0.1–3.7)  | 0.9<br>(<0.1–3.7)  | <0.1<br>(<0.1–1.9) | <0.1<br>(<0.1–1.9) |
| Senegal               | 21.5<br>(15.5–28.0) | 2.3<br>(1.1–4.1)  | 32.1<br>(18.7–45.3)     | 38.6<br>(26.3–50.1) | 15.1<br>(7.9–24.1)         | 12.0<br>(5.9–20.1)  | 18.8<br>(8.4–28.1)  | 18.8<br>(8.4–28.1)  | 7.0<br>(3.9–10.4) | 9.3<br>(5.3–13.5) | 0.9<br>(<0.1–1.9)  | 0.2<br>(0.0–0.6)  | 4.2<br>(<0.1–30.1) | 4.2<br>(<0.1–30.1) | 0.1<br>(<0.1–2.2)  | 0.1<br>(<0.1–2.2)  |
| Sierra Leone          | 25.7<br>(16.4–34.8) | 6.4<br>(3.1–10.2) | 41.7<br>(26.6–54.7)     | 47.5<br>(34.8–58.5) | 10.5<br>(4.5–18.6)         | 7.9<br>(3.5–14.6)   | 22.2<br>(10.2–32.6) | 22.2<br>(10.2–32.6) | 3.6<br>(1.4–6.5)  | 5.7<br>(2.3–10.0) | 8.4<br>(3.6–13.2)  | 3.1<br>(0.5–6.0)  | 1.8<br>(<0.1–4.3)  | 1.8<br>(<0.1–4.3)  | 0.2<br>(<0.1–1.5)  | 0.2<br>(<0.1–1.5)  |
| Togo                  | 24.1<br>(18.3–30.8) | 5.2<br>(3.1–8.1)  | 32.2<br>(19.3–46.2)     | 39.8<br>(27.4–51.7) | 13.0<br>(7.0–20.7)         | 10.5<br>(5.7–16.7)  | 22.0<br>(10.1–32.5) | 22.0<br>(10.1–32.5) | 5.3<br>(3.1–7.8)  | 6.1<br>(3.6–8.9)  | 5.6<br>(1.7–9.9)   | 1.5<br>(0.0–3.8)  | 2.7<br>(<0.1–13.0) | 2.7<br>(<0.1–13.0) | 0.1<br>(<0.1–0.9)  | 0.1<br>(<0.1–0.9)  |

Appendix table 11. Population-attributable fractions of lower respiratory infections due to evaluated risk factors among people aged 70 years and older in 2019, males (M) and females (F) (95% UI)

|                                                         | Smoking                    |                         | Household air pollution  |                           | Ambient particulate matter |                           | Handwashing              |                          | Secondhand smoke        |                          | Alcohol use               |                         | High temperature             |                              | Low temperature            |                            |
|---------------------------------------------------------|----------------------------|-------------------------|--------------------------|---------------------------|----------------------------|---------------------------|--------------------------|--------------------------|-------------------------|--------------------------|---------------------------|-------------------------|------------------------------|------------------------------|----------------------------|----------------------------|
|                                                         | M                          | F                       | M                        | F                         | M                          | F                         | M                        | F                        | M                       | F                        | M                         | F                       | M                            | F                            | M                          | F                          |
| <b>Global</b>                                           | <b>21.9</b><br>(16.8–27.3) | <b>6.0</b><br>(4.0–8.0) | <b>8.2</b><br>(4.9–12.3) | <b>10.2</b><br>(6.8–14.2) | <b>12.8</b><br>(8.9–17.2)  | <b>11.7</b><br>(8.2–15.8) | <b>7.2</b><br>(3.1–11.2) | <b>7.1</b><br>(3.1–10.9) | <b>5.9</b><br>(3.5–8.7) | <b>7.3</b><br>(4.3–10.5) | <b>6.3</b><br>(2.8–9.4)   | <b>1.8</b><br>(0.5–3.2) | <b>2.3</b><br>(1.1–4.8)      | <b>2.2</b><br>(1.1–4.9)      | <b>9.0</b><br>(6.5–11.7)   | <b>9.0</b><br>(6.6–11.8)   |
| <b>Central Europe, Eastern Europe, and Central Asia</b> | <b>28.1</b><br>(22.0–34.1) | <b>5.8</b><br>(3.8–7.9) | <b>0.8</b><br>(0.3–1.9)  | <b>1.2</b><br>(0.4–2.5)   | <b>8.9</b><br>(5.4–13.5)   | <b>8.7</b><br>(5.2–13.2)  | <b>1.8</b><br>(0.7–2.9)  | <b>1.8</b><br>(0.7–3.0)  | <b>6.7</b><br>(4.1–9.5) | <b>8.5</b><br>(5.2–12.0) | <b>11.6</b><br>(5.9–16.3) | <b>1.6</b><br>(0.1–3.2) | <b>&lt;0.1</b><br>(<0.1–0.3) | <b>&lt;0.1</b><br>(<0.1–0.3) | <b>19.3</b><br>(11.6–28.2) | <b>19.1</b><br>(11.3–28.1) |
| Central Asia                                            | 28.1<br>(22.0–34.4)        | 1.6<br>(0.9–2.3)        | 2.4<br>(0.9–4.6)         | 3.2<br>(1.4–6.2)          | 13.2<br>(7.6–20.2)         | 12.8<br>(7.4–19.6)        | 4.2<br>(1.7–6.8)         | 4.1<br>(1.6–6.6)         | 8.3<br>(5.1–11.7)       | 10.8<br>(6.8–14.9)       | 3.9<br>(1.2–6.7)          | 0.5<br>(0.0–1.4)        | 0.5<br>(<0.1–1.4)            | 0.5<br>(<0.1–1.4)            | 18.3<br>(12.2–26.2)        | 18.3<br>(12.2–25.9)        |
| Armenia                                                 | 34.9<br>(27.0–42.4)        | 0.8<br>(0.5–1.4)        | 0.3<br>(0.1–0.8)         | 0.5<br>(0.2–1.3)          | 16.8<br>(9.1–26.9)         | 16.8<br>(9.2–26.9)        | 3.8<br>(1.5–6.2)         | 3.8<br>(1.5–6.2)         | 10.1<br>(6.3–14.1)      | 14.3<br>(9.2–19.5)       | 1.5<br>(0.0–3.7)          | 0.5<br>(0.0–1.4)        | <0.1<br>(<0.1–0.2)           | <0.1<br>(<0.1–0.2)           | 18.4<br>(8.4–31.6)         | 18.4<br>(8.4–31.6)         |
| Azerbaijan                                              | 39.4<br>(32.1–47.1)        | 0.6<br>(0.3–1.1)        | 0.9<br>(0.3–2.0)         | 1.3<br>(0.4–2.9)          | 12.9<br>(6.1–22.6)         | 12.9<br>(6.2–22.4)        | 3.5<br>(1.4–5.7)         | 3.5<br>(1.4–5.7)         | 10.3<br>(6.5–14.5)      | 15.4<br>(10.2–21.4)      | 7.5<br>(2.5–12.7)         | 1.1<br>(0.0–2.8)        | 0.5<br>(<0.1–1.1)            | 0.5<br>(<0.1–1.1)            | 15.7<br>(12.6–19.1)        | 15.7<br>(12.6–19.1)        |
| Georgia                                                 | 30.2<br>(23.6–36.9)        | 2.8<br>(1.7–4.3)        | 3.9<br>(1.2–8.5)         | 5.8<br>(2.1–12.1)         | 9.1<br>(5.3–14.5)          | 9.0<br>(5.3–13.7)         | 3.3<br>(1.3–5.4)         | 3.3<br>(1.3–5.4)         | 10.6<br>(6.7–14.9)      | 14.3<br>(9.3–19.4)       | 6.2<br>(2.1–10.2)         | 0.2<br>(0.0–0.8)        | <0.1<br>(<0.1–0.2)           | <0.1<br>(<0.1–0.2)           | 18.9<br>(11.2–29.0)        | 18.9<br>(11.2–29.0)        |
| Kazakhstan                                              | 28.6<br>(21.8–35.4)        | 2.0<br>(1.1–3.2)        | 1.2<br>(0.3–2.8)         | 1.8<br>(0.6–4.2)          | 10.3<br>(5.4–16.8)         | 10.3<br>(5.4–16.6)        | 3.4<br>(1.4–5.7)         | 3.4<br>(1.4–5.7)         | 6.5<br>(3.7–9.9)        | 8.9<br>(5.2–12.9)        | 4.1<br>(0.7–8.1)          | 0.7<br>(0.0–2.2)        | 0.5<br>(<0.1–2.0)            | 0.5<br>(<0.1–2.0)            | 18.4<br>(11.3–27.6)        | 18.4<br>(11.3–27.6)        |
| Kyrgyzstan                                              | 30.7<br>(24.3–37.4)        | 1.6<br>(0.9–2.4)        | 5.4<br>(2.2–10.4)        | 7.9<br>(3.6–14.5)         | 11.8<br>(6.3–19.4)         | 11.3<br>(6.2–18.4)        | 4.0<br>(1.6–6.5)         | 4.0<br>(1.6–6.5)         | 10.7<br>(6.8–14.9)      | 15.2<br>(9.9–20.4)       | 3.3<br>(1.0–6.0)          | 0.2<br>(0.0–0.7)        | <0.1<br>(<0.1–<0.1)          | <0.1<br>(<0.1–<0.1)          | 21.4<br>(8.4–37.4)         | 21.4<br>(8.4–37.4)         |
| Mongolia                                                | 31.9<br>(24.2–39.2)        | 6.0<br>(3.3–9.2)        | 6.5<br>(2.6–12.6)        | 9.5<br>(4.3–16.9)         | 17.3<br>(10.9–24.5)        | 16.6<br>(10.7–23.5)       | 8.5<br>(3.6–13.6)        | 8.5<br>(3.6–13.6)        | 5.5<br>(3.0–8.4)        | 8.6<br>(4.9–12.7)        | 5.9<br>(1.9–10.2)         | 0.3<br>(0.0–1.2)        | 0.2<br>(<0.1–0.9)            | 0.2<br>(<0.1–0.9)            | 18.3<br>(3.6–34.9)         | 18.3<br>(3.6–34.9)         |
| Tajikistan                                              | 21.9<br>(16.1–28.3)        | 1.0<br>(0.6–1.7)        | 7.5<br>(3.2–14.0)        | 10.7<br>(5.3–18.2)        | 16.9<br>(8.1–28.7)         | 15.9<br>(7.7–27.1)        | 7.1<br>(2.9–11.3)        | 7.1<br>(2.9–11.3)        | 8.9<br>(5.5–12.7)       | 7.3<br>(4.6–10.5)        | 1.7<br>(0.0–3.8)          | 0.1<br>(0.0–0.4)        | 0.3<br>(0.1–0.5)             | 0.3<br>(0.1–0.5)             | 21.4<br>(9.3–34.9)         | 21.4<br>(9.3–34.9)         |
| Turkmenistan                                            | 20.7<br>(15.6–26.3)        | 1.1<br>(0.6–1.8)        | <0.1<br>(<0.1–<0.1)      | <0.1<br>(<0.1–0.1)        | 13.3<br>(6.3–23.0)         | 13.3<br>(6.3–23.0)        | 4.6<br>(1.9–7.4)         | 4.6<br>(1.9–7.4)         | 13.7<br>(9.0–18.8)      | 15.8<br>(10.4–21.4)      | 4.6<br>(1.2–8.4)          | 0.2<br>(0.0–0.9)        | 2.6<br>(0.9–4.3)             | 2.6<br>(0.9–4.3)             | 12.7<br>(10.0–15.4)        | 12.7<br>(10.0–15.4)        |
| Uzbekistan                                              | 20.7<br>(14.7–27.3)        | 0.9<br>(0.5–1.7)        | 1.6<br>(0.6–3.5)         | 2.4<br>(0.9–5.0)          | 16.9<br>(8.4–28.0)         | 16.7<br>(8.4–27.5)        | 4.5<br>(1.8–7.3)         | 4.5<br>(1.8–7.3)         | 6.5<br>(3.5–9.8)        | 7.4<br>(4.3–10.9)        | 2.1<br>(0.1–4.3)          | 0.1<br>(0.0–0.6)        | 1.0<br>(<0.1–2.7)            | 1.0<br>(<0.1–2.7)            | 18.0<br>(13.9–22.0)        | 18.0<br>(13.9–22.0)        |
| Central Europe                                          | 24.4<br>(18.6–30.2)        | 8.7<br>(5.8–11.7)       | 1.0<br>(0.3–2.4)         | 1.5<br>(0.4–3.3)          | 10.2<br>(6.3–15.1)         | 10.2<br>(6.2–15.0)        | 1.0<br>(0.4–1.7)         | 1.0<br>(0.4–1.7)         | 7.6<br>(4.6–10.7)       | 8.6<br>(5.2–12.2)        | 13.9<br>(7.6–19.3)        | 1.7<br>(<0.1–3.5)       | <0.1<br>(<0.1–0.1)           | <0.1<br>(<0.1–0.1)           | 21.1<br>(14.7–28.8)        | 21.1<br>(14.5–28.9)        |
| Albania                                                 | 39.5<br>(31.9–47.3)        | 8.6<br>(5.5–12.6)       | 3.8<br>(1.2–8.2)         | 5.6<br>(2.0–11.7)         | 9.5<br>(5.8–14.4)          | 9.4<br>(5.8–14.0)         | 1.7<br>(0.7–2.9)         | 1.7<br>(0.7–2.9)         | 11.9<br>(7.7–16.7)      | 14.9<br>(9.8–20.2)       | 5.5<br>(1.2–10.2)         | 0.4<br>(0.0–1.4)        | <0.1<br>(<0.1–0.1)           | <0.1<br>(<0.1–0.1)           | 19.2<br>(14.6–24.1)        | 19.2<br>(14.6–24.1)        |
| Bosnia and Herzegovina                                  | 35.5<br>(28.3–42.7)        | 15.0<br>(10.9–19.8)     | 3.8<br>(1.2–8.5)         | 5.6<br>(2.0–11.7)         | 14.6<br>(9.3–20.5)         | 14.3<br>(9.3–20.0)        | 1.3<br>(0.5–2.1)         | 1.3<br>(0.5–2.1)         | 11.2<br>(7.0–15.7)      | 12.7<br>(8.2–17.8)       | 7.3<br>(2.7–11.7)         | 0.5<br>(0.0–1.8)        | <0.1<br>(<0.1–<0.1)          | <0.1<br>(<0.1–<0.1)          | 22.3<br>(15.8–29.9)        | 22.3<br>(15.8–29.9)        |
| Bulgaria                                                | 27.1<br>(21.0–33.7)        | 6.3<br>(4.2–8.9)        | 1.6<br>(0.4–4.2)         | 2.5<br>(0.7–5.8)          | 10.0<br>(6.2–14.9)         | 9.9<br>(6.2–14.7)         | 1.1<br>(0.4–1.8)         | 1.1<br>(0.4–1.8)         | 6.9<br>(4.1–9.9)        | 9.7<br>(6.0–13.6)        | 15.1<br>(8.4–21.0)        | 2.2<br>(0.2–4.6)        | <0.1<br>(<0.1–<0.1)          | <0.1<br>(<0.1–<0.1)          | 21.3<br>(14.8–27.9)        | 21.3<br>(14.8–27.9)        |
| Croatia                                                 | 26.9<br>(20.2–33.4)        | 11.2<br>(7.6–15.7)      | 0.4<br>(0.1–1.1)         | 0.6<br>(0.2–1.7)          | 9.4<br>(5.7–14.3)          | 9.4<br>(5.7–14.2)         | 1.0<br>(0.4–1.6)         | 1.0<br>(0.4–1.6)         | 10.1<br>(6.1–14.5)      | 12.2<br>(7.7–17.0)       | 13.8<br>(6.1–20.7)        | 2.0<br>(0.0–5.0)        | <0.1<br>(<0.1–0.1)           | <0.1<br>(<0.1–0.1)           | 20.6<br>(13.3–27.4)        | 20.6<br>(13.3–27.4)        |

|                     | Smoking                           |                                 | Household air pollution                |                                    | Ambient particulate matter     |                                | Handwashing                    |                                | Secondhand smoke               |                                | Alcohol use                     |                                | High temperature               |                                | Low temperature                   |                                   |
|---------------------|-----------------------------------|---------------------------------|----------------------------------------|------------------------------------|--------------------------------|--------------------------------|--------------------------------|--------------------------------|--------------------------------|--------------------------------|---------------------------------|--------------------------------|--------------------------------|--------------------------------|-----------------------------------|-----------------------------------|
|                     | M                                 | F                               | M                                      | F                                  | M                              | F                              | M                              | F                              | M                              | F                              | M                               | F                              | M                              | F                              | M                                 | F                                 |
| Czechia             | 25.0<br>(19.2–30.9)               | 11.2<br>(7.4–15.4)              | 0.1<br>(<0.1–0.2)                      | 0.1<br>(<0.1–0.4)                  | 8.4<br>(5.0–13.0)              | 8.4<br>(5.0–13.0)              | 0.9<br>(0.3–1.4)               | 0.9<br>(0.3–1.4)               | 9.2<br>(5.7–13.2)              | 6.3<br>(3.8–9.0)               | 16.9<br>(9.0–23.7)              | 4.9<br>(1.4–9.0)               | <0.1<br>(<0.1–0.2)             | <0.1<br>(<0.1–0.2)             | 21.1<br>(13.6–30.0)               | 21.1<br>(13.6–30.0)               |
| Hungary             | 22.3<br>(16.5–28.6)               | 7.5<br>(4.9–10.5)               | 1.3<br>(0.3–3.6)                       | 2.0<br>(0.5–5.4)                   | 8.4<br>(5.0–12.9)              | 8.4<br>(5.1–12.8)              | 0.9<br>(0.4–1.4)               | 0.9<br>(0.4–1.4)               | 10.1<br>(6.3–14.3)             | 10.4<br>(6.5–14.7)             | 15.9<br>(8.1–22.5)              | 2.2<br>(0.1–4.8)               | <0.1<br>(<0.1–0.2)             | <0.1<br>(<0.1–0.2)             | 21.4<br>(11.9–30.6)               | 21.4<br>(11.9–30.6)               |
| Montenegro          | 35.0<br>(27.7–42.4)               | 16.1<br>(11.0–22.3)             | 2.7<br>(0.7–6.4)                       | 4.0<br>(1.1–9.1)                   | 10.9<br>(6.8–16.1)             | 10.8<br>(6.8–15.8)             | 1.2<br>(0.5–2.0)               | 1.2<br>(0.5–2.0)               | 12.9<br>(8.2–17.8)             | 14.5<br>(9.3–19.9)             | 13.6<br>(6.7–20.1)              | 1.8<br>(0.0–4.4)               | <0.1<br>(<0.1–0.1)             | <0.1<br>(<0.1–0.1)             | 20.4<br>(14.1–28.1)               | 20.4<br>(14.1–28.1)               |
| North Macedonia     | 30.7<br>(23.8–37.5)               | 13.6<br>(9.1–18.9)              | 2.4<br>(0.7–5.6)                       | 3.6<br>(1.2–7.8)                   | 15.2<br>(9.7–21.6)             | 15.0<br>(9.7–21.2)             | 1.0<br>(0.4–1.7)               | 1.0<br>(0.4–1.7)               | 11.9<br>(7.4–16.6)             | 12.7<br>(8.0–17.8)             | 11.1<br>(4.8–16.9)              | 0.6<br>(0.0–2.0)               | <0.1<br>(<0.1–0.1)             | <0.1<br>(<0.1–0.1)             | 21.8<br>(15.6–28.1)               | 21.8<br>(15.6–28.1)               |
| Poland              | 23.9<br>(18.1–29.5)               | 9.0<br>(5.8–12.4)               | 0.9<br>(0.2–2.4)                       | 1.4<br>(0.4–3.4)                   | 11.5<br>(7.2–17.0)             | 11.5<br>(7.2–16.9)             | 1.0<br>(0.4–1.6)               | 1.0<br>(0.4–1.6)               | 6.0<br>(3.4–9.0)               | 8.1<br>(4.7–11.9)              | 13.8<br>(7.8–19.3)              | 0.4<br>(0.0–1.5)               | <0.1<br>(<0.1–0.2)             | <0.1<br>(<0.1–0.2)             | 21.1<br>(13.4–30.2)               | 21.1<br>(13.4–30.2)               |
| Romania             | 21.5<br>(15.2–28.2)               | 6.4<br>(3.9–9.4)                | 1.1<br>(0.3–2.7)                       | 1.6<br>(0.4–4.1)                   | 7.9<br>(4.7–12.1)              | 7.9<br>(4.8–12.1)              | 1.2<br>(0.5–2.0)               | 1.2<br>(0.5–2.0)               | 7.8<br>(4.5–11.2)              | 9.0<br>(5.2–13.1)              | 13.6<br>(6.9–20.1)              | 3.0<br>(0.4–5.7)               | <0.1<br>(<0.1–0.1)             | <0.1<br>(<0.1–0.1)             | 20.7<br>(14.2–28.2)               | 20.7<br>(14.2–28.2)               |
| Serbia              | 28.7<br>(21.9–35.4)               | 13.1<br>(9.0–17.8)              | 1.9<br>(0.5–4.8)                       | 2.9<br>(0.9–6.9)                   | 13.0<br>(8.2–19.2)             | 12.9<br>(8.2–18.9)             | 1.0<br>(0.4–1.6)               | 1.0<br>(0.4–1.6)               | 9.7<br>(5.9–14.0)              | 9.9<br>(6.0–14.2)              | 11.3<br>(5.2–17.0)              | 1.0<br>(0.0–2.3)               | <0.1<br>(<0.1–0.1)             | <0.1<br>(<0.1–0.1)             | 21.9<br>(14.8–28.9)               | 21.9<br>(14.8–28.9)               |
| Slovakia            | 23.3<br>(16.7–29.9)               | 4.5<br>(2.7–6.8)                | 0.1<br>(<0.1–0.2)                      | 0.1<br>(<0.1–0.3)                  | 9.4<br>(5.5–14.5)              | 9.4<br>(5.5–14.4)              | 0.9<br>(0.3–1.4)               | 0.9<br>(0.3–1.4)               | 7.4<br>(4.3–10.8)              | 8.7<br>(5.3–12.4)              | 16.5<br>(9.4–22.8)              | 1.1<br>(0.0–3.6)               | <0.1<br>(<0.1–0.1)             | <0.1<br>(<0.1–0.1)             | 20.2<br>(13.2–29.4)               | 20.2<br>(13.2–29.4)               |
| Slovenia            | 16.7<br>(12.5–21.5)               | 7.0<br>(4.8–9.7)                | 0.5<br>(0.1–1.5)                       | 0.8<br>(0.2–2.2)                   | 8.6<br>(5.3–13.3)              | 8.6<br>(5.3–13.2)              | 0.8<br>(0.3–1.4)               | 0.8<br>(0.3–1.4)               | 7.8<br>(5.0–11.3)              | 8.0<br>(5.0–11.5)              | 9.5<br>(0.8–19.2)               | 1.0<br>(0.0–3.9)               | <0.1<br>(<0.1–0.1)             | <0.1<br>(<0.1–0.1)             | 22.1<br>(15.2–30.1)               | 22.1<br>(15.2–30.1)               |
| Eastern Europe      | 33.7<br>(26.9–40.4)               | 3.0<br>(2.0–4.3)                | 0.2<br>(<0.1–0.5)                      | 0.3<br>(0.1–0.7)                   | 5.6<br>(2.9–9.7)               | 5.7<br>(3.0–9.7)               | 2.3<br>(0.9–3.8)               | 2.3<br>(0.9–3.8)               | 4.8<br>(2.9–6.8)               | 7.8<br>(4.8–11.1)              | 10.1<br>(4.8–15.0)              | 1.8<br>(0.2–3.7)               | <0.1<br>(<0.1–0.3)             | <0.1<br>(<0.1–0.3)             | 16.8<br>(1.2–30.1)                | 16.8<br>(1.8–29.8)                |
| Belarus             | 33.4<br>(26.2–40.9)               | 1.5<br>(0.9–2.3)                | 0.1<br>(<0.1–0.2)                      | 0.1<br>(<0.1–0.3)                  | 8.2<br>(4.7–13.0)              | 8.2<br>(4.7–13.0)              | 1.9<br>(0.8–3.1)               | 1.9<br>(0.8–3.1)               | 3.9<br>(2.3–5.8)               | 8.1<br>(4.9–11.6)              | 14.8<br>(7.7–21.3)              | 2.0<br>(0.3–4.0)               | <0.1<br>(<0.1–0.2)             | <0.1<br>(<0.1–0.2)             | 18.3<br>(9.6–30.8)                | 18.3<br>(9.6–30.8)                |
| Estonia             | 25.4<br>(19.1–31.6)               | 7.2<br>(4.4–10.2)               | 0.4<br>(<0.1–1.2)                      | 0.6<br>(0.1–1.9)                   | 1.7<br>(0.5–3.5)               | 1.9<br>(0.7–3.7)               | 1.8<br>(0.7–3.0)               | 1.8<br>(0.7–3.0)               | 7.4<br>(4.6–10.7)              | 5.2<br>(3.0–7.8)               | 15.4<br>(8.0–22.0)              | 2.6<br>(0.0–5.7)               | 0.1<br>(<0.1–0.5)              | 0.1<br>(<0.1–0.5)              | 15.8<br>(3.4–32.6)                | 15.8<br>(3.4–32.6)                |
| Latvia              | 25.0<br>(18.0–32.0)               | 4.0<br>(2.3–5.9)                | 0.4<br>(0.1–1.1)                       | 0.6<br>(0.1–1.7)                   | 5.6<br>(3.1–9.1)               | 5.6<br>(3.1–9.1)               | 1.9<br>(0.8–3.1)               | 1.9<br>(0.8–3.1)               | 5.3<br>(2.9–8.0)               | 7.0<br>(4.1–10.3)              | 12.8<br>(5.7–18.7)              | 1.5<br>(0.0–4.3)               | <0.1<br>(<0.1–0.3)             | <0.1<br>(<0.1–0.3)             | 17.2<br>(7.2–31.3)                | 17.2<br>(7.2–31.3)                |
| Lithuania           | 25.7<br>(19.2–32.8)               | 2.5<br>(1.5–3.9)                | 0.2<br>(<0.1–0.5)                      | 0.3<br>(<0.1–0.7)                  | 4.5<br>(2.3–7.6)               | 4.5<br>(2.3–7.6)               | 1.9<br>(0.8–3.2)               | 1.9<br>(0.8–3.2)               | 4.5<br>(2.6–6.7)               | 5.9<br>(3.4–8.7)               | 15.4<br>(8.3–22.0)              | 2.6<br>(0.0–5.9)               | <0.1<br>(<0.1–0.2)             | <0.1<br>(<0.1–0.2)             | 19.1<br>(9.2–31.0)                | 19.1<br>(9.2–31.0)                |
| Republic of Moldova | 25.7<br>(19.9–31.8)               | 1.7<br>(1.0–2.6)                | 0.7<br>(0.2–1.6)                       | 1.1<br>(0.4–2.4)                   | 6.7<br>(3.3–11.9)              | 6.7<br>(3.4–11.9)              | 4.6<br>(1.9–7.4)               | 4.6<br>(1.9–7.4)               | 4.7<br>(3.0–6.7)               | 7.5<br>(4.8–10.6)              | 10.1<br>(3.6–16.3)              | 1.9<br>(0.0–4.8)               | <0.1<br>(<0.1–0.1)             | <0.1<br>(<0.1–0.1)             | 22.1<br>(13.3–30.8)               | 22.1<br>(13.3–30.8)               |
| Russian Federation  | 35.0<br>(28.1–41.7)               | 3.4<br>(2.2–4.8)                | 0.1<br>(<0.1–0.4)                      | 0.2<br>(<0.1–0.6)                  | 5.2<br>(2.6–9.2)               | 5.3<br>(2.6–9.2)               | 2.1<br>(0.9–3.5)               | 2.1<br>(0.9–3.4)               | 4.8<br>(2.8–6.9)               | 7.8<br>(4.8–11.1)              | 10.4<br>(4.9–15.4)              | 2.0<br>(0.3–4.1)               | <0.1<br>(<0.1–0.4)             | <0.1<br>(<0.1–0.4)             | 15.9<br>(<0.1–31.8)               | 15.8<br>(<0.1–31.8)               |
| Ukraine             | 30.6<br>(23.5–37.8)               | 1.7<br>(1.0–2.8)                | 0.4<br>(0.1–0.9)                       | 0.5<br>(0.2–1.3)                   | 7.1<br>(3.7–12.3)              | 7.1<br>(3.7–12.3)              | 3.1<br>(1.2–5.0)               | 3.1<br>(1.2–5.0)               | 5.0<br>(3.0–7.3)               | 8.3<br>(5.0–11.8)              | 6.6<br>(1.5–12.0)               | 0.9<br>(0.0–2.4)               | <0.1<br>(<0.1–0.2)             | <0.1<br>(<0.1–0.2)             | 19.7<br>(13.3–26.2)               | 19.7<br>(13.3–26.2)               |
| <b>High-income</b>  | <b>19.8</b><br><b>(15.1–24.7)</b> | <b>8.2</b><br><b>(5.8–10.9)</b> | <b>&lt;0.1</b><br><b>(&lt;0.1–0.1)</b> | <b>0.1</b><br><b>(&lt;0.1–0.2)</b> | <b>5.5</b><br><b>(3.0–8.9)</b> | <b>5.3</b><br><b>(2.9–8.6)</b> | <b>1.5</b><br><b>(0.6–2.4)</b> | <b>1.4</b><br><b>(0.6–2.3)</b> | <b>4.4</b><br><b>(2.6–6.4)</b> | <b>4.6</b><br><b>(2.7–6.7)</b> | <b>9.1</b><br><b>(3.8–13.7)</b> | <b>3.9</b><br><b>(1.1–6.9)</b> | <b>0.4</b><br><b>(0.1–0.7)</b> | <b>0.4</b><br><b>(0.2–0.7)</b> | <b>17.9</b><br><b>(13.7–22.7)</b> | <b>18.2</b><br><b>(13.7–23.4)</b> |

|                           | Smoking             |                    | Household air pollution |                     | Ambient particulate matter |                    | Handwashing      |                  | Secondhand smoke  |                   | Alcohol use        |                   | High temperature    |                     | Low temperature     |                     |
|---------------------------|---------------------|--------------------|-------------------------|---------------------|----------------------------|--------------------|------------------|------------------|-------------------|-------------------|--------------------|-------------------|---------------------|---------------------|---------------------|---------------------|
|                           | M                   | F                  | M                       | F                   | M                          | F                  | M                | F                | M                 | F                 | M                  | F                 | M                   | F                   | M                   | F                   |
| Australasia               | 8.0<br>(5.7–10.7)   | 7.3<br>(4.9–10.1)  | <0.1<br>(<0.1–<0.1)     | <0.1<br>(<0.1–0.1)  | 1.9<br>(0.4–4.1)           | 1.9<br>(0.4–4.1)   | 1.9<br>(0.8–3.2) | 1.9<br>(0.8–3.2) | 3.6<br>(2.0–5.5)  | 2.7<br>(1.5–4.1)  | 12.1<br>(5.1–18.2) | 4.3<br>(0.4–8.8)  | 6.0<br>(4.0–7.9)    | 6.0<br>(3.9–7.9)    | 8.5<br>(5.4–11.4)   | 8.5<br>(5.5–11.4)   |
| Australia                 | 7.4<br>(5.3–10.0)   | 7.3<br>(4.9–10.2)  | <0.1<br>(<0.1–<0.1)     | <0.1<br>(<0.1–0.1)  | 1.9<br>(0.5–4.3)           | 1.9<br>(0.5–4.3)   | 1.9<br>(0.8–3.2) | 1.9<br>(0.8–3.2) | 3.7<br>(2.0–5.6)  | 2.8<br>(1.5–4.2)  | 12.4<br>(5.3–18.6) | 4.3<br>(0.2–9.2)  | 7.3<br>(4.8–9.7)    | 7.3<br>(4.8–9.7)    | 5.9<br>(2.7–8.9)    | 5.9<br>(2.7–8.9)    |
| New Zealand               | 10.7<br>(7.1–14.8)  | 7.4<br>(4.8–10.3)  | <0.1<br>(<0.1–<0.1)     | <0.1<br>(<0.1–<0.1) | 1.5<br>(0.2–3.5)           | 1.5<br>(0.2–3.5)   | 1.9<br>(0.8–3.2) | 1.9<br>(0.8–3.2) | 3.5<br>(1.9–5.3)  | 2.3<br>(1.2–3.6)  | 10.8<br>(4.3–16.5) | 4.4<br>(0.3–8.4)  | <0.1<br>(<0.1–<0.1) | <0.1<br>(<0.1–<0.1) | 20.6<br>(13.5–28.1) | 20.6<br>(13.5–28.1) |
| High-income Asia Pacific  | 23.4<br>(17.8–29.1) | 4.3<br>(2.8–6.0)   | <0.1<br>(<0.1–<0.1)     | <0.1<br>(<0.1–0.1)  | 7.1<br>(3.9–11.5)          | 7.4<br>(4.1–11.9)  | 1.9<br>(0.7–3.1) | 1.9<br>(0.7–3.1) | 4.2<br>(2.4–6.3)  | 6.1<br>(3.6–8.8)  | 6.0<br>(1.2–11.2)  | 2.6<br>(0.3–5.6)  | 0.4<br>(<0.1–1.0)   | 0.4<br>(<0.1–1.1)   | 16.3<br>(13.1–19.8) | 16.3<br>(13.1–19.8) |
| Brunei Darussalam         | 24.2<br>(18.0–31.0) | 7.0<br>(4.4–10.2)  | <0.1<br>(<0.1–0.1)      | 0.1<br>(<0.1–0.2)   | 2.6<br>(0.8–5.4)           | 2.6<br>(0.8–5.4)   | 2.0<br>(0.8–3.2) | 2.0<br>(0.8–3.2) | 3.6<br>(2.1–5.4)  | 4.7<br>(2.7–7.0)  | 0.1<br>(0.0–0.7)   | <0.1<br>(0.0–0.2) | 0.9<br>(<0.1–5.8)   | 0.9<br>(<0.1–5.8)   | <0.1<br>(<0.1–0.5)  | <0.1<br>(<0.1–0.5)  |
| Japan                     | 23.0<br>(17.6–28.6) | 4.1<br>(2.6–5.8)   | <0.1<br>(<0.1–<0.1)     | <0.1<br>(<0.1–0.1)  | 6.3<br>(3.4–10.4)          | 6.3<br>(3.3–10.4)  | 1.9<br>(0.7–3.1) | 1.9<br>(0.7–3.1) | 4.3<br>(2.5–6.5)  | 6.2<br>(3.6–9.0)  | 5.6<br>(0.7–10.8)  | 2.3<br>(0.0–5.4)  | 0.4<br>(<0.1–1.0)   | 0.5<br>(<0.1–1.0)   | 16.3<br>(13.1–19.7) | 16.2<br>(13.1–19.7) |
| Republic of Korea         | 29.1<br>(22.1–35.8) | 5.7<br>(3.5–8.7)   | <0.1<br>(<0.1–<0.1)     | <0.1<br>(<0.1–<0.1) | 14.2<br>(8.6–21.1)         | 14.2<br>(8.6–21.1) | 1.9<br>(0.7–3.1) | 1.9<br>(0.7–3.1) | 3.5<br>(2.0–5.2)  | 6.0<br>(3.4–8.6)  | 11.5<br>(5.3–17.5) | 4.9<br>(1.5–9.3)  | 0.2<br>(<0.1–0.9)   | 0.2<br>(<0.1–0.9)   | 20.4<br>(14.7–25.9) | 20.4<br>(14.7–25.9) |
| Singapore                 | 14.4<br>(10.3–19.0) | 3.3<br>(1.8–5.4)   | <0.1<br>(<0.1–<0.1)     | <0.1<br>(<0.1–0.1)  | 9.5<br>(5.0–16.2)          | 9.5<br>(5.0–16.2)  | 1.9<br>(0.8–3.1) | 1.9<br>(0.8–3.1) | 2.8<br>(1.6–4.3)  | 3.2<br>(1.7–4.8)  | 0.9<br>(0.0–2.8)   | 0.2<br>(0.0–0.9)  | 1.3<br>(<0.1–11.7)  | 1.3<br>(<0.1–11.7)  | 0.1<br>(<0.1–1.2)   | 0.1<br>(<0.1–1.2)   |
| High-income North America | 17.0<br>(12.8–21.4) | 11.6<br>(8.4–15.0) | <0.1<br>(<0.1–<0.1)     | <0.1<br>(<0.1–<0.1) | 2.5<br>(1.1–4.9)           | 2.5<br>(1.1–4.9)   | 1.0<br>(0.4–1.6) | 1.0<br>(0.4–1.6) | 4.3<br>(2.7–6.2)  | 3.4<br>(2.1–4.8)  | 7.7<br>(3.1–11.8)  | 4.0<br>(1.3–7.0)  | 0.5<br>(0.2–0.9)    | 0.5<br>(0.2–0.8)    | 16.3<br>(11.8–21.2) | 16.4<br>(11.9–21.3) |
| Canada                    | 16.1<br>(12.0–20.6) | 10.5<br>(7.4–14.3) | <0.1<br>(<0.1–<0.1)     | <0.1<br>(<0.1–<0.1) | 2.2<br>(0.9–4.4)           | 2.2<br>(0.9–4.4)   | 1.0<br>(0.4–1.7) | 1.0<br>(0.4–1.7) | 4.3<br>(2.7–6.5)  | 3.3<br>(1.9–5.0)  | 8.1<br>(3.2–12.8)  | 3.8<br>(0.7–7.4)  | <0.1<br>(<0.1–0.3)  | <0.1<br>(<0.1–0.3)  | 20.8<br>(0.8–39.3)  | 20.8<br>(0.8–39.3)  |
| United States of America  | 17.1<br>(12.9–21.6) | 11.8<br>(8.5–15.2) | <0.1<br>(<0.1–<0.1)     | <0.1<br>(<0.1–<0.1) | 2.6<br>(1.1–4.9)           | 2.6<br>(1.1–4.9)   | 1.0<br>(0.4–1.6) | 1.0<br>(0.4–1.6) | 4.3<br>(2.6–6.3)  | 3.4<br>(2.1–4.8)  | 7.6<br>(3.2–11.9)  | 4.0<br>(1.3–7.2)  | 0.6<br>(0.3–1.0)    | 0.6<br>(0.3–0.9)    | 15.7<br>(12.1–19.7) | 15.8<br>(12.1–19.7) |
| Southern Latin America    | 14.2<br>(10.1–18.8) | 10.1<br>(7.0–13.4) | 0.3<br>(0.1–0.8)        | 0.5<br>(0.2–1.1)    | 7.0<br>(3.8–11.7)          | 7.0<br>(3.8–11.6)  | 2.4<br>(1.0–4.0) | 2.4<br>(1.0–4.0) | 7.8<br>(4.5–11.5) | 7.9<br>(4.4–11.5) | 11.3<br>(4.7–17.6) | 3.8<br>(0.7–7.2)  | 0.8<br>(0.5–1.2)    | 0.8<br>(0.5–1.2)    | 16.2<br>(10.3–22.7) | 16.1<br>(10.2–22.6) |
| Argentina                 | 15.2<br>(10.9–20.0) | 11.1<br>(7.7–14.8) | 0.3<br>(0.1–0.8)        | 0.4<br>(0.1–1.1)    | 6.5<br>(3.4–11.1)          | 6.5<br>(3.4–11.0)  | 2.5<br>(1.0–4.1) | 2.5<br>(1.0–4.1) | 7.7<br>(4.4–11.4) | 7.8<br>(4.3–11.5) | 11.5<br>(4.5–18.0) | 3.7<br>(0.6–7.2)  | 0.9<br>(0.5–1.4)    | 0.9<br>(0.5–1.4)    | 16.1<br>(10.5–22.4) | 16.1<br>(10.5–22.4) |
| Chile                     | 6.7<br>(4.2–9.7)    | 4.7<br>(3.0–7.0)   | 0.5<br>(0.1–1.3)        | 0.8<br>(0.2–2.1)    | 11.7<br>(7.1–18.0)         | 11.7<br>(7.1–17.9) | 2.0<br>(0.8–3.4) | 2.0<br>(0.8–3.4) | 8.2<br>(4.2–12.5) | 7.7<br>(3.9–11.9) | 10.4<br>(4.4–16.5) | 4.1<br>(0.9–7.9)  | <0.1<br>(<0.1–<0.1) | <0.1<br>(<0.1–<0.1) | 19.3<br>(10.4–29.4) | 19.3<br>(10.4–29.4) |
| Uruguay                   | 13.6<br>(9.9–17.7)  | 5.5<br>(3.5–7.7)   | 0.2<br>(0.1–0.6)        | 0.4<br>(0.1–0.9)    | 4.0<br>(1.7–7.6)           | 4.0<br>(1.8–7.6)   | 2.3<br>(0.9–3.7) | 2.3<br>(0.9–3.7) | 9.0<br>(5.3–13.1) | 9.2<br>(5.4–13.0) | 10.1<br>(4.1–16.0) | 4.3<br>(1.1–8.2)  | 0.1<br>(<0.1–0.3)   | 0.1<br>(<0.1–0.3)   | 8.0<br>(4.5–11.6)   | 8.0<br>(4.5–11.6)   |
| Western Europe            | 18.9<br>(14.5–23.9) | 8.9<br>(6.1–12.0)  | <0.1<br>(<0.1–<0.1)     | <0.1<br>(<0.1–0.1)  | 4.9<br>(2.7–8.1)           | 4.9<br>(2.7–8.1)   | 1.0<br>(0.4–1.7) | 1.0<br>(0.4–1.7) | 4.0<br>(2.3–5.9)  | 3.6<br>(2.1–5.2)  | 12.6<br>(6.4–18.0) | 4.8<br>(1.5–8.2)  | 0.1<br>(<0.1–0.2)   | 0.1<br>(<0.1–0.2)   | 21.2<br>(15.0–27.8) | 21.3<br>(15.1–28.1) |
| Andorra                   | 19.1<br>(13.4–24.8) | 6.5<br>(3.7–10.2)  | <0.1<br>(<0.1–<0.1)     | <0.1<br>(<0.1–<0.1) | 3.5<br>(1.7–6.3)           | 3.5<br>(1.7–6.3)   | 1.0<br>(0.4–1.6) | 1.0<br>(0.4–1.6) | 4.6<br>(2.6–6.7)  | 4.3<br>(2.5–6.3)  | 12.4<br>(5.2–18.4) | 4.4<br>(0.5–8.5)  | <0.1<br>(<0.1–<0.1) | <0.1<br>(<0.1–<0.1) | 17.0<br>(1.9–35.8)  | 17.0<br>(1.9–35.8)  |
| Austria                   | 22.4<br>(17.1–28.1) | 9.2<br>(6.3–12.6)  | <0.1<br>(<0.1–0.1)      | <0.1<br>(<0.1–0.1)  | 5.6<br>(3.1–9.1)           | 5.6<br>(3.1–9.1)   | 1.0<br>(0.4–1.6) | 1.0<br>(0.4–1.6) | 7.5<br>(4.7–10.6) | 5.3<br>(3.3–7.7)  | 14.1<br>(7.0–20.5) | 4.6<br>(0.6–9.0)  | <0.1<br>(<0.1–0.1)  | <0.1<br>(<0.1–0.1)  | 19.7<br>(10.6–31.5) | 19.7<br>(10.6–31.5) |



|             | Smoking             |                     | Household air pollution |                     | Ambient particulate matter |                    | Handwashing      |                  | Secondhand smoke |                   | Alcohol use         |                   | High temperature    |                     | Low temperature     |                     |
|-------------|---------------------|---------------------|-------------------------|---------------------|----------------------------|--------------------|------------------|------------------|------------------|-------------------|---------------------|-------------------|---------------------|---------------------|---------------------|---------------------|
|             | M                   | F                   | M                       | F                   | M                          | F                  | M                | F                | M                | F                 | M                   | F                 | M                   | F                   | M                   | F                   |
| Belgium     | 22.6<br>(17.4–27.9) | 9.5<br>(6.8–12.5)   | <0.1<br>(<0.1–<0.1)     | <0.1<br>(<0.1–<0.1) | 5.9<br>(3.4–9.7)           | 5.9<br>(3.4–9.7)   | 1.0<br>(0.4–1.6) | 1.0<br>(0.4–1.6) | 3.5<br>(2.0–4.9) | 4.6<br>(2.9–6.7)  | 13.1<br>(6.2–19.6)  | 7.1<br>(2.2–11.8) | <0.1<br>(<0.1–0.1)  | <0.1<br>(<0.1–0.1)  | 23.4<br>(14.7–32.7) | 23.4<br>(14.7–32.7) |
| Cyprus      | 28.6<br>(22.3–35.6) | 7.0<br>(4.4–10.1)   | <0.1<br>(<0.1–<0.1)     | <0.1<br>(<0.1–0.1)  | 7.7<br>(4.5–12.5)          | 7.7<br>(4.5–12.5)  | 1.0<br>(0.4–1.6) | 1.0<br>(0.4–1.6) | 4.2<br>(2.5–6.3) | 8.2<br>(4.9–11.5) | 13.1<br>(5.7–19.4)  | 1.9<br>(0.0–4.3)  | 2.1<br>(0.9–3.6)    | 2.1<br>(0.9–3.6)    | 4.5<br>(<0.1–10.9)  | 4.5<br>(<0.1–10.9)  |
| Denmark     | 28.3<br>(22.4–34.4) | 18.2<br>(13.1–23.5) | <0.1<br>(<0.1–<0.1)     | <0.1<br>(<0.1–<0.1) | 4.0<br>(2.1–7.2)           | 4.0<br>(2.1–7.2)   | 1.0<br>(0.4–1.6) | 1.0<br>(0.4–1.6) | 5.2<br>(3.1–7.5) | 3.3<br>(2.0–4.8)  | 11.4<br>(4.7–17.9)  | 6.3<br>(0.8–11.7) | <0.1<br>(<0.1–<0.1) | <0.1<br>(<0.1–<0.1) | 23.2<br>(13.0–34.4) | 23.2<br>(13.0–34.4) |
| Finland     | 15.1<br>(11.2–19.5) | 6.2<br>(4.1–8.8)    | <0.1<br>(<0.1–<0.1)     | <0.1<br>(<0.1–<0.1) | 1.2<br>(0.2–2.9)           | 1.2<br>(0.2–2.9)   | 1.0<br>(0.4–1.7) | 1.0<br>(0.4–1.7) | 3.2<br>(1.8–4.8) | 2.5<br>(1.4–3.8)  | 7.4<br>(2.2–13.0)   | 2.2<br>(0.0–5.4)  | <0.1<br>(<0.1–0.3)  | <0.1<br>(<0.1–0.3)  | 17.9<br>(3.8–36.4)  | 17.9<br>(3.8–36.4)  |
| France      | 16.3<br>(12.0–21.3) | 6.5<br>(4.0–9.4)    | <0.1<br>(<0.1–<0.1)     | <0.1<br>(<0.1–<0.1) | 5.1<br>(2.8–8.5)           | 5.1<br>(2.8–8.5)   | 1.0<br>(0.4–1.7) | 1.0<br>(0.4–1.7) | 2.6<br>(1.3–4.1) | 2.2<br>(1.2–3.3)  | 15.7<br>(7.5–22.9)  | 6.5<br>(1.6–11.6) | <0.1<br>(<0.1–0.1)  | <0.1<br>(<0.1–0.1)  | 21.7<br>(14.9–28.4) | 21.7<br>(14.9–28.4) |
| Germany     | 19.5<br>(14.5–24.7) | 9.1<br>(6.2–12.3)   | <0.1<br>(<0.1–<0.1)     | <0.1<br>(<0.1–<0.1) | 5.3<br>(3.0–8.8)           | 5.3<br>(3.0–8.8)   | 1.0<br>(0.4–1.6) | 1.0<br>(0.4–1.6) | 3.0<br>(1.7–4.4) | 2.4<br>(1.4–3.6)  | 17.4<br>(10.0–24.2) | 9.3<br>(4.1–14.6) | <0.1<br>(<0.1–0.2)  | <0.1<br>(<0.1–0.2)  | 22.5<br>(14.3–31.1) | 22.5<br>(14.3–31.1) |
| Greece      | 29.2<br>(22.9–35.9) | 9.5<br>(6.2–13.0)   | <0.1<br>(<0.1–0.1)      | 0.1<br>(<0.1–0.2)   | 6.9<br>(4.0–10.9)          | 6.9<br>(4.0–10.9)  | 1.0<br>(0.4–1.7) | 1.0<br>(0.4–1.7) | 6.2<br>(3.6–9.0) | 7.1<br>(4.3–10.2) | 12.4<br>(6.0–18.6)  | 0.9<br>(0.0–2.8)  | 0.1<br>(<0.1–0.3)   | 0.1<br>(<0.1–0.3)   | 15.7<br>(12.3–19.4) | 15.7<br>(12.3–19.4) |
| Iceland     | 17.8<br>(13.3–22.6) | 9.8<br>(6.7–13.6)   | <0.1<br>(<0.1–<0.1)     | <0.1<br>(<0.1–<0.1) | 1.2<br>(0.2–3.0)           | 1.2<br>(0.2–3.0)   | 1.0<br>(0.4–1.7) | 1.0<br>(0.4–1.7) | 5.5<br>(3.5–8.2) | 4.4<br>(2.8–6.4)  | 8.8<br>(2.9–14.7)   | 2.9<br>(0.0–6.8)  | <0.1<br>(0.0–0.0)   | <0.1<br>(0.0–0.0)   | 21.5<br>(5.1–38.7)  | 21.5<br>(5.1–38.7)  |
| Ireland     | 20.9<br>(15.7–26.4) | 13.0<br>(8.8–17.6)  | <0.1<br>(<0.1–<0.1)     | <0.1<br>(<0.1–<0.1) | 2.7<br>(1.2–5.1)           | 2.7<br>(1.2–5.1)   | 1.0<br>(0.4–1.6) | 1.0<br>(0.4–1.6) | 4.2<br>(2.3–6.4) | 3.7<br>(2.1–5.5)  | 11.8<br>(5.9–17.8)  | 4.5<br>(1.1–8.5)  | <0.1<br>(0.0–0.0)   | <0.1<br>(0.0–0.0)   | 25.7<br>(14.4–37.2) | 25.7<br>(14.4–37.2) |
| Israel      | 18.8<br>(14.3–23.6) | 7.8<br>(5.3–10.9)   | <0.1<br>(<0.1–<0.1)     | <0.1<br>(<0.1–0.1)  | 10.1<br>(6.1–15.3)         | 10.1<br>(6.1–15.3) | 1.0<br>(0.4–1.7) | 1.0<br>(0.4–1.7) | 4.0<br>(2.2–5.9) | 3.4<br>(1.9–5.1)  | 1.6<br>(0.0–4.4)    | 0.3<br>(0.0–1.3)  | 2.1<br>(0.8–3.9)    | 2.1<br>(0.8–3.9)    | 3.5<br>(<0.1–10.4)  | 3.5<br>(<0.1–10.4)  |
| Italy       | 19.5<br>(14.6–24.5) | 7.4<br>(4.8–10.5)   | <0.1<br>(<0.1–0.1)      | <0.1<br>(<0.1–0.1)  | 8.2<br>(4.9–12.5)          | 8.2<br>(4.9–12.5)  | 1.0<br>(0.4–1.7) | 1.0<br>(0.4–1.7) | 6.2<br>(3.7–9.0) | 4.0<br>(2.4–5.9)  | 12.2<br>(6.2–18.0)  | 4.4<br>(1.7–7.6)  | 0.1<br>(<0.1–0.2)   | 0.1<br>(<0.1–0.2)   | 17.9<br>(13.2–22.5) | 17.9<br>(13.2–22.5) |
| Luxembourg  | 20.6<br>(15.0–26.4) | 10.3<br>(6.8–14.6)  | <0.1<br>(<0.1–<0.1)     | <0.1<br>(<0.1–<0.1) | 4.2<br>(2.2–7.3)           | 4.2<br>(2.2–7.3)   | 1.0<br>(0.4–1.6) | 1.0<br>(0.4–1.6) | 3.8<br>(2.2–5.7) | 5.5<br>(3.4–7.9)  | 15.8<br>(8.2–22.6)  | 5.1<br>(0.6–9.8)  | <0.1<br>(<0.1–0.1)  | <0.1<br>(<0.1–0.1)  | 23.1<br>(13.3–33.6) | 23.1<br>(13.3–33.6) |
| Malta       | 17.0<br>(12.8–21.7) | 6.8<br>(4.6–9.6)    | <0.1<br>(<0.1–<0.1)     | <0.1<br>(<0.1–0.1)  | 6.1<br>(3.4–9.9)           | 6.1<br>(3.4–9.9)   | 1.0<br>(0.4–1.7) | 1.0<br>(0.4–1.7) | 4.8<br>(2.9–7.1) | 4.5<br>(2.8–6.5)  | 9.1<br>(3.5–14.3)   | 2.7<br>(0.2–5.5)  | 0.3<br>(<0.1–0.9)   | 0.3<br>(<0.1–0.9)   | 3.6<br>(<0.1–15.0)  | 3.6<br>(<0.1–15.0)  |
| Monaco      | 19.0<br>(13.1–24.8) | 7.6<br>(4.4–11.5)   | <0.1<br>(<0.1–<0.1)     | <0.1<br>(<0.1–<0.1) | 5.3<br>(2.5–9.2)           | 5.3<br>(2.5–9.2)   | 1.0<br>(0.4–1.6) | 1.0<br>(0.4–1.6) | 4.8<br>(2.9–7.0) | 4.3<br>(2.6–6.3)  | 6.7<br>(0.0–18.0)   | 2.3<br>(0.0–7.7)  | <0.1<br>(<0.1–0.1)  | <0.1<br>(<0.1–0.1)  | 15.4<br>(11.9–19.0) | 15.4<br>(11.9–19.0) |
| Netherlands | 21.0<br>(15.5–26.6) | 12.1<br>(7.8–16.7)  | <0.1<br>(<0.1–<0.1)     | <0.1<br>(<0.1–<0.1) | 5.5<br>(3.1–9.0)           | 5.5<br>(3.1–9.0)   | 1.0<br>(0.4–1.6) | 1.0<br>(0.4–1.6) | 4.1<br>(2.4–6.1) | 3.3<br>(1.9–4.9)  | 11.5<br>(4.6–17.3)  | 5.3<br>(0.8–9.8)  | <0.1<br>(<0.1–0.1)  | <0.1<br>(<0.1–0.1)  | 23.6<br>(13.4–33.5) | 23.6<br>(13.4–33.5) |
| Norway      | 10.3<br>(7.4–13.6)  | 5.2<br>(3.2–7.9)    | <0.1<br>(<0.1–<0.1)     | <0.1<br>(<0.1–<0.1) | 1.7<br>(0.6–3.8)           | 1.8<br>(0.6–3.8)   | 1.0<br>(0.4–1.6) | 1.0<br>(0.4–1.6) | 4.0<br>(2.3–5.9) | 3.2<br>(1.8–4.6)  | 7.4<br>(1.7–13.0)   | 2.6<br>(0.0–6.2)  | <0.1<br>(<0.1–0.1)  | <0.1<br>(<0.1–0.1)  | 19.1<br>(5.7–36.0)  | 19.1<br>(5.8–36.0)  |
| Portugal    | 14.3<br>(10.2–19.0) | 1.7<br>(1.0–2.7)    | <0.1<br>(<0.1–0.1)      | 0.1<br>(<0.1–0.2)   | 3.0<br>(1.4–5.5)           | 3.0<br>(1.4–5.5)   | 1.1<br>(0.4–1.8) | 1.1<br>(0.4–1.8) | 4.2<br>(2.3–6.3) | 5.7<br>(3.1–8.5)  | 15.0<br>(7.8–21.1)  | 3.2<br>(1.1–5.7)  | 0.2<br>(<0.1–0.3)   | 0.2<br>(<0.1–0.3)   | 15.3<br>(11.7–19.2) | 15.3<br>(11.7–19.2) |
| San Marino  | 17.4<br>(12.5–22.9) | 6.7<br>(4.1–10.0)   | <0.1<br>(<0.1–<0.1)     | <0.1<br>(<0.1–<0.1) | 4.1<br>(1.5–7.9)           | 4.1<br>(1.5–7.9)   | 1.0<br>(0.4–1.7) | 1.0<br>(0.4–1.7) | 5.2<br>(3.2–7.8) | 4.6<br>(2.8–6.7)  | 11.7<br>(0.0–20.7)  | 4.5<br>(0.0–10.2) | 0.1<br>(<0.1–0.2)   | 0.1<br>(<0.1–0.2)   | 15.7<br>(12.5–19.0) | 15.7<br>(12.5–19.0) |

|                                     | Smoking                     |                          | Household air pollution  |                          | Ambient particulate matter |                           | Handwashing               |                           | Secondhand smoke         |                          | Alcohol use              |                          | High temperature             |                              | Low temperature          |                          |
|-------------------------------------|-----------------------------|--------------------------|--------------------------|--------------------------|----------------------------|---------------------------|---------------------------|---------------------------|--------------------------|--------------------------|--------------------------|--------------------------|------------------------------|------------------------------|--------------------------|--------------------------|
|                                     | M                           | F                        | M                        | F                        | M                          | F                         | M                         | F                         | M                        | F                        | M                        | F                        | M                            | F                            | M                        | F                        |
| Spain                               | 20.8<br>(15.5–26.8)         | 3.0<br>(1.7–4.5)         | 0.1<br>(<0.1–0.2)        | 0.1<br>(<0.1–0.3)        | 4.0<br>(2.1–6.9)           | 4.0<br>(2.1–6.9)          | 1.0<br>(0.4–1.7)          | 1.0<br>(0.4–1.7)          | 4.8<br>(2.7–7.2)         | 4.6<br>(2.8–6.7)         | 10.3<br>(4.5–16.1)       | 2.9<br>(0.8–5.3)         | 0.2<br>(<0.1–0.5)            | 0.2<br>(<0.1–0.5)            | 17.3<br>(13.3–21.5)      | 17.3<br>(13.3–21.5)      |
| Sweden                              | 17.9<br>(13.4–22.8)         | 12.8<br>(9.1–16.7)       | <0.1<br>(<0.1–<0.1)      | <0.1<br>(<0.1–<0.1)      | 1.2<br>(0.3–3.0)           | 1.2<br>(0.3–3.0)          | 1.0<br>(0.4–1.7)          | 1.0<br>(0.4–1.7)          | 4.5<br>(2.7–6.5)         | 1.9<br>(1.2–2.8)         | 10.4<br>(4.2–16.4)       | 7.4<br>(2.2–12.7)        | <0.1<br>(<0.1–0.1)           | <0.1<br>(<0.1–0.1)           | 18.5<br>(5.2–33.0)       | 18.5<br>(5.2–33.1)       |
| Switzerland                         | 21.4<br>(16.1–27.3)         | 9.6<br>(6.3–13.3)        | <0.1<br>(<0.1–<0.1)      | <0.1<br>(<0.1–<0.1)      | 4.1<br>(2.2–7.0)           | 4.1<br>(2.2–7.0)          | 1.0<br>(0.4–1.6)          | 1.0<br>(0.4–1.6)          | 4.1<br>(2.3–6.1)         | 3.6<br>(2.1–5.4)         | 13.3<br>(5.8–20.0)       | 7.6<br>(1.9–13.1)        | <0.1<br>(<0.1–<0.1)          | <0.1<br>(<0.1–<0.1)          | 21.1<br>(11.3–32.9)      | 21.1<br>(11.3–32.9)      |
| United Kingdom                      | 17.1<br>(12.8–22.1)         | 12.3<br>(8.3–16.6)       | <0.1<br>(<0.1–<0.1)      | <0.1<br>(<0.1–<0.1)      | 4.1<br>(2.1–7.1)           | 4.1<br>(2.1–7.1)          | 1.0<br>(0.4–1.7)          | 1.0<br>(0.4–1.7)          | 4.1<br>(2.3–6.1)         | 3.6<br>(2.0–5.3)         | 9.4<br>(3.5–15.6)        | 2.9<br>(0.0–6.7)         | <0.1<br>(<0.1–<0.1)          | <0.1<br>(<0.1–<0.1)          | 24.9<br>(15.8–35.0)      | 24.9<br>(15.7–34.9)      |
| <b>Latin America and Caribbean</b>  | <b>14.8<br/>(10.7–19.2)</b> | <b>6.1<br/>(4.0–8.3)</b> | <b>2.9<br/>(1.3–5.2)</b> | <b>3.8<br/>(2.0–6.3)</b> | <b>8.6<br/>(5.4–13.0)</b>  | <b>8.3<br/>(5.3–12.4)</b> | <b>6.6<br/>(2.7–10.5)</b> | <b>6.6<br/>(2.7–10.4)</b> | <b>4.8<br/>(2.7–7.3)</b> | <b>5.0<br/>(2.8–7.3)</b> | <b>4.2<br/>(1.6–7.0)</b> | <b>0.7<br/>(0.0–1.7)</b> | <b>1.4<br/>(&lt;0.1–4.1)</b> | <b>1.4<br/>(&lt;0.1–4.4)</b> | <b>3.1<br/>(1.4–4.9)</b> | <b>3.0<br/>(1.2–4.8)</b> |
| Andean Latin America                | 7.5<br>(4.9–10.4)           | 1.3<br>(0.6–2.1)         | 3.3<br>(1.3–6.4)         | 5.0<br>(2.3–9.0)         | 13.9<br>(8.6–21.1)         | 13.5<br>(8.5–20.2)        | 7.8<br>(3.2–12.4)         | 7.8<br>(3.2–12.4)         | 1.9<br>(0.7–3.5)         | 1.8<br>(0.7–3.4)         | 2.0<br>(0.0–4.8)         | 0.3<br>(0.0–1.4)         | 0.4<br>(<0.1–1.3)            | 0.5<br>(<0.1–1.3)            | 9.4<br>(5.8–13.3)        | 9.4<br>(5.8–13.3)        |
| Bolivia<br>(Plurinational State of) | 10.7<br>(7.2–14.7)          | 1.4<br>(0.5–2.5)         | 6.0<br>(2.5–11.7)        | 8.7<br>(4.1–15.1)        | 12.9<br>(7.4–20.6)         | 12.3<br>(7.2–19.3)        | 8.4<br>(3.5–13.2)         | 8.4<br>(3.5–13.2)         | 1.5<br>(0.5–2.9)         | 1.5<br>(0.5–2.9)         | 1.9<br>(0.0–5.2)         | 0.3<br>(0.0–1.4)         | 1.5<br>(0.5–2.7)             | 1.5<br>(0.5–2.7)             | 9.1<br>(5.9–12.6)        | 9.1<br>(5.9–12.6)        |
| Ecuador                             | 10.9<br>(6.9–15.3)          | 2.0<br>(1.0–3.3)         | 0.9<br>(0.3–2.1)         | 1.4<br>(0.5–3.2)         | 10.2<br>(5.4–16.6)         | 10.2<br>(5.5–16.4)        | 6.9<br>(2.8–11.0)         | 6.9<br>(2.8–11.0)         | 1.8<br>(0.6–3.5)         | 1.7<br>(0.6–3.2)         | 1.7<br>(0.0–3.6)         | 0.2<br>(0.0–0.9)         | 0.3<br>(<0.1–1.2)            | 0.3<br>(<0.1–1.2)            | 5.8<br>(3.6–8.1)         | 5.8<br>(3.6–8.1)         |
| Peru                                | 5.8<br>(3.6–8.2)            | 1.1<br>(0.5–1.8)         | 3.3<br>(1.3–6.5)         | 5.0<br>(2.2–8.9)         | 15.2<br>(9.3–23.1)         | 14.8<br>(9.3–22.2)        | 7.9<br>(3.3–12.5)         | 7.9<br>(3.3–12.5)         | 2.0<br>(0.7–3.7)         | 1.9<br>(0.7–3.6)         | 2.1<br>(0.0–5.1)         | 0.4<br>(0.0–1.6)         | 0.2<br>(<0.1–0.9)            | 0.2<br>(<0.1–0.9)            | 10.4<br>(6.0–15.2)       | 10.4<br>(6.0–15.2)       |
| Caribbean                           | 18.9<br>(13.8–24.2)         | 7.0<br>(4.6–9.9)         | 5.0<br>(2.5–8.2)         | 6.6<br>(3.7–10.1)        | 7.9<br>(3.6–14.6)          | 7.6<br>(3.6–13.9)         | 9.2<br>(4.0–14.5)         | 9.5<br>(4.1–14.8)         | 5.3<br>(3.1–7.8)         | 5.2<br>(3.0–7.5)         | 4.6<br>(1.6–7.5)         | 0.7<br>(<0.1–1.5)        | 1.2<br>(<0.1–3.3)            | 1.2<br>(<0.1–3.3)            | 0.1<br>(<0.1–1.4)        | 0.1<br>(<0.1–1.4)        |
| Antigua and Barbuda                 | 10.2<br>(7.0–13.9)          | 3.3<br>(2.0–5.0)         | 0.1<br>(<0.1–0.3)        | 0.2<br>(<0.1–0.4)        | 8.7<br>(2.7–18.4)          | 8.7<br>(2.7–18.4)         | 7.5<br>(3.1–11.9)         | 7.5<br>(3.1–11.9)         | 4.8<br>(2.7–7.0)         | 4.0<br>(2.3–6.0)         | 4.7<br>(1.4–8.1)         | 0.8<br>(0.0–1.7)         | 0.4<br>(<0.1–2.3)            | 0.4<br>(<0.1–2.3)            | 0.3<br>(<0.1–1.7)        | 0.3<br>(<0.1–1.7)        |
| Bahamas                             | 9.7<br>(6.6–13.1)           | 2.8<br>(1.6–4.2)         | 0.1<br>(<0.1–0.4)        | 0.2<br>(<0.1–0.5)        | 7.6<br>(1.7–16.5)          | 7.6<br>(1.7–16.4)         | 6.3<br>(2.6–10.2)         | 6.3<br>(2.6–10.2)         | 5.0<br>(2.9–7.3)         | 4.8<br>(2.8–7.0)         | 3.7<br>(0.0–8.0)         | 0.6<br>(0.0–1.8)         | 1.6<br>(<0.1–4.5)            | 1.6<br>(<0.1–4.5)            | 0.3<br>(<0.1–2.0)        | 0.3<br>(<0.1–2.0)        |
| Barbados                            | 13.1<br>(9.1–17.5)          | 0.9<br>(0.5–1.3)         | <0.1<br>(<0.1–<0.1)      | <0.1<br>(<0.1–<0.1)      | 10.8<br>(3.8–21.4)         | 10.8<br>(3.8–21.4)        | 7.1<br>(2.9–11.4)         | 7.1<br>(2.9–11.4)         | 2.8<br>(1.5–4.2)         | 2.7<br>(1.5–4.0)         | 8.1<br>(4.1–12.1)        | 0.8<br>(0.0–2.1)         | 1.2<br>(<0.1–3.9)            | 1.2<br>(<0.1–3.9)            | 0.4<br>(<0.1–2.0)        | 0.4<br>(<0.1–2.0)        |
| Belize                              | 15.0<br>(10.1–20.1)         | 2.5<br>(1.4–3.9)         | 2.7<br>(1.0–5.7)         | 4.1<br>(1.7–7.9)         | 10.6<br>(3.3–20.9)         | 10.4<br>(3.6–20.5)        | 9.5<br>(4.0–15.0)         | 9.5<br>(4.0–15.0)         | 3.9<br>(2.1–6.0)         | 4.8<br>(2.6–7.2)         | 4.8<br>(2.0–7.8)         | 0.3<br>(<0.1–0.7)        | 1.7<br>(<0.1–4.2)            | 1.7<br>(<0.1–4.2)            | 0.1<br>(<0.1–1.3)        | 0.1<br>(<0.1–1.3)        |
| Cuba                                | 23.8<br>(17.7–30.4)         | 8.3<br>(5.2–12.4)        | 0.2<br>(0.1–0.6)         | 0.4<br>(0.1–0.9)         | 8.8<br>(3.7–16.9)          | 8.8<br>(3.7–16.9)         | 6.0<br>(2.5–9.6)          | 6.0<br>(2.5–9.6)          | 6.4<br>(3.9–9.3)         | 6.5<br>(3.8–9.5)         | 4.3<br>(1.2–7.5)         | 0.7<br>(0.0–1.6)         | 1.5<br>(<0.1–4.0)            | 1.5<br>(<0.1–4.0)            | 0.2<br>(<0.1–1.6)        | 0.2<br>(<0.1–1.6)        |
| Dominica                            | 9.3<br>(6.0–12.7)           | 2.3<br>(1.3–3.6)         | 1.0<br>(0.3–2.3)         | 1.5<br>(0.4–3.4)         | 9.4<br>(3.2–19.0)          | 9.4<br>(3.3–18.9)         | 8.3<br>(3.5–13.2)         | 8.3<br>(3.5–13.2)         | 3.7<br>(1.9–5.7)         | 3.5<br>(1.8–5.3)         | 5.9<br>(2.2–9.6)         | 1.1<br>(0.1–2.3)         | 1.1<br>(<0.1–3.5)            | 1.1<br>(<0.1–3.5)            | 0.3<br>(<0.1–3.2)        | 0.3<br>(<0.1–3.2)        |
| Dominican Republic                  | 21.7<br>(15.8–28.0)         | 14.4<br>(9.1–19.9)       | 1.8<br>(0.6–4.0)         | 2.7<br>(1.0–5.6)         | 8.9<br>(3.3–17.9)          | 8.8<br>(3.4–17.7)         | 16.0<br>(7.1–24.3)        | 16.0<br>(7.1–24.3)        | 5.1<br>(2.9–7.5)         | 4.3<br>(2.5–6.4)         | 3.9<br>(1.3–6.6)         | 0.5<br>(0.0–1.2)         | 0.6<br>(<0.1–2.2)            | 0.6<br>(<0.1–2.2)            | <0.1<br>(<0.1–1.7)       | <0.1<br>(<0.1–1.7)       |
| Grenada                             | 10.9<br>(7.1–15.2)          | 2.3<br>(1.3–3.6)         | 0.4<br>(0.1–0.9)         | 0.6<br>(0.2–1.4)         | 10.8<br>(3.4–21.5)         | 10.8<br>(3.5–21.4)        | 7.6<br>(3.2–12.2)         | 7.6<br>(3.2–12.2)         | 3.4<br>(1.6–5.5)         | 3.4<br>(1.6–5.5)         | 7.9<br>(3.6–12.1)        | 1.5<br>(0.3–2.8)         | 1.4<br>(<0.1–4.2)            | 1.4<br>(<0.1–4.2)            | 0.3<br>(<0.1–1.8)        | 0.3<br>(<0.1–1.8)        |

|                                    | Smoking             |                  | Household air pollution |                     | Ambient particulate matter |                    | Handwashing        |                    | Secondhand smoke |                   | Alcohol use       |                   | High temperature  |                   | Low temperature    |                    |
|------------------------------------|---------------------|------------------|-------------------------|---------------------|----------------------------|--------------------|--------------------|--------------------|------------------|-------------------|-------------------|-------------------|-------------------|-------------------|--------------------|--------------------|
|                                    | M                   | F                | M                       | F                   | M                          | F                  | M                  | F                  | M                | F                 | M                 | F                 | M                 | F                 | M                  | F                  |
| Guyana                             | 9.7<br>(6.2–13.4)   | 2.6<br>(1.3–4.2) | 1.1<br>(0.4–2.3)        | 1.6<br>(0.6–3.3)    | 10.1<br>(3.2–20.5)         | 10.0<br>(3.2–20.3) | 14.1<br>(6.1–21.9) | 14.1<br>(6.1–21.9) | 4.5<br>(2.2–6.9) | 5.0<br>(2.5–7.7)  | 7.3<br>(3.0–11.6) | 0.2<br>(0.0–0.9)  | 0.9<br>(<0.1–2.8) | 0.9<br>(<0.1–2.8) | <0.1<br>(<0.1–1.3) | <0.1<br>(<0.1–1.3) |
| Haiti                              | 4.5<br>(2.5–6.9)    | 1.7<br>(0.9–2.8) | 33.4<br>(19.8–47.8)     | 41.2<br>(27.9–53.7) | 6.3<br>(2.7–12.2)          | 5.1<br>(2.2–9.8)   | 19.5<br>(8.7–29.2) | 19.5<br>(8.7–29.2) | 2.3<br>(1.0–3.8) | 2.3<br>(1.1–3.8)  | 6.1<br>(2.6–9.9)  | 1.0<br>(0.2–2.0)  | 0.8<br>(<0.1–3.0) | 0.8<br>(<0.1–3.0) | <0.1<br>(<0.1–1.3) | <0.1<br>(<0.1–1.3) |
| Jamaica                            | 14.0<br>(9.9–18.5)  | 4.0<br>(2.4–6.2) | 1.3<br>(0.4–3.0)        | 2.0<br>(0.7–4.4)    | 7.7<br>(3.9–13.2)          | 7.7<br>(4.0–13.0)  | 11.2<br>(4.8–17.4) | 11.2<br>(4.8–17.4) | 5.0<br>(2.8–7.5) | 5.4<br>(3.1–7.9)  | 3.0<br>(0.4–5.8)  | 0.4<br>(0.0–1.2)  | 1.2<br>(<0.1–4.3) | 1.2<br>(<0.1–4.3) | 0.1<br>(<0.1–1.1)  | 0.1<br>(<0.1–1.1)  |
| Saint Kitts and Nevis              | 8.3<br>(5.5–11.7)   | 2.3<br>(1.3–3.4) | 0.2<br>(<0.1–0.6)       | 0.4<br>(0.1–1.0)    | 3.5<br>(1.3–6.7)           | 3.5<br>(1.4–6.7)   | 7.6<br>(3.2–12.1)  | 7.6<br>(3.2–12.1)  | 4.7<br>(2.6–7.2) | 4.4<br>(2.4–6.7)  | 2.2<br>(0.0–8.1)  | 0.4<br>(0.0–1.6)  | 1.0<br>(<0.1–3.9) | 1.0<br>(<0.1–3.9) | 0.4<br>(<0.1–2.3)  | 0.4<br>(<0.1–2.3)  |
| Saint Lucia                        | 11.6<br>(8.0–15.8)  | 2.8<br>(1.6–4.4) | 0.5<br>(0.1–1.1)        | 0.7<br>(0.3–1.6)    | 10.7<br>(3.6–21.1)         | 10.7<br>(3.8–21.0) | 5.7<br>(2.3–9.2)   | 5.7<br>(2.3–9.2)   | 3.0<br>(1.6–4.7) | 3.0<br>(1.6–4.6)  | 7.4<br>(3.6–11.7) | 1.4<br>(0.1–3.0)  | 1.7<br>(<0.1–4.8) | 1.7<br>(<0.1–4.8) | 0.3<br>(<0.1–1.9)  | 0.3<br>(<0.1–1.9)  |
| Saint Vincent and the Grenadines   | 10.1<br>(6.4–14.1)  | 2.5<br>(1.4–3.9) | 0.6<br>(0.2–1.4)        | 0.9<br>(0.3–2.0)    | 10.6<br>(3.3–21.3)         | 10.6<br>(3.4–21.1) | 9.1<br>(3.8–14.3)  | 9.1<br>(3.8–14.3)  | 3.8<br>(2.0–6.2) | 4.0<br>(2.1–6.2)  | 6.5<br>(2.8–10.3) | 1.2<br>(0.3–2.5)  | 1.3<br>(<0.1–4.0) | 1.3<br>(<0.1–4.0) | 0.4<br>(<0.1–2.0)  | 0.4<br>(<0.1–2.0)  |
| Suriname                           | 19.6<br>(13.8–25.9) | 4.8<br>(2.7–7.2) | 1.5<br>(0.5–3.6)        | 2.3<br>(0.8–5.1)    | 10.7<br>(4.1–20.6)         | 10.6<br>(4.2–20.4) | 9.3<br>(3.9–14.9)  | 9.3<br>(3.9–14.9)  | 6.5<br>(3.5–9.7) | 7.7<br>(4.4–11.4) | 4.7<br>(1.5–8.3)  | 0.8<br>(0.0–1.8)  | 1.0<br>(<0.1–3.0) | 1.0<br>(<0.1–3.0) | 0.3<br>(<0.1–1.6)  | 0.3<br>(<0.1–1.6)  |
| Trinidad and Tobago                | 13.9<br>(9.5–18.8)  | 3.1<br>(1.7–4.9) | <0.1<br>(<0.1–<0.1)     | <0.1<br>(<0.1–0.1)  | 11.0<br>(3.1–22.8)         | 11.0<br>(3.1–22.8) | 6.8<br>(2.8–10.9)  | 6.8<br>(2.8–10.9)  | 4.9<br>(2.5–7.6) | 6.0<br>(3.1–9.2)  | 5.2<br>(1.5–8.8)  | 1.2<br>(0.0–2.8)  | 0.4<br>(<0.1–2.6) | 0.4<br>(<0.1–2.6) | 0.2<br>(<0.1–1.2)  | 0.2<br>(<0.1–1.2)  |
| Central Latin America              | 13.6<br>(9.1–18.2)  | 4.0<br>(2.4–5.7) | 4.6<br>(2.1–8.0)        | 5.9<br>(3.2–9.6)    | 10.7<br>(6.9–15.7)         | 10.4<br>(6.8–15.3) | 6.0<br>(2.5–9.7)   | 6.0<br>(2.5–9.7)   | 3.4<br>(1.4–5.9) | 3.1<br>(1.3–5.4)  | 3.9<br>(1.6–6.1)  | 0.6<br>(0.0–1.3)  | 1.3<br>(<0.1–3.3) | 1.2<br>(<0.1–3.3) | 3.8<br>(1.8–5.8)   | 3.9<br>(2.0–6.0)   |
| Colombia                           | 8.1<br>(5.3–11.3)   | 4.0<br>(2.3–6.2) | 1.7<br>(0.6–3.8)        | 2.6<br>(1.0–5.3)    | 11.2<br>(6.4–17.6)         | 11.1<br>(6.5–17.4) | 6.1<br>(2.5–9.9)   | 6.1<br>(2.5–9.9)   | 5.0<br>(2.4–8.2) | 4.0<br>(1.9–6.6)  | 2.5<br>(0.4–4.8)  | 0.2<br>(0.0–0.8)  | 1.0<br>(<0.1–3.4) | 1.0<br>(<0.1–3.4) | 3.4<br>(1.8–5.1)   | 3.4<br>(1.8–5.1)   |
| Costa Rica                         | 13.5<br>(9.5–17.8)  | 4.9<br>(3.0–7.3) | 0.8<br>(0.2–1.9)        | 1.2<br>(0.4–2.8)    | 8.9<br>(5.2–13.8)          | 8.8<br>(5.2–13.7)  | 6.8<br>(2.8–10.9)  | 6.8<br>(2.8–10.9)  | 5.3<br>(2.8–7.9) | 5.0<br>(2.8–7.7)  | 3.2<br>(0.4–6.5)  | 0.3<br>(0.0–1.2)  | 0.3<br>(<0.1–2.2) | 0.3<br>(<0.1–2.2) | 0.6<br>(<0.1–2.7)  | 0.6<br>(<0.1–2.7)  |
| El Salvador                        | 7.1<br>(4.9–9.7)    | 2.3<br>(1.3–3.6) | 2.9<br>(1.2–5.7)        | 4.3<br>(2.0–7.6)    | 11.3<br>(5.9–18.3)         | 11.0<br>(6.0–17.6) | 9.0<br>(3.8–14.4)  | 9.0<br>(3.8–14.4)  | 3.3<br>(1.7–5.3) | 2.4<br>(1.2–3.8)  | 1.9<br>(0.1–3.9)  | 0.3<br>(0.0–1.0)  | 1.4<br>(<0.1–6.7) | 1.4<br>(<0.1–6.7) | <0.1<br>(<0.1–0.6) | <0.1<br>(<0.1–0.6) |
| Guatemala                          | 13.2<br>(8.4–18.8)  | 2.6<br>(1.4–4.0) | 13.8<br>(6.3–24.3)      | 19.0<br>(10.1–30.7) | 12.0<br>(7.5–17.9)         | 10.9<br>(6.7–16.0) | 7.6<br>(3.2–12.1)  | 7.6<br>(3.2–12.1)  | 2.6<br>(1.0–4.6) | 2.3<br>(0.9–4.1)  | 0.9<br>(0.0–2.3)  | 0.2<br>(0.0–0.6)  | 1.7<br>(0.5–3.5)  | 1.7<br>(0.5–3.5)  | 1.5<br>(<0.1–3.2)  | 1.5<br>(<0.1–3.2)  |
| Honduras                           | 18.7<br>(12.9–24.7) | 3.3<br>(1.8–5.5) | 17.3<br>(8.9–28.3)      | 23.3<br>(13.4–34.7) | 9.6<br>(6.0–14.5)          | 8.5<br>(5.3–12.7)  | 5.4<br>(2.2–8.6)   | 5.4<br>(2.2–8.6)   | 5.5<br>(2.9–8.4) | 5.5<br>(2.9–8.3)  | 3.1<br>(1.1–5.1)  | 0.3<br>(0.0–0.7)  | 0.7<br>(<0.1–2.6) | 0.7<br>(<0.1–2.6) | <0.1<br>(<0.1–2.4) | <0.1<br>(<0.1–2.4) |
| Mexico                             | 16.2<br>(10.6–21.8) | 4.6<br>(2.5–6.7) | 2.6<br>(1.1–4.9)        | 3.4<br>(1.6–6.2)    | 10.1<br>(6.2–15.3)         | 10.0<br>(6.3–15.0) | 5.0<br>(2.0–8.1)   | 5.0<br>(2.0–8.0)   | 2.4<br>(0.7–4.9) | 2.3<br>(0.6–4.5)  | 5.8<br>(2.9–8.9)  | 1.0<br>(<0.1–2.0) | 1.3<br>(0.4–2.2)  | 1.2<br>(0.4–2.1)  | 6.8<br>(4.1–9.7)   | 7.3<br>(4.4–10.2)  |
| Nicaragua                          | 14.9<br>(10.2–20.2) | 1.2<br>(0.7–1.9) | 13.4<br>(5.9–23.7)      | 18.5<br>(9.8–29.4)  | 9.2<br>(5.4–14.8)          | 8.4<br>(4.9–13.5)  | 8.1<br>(3.4–12.8)  | 8.1<br>(3.4–12.8)  | 4.5<br>(2.2–7.2) | 4.6<br>(2.2–7.3)  | 3.8<br>(1.5–6.1)  | 0.4<br>(0.0–1.1)  | 0.8<br>(<0.1–4.9) | 0.8<br>(<0.1–4.9) | <0.1<br>(<0.1–1.1) | <0.1<br>(<0.1–1.1) |
| Panama                             | 10.6<br>(7.3–14.1)  | 4.1<br>(2.4–6.2) | 1.3<br>(0.4–2.7)        | 1.9<br>(0.6–4.1)    | 6.5<br>(3.2–10.9)          | 6.5<br>(3.3–10.9)  | 6.1<br>(2.5–9.8)   | 6.1<br>(2.5–9.8)   | 3.9<br>(2.1–5.8) | 3.2<br>(1.8–4.9)  | 5.2<br>(2.2–8.5)  | 0.8<br>(0.0–1.8)  | 0.6<br>(<0.1–2.3) | 0.6<br>(<0.1–2.3) | <0.1<br>(<0.1–1.0) | <0.1<br>(<0.1–1.0) |
| Venezuela (Bolivarian Republic of) | 14.0<br>(9.3–19.4)  | 5.2<br>(3.0–7.9) | 0.1<br>(<0.1–0.2)       | 0.1<br>(<0.1–0.2)   | 11.1<br>(5.9–18.6)         | 11.1<br>(5.9–18.6) | 5.7<br>(2.4–9.2)   | 5.7<br>(2.4–9.2)   | 5.4<br>(2.4–8.8) | 5.3<br>(2.4–8.6)  | 4.5<br>(1.8–7.6)  | 0.7<br>(0.0–1.7)  | 1.2<br>(<0.1–9.4) | 1.2<br>(<0.1–9.4) | 0.1<br>(<0.1–1.7)  | 0.1<br>(<0.1–1.7)  |

|                                     | Smoking                     |                          | Household air pollution  |                          | Ambient particulate matter  |                             | Handwashing               |                           | Secondhand smoke          |                            | Alcohol use              |                          | High temperature         |                          | Low temperature           |                           |
|-------------------------------------|-----------------------------|--------------------------|--------------------------|--------------------------|-----------------------------|-----------------------------|---------------------------|---------------------------|---------------------------|----------------------------|--------------------------|--------------------------|--------------------------|--------------------------|---------------------------|---------------------------|
|                                     | M                           | F                        | M                        | F                        | M                           | F                           | M                         | F                         | M                         | F                          | M                        | F                        | M                        | F                        | M                         | F                         |
| Tropical Latin America              | 17.3<br>(12.6–22.2)         | 8.2<br>(5.6–11.3)        | 1.4<br>(0.5–3.2)         | 2.1<br>(0.8–4.0)         | 5.8<br>(3.3–9.4)            | 5.8<br>(3.4–9.3)            | 6.0<br>(2.4–9.7)          | 5.9<br>(2.4–9.6)          | 6.6<br>(3.9–9.9)          | 6.8<br>(4.0–9.8)           | 5.1<br>(1.9–8.2)         | 0.9<br>(0.0–2.0)         | 1.8<br>(<0.1–6.4)        | 1.8<br>(<0.1–6.2)        | 1.1<br>(<0.1–3.2)         | 1.2<br>(<0.1–3.4)         |
| Brazil                              | 17.1<br>(12.5–22.0)         | 8.2<br>(5.5–11.2)        | 1.4<br>(0.4–3.0)         | 2.0<br>(0.7–3.8)         | 5.8<br>(3.3–9.3)            | 5.8<br>(3.4–9.3)            | 6.0<br>(2.4–9.6)          | 5.9<br>(2.4–9.5)          | 6.6<br>(3.9–9.9)          | 6.8<br>(4.0–9.8)           | 5.1<br>(1.9–8.1)         | 0.9<br>(0.0–1.9)         | 1.8<br>(<0.1–6.4)        | 1.7<br>(<0.1–6.2)        | 1.1<br>(<0.1–3.2)         | 1.2<br>(<0.1–3.4)         |
| Paraguay                            | 26.0<br>(17.7–34.2)         | 13.8<br>(8.6–20.1)       | 6.1<br>(2.2–12.2)        | 9.0<br>(3.8–16.3)        | 6.3<br>(3.5–10.6)           | 6.1<br>(3.6–10.2)           | 7.9<br>(3.3–12.7)         | 7.9<br>(3.3–12.7)         | 6.3<br>(3.5–9.4)          | 7.0<br>(4.0–10.2)          | 9.2<br>(3.8–13.9)        | 1.1<br>(0.0–2.9)         | 5.2<br>(2.9–7.6)         | 5.2<br>(2.9–7.6)         | 0.9<br>(<0.1–5.0)         | 0.9<br>(<0.1–5.0)         |
| <b>North Africa and Middle East</b> | <b>24.5<br/>(19.0–30.1)</b> | <b>3.1<br/>(2.1–4.2)</b> | <b>2.7<br/>(1.5–4.3)</b> | <b>3.1<br/>(1.9–4.6)</b> | <b>18.7<br/>(12.7–25.7)</b> | <b>18.1<br/>(12.0–24.9)</b> | <b>6.5<br/>(2.7–10.4)</b> | <b>6.4<br/>(2.7–10.2)</b> | <b>9.5<br/>(6.0–13.3)</b> | <b>11.3<br/>(7.0–15.5)</b> | <b>0.4<br/>(0.1–0.7)</b> | <b>0.1<br/>(0.0–0.3)</b> | <b>4.6<br/>(3.0–6.3)</b> | <b>4.3<br/>(2.8–5.9)</b> | <b>9.4<br/>(6.0–12.9)</b> | <b>9.9<br/>(6.6–13.4)</b> |
| Afghanistan                         | 13.8<br>(9.9–17.9)          | 1.6<br>(0.9–2.6)         | 32.5<br>(19.2–44.6)      | 38.0<br>(26.3–49.2)      | 12.7<br>(6.2–20.9)          | 9.8<br>(4.3–17.4)           | 15.7<br>(6.8–23.8)        | 15.7<br>(6.8–23.8)        | 9.4<br>(5.6–13.7)         | 9.8<br>(5.8–14.0)          | <0.1<br>(0.0–<0.1)       | <0.1<br>(0.0–<0.1)       | 3.1<br>(1.9–4.2)         | 3.1<br>(1.9–4.2)         | 13.7<br>(9.0–19.6)        | 13.7<br>(9.0–19.6)        |
| Algeria                             | 29.6<br>(22.8–36.3)         | 2.3<br>(1.4–3.7)         | <0.1<br>(<0.1–0.1)       | 0.1<br>(<0.1–0.1)        | 16.6<br>(9.1–25.5)          | 16.6<br>(9.1–25.5)          | 4.9<br>(2.0–7.9)          | 4.9<br>(2.0–7.9)          | 12.1<br>(7.9–16.8)        | 15.3<br>(10.0–20.7)        | 0.3<br>(0.0–0.8)         | 0.1<br>(0.0–0.2)         | 9.2<br>(6.2–12.2)        | 9.2<br>(6.2–12.2)        | 4.3<br>(<0.1–10.1)        | 4.3<br>(<0.1–10.1)        |
| Bahrain                             | 25.6<br>(18.9–32.4)         | 5.5<br>(3.3–8.3)         | 0.1<br>(<0.1–0.1)        | 0.1<br>(<0.1–0.2)        | 26.5<br>(17.9–36.4)         | 26.5<br>(17.9–36.4)         | 4.6<br>(1.9–7.4)          | 4.6<br>(1.9–7.4)          | 9.9<br>(6.2–14.1)         | 10.1<br>(6.5–14.1)         | 0.6<br>(0.0–1.2)         | 0.1<br>(0.0–0.3)         | 11.6<br>(5.8–16.6)       | 11.6<br>(5.8–16.6)       | 2.0<br>(<0.1–10.1)        | 2.0<br>(<0.1–10.1)        |
| Egypt                               | 33.1<br>(25.7–40.4)         | 1.3<br>(0.7–2.1)         | <0.1<br>(<0.1–<0.1)      | <0.1<br>(<0.1–0.1)       | 28.9<br>(19.3–40.0)         | 28.9<br>(19.3–40.0)         | 3.8<br>(1.5–6.3)          | 3.8<br>(1.5–6.3)          | 7.9<br>(4.7–11.1)         | 11.2<br>(7.0–15.9)         | 0.1<br>(0.0–0.4)         | <0.1<br>(0.0–0.1)        | 7.7<br>(4.8–10.9)        | 7.7<br>(4.8–10.9)        | 2.7<br>(<0.1–9.1)         | 2.7<br>(<0.1–9.1)         |
| Iran (Islamic Republic of)          | 16.8<br>(12.2–22.1)         | 2.1<br>(1.3–3.2)         | <0.1<br>(<0.1–0.1)       | <0.1<br>(<0.1–0.1)       | 18.7<br>(12.2–26.5)         | 18.6<br>(12.1–26.2)         | 4.3<br>(1.7–7.0)          | 4.2<br>(1.7–6.9)          | 9.0<br>(5.3–12.8)         | 9.9<br>(6.1–13.9)          | 0.5<br>(0.2–0.8)         | 0.1<br>(0.1–0.3)         | 2.9<br>(1.9–4.0)         | 2.9<br>(1.8–3.9)         | 13.6<br>(10.6–16.8)       | 13.8<br>(10.7–17.0)       |
| Iraq                                | 33.0<br>(26.2–40.0)         | 5.4<br>(3.5–7.6)         | <0.1<br>(<0.1–0.1)       | 0.1<br>(<0.1–0.2)        | 22.7<br>(14.6–32.4)         | 22.7<br>(14.6–32.3)         | 2.7<br>(1.1–4.5)          | 2.7<br>(1.1–4.5)          | 12.3<br>(7.4–17.3)        | 13.2<br>(8.4–18.2)         | 0.2<br>(0.0–0.6)         | <0.1<br>(0.0–0.2)        | 10.8<br>(7.5–13.8)       | 10.8<br>(7.5–13.8)       | 4.7<br>(<0.1–10.6)        | 4.7<br>(<0.1–10.6)        |
| Jordan                              | 32.5<br>(25.5–39.7)         | 7.4<br>(4.8–10.5)        | <0.1<br>(<0.1–<0.1)      | <0.1<br>(<0.1–<0.1)      | 15.7<br>(9.8–23.4)          | 15.7<br>(9.8–23.4)          | 4.2<br>(1.7–6.9)          | 4.2<br>(1.7–6.9)          | 8.3<br>(5.0–11.7)         | 11.2<br>(6.9–16.0)         | 0.2<br>(0.0–0.7)         | <0.1<br>(0.0–0.2)        | 3.2<br>(1.7–4.9)         | 3.2<br>(1.7–4.9)         | 6.0<br>(<0.1–12.1)        | 6.0<br>(<0.1–12.1)        |
| Kuwait                              | 23.9<br>(18.4–29.7)         | 3.6<br>(2.1–5.6)         | <0.1<br>(<0.1–<0.1)      | <0.1<br>(<0.1–<0.1)      | 27.1<br>(18.5–36.9)         | 27.1<br>(18.5–36.9)         | 3.7<br>(1.5–6.0)          | 3.7<br>(1.5–6.0)          | 10.7<br>(6.7–15.0)        | 14.1<br>(9.0–19.4)         | <0.1<br>(0.0–0.1)        | <0.1<br>(0.0–<0.1)       | 13.1<br>(7.6–18.0)       | 13.1<br>(7.6–18.0)       | 3.1<br>(<0.1–15.6)        | 3.1<br>(<0.1–15.6)        |
| Lebanon                             | 32.8<br>(26.3–40.1)         | 21.1<br>(15.2–27.3)      | <0.1<br>(<0.1–0.1)       | 0.1<br>(<0.1–0.1)        | 14.9<br>(9.0–22.6)          | 14.9<br>(9.0–22.6)          | 5.0<br>(2.1–8.0)          | 5.0<br>(2.1–8.0)          | 13.5<br>(8.8–18.9)        | 12.7<br>(7.8–17.6)         | 1.1<br>(0.4–2.0)         | 0.2<br>(0.0–0.5)         | 0.1<br>(<0.1–0.2)        | 0.1<br>(<0.1–0.2)        | 14.0<br>(10.4–17.5)       | 14.0<br>(10.4–17.5)       |
| Libya                               | 23.4<br>(17.5–29.4)         | 0.8<br>(0.4–1.3)         | <0.1<br>(<0.1–0.1)       | 0.1<br>(<0.1–0.1)        | 19.0<br>(11.0–29.3)         | 19.0<br>(11.0–29.3)         | 4.5<br>(1.9–7.4)          | 4.5<br>(1.9–7.4)          | 13.1<br>(8.5–18.1)        | 12.1<br>(7.9–16.7)         | 0.2<br>(<0.1–0.4)        | 0.1<br>(<0.1–0.2)        | 8.2<br>(4.7–12.0)        | 8.2<br>(4.7–12.0)        | 2.8<br>(<0.1–9.8)         | 2.8<br>(<0.1–9.8)         |
| Morocco                             | 15.5<br>(11.0–20.2)         | 0.9<br>(0.5–1.4)         | 0.9<br>(0.3–1.8)         | 1.3<br>(0.5–2.7)         | 17.4<br>(10.8–25.2)         | 17.3<br>(10.7–24.9)         | 7.6<br>(3.2–12.2)         | 7.6<br>(3.2–12.2)         | 7.9<br>(4.7–11.5)         | 8.6<br>(5.0–12.3)          | 0.1<br>(0.0–0.4)         | <0.1<br>(0.0–<0.1)       | 2.5<br>(1.6–3.4)         | 2.5<br>(1.6–3.4)         | 8.2<br>(4.8–11.8)         | 8.2<br>(4.8–11.8)         |
| Oman                                | 13.7<br>(9.8–18.1)          | 2.2<br>(1.2–3.6)         | 0.1<br>(<0.1–0.2)        | 0.1<br>(<0.1–0.3)        | 21.4<br>(12.7–31.3)         | 21.4<br>(12.7–31.3)         | 5.0<br>(2.0–8.2)          | 5.0<br>(2.0–8.2)          | 8.7<br>(5.1–12.4)         | 8.1<br>(5.1–11.7)          | 0.1<br>(0.0–0.4)         | <0.1<br>(0.0–0.1)        | 6.6<br>(<0.1–22.3)       | 6.6<br>(<0.1–22.3)       | 1.3<br>(<0.1–13.3)        | 1.3<br>(<0.1–13.3)        |
| Palestine                           | 31.7<br>(24.7–39.0)         | 3.6<br>(2.0–5.6)         | 0.2<br>(0.1–0.4)         | 0.3<br>(0.1–0.6)         | 15.9<br>(9.5–24.7)          | 15.9<br>(9.5–24.7)          | 7.1<br>(3.0–11.4)         | 7.1<br>(3.0–11.4)         | 8.3<br>(5.1–11.9)         | 11.9<br>(7.5–16.6)         | 1.2<br>(0.5–1.8)         | 0.4<br>(0.1–0.8)         | 2.2<br>(0.9–4.0)         | 2.2<br>(0.9–4.0)         | 3.9<br>(<0.1–10.5)        | 3.9<br>(<0.1–10.5)        |
| Qatar                               | 19.5<br>(14.5–25.0)         | 1.2<br>(0.6–2.1)         | <0.1<br>(<0.1–<0.1)      | <0.1<br>(<0.1–<0.1)      | 31.1<br>(22.0–41.1)         | 31.1<br>(22.0–41.1)         | 3.8<br>(1.5–6.3)          | 3.8<br>(1.5–6.3)          | 10.5<br>(6.7–15.1)        | 11.2<br>(7.1–15.5)         | 0.2<br>(0.0–0.7)         | <0.1<br>(0.0–0.2)        | 10.6<br>(3.7–19.5)       | 10.6<br>(3.7–19.5)       | 1.8<br>(<0.1–15.2)        | 1.8<br>(<0.1–15.2)        |

|                                               | Smoking                     |                          | Household air pollution    |                             | Ambient particulate matter  |                             | Handwashing                |                            | Secondhand smoke          |                            | Alcohol use               |                              | High temperature          |                           | Low temperature              |                              |
|-----------------------------------------------|-----------------------------|--------------------------|----------------------------|-----------------------------|-----------------------------|-----------------------------|----------------------------|----------------------------|---------------------------|----------------------------|---------------------------|------------------------------|---------------------------|---------------------------|------------------------------|------------------------------|
|                                               | M                           | F                        | M                          | F                           | M                           | F                           | M                          | F                          | M                         | F                          | M                         | F                            | M                         | F                         | M                            | F                            |
| Saudi Arabia                                  | 15.4<br>(11.1–20.3)         | 1.8<br>(1.0–3.0)         | <0.1<br>(<0.1–0.1)         | 0.1<br>(<0.1–0.2)           | 27.0<br>(18.4–37.3)         | 27.0<br>(18.4–37.3)         | 4.2<br>(1.7–6.7)           | 4.2<br>(1.7–6.7)           | 10.7<br>(6.8–15.2)        | 12.2<br>(7.9–16.9)         | 0.1<br>(0.0–0.5)          | <0.1<br>(0.0–0.1)            | 9.7<br>(5.9–14.1)         | 9.7<br>(5.9–14.1)         | 2.4<br>(<0.1–8.8)            | 2.4<br>(<0.1–8.8)            |
| Sudan                                         | 21.2<br>(15.5–27.6)         | 2.0<br>(1.2–3.1)         | 11.6<br>(5.6–20.4)         | 16.2<br>(9.1–25.7)          | 20.9<br>(12.0–31.6)         | 19.2<br>(11.2–29.1)         | 17.7<br>(7.9–26.7)         | 17.7<br>(7.9–26.7)         | 11.1<br>(7.5–15.6)        | 10.7<br>(7.1–14.7)         | <0.1<br>(0.0–<0.1)        | <0.1<br>(0.0–<0.1)           | 8.3<br>(3.6–15.7)         | 8.3<br>(3.6–15.7)         | 1.5<br>(<0.1–7.2)            | 1.5<br>(<0.1–7.2)            |
| Syrian Arab Republic                          | 28.8<br>(21.8–36.2)         | 3.6<br>(2.1–5.8)         | <0.1<br>(<0.1–<0.1)        | <0.1<br>(<0.1–0.1)          | 15.8<br>(9.6–23.6)          | 15.8<br>(9.6–23.6)          | 4.9<br>(2.0–7.9)           | 4.9<br>(2.0–7.9)           | 9.0<br>(5.5–12.8)         | 9.5<br>(5.8–13.4)          | 0.6<br>(0.2–1.1)          | <0.1<br>(0.0–0.1)            | 4.4<br>(2.5–6.3)          | 4.4<br>(2.5–6.3)          | 7.7<br>(2.5–12.6)            | 7.7<br>(2.5–12.6)            |
| Tunisia                                       | 33.5<br>(26.2–40.7)         | 2.5<br>(1.4–3.8)         | <0.1<br>(<0.1–0.1)         | 0.1<br>(<0.1–0.1)           | 15.5<br>(8.9–24.1)          | 15.5<br>(8.9–24.1)          | 5.7<br>(2.4–9.2)           | 5.7<br>(2.4–9.2)           | 10.5<br>(6.5–14.9)        | 12.3<br>(7.6–17.1)         | 0.8<br>(0.1–1.6)          | 0.1<br>(0.0–0.3)             | 4.5<br>(2.3–6.7)          | 4.5<br>(2.3–6.7)          | 5.1<br>(<0.1–11.3)           | 5.1<br>(<0.1–11.3)           |
| Turkey                                        | 26.4<br>(20.4–32.6)         | 4.1<br>(2.7–5.9)         | 0.1<br>(<0.1–0.2)          | 0.1<br>(<0.1–0.2)           | 13.5<br>(8.4–20.4)          | 13.5<br>(8.4–20.3)          | 5.8<br>(2.4–9.3)           | 5.8<br>(2.4–9.3)           | 8.7<br>(5.4–12.6)         | 11.4<br>(7.1–15.9)         | 0.6<br>(0.1–1.3)          | 0.3<br>(0.0–0.7)             | 0.4<br>(0.1–0.7)          | 0.4<br>(0.1–0.7)          | 18.3<br>(13.7–23.4)          | 18.3<br>(13.7–23.4)          |
| United Arab Emirates                          | 18.3<br>(13.2–23.6)         | 3.6<br>(2.0–5.8)         | <0.1<br>(<0.1–<0.1)        | <0.1<br>(<0.1–<0.1)         | 21.1<br>(13.2–30.8)         | 21.1<br>(13.2–30.8)         | 3.8<br>(1.5–6.2)           | 3.8<br>(1.5–6.2)           | 13.2<br>(8.2–18.2)        | 13.2<br>(8.6–18.2)         | 0.5<br>(0.0–1.6)          | 0.1<br>(0.0–0.4)             | 8.4<br>(<0.1–25.0)        | 8.4<br>(<0.1–25.0)        | 1.9<br>(<0.1–18.2)           | 1.9<br>(<0.1–18.2)           |
| Yemen                                         | 27.7<br>(21.8–34.1)         | 7.2<br>(4.7–10.4)        | 12.1<br>(5.8–21.8)         | 16.3<br>(8.8–25.7)          | 17.3<br>(9.2–27.6)          | 15.5<br>(7.9–24.7)          | 13.5<br>(5.8–20.7)         | 13.5<br>(5.8–20.7)         | 11.7<br>(7.4–16.4)        | 12.3<br>(7.9–16.9)         | 0.3<br>(<0.1–0.6)         | 0.1<br>(0.0–0.2)             | 5.5<br>(1.6–12.3)         | 5.5<br>(1.6–12.3)         | 0.9<br>(<0.1–5.1)            | 0.9<br>(<0.1–5.1)            |
| <b>South Asia</b>                             | <b>22.5<br/>(16.2–28.7)</b> | <b>5.2<br/>(3.3–7.2)</b> | <b>15.3<br/>(8.5–24.2)</b> | <b>19.9<br/>(12.7–28.5)</b> | <b>24.7<br/>(18.4–31.2)</b> | <b>22.2<br/>(16.4–28.3)</b> | <b>12.1<br/>(5.2–18.7)</b> | <b>11.8<br/>(5.1–18.1)</b> | <b>6.8<br/>(3.5–10.3)</b> | <b>8.5<br/>(4.7–12.7)</b>  | <b>3.1<br/>(1.1–5.3)</b>  | <b>0.2<br/>(&lt;0.1–0.4)</b> | <b>6.9<br/>(3.8–11.3)</b> | <b>6.7<br/>(3.6–11.2)</b> | <b>2.3<br/>(&lt;0.1–6.7)</b> | <b>2.2<br/>(&lt;0.1–6.4)</b> |
| Bangladesh                                    | 23.3<br>(15.2–31.3)         | 3.4<br>(1.9–5.2)         | 21.5<br>(11.9–33.7)        | 28.4<br>(18.0–40.0)         | 20.0<br>(13.8–26.5)         | 17.3<br>(11.5–23.3)         | 18.1<br>(8.1–27.1)         | 18.1<br>(8.1–27.1)         | 6.4<br>(3.1–10.3)         | 9.0<br>(4.4–14.2)          | 0.4<br>(0.0–1.0)          | 0.1<br>(0.0–0.2)             | 5.9<br>(2.7–9.8)          | 5.9<br>(2.7–9.8)          | 1.3<br>(<0.1–4.8)            | 1.3<br>(<0.1–4.8)            |
| Bhutan                                        | 12.8<br>(8.6–17.5)          | 3.0<br>(1.8–4.6)         | 16.3<br>(8.1–27.9)         | 21.6<br>(12.9–32.9)         | 15.2<br>(10.1–21.3)         | 13.3<br>(8.4–19.1)          | 6.1<br>(2.5–9.8)           | 6.1<br>(2.5–9.8)           | 4.2<br>(2.3–6.4)          | 4.6<br>(2.5–7.1)           | 0.8<br>(0.0–2.3)          | <0.1<br>(0.0–0.2)            | <0.1<br>(<0.1–0.1)        | <0.1<br>(<0.1–0.1)        | 18.6<br>(11.8–26.9)          | 18.6<br>(11.8–26.9)          |
| India                                         | 22.0<br>(15.8–28.1)         | 5.2<br>(3.2–7.2)         | 14.4<br>(8.0–22.8)         | 19.0<br>(12.1–27.3)         | 25.5<br>(18.9–31.9)         | 22.7<br>(16.9–28.9)         | 11.5<br>(5.0–17.9)         | 11.4<br>(4.9–17.5)         | 6.9<br>(3.6–10.6)         | 8.6<br>(4.7–12.7)          | 3.6<br>(1.3–6.2)          | 0.2<br>(<0.1–0.4)            | 7.0<br>(3.8–11.6)         | 6.7<br>(3.5–11.4)         | 2.0<br>(<0.1–6.4)            | 2.0<br>(<0.1–6.2)            |
| Nepal                                         | 26.0<br>(17.0–34.4)         | 17.1<br>(10.2–23.9)      | 22.4<br>(12.6–35.1)        | 28.9<br>(18.4–40.2)         | 22.8<br>(15.0–31.2)         | 19.4<br>(12.0–27.6)         | 11.3<br>(4.9–17.8)         | 11.3<br>(4.9–17.8)         | 5.6<br>(2.4–9.2)          | 4.8<br>(2.1–8.2)           | 2.3<br>(0.0–5.8)          | 0.3<br>(0.0–0.8)             | 1.4<br>(0.7–2.2)          | 1.4<br>(0.7–2.2)          | 13.0<br>(7.6–19.0)           | 13.0<br>(7.6–19.0)           |
| Pakistan                                      | 26.8<br>(19.6–33.8)         | 4.1<br>(2.4–6.4)         | 17.4<br>(9.6–27.0)         | 22.9<br>(14.0–32.4)         | 20.8<br>(14.2–28.6)         | 18.4<br>(12.6–25.4)         | 12.3<br>(5.2–19.2)         | 12.3<br>(5.2–19.1)         | 6.1<br>(3.3–9.4)          | 8.7<br>(4.8–13.2)          | 0.6<br>(0.1–1.3)          | <0.1<br>(0.0–0.1)            | 9.2<br>(5.6–15.5)         | 9.2<br>(5.6–15.6)         | 4.9<br>(<0.1–12.6)           | 5.0<br>(<0.1–12.6)           |
| <b>Southeast Asia, East Asia, and Oceania</b> | <b>31.9<br/>(24.7–39.0)</b> | <b>5.6<br/>(3.4–7.9)</b> | <b>6.1<br/>(2.8–10.9)</b>  | <b>9.7<br/>(5.2–15.4)</b>   | <b>15.6<br/>(10.6–21.3)</b> | <b>14.5<br/>(9.9–19.6)</b>  | <b>5.0<br/>(2.1–8.0)</b>   | <b>5.2<br/>(2.1–8.2)</b>   | <b>8.6<br/>(5.2–12.2)</b> | <b>12.8<br/>(7.9–17.7)</b> | <b>6.7<br/>(3.1–10.0)</b> | <b>0.9<br/>(0.2–1.7)</b>     | <b>1.3<br/>(0.2–4.3)</b>  | <b>1.4<br/>(0.1–5.1)</b>  | <b>6.7<br/>(4.2–9.2)</b>     | <b>6.2<br/>(3.8–8.9)</b>     |
| East Asia                                     | 34.3<br>(27.0–41.2)         | 5.4<br>(3.5–7.5)         | 4.4<br>(1.9–8.2)           | 7.1<br>(3.5–12.3)           | 19.5<br>(13.5–26.5)         | 18.8<br>(12.9–25.2)         | 3.6<br>(1.5–5.9)           | 3.6<br>(1.5–6.0)           | 9.8<br>(6.2–13.9)         | 15.3<br>(10.0–20.9)        | 8.0<br>(3.9–12.0)         | 1.2<br>(0.3–2.2)             | 0.8<br>(0.2–1.5)          | 0.8<br>(0.2–1.5)          | 11.4<br>(7.4–15.0)           | 11.4<br>(7.6–15.0)           |
| China                                         | 35.5<br>(28.1–42.4)         | 5.8<br>(3.7–8.1)         | 4.4<br>(1.8–8.3)           | 6.6<br>(3.1–11.8)           | 20.3<br>(14.0–27.3)         | 19.4<br>(13.5–26.1)         | 3.8<br>(1.5–6.3)           | 3.8<br>(1.5–6.3)           | 9.9<br>(6.2–14.0)         | 15.7<br>(10.2–21.3)        | 8.2<br>(4.1–12.5)         | 1.3<br>(0.3–2.4)             | 0.8<br>(0.2–1.5)          | 0.9<br>(0.2–1.6)          | 11.9<br>(7.7–15.6)           | 11.6<br>(7.8–15.2)           |
| Democratic People's Republic of Korea         | 32.1<br>(24.6–40.1)         | 3.6<br>(1.9–5.8)         | 19.5<br>(10.2–31.3)        | 26.2<br>(16.0–38.1)         | 16.4<br>(10.4–22.7)         | 14.4<br>(9.2–20.5)          | 2.3<br>(0.9–3.7)           | 2.3<br>(0.9–3.7)           | 8.3<br>(4.9–11.9)         | 14.2<br>(9.0–19.9)         | 5.5<br>(1.8–9.3)          | 0.4<br>(0.0–0.9)             | 0.1<br>(<0.1–0.7)         | 0.1<br>(<0.1–0.7)         | 19.3<br>(11.7–29.7)          | 19.3<br>(11.7–29.7)          |
| Taiwan (Province of China)                    | 21.7<br>(15.5–27.9)         | 0.8<br>(0.4–1.2)         | 0.4<br>(0.1–1.2)           | 0.7<br>(0.1–1.8)            | 12.1<br>(7.5–17.9)          | 12.1<br>(7.5–17.9)          | 1.8<br>(0.7–3.0)           | 1.8<br>(0.7–3.0)           | 9.1<br>(5.6–13.1)         | 10.9<br>(6.7–15.8)         | 5.9<br>(2.1–9.7)          | 0.5<br>(<0.1–1.2)            | 0.9<br>(0.2–2.3)          | 0.9<br>(0.2–2.3)          | 3.5<br>(<0.1–6.8)            | 3.5<br>(<0.1–6.8)            |

|                                     | Smoking             |                     | Household air pollution |                     | Ambient particulate matter |                   | Handwashing        |                    | Secondhand smoke   |                    | Alcohol use       |                    | High temperature   |                    | Low temperature    |                    |
|-------------------------------------|---------------------|---------------------|-------------------------|---------------------|----------------------------|-------------------|--------------------|--------------------|--------------------|--------------------|-------------------|--------------------|--------------------|--------------------|--------------------|--------------------|
|                                     | M                   | F                   | M                       | F                   | M                          | F                 | M                  | F                  | M                  | F                  | M                 | F                  | M                  | F                  | M                  | F                  |
| Oceania                             | 17.9<br>(11.6–24.4) | 8.8<br>(5.2–12.8)   | 30.8<br>(18.3–43.0)     | 36.6<br>(25.4–46.6) | 4.6<br>(1.5–11.1)          | 3.8<br>(1.3–9.2)  | 9.2<br>(4.0–14.5)  | 9.2<br>(3.9–14.7)  | 7.3<br>(3.6–11.6)  | 8.5<br>(4.2–13.4)  | 0.8<br>(0.0–2.5)  | <0.1<br>(0.0–0.2)  | 0.5<br>(<0.1–2.2)  | 0.5<br>(<0.1–2.2)  | 1.0<br>(<0.1–2.4)  | 1.0<br>(<0.1–2.4)  |
| Fiji                                | 20.7<br>(13.6–28.3) | 4.6<br>(2.4–7.4)    | 4.2<br>(1.2–9.4)        | 6.4<br>(2.2–13.1)   | 5.4<br>(1.4–13.3)          | 5.4<br>(1.5–13.1) | 2.9<br>(1.2–4.8)   | 2.9<br>(1.2–4.8)   | 5.7<br>(2.5–9.6)   | 7.1<br>(3.3–11.7)  | 2.8<br>(0.7–5.2)  | 0.1<br>(0.0–0.3)   | 0.5<br>(<0.1–2.4)  | 0.5<br>(<0.1–2.4)  | <0.1<br>(<0.1–1.7) | <0.1<br>(<0.1–1.7) |
| Kiribati                            | 39.5<br>(31.2–47.1) | 23.1<br>(15.0–30.9) | 24.1<br>(12.5–37.1)     | 31.0<br>(19.8–43.3) | 3.8<br>(1.3–8.6)           | 3.2<br>(1.1–7.3)  | 6.5<br>(2.7–10.4)  | 6.5<br>(2.7–10.4)  | 9.5<br>(4.9–14.7)  | 10.7<br>(5.7–16.3) | 0.5<br>(0.0–2.3)  | <0.1<br>(0.0–0.1)  | 0.9<br>(<0.1–5.0)  | 0.9<br>(<0.1–5.0)  | <0.1<br>(<0.1–0.1) | <0.1<br>(<0.1–0.1) |
| Marshall Islands                    | 15.5<br>(10.3–21.4) | 4.8<br>(2.5–7.7)    | 7.5<br>(3.0–14.4)       | 10.9<br>(5.1–18.9)  | 4.4<br>(1.6–9.2)           | 4.2<br>(1.6–8.7)  | 4.5<br>(1.8–7.3)   | 4.5<br>(1.8–7.3)   | 7.0<br>(3.6–11.0)  | 8.6<br>(4.5–13.0)  | 1.3<br>(0.0–4.6)  | <0.1<br>(0.0–0.3)  | 0.2<br>(<0.1–11.3) | 0.2<br>(<0.1–11.3) | <0.1<br>(<0.1–0.1) | <0.1<br>(<0.1–0.1) |
| Micronesia<br>(Federated States of) | 24.3<br>(16.3–32.5) | 9.7<br>(5.0–15.3)   | 6.6<br>(2.4–13.4)       | 9.8<br>(4.1–18.1)   | 5.1<br>(1.5–12.2)          | 4.9<br>(1.5–11.4) | 3.9<br>(1.6–6.4)   | 3.9<br>(1.6–6.4)   | 6.1<br>(2.6–10.3)  | 6.9<br>(3.0–11.7)  | 1.4<br>(0.0–3.1)  | <0.1<br>(0.0–0.1)  | 0.2<br>(<0.1–11.3) | 0.2<br>(<0.1–11.3) | <0.1<br>(<0.1–0.2) | <0.1<br>(<0.1–0.2) |
| Nauru                               | 20.0<br>(12.8–27.7) | 10.7<br>(5.7–16.5)  | 0.5<br>(0.1–1.5)        | 0.9<br>(0.2–2.2)    | 1.9<br>(0.4–5.1)           | 2.0<br>(0.6–5.2)  | 3.1<br>(1.2–5.1)   | 3.1<br>(1.2–5.1)   | 6.6<br>(2.9–11.0)  | 7.6<br>(3.3–12.6)  | 3.6<br>(0.2–7.4)  | 0.1<br>(0.0–0.5)   | 2.4<br>(<0.1–31.1) | 2.4<br>(<0.1–31.1) | <0.1<br>(<0.1–0.3) | <0.1<br>(<0.1–0.3) |
| Palau                               | 16.3<br>(10.8–22.1) | 4.2<br>(2.3–7.0)    | <0.1<br>(<0.1–<0.1)     | <0.1<br>(<0.1–<0.1) | 2.0<br>(<0.1–5.9)          | 2.0<br>(<0.1–5.9) | 2.4<br>(0.9–3.9)   | 2.4<br>(0.9–3.9)   | 9.3<br>(5.1–14.2)  | 10.6<br>(5.8–15.9) | 1.3<br>(0.0–4.2)  | <0.1<br>(0.0–0.2)  | 0.9<br>(<0.1–28.7) | 0.9<br>(<0.1–28.7) | <0.1<br>(<0.1–0.4) | <0.1<br>(<0.1–0.4) |
| Papua New<br>Guinea                 | 13.8<br>(7.9–20.2)  | 9.5<br>(5.4–14.6)   | 37.9<br>(22.7–52.8)     | 44.8<br>(31.5–56.7) | 4.7<br>(1.3–12.1)          | 3.7<br>(1.0–9.9)  | 12.2<br>(5.2–19.0) | 12.2<br>(5.2–19.0) | 7.3<br>(3.4–12.0)  | 8.4<br>(3.9–13.7)  | 0.5<br>(0.0–2.3)  | <0.1<br>(0.0–0.1)  | 0.4<br>(<0.1–1.9)  | 0.4<br>(<0.1–1.9)  | 1.6<br>(<0.1–3.7)  | 1.6<br>(<0.1–3.7)  |
| Samoa                               | 29.2<br>(22.2–36.4) | 8.7<br>(5.4–13.0)   | 14.8<br>(6.6–26.4)      | 20.6<br>(11.2–32.3) | 5.2<br>(1.4–12.2)          | 4.7<br>(1.3–10.9) | 2.2<br>(0.9–3.6)   | 2.2<br>(0.9–3.6)   | 11.1<br>(6.6–16.0) | 12.7<br>(7.4–18.2) | 1.5<br>(0.0–4.5)  | <0.1<br>(0.0–0.3)  | 0.4<br>(<0.1–2.2)  | 0.4<br>(<0.1–2.2)  | 0.1<br>(<0.1–1.4)  | 0.1<br>(<0.1–1.4)  |
| Solomon Islands                     | 29.4<br>(21.2–38.1) | 9.8<br>(5.9–14.7)   | 38.1<br>(23.2–53.1)     | 45.4<br>(31.8–57.7) | 3.9<br>(1.2–9.2)           | 3.1<br>(0.9–7.2)  | 4.9<br>(2.0–7.9)   | 4.9<br>(2.0–7.9)   | 7.5<br>(3.7–11.7)  | 9.0<br>(4.5–14.0)  | 0.4<br>(0.0–2.1)  | <0.1<br>(0.0–0.1)  | 0.5<br>(<0.1–3.3)  | 0.5<br>(<0.1–3.3)  | <0.1<br>(<0.1–0.5) | <0.1<br>(<0.1–0.5) |
| Tonga                               | 30.6<br>(22.2–39.1) | 6.7<br>(3.6–10.6)   | 6.7<br>(2.3–13.4)       | 9.9<br>(4.0–18.4)   | 5.3<br>(1.5–12.4)          | 5.1<br>(1.6–11.6) | 3.3<br>(1.3–5.4)   | 3.3<br>(1.3–5.4)   | 8.3<br>(4.3–12.7)  | 10.1<br>(5.5–15.1) | 0.6<br>(0.0–2.4)  | <0.1<br>(0.0–0.2)  | 1.2<br>(<0.1–3.0)  | 1.2<br>(<0.1–3.0)  | 0.2<br>(<0.1–2.6)  | 0.2<br>(<0.1–2.6)  |
| Tuvalu                              | 21.0<br>(14.3–27.9) | 7.5<br>(4.0–11.8)   | 1.6<br>(0.4–4.1)        | 2.6<br>(0.8–5.6)    | 2.4<br>(0.8–5.6)           | 2.5<br>(1.0–5.6)  | 3.7<br>(1.5–6.1)   | 3.7<br>(1.5–6.1)   | 7.8<br>(3.8–12.3)  | 8.9<br>(4.5–13.7)  | 0.8<br>(0.0–2.7)  | <0.1<br>(0.0–0.2)  | 1.4<br>(<0.1–12.8) | 1.4<br>(<0.1–12.8) | 0.1<br>(<0.1–0.7)  | 0.1<br>(<0.1–0.7)  |
| Vanuatu                             | 19.9<br>(12.4–27.4) | 3.2<br>(1.5–5.3)    | 28.4<br>(15.5–42.8)     | 36.3<br>(23.3–49.6) | 4.9<br>(1.5–10.9)          | 4.1<br>(1.2–9.2)  | 10.0<br>(4.3–15.7) | 10.0<br>(4.3–15.7) | 4.3<br>(1.8–7.4)   | 4.4<br>(1.9–7.4)   | 1.2<br>(<0.1–3.0) | <0.1<br>(0.0–0.1)  | 0.4<br>(<0.1–2.1)  | 0.4<br>(<0.1–2.1)  | <0.1<br>(<0.1–1.8) | <0.1<br>(<0.1–1.8) |
| Southeast Asia                      | 28.5<br>(20.6–36.2) | 5.7<br>(3.1–8.6)    | 8.5<br>(4.0–14.5)       | 12.5<br>(6.9–19.4)  | 10.1<br>(6.6–14.4)         | 9.5<br>(6.4–13.5) | 6.8<br>(2.8–11.0)  | 7.0<br>(2.9–11.1)  | 6.8<br>(3.7–10.1)  | 9.9<br>(5.7–14.7)  | 4.9<br>(1.9–7.8)  | 0.6<br>(0.0–1.3)   | 1.9<br>(<0.1–8.8)  | 2.0<br>(<0.1–10.3) | <0.1<br>(<0.1–1.2) | <0.1<br>(<0.1–1.2) |
| Cambodia                            | 42.2<br>(33.1–51.0) | 7.5<br>(4.5–11.2)   | 26.8<br>(14.9–40.5)     | 34.3<br>(22.1–47.2) | 8.1<br>(4.5–13.0)          | 6.8<br>(3.9–10.9) | 8.6<br>(3.5–13.5)  | 8.6<br>(3.5–13.5)  | 5.1<br>(3.0–7.4)   | 12.2<br>(7.4–16.9) | 7.5<br>(2.4–12.5) | 0.7<br>(0.0–1.7)   | 2.7<br>(<0.1–21.8) | 2.7<br>(<0.1–21.8) | <0.1<br>(<0.1–0.3) | <0.1<br>(<0.1–0.3) |
| Indonesia                           | 31.9<br>(22.0–41.7) | 4.0<br>(2.2–6.2)    | 6.0<br>(2.4–11.7)       | 9.1<br>(4.1–16.1)   | 9.5<br>(5.9–14.2)          | 9.1<br>(5.8–13.3) | 7.2<br>(3.0–11.5)  | 7.3<br>(3.0–11.6)  | 5.5<br>(2.9–8.3)   | 10.9<br>(6.1–16.0) | 0.1<br>(0.0–0.7)  | <0.1<br>(0.0–<0.1) | 0.3<br>(<0.1–3.3)  | 0.3<br>(<0.1–3.3)  | <0.1<br>(<0.1–0.9) | <0.1<br>(<0.1–0.9) |
| Lao People's<br>Democratic Republic | 32.9<br>(23.6–41.9) | 4.7<br>(2.4–7.9)    | 28.9<br>(16.1–43.2)     | 36.9<br>(23.8–50.3) | 7.5<br>(4.3–11.6)          | 6.3<br>(3.6–9.6)  | 10.2<br>(4.3–15.9) | 10.2<br>(4.3–15.9) | 6.6<br>(3.6–10.2)  | 11.8<br>(6.6–17.5) | 3.6<br>(0.0–7.9)  | 0.8<br>(0.0–2.2)   | 1.8<br>(0.6–3.9)   | 1.8<br>(0.6–3.9)   | <0.1<br>(<0.1–2.9) | <0.1<br>(<0.1–2.9) |
| Malaysia                            | 26.1<br>(19.0–33.3) | 3.0<br>(1.6–4.8)    | 0.1<br>(<0.1–0.2)       | 0.1<br>(<0.1–0.3)   | 8.3<br>(4.7–13.2)          | 8.3<br>(4.7–13.2) | 2.0<br>(0.8–3.2)   | 2.0<br>(0.8–3.2)   | 7.0<br>(3.7–10.5)  | 10.8<br>(6.2–15.6) | 0.9<br>(0.0–2.2)  | 0.1<br>(0.0–0.4)   | 0.8<br>(<0.1–3.9)  | 0.8<br>(<0.1–3.9)  | <0.1<br>(<0.1–0.8) | <0.1<br>(<0.1–0.8) |

|                                  | Smoking                    |                          | Household air pollution     |                             | Ambient particulate matter |                            | Handwashing                |                            | Secondhand smoke         |                          | Alcohol use              |                          | High temperature          |                          | Low temperature              |                          |
|----------------------------------|----------------------------|--------------------------|-----------------------------|-----------------------------|----------------------------|----------------------------|----------------------------|----------------------------|--------------------------|--------------------------|--------------------------|--------------------------|---------------------------|--------------------------|------------------------------|--------------------------|
|                                  | M                          | F                        | M                           | F                           | M                          | F                          | M                          | F                          | M                        | F                        | M                        | F                        | M                         | F                        | M                            | F                        |
| Maldives                         | 30.6<br>(21.7–39.1)        | 4.2<br>(2.1–7.2)         | 2.1<br>(0.7–5.0)            | 3.2<br>(1.2–7.0)            | 5.2<br>(2.9–8.8)           | 5.2<br>(3.0–8.4)           | 8.1<br>(3.5–13.0)          | 8.1<br>(3.5–13.0)          | 7.7<br>(4.3–11.5)        | 11.9<br>(6.9–17.4)       | 0.4<br>(0.0–2.1)         | <0.1<br>(0.0–0.2)        | 0.4<br>(<0.1–11.4)        | 0.4<br>(<0.1–11.4)       | <0.1<br>(<0.1–0.1)           | <0.1<br>(<0.1–0.1)       |
| Mauritius                        | 23.7<br>(17.1–30.6)        | 2.1<br>(1.0–3.3)         | 0.1<br>(<0.1–0.4)           | 0.2<br>(0.1–0.5)            | 7.3<br>(3.0–13.8)          | 7.3<br>(3.1–13.7)          | 1.1<br>(0.4–1.8)           | 1.1<br>(0.4–1.8)           | 7.2<br>(3.9–10.9)        | 10.5<br>(5.8–15.5)       | 4.1<br>(0.0–8.5)         | 0.2<br>(0.0–1.1)         | 0.7<br>(<0.1–3.5)         | 0.7<br>(<0.1–3.5)        | <0.1<br>(<0.1–5.4)           | <0.1<br>(<0.1–5.4)       |
| Myanmar                          | 26.5<br>(17.6–35.3)        | 10.1<br>(4.8–16.0)       | 20.0<br>(10.1–31.9)         | 26.8<br>(16.1–39.0)         | 11.8<br>(7.9–16.1)         | 10.4<br>(7.0–14.1)         | 11.1<br>(4.7–17.5)         | 11.1<br>(4.7–17.5)         | 5.5<br>(2.3–9.0)         | 6.4<br>(2.9–10.7)        | 3.3<br>(0.6–6.2)         | 0.3<br>(0.0–0.9)         | 2.9<br>(1.3–5.3)          | 2.9<br>(1.3–5.3)         | 1.9<br>(<0.1–4.3)            | 1.9<br>(<0.1–4.3)        |
| Philippines                      | 27.7<br>(20.4–34.6)        | 9.5<br>(5.1–14.0)        | 13.2<br>(6.1–22.5)          | 16.8<br>(8.8–25.9)          | 8.4<br>(5.4–12.1)          | 8.2<br>(5.4–11.6)          | 6.5<br>(2.7–10.2)          | 6.3<br>(2.6–10.0)          | 9.7<br>(5.3–14.3)        | 10.0<br>(5.6–14.7)       | 5.2<br>(1.5–9.0)         | 1.0<br>(0.0–2.4)         | 2.4<br>(<0.1–21.9)        | 2.4<br>(<0.1–22.9)       | 0.2<br>(<0.1–0.8)            | 0.2<br>(<0.1–0.8)        |
| Seychelles                       | 30.0<br>(21.9–38.6)        | 3.5<br>(1.8–5.9)         | 0.1<br>(<0.1–0.2)           | 0.1<br>(<0.1–0.2)           | 7.7<br>(3.3–14.3)          | 7.7<br>(3.3–14.3)          | 3.9<br>(1.6–6.3)           | 3.9<br>(1.6–6.3)           | 7.2<br>(4.0–10.9)        | 8.7<br>(4.9–12.8)        | 7.3<br>(2.2–12.6)        | 0.6<br>(0.0–1.8)         | 1.0<br>(<0.1–3.8)         | 1.0<br>(<0.1–3.8)        | 0.2<br>(<0.1–1.3)            | 0.2<br>(<0.1–1.3)        |
| Sri Lanka                        | 17.1<br>(9.8–25.1)         | 1.7<br>(0.9–2.8)         | 7.6<br>(2.7–15.6)           | 11.1<br>(4.6–21.3)          | 10.0<br>(5.8–15.6)         | 9.6<br>(5.7–14.8)          | 5.0<br>(2.0–8.1)           | 5.0<br>(2.0–8.1)           | 3.7<br>(1.5–6.5)         | 5.3<br>(2.2–9.2)         | 6.9<br>(3.2–10.8)        | 0.9<br>(0.2–1.8)         | 1.2<br>(<0.1–13.3)        | 1.2<br>(<0.1–13.3)       | <0.1<br>(<0.1–0.8)           | <0.1<br>(<0.1–0.8)       |
| Thailand                         | 25.6<br>(17.5–33.7)        | 3.6<br>(1.9–5.5)         | 2.7<br>(0.9–5.8)            | 4.0<br>(1.5–8.2)            | 13.8<br>(8.8–20.0)         | 13.6<br>(8.8–19.6)         | 7.5<br>(3.1–12.1)          | 7.5<br>(3.1–12.1)          | 5.3<br>(2.8–8.0)         | 8.1<br>(4.4–12.3)        | 8.7<br>(3.9–13.6)        | 0.9<br>(0.0–1.9)         | 2.9<br>(<0.1–10.6)        | 2.9<br>(<0.1–10.6)       | <0.1<br>(<0.1–1.0)           | <0.1<br>(<0.1–1.0)       |
| Timor-Leste                      | 28.3<br>(19.3–37.5)        | 3.3<br>(1.5–5.8)         | 25.3<br>(13.2–39.3)         | 32.9<br>(20.8–46.6)         | 6.2<br>(3.0–11.2)          | 5.3<br>(2.5–9.6)           | 6.6<br>(2.7–10.6)          | 6.6<br>(2.7–10.6)          | 6.0<br>(2.7–9.6)         | 7.9<br>(3.8–12.7)        | 3.1<br>(0.4–6.2)         | 0.2<br>(0.0–0.7)         | 0.5<br>(<0.1–2.1)         | 0.5<br>(<0.1–2.1)        | <0.1<br>(<0.1–1.7)           | <0.1<br>(<0.1–1.7)       |
| Viet Nam                         | 32.2<br>(24.9–39.6)        | 2.6<br>(1.3–4.4)         | 7.6<br>(3.0–14.6)           | 11.1<br>(5.2–19.5)          | 10.0<br>(6.4–14.7)         | 9.6<br>(6.3–13.8)          | 8.6<br>(3.6–13.6)          | 8.6<br>(3.6–13.6)          | 7.8<br>(4.4–11.4)        | 12.2<br>(7.3–17.3)       | 10.7<br>(4.0–17.5)       | 0.3<br>(0.0–0.9)         | 2.7<br>(0.9–5.9)          | 2.7<br>(0.9–5.9)         | 0.2<br>(<0.1–3.2)            | 0.2<br>(<0.1–3.2)        |
| <b>Sub-Saharan Africa</b>        | <b>10.6<br/>(6.7–14.4)</b> | <b>2.5<br/>(1.4–3.7)</b> | <b>31.0<br/>(20.2–41.4)</b> | <b>35.2<br/>(25.4–44.7)</b> | <b>11.8<br/>(7.6–16.8)</b> | <b>10.0<br/>(6.5–14.1)</b> | <b>21.6<br/>(9.9–31.9)</b> | <b>21.4<br/>(9.9–31.5)</b> | <b>2.8<br/>(1.4–4.5)</b> | <b>3.2<br/>(1.5–5.1)</b> | <b>4.9<br/>(1.9–7.7)</b> | <b>1.5<br/>(0.3–2.8)</b> | <b>3.2<br/>(0.5–10.5)</b> | <b>2.9<br/>(0.5–9.7)</b> | <b>1.6<br/>(&lt;0.1–3.3)</b> | <b>1.7<br/>(0.1–3.5)</b> |
| Central Sub-Saharan Africa       | 10.0<br>(5.8–14.3)         | 0.9<br>(0.5–1.5)         | 32.0<br>(19.8–44.2)         | 39.5<br>(27.4–50.3)         | 10.2<br>(5.4–17.4)         | 8.2<br>(4.0–14.2)          | 22.6<br>(10.4–33.2)        | 22.6<br>(10.5–33.1)        | 1.4<br>(0.6–2.5)         | 1.7<br>(0.7–3.0)         | 3.2<br>(<0.1–6.5)        | 1.2<br>(0.0–3.0)         | 1.4<br>(0.2–3.2)          | 1.4<br>(0.3–3.3)         | <0.1<br>(<0.1–2.4)           | <0.1<br>(<0.1–2.4)       |
| Angola                           | 15.8<br>(11.0–21.1)        | 1.9<br>(1.0–3.2)         | 14.7<br>(7.3–24.7)          | 19.8<br>(11.5–30.0)         | 11.8<br>(6.2–19.1)         | 10.5<br>(5.5–17.2)         | 22.3<br>(10.2–32.8)        | 22.3<br>(10.2–32.8)        | 2.7<br>(1.4–4.3)         | 4.3<br>(2.3–6.4)         | 8.7<br>(3.6–13.7)        | 3.9<br>(0.9–7.1)         | 1.7<br>(0.5–3.8)          | 1.7<br>(0.5–3.8)         | <0.1<br>(<0.1–2.9)           | <0.1<br>(<0.1–2.9)       |
| Central African Republic         | 10.5<br>(6.5–15.2)         | 1.3<br>(0.6–2.2)         | 46.8<br>(31.2–58.9)         | 51.4<br>(39.6–63.8)         | 7.9<br>(2.5–17.1)          | 5.7<br>(1.8–12.6)          | 21.6<br>(9.9–31.8)         | 21.6<br>(9.9–31.8)         | 2.2<br>(1.0–3.8)         | 2.6<br>(1.1–4.3)         | 2.1<br>(0.0–6.3)         | 0.8<br>(0.0–2.8)         | 3.8<br>(1.5–7.0)          | 3.8<br>(1.5–7.0)         | <0.1<br>(<0.1–1.2)           | <0.1<br>(<0.1–1.2)       |
| Congo                            | 14.9<br>(9.6–20.8)         | 0.8<br>(0.4–1.4)         | 11.8<br>(5.4–21.2)          | 16.5<br>(9.1–26.5)          | 16.5<br>(9.0–27.7)         | 15.3<br>(8.2–25.8)         | 21.0<br>(9.5–31.0)         | 21.0<br>(9.5–31.0)         | 2.5<br>(1.1–4.0)         | 3.0<br>(1.4–4.9)         | 4.9<br>(0.0–10.3)        | 2.5<br>(0.0–6.1)         | 0.9<br>(<0.1–3.0)         | 0.9<br>(<0.1–3.0)        | <0.1<br>(<0.1–1.9)           | <0.1<br>(<0.1–1.9)       |
| Democratic Republic of the Congo | 8.1<br>(4.0–12.7)          | 0.7<br>(0.3–1.3)         | 38.4<br>(23.9–52.2)         | 45.2<br>(32.1–56.6)         | 9.2<br>(4.4–16.5)          | 7.1<br>(3.0–13.1)          | 23.0<br>(10.6–33.7)        | 23.0<br>(10.6–33.7)        | 0.9<br>(0.2–1.8)         | 1.1<br>(0.3–2.2)         | 1.5<br>(0.0–4.7)         | 0.6<br>(0.0–2.3)         | 1.3<br>(0.1–3.1)          | 1.3<br>(0.1–3.1)         | 0.1<br>(<0.1–2.6)            | 0.1<br>(<0.1–2.6)        |
| Equatorial Guinea                | 12.0<br>(7.1–17.5)         | 1.0<br>(0.5–1.8)         | 3.2<br>(1.2–6.7)            | 4.8<br>(1.9–9.3)            | 20.5<br>(10.1–33.9)        | 20.0<br>(10.1–33.1)        | 19.9<br>(9.0–29.7)         | 19.9<br>(9.0–29.7)         | 2.3<br>(0.9–4.2)         | 2.9<br>(1.1–4.9)         | 7.7<br>(2.4–13.6)        | 3.4<br>(0.4–7.3)         | 0.4<br>(<0.1–1.3)         | 0.4<br>(<0.1–1.3)        | <0.1<br>(<0.1–2.4)           | <0.1<br>(<0.1–2.4)       |
| Gabon                            | 9.7<br>(5.7–14.3)          | 0.9<br>(0.4–1.7)         | 1.2<br>(0.4–2.5)            | 1.8<br>(0.7–3.5)            | 17.8<br>(9.2–30.0)         | 17.7<br>(9.2–29.8)         | 16.9<br>(7.4–25.6)         | 16.9<br>(7.4–25.6)         | 2.6<br>(1.1–4.4)         | 2.9<br>(1.3–4.9)         | 9.5<br>(3.4–15.7)        | 4.3<br>(0.9–8.7)         | 0.7<br>(<0.1–2.6)         | 0.7<br>(<0.1–2.6)        | <0.1<br>(<0.1–1.5)           | <0.1<br>(<0.1–1.5)       |
| Eastern Sub-Saharan Africa       | 11.4<br>(6.9–16.1)         | 3.3<br>(1.7–4.9)         | 39.3<br>(26.2–51.3)         | 44.9<br>(32.8–55.7)         | 7.2<br>(4.0–11.2)          | 5.8<br>(3.2–9.2)           | 22.6<br>(10.4–33.2)        | 22.5<br>(10.4–33.1)        | 2.0<br>(0.8–3.5)         | 2.3<br>(1.0–3.9)         | 4.6<br>(1.7–7.5)         | 1.5<br>(0.4–2.7)         | 2.0<br>(0.4–5.3)          | 1.7<br>(0.4–4.6)         | 2.1<br>(<0.1–4.6)            | 1.7<br>(<0.1–4.3)        |

|                             | Smoking             |                    | Household air pollution |                     | Ambient particulate matter |                    | Handwashing         |                     | Secondhand smoke  |                   | Alcohol use        |                   | High temperature   |                    | Low temperature    |                    |
|-----------------------------|---------------------|--------------------|-------------------------|---------------------|----------------------------|--------------------|---------------------|---------------------|-------------------|-------------------|--------------------|-------------------|--------------------|--------------------|--------------------|--------------------|
|                             | M                   | F                  | M                       | F                   | M                          | F                  | M                   | F                   | M                 | F                 | M                  | F                 | M                  | F                  | M                  | F                  |
| Burundi                     | 9.5<br>(5.1–14.3)   | 1.5<br>(0.6–2.9)   | 48.3<br>(32.9–60.1)     | 52.7<br>(40.8–64.6) | 5.9<br>(2.0–12.2)          | 4.2<br>(1.3–9.5)   | 22.9<br>(10.6–33.7) | 22.9<br>(10.6–33.7) | 1.3<br>(0.5–2.4)  | 1.2<br>(0.5–2.3)  | 8.4<br>(3.2–13.7)  | 1.3<br>(0.3–2.6)  | <0.1<br>(<0.1–0.3) | <0.1<br>(<0.1–0.3) | <0.1<br>(<0.1–6.1) | <0.1<br>(<0.1–6.1) |
| Comoros                     | 16.9<br>(9.2–24.6)  | 1.9<br>(0.9–3.2)   | 29.2<br>(16.9–43.5)     | 36.9<br>(24.5–49.6) | 6.2<br>(3.4–9.9)           | 5.1<br>(2.8–8.2)   | 21.0<br>(9.6–31.1)  | 21.0<br>(9.6–31.1)  | 4.2<br>(1.9–6.9)  | 4.7<br>(2.2–7.6)  | 0.4<br>(0.0–1.4)   | 0.2<br>(0.0–0.6)  | 0.7<br>(<0.1–2.9)  | 0.7<br>(<0.1–2.9)  | 0.2<br>(<0.1–2.9)  | 0.2<br>(<0.1–2.9)  |
| Djibouti                    | 21.9<br>(13.4–30.3) | 3.6<br>(1.6–6.2)   | 6.5<br>(2.7–13.2)       | 9.3<br>(4.2–17.1)   | 18.6<br>(9.1–32.2)         | 17.5<br>(8.5–30.7) | 21.6<br>(9.9–32.0)  | 21.6<br>(9.9–32.0)  | 4.8<br>(2.1–8.3)  | 7.8<br>(3.5–13.2) | 0.2<br>(0.0–1.1)   | <0.1<br>(0.0–0.3) | 5.9<br>(<0.1–30.0) | 5.9<br>(<0.1–30.0) | 0.2<br>(<0.1–5.2)  | 0.2<br>(<0.1–5.2)  |
| Eritrea                     | 7.8<br>(4.6–11.5)   | 0.3<br>(0.2–0.6)   | 29.3<br>(16.5–42.7)     | 35.9<br>(23.0–47.4) | 12.8<br>(6.3–21.5)         | 10.4<br>(4.9–17.7) | 22.6<br>(10.4–33.1) | 22.6<br>(10.4–33.1) | 3.4<br>(1.7–5.3)  | 2.6<br>(1.3–4.1)  | 1.0<br>(0.0–3.4)   | 0.2<br>(0.0–1.0)  | 4.5<br>(<0.1–22.1) | 4.5<br>(<0.1–22.1) | 0.1<br>(<0.1–2.5)  | 0.1<br>(<0.1–2.5)  |
| Ethiopia                    | 6.2<br>(3.5–9.2)    | 0.4<br>(0.1–0.8)   | 44.5<br>(29.9–56.3)     | 49.1<br>(37.1–60.0) | 7.1<br>(3.2–12.3)          | 5.5<br>(2.5–10.1)  | 23.0<br>(10.7–33.8) | 23.0<br>(10.7–33.7) | 1.0<br>(0.3–1.9)  | 0.9<br>(0.3–1.7)  | 2.8<br>(0.0–6.1)   | 0.7<br>(0.0–2.2)  | 2.9<br>(0.6–9.0)   | 2.6<br>(0.6–7.9)   | 4.7<br>(3.0–6.7)   | 4.8<br>(3.1–6.9)   |
| Kenya                       | 12.8<br>(8.0–18.1)  | 2.4<br>(1.1–4.0)   | 26.4<br>(15.3–38.7)     | 33.5<br>(22.1–45.4) | 7.7<br>(4.5–11.9)          | 6.7<br>(3.9–10.3)  | 22.2<br>(10.2–32.7) | 22.2<br>(10.3–32.8) | 2.4<br>(1.1–4.2)  | 2.5<br>(1.1–4.2)  | 5.1<br>(1.2–9.4)   | 1.2<br>(0.3–2.3)  | 2.1<br>(0.2–8.3)   | 1.8<br>(0.2–6.8)   | 3.8<br>(1.9–6.0)   | 3.7<br>(1.8–6.0)   |
| Madagascar                  | 7.5<br>(4.1–11.7)   | 1.0<br>(0.4–1.8)   | 39.8<br>(24.8–54.2)     | 47.2<br>(33.7–59.0) | 5.2<br>(2.7–8.8)           | 4.0<br>(2.0–6.9)   | 22.4<br>(10.3–33.0) | 22.4<br>(10.3–33.0) | 2.0<br>(0.6–4.1)  | 2.3<br>(0.7–4.6)  | 1.3<br>(0.0–3.9)   | 0.3<br>(0.0–1.1)  | 0.8<br>(<0.1–2.4)  | 0.8<br>(<0.1–2.4)  | 1.0<br>(<0.1–3.8)  | 1.0<br>(<0.1–3.8)  |
| Malawi                      | 19.3<br>(11.8–27.7) | 2.6<br>(1.1–4.3)   | 42.6<br>(27.7–56.0)     | 49.0<br>(35.8–59.8) | 5.6<br>(2.6–10.0)          | 4.3<br>(1.9–7.9)   | 22.6<br>(10.4–33.3) | 22.6<br>(10.4–33.3) | 1.8<br>(0.7–3.1)  | 2.0<br>(0.8–3.6)  | 2.8<br>(0.5–5.9)   | 0.7<br>(0.0–2.1)  | 0.5<br>(<0.1–1.9)  | 0.5<br>(<0.1–1.9)  | 0.2<br>(<0.1–4.4)  | 0.2<br>(<0.1–4.4)  |
| Mozambique                  | 14.0<br>(8.2–20.4)  | 2.8<br>(1.3–4.8)   | 47.2<br>(31.8–59.3)     | 52.0<br>(40.4–62.6) | 4.4<br>(1.9–8.0)           | 3.2<br>(1.3–6.1)   | 22.2<br>(10.2–32.7) | 22.2<br>(10.2–32.7) | 1.8<br>(0.6–3.4)  | 2.2<br>(0.7–4.4)  | 1.1<br>(0.0–4.0)   | 0.3<br>(0.0–1.2)  | 2.4<br>(1.0–4.4)   | 2.4<br>(1.0–4.4)   | 0.2<br>(<0.1–3.3)  | 0.2<br>(<0.1–3.3)  |
| Rwanda                      | 23.6<br>(15.0–32.5) | 15.4<br>(9.3–22.1) | 34.8<br>(21.1–49.2)     | 42.5<br>(29.4–55.2) | 10.4<br>(4.9–18.0)         | 8.3<br>(3.7–15.3)  | 23.2<br>(10.7–34.0) | 23.2<br>(10.7–34.0) | 2.8<br>(1.4–4.5)  | 2.1<br>(1.0–3.4)  | 9.1<br>(3.1–15.1)  | 2.4<br>(0.3–5.1)  | <0.1<br>(<0.1–0.1) | <0.1<br>(<0.1–0.1) | 2.0<br>(<0.1–7.5)  | 2.0<br>(<0.1–7.5)  |
| Somalia                     | 14.1<br>(7.7–20.5)  | 2.5<br>(1.1–4.6)   | 58.4<br>(44.7–79.9)     | 61.4<br>(46.5–85.0) | 2.1<br>(0.5–6.7)           | 1.4<br>(0.3–4.3)   | 22.7<br>(10.5–33.4) | 22.7<br>(10.5–33.4) | 2.9<br>(1.2–5.0)  | 2.9<br>(1.2–5.2)  | 0.0<br>(0.0–0.0)   | 0.0<br>(0.0–0.0)  | 2.3<br>(<0.1–15.8) | 2.3<br>(<0.1–15.8) | 0.1<br>(<0.1–1.3)  | 0.1<br>(<0.1–1.3)  |
| South Sudan                 | 12.8<br>(7.0–18.8)  | 2.3<br>(1.0–4.1)   | 40.0<br>(25.6–53.9)     | 46.8<br>(33.8–58.2) | 9.3<br>(4.3–15.8)          | 7.1<br>(3.2–12.7)  | 22.9<br>(10.6–33.6) | 22.9<br>(10.6–33.6) | 3.1<br>(1.3–5.5)  | 3.6<br>(1.6–6.2)  | 0.1<br>(0.0–0.9)   | <0.1<br>(0.0–0.2) | 5.9<br>(<0.1–23.1) | 5.9<br>(<0.1–23.1) | <0.1<br>(<0.1–0.9) | <0.1<br>(<0.1–0.9) |
| Uganda                      | 9.7<br>(5.3–14.6)   | 3.9<br>(1.8–6.6)   | 37.3<br>(23.0–51.3)     | 44.7<br>(31.4–56.3) | 9.5<br>(5.0–15.1)          | 7.5<br>(3.7–12.3)  | 22.1<br>(10.1–32.5) | 22.1<br>(10.1–32.5) | 2.1<br>(0.8–3.7)  | 1.8<br>(0.8–3.3)  | 10.8<br>(5.1–16.2) | 3.7<br>(1.3–6.8)  | 1.1<br>(0.2–2.9)   | 1.1<br>(0.2–2.9)   | <0.1<br>(<0.1–2.3) | <0.1<br>(<0.1–2.3) |
| United Republic of Tanzania | 17.4<br>(10.5–24.2) | 5.4<br>(2.6–8.8)   | 36.6<br>(22.4–51.1)     | 44.3<br>(30.7–56.4) | 7.4<br>(4.1–11.4)          | 5.9<br>(3.2–9.2)   | 22.5<br>(10.4–33.2) | 22.5<br>(10.4–33.2) | 3.2<br>(1.5–5.2)  | 3.8<br>(1.8–6.2)  | 9.5<br>(4.5–14.5)  | 3.1<br>(1.0–5.9)  | 0.9<br>(0.1–2.7)   | 0.9<br>(0.1–2.7)   | 0.1<br>(<0.1–3.5)  | 0.1<br>(<0.1–3.5)  |
| Zambia                      | 15.3<br>(8.4–22.2)  | 9.5<br>(5.2–14.0)  | 23.8<br>(12.7–36.8)     | 31.1<br>(19.5–43.4) | 9.9<br>(5.7–15.7)          | 8.5<br>(4.9–13.4)  | 21.3<br>(9.7–31.5)  | 21.3<br>(9.7–31.5)  | 2.2<br>(0.7–4.4)  | 2.9<br>(0.9–5.6)  | 3.4<br>(0.0–7.4)   | 2.3<br>(0.3–4.7)  | 1.2<br>(0.3–3.5)   | 1.2<br>(0.3–3.5)   | <0.1<br>(<0.1–5.0) | <0.1<br>(<0.1–5.0) |
| Southern Sub-Saharan Africa | 18.3<br>(12.4–24.2) | 5.7<br>(3.5–8.1)   | 7.5<br>(3.6–12.6)       | 10.0<br>(5.6–15.3)  | 12.7<br>(8.0–18.6)         | 12.1<br>(7.7–17.6) | 16.3<br>(7.2–24.5)  | 16.4<br>(7.4–24.7)  | 4.4<br>(2.0–7.0)  | 5.7<br>(2.7–9.1)  | 7.5<br>(3.6–10.9)  | 2.3<br>(0.9–4.0)  | 1.1<br>(0.5–2.4)   | 1.1<br>(0.5–2.3)   | 6.9<br>(4.4–9.5)   | 7.1<br>(4.6–9.7)   |
| Botswana                    | 25.1<br>(17.9–32.1) | 7.4<br>(4.4–11.2)  | 6.6<br>(2.5–13.1)       | 9.6<br>(4.3–17.5)   | 12.1<br>(7.2–18.9)         | 11.6<br>(7.0–17.6) | 17.0<br>(7.5–25.6)  | 17.0<br>(7.5–25.6)  | 6.7<br>(3.2–10.7) | 8.2<br>(3.9–12.9) | 7.3<br>(2.6–12.6)  | 0.8<br>(0.1–1.7)  | 4.0<br>(1.5–7.7)   | 4.0<br>(1.5–7.7)   | 0.9<br>(<0.1–7.0)  | 0.9<br>(<0.1–7.0)  |
| Eswatini                    | 10.0<br>(5.7–14.5)  | 6.1<br>(3.3–9.6)   | 12.3<br>(5.5–22.2)      | 17.3<br>(9.1–27.7)  | 10.8<br>(6.3–16.4)         | 9.9<br>(6.0–14.8)  | 16.5<br>(7.4–25.0)  | 16.5<br>(7.4–25.0)  | 2.2<br>(0.9–4.0)  | 2.5<br>(1.0–4.4)  | 7.6<br>(3.6–11.6)  | 2.0<br>(0.3–4.2)  | 0.4<br>(<0.1–1.2)  | 0.4<br>(<0.1–1.2)  | 3.3<br>(<0.1–8.1)  | 3.3<br>(<0.1–8.1)  |



|                            | Smoking             |                    | Household air pollution |                     | Ambient particulate matter |                     | Handwashing         |                     | Secondhand smoke |                   | Alcohol use       |                   | High temperature    |                     | Low temperature     |                     |
|----------------------------|---------------------|--------------------|-------------------------|---------------------|----------------------------|---------------------|---------------------|---------------------|------------------|-------------------|-------------------|-------------------|---------------------|---------------------|---------------------|---------------------|
|                            | M                   | F                  | M                       | F                   | M                          | F                   | M                   | F                   | M                | F                 | M                 | F                 | M                   | F                   | M                   | F                   |
| Lesotho                    | 25.4<br>(18.4–32.7) | 5.9<br>(3.4–8.9)   | 17.7<br>(8.8–29.2)      | 23.8<br>(13.9–35.1) | 11.3<br>(6.7–17.1)         | 10.0<br>(5.9–15.3)  | 23.1<br>(10.7–33.9) | 23.1<br>(10.7–33.9) | 6.0<br>(3.3–8.9) | 8.0<br>(4.5–11.6) | 3.9<br>(0.2–7.7)  | 0.7<br>(0.0–2.0)  | <0.1<br>(<0.1–<0.1) | <0.1<br>(<0.1–<0.1) | 21.7<br>(15.2–28.4) | 21.7<br>(15.2–28.4) |
| Namibia                    | 16.8<br>(10.1–24.1) | 11.6<br>(6.4–17.1) | 9.2<br>(3.8–17.1)       | 13.2<br>(6.4–22.5)  | 11.5<br>(6.4–18.2)         | 10.9<br>(6.1–16.6)  | 14.3<br>(6.2–22.0)  | 14.3<br>(6.2–22.0)  | 3.3<br>(1.3–6.0) | 3.5<br>(1.3–6.4)  | 6.5<br>(1.6–11.5) | 1.1<br>(0.0–3.5)  | 3.2<br>(1.3–6.0)    | 3.2<br>(1.3–6.0)    | 1.3<br>(<0.1–6.0)   | 1.3<br>(<0.1–6.0)   |
| South Africa               | 15.5<br>(9.9–21.0)  | 5.1<br>(2.9–7.5)   | 2.5<br>(1.0–4.9)        | 4.0<br>(1.7–7.2)    | 14.1<br>(8.8–20.8)         | 13.6<br>(8.6–19.9)  | 14.9<br>(6.6–22.5)  | 15.1<br>(6.7–23.0)  | 4.5<br>(2.0–7.5) | 5.6<br>(2.6–9.3)  | 9.1<br>(4.7–13.0) | 3.0<br>(1.2–5.0)  | 0.7<br>(0.3–2.0)    | 0.8<br>(0.3–2.1)    | 8.7<br>(6.6–11.1)   | 8.6<br>(6.5–11.0)   |
| Zimbabwe                   | 27.4<br>(19.5–35.1) | 6.9<br>(4.2–9.9)   | 24.3<br>(13.1–37.7)     | 31.4<br>(20.2–44.4) | 8.0<br>(4.7–12.6)          | 6.8<br>(3.9–10.6)   | 20.9<br>(9.6–31.0)  | 20.9<br>(9.6–31.0)  | 3.5<br>(1.8–5.5) | 5.6<br>(3.0–8.5)  | 2.4<br>(0.0–5.8)  | 0.4<br>(0.0–1.1)  | 1.7<br>(0.7–3.8)    | 1.7<br>(0.7–3.8)    | 0.7<br>(<0.1–5.1)   | 0.7<br>(<0.1–5.1)   |
| Western Sub-Saharan Africa | 8.4<br>(5.5–11.4)   | 1.3<br>(0.8–2.0)   | 28.6<br>(18.5–39.1)     | 33.2<br>(24.1–43.1) | 15.9<br>(10.4–23.2)        | 13.7<br>(8.8–19.9)  | 21.7<br>(10.0–32.0) | 21.6<br>(9.9–31.9)  | 3.6<br>(1.9–5.5) | 3.7<br>(1.9–5.7)  | 5.1<br>(1.9–8.0)  | 1.4<br>(0.1–2.8)  | 5.1<br>(0.4–18.9)   | 5.0<br>(0.4–20.1)   | 0.5<br>(<0.1–2.5)   | 0.4<br>(<0.1–2.4)   |
| Benin                      | 12.2<br>(7.5–17.7)  | 1.3<br>(0.7–2.4)   | 37.7<br>(23.4–51.9)     | 44.3<br>(31.5–55.4) | 11.3<br>(5.6–18.8)         | 8.8<br>(4.1–15.1)   | 22.1<br>(10.1–32.6) | 22.1<br>(10.1–32.6) | 2.7<br>(1.4–4.4) | 3.2<br>(1.5–5.0)  | 2.5<br>(0.2–5.5)  | 0.6<br>(0.0–1.8)  | 3.3<br>(<0.1–18.5)  | 3.3<br>(<0.1–18.5)  | <0.1<br>(<0.1–1.2)  | <0.1<br>(<0.1–1.2)  |
| Burkina Faso               | 5.7<br>(3.1–8.6)    | 0.5<br>(0.2–0.8)   | 46.4<br>(30.9–59.2)     | 50.8<br>(38.4–64.4) | 8.4<br>(2.9–16.6)          | 6.0<br>(2.0–12.9)   | 22.2<br>(10.2–32.7) | 22.2<br>(10.2–32.7) | 2.9<br>(1.2–5.1) | 3.8<br>(1.6–6.6)  | 7.0<br>(1.4–13.3) | 3.5<br>(0.0–8.9)  | 4.6<br>(<0.1–34.1)  | 4.6<br>(<0.1–34.1)  | <0.1<br>(<0.1–3.1)  | <0.1<br>(<0.1–3.1)  |
| Cabo Verde                 | 5.7<br>(3.5–8.6)    | 1.3<br>(0.7–2.2)   | 5.5<br>(2.4–10.4)       | 8.0<br>(4.1–13.7)   | 22.0<br>(13.6–31.9)        | 21.0<br>(13.2–30.6) | 19.0<br>(8.5–28.3)  | 19.0<br>(8.5–28.3)  | 3.3<br>(1.6–5.4) | 3.5<br>(1.6–5.7)  | 5.5<br>(1.9–9.2)  | 1.9<br>(0.2–4.1)  | 0.2<br>(<0.1–1.1)   | 0.2<br>(<0.1–1.1)   | <0.1<br>(<0.1–6.3)  | <0.1<br>(<0.1–6.3)  |
| Cameroon                   | 9.4<br>(6.0–13.1)   | 1.1<br>(0.5–1.9)   | 19.3<br>(10.4–30.8)     | 25.8<br>(15.8–37.7) | 20.9<br>(13.2–29.7)        | 18.3<br>(11.5–26.1) | 21.8<br>(10.0–32.1) | 21.8<br>(10.0–32.1) | 1.9<br>(0.9–3.1) | 2.9<br>(1.4–4.8)  | 7.3<br>(3.3–11.4) | 2.6<br>(0.4–5.1)  | 2.0<br>(0.1–7.1)    | 2.0<br>(0.1–7.1)    | <0.1<br>(<0.1–1.6)  | <0.1<br>(<0.1–1.6)  |
| Chad                       | 9.8<br>(5.4–14.6)   | 2.5<br>(1.2–4.2)   | 47.3<br>(32.6–60.6)     | 51.6<br>(39.7–65.9) | 8.4<br>(2.9–17.8)          | 6.0<br>(2.1–13.8)   | 22.3<br>(10.2–32.8) | 22.3<br>(10.2–32.8) | 2.6<br>(1.2–4.5) | 3.8<br>(1.7–6.3)  | 2.4<br>(<0.1–5.4) | 1.4<br>(0.0–3.7)  | 7.0<br>(0.4–22.9)   | 7.0<br>(0.4–22.9)   | 1.3<br>(<0.1–7.7)   | 1.3<br>(<0.1–7.7)   |
| Côte d'Ivoire              | 10.6<br>(7.0–14.6)  | 4.1<br>(2.2–7.0)   | 29.4<br>(17.1–43.7)     | 36.6<br>(24.5–48.9) | 15.5<br>(8.3–25.4)         | 12.7<br>(6.4–21.5)  | 20.8<br>(9.5–31.0)  | 20.8<br>(9.5–31.0)  | 6.0<br>(3.3–9.1) | 6.9<br>(3.8–10.4) | 4.8<br>(0.4–9.6)  | 1.4<br>(0.0–4.0)  | 1.6<br>(<0.1–5.7)   | 1.6<br>(<0.1–5.7)   | 0.2<br>(<0.1–1.2)   | 0.2<br>(<0.1–1.2)   |
| Gambia                     | 14.0<br>(9.3–19.4)  | 1.1<br>(0.5–1.9)   | 34.9<br>(21.2–48.8)     | 41.9<br>(28.7–53.4) | 14.2<br>(7.3–23.0)         | 11.3<br>(5.6–19.1)  | 21.9<br>(10.1–32.3) | 21.9<br>(10.1–32.3) | 5.8<br>(3.0–9.0) | 7.7<br>(4.1–11.8) | 2.9<br>(0.3–5.9)  | 0.7<br>(0.0–2.1)  | 2.2<br>(<0.1–20.9)  | 2.2<br>(<0.1–20.9)  | 0.1<br>(<0.1–1.5)   | 0.1<br>(<0.1–1.5)   |
| Ghana                      | 7.5<br>(4.3–11.1)   | 1.6<br>(0.8–2.6)   | 14.2<br>(7.1–23.9)      | 19.7<br>(11.2–30.3) | 20.3<br>(12.9–30.3)        | 18.4<br>(11.5–27.6) | 22.3<br>(10.3–32.8) | 22.3<br>(10.3–32.8) | 1.6<br>(0.7–2.7) | 1.9<br>(0.9–3.1)  | 6.8<br>(1.7–11.7) | 1.2<br>(0.0–3.1)  | 2.9<br>(<0.1–18.5)  | 2.9<br>(<0.1–18.5)  | <0.1<br>(<0.1–0.7)  | <0.1<br>(<0.1–0.7)  |
| Guinea                     | 15.5<br>(9.8–21.6)  | 1.9<br>(1.0–3.3)   | 43.6<br>(28.5–56.2)     | 48.8<br>(36.2–60.4) | 9.9<br>(4.2–17.7)          | 7.3<br>(3.1–14.2)   | 22.3<br>(10.3–32.8) | 22.3<br>(10.3–32.8) | 3.7<br>(1.9–6.0) | 4.6<br>(2.3–7.2)  | 1.1<br>(0.0–2.7)  | 0.2<br>(0.0–0.8)  | 2.7<br>(0.7–7.1)    | 2.7<br>(0.7–7.1)    | 0.1<br>(<0.1–1.3)   | 0.1<br>(<0.1–1.3)   |
| Guinea-Bissau              | 5.9<br>(3.6–8.4)    | 0.8<br>(0.4–1.3)   | 41.0<br>(25.8–54.2)     | 46.9<br>(33.9–58.0) | 11.2<br>(5.0–19.4)         | 8.5<br>(3.7–15.5)   | 22.3<br>(10.3–32.8) | 22.3<br>(10.3–32.8) | 3.7<br>(1.9–5.9) | 4.4<br>(2.2–6.8)  | 3.5<br>(0.8–6.7)  | 0.9<br>(0.0–2.2)  | 2.2<br>(<0.1–22.7)  | 2.2<br>(<0.1–22.7)  | <0.1<br>(<0.1–1.3)  | <0.1<br>(<0.1–1.3)  |
| Liberia                    | 7.6<br>(4.3–11.3)   | 1.3<br>(0.6–2.3)   | 38.4<br>(23.3–51.5)     | 44.9<br>(32.1–56.0) | 11.8<br>(5.7–20.2)         | 9.0<br>(4.4–15.8)   | 23.3<br>(10.8–34.1) | 23.3<br>(10.8–34.1) | 2.1<br>(0.9–3.7) | 2.8<br>(1.2–5.0)  | 3.3<br>(0.5–6.7)  | 1.2<br>(<0.1–2.8) | 0.9<br>(<0.1–3.3)   | 0.9<br>(<0.1–3.3)   | 0.1<br>(<0.1–2.0)   | 0.1<br>(<0.1–2.0)   |
| Mali                       | 12.4<br>(7.4–17.8)  | 1.2<br>(0.5–2.2)   | 46.8<br>(31.2–59.6)     | 51.3<br>(38.0–65.0) | 9.0<br>(3.1–17.7)          | 6.5<br>(2.3–13.8)   | 21.9<br>(10.1–32.3) | 21.9<br>(10.1–32.3) | 2.9<br>(1.3–4.8) | 3.6<br>(1.6–6.0)  | 1.4<br>(0.3–2.6)  | 0.8<br>(0.0–2.0)  | 7.3<br>(<0.1–26.7)  | 7.3<br>(<0.1–26.7)  | 1.3<br>(<0.1–13.3)  | 1.3<br>(<0.1–13.3)  |
| Mauritania                 | 7.2<br>(3.7–11.1)   | 0.7<br>(0.3–1.4)   | 14.9<br>(7.2–25.1)      | 20.4<br>(11.4–30.8) | 22.6<br>(13.2–34.5)        | 20.3<br>(11.6–31.1) | 19.6<br>(8.8–29.2)  | 19.6<br>(8.8–29.2)  | 3.0<br>(1.3–5.1) | 3.7<br>(1.6–6.2)  | 0.0<br>(0.0–0.0)  | <0.1<br>(0.0–0.0) | 8.0<br>(1.7–19.5)   | 8.0<br>(1.7–19.5)   | 1.9<br>(<0.1–13.0)  | 1.9<br>(<0.1–13.0)  |

|                       | Smoking             |                  | Household air pollution |                     | Ambient particulate matter |                     | Handwashing         |                     | Secondhand smoke  |                   | Alcohol use       |                   | High temperature   |                    | Low temperature    |                    |
|-----------------------|---------------------|------------------|-------------------------|---------------------|----------------------------|---------------------|---------------------|---------------------|-------------------|-------------------|-------------------|-------------------|--------------------|--------------------|--------------------|--------------------|
|                       | M                   | F                | M                       | F                   | M                          | F                   | M                   | F                   | M                 | F                 | M                 | F                 | M                  | F                  | M                  | F                  |
| Niger                 | 5.6<br>(3.4–8.2)    | 0.5<br>(0.2–0.9) | 51.0<br>(35.2–69.0)     | 55.1<br>(40.4–75.8) | 7.5<br>(2.1–19.0)          | 5.3<br>(1.5–14.5)   | 21.4<br>(9.8–31.7)  | 21.4<br>(9.8–31.7)  | 2.7<br>(1.3–4.5)  | 3.7<br>(1.7–5.8)  | 0.2<br>(0.0–0.9)  | 0.1<br>(0.0–0.4)  | 8.4<br>(0.5–23.3)  | 8.4<br>(0.5–23.3)  | 1.6<br>(<0.1–11.5) | 1.6<br>(<0.1–11.5) |
| Nigeria               | 6.1<br>(4.2–8.5)    | 1.0<br>(0.5–1.5) | 20.8<br>(12.9–30.2)     | 23.5<br>(15.9–32.6) | 19.3<br>(12.1–28.3)        | 17.6<br>(10.8–25.8) | 21.7<br>(9.9–31.8)  | 21.6<br>(9.9–31.8)  | 4.2<br>(2.2–6.4)  | 2.8<br>(1.5–4.3)  | 6.9<br>(2.7–11.0) | 1.5<br>(<0.1–3.3) | 7.4<br>(1.0–34.7)  | 6.8<br>(0.7–34.3)  | 0.8<br>(<0.1–2.3)  | 0.7<br>(<0.1–2.0)  |
| Sao Tome and Principe | 6.6<br>(4.3–9.6)    | 1.3<br>(0.6–2.3) | 17.3<br>(8.5–28.6)      | 23.3<br>(13.5–34.4) | 12.5<br>(6.9–19.8)         | 11.0<br>(6.0–17.6)  | 17.4<br>(7.7–26.1)  | 17.4<br>(7.7–26.1)  | 1.2<br>(0.5–1.9)  | 1.4<br>(0.7–2.2)  | 6.7<br>(2.6–10.7) | 2.3<br>(0.2–4.9)  | 0.9<br>(<0.1–3.7)  | 0.9<br>(<0.1–3.7)  | <0.1<br>(<0.1–1.9) | <0.1<br>(<0.1–1.9) |
| Senegal               | 9.9<br>(6.7–14.0)   | 0.6<br>(0.3–1.0) | 32.1<br>(18.7–45.3)     | 38.6<br>(26.3–50.1) | 15.1<br>(7.9–24.1)         | 12.0<br>(5.9–20.1)  | 18.8<br>(8.4–28.1)  | 18.8<br>(8.4–28.1)  | 7.3<br>(4.1–10.7) | 8.8<br>(5.0–12.9) | 0.1<br>(0.0–0.4)  | <0.1<br>(0.0–0.1) | 4.2<br>(<0.1–30.1) | 4.2<br>(<0.1–30.1) | 0.1<br>(<0.1–2.2)  | 0.1<br>(<0.1–2.2)  |
| Sierra Leone          | 12.7<br>(7.0–18.7)  | 1.8<br>(0.8–3.2) | 41.7<br>(26.6–54.7)     | 47.5<br>(34.8–58.5) | 10.5<br>(4.5–18.6)         | 7.9<br>(3.5–14.6)   | 22.2<br>(10.2–32.6) | 22.2<br>(10.2–32.6) | 4.0<br>(1.5–7.2)  | 5.6<br>(2.2–10.0) | 4.8<br>(1.4–8.5)  | 1.4<br>(0.0–3.4)  | 1.8<br>(<0.1–4.3)  | 1.8<br>(<0.1–4.3)  | 0.2<br>(<0.1–1.5)  | 0.2<br>(<0.1–1.5)  |
| Togo                  | 17.6<br>(12.8–22.9) | 3.3<br>(1.8–5.3) | 32.2<br>(19.3–46.2)     | 39.8<br>(27.4–51.7) | 13.0<br>(7.0–20.7)         | 10.5<br>(5.7–16.7)  | 22.0<br>(10.1–32.5) | 22.0<br>(10.1–32.5) | 3.6<br>(2.0–5.4)  | 3.9<br>(2.2–5.7)  | 2.9<br>(0.4–6.1)  | 0.7<br>(0.0–2.2)  | 2.7<br>(<0.1–13.0) | 2.7<br>(<0.1–13.0) | 0.1<br>(<0.1–0.9)  | 0.1<br>(<0.1–0.9)  |
